# Supplementary material for: Transcriptomic changes in the testes and brain associated with sperm competition risk in male zebra finches
Source: Research Square preprint supplement (doi:10.21203/rs.3.rs-3456692/v1), 2023-11-28
Supplement: Supplementary file 1 [file 1c8268125b8a9913db8f6163.xlsx]

## Sheet: a_Modules_Treatment_ANOVA
Modules	# Genes	F	p	Qval	Factor
TES Saddlebrown	140	7.472	0.0083	0.3168	Treatment
TES Paleturquoise	128	7.18	0.0096	0.3168	Treatment
TES Orangered3	40	5.663	0.0207	0.4554	Treatment
TES Cyan	265	4.654	0.0352	0.4831	Treatment
TES Lightgreen	210	4.581	0.0366	0.4831	Treatment
TES Skyblue	151	3.039	0.0867	0.8859	Treatment
TES Skyblue2	45	2.605	0.1121	0.8859	Treatment
TES Brown4	77	2.352	0.1306	0.8859	Treatment
TES Coral2	52	2.304	0.1346	0.8859	Treatment
TES Yellow4	45	2.208	0.1428	0.8859	Treatment
TES Darkslateblue	74	1.979	0.165	0.8859	Treatment
TES Thistle1	69	1.934	0.1697	0.8859	Treatment
TES Black	342	1.891	0.1745	0.8859	Treatment
TES Pink	341	1.763	0.1896	0.8938	Treatment
TES Lightyellow	208	1.484	0.2282	0.9092	Treatment
TES Darkorange	182	1.484	0.2282	0.9092	Treatment
TES Blue	3677	1.446	0.2342	0.9092	Treatment
TES Navajowhite2	67	1.265	0.2655	0.9108	Treatment
TES Antiquewhite4	52	1.162	0.2856	0.9108	Treatment
TES Steelblue	132	1.096	0.2995	0.9108	Treatment
TES Mediumpurple2	34	1.001	0.3212	0.9108	Treatment
TES Green	721	0.744	0.3921	0.9108	Treatment
TES Turquoise	4082	0.666	0.4177	0.9108	Treatment
TES Darkgreen	205	0.666	0.4177	0.9108	Treatment
TES Sienna3	2053	0.594	0.4442	0.9108	Treatment
TES Lightcyan1	91	0.594	0.4442	0.9108	Treatment
TES Orangered4	103	0.57	0.4532	0.9108	Treatment
TES Royalblue	208	0.57	0.4532	0.9108	Treatment
TES Midnightblue	244	0.525	0.4715	0.9108	Treatment
TES Plum2	71	0.503	0.4809	0.9108	Treatment
TES Darkorange2	79	0.461	0.4998	0.9108	Treatment
TES Plum	41	0.401	0.5289	0.9108	Treatment
TES Honeydew1	58	0.382	0.5388	0.9108	Treatment
TES White	179	0.364	0.5488	0.9108	Treatment
TES Salmon	280	0.346	0.5589	0.9108	Treatment
TES Red	974	0.346	0.5589	0.9108	Treatment
TES Violet	127	0.346	0.5589	0.9108	Treatment
TES Lightcyan	220	0.328	0.569	0.9108	Treatment
TES Darkred	208	0.311	0.5793	0.9108	Treatment
TES Orange	189	0.294	0.5896	0.9108	Treatment
TES Yellow	783	0.278	0.6	0.9108	Treatment
TES Thistle2	70	0.262	0.6105	0.9108	Treatment
TES Skyblue3	104	0.247	0.621	0.9108	Treatment
TES Lightpink4	60	0.247	0.621	0.9108	Treatment
TES Lavenderblush3	58	0.247	0.621	0.9108	Treatment
TES Coral1	53	0.142	0.7081	0.9521	Treatment
TES Mediumpurple3	97	0.142	0.7081	0.9521	Treatment
TES Lightsteelblue	32	0.142	0.7081	0.9521	Treatment
TES Purple	335	0.142	0.7081	0.9521	Treatment
TES Greenyellow	392	0.12	0.7306	0.9521	Treatment
TES Maroon	62	0.11	0.7419	0.9521	Treatment
TES Darkturquoise	196	0.1	0.7532	0.9521	Treatment
TES Ivory	81	0.091	0.7646	0.9521	Treatment
TES Skyblue1	44	0.073	0.7876	0.9626	Treatment
TES Salmon4	68	0.044	0.834	0.9881	Treatment
TES Darkgrey	192	0.033	0.8575	0.9881	Treatment
TES Mediumorchid	50	0.023	0.881	0.9881	Treatment
TES Floralwhite	80	0.023	0.881	0.9881	Treatment
TES Bisque4	75	0.018	0.8929	0.9881	Treatment
TES Yellowgreen	107	0.008	0.9285	0.9881	Treatment
TES Darkmagenta	124	0.006	0.9404	0.9881	Treatment
TES Palevioletred3	67	0.004	0.9523	0.9881	Treatment
TES Darkolivegreen	127	0.002	0.9642	0.9881	Treatment
TES Grey60	219	0.001	0.9761	0.9881	Treatment
TES Magenta	336	0.001	0.9761	0.9881	Treatment
TES Plum1	104	0	0.9881	0.9881	Treatment

## Sheet: b_GEN_IDs
TES Saddlebrown	TES Paleturquoise	TES Orangered3	TES Cyan	TES Lightgreen	TES Skyblue	TES Skyblue2	TES Brown4	TES Coral2	TES Yellow4	TES Darkslateblue	TES Thistle1	TES Black	TES Pink	TES Lightyellow	TES Darkorange	TES Blue	TES Navajowhite2	TES Antiquewhite4	TES Steelblue	TES Mediumpurple2	TES Green	TES Turquoise	TES Darkgreen	TES Sienna3	TES Lightcyan1	TES Orangered4	TES Royalblue	TES Midnightblue	TES Plum2	TES Darkorange2	TES Plum	TES Honeydew1	TES White	TES Salmon	TES Red	TES Violet	TES Lightcyan	TES Darkred	TES Orange	TES Yellow	TES Thistle2	TES Skyblue3	TES Lightpink4	TES Lavenderblush3	TES Coral1	TES Mediumpurple3	TES Lightsteelblue	TES Purple	TES Greenyellow
ABCC2	ACRBP	APOLD1	ABCB1	ABCC9	ADAMTSL5	FAM104A	ADAMTS9	AMN1	ANHX	AGBL2	ACADSB	ABCB9	ABRAXAS1	AKIP1	ACOD1	A1CF	ABCD3	ATP6V1G3	ABCB11	APH1A	AAR2	AAGAB	ABCD4	AADAT	ADHFE1	ALKBH8	AASDHPPT	AHCYL1	C6H10orf71	AKTIP	ACTN1	ABHD14A	ABAT	ADAMTS18	AAAS	AIG1	AAK1	ADCY9	AARS2	A2M	ADPRHL1	ANAPC15	ADCY7	ABCA12	ARPC5	ACTN2	ANXA13	AADAC	ABCA1
ABLIM1	AGPS	ARC	ADAR	ACSS3	ADM	LOC100221543	ADSL	ARHGEF5	C15H12orf49	ALDH6A1	BLOC1S4	ABHD5	ACSL4	ANO1	AKNA	A4GNT	ADGRL2	COL11A1	AOX1	ARNT	ABCB8	AAMDC	ADRA2C	ABCA5	ANGPT1	AMER2	ABHD13	AJAP1	FAM169A	ARHGEF18	ACYP1	ABTB1	ACAT2	ADGRB1	ABHD11	ARHGAP18	ABCG1	ADD1	ABCG5	ABCC8	AP1S2	CUEDC2	BCO1	AGAP1	CEP97	AGPAT5	CHMP4C	ABHD17C	ABCA2
ADK	AIMP2	ASS1	ADARB2	AGK	APC	LOC100222403	ANAPC5	CCT2	C15H22orf15	ANKRD9	CALB1	ABI3	AGO2	APIP	APOF	AACS	ADGRL4	COLGALT2	ASPA	BOLA1	ABRAXAS2	AAMP	AKAP5	ABCB7	ARL14	ARHGEF7	ALG11	ARHGAP35	GJA5	ATP6V0A4	ADCK1	ASB14	AGTR1	AHR	ABHD14B	BPNT1	ACP6	AFDN	ABHD12	ABI3BP	ARX	DNAJC30	CA5A	ANKS1B	CFAP99	AKAP12	DPYS	ADAMTS15	ABCC5
ADO	ANKRD13A	ATF3	AFF1	AMDHD1	B4GALT7	LOC100226112	ASB15	CHADL	CABIN1	ASMT	COBL	ACER1	AK2	ARNTL	ARHGAP15	AANAT	AGL	CRB1	ATG9A	ITGA10	ABT1	AASS	AP4S1	ABCC10	AZIN1	ARL11	ALOX5AP	ARMC9	GRID1	CAPNS2	AQP8	BRCC3	ALDH1L2	AKAP6	ACAD10	CALHM5	AGRN	ALDH9A1	ACBD3	ACAD8	ASMTL	DOLK	CARMIL2	ATIC	DRG2	ARFGEF3	FER1L6	AGR2	ACSBG1
ADRB1	ARL3	CCN1	AHRR	AMIGO2	BDP1	LOC100232259	CBY1	CHRM2	CABP1	BDKRB1	DARS2	ACTL6A	AKAIN1	ASCL3	ARHGAP30	AARS1	AK5	CYTIP	B3GALT1	LOC105758841	ACSF2	AATF	AQR	ABCF2	BAALC	CCDC138	ANKRD42	BCL11B	GRM5	CCNE1	CAMK2N1	CAMKV	ARHGAP44	ALOX5	ACBD4	CCDC170	AHNAK2	ALG2	ADAM17	ACKR3	ATM	ENO1	CENPN	CHRNA9	DTD2	B3GAT2	GGH	AGR3	ADORA2A
AKAP14	BCL2L10	CCN2	ALDH5A1	ANKRD26	BPNT2	LOC101233115	CD9	EEA1	COQ5	C1QTNF4	DNAH5	ADORA2B	AKAP11	BBOX1	ASIC1	AASDH	AKNAD1	DDX49	BBS5	LOC105760997	ACTG1	AATK	ARFGAP2	ABHD17B	C2H8orf76	CCDC90B	ARHGAP20	C1H3orf52	IMPG1	CDH13	CHRNA6	CELSR3	BGLAP	ANKS4B	ACSF3	CCN6	AIFM1	AP3B1	ADGB	ACOX1	CARS2	HSD3B7	CMC2	CORIN	GATD1	C3H2orf50	LOC100224067	AK3	AFF4
ANTXRL	BLMH	DUSP1	ALG6	ANKRD54	CA14	LOC115490631	COG5	GSG1	DDT	C5H11orf58	FBXO22	AMOT	AMT	BDNF	B2M	ABCA3	B3GALT2	DPH5	CARF	LOC115493164	ADAM28	ABCA13	ARHGAP1	ACAA1	CCN3	CD58	ARL13A	CAV3	IRF2BPL	CEP89	CIPC	CHDH	C2CD4C	AP1M2	ACTL6B	CCSAP	APC2	AR	ALKAL2	ACP5	CASP2	LOC100219398	CMIP	CUTA	HDLBP	CCR6	LOC101234096	ALDH1A1	AFG3L2
ANXA11	CACFD1	EGR1	ANKIB1	ANO4	CBX4	LOC115490691	DENND2A	HEBP1	DDX51	C5H15orf41	FIGNL1	ANKRD49	ANGEL1	BRSK2	C1QB	ABCB6	CCDC18	EEF2	CCDC141	LOC115495398	ADAMTS14	ABCA4	ASPG	ACAA2	CDS1	CLN5	ATP7B	CBFA2T3	KCTD14	DCP1B	FAM161B	DNAAF6	CACNG4	BACH2	ACTR3	CEP43	ARL14EP	ARHGAP12	ANAPC1	ACTA1	CHST10	LOC100220698	CMTR2	DDX11	IQCE	CDC40	LOC115493855	ALDH8A1	AKAP9
AP3M1	CAPZB	EGR4	ANKMY2	APPL2	CD47	LOC115490692	ERP27	HEPACAM	DEPDC5	CAPN3	FSCN2	APOO	ANKFY1	C5H11orf16	C1QC	ABCF1	CDCP2	FA2H	CCNYL1	LOC115498426	ADAMTS19	ABCA7	ATP5MPL	ACADS	CNTD1	CLNS1A	BEND2	CCND3	LATS2	DEPDC7	GFAP	DNAH1	CDH19	BTBD9	ADAM23	CRIPT	ATAD3A	ARHGEF38	ANKEF1	ACTA2	ERCC5	LOC100221052	CYLD	FTCD	LOC100222284	CEP57L1	LOC115493861	AMN	AMFR
ARHGAP22	CCDC181	FOS	ANKRD33B	ATXN10	CDYL	LOC115492309	FOXRED2	HMGA2	FBXW8	CHID1	GCM2	ARL6IP5	ANKRD27	CARNS1	C2H18orf63	ABCG4	COL24A1	GPSM2	CDH8	LOC115498483	ADAMTS6	ABCB5	ATP6V1D	ACAP2	CSRP3	COG6	C1H13orf42	CEPT1	LOC100219353	DNAAF1	HARBI1	EEFSEC	CDK5R2	BUB1B	ADAT1	DACT2	ATP2B2	ASAP1	ANKRD6	ACTB	FAN1	LOC100223636	DHX38	ITGB5	LOC100229766	CNIH4	LOC115493917	APOBEC2	ANKRD11
ATRNL1	CCNG2	FUBP3	ANKRD66	AVPR1A	CEP55	LOC115492510	GMEB1	IFRD1	GGT5	CPSF2	GJD3	ARL8B	APBA1	CAT	CALHM6	ABCG8	COP1	HEBP2	CERS6	LOC115498499	ADIPOR2	ABCC4	BATF	ACAP3	DDRGK1	CTPS2	C1HXorf21	CLDN5	LOC100220853	DUS2	HSD17B12	ERC2	CELF4	C18H17orf67	ADGRA1	DISC1	ATP5ME	ASIP	APMAP	ACTG2	FANCB	LOC100225575	DRC7	KALRN	LOC101233494	CNR1	LOC115493918	AQP5	ANKRD17
BICC1	CDKAL1	FUNDC2	ANLN	BICD1	CFAP43	LOC115494638	GRIP1	IFT27	GNAZ	EHD4	GPR141	ARL9	APPBP2	CCDC32	CCL17	ABHD17A	DMAP1	HENMT1	CHN1	LOC115498500	ADRB3	ABCD2	BDKRB2	ACBD7	DEPTOR	DAW1	C1R	CNGA1	LOC100227445	GCSH	ISM2	GNAI2	CETP	CACNB3	ADGRD2	ECHDC1	ATP5PF	BMPR2	APOB	ADAM15	FOXM1	LOC100226943	ENKD1	LOC100221315	LOC105759092	COL19A1	LOC115493939	ASDURF	APPL1
BLNK	CHFR	GEM	AOAH	C1AH12orf66	CILK1	LOC116806658	GXYLT1	IRAG2	GUCD1	ERH	HBAP	ASZ1	AREL1	CCDC34	CD14	ABHD18	DNAJB4	KCNT2	CHRNA1	LOC115498502	AGGF1	ABCG2	BET1L	ACE2	DHRS11	DCT	C1S	COG8	LOC100232375	GLG1	JAG2	GPR62	CHGA	CCDC63	ADGRG2	EFCAB2	BAG5	C18H17orf80	ARID1B	ADAM19	FRMPD4	LOC100230077	EXOC3L1	LOC100226561	LOC105759652	COL21A1	LOC115493967	ATP13A4	ARHGAP32
BMS1	CMTM3	ITCH	ARHGAP21	C1AH12orf73	CITED2	LOC116806659	IRAK4	ISX	KLHL22	FMNL3	HUS1	ATG4B	ASB7	CCDC86	CD2	ABHD8	ERI3	KXD1	COL5A2	LOC116809290	AK1	ABHD10	BICRAL	ACKR4	DNAJC5B	DHRS12	CASR	CSNK1D	LOC105759119	HEATR3	KATNBL1	HEMK1	CHODL	CCDC65	ADGRL3	EIPR1	BCAN	CAMSAP2	ASRGL1	ADAMTS1	GYG2	LOC100230925	EXOSC6	LOC100230707	LOC105760079	COL9A1	LOC115494017	ATP6V0D2	ARHGEF4
C6H10orf95	CMTM6	JMJD6	ARL5B	CAPRIN2	CNTRL	LOC116806663	LLPH	KIAA0930	LOC100190349	FOXG1	IMPA2	ATP13A1	ASCL4	CCND1	CD3E	ABI1	EVI5	KYAT3	CREB1	LOC116809302	ALAD	ABHD12B	BTBD7	ACMSD	ESRP1	EEF1AKMT1	CCDC122	DHDH	LOC115491160	HSF4	LGMN	HESX1	CHRNA3	CD8B	ADPGK	ELOVL5	BCAP29	CARMIL1	BCL11A	ADAMTS10	HS6ST3	LOC105758561	FCSK	LOC115490676	LOC105760323	DEGS1	LOC115494019	AUTS2	ARID4B
CABCOCO1	COMMD2	JUN	ARMC3	CAPS2	CORO6	LOC116806673	LMOD2	L3MBTL2	LOC100221772	FUT8	INSIG1	ATXN2	ATP5F1D	CEND1	CD40LG	ABI2	FAM102B	LOC100218765	CWC22	LOC116809303	ALMS1	ABHD2	C5H11orf49	ACO1	FBXO32	EIF2S3	CCDC82	EXD3	LOC115491227	IL17C	LOC100221985	HEXD	CHRNB4	CEP152	AGA	EML4	BNC2	CCDC88C	BCL2L11	ADAMTS3	IL1RAPL1	LOC105759757	FOXL1	LOC115490699	LOC115490885	DISP1	LOC116807880	B3GALT5	ARIH2
CALHM2	COPB2	LOC100190429	ARMC4	CBLL1	CRAMP1	LOC116806675	LOC100219617	LOC100217693	LOC100232469	GALC	KCNB2	AVPR1B	ATP8A1	CHKA	CD44	ABL1	FNDC7	LOC100226449	DCAF17	LYSMD1	ALX3	ABL2	C5H14orf132	ACOT11	GNS	EXPH5	CCDC89	EXOC3L2	LOC115493537	IRX3	LOC100229594	HMCES	CLPS	CFTR	AGBL5	ENPP3	BOD1	CDKL5	BIRC5	ADAMTS8	INPP4A	LOC115490855	FTO	LOC115490939	LOC115490952	DTL	LOC116807892	BRD8	ARPC2
CCDC6	COPS5	LOC100219858	ARPC5L	CCDC134	CRLF1	LOC116806680	LOC100220534	LOC100221426	LOC115490748	GANC	KCNG2	B9D1	ATR	CHST14	CD6	ACACB	GCLM	LOC101233590	DHX40	MPZ	AMMECR1L	ABR	CCDC177	ACOX2	IMPA1	FGF14	CD99	FAM133B	LOC115493765	LCAT	LOC101233080	HRH1	CNTNAP2	CHKB	AHCYL2	EXO1	C2H8orf88	CDO1	BMP2	ADAMTSL2	INTS4	LOC115491662	GFOD2	LOC115490940	LOC115491697	EGLN1	LOC116807895	BTBD10	ASH1L
CH25H	CRLF3	LOC100223087	ARPP21	CCDC146	CUL3	LOC116807156	LOC100221492	LOC100222415	LOC115493443	GJD2	KCNK9	BCL9	ATXN1L	CHURC1	CD74	ACAD11	GLMN	LOC101234018	DIP2A	MRPS21	AMPD2	ABRACL	CCDC85C	ACSBG2	LOC100217483	FHL2	CENPJ	FUT7	LOC115493782	LOC100218016	LOC115495308	HYAL3	CPLX1	CLIC6	AKAP8L	EZR	CARD8	CHPF	C3H1orf198	ADCY5	LNX2	LOC115491921	GINS3	LOC115491104	LOC115493266	FILIP1	LOC116807902	BTG1	ATAD2B
CNNM1	CSNK1G1	LOC115492373	ASB4	CCDC71L	DBNDD2	LOC116807216	LOC100221944	LOC105758584	LOC115493447	GPR68	KCNS2	BLOC1S2	BBX	CLP1	CETN2	ACAD9	GRM7	LOC115496173	DLX1	NDUFS2	ANKDD1B	ACACA	CCNK	ACSL6	LOC100224987	FUT4	CEP295	GEN1	LOC115493856	LOC100218307	LOC115495404	IL17RD	DBH	CMTR1	AKIRIN2	FAM83B	CCDC12	CHST9	C4H4orf54	ADGRA2	LOC100219300	LOC115492481	HERPUD1	LOC115493470	LOC115493809	FRMD1	LOC116807905	C26H1orf116	ATP6V0C
CSGALNACT2	CSPP1	LOC115493139	ASNS	CD36	DCP2	LOC116807388	LOC100229139	LOC115490773	LOC115497335	IFT43	KLF6	BNIP2	BRICD5	CNTF	CHRNG	ACE	HYI	LOC115496209	DLX2	NUDT17	ANKRD13D	ACADL	CDC42BPB	ACSS1	LOC100227844	GRIA4	CLDN34	GHRHR	LOC115494022	LOC100227575	LOC115495495	ITIH4	DDC	CNGB1	AKR7A2	FUCA2	CCNL2	COL4A5	CAPN11	AEBP1	LOC100219910	LOC115493297	HSD17B2	LOC115493741	LOC115496345	GINM1	MATN2	C26H1orf162	ATRX
DLG5	CWC15	LOC115493476	ATOX1	CELSR1	DDX6	LOC116807398	LOC100229177	LOC115490983	LOC115497354	ITPK1	LAMA1	BRCA1	BRIP1	COPB1	CMPK2	ACER3	IPO13	LOC115496215	FAM117B	PI4KB	ANKRD34A	ACADM	CEP128	ACSS2	LOC115493180	GTF2F2	CLTRN	GMPPB	LOC115494132	LOC100228584	LOC115495504	KLF15	DIRAS2	CNTLN	ALG3	GCFC2	CCT8	CRIM1	CEP162	AFAP1L2	LOC100220618	LOC115493330	KCNG4	LOC115494293	LOC115496930	HACE1	MCMDC2	C4H4orf19	B3GNT2
DNAJC18	CWC27	LOC115493595	ATP2C1	CFAP54	DNAAF5	LOC116807404	LOC105758557	LOC115491182	LOC115497366	IVD	LOC100228865	BTBD1	BTBD11	CYBASC3	COTL1	ACKR2	KDM1B	LOC115496221	FASTKD2	POGZ	ANKRD39	ACAN	CEP170B	ACTR1A	LOC115493339	GTF3A	CLYBL	GPAA1	LOC115494341	LOC100232129	LOC115495508	LOC100189947	DNMBP	COQ2	ALKBH7	GPR137B	CEMIP	CTTN	CFAP61	AHDC1	LOC100225909	LOC115493331	KLHDC4	LOC115494750	LOC115497212	INTS5	MIB1	C7H21orf58	BAZ2B
ENO4	CX3CR1	LOC116806613	ATPSCKMT	CHPT1	DONSON	LOC116807619	LOC105760244	LOC115493352	LOC115497394	KCNK10	LOC100229858	BTF3L4	BTBD6	DENND2B	CPTP	ACLY	KIF14	LOC115496222	G6PC2	POLR3C	AP1G1	ACBD5	CHST1	ACTR2	LOC115493394	IFT88	CNKSR2	GTF2A1	LOC115494399	LOC101233818	LOC115495509	LOC100219242	DOC2B	CSRNP3	AMIGO1	GTF2A1L	CEP20	CYP19A1	CLIP4	AICDA	LOC100227226	LOC115493334	LOC100227703	LOC115494775	LOC115498199	LATS1	MRPL53	C9	BCAS2
ENTPD1	DNAI1	LOC116806734	ATXN1	CHST11	DYNC2H1	LOC116808055	LOC115491098	LOC115493369	LOC115497433	KIF26A	LOC100230680	C1AH12orf29	C10H15orf61	DENND5A	CRABP2	ACO2	LOC100220645	LOC115496225	GAD1	PRUNE1	AP2A2	ACBD6	CLBA1	ACVR1	LOC115493571	IL17D	CNMD	HIC2	LOC115494994	LOC105758732	LOC115495530	LOC100223824	DUSP8	CTDSPL2	ANAPC11	HDDC2	CHST4	DAAM1	COQ3	AK8	LOC100231060	LOC115493739	LOC100228957	LOC115494862	LOC115498484	LOC100218258	MTBP	CALCR	BCR
EXOC6	DNAJA1	LOC116807450	AVL9	CNTN1	DYRK3	LOC116808907	LOC115491404	LOC115493381	LOC115497434	LOC100219113	LOC100232228	CAAP1	C18H17orf58	DHCR7	CSF1R	ACOT8	LOC100224495	LOC115496230	GHRH	RAB13	AP4E1	ACER2	CLMN	ACVR1C	LOC115493578	IL18R1	CNOT11	HIPK4	LOC115495071	LOC105758733	LOC115495531	LOC100225003	EEF1A2	CTXN1	ANGPTL7	HINT3	COPS4	DAAM2	COQ8A	AKR1D1	LOC100232370	LOC115494003	LOC100230391	LOC115495002	LOC116807028	LOC100223710	RIPK2	CAPN8	BEND6
EXOSC3	DNAJB8	LOC116807944	BLOC1S5	CPED1	FAM120A	LOC116808911	LOC115492367	LOC115493800	LOC116806737	LOC100220042	LOC105759005	CALM2	CAMKMT	DNAJC24	CSF2RB	ACP1	LOC100231824	LOC115496231	GPR1	S100A10	APOA1	ACOT12	CREB3L1	ADAM9	LOC115493837	KLHL1	CUL4A	IFFO1	LOC115495120	LOC105758737	LOC115495611	LOC100225005	ENO2	CYP2J40	ANO5	HSP90AB1	CRTC1	DDAH1	CPSF3	ALDH7A1	LOC100232594	LOC115495239	LOC100230797	LOC115495626	LOC116807034	LOC100226875	RMDN1	CAPSL	BIRC6
FAM149B1	DPYSL5	LOC116809167	BPHL	CPSF6	FAM162A	LOC116808919	LOC115493238	LOC115494554	LOC116809022	LOC100224870	LOC105759055	CCNE2	CAPN5	DTYMK	CSF3R	ACP2	LOC115494098	LOC115496234	HECW2	SELENBP1	AQP10	ACOT7	DCAF5	ADAMTS5	LOC115493863	LIG4	CYFIP1	IL22	LOC115495472	LOC105758756	LOC115495670	LOC100225968	EPB41L3	DGAT2	ANXA4	HTR1B	CSNK1A1	DENND3	CRYBG1	ALX4	LOC100232617	LOC115495455	LOC101234219	LOC115496080	LOC116807036	LOC100227840	RRM2B	CCDC112	BLOC1S3
FAS	ENDOD1	MIR92-1	C2H7orf25	CRADD	GDI2	LOC116808920	LOC115493351	LOC115495456	MLEC	LOC100227764	LOC115491612	CDC45	CARD11	ECT2	CTSB	ACTC1	LOC115496170	LOC115496238	HIBCH	SEMA6C	ARF3	ACOT9	DDB2	ADAMTS7	LOC115493871	LOC100218905	DEUP1	IPMK	LOC115495709	LOC105759265	LOC115495931	LOC100227823	FAM162B	DGKI	AOC1	IAH1	CXXC4	DENND4A	CUL9	AMH	LOC115492305	LOC115495984	LOC115494507	LOC115496081	LOC116807037	LOC105759120	TMEM64	CCDC43	BMP10
FBXL15	ERICH3	NR4A1	CAPN7	CREB3L2	GLI1	LOC116808924	LOC115493360	LOC115496951	MSI1	LOC100229613	LOC115492926	CDCA7	CASD1	FAM102A	CTSS	ACTL10	LOC115496189	LOC115496240	HOXD13	TMOD4	ARFIP2	ACSL3	DDX24	ADAMTSL3	LOC115493887	LOC100224083	DHRSX	LACTB	LOC115495937	LOC115492308	LOC116806807	LOC100231670	FAM83G	DHRS7C	AP2S1	IHH	CYCS	DGKQ	DDO	AMIGO3	LOC115495494	LOC115496928	LOC115496759	LOC115496569	LOC116807104	LOC115493623	TP53INP1	CCDC78	BPTF
FUT11	FAM13A	NR4A3	CCDC126	CRELD2	GOLGA4	LOC116808942	LOC115493402	LOC115498049	PISD	LOC101234217	LOC115493771	CHAC1	CBARP	FEN1	CTSZ	ACTR10	LOC115496192	LOC115496242	IBTK	UFC1	ARHGAP27	ACTR3B	DGKZ	ADGRG6	LOC115493902	LOC100230753	DIS3	LOC100217899	LOC115495997	LOC115492320	LOC116808444	LOC105759033	FBXO21	DNTT	APAF1	ITSN2	DCX	DIP2B	DDX43	AMOTL2	LOC115495882	LOC115498300	LOC115496796	LOC115497050	LOC116807113	LOC115493639	TRHR	CCL20	BRMS1L
GHITM	FAM174C	OTUD1	CCDC127	CRY1	GRK3	LOC116808945	LOC115493405	LOC116806634	RAB36	LOC105759289	LOC115493819	CHUK	CBX6	FRMPD1	DDN	ACTR5	LOC115496201	LOC115496246	IFNG	VPS45	ARHGAP36	ACTR6	DGLUCY	ADRM1	LOC115493909	LOC100231131	DUSP27	LOC100221700	LOC115496000	LOC115493935	LOC116808490	LOC115493786	FGF1	DPYD	APBB1	KCNE4	DNAJB11	DIXDC1	DSTN	ANAPC13	LOC115495946	LOC116806626	LOC115496798	LOC115497551	LOC116807192	LOC115493672	XKR4	CD164L2	BRWD1
GPRIN2	FAM8A1	PNN	CCNY	CTTNBP2	GTPBP3	LOC116809073	LOC115493415	LOC116807668	RNF185	LOC105759311	LOC115493820	CNEP1R1	CCDC158	FRY	DOCK8	ACTR8	LOC115496202	LOC115496247	ITGA4	VPS72	ARHGDIA	ACVR1B	DISP2	ADSS1	LOC115493911	LOC101233002	ECRG4	LOC100223684	LOC115496001	LOC115495131	LOC116808491	LOC115496936	FGF8	DRGX	APBB2	KCNF1	DNAJB6	DMD	DZANK1	ANGPT2	LOC115496118	LOC116806643	LOC115496851	LOC115497590	LOC116807269	LOC115493994		CD79B	BTAF1
GRIFIN	FGFR4	PTRH1	CCR9	CYREN	HSD17B10	LOC116809074	LOC115493416	LOC116807752	RNFT2	LOC115493874	LOC115493854	CNIH1	CCDC59	FTH1	DOK1	ACVR2B	LOC115496205	LOC115496254	ITGA6	ZNF687	ARHGDIG	ACVR2A	DLL4	AFF2	LOC115493926	LOC101234245	EPHA1	LOC100224089	LOC115496380	LOC115495266	LOC116808519	LOC115496960	FKBP1B	E2F1	APOOL	KCNK17	DOCK7	EIF4E3	E2F6	ANGPT4	LOC115496359	LOC116806730	LOC115496874	LOC116806778	LOC116807476	LOC115494259		CD82	BUB3
IDE	FNDC11	RHPN1	CDCP1	DEPDC4	HTT	LOC116809075	LOC115493438	MAPK11	RSPH14	LOC115495312	LOC115493869	CNPY1	CCM2L	GAL	EPSTI1	ACVRL1	LOC115496219	LOC115496956	ITPRID2		ARHGEF11	ADAD1	DNAJC5G	AFMID	LOC115493934	LOC115493359	EPHB6	LOC100228068	LOC115496382	LOC115495933	RGS6	LOC115496962	FRZB	EFCC1	ARF6	KCNS3	DOCK9	ELMO1	EML6	ANGPTL2	LOC115496458	LOC116806953	LOC115496886	LOC116806831	LOC116807685	LOC115494280		CDHR3	BUD23
KAZALD1	GK	SLC27A4	CDH12	DHTKD1	IBA57	LOC116809078	LOC115493504	MTERF2	SFI1	LOC115495313	LOC115493903	COIL	CCNO	GAS2	FCER1G	ADAL	LOC115496258	LOC116808639	KANSL1L		ARHGEF26	ADAM10	EAPP	AGTPBP1	LOC115493966	LOC115493868	ERLIN2	LOC100228990	LOC115496669	LOC115496752	RYR3	LOC115496982	GALR1	ELOVL2	ARHGAP28	KIF26B	EIF2B3	ELOVL1	EPB41L2	ANKRD44	LOC115496459	LOC116807108	LOC115496892	LOC116806849	METTL23	LOC115494329		CDHR4	C1H12orf57
KCNMA1	GPR180	SNN	CFAP69	DMC1	ICE1	LOC116809079	LOC115493513	NT5DC3	SIRT4	LOC115495334	LOC115493999	COL7A1	CD24	GRSF1	FGF2	ADAM8	LOC115496259	LOC116808659	KCNA3		ARL16	ADAM22	EGLN3	AIMP1	LOC115493976	LOC115494331	EXOSC8	LOC100232263	LOC115496721	LOC115496753	SAMD15	LOC115496984	GAP43	EMCN	ARL5A	KLHL31	EIF3H	ENDOV	EPM2A	ANTXR1	LOC115496468	LOC116807109	LOC115498565	LOC116808084	MIR203	LOC115494339		CDKN1A	C21H1orf174
KIF11	GPS1	SWI5	CHN2	DUS4L	IGSF6	LOC116809080	LOC115494335	NUP37	SMPD4	LOC115495335	LOC115494025	COLCA2	CDC123	HIPK3	FYB1	ADAMTS12	LOC115496267	MPV17L2	LOC100190105		ARL8A	ADAMTS20	ERG28	AIP	LOC115493984	LOC115494887	FBXL3	LOC100232623	LOC115497617	LOC115496763	SIVA1	LOC115497009	GATA2	ERBIN	ARL6IP1	LGALS8	EIF5	ENPP2	FAM184A	ANXA5	LOC115496722	LOC116807110	LOC116808828	LOC116808085	MRPL9	LOC115494352		CDX1	C2CD5
LDB3	GRAMD1C	U2SURP	CIDEA	EFCAB10	IL10RB	LOC116809084	LOC115495385	PAWR	SNRPD3	LOC115495340	LOC115494096	COMMD6	CDC7	HOXB4	GPR160	ADAMTS13	LOC115496914	MRPS14	LOC100217844		ARSA	ADAP1	EVL	AK7	LOC115493988	LOC115495011	FBXO40	LOC101233536	LOC115497728	LOC115496786	SLC9A3	LOC115497019	GATA5	ERMN	ARMC6	LIN28B	EXOSC7	EPAS1	FAM228B	ANXA6	LOC115496863	LOC116807131	LOC116808829	LOC116808145	MTCH1	LOC115494388		CEBPA	C2H18orf21
LOC100190507	GREM1	USP20	CLEC3B	ERGIC2	JUND	LOC116809151	LOC115495769	PLEKHA1	SRRM4	LOC115495440	LOC115495451	COX7A2	CEMIP2	IGHMBP2	GPR174	ADAMTS17	LOC115498372	PTPRC	LOC100220453		ATAT1	ADAP2	EXD2	ALDH2	LOC115494005	LOC115495129	GABRA5	LOC101234126	LOC115497751	LOC115496829	SPINT1	LOC115498248	GCH1	ESRRG	ARNT2	LOC100223132	FAM13C	EPB41L4A	FAM89A	APCDD1	LOC115496952	LOC116807134	LOC116808832	LOC116808205	MTFR1L	LOC115494393		CFAP73	CCDC186
LOC100217745	GTF2B		CMTM8	ETFBKMT	KDM3B	LOC116809228	LOC115495801	POLR3B	STX19	LOC115495490	LOC115495810	CPPED1	CHD1L	INS	GPR18	ADAMTSL1	LOC116807918	RNF2	LOC100220775		ATF4	ADARB1	FAM177A1	ALPK3	LOC115494139	LOC115495189	GAS6	LOC105758795	LOC115497767	LOC115496831	UBR1	LOC115498355	GFPT2	FABP2	ASAP2	LOC100223718	FANCF	EPHA4	FERMT1	APCDD1L	LOC115497747	LOC116807135	LOC116808855	LOC116808211	NDUFA11	LOC115494405		CHP1	CDC25A
LOC100218935	HACD1		CNDP2	EVX1	KDM5A	LOC116809324	LOC115495860	PPM1H	TPCN1	LOC115495496	LOC115496383	CRTAM	CHRNB3	INSC	GPR183	ADCY2	LOC116808098	RPL5	LOC100221395		ATG10	ADAT2	FAM180B	ALPL	LOC115494141	LOC115495868	GGACT	LOC105759169	LOC115498359	LOC115496836		LOC116807938	GOLGA2	FABP6	ASB8	LOC100225542	FGF6	EPHA5	FEZ2	APELA	LOC116808263	LOC116807138	MBTPS1	LOC116808230	NOP10	LOC115494529		CHRM3	CDC42BPA
LOC100220799	HOXC6		CPNE4	FGD6	KIAA1328	LOC116809325	LOC115497417	PTPRQ	TRIAP1	LOC115495498	LOC116806859	CSAD	CIAO1	IPO7	GPR34	ADCYAP1	LOC116808679	RTCA	LOC100222370		ATG4D	ADCK2	FAM181A	AMBRA1	LOC115494934	LOC115495893	GJB2	LOC105759524	LOC115498518	LOC115496882		LOC116808039	GOLGA7B	FBXL13	ASCC3	LOC101234090	FN3K	ERC1	FOXN2	API5	LOC116808787	LOC116807144	MEAK7	LOC116808582	PNPLA7	LOC115494571		CLDN10	CDK13
LOC100222268	IER5L		CREB5	FGF23	KIAA2026	LOC116809326	LOC115498555	RAB19	TSPAN7	LOC115495500	LOC116807820	CUL2	CNKSR1	IQCA1	GPR65	ADGRB2	LOC116808682	S1PR1	LOC100223333		ATP2B4	ADCY1	FBXO33	AMPD3	LOC115495557	LOC115496174	GLRA2	LOC105759971	LOC116807831	LOC115498513		LOC116808623	GPR142	GABPB1	ATG9B	LOC115491327	FRG1	ETNK1	GABRR1	APLN	LOC116809031	LOC116807146	MTHFSD	LOC116808586	PRDM10	LOC115494629		CLRN3	CEP135
LOC100223789	IFNGR2		DGKB	GALR3	KIF15	LRRC37B	LOC116806895	RELN	UNC119B	LOC115495519	LOC116807823	CYHR1	COG7	IRAG1	GTF2IRD1	ADGRF5	LOC116809184	SERPINC1	LOC100224567		ATP5IF1	ADCY6	FLRT2	ANAPC16	LOC116806766	LOC115496210	GPR143	LOC105760181	LOC116807960	LOC116807664		LOC116808863	GPR22	GADD45A	ATOH8	LOC115491666	GABARAPL2	ETV4	GALNT14	APLNR	MGAT4A	LOC116807169	NAT1	LOC116809280	PRDX4	LOC115494694		COCH	CEP192
LOC100225627	IFT140		DLX5	GCAT	KIF3B		LOC116807713	RFX4		LOC115495549	LOC116807890	CZH9orf40	COL17A1	KCNA4	IFI30	ADGRG1	LRRC42	SLC25A24	LOC100225224		ATRAID	ADCYAP1R1	FLVCR2	ANGPTL4	LOC116807699	LOC115496627	GPR83	LOC105760236	LOC116808067	LOC116808810		LOC116808871	GRIN2C	GALNT7	ATP1B4	LOC115492209	GLI3	FAHD1	GDF7	APP	MIPEP	LOC116807215	NUP93	MOCS1	PRPF38A	LOC115494700		CRABP1	CHD1
LOC100226673	IMMP1L		DNAH11	GSAP	KLHL7		LOC116807716	SERHL2		LOC115495562	LRRC6	DBF4	CPNE8	KCNQ1	IFI6	ADGRG3	MCOLN3	SLC44A3	LOC100228501		ATXN7L2	ADGRB3	FSIP1	ANKFN1	LOC116807853	LOC115496667	GRPR	LOC105760313	LOC116808440	LOC116808830		MUSTN1	GUCA1B	GALNTL6	ATP5MC1	LOC115494263	GNAI3	FAM168A	GJA10	AQP1	NEK5	LOC116807217	OGFOD1	NDUFA10	RBMX2	LOC115494720		CUBN	CHD4
LOC100229828	KARS1		DPH3	GTSE1	KNDC1		LOC116807746	SLC25A17		LOC115495581	MCM4	DCUN1D2	CRYBG3	KIAA1549L	IFIH1	ADGRV1	MED8	SNX7	LOC100229685		AVPI1	ADGRD1	GDF15	ANKRA2	LOC116807870	LOC115496764	GUCY2F	LOC105760330	LOC116808540	LOC116808839		NAA80	HAND2	GPATCH4	ATP5MG	LOC115494274	HCK	FBXO46	GLO1	ARAP3	NHS	LOC116807270	PLCG2	POFUT2	SRSF6	LOC115495181		DDX18	CHD6
LOC100231740	KIF24		DTNBP1	GUCY2C	LETM1		LOC116807748	SLC35E3		LOC115495582	METTL4	DEK	CUL4B	KIF18A	IL2RB	ADIPOR1	MIGA1	TRMT13	LOC100232284		B4GAT1	ADGRF4	GOLGA5	ANKRD10	LOC116807874	LOC115496806	HMGCL	LOC105760361	LOC116808593	LOC116808858		NOL8	HAO2	GPR158	ATP5PB	LOC115494275	HELZ2	FGL1	GNPAT	ARHGAP10	NIPA2	LOC116807271	PNP	PTCD1	STOML2	LOC115496445		DFFA	CHD7
LOC100232471	LEKR1		EEF1E1	HAL	LIX1L		LOC116808504	SMIM30		LOC115495624	MIR24	DHFR	DCUN1D3	KNL1	IL7R	ADM2	MPL	TRMT1L	LOC101233194		BAG3	ADIG	GPHN	ANKRD40	LOC116807884	LOC115496845	IL1R1	LOC105760732	LOC116808891	LOC116808861		NT5DC2	HDAC2	GPR3	ATP6V1F	LOC115494288	HNRNPD	GAB3	GRM1	ARHGAP25	NMUR2	LOC116807275	POLR2C	RBM44	STX8	LOC115496716		DHRS3	CHD9
LOC100232747	LMLN		EGFR	HDAC11	LOC100190483		LSMEM1	TRIM33		LOC115496765	MLX	DIPK1A	DCUN1D4	LOC100218771	IRF1	ADNP2	ODF2L	UCHL5	LOC105759421		BAHCC1	ADIPOQ	GSKIP	ANO10	LOC116807885	LOC115497143	INTS6	LOC115490866	LOC116808892	LPCAT2		PARP3	HMX1	GSX2	ATP9B	LOC115494295	HSPG2	GATA4	GTF2H5	ARHGEF17	NR0B1	LOC116807278	PPP1R3E	SLC25A47	TDRKH	LOC116808030		DNASE1L3	CLASP2
LOC100232794	LOC100190002		ELP4	HELB	LOC100220586		MET	WIF1		LOC115498301	MRPL15	DLD	DECR2	LOC100220137	IRF5	ADRA1A	ODR4	YTHDF2	LOC105759428		BBS7	ADORA3	GSTZ1	ANO6	LOC116807891	LOC115497827	ITFG2	LOC115491017	LOC116809138	MIR139		POLE3	HOXA1	GTF2A2	ATXN7L3	LOC115494310	IER3IP1	GLRX2	HAAO	ARHGEF6	OCA2	LOC116807279	SDR42E1	SLC2A9	TRAM1	LOC116808036		DPP4	CLDN25
LOC101233650	LOC100227325		EPB41L4B	IL26	LOC100221326		MICALL1			LOC116808474	MRPS28	DMWD	DGKE	LOC100221646	IRF8	ADRA1B	PAQR7		LOC115493650		BCHE	ADPRH	H3F3B	ANPEP	LOC116807893	LOC115498250	JADE3	LOC115491026	LOC116809145	MIR1729		PPM1M	HSD11B2	GYS2	B3GLCT	LOC115494316	IKZF4	GLS	HAO1	ARPC1B	PCCA	LOC116807280	SF3B3	SLC49A4	TRAP1	LOC116808040		ECM1	CLTA
LOC105759360	LOC105758589		EPDR1	INTS13	LOC100224150		MKRN1			LOC116808480	MTFR1	DPY19L1	DHX8	LOC100223864	ITGB2	ADTRP	PIGK		LOC115494074		BCKDK	ADPRM	HAUS2	ANTXR2	LOC116808780	LOC116806653	KATNAL1	LOC115491133	LRFN2	MLKL		RAD54L2	HSPD1	HDAC5	B4GALT2	LOC115494354	ILKAP	GRB2	HEY2	ARSG	PLCXD1	LOC116807282	SLC12A3	SRRD		LOC116808060		EFEMP1	CLTC
LOC105760408	LOC105758748		ESYT2	IQUB	LOC100226145		MON2			LOC116808484	MTRR	DTX3L	DRC1	LOC100223914	KCNJ2	AEBP2	RPAP2		LOC115494075		BHLHE23	ADPRS	HHIPL1	AOPEP	LOC116809064	LOC116807121	KEL	LOC115491236	MSL3	MMD2		SLC27A3	HSPE1	HEATR6	B4GALT3	LOC115494359	ISCA1	GTF3C5	ITGB1BP1	ASAP3	POGLUT2	LOC116807286	SLC6A2	VWC2L		LOC116808102		EFHB	CLTCL1
LOC115490947	LOC105760283		EZH2	KCNA5	LOC100226365		NELL2			LOC116808489	MTURN	DYNLL2	DYRK4	LOC100224235	KIFAP3	AFAP1L1	RTEL1		LOC115494158		BNIP3	ADRA1D	HR	AP1M1	LOC116809263	LOC116808068	KHDC4	LOC115491255	MSRB2	NUDT21		SPCS1	HTR1E	HIVEP3	BABAM1	LOC115494370	ISY1	HIF1A	KAT14	ASPHD2	PRPS2	LOC116807395	SLC7A6	WASHC1		LOC116808121		ELF3	CNBP
LOC115495577	LOC115491172		FAM221A	KIN	LOC100227837		NFAM1			LOC116808501	NFATC1	EIF1AX	E2F7	LOC100226232	KLHL6	AFF3	SPATA1		LOC115494740		BOLL	ADRA2A	IFTAP	AP1S1	LRATD2	LOC116808708	KL	LOC115491642	NT5DC1	OPN1SW		VGLL4	HTR2B	HPS5	BANP	LOC115494375	JAG1	IL17A	KIZ	ASPN	PUDP	LOC116807412	SLC7A6OS	WNT7A		LOC116808134		EPCAM	COL28A1
LOC115495725	LOC115491209		FBLN5	KRAS	LOC100232083		NR2C1			LOC116808517	NKAIN3	EIF3M	ECHDC3	LOC100227201	LAG3	AGAP3	ST6GALNAC5		LOC115495252		BORCS6	ADRB2	INF2	AP1S3	LRRC40	LOC116808789	KLF12	LOC115491677	NYAP2	PDPR		ZP1	ID2	HROB	BCAT1	LOC115494423	KANK4	IQGAP1	LAMP5	ATP5MD	RAB9A	LOC116807417	TRADD	YBEY		LOC116808135		ERBB3	COX6A1
LOC115495739	LOC115493492		FBXL7	KRR1	LOC101233484		NRCAM			MAPK8IP1	PAXBP1	EIF4EBP3	ECHS1	LOC100229562	LAPTM5	AGBL1	STXBP3		LOC115495665		BORCS8	AEN	INO80	AP5M1	LUZP2	LOC116808812	LCK	LOC115491679	PDGFRB	PLEKHG4			IFITM10	IDO2	BCL2L13	LOC115494499	KMT2E	ITGAV	LAPTM4A	ATP6AP1	RNF6	LOC116807418	ZDHHC7			LOC116808137		ETNK2	CPT1A
LOC115495752	LOC115493806		FOXQ1	LDHB	LOC115490825		PARVG			MOK	POP1	EME1	EDA	LOC100230622	LCP2	AGMAT	TCEANC2		LOC115495951		BRINP2	AFTPH	ITPKA	AQP11	MC5R	MBTPS2	LHX5	LOC115491683	PIK3R1	POP4			INSM1	KBTBD13	BCL7A	LOC115494570	LAMA2	JAK2	LCLAT1	ATP6V0A1	SAT1	LOC116807419	ZNF319			LOC116808139		EXOC3L4	CREBRF
LOC115495762	LOC115494287		FYCO1	LIN7A	LOC115493615		PDE6H			NKX2-1	PRELID3A	ERMP1	EGR3	LOC100231529	LFNG	AGO3	TRH		LOC115495953		C23H1orf216	AGAP2	JMJD7	ARCN1	MINDY4	MED17	LIMS1	LOC115491782	RHOH	PRMT7			INSM2	KCNH2	BCL7B	LOC115494610	LAMA5	JSRP1	LIN9	ATP6V1H	SLITRK5	LOC116807430				LOC116808142		F3	CRYBG2
LOC115495767	LOC115495378		GK5	LOC100217663	LOC115493779		PDZD11			PDE3B	RBFA	EWSR1	ELFN2	LOC100231625	LIME1	AGPAT2	TRNAR-UCU		LOC115495954		C28H19orf25	AGFG1	KCTD7	ARF4	MYF6	MFSD9	LIPT1	LOC115492298	SAMD4A	RANBP10			KCNA1	KCNK18	BFAR	LOC115494729	LAMB2	LCT	LOC100221422	B3GAT1	TFAP2E	LOC116807431				LOC116808156		FAM107A	DGKH
LOC115495768	LOC115495399		GMDS	LOC100217677	LOC115493852		PLBD1			PGAP4	SBSPON	EXOC1	ENAH	LOC100231722	LOC100217705	AGRP	TTC39A		LOC115495961		CACNB1	AGMO	KLC1	ARFGEF2	NBN	MIR383	LOC100189957	LOC115492299	SIGIRR	RBL2			KCNG1	KCNMB2	BLK	LOC115494732	LAMC1	LMO7	LOC100222956	BAK1	THSD1	LOC116807464				LOC116808158		FBXL22	DICER1
LOC115495784	LOC115495402		GMNN	LOC100220557	LOC116807502		PMPCB			PLEKHA7	SMCHD1	FAM114A1	EPHA2	LOC100231973	LOC100217943	AIFM3	VAMP4		LOC115495964		CACNG1	AGPAT3	LARGE2	ARFRP1	NIPAL2	MIR458	LOC100219283	LOC115492316	SLC28A3	RFWD3			KCNJ10	KLHL36	BMP7	LOC115494744	LAMP1	LOC100190325	LOC100227710	BASP1	TMEM182	LOC116807465				LOC116808165		FGL2	DMBT1
LOC115495794	LOC115495777		GPD1L	LOC100221865	LOC116807818		PYROXD1			PLEKHG3	TG	FAM155A	ERBB4	LOC100232483	LOC100218402	AK4	VIT2		LOC115495966		CAMK2N2	AGPAT4	LBHD2	ARG2	NOBOX	MPHOSPH8	LOC100219809	LOC115492324	SOX5	SIAH1			KCNMB4	LAMP3	BOLA3	LOC116806631	LAMTOR3	LOC100218804	LOC100227822	BBS9	TMEM47	LOC116807466				LOC116809177		FOXA1	DMXL1
LOC115495804	LOC115496050		GPLD1	LOC100224131	LOC116808031		RGSL1			PRG2	THUMPD3	FAM193B	ERI1	LOC105759274	LOC100218724	AKAP1	WDR47		LOC115495972		CAP1	AGTR2	LDLRAP1	ARGLU1	NOL4	MRPL44	LOC100221245	LOC115492370	SUMF2	SLC38A7			KCNRG	LECT2	BRI3	LOC116807137	LOC100219794	LOC100220118	LOC100228263	BCL2	TMEM8B	LOC116807467				LPIN1		FOXC1	DNAH10
LOC115495805	LOC115496371		GPR139	LOC100224299	LOC116808715		RIC8B			PRORP	TRAPPC8	FBXL20	FAM199X	LOC105759305	LOC100221351	AKAP10	WDR63		LOC115495979		CARS1	AGTRAP	LOC100217673	ARHGAP17	NPBWR1	MRPL48	LOC100221679	LOC115492426	TM4SF1	TCF7			KCTD4	LGI2	BRK1	LOC116808019	LOC100220010	LOC100221794	LOC100228466	BDH2	TRIM13	LOC116807510				LYRM2		FOXO3	DOCK5
LOC115495806	LOC115497191		GRB14	LOC100224455	LOC116808951		SYT10			RPS6KL1	TRNAL-CAG_2	FFAR4	FAM217B	LOC105759308	LOC100222960	AKAP13			LOC115495985		CASTOR1	AGXT	LOC100218133	ARHGAP23	NPC1	MTRF1	LOC100224866	LOC115492433	TMC2	TDRD12			KIF21A	LIN54	BROX	LOC116808026	LOC100221413	LOC100223458	LOC100231535	BMP1	UNC50	LOC116807516				METTL24		FRK	DOHH
LOC115495816	LOC115497554		HDAC9	LOC100224928	LPIN2		TAB1			SERPINA10	TRNAY-GUA_6	FGF18	FAM234B	LOC105760050	LOC100223311	AKAP17A			LOC115495987		CBWD1	AHCTF1	LOC100219136	ARHGAP31	NTAQ1	NHLRC3	LOC100226358	LOC115492454	XPO4	TENT4B			KIF5C	LOC100219014	BSCL2	LOC116808027	LOC100222344	LOC100224576	LOC100232580	BMP4	USPL1	LOC116807537				MOXD1		FRMPD2	DOP1B
LOC115495822	LOC115498363		IGFBP1	LOC100225263	LRRC59		TAFA2			SLC10A1		FKBP6	FAM81A	LOC115490544	LOC100223480	AKAP7			LOC115495999		CDC26	AHCY	LOC100222906	ARHGDIB	NUDCD1	NIPA1	LOC100226894	LOC115492477	ZNF451	TOX3			LIN28A	LOC100220430	BTBD18	LOC116808043	LOC100223531	LOC100227890	LOC100232689	BMP6	VWA3B	LOC116807546				MSH5		FYB2	DST
LOC115495851	LOC116806824		IGFBP3	LOC100225312	LUZP1		TMEM121			TP53I11		FLII	FBXO30	LOC115490595	LOC100223649	ALDH4A1			LOC115496003		CDC42SE1	AHSA1	LOC100224854	ARHGEF12	PAG1	NIT2	LOC100228216	LOC115492509	ZPLD1	TRNAP-CGG			LOC100218598	LOC100220738	BTK	LOC116808105	LOC100223925	LOC100229350	LOC101233662	BOC		LOC116807547				NCOA7		GABRD	DTNA
LOC115495857	LOC116807075		INO80C	LOC100225408	MAP3K2		TMEM140			TSPAN32		FNDC5	FEZF2	LOC115492408	LOC100225149	ALK			LOC115496004		CDC6	AHSA2P	LOC100224867	ARIH1	POLR2K	NPAS2	LOC100228280	LOC115492554		TRNAY-GUA_1			LOC100222004	LOC100221863	C14H7orf26	LOC116808149	LOC100225609	LOC100230245	LOC101233698	BSG		LOC116807548				NEIL2		GAS2L2	DYNC1H1
LOC115495859	LOC116807453		KAT2B	LOC100228774	MCAM		TOM1			WDR25		FNTA	FGF19	LOC115493680	LOC100225774	ALKBH1			LOC115496007		CDK2	AIDA	LOC100226671	ARL2BP	PPP1R26	OFD1	LOC100228799	LOC115492555		TRPM8			LOC100223270	LOC100221986	C17H9orf116	LOC116808160	LOC100227476	LOC101233247	LOC105759473	BST1		LOC116807555				OGFRL1		GC	ECD
LOC115495863	LOC116807950		KBTBD2	LOC100229276	MCPH1		TRNAA-AGC_4			ZFYVE19		FRRS1L	FOXC2	LOC115493682	LOC100226089	ALKBH3			LOC115496022		CDK3	AIFM2	LOC100226679	ARL4C	PPP1R42	PANX1	LOC100228861	LOC115492613		TSHZ3			LOC100225407	LOC100224093	C1GALT1	LOC116808167	LOC100228523	LOC101233427	LOC115490650	BTBD3		LOC116807556				PINX1		GIPC2	EIF2S2
LOC115495871	LOC116808711		KCNH8	LOC100230452	MDH1B		TSPAN12					GATA1	FOXO6	LOC115494334	LOC100226157	ALS2			LOC115496055		CDK5	AK6	LOC100226769	ARL6	RIMS2	PARP8	LOC101233542	LOC115492614		URI1			LOC100228221	LOC100224401	C1H3orf38	LOC116808173	LOC100229057	LOC115490975	LOC115494034	BTC		LOC116807560				PKIB		GJB1	EIF3A
LOC115496133	LOC116808946		KIAA1217	LOC100231669	MFAP2		TWF1					GCC2	FRS2	LOC115495016	LOC100226213	AMACR			LOC115496062		CDK5R1	AK9	LOC100226788	ARMH3	RSPO2	PCGF1	LOC101233700	LOC115492653		VAC14			LOC100230293	LOC100225970	C22H2orf68	LOC116808453	LOC100229435	LOC115491486	LOC115494308	C1AH12orf75		LOC116807598				POLR1C		GPRC5C	EP300
LOC115497321	LOC116809032		KIF13A	LOC101234202	MICAL3		WEE2					GCGR	GADD45B	LOC115495138	LOC100227488	AMER3			LOC115496213		CDT1	AKR1A1	LOC100232496	ARPC4	SLC12A7	PHEX	LOC105758645	LOC115492946		VSTM2B			LOC101232941	LOC100226082	C22H8orf58	LOC116808803	LOC100229802	LOC115491520	LOC115494311	C1QL1		LOC116807600				RARS2		GPX2	EP400
LOC116807837	LOC751995		KIF5B	LOC105758560	MPP6							GLT8D1	GAN	LOC115495343	LOC100228345	AMHR2			LOC115497933		CELF3	AKT1	LOC101233140	ARRDC2	SNTB1	PPEF1	LOC115491158	LOC115493125		ZCCHC9			LOC101234162	LOC100226294	C23H1orf232	LRPPRC	LOC100230361	LOC115492396	LOC115494344	C1QTNF1		LOC116807602				RNASEH1		GRB7	ERN1
LOC116808157	MAB21L3		KRIT1	LOC105758588	MRPS9							GNAI1	GATC	LOC115495344	LOC100229421	AMZ1			LOC116807082		CENPF	AKT3	LOC101233692	ARSI	SPIDR	PRSS2	LOC115492431	LOC115493213		ZNF423			LOC115490683	LOC100226434	C25H1orf189	LTV1	LOC100230612	LOC115492659	LOC115494353	C1QTNF5		LOC116807603				RNGTT		HADH	FANCA
LOC116808227	MED27		LANCL2	LOC105758592	NCBP3							GPN1	GGA2	LOC115495346	LOC100231144	ANAPC10			LOC116807669		CENPI	ALCAM	LOC101234101	ARSJ	ST18	QTRT2	LOC115493173	LOC115493224					LOC115490879	LOC100226560	C4H20orf27	MAP10	LOC100231303	LOC115493263	LOC115494382	C1QTNF7		LOC116807604				SCRG1		HGD	FASN
LOC116808541	MORN5		LARS2	LOC105758604	NDEL1							HAUS8	GMCL1	LOC115495350	LOC100231469	ANGEL2			LOC116808595		CFAP206	ALDH1A2	LOC101234143	ARTN	STAB2	RAB30	LOC115494151	LOC115493225					LOC115490905	LOC100227272	CA8	MCM9	LOC105759512	LOC115493465	LOC115494389	C20H20orf204		LOC116807606				SFT2D1		HGFAC	FAT1
LOC116808555	MTMR4		LMX1B	LOC105760490	NETO1							HDHD2	GNA13	LOC115495359	LOC100231797	ANGPTL1			LOC116808597		CHCHD10	ALDH1A3	LOC105758906	ARVCF	TBC1D31	RFX8	LOC115494350	LOC115493372					LOC115490941	LOC100227477	CABLES2	MIR7-1	LOC115490813	LOC115493542	LOC115494394	C20H20orf85		LOC116807608				SLC16A10		HNF1B	FAT3
LOC116808561	MTX3		LOC100190123	LOC115490609	NIFK							HELLS	GPR89B	LOC115495360	LOC100232117	ANK1			LOC116808598		CHEK1	ALDOC	LOC105759325	ASAH1	TMEM65	RGCC	LOC115494647	LOC115493508					LOC115491117	LOC100230362	CACNA2D3	MRPS10	LOC115490936	LOC115493671	LOC115494425	C2CD3		LOC116807625				SLC22A2		HNF4A	FKBP14
LOC116808563	NCF2		LOC100190505	LOC115490698	NPTXR							HMGB1	GPRC6A	LOC115495395	LOC101232863	ANKDD1A			LOC116808609		CIART	ALG1	LOC115492425	ASB6	TMEM74	RNF149	LOC115494683	LOC115493598					LOC115491163	LOC100230782	CACTIN	MTRF1L	LOC115490942	LOC115494330	LOC115494443	C3H1orf115		LOC116807694				SMPDL3A		HOGA1	FLNB
LOC116808577	NDUFS4		LOC100190610	LOC115490768	NR5A1							HMGB2	GRHL2	LOC115495396	LOC101233188	ANKK1			LOC116808610		CKAP2	ALG12	LOC115492999	ASF1A	TRNAR-ACG_1	SCN4A	LOC115494939	LOC115493776					LOC115491658	LOC101233947	CADM1	MYO6	LOC115490986	LOC115494338	LOC115494444	C5H11orf96		LOC116807901				SNTG2		HOXA2	FNBP1L
LOC116808778	NECAP1		LOC100190710	LOC115490799	NSMAF							HNRNPA2B1	HAUS3	LOC115495406	LOC101233381	ANKRD1			LOC116808612		CLCF1	ALG14	LOC115493418	ASH2L	TRNAY-GUA_8	SH3BGRL	LOC115495013	LOC115494023					LOC115492695	LOC105758928	CALR	NR2E1	LOC115491041	LOC115494975	LOC115494445	C5H14orf180		LOC116808090				SNX14		HOXA3	FREM1
LOC116809010	NEPRO		LOC100219050	LOC115490906	OSGIN2							HNRNPAB	HID1	LOC115495431	LOC101233409	ANKRD12			LOC116808613		CLEC16A	ALG5	LOC115493791	ASPDH	TTPA	SH3KBP1	LOC115495118	LOC115494282					LOC115493872	LOC105759242	CAND1	NUP133	LOC115491517	LOC115495892	LOC115494461	C7		LOC116809180				SPRTN		HOXA4	GARRE1
LRIT1	NMNAT3		LOC100219164	LOC115490931	P3H4							HNRNPLL	HPS3	LOC115495432	LOC101233451	ANKRD13B			LOC116808621		CLK2	ALG9	LOC115494682	ASPSCR1	TUBD1	SHISA2	LOC115495302	LOC115494450					LOC115493930	LOC105759312	CAPN15	OLIG3	LOC115492322	LOC115496031	LOC115494463	C9H17orf50		LOC116809185				STXBP5		HOXA5	GCN1
LRIT2	NOLC1		LOC100219425	LOC115490959	PBRM1							HPSE2	HS3ST4	LOC115495433	LOC101233626	ANKRD13C			LOC116808632		CLU	ALKAL1	LOC115495314	ASTN1	UTP23	SLC25A30	LOC115495315	LOC115494457					LOC115493960	LOC105759942	CAPZA2	OPN3	LOC115492340	LOC115496032	LOC115494469	CALD1		LOC116809192				SUMF1		HOXB8	GOLGB1
MFSD13A	NR2E3		LOC100219651	LOC115490996	PCBP4							HSD17B4	HSPA2	LOC115495446	LOC105758892	ANKRD24			LOC116809156		COL9A2	ALKBH2	LOC115495317	ATAD1	WASHC5	SLC25A6	LOC115495756	LOC115494481					LOC115493986	LOC115490604	CASC3	OPRM1	LOC115493013	LOC115496122	LOC115494470	CAPN6		MIR1781				TFAP2D		HOXD4	GOLM2
MMS19	NRDC		LOC100220976	LOC115491029	PCM1							HTR1A	HTATSF1	LOC115495450	LOC105759147	ANKRD29			LRP2		COMMD7	ALKBH4	LOC115495437	ATG5	XKR9	SLC5A7	LOC115495758	LOC115494624					LOC115494091	LOC115490750	CBX3	PACC1	LOC115493097	LOC115496334	LOC115494473	CARNMT1		NIPSNAP1				TMEM242		HOXD8	GPATCH8
MRPL43	NT5C3A		LOC100223004	LOC115491139	PCP4							HVCN1	HTRA1	LOC115495453	LOC105759805	ANKRD33			MAP3K19		CORO1B	ALPK1	LOC115495486	ATG7		SLITRK1	LOC115495779	LOC115494690					LOC115494645	LOC115490997	CCAR1	PACRG	LOC115493826	LOC115496354	LOC115494476	CAVIN2		NR4A2				TPD52L1		HOXD9	GPX4
MSRA	ODF1		LOC100225060	LOC115491222	PDE7A							IL18BP	ICA1	LOC115495460	LOC105760522	ANKRD34C			MCM6		CPSF7	ALS2CL	LOC115495502	ATOH7		SPTSSB	LOC115495798	LOC115494718					LOC115494913	LOC115491008	CCDC103	PCYT1A	LOC115493842	LOC115496376	LOC115494486	CCBE1		OSBP2				TRAF5		HS3ST1	GREB1L
MYOF	OTUD7A		LOC100225865	LOC115491386	PER2							ING3	IGSF21	LOC115495462	LOC105760649	ANKRD35			METTL21A		CREBL2	ALX1	LOC115495514	ATP10A		ST6GAL2	LOC115495896	LOC115494741					LOC115494920	LOC115491052	CCDC107	PHF10	LOC115494535	LOC115496555	LOC115494488	CCDC102A		POC1A				TRAPPC12		IL10	GTF3C1
NANOS1	OVOL1		LOC100226474	LOC115492617	PIK3R4							INPP5A	IKZF2	LOC115495466	LOC115490883	ANKRD37			METTL5		CRELD1	AMBP	LOC115495517	ATP11C		STARD13	LOC115496053	LOC115494788					LOC115494981	LOC115491059	CCDC124	POPDC3	LOC115494712	LOC115497015	LOC115494490	CCDC3		PRLH				UTRN		IL22RA1	GUCY1A2
NAPEPLD	PARVB		LOC100228369	LOC115493361	PIM1							IQGAP3	INPP5B	LOC115495470	LOC115490894	ANKRD52			MFSD6		CRTC2	AMD1	LOC115495520	ATP23		TBC1D8	LOC115496087	LOC115494895					LOC115495085	LOC115491096	CCDC171	PPP4R3B	LOC115494983	LOC115497124	LOC115494494	CCDC80		SLC25A33				WASF1		IQGAP2	HDAC7
NRAP	PDCD6		LOC100229225	LOC115493367	PNPLA8							ITK	KBTBD11	LOC115495473	LOC115491050	ANKRD55			MORF4L1		CRYAA	AMDHD2	LOC115495523	ATP4B		TCEANC	LOC115496204	LOC115494976					LOC115495968	LOC115491165	CCKBR	PRIM2	LOC115495054	LOC115497245	LOC115494495	CCN4		SPATA48				ZBTB24		IRX2	HEATR5A
NRBF2	PELO		LOC100229701	LOC115493368	PPIA							JMJD4	KBTBD8	LOC115495476	LOC115491083	ANO3			MRAS		CSE1L	AMER1	LOC115495529	ATP5F1C		TEX30	LOC115496239	LOC115495026					LOC115496343	LOC115491179	CCM2	RAB4A	LOC115495056	LOC115497614	LOC115494521	CCN5		SPRED2						IRX5	HECTD4
NRG3	PEX6		LOC100230122	LOC115493374	PPP2R3B							KCNJ6	KCTD2	LOC115495479	LOC115491116	ANO9			MTX2		CSK	AMMECR1	LOC115495533	ATP6V0D1		TRAPPC2	LOC115496344	LOC115495028					LOC115496575	LOC115491184	CCR10	RBM34	LOC115495186	LOC115497934	LOC115494608	CCNF		SPSB1						ITGB4	HELZ
OGDHL	PNPT1		LOC100231496	LOC115493377	PPP6R3							KDM2A	KIAA0895	LOC115495489	LOC115491526	ANXA2			MYO3B		CSTF1	AMOTL1	LOC115495546	ATP6V1C1		TRNAG-GCC_1	LOC115496389	LOC115495185					LOC115496852	LOC115491195	CD320	RHOU	LOC115495202	LOC115497959	LOC115494617	CCNG1		SS18L2						JCHAIN	HERC1
OPN4	POLDIP2		LOC100231534	LOC115493385	PTGR1							KLHL8	KRTCAP2	LOC115495491	LOC115492234	ANXA7			NCKAP5		CSTF2	AMPD1	LOC115495555	ATP8A2		UGGT2	LOC115496460	LOC115495247					LOC115496971	LOC115491203	CDCA8	RIMS1	LOC115495381	LOC115498006	LOC115494619	CD93		STX1A						KCNJ15	HERC2
PAPSS2	PPRC1		LOC100231554	LOC115493389	PTPN4							LBR	KTN1	LOC115495493	LOC115493216	AP3M2			NDUFS1		CTNND1	ANAPC2	LOC115495559	ATXN3		VTCN1	LOC115496534	LOC115495373					LOC115497112	LOC115491271	CDH2	RPF2	LOC115495560	LOC115498098	LOC115494636	CDC42EP1		WDSUB1						KCNJ16	HIPK1
PDCD11	QRICH1		LOC100231622	LOC115493397	RAB6A							LCORL	LACC1	LOC115495594	LOC115493243	AP3S1			NIF3L1		CTSA	ANAPC7	LOC115495561	AUP1		ZC3H13	LOC115496545	LOC115495384					LOC115497348	LOC115491312	CDK10	SCML4	LOC115495711	LOC115498337	LOC115494640	CDH11		YIPF5						KIF16B	HUWE1
PKD2L1	RAB11B		LOC101233154	LOC115493408	RBM12B							LOC100190355	LARP6	LOC115495659	LOC115493244	AP3S2			NRAS		CTSD	ANGPTL3	LOC115495570	AURKAIP1			LOC115496551	LOC115495693					LOC115497615	LOC115491422	CDK2AP2	SERAC1	LOC115495749	LOC116806669	LOC115494710	CDH5		ZBTB42						KRT18	IGF2R
POLL	RAB18		LOC101234087	LOC115493429	RECQL5							LOC100190722	LBX2	LOC115495663	LOC115493268	AP5Z1			NXPH2		CUEDC1	ANK2	LOC115495571	AXIN2			LOC115496564	LOC115495837					LOC115497625	LOC115491552	CENPS	SLC17A5	LOC115496038	LOC116806682	LOC115494739	CDKN1B								KY	ITPR2
POLR3A	RIOK1		LOC105758975	LOC115493430	RETREG1							LOC100218864	LMNB1	LOC115495664	LOC115493272	APBA3			ORMDL1		DAO	ANK3	LOC115495576	B3GALNT1			LOC115496760	LOC115495939					LOC116806647	LOC115491606	CEP41	SLC18B1	LOC115496361	LOC116807160	LOC115494749	CDS2								KYNU	JARID2
PPIF	RNF220		LOC105758980	LOC115493431	RFX3							LOC100219000	LOC100190410	LOC115495685	LOC115493497	APBB1IP			OSGEPL1		DBX1	ANKH	LOC115495578	B3GALT6			LOC115496792	LOC115496313					LOC116806749	LOC115491841	CERS3	SLC29A1	LOC115496384	LOC116807749	LOC115494757	CEBPD								LEAP2	KDELR2
PSD	RSPH3		LOC105758985	LOC115493434	RIC1							LOC100219141	LOC100217539	LOC115495687	LOC115493720	APLF			PDE6G		DCP1A	ANKRD16	LOC115495580	B3GNT7			LOC115496804	LOC115496321					LOC116806840	LOC115491909	CFAP20	SLC66A3	LOC115496388	LOC116807952	LOC115494782	CENPC								LGSN	KDM6A
PYROXD2	SLC30A6		LOC115493557	LOC115493436	RIPOR1							LOC100219985	LOC100217786	LOC115495691	LOC115493781	APLP2			POU6F1		DDX28	ANKRD2	LOC115495588	B4GALT1			LOC115496843	LOC115496364					LOC116807133	LOC115492405	CFL2	SOD2	LOC115496443	LOC116808051	LOC115495033	CERCAM								LIMD2	KIAA1958
R3HCC1L	SUCLA2		LOC115493618	LOC115493437	RNF10							LOC100221139	LOC100217789	LOC115495697	LOC115495219	AQP2			PRDM12		DEF8	ANKRD22	LOC115495591	B4GALT5			LOC115496994	LOC115496647					LOC116807520	LOC115492495	CGAS	SSTR4	LOC115496461	LOC116808052	LOC115495267	CGRRF1								LIPC	KIF13B
RASGEF1A	SUSD3		LOC115493628	LOC115493449	RNF24							LOC100221664	LOC100218628	LOC115495869	LOC115495227	AREG			PSMD14		DENND2D	ANKRD28	LOC115495597	BAG4			LOC115497018	LOC115496860					LOC116807644	LOC115492610	CHCHD2	SUPT3H	LOC115496464	LOC116808054	LOC115497163	CHST15								LIPI	KMT2A
RBP3	SYNC		LOC115493645	LOC115493452	RORA							LOC100222418	LOC100221517	LOC115496754	LOC115495436	ARF1			RCC1L		DGUOK	ANKRD31	LOC115495603	BAIAP2L1			LOC115497343	LOC115496898					LOC116807659	LOC115493033	CHIC1	TAAR1	LOC115496638	LOC116808075	LOC116808016	CHST3								LMO2	KMT2C
RPS24	TCAIM		LOC115493649	LOC115493453	RREB1							LOC100223162	LOC100221786	LOC115496840	LOC115495595	ARFGAP1			RFTN2		DHX57	ANKRD34B	LOC115495605	BAMBI			LOC115497765	LOC115496967					LOC116808116	LOC115493373	CHRNB2	TBC1D32	LOC115496654	LOC116808112	LOC116808028	CILP								LOC100190094	KMT2D
RRP12	TCTEX1D2		LOC115493655	LOC115493454	SAP18							LOC100223254	LOC100224883	LOC115496998	LOC115495633	ARFGAP3			RHOD		DHX58	ANKRD50	LOC115495610	BARX1			LOC115497795	LOC115497071					LOC116808190	LOC115493404	CIR1	THADA	LOC115496661	LOC116808218	LOC116808032	CILP2								LOC100190135	KPNA1
RTKN2	TENT5C		LOC115493660	LOC115493531	SCAMP3							LOC100223512	LOC100226706	LOC115498074	LOC115496084	ARFIP1			SCN2A		DHX9	ANKS3	LOC115495615	BBS4			LOC116806825	LOC115497127					LOC116808441	LOC115493458	CIZ1	TINAG	LOC115496789	LOC116808225	LOC116808034	CKB								LOC100217703	L3HYPDH
SEC31B	TEX36		LOC115493673	LOC115493540	SCGN							LOC100224270	LOC100226718	LOC116806622	LOC115496342	ARHGAP19			SCTR		DIRAS1	ANKZF1	LOC115495623	BCL2L1			LOC116807822	LOC115497266					LOC116808841	LOC115493462	CKS1B	TMEM181	LOC115497090	LOC116808241	LOC116808059	CKS2								LOC100217735	LARP1
SESN2	THRA		LOC115493679	LOC115495387	SCN2B							LOC100225043	LOC100226756	LOC116806826	LOC115496431	ARHGAP39			SESTD1		DIRAS3	ANP32A	LOC115495627	BCL6			LOC116808081	LOC115497371					LOC116808940	LOC115493475	CLDN12	TRAPPC3L	LOC115497118	LOC116808271	LOC116808069	CLCNKA								LOC100218674	LIMD1
SFR1	TMEM167B		LOC115493683	LOC115495598	SECISBP2L							LOC100225836	LOC100226903	LOC116807478	LOC115496483	ARHGAP5			SLC12A9		DNMT3A	ANP32E	LOC115495649	BEND7			LOC116808267	LOC115497419					LOC116809003	LOC115493478	CLK3	TRDN	LOC115497239	LOC116808580	LOC116808078	CLGN								LOC100218703	LOC100190416
SH2D4B	TMEM81		LOC115493693	LOC115496047	SGSH							LOC100226070	LOC100230541	LOC116807666	LOC115496866	ARHGEF10			SLC25A12		DOLPP1	ANTKMT	LOC115495650	BET1			LOC116808483	LOC115497452					LOC116809114	LOC115493490	CLN6	TRIP13	LOC115497247	LOC116808900	LOC116808133	CLMP								LOC100218751	LOC100218173
SHLD2	TSPAN13		LOC115493694	LOC115497432	SHOC1							LOC100226437	LOC100230766	LOC116807763	LOC115496888	ARHGEF16			SLC40A1		DPP8	ANXA10	LOC115495895	BHLHA15			LOC116808585	LOC115497538					LOC116809223	LOC115493509	CLN8	TTC32	LOC115497307	LOC116809176	LOC116808161	CMKLR1								LOC100219012	LOC100218227
SLC25A22	TUBB		LOC115493700	LOC115497829	SLF2							LOC100226912	LOC100231025	LOC116807869	LOC115497448	ARHGEF2			SLC4A10		DQX1	AP1AR	LOC115496089	BHLHA9			LOC116808603	LOC115497548					MAT1A	LOC115493535	CLPP	TUBE1	LOC115497396	LOC116809260	LOC116808174	CNN1								LOC100219265	LOC100219261
SLC35G1	UBE2D2		LOC115493702	LOC115498364	SMARCA1							LOC100227529	LOC100232295	LOC116808451	LOC115497720	ARHGEF28			SLC51B		DUSP26	AP2B1	LOC115497240	BID			LOC116808786	LOC115497566					MC2R	LOC115493539	CLSTN2	UBXN2A	LOC115498361	LOC116809270	LOC116808176	CNTFR								LOC100220024	LOC100221534
SORBS1	UBE2W		LOC115493703	LOC115498392	SPATA13							LOC100228968	LOC101233739	LOC116808455	LOC115497866	ARHGEF3			SMARCC1		E4F1	AP3B2	LOC115497282	BIN3			LOC116808949	LOC115497579					MC3R	LOC115493541	CNKSR3	URB2	LOC115498514	LRCH1	LOC116808696	COL12A1								LOC100220197	LOC100221862
SORCS1	USP38		LOC115493704	LOC115498505	SPEF2							LOC100229431	LOC105758775	LOC116808456	LOC115498190	ARHGEF33			SPC25		ECHDC2	AP3D1	LOC115497405	BLCAP			LOC116808996	LOC115497624					MGARP	LOC115493600	CNNM2	USP45	LOC116806668	LRFN1	LOC116809257	COL14A1								LOC100220507	LOC100223640
STAMBPL1	WBP2NL		LOC115493710	LOC116807087	SYTL4							LOC100229852	LOC105759170	LOC116808457	LOC115498329	ARHGEF37			STAT1		ECSIT	APBA2	LOC116808447	BMERB1			LOC116809053	LOC115497679					MLLT11	LOC115493736	CNOT9	WIPI2	LOC116806732	LTK	LRP11	COL15A1								LOC100220756	LOC100224236
STN1	WDR34		LOC115493713	LOC116807268	TAF1C							LOC100230937	LOC105760147	LOC116808459	LOC115498496	ARHGEF39			STK17B		EFNA1	APOA4	LOC116808448	BMF			LOC116809121	LOC115497698					MLPH	LOC115493763	CNPY2	XKR5	LOC116806786	M1AP	MAP3K5	COL16A1								LOC100222314	LOC100224318
SUFU	WDR82		LOC115493717	LOC116807697	TASOR							LOC100231703	LOC115490530	LOC116808464	LOC116807069	ARID3C			STRADB		EFNA2	APOD	LOC116808478	BMPER			LOC116809124	LOC115497909					NADK2	LOC115493919	COG2	ZC3H12D	LOC116807010	MAML2	MAP7	COL18A1								LOC100222323	LOC100225918
SYNPO2L	ZNF706		LOC115493722	LOC116807703	TEF							LOC100232751	LOC115490593	LOC116808467	LOC116807179	ARID4A			SUMO1		EGF	APRT	LOC116808482	BMPR1B			LOC116809152	LOC115498013					NEFM	LOC115493958	COLQ		LOC116807081	MAN2A1	MATN3	COL1A1								LOC100222345	LOC100226104
TFDP2			LOC115493723	LOC116807708	TENM4							LOC101233915	LOC115490606	LOC116808468	LOC116807219	ARL1			TMEM163		EHF	APTX	LOC116808486	BMT2			LOC116809308	LOC115498034					NGFR	LOC115493997	COMMD9		LOC116807539	MAP3K1	MDGA1	COL1A2								LOC100222749	LOC100229898
TLL2			LOC115493724	LOC116807719	TEX11							LOC101234247	LOC115490860	LOC116808472	LOC116807230	ARL14EPL			TMEM177		EIF4EBP1	AQP4	LOC116808487	BNIP1			LRRC23	LOC115498313					NHLH2	LOC115494024	COPA		LOC116807605	MCRIP1	MED23	COL20A1								LOC100223070	LOC100230674
TLX1			LOC115493744	LOC116807723	TFCP2L1							LOC105758771	LOC115490877	LOC116808475	LOC116807232	ARL15			TMEM237		EIF4EBP2	ARAP1	LOC116808488	BORCS7			LYG2	LOC115498519					NPAS4	LOC115494104	COPE		LOC116807632	MDFIC	MIR125-2	COL3A1								LOC100223328	LOC100231121
TUBGCP2			LOC115493745	LOC116807736	THYN1							LOC105758920	LOC115490891	LOC116808477	LOC116808646	ARL6IP4			TYW5		EIF4G2	ARAP2	LOC116808499	BRAT1			MBNL3	LOC115498543					NPY	LOC115494143	COPZ1		LOC116807657	MEGF10	MMS22L	COL4A1								LOC100223335	LOC100231911
VSTM4			LOC115493749	LOC116807738	TMCC1							LOC105759056	LOC115491288	LOC116808524	LOC116808978	ARMC10					EIF5A2	ARHGAP24	LOC116808500	BRD3OS			ME3	LOC116806614					NRN1	LOC115494251	COQ10A		LOC116807691	MIDEAS	MMUT	COL4A2								LOC100223619	LOC100231934
WASHC2C			LOC115493753	LOC116807739	TMEM131							LOC115490881	LOC115491296	LOC116808959	LOC116809122	ARMH4					ELAVL4	ARHGAP26	LOC116808502	BSDC1			MGST2	LOC116806630					NTRK1	LOC115494260	CPLANE2		LOC116808192	MINDY2	MSGN1	COL4A3								LOC100224630	LOC100231949
WBP1L			LOC115493760	LOC116807747	TMEM241							LOC115490904	LOC115492399	LPXN	LOC116809123	ARPP19					EMB	ARHGAP40	LOC116808515	BSND			MICU2	LOC116806723					OGFR	LOC115494318	CPN1		LOC116808224	MON1A	MSH2	COL4A4								LOC100225196	LOC115490917
WDFY4			LOC115493769	LOC116807753	TOR4A							LOC115491033	LOC115493420	LRRC57	LOC116809181	ARRB1					EMG1	ARHGAP42	LOC116808633	BSX			MID1	LOC116806731					OSR2	LOC115494345	CRHR2		LOC116808270	MRPS11	MTFR2	COL5A1								LOC100225686	LOC115491013
XPNPEP1			LOC115493770	LOC116807754	TPM2							LOC115492331	LOC115494051	LSP1	LOC116809189	ARRDC1					EPHB1	ARHGAP45	LOC116808794	BTBD17			MIR1743	LOC116806757					OTX1	LOC115494449	CRYGS		LOC116808461	MTHFD1L	MTO1	COL6A1								LOC100225953	LOC115491286
ZDHHC6			LOC115493772	LOC116808127	TSTA3							LOC115492732	LOC115494157	MAJIN	LOC116809266	ARRDC4					EPHX2	ARHGAP6	LOC116808971	BTBD2			MLNR	LOC116806811					PENK	LOC115494452	CS		LOC116808650	MTUS2	MYB	COL6A2								LOC100226902	LOC115492401
ZNF488			LOC115493774	LOC116808628	TTC26							LOC115492776	LOC115494387	MARK3	LOC116809291	ARSK					ERCC1	ARHGEF10L	LOC116809116	BTBD8			MOSPD2	LOC116806823					PHOX2B	LOC115494456	CSNK1E		LOC116808790	MYO16	NKX2-2	COL6A3								LOC100227392	LOC115492594
ZRANB3			LOC115493777	LOC116808678	UBXN2B							LOC115493154	LOC115494421	MECR	LOC116809333	ARV1					ERCC8	ARHGEF9	LSS	BTD			MRPL30	LOC116806855					PIGP	LOC115494517	CSNK1G2		LOC116808895	MYO1B	NOX3	COLEC10								LOC100227480	LOC115493242
			LOC115493790	LOC116809183	USP24							LOC115493491	LOC115494438	MED19	LYN	AS3MT					EVA1C	ARID1A	MAP3K9	BTRC			MSANTD4	LOC116806893					PLP1	LOC115494532	CSNK2A1		LOC116808987	MYO1D	ORC3	COLEC11								LOC100228336	LOC115493641
			LOC115493795	LOC116809336	USP40							LOC115493556	LOC115494550	MEOX1	MAFB	ASB12					EXOC5	ARID2	MAPKBP1	BUD13			MTMR2	LOC116806934					PNMT	LOC115494632	CTU2		LOC116809023	NEDD9	OSTM1	COMP								LOC100228408	LOC115493646
			LOC115493796	LRRIQ1	VCPIP1							LOC115493566	LOC115494655	MICAL2	MPEG1	ASB13					FAAP24	ARID3A	MEIS2	BZW2			MTMR6	LOC116807003					PPP1CC	LOC115494686	CUNH6orf136		LOC116809070	NFKBIZ	PDCD2	CP								LOC100228510	LOC115493847
			LOC115493817	LTA4H	VIRMA							LOC115493642	LOC115494746	MMP23B	MYO1F	ASB2					FABP3	ARID5A	MIPOL1	C10H15orf40			MZT1	LOC116807090					PRL	LOC115494715	CUX1		LRP1	NLN	PGBD5	CRIP1								LOC100228937	LOC115493848
			LOC115493825	MAPK12	VPS13B							LOC115493643	LOC115494806	MOB2	P2RY2	ASB3					FAM110D	ARID5B	MLH3	C12H3orf18			N4BP2L2	LOC116807124					PTPRN	LOC115494793	CXXC1		LSM5	NPAS3	PGM3	CRIP2								LOC100229165	LOC115493907
			LOC115493831	MATK	VPS35L							LOC115494035	LOC115494819	MRPL16	P2RY6	ASCL1					FAM135A	ARL13B	MPP5	C13H5orf47			NALCN	LOC116807128					RGS16	LOC115494853	CYTH3		MACF1	NTHL1	PIGM	CRTAP								LOC100229354	LOC115494390
			LOC115493901	MED21	XPNPEP2							LOC115494290	LOC115494877	MUC2	P2RY8	ASIC3					FASTK	ARMC1	NDUFAF1	C15H12orf43			NARS2	LOC116807132					RGS4	LOC115494861	DAPK2		MAEA	OSBPL7	PIH1D1	CRY2								LOC100230278	LOC115494401
			LOC115494128	MIRLET7D	XPOT							LOC115494324	LOC115494880	MYO15A	PEAK3	ASIC4					FBXO15	ARMC7	NDUFS3	C1AH12orf50			NAXD	LOC116807147					RINT1	LOC115494881	DAPL1		MBD5	PANK3	PLN	CSF1								LOC100231371	LOC115494410
			LOC115494152	MLC1	YPEL1							LOC115494553	LOC115494918	NADSYN1	PLD4	ASTE1					FDXR	ARMC8	NRDE2	C1AH22orf23			NLGN4X	LOC116807148					SCG2	LOC115494972	DARS1		MDH1	PATJ	PM20D2	CSNK2A2								LOC100231426	LOC115494460
			LOC115494153	MOV10L1	ZNF507							LOC115494713	LOC115495014	NAT10	PLEKHA2	ASXL1					FEM1B	ARPC3	NSDHL	C1GALT1C1			NUP58	LOC116807177					SEZ6	LOC115494999	DCAF15		MED13L	PCDH7	POLH	CSPG4								LOC100231857	LOC115494493
			LOC115494309	MYBPC1	ZNF518A							LOC115494747	LOC115495109	NDUFV1	PSAP	ASXL2					FEZ1	ARRDC3	PGF	C1H2orf49			PAK1	LOC116807183					SLC18A2	LOC115495034	DCAF8		MFF	PCGF5	PPP1R21	CSRP1								LOC100232025	LOC115494533
			LOC115494544	MYNN								LOC115494751	LOC115495206	NELL1	PTAFR	ATAD2					FGFR3	ARSB	PIGH	C1H3orf85			PDCL3	LOC116807185					SLC23A2	LOC115495046	DCAKD		MICOS10	PDE5A	PRSS35	CST7								LOC100232461	LOC115494635
			LOC115494980	NAGA								LOC115494837	LOC115495295	NLRP3	PTGER4	ATCAY					FHOD1	ASB1	PIK3C2A	C1QL2			PDGFD	LOC116807191					SLC29A4	LOC115495058	DCLK3		MIGA2	PDZD2	PYGB	CTNNA1								LOC100232544	LOC115494704
			LOC115495294	NAV3								LOC115496391	LOC115495349	NUCB2	PTPN6	ATE1					FKRP	ASB10	PITPNM3	C1QTNF12			PGR	LOC116807200					SLC31A1	LOC115495088	DCTN1		MIR138-1	PEX11B	RCAN2	CTNNBL1								LOC100232706	LOC115494706
			LOC115495590	NDUFA6								LOC115496429	LOC115495573	NUP160	RAC2	ATF6					FMC1	ASB11	PLA2G4F	C1QTNF3			PIANP	LOC116807210					SLC35D3	LOC115495333	DCTN2		MIR1641	PEX12	RHOB	CTTNBP2NL								LOC101232903	LOC115494932
			LOC115497806	NDUFB2								LOC115496652	LOC115495622	OSBPL5	REP15	ATF7IP					FNBP4	ASB16	PLEKHD1	C25H1orf43			PIBF1	LOC116807211					SLC7A11	LOC115495370	DDA1		MIR204-2	PGM2L1	RHOQ	CYGB								LOC101234197	LOC115495045
			LOC116807209	NOL12								LOC115496918	LOC115495637	OVCH2	RGS18	ATG13					FOXS1	ASCC1	PLEKHH1	C27H17orf113			PICALM	LOC116807212					SLITRK6	LOC115495400	DDOST		MIR27	PGP	RMDN2	DAB2IP								LOC101234199	LOC115495091
			LOC116807760	NTF3								LOC115497026	LOC115495682	PAPOLA	RHBDF1	ATG16L1					FRMD8	ASCC2	POMT2	C2CD2			POLR3GL	LOC116807213					SNAP25	LOC115495405	DDX17		MIR499	PIEZO2	RNASET2	DACT1								LOC105758644	LOC115495094
			LOC116807782	NUP50								LOC115497062	LOC115495967	PATL1	ROR1	ATG2B					FST	ASCL2	PPP2R3C	C2H5orf49			PRCP	LOC116807218					SNCA	LOC115495428	DDX23		MIRLET7F	PLCB1	RNF146	DBN1								LOC105759208	LOC115495337
			LOC116807785	ORC5								LOC115497066	LOC115495982	PMCH	RSAD2	ATG4A					FSTL5	ASIC5	PRKD1	C2H8orf37			PRKX	LOC116807273					SNCB	LOC115495539	DDX46		MLXIPL	PPA2	RNF8	DCN								LOC115491191	LOC115495364
			LOC116807789	PAQR8								LOC115497256	LOC115496091	POLD4	SASH3	ATMIN					FURIN	ASTN2	PSEN1	C3H1orf131			PROSER1	LOC116807274					SNCG	LOC115495563	DEDD		MRPS36	PPM1G	RPS27A	DDR2								LOC115491358	LOC115495505
			LOC116807793	PDXP								LOC115497416	LOC115496314	PPFIA1	SERPING1	ATN1					FZD2	ASXL3	PTGR2	C4AHXorf56			PROZ	LOC116807406					SOX10	LOC115495873	DENND1B		MTSS2	PROX1	RRAGD	DES								LOC115491510	LOC115495587
			LOC116807795	PDZRN4								LOC115497603	LOC115496561	PPFIBP2	SH3BP1	ATP10B					G6PC3	ATF1	PTPMT1	C6H10orf90			PRSS23	LOC116807427					SSTR5	LOC115495904	DENND6B		MXRA5	PTPRD	RRP36	DFFB								LOC115491675	LOC115495729
			LOC116807804	PHYH								LOC115497651	LOC115496648	PRPF19	SH3BP2	ATP11B					G6PD	ATG101	PTPN21	C7H2orf69			RASA3	LOC116807428					STC1	LOC115495936	DLG1		MYO5A	PTPRE	RSPH9	DIPK2B								LOC115492532	LOC115495745
			LOC116807816	PIK3CG								LOC115498478	LOC115496818	PTDSS2	SLC25A36	ATP12A					GALK1	ATG3	RAD51B	C7H2orf76			RASL11A	LOC116807429					STMN2	LOC115495963	DMAC1		NARS1	PTS	RTN4IP1	DKK3								LOC115492621	LOC115495746
			LOC116807830	POC1B								LOC115498493	LOC115496970	PTPRJ	SMG9	ATP1B3					GATD3A	ATG4C	RAG2	C8H1orf210			RB1	LOC116807434					STMN3	LOC115496074	DNAAF2		NDUFA12	RAB8B	SDCCAG8	DLC1								LOC115492675	LOC115495776
			LOC116807835	POLDIP3								LOC115498527	LOC115496985	RAB15	SPI1	ATP2A1					GDF6	ATL1	SCFD1	C9H2orf72			RCBTB1	LOC116807436					SV2C	LOC115496182	DNAI2		NDUFB1	RABEPK	SLC25A27	DLL1								LOC115492712	LOC115495918
			LOC116807836	PPFIA2								LOC116806672	LOC115497128	RAD9A	SRC	ATP2B1					GHDC	ATL2	SETD3	C9H3orf70			RCBTB2	LOC116807446					SYT2	LOC115496220	DNAJC9		NDUFB9	RABL2A	SLX4IP	DLX3								LOC115493407	LOC115496002
			LOC116807843	PPHLN1								LOC116806820	LOC115497141	RIC8A	STARD8	ATP4A					GIT1	ATOH1	SHISA9	CAB39L			REPS2	LOC116807528					TAGLN3	LOC115496270	DNLZ		NEB	REC114	SMC6	DPEP1								LOC115493485	LOC115496015
			LOC116807852	PPP1R3A								LOC116806834	LOC115497168	RMDN3	STING1	ATP5F1A					GLMP	ATP10D	SLC1A2	CACHD1			RFC3	LOC116807538					TAMALIN	LOC115496300	DOK5		NELFB	RIN2	SMYD2	DPT								LOC115493520	LOC115496226
			LOC116807873	PRDM4								LOC116806926	LOC115497264	RND2	SYNGR3	ATP5PD					GMPS	ATP13A2	SLC25A21	CACNB2			RFXAP	LOC116807545					TCAP	LOC115496408	DPH1		NFAT5	RLBP1	SMYD3	DR1								LOC115493530	LOC115496227
			LOC116807954	RASSF3								LOC116807187	LOC115497523	RNF141	TBX21	ATP5PO					GNGT2	ATP13A3	SLC35C1	CACNB4			RIOX2	LOC116807549					TES	LOC115496634	DPM3		NOTCH1	RNF150	SPTBN1	DUSP7								LOC115493629	LOC115496251
			LOC116807955	RECQL								LOC116807449	LOC115497558	RRAS2	TGFBI	ATP6AP2					GPAM	ATP1A1	SLC7A3	CADM3			RS1	LOC116807584					TH	LOC115496770	DPY19L3		OTOGL	RNF217	SRBD1	DYSF								LOC115493706	LOC115496373
			LOC116808726	RESF1								LOC116807526	LOC115497836	SAAL1	TLR2	ATP6V1B1					GPCPD1	ATP1B1	SLC8A3	CALCRL			SACS	LOC116807596					TRPA1	LOC115496830	DPYSL3		PARD3B	RRAGC	TDRD15	EBF1								LOC115493862	LOC115496629
			LRRC3B	RPAP3								LOC116807568	LOC115497845	SCMH1	TLR4	ATP6V1B2					GPX1	ATP2A2	SMOC1	CAMK1D			SH3RF1	LOC116807599					TRPC5	LOC115496894	DRAP1		PDIK1L	SCRT1	TFB1M	ECE1								LOC115493890	LOC115496657
			MAK	RRP7A								LOC116807637	LOC115497915	SCUBE2	TNFAIP8L1	ATP6V1E1					GRK2	ATP2C2	SNAPC1	CAPN10			SH3RF3	LOC116807601					UGP2	LOC115496979	DRAXIN		PFDN4	SCUBE1	TIAM2	ECM2								LOC115493923	LOC115496885
			MALSU1	RXYLT1								LOC116807665	LOC115498215	SDHAF2	TNFRSF25	ATP6V1G1					GRN	ATP6V0B	SPATA7	CASKIN2			SKA3	LOC116807615					VSTM2L	LOC115497073	DSEL		PHC3	SEMA6D	TMEM18	EDIL3								LOC115494103	LOC115496926
			MASTL	SGSM3								LOC116807732	LOC115498257	SEL1L	TOB1	ATP8B2					GSE1	ATP6V0E1	SPTBN5	CATIP			SLC15A1	LOC116807629					XCR1	LOC115497080	DTX4		PHIP	SERF2	TP53I3	EDN2								LOC115494522	LOC115496983
			MCUR1	SLC26A4								LOC116807774	LOC115498439	SERGEF	TREM2	ATP9A					GTF2H3	ATP7A	SRP54	CBFB			SLC37A1	LOC116807640					ZNF276	LOC115497115	DVL3		PKD1	SGPP1	TPO	EDNRA								LOC115494687	LOC115497068
			MIOS	SLC26A5								LOC116807787	LOC116806608	SH2D5	TRNAT-AGU_1	ATRIP					GZMA	ATP8B3	STAP2	CBLB			SLC46A3	LOC116807927						LOC115497246	DYTN		PKN3	SH3D19	TSTD3	EDNRB								LOC115494689	LOC115497148
			MPP7	SLC2A13								LOC116807788	LOC116806665	SIRT3	VCAM1	ATRN					H3F3A	ATPAF2	STK32C	CBLN4			SMAD9	LOC116807941						LOC115497286	EDC4		PLXNB1	SHROOM2	UBE2J1	EFCAB1								LOC115495235	LOC115497230
			MRPL3	SLC37A3								LOC116808086	LOC116806709	SKAP1	YTHDC2	ATXN7					HAND1	ATXN7L1	STXBP6	CCDC15			SPART	LOC116808025						LOC115497289	EEF1D		PMEPA1	SLC1A1	UBE3D	EFHD1								LOC115495551	LOC115497400
			MRPL32	SNRPF								LOC116808117	LOC116806780	SKI		AVEN					HBS1L	AUH	SUSD6	CCDC166			SRPX	LOC116808050						LOC115497421	EEF1G		POLR2E	SLC22A23	VRK2	EFNB1								LOC115495948	LOC115497675
			MRS2	SNU13								LOC116808138	LOC116807032	SLC17A6		AXIN1					HCN2	AURKA	TDP1	CCDC174			STXBP5L	LOC116808118						LOC115497570	EGR2		POLR2L	SMIM38	VTA1	EGFLAM								LOC115496035	LOC115497775
			MTPAP	SOCS2								LOC116808272	LOC116807198	SLC22A18		AZI2					HDHD3	B3GALNT2	TDRD9	CCDC198			SYTL2	LOC116808198						LOC115497571	EI24		POMP	SNUPN	WDR27	EMC1								LOC115496682	LOC115497951
			MYRIP	SSBP1								LOC116808511	LOC116807203	SNAP23		B3GNT5					HEPH	B3GNT4	TERB2	CCDC30			TBX15	LOC116808201						LOC115497676	EIF2AK4		PPP2R2D	SOAT1	WDR35	EMID1								LOC115496857	LOC115498168
			NDUFA4	ST7								LOC116808665	LOC116807534	SNRPB		B4GALNT3					HEY1	B3GNTL1	TMEM62	CCDC39			TEAD4	LOC116808437						LOC115497678	EIF3G		PREX2	STT3B	WDR64	EMILIN1								LOC115497131	LOC116806639
			NEK11	STMP1								LOC116808722	LOC116807609	SPIRE2		B4GALNT4					HFM1	BABAM2	TRNAI-AAU_2	CCDC42			TGDS	LOC116808531						LOC115497744	EIF5B		PRKAR1A	TAC1	WTAP	EMX2								LOC115497147	LOC116806703
			NKIRAS1	STYK1								LOC116808869	LOC116807695	SSRP1		B4GALT6					HHLA2	BACE1	TRNAS-GCU_3	CCDC47			TMCO3	LOC116808572						LOC115497862	ELMO2		PSMF1	TAF11	XRN2	ENG								LOC115497152	LOC116806747
			NOD1	SVOPL								LOC116809005	LOC116807783	SWAP70		BACE2					HINT2	BACH1	TTC17	CCDC50			TMEM114	LOC116808602						LOC115498272	ELP2		PSMG1	TBC1D5		ENTPD2								LOC115497211	LOC116806763
			NPHP3	SYCE3								LOC116809072	LOC116807846	SYT7		BAIAP2					HLX	BAG1	TTC8	CCDC62			TMEM255B	LOC116808606						LOC115498325	EMC10		PTRH2	TJP2		EOGT								LOC115497384	LOC116806806
			OTULIN	SYPL1								LOC116809136	LOC116807850	TADA2A		BAIAP2L2					HMGN2	BAG2	TTC9	CCDC66			TNFRSF19	LOC116808656						LOC115498566	EMC4		R3HDM1	TLCD4		EPOP								LOC115497385	LOC116806943
			OXSM	TAFA5								LOC116809157	LOC116807903	TEAD1		BAZ2A					HNRNPL	BAHD1	TYMS	CCDC69			TRNAP-CGG_1	LOC116808669						LOC115498600	EMC6		RAD51	TMEM106C		ESAM								LOC115497572	LOC116807235
			PAK1IP1	TBK1								LOC116809227	LOC116807925	TIGD5		BBS10					HOXB2	BAP1	UNC79	CCDC71			TRPC6	LOC116808701						LOC116807435	EMC8		RBM17	TMEM234		ESR1								LOC115497757	LOC116807256
			PATL2	TCP11L2								LRRC4	LOC116807946	TIMM10		BBS12					HPS4	BARD1	VIPAS39	CCDC77			TSC22D1	LOC116808844						LOC116807698	EML5		RTCB	TMEM240		ETS1								LOC115497939	LOC116807712
			PAX1	TM7SF3								LSM3	LOC116808104	TMEM258		BBS2					HSPA8	BARHL1	VPS18	CCDC92			TULP3	LOC116808887						LOC116807865	EN2		SAMHD1	TMTC2		EVA1B								LOC115498444	LOC116807808
			PAXIP1	TMBIM4								LSM6	LOC116808162	TMEM60		BCAR1					HSPB8	BARX2	VPS39	CCDC9B			TXLNG	LOC116808994						LOC116807909	ENTPD4		SCUBE3	TRNAI-UAU		EVI2B								LOC115498522	LOC116807921
			PFKP	TMEM117								LURAP1L	LOC116808199	TNNT3		BCAR3					ID1	BATF3	VRK1	CCNB2			TXNDC9	LOC116809179						LOC116808232	ENTPD7		SELENOK	TSPAN33		EXTL1								LOC115498583	LOC116807937
			PITRM1	TMEM19								MARCHF5	LOC116808661	TPH1		BCAS1					IDH2	BAZ1A	VRTN	CCNC			UPF3A	LOC116809210						LOC116808257	EPRS1		SET	UAP1		F2RL2								LOC116806616	LOC116808044
			PLPP7	TOMM22								MDFI	LOC116808702	TRPM5		BCCIP					IGDCC3	BAZ1B	VTI1B	CCND2			USF3	LOC116809241						LOC116808476	ERCC3		SETD5	VLDLR		FAM124B								LOC116806656	LOC116808119
			POMGNT2	TRMU								MED20	LOC116808806	TSPAN4		BCKDHB					IGF2BP2	BCAS3	WARS1	CCNH			USP35	LOC116809334						LOC116808526	ETFRF1		SIX1	WASHC4		FAM171A2								LOC116806677	LOC116808252
			PPP1R9A	TTC38								MED30	LOC116808820	TUB		BCL2A1					IL34	BCDIN3D	WDR20	CCNT2			VEGFD	LOC116809335						LOC116808534	ETNPPL		SKP1	WBP1		FAM180A								LOC116806972	LOC116808507
			PTER	TUBGCP6								MEI4	LOC116808939	UEVLD		BCL2L14					IL6R	BCL10	XRCC3	CCP110			VPS36	LRRC26						LOC116808536	ETV7		SLC16A3	WDFY1		FAM20A								LOC116807062	LOC116808521
			PTPRN2	VEZT								METAP2	LOC116808965	UNC93B1		BEGAIN					INPP5K	BCL9L	ZC2HC1C	CCT5			VWA8	LSAMP						LOC116808537	EXOSC1		SLC26A2	WDR18		FAM3C								LOC116807064	LOC116808549
			RALBP1	VT1								METTL9	LOC116809050	USH1C		BEND3					INTS7	BCLAF1	ZNF770	CD151			WDFY2	LYPD1						LOC116808568	EXOSC5		SLC43A2	WIPF2		FBLN1								LOC116807071	LOC116808589
			RAMP3	WNT16								MINDY3	LOC116809071	VPS37C		BEND5					IRF2BP2	BCLAF3		CDADC1			XK	MANBAL						LOC116808584	FAAP100		SOD1	WWP1		FBN3								LOC116807085	LOC116808591
			RANBP9	WNT2								MIR101-2	LOC116809100	XKRX		BEST3					IRF7	BCOR		CDAN1			ZAR1L	MYLK3						LOC116808604	FADS6		SOX13	XYLT2		FDX2								LOC116807157	LOC116808594
			RBM33	XRCC6								MIR194-1	LOC116809131	ZFYVE16		BICD2					IRX6	BCORL1		CDC14A			ZNF384	NEFH						LOC116808607	FAM107B		SRP19	ZFAND2B		FERMT2								LOC116807181	LOC116808826
			RBM48	YIPF7								MIR7644	LOC116809214			BIN2					JMJD8	BDH1		CDC16				NOSIP						LOC116808631	FAM136A		SYCP3			FEV								LOC116807551	LOC116808851
			RELCH	ZCRB1								MKKS	LOC116809243			BIRC7					KANK3	BECN1		CDC42				OSBPL11						LOC116808690	FAM151B		TCF7L2			FGF7								LOC116807667	LOC116809000
			RFTN1									MMP17	LRIG2			BLOC1S6					KCNIP3	BFSP1		CDH4				PDF						LOC116808776	FAM160A2		TCTN3			FGFBP3								LOC116807704	LOC116809021
			RGS20									MPP2	LRIG3			BLZF1					KCNK12	BHLHE22		CDHR5				PECR						LOC116808815	FAM207A		TMEM167A			FGFR2								LOC116807725	LOC116809055
			RIPOR2									MRM2	LWS			BMP2K					KHK	BHLHE40		CDK1				PIPOX						LOC116808876	FAM219A		TMEM263			FGR								LOC116807779	LOC116809057
			RPA3									MRPS17	MAGI3			BMPR1A					KIF25	BHLHE41		CDK17				POLG2						LOC116808964	FAM43B		TMEM59			FHL1								LOC116807908	LOC116809125
			RPL15									MSH6	MAP3K4			BNC1					KIFBP	BICDL1		CDK6				PRRG1						LOC116809017	FAM83F		TPST1			FHL3								LOC116807912	LOC116809200
			RPP38									MXI1	MAP3K7			BNIP3L					KLHL11	BIVM		CDKL2				RALA						LOC116809236	FARSA		UBN1			FHL5								LOC116807942	LOC116809216
			RPP40									NAE1	MAPK8			BOD1L1					KSR1	BLM		CDKN2AIP				RAP1B						LOC116809277	FAU		UFD1			FIBIN								LOC116808115	LPP
			RPSA									NBR1	MAPK9			BOK					KTI12	BLVRA		CDV3				RAPGEFL1						LOC116809286	FBXL12		VPS29			FILIP1L								LOC116808260	LRCH2
			RSU1									NDFIP2	MAPRE2			BOP1					LAMTOR1	BMI1		CDX2				RETSAT						LOC116809330	FBXL4		ZC3H6			FKBP10								LOC116808473	LRP1B
			SCIN									NDUFAF5	MARCHF8			BORA					LDLR	BMP3		CENPH				RNF170						LOXHD1	FBXO42		ZNF469			FKBP15								LOC116808578	LRP4
			SEC22B									NKAIN1	MARCKSL1			BORCS5					LEMD3	BMP5		CENPK				RNF186						LRRC7	FBXW9					FLI1								LOC116808627	LRP6
			SEH1L									NOM1	MCM3AP			BPGM					LLGL1	BPIFB2		CENPV				RPL17						LRRTM2	FER					FLRT3								LOC116808704	LRRC20
			SEMA3D									NPR2	METTL21C			BRCA2					LMAN2L	BPIFC		CENPX				S100A1						MALRD1	FEZF1					FMOD								LOC116808721	LRRC39
			SGCE									NPTX2	MFSD10			BRD9					LMBRD1	BRAF		CEP112				SIM1						MASP2	FGD3					FN1								LOC116808827	LRRFIP1
			SGO1									NSUN3	MIER2			BRF1					LOC100190731	BRAP		CEP126				SOS2						MGAT4C	FGF22					FNDC1								LOC116808847	LRRN2
			SKAP2									NUDT19	MIER3			BRI3BP					LOC100218477	BRD1		CEP19				SRL						MMP16	FGF3					FOXD2								LOC116808898	LYST
			SLC25A40									NUP43	MIR190			BRINP1					LOC100220017	BRD3		CEP44				STRIP1						MOS	FNDC9					FOXL3								LOC116808915	MAMLD1
			SLC39A12									OAZ1	MIR2989-2			BRIX1					LOC100220663	BRD7		CEP57				SYN3						MTA3	FOCAD					FSTL3								LOC116808975	MAST4
			SLC6A19									ODC1	MLANA			BRPF3					LOC100220754	BRDT		CEP83				SYTL3						MYF5	FOXN4					FZD4								LOC116809009	MDN1
			SNX10									OIT3	MLLT1			BRS3					LOC100221272	BRPF1		CES2				TAB3						MYOM1	FSD1					FZD8								LOC116809026	MED12
			SNX19									PABPC1L	MSX1			BSN					LOC100221708	BRWD3		CFAP100				TANGO6						MYRFL	FZD6					G0S2								LOC116809135	MED6
			SOSTDC1									PAIP1	MTA1			BTF3					LOC100221952	BSPRY		CFAP410				TK2						NAT8	GADD45GIP1					GAB2								LOC116809272	METTL7A
			SRI									PARL	MYCL			BTG4					LOC100222682	BTBD19		CFAP47				TMEM51						NEK10	GALNT10					GALNT15								MALL	MGA
			SSTR3									PARP1	NAT8L			BUD31					LOC100223778	BUB1		CFAP58				TRAPPC10						NLGN1	GAS2L1					GASK1A								MAN1C1	MIR30E
			STEAP1									PBK	NCF4			BVES					LOC100223936	BYSL		CFAP65				TRNAL-UAA						NRXN1	GAS8					GATA6								MAP1LC3A	MLF2
			STK17A									PCMTD1	NDUFV3			C11H16orf70					LOC100224272	BZW1		CFAP70				TRPM1						OIP5	GBX2					GID4								MAPK4	MPDZ
			SYCP2L									PDE6C	NEK9			C13H5orf15					LOC100224417	C10H15orf48		CFAP74				TSHZ1						OPTN	GCC1					GJA4								MAPK6	MRPL22
			TDP2									PGM2	NFXL1			C14H16orf72					LOC100224497	C11H16orf87		CFAP91				TSPAN15						PDS5B	GCNT3					GJC2								METTL26	MRPS7
			TERT									PHLDA3	NHSL1			C14H16orf91					LOC100224559	C12H3orf14		CGA				UFM1						PIGB	GEMIN6					GLI2								MFSD4A	MTOR
			TFAP2A									PIP4P2	NKX2-4			C14H7orf50					LOC100224564	C14H16orf71		CGNL1				UHMK1						PLAG1	GNA12					GLIPR2								MIOX	MTR
			THSD7A									PLA2G12A	NMS			C15H12orf65					LOC100225666	C17H9orf16		CGREF1				UPP1						PLPP4	GNAO1					GLIS2								MIR30C	MYCBP2
			TIMM21									PLBD2	NTNG2			C17H9orf78					LOC100226245	C1AH12orf40		CHCHD4				VPS9D1						PRKACB	GNL1					GLRX5								MME	N4BP2
			TMEFF1									PLCD1	PACS2			C1AH12orf4					LOC100226809	C1AH12orf45		CHCHD6				WDR59						PTCH1	GPER1					GLUD1								MPZL2	NAA16
			TMEM108									PLCD3	PARD6A			C1D					LOC100226816	C1H11orf87		CHL1				WRAP53						RAPGEF4	GPR107					GLYR1								MYO7A	NAT9
			TMEM196									PMS1	PCGF6			C1QTNF6					LOC100226820	C1QTNF8		CHMP7										RASEF	GPR135					GM2A								MZB1	NAV2
			TMEM42									POLD2	PDAP1			C22H2orf42					LOC100226888	C21H1orf167		CHRND										RASGRP3	GPR78					GPC4								NCS1	NBEAL1
			TMPPE									PPP1CB	PDZK1			C26H1orf74					LOC100226962	C23H1orf109		CHST13										RORB	GPRIN1					GPR20								NOS1	NCOA3
			TOP2B									PPP1R10	PHTF2			C26H6orf132					LOC100227062	C24H11orf52		CHTOP										SEC14L5	GRINA					GPX3								NOX1	NCOA6
			TPK1									PPP2CA	PLEKHA8			C26H6orf89					LOC100228474	C24H11orf53		CIAPIN1										SETBP1	GSDMA					GPX8								NUAK2	NCOR1
			TRAK1									PRR15L	PLEKHF2			C2H7orf31					LOC100229420	C28H19orf44		CISD3										SHISAL1	GTF3C3					GRK5								OCLN	NDUFC2
			TRDMT1									PTBP2	PLGRKT			C3H6orf58					LOC100229710	C2CD2L		CITED4										SLC45A2	GTPBP6					GSC								ORM2	NEDD4
			TRNAR-ACG									QRSL1	PNLDC1			C5					LOC100230194	C2H1orf35		CKAP5										SNTG1	GULP1					GSN								P2RY4	NF1
			TXNDC5									RAB3C	POLA1			C5H11orf24					LOC100230531	C2H6orf62		CLCC1										SPACA6	GUSB					GYG1								PAX2	NFATC2
			UBP1									RAB8A	PPM1F			C6H10orf88					LOC100231439	C2H9orf152		CLCN4										SPG11	H2AFV					GYPC								PCK1	NFX1
			VPS41									RAD51AP2	PRR7			C8B					LOC100231564	C3AR1		CLEC14A										SPIN1	HCFC2					HAPLN3								PDX1	NIPBL
			VPS50									RFK	PRRT3			C8H1orf146					LOC100231656	C4AH8orf48		CLK4										SUGP2	HECA					HCN3								PDZK1IP1	NOTCH2
			VSTM2A									RNF13	PRXL2C			C9orf72					LOC100232323	C5H11orf91		CLPX										TBR1	HEXIM1					HECTD2								PERP	NPPC
			VWDE									RNF17	PSD3			CA12					LOC100232360	C5H11orf94		CLTB										TIMELESS	HHLA1					HEG1								PHGDH	NSD1
			WDR37									RNF41	PSMD8			CA6					LOC101232981	C5H14orf39		CMTM4										TLL1	HIGD2A					HEYL								PHLDA1	NSMF
			WDR60									ROBO3	PTP4A1			CACNA1B					LOC101233155	C6		CMTM7										TLX3	HJURP					HHIP								PKHD1	NUDT1
			WIPF3									RRM2	PWP2			CACNA1D					LOC101233349	C6H10orf143		CNN3										TMEM207	HK1					HIC1								PLA1A	NUP210
			WRNIP1									RSL24D1	PYCR3			CACNA1E					LOC101233369	C8G		CNOT2										TMEM252	HLF					HOXA10								PLAAT1	OGT
			YAE1									RUVBL1	R3HCC1			CACNA1G					LOC101233610	C8H1orf112		CNTN3										TMEM61	HMBOX1					HOXA7								PLAT	OSBPL6
			ZDHHC3									SCAF11	RAB5C			CACNA1S					LOC101233730	C8H1orf21		CNTN6										TNFAIP3	HNRNPA3					HOXA9								PLCB4	PCSK7
			ZNF438									SEC61A1	RAC1			CACNG2					LOC101233936	C8H1orf52		CNTNAP5										TNFRSF1B	HNRNPR					HOXB7								PLSCR1	PDE3A
												SELENOF	RAP1GAP			CACNG5					LOC105758631	CA4		COASY										TOGARAM1	HOXD1					HOXC9								PPP1R1B	PDHA1
												SEPHS1	RBPMS2			CACUL1					LOC105758664	CA7		COG4										TPP2	HS2ST1					HSPB1								PRICKLE4	PEAK1
												SF3A1	RC3H2			CACYBP					LOC105758838	CAB39		COL25A1										TULP4	HTRA2					HSPB7								PTGES	PIK3CA
												SGCG	RCOR1			CAD					LOC105758846	CABLES1		COL4A6										TXLNB	ICE2					ID3								PTGS1	PKN2
												SHB	REM1			CALHM4					LOC105758849	CABP2		COLGALT1										UNC5C	IDH3B					IGF1								PTN	PLCH2
												SIK3	RLIM			CALML4					LOC105758863	CABP7		COMMD1										UNC80	IFNGR1					IGFBP4								RASL10B	PLD1
												SIKE1	RPL39			CAMK2B					LOC105759153	CACNA1H		COPG1										USP42	IGBP1					IGFBP7								RASSF9	PLEKHG1
												SLBP	RPRD1B			CAMK4					LOC105759492	CACNA1I		COPS2										VPS37D	IKBIP					IKBKE								REG4	PLXNA1
												SLC16A1	RSBN1			CAMP					LOC105759674	CACNA2D1		COPS3										VSX2	IKBKG					IL13RA1								RGS2	POLR1A
												SLC30A7	SAMD7			CAMTA1					LOC115490742	CACNA2D2		COPS7B										XIRP2	IL17RA					IL15RA								RHOV	POLR2A
												SLC66A2	SARDH			CANT1					LOC115490792	CACNA2D4		COQ6										ZFYVE28	IL23A					INPPL1								RMI1	POP5
												SLF1	SBK1			CAPN9					LOC115490840	CACNG3		CPD										ZNF217	ILDR1					INSYN2B								ROR2	PRKAA2
												SMARCC2	SCML2			CAPRIN1					LOC115490903	CADPS		CPEB3										ZNF366	ILF2					ISLR								RP2	PRKDC
												SMIM20	SCNM1			CASK					LOC115491155	CADPS2		CPOX										ZNF385B	ILK					ITGA1								RSPO3	PROC
												SMU1	SETX			CASKIN1					LOC115491174	CALB2		CPXM2										ZSWIM6	IMP4					ITGA11								SALL1	PRPF8
												SNX4	SFMBT2			CASP9					LOC115491199	CALCB		CRISPLD2											INKA1					ITGA3								SEBOX	PRR14L
												SNX5	SH2D4A			CASS4					LOC115491211	CALHM1		CROCC											INTS3					ITGB1								SEMA3B	PRRC2B
												SPAG1	SH3BGRL3			CAST					LOC115491274	CALHM3		CRYBA4											IP6K1					ITGB3								SFT2D2	PRRC2C
												SPPL2A	SHMT1			CASTOR2					LOC115491348	CALN1		CRYBB1											IPP					JDP2								SGK1	PSMD7
												SRP14	SLC15A2			CAVIN1					LOC115491475	CALU		CRYGN											IRS4					JPH2								SGMS1	PSPC1
												SSC4D	SLC25A38			CAVIN4					LOC115491649	CAMK1G		CRYL1											ISCU					KCNB1								SGPL1	PTCRA
												ST13	SLC39A10			CBX1					LOC115492115	CAMK2A		CSDC2											ITGB6					KCND2								SH3BGRL2	PTGER3
												STAMBP	SLC45A1			CBX7					LOC115492409	CAMK2G		CSTF3											ITM2B					KCNH4								SH3TC1	PTPRB
												STK39	SLCO4A1			CBY2					LOC115492733	CAMKK1		CTBP2											ITPA					KCNJ8								SIM2	PTPRF
												STRA8	SMC3			CCDC115					LOC115492922	CAMKK2		CTC1											JOSD2					KCNQ5								SLC13A2	PTPRM
												SUB1	SNX30			CCDC117					LOC115493001	CAMSAP1		CTCF											KAT5					KCTD1								SLC23A1	PURG
												SUPT5H	SPECC1L			CCDC137					LOC115493085	CANX		CTLA4											KAT7					KDR								SLC25A29	QSER1
												SYAP1	SPG21			CCDC142					LOC115493092	CAPZA1		CTNNA3											KCNA10					KIAA0040								SLC26A3	RALGAPA1
												SYVN1	SPOUT1			CCDC152					LOC115493148	CARD10		CTSC											KCNN2					KIAA1210								SLC34A1	RALGAPB
												TBC1D15	SPPL2B			CCDC167					LOC115493215	CARD19		CTSH											KCNV2					KLF2								SLC4A2	REEP2
												TBCA	SPRN			CCDC187					LOC115493304	CARD9		CTSK											KDELR3					KLHDC8A								SLC5A11	REST
												TDRD1	SRGN			CCL19					LOC115493308	CARM1		CUTC											KDSR					LAMB1								SLC7A13	RFLNB
												TDRP	SSTR2			CCNB3					LOC115493432	CARTPT		CXCL12											KEAP1					LAMC3								SLC7A9	RICTOR
												TEAD3	ST8SIA6			CCNI					LOC115493503	CASP7		CYFIP2											KITLG					LHFPL6								SLC9A3R1	RIF1
												TEKT4	SULF1			CCNL1					LOC115493506	CASP8AP2		CYSLTR1											KLHL2					LHX9								SMIM24	RIMBP2
												TELO2	SYT3			CCNT1					LOC115493519	CASZ1		CYTH1											KLHL24					LIMS2								SNTN	RMI2
												TEN1	TAF1			CCSER2					LOC115493564	CBFA2T2		CZH5orf63											KLHL26					LMCD1								SORL1	RNF213
												TFEB	TBX22			CCT3					LOC115493583	CBL		DAB2											KLHL28					LMNA								SOX6	RPGR
												THUMPD1	TENM3			CCT4					LOC115493657	CBLN1		DAP3											LAMTOR2					LMO4								SOX7	RPGRIP1L
												TLDC2	TFRC			CCZ1					LOC115493658	CBX2		DBI											LAMTOR4					LMOD1								SPAM1	RPL29
												TM9SF2	TGFBR1			CD101					LOC115493768	CBX5		DBT											LAMTOR5					LMOD3								SRD5A2	RYR2
												TM9SF3	TJP1			CD109					LOC115493812	CBX8		DCAF1											LDLRAD1					LOC100190001								SREBF2	SAR1A
												TMEM14A	TLK1			CD247					LOC115493949	CCDC125		DCAF13											LGI1					LOC100190249								ST3GAL5	SASH1
												TMEM159	TMEM125			CD2AP					LOC115493952	CCDC14		DCAF4											LHFPL4					LOC100190467								ST6GALNAC2	SDHB
												TMEM178B	TMEM144			CD34					LOC115494014	CCDC148		DCAF7											LIMK1					LOC100190538								SULT1C4	SDR42E2
												TMEM74B	TMEM168			CD4					LOC115494107	CCDC172		DCTN3											LMF2					LOC100218025								SYTL1	SEC16A
												TMEM87A	TMEM245			CD40					LOC115494154	CCDC178		DCTN5											LMNB2					LOC100218088								TAOK3	SERF1A
												TMEM9B	TMEM37			CD7					LOC115494261	CCDC183		DDB1											LOC100190115					LOC100218607								TC2N	SETD1B
												TTC27	TMEM39A			CD80					LOC115494372	CCDC191		DDHD1											LOC100190348					LOC100218704								TFAP2B	SETD2
												TTC7B	TMEM67			CD83					LOC115494478	CCDC40		DDI2											LOC100190436					LOC100218918								TGIF1	SFMBT1
												TUBGCP5	TMSB4X			CD86					LOC115494484	CCDC51		DDX20											LOC100217511					LOC100219177								TGM2	SHISA3
												TUSC3	TNRC6A			CD96					LOC115494811	CCDC57		DDX25											LOC100218152					LOC100219184								TM6SF2	SHLD1
												TXNL4A	TPPP3			CD99L2					LOC115494852	CCDC58		DDX59											LOC100218354					LOC100219548								TMED6	SHPRH
												TYMP	TRAPPC9			CDC37L1					LOC115494915	CCDC60		DENND6A											LOC100218400					LOC100220758								TMEM139	SIPA1L2
												UBAC2	TRNAE-UUC			CDC42EP3					LOC115495053	CCDC61		DENR											LOC100218614					LOC100220869								TMEM213	SLC38A1
												UBAP2L	TRNAL-CAG			CDC42EP4					LOC115495081	CCDC73		DET1											LOC100219387					LOC100221364								TMEM269	SLC5A1
												UBE2M	TRNAM-CAU_7			CDCA2					LOC115495124	CCDC84		DGCR6L											LOC100220715					LOC100221408								TMEM72	SLC7A5
												UMPS	TRNAR-ACG_3			CDH10					LOC115495205	CCDC88A		DGCR8											LOC100220716					LOC100221701								TMPRSS2	SMARCA2
												VMA21	TRNAY-GUA_3			CDH15					LOC115495210	CCDC91		DHRS7B											LOC100220722					LOC100221949								TNFRSF18	SMG1
												VMP1	TSEN54			CDH22					LOC115495214	CCDC93		DIPK1B											LOC100220741					LOC100222067								TNFRSF6B	SNRPD1
												VPS33A	TTLL1			CDHR1					LOC115495268	CCK		DIPK1C											LOC100221437					LOC100222183								TNFSF10	SNRPG
												VPS35	TUBA1A			CDIP1					LOC115495280	CCL28		DIS3L2											LOC100221738					LOC100224290								TRPV4	SNW1
												WDR12	UBAP1L			CDK19					LOC115495699	CCNA1		DISP3											LOC100221763					LOC100224487								TSPAN1	SNX29
												WDR36	UPRT			CDK5RAP2					LOC115495748	CCNA2		DLGAP4											LOC100221838					LOC100225248								TSPAN8	SON
												WDR91	VPS53			CDK7					LOC115495770	CCNDBP1		DLGAP5											LOC100221946					LOC100225270								UPK1B	SPAG9
												WDR92	WBP4			CDK9					LOC115495803	CCNJ		DLK1											LOC100222013					LOC100225279								VILL	SPEN
												WNT1	WDR19			CDKN1C					LOC115495813	CCPG1		DMRTA2											LOC100222291					LOC100225782								VWA5B1	SPTAN1
												WWOX	ZBED4			CDKN3					LOC115495814	CCR4		DNAJC11											LOC100222296					LOC100225858								WDCP	STRN
												XRCC2	ZBTB41			CDON					LOC115495824	CCR5		DNAJC3											LOC100222691					LOC100226970								XIRP1	SUMO2
												YIPF4	ZBTB43			CDYL2					LOC115495829	CCR7		DNAJC6											LOC100223012					LOC100227464								ZNF750	SVEP1
												YWHAB	ZER1			CEBPG					LOC115495848	CD164		DNAJC7											LOC100223728					LOC100228351									SYNE2
												YWHAQ	ZFAT			CEL					LOC115495888	CD180		DNAL1											LOC100223798					LOC100228479									SYNE3
												ZC3H7A	ZFPM1			CELF1					LOC115495919	CD274		DNAL4											LOC100224019					LOC100228496									SYNJ1
												ZFHX3	ZNF185			CELF2					LOC115496162	CD28		DNALI1											LOC100224894					LOC100228682									SYNM
												ZMPSTE24	ZNF644			CELF5					LOC115496312	CD81		DNASE2B											LOC100226079					LOC100229347									TANC2
												ZMYND19	ZNF654			CELF6					LOC115496347	CDA		DNM1											LOC100226165					LOC100229375									TAOK1
												ZNF609				CELSR2					LOC115496349	CDC14B		DNM1L											LOC100226571					LOC100229402									TDRD6
																CENPL					LOC115496358	CDC20B		DOT1L											LOC100226843					LOC100229427									TET1
																CENPP					LOC115496366	CDC27		DPH7											LOC100226935					LOC100229528									TET2
																CENPQ					LOC115496437	CDC34		DPP10											LOC100227010					LOC100229913									TLN1
																CENPT					LOC115496738	CDC5L		DPP7											LOC100227231					LOC100230258									TLN2
																CENPU					LOC115496790	CDC73		DRAM1											LOC100227651					LOC100230295									TMEM250
																CEP170					LOC115496889	CDCA3		DRC3											LOC100228594					LOC100230348									TMPRSS9
																CEP290					LOC115496937	CDCA7L		DRD1											LOC100229107					LOC100230755									TNRC6B
																CEP63					LOC115496992	CDH17		DRD4											LOC100229648					LOC100231773									TOPAZ1
																CEP76					LOC115497098	CDH23		DSCAML1											LOC100229769					LOC100232219									TP53BP1
																CEP95					LOC115497121	CDH9		DTD1											LOC100230113					LOC100232364									TPR
																CERS4					LOC115497378	CDHR2		DTHD1											LOC100230587					LOC101233006									TRAF3
																CERS5					LOC115497401	CDK12		DUSP14											LOC100230903					LOC101233009									TRANK1
																CETN3					LOC115497519	CDK14		DVL1											LOC100230972					LOC101233072									TRIO
																CFAP161					LOC115497542	CDK15		DYDC1											LOC100231148					LOC101233268									TRIP11
																CFAP298					LOC115497596	CDK18		DYRK1A											LOC100231218					LOC101233820									TRNAQ-UUG
																CFAP300					LOC115497652	CDK2AP1		EDA2R											LOC100231862					LOC101233846									TRRAP
																CFAP57					LOC115497748	CDK5RAP1		EEF1AKMT3											LOC100231893					LOC101233900									TSC1
																CFAP97					LOC115497779	CDK5RAP3		EEF1AKMT4											LOC100232087					LOC101234091									TTC3
																CFDP1					LOC115497917	CDK8		EEF2K											LOC100232776					LOC105758586									TWF2
																CHAD					LOC115497924	CDKN2C		EFCAB7											LOC101233106					LOC105758620									UBR4
																CHCHD1					LOC115497938	CDR2		EFHC1											LOC101233224					LOC105758851									USP34
																CHCHD7					LOC115497993	CDR2L		EFHC2											LOC101233280					LOC105758854									USP49
																CHD2					LOC115498090	CEBPB		EFR3A											LOC101234180					LOC105759937									USP54
																CHD3					LOC115498214	CEBPZ		EFTUD2											LOC105758767					LOC105760310									USP9X
																CHD5					LOC116806707	CENPM		EGFL7											LOC105758845					LOC105760697									UTP20
																CHGB					LOC116806735	CENPW		EHD3											LOC105758858					LOC115490574									VPS13C
																CHIC2					LOC116806833	CEP104		EIF1B											LOC105758912					LOC115490751									VPS13D
																CHM					LOC116806960	CEP120		EIF2AK2											LOC105758956					LOC115490863									WDFY3
																CHMP2A					LOC116807009	CEP131		EIF2B2											LOC105759673					LOC115490899									WDR45B
																CHMP2B					LOC116807015	CEP164		EIF2S1											LOC105759762					LOC115491251									WIPF1
																CHMP6					LOC116807078	CEP250		EIF3E											LOC105760005					LOC115491489									WTIP
																CHORDC1					LOC116807089	CEP68		EIF3I											LOC105760726					LOC115492350									XRN1
																CHRDL1					LOC116807099	CEP78		EIF3J											LOC115490731					LOC115492383									YIPF3
																CHRNA10					LOC116807101	CEP85		EIF3L											LOC115490735					LOC115492501									YLPM1
																CHRNA2					LOC116807142	CER1		EIF4ENIF1											LOC115490753					LOC115492592									YPEL4
																CHST12					LOC116807151	CERK		EIF4H											LOC115490755					LOC115492664									ZBTB20
																CHST7					LOC116807154	CERS1		ELAVL2											LOC115490839					LOC115492670									ZBTB34
																CHSY3					LOC116807165	CERT1		ELOVL7											LOC115490930					LOC115492903									ZBTB37
																CIB1					LOC116807172	CFAP20DC		EMP2											LOC115490980					LOC115492965									ZC3H11A
																CIB2					LOC116807194	CFAP53		EMSY											LOC115491077					LOC115492979									ZDHHC8
																CIB3					LOC116807208	CFI		ENKUR											LOC115491109					LOC115493103									ZFYVE26
																CIBAR1					LOC116807366	CFLAR		ENOPH1											LOC115491164					LOC115493344									ZHX3
																CIDEC					LOC116807414	CGGBP1		ENOX2											LOC115491175					LOC115493477									ZNF236
																CISD1					LOC116807457	CHAC2		ENPP4											LOC115491190					LOC115493554									ZNF292
																CKAP2L					LOC116807471	CHAF1A		ENPP5											LOC115491200					LOC115493845									ZNF462
																CKAP4					LOC116807477	CHAF1B		ENPP6											LOC115491284					LOC115493898									ZNF516
																CLDN1					LOC116807579	CHAMP1		ENTR1											LOC115491304					LOC115493913									ZNF704
																CLDN14					LOC116807587	CHAT		EPB41L1											LOC115491449					LOC115494036									ZNFX1
																CLDN16					LOC116807620	CHCHD3		EPHA3											LOC115491506					LOC115494072									ZZEF1
																CLDN20					LOC116807661	CHEK2		EPN3											LOC115491507					LOC115494088									ZZZ3
																CLIC5					LOC116807745	CHMP1A		ERAL1											LOC115491573					LOC115494380
																CLIP1					LOC116807775	CHMP1B		ERG											LOC115491583					LOC115494466
																CLPTM1L					LOC116807906	CHMP4B		ERGIC3											LOC115491620					LOC115494545
																CLVS1					LOC116807943	CHPF2		ERLIN1											LOC115491624					LOC115494584
																CLVS2					LOC116807949	CHRAC1		ESM1											LOC115491650					LOC115494761
																CMC4					LOC116807965	CHRDL2		ESPL1											LOC115491654					LOC115494810
																CMPK1					LOC116808022	CHRM4		ESR2											LOC115491714					LOC115494833
																CNGA4					LOC116808125	CHRM5		ETF1											LOC115491738					LOC115494840
																CNN2					LOC116808129	CHRNA5		ETFA											LOC115491769					LOC115494841
																CNOT8					LOC116808130	CHST8		EXOC2											LOC115491788					LOC115494947
																CNTNAP1					LOC116808179	CHSY1		EXOC7											LOC115491799					LOC115495199
																COG1					LOC116808200	CHTF18		EXOG											LOC115491953					LOC115495222
																COG3					LOC116808231	CHTF8		EXOSC10											LOC115492129					LOC115495348
																COL13A1					LOC116808249	CIAO3		EXOSC9											LOC115492167					LOC115495379
																COL23A1					LOC116808261	CIC		EXT2											LOC115492406					LOC115495434
																COL27A1					LOC116808266	CIITA		EYS											LOC115492463					LOC115495435
																COL2A1					LOC116808505	CINP		EZH1											LOC115492572					LOC115495575
																COL8A1					LOC116808527	CISD2		F2R											LOC115492573					LOC115495744
																COL9A3					LOC116808529	CISH		F9											LOC115492685					LOC115495862
																COMMD4					LOC116808574	CIT		FAAH2											LOC115492854					LOC115496351
																COPS7A					LOC116808581	CKMT2		FAM131B											LOC115493087					LOC115496410
																COPS8					LOC116808630	CLASP1		FAM135B											LOC115493118					LOC115496473
																COPS9					LOC116808723	CLCN1		FAM160B1											LOC115493143					LOC115496556
																COQ4					LOC116808785	CLCN3		FAM161A											LOC115493161					LOC115496644
																CORO2B					LOC116808817	CLCN7		FAM166A											LOC115493162					LOC115496869
																CORT					LOC116808819	CLIC4		FAM189A1											LOC115493202					LOC115496872
																COX19					LOC116809001	CLINT1		FAM219B											LOC115493205					LOC115496933
																COX6C					LOC116809030	CLIP2		FAM32A											LOC115493459					LOC115497063
																CPA6					LOC116809066	CLNK		FAM53A											LOC115493466					LOC115497067
																CPB1					LOC116809088	CLOCK		FAM53B											LOC115493533					LOC115497134
																CPB2					LOC116809165	CLPB		FAM78A											LOC115493562					LOC115497248
																CPEB1					LOC116809173	CLRN1		FARP2											LOC115493616					LOC115497402
																CPEB2					LOC116809252	CLSPN		FASTKD5											LOC115493625					LOC115497456
																CPLX3					LOC116809306	CLSTN3		FAXC											LOC115493634					LOC115497648
																CPM					LOC116809311	CLUAP1		FBH1											LOC115493688					LOC115497718
																CPNE2					LOC116809317	CLUH		FBLN2											LOC115493719					LOC115497774
																CPNE7					LRR1	CMAS		FBXL17											LOC115493725					LOC115497787
																CPNE9					LRTM1	CMBL		FBXO5											LOC115493905					LOC115497824
																CPO					LY96	CMC1		FBXO7											LOC115493912					LOC115497903
																CPSF4L					LZTS2	CMSS1		FCF1											LOC115493927					LOC115497908
																CPT1B					MACROD2	CMYA5		FDPS											LOC115494015					LOC115497985
																CRACD					MAGI2	CNGA3		FDXACB1											LOC115494071					LOC115498317
																CRACDL					MAP11	CNGB3		FES											LOC115494161					LOC115498332
																CRACR2B					MAP1LC3B	CNIH3		FGD5											LOC115494257					LOC115498371
																CREB3					MAP2K1	CNNM4		FIGNL2											LOC115494313					LOC115498454
																CREBZF					MAP2K3	CNOT1		FITM2											LOC115494320					LOC115498489
																CRLF2					MAP6	CNOT10		FKBP4											LOC115494406					LOC115498512
																CRYBA2					MAP7D1	CNOT4		FLOT2											LOC115494448					LOC115498542
																CRYZ					MARS2	CNOT6		FLT3											LOC115494487					LOC116806599
																CRYZL1					MAS1	CNOT6L		FMNL2											LOC115494504					LOC116806848
																CSF3					MAX	CNP		FNDC10											LOC115494509					LOC116807057
																CSMD2					MBD1	CNPPD1		FNDC3A											LOC115494536					LOC116807175
																CSNK1G3					MCL1	CNPY3		FNDC3B											LOC115494609					LOC116807193
																CSRP2					MCOLN1	CNRIP1		FNIP2											LOC115494642					LOC116807214
																CSTB					MED29	CNST		FOXB1											LOC115494693					LOC116807284
																CTBP1					MED9	CNTN5		FOXN1											LOC115494834					LOC116807377
																CTDP1					MGAT1	CNTNAP4		FOXP1											LOC115494874					LOC116807409
																CTH					MICU1	COBLL1		FOXP2											LOC115494875					LOC116807439
																CTNNA2					MINAR1	COL22A1		FPGT											LOC115494890					LOC116807455
																CTNNBIP1					MIR1388	COL26A1		FRMD4A											LOC115494931					LOC116807486
																CTNND2					MIR2131	COL8A2		FSD2											LOC115494942					LOC116807610
																CUL1					MIR2965	COMMD3		FUBP1											LOC115495051					LOC116807621
																CUNH19orf57					MIR2972	COMTD1		FUNDC1											LOC115495082					LOC116807638
																CUX2					MIS12	COPG2		FXR1											LOC115495107					LOC116807646
																CXCR4					MNS1	COPRS		FZD1											LOC115495255					LOC116807680
																CXXC5					MOB3A	COQ10B		FZD7											LOC115495442					LOC116807684
																CYP2W1					MOCS3	COQ9		FZR1											LOC115495532					LOC116807689
																CYSRT1					MPP3	CORO1C		G3BP2											LOC115495593					LOC116807854
																CZH18orf25					MPPE1	CPAMD8		G6PC											LOC115495631					LOC116807883
																CZH9orf64					MRPL54	CPE		GABPA											LOC115495656					LOC116807898
																DACH2					MRPS12	CPN2		GABRA1											LOC115495690					LOC116807961
																DAG1					MRPS33	CPS1		GABRB3											LOC115495692					LOC116808020
																DALRD3					MSL1	CPSF1		GAD2											LOC115495754					LOC116808510
																DAP					MTA2	CPSF4		GALNS											LOC115495861					LOC116808512
																DAPP1					MTCH2	CRACR2A		GALNT1											LOC115496036					LOC116808588
																DAZL					MTF2	CRAT		GALNT11											LOC115496041					LOC116808615
																DCAF12					MTX1	CRB2		GALNT4											LOC115496043					LOC116808643
																DCAF6					MYBPC3	CRBN		GAPDH											LOC115496127					LOC116808660
																DCBLD1					MYO7B	CRCP		GAS1											LOC115496164					LOC116808729
																DCHS1					MYOC	CREB3L4		GATAD1											LOC115496212					LOC116808823
																DCK					N4BP2L1	CREBBP		GATB											LOC115496229					LOC116808849
																DCLK1					N4BP3	CREG1		GATM											LOC115496272					LOC116808995
																DCLK2					NAA25	CREG2		GCK											LOC115496479					LOC116809019
																DCST1					NAA38	CREM		GDAP2											LOC115496484					LOC116809081
																DCST2					NAB1	CRHBP		GDF2											LOC115496557					LOC116809196
																DCSTAMP					NAGK	CRISP2		GET1											LOC115496608					LOC116809199
																DCTD					NAP1L1	CRISPLD1		GET4											LOC115496636					LOC116809246
																DCTN6					NCAPH	CRK		GFI1B											LOC115496651					LOC116809251
																DCUN1D5					NCKAP5L	CRKL		GFM1											LOC115496707					LOXL2
																DDX4					NDC80	CRLS1		GIPC1											LOC115496794					LPAR4
																DDX41					NDUFA13	CRMP1		GJA8											LOC115496811					LPL
																DDX47					NDUFS5	CRNKL1		GJA9											LOC115496837					LRAT
																DDX52					NECTIN3	CROT		GJD4											LOC115496876					LRRC17
																DDX54					NEDD1	CRPPA		GLB1											LOC115496895					LRRC3C
																DDX56					NEMF	CRTAC1		GLP2R											LOC115496897					LRRTM4
																DEGS2					NEO1	CRYBA1		GLRX3											LOC115496915					LTBP2
																DELE1					NEU3	CRYBB2		GLT1D1											LOC115496924					LUM
																DENND10					NIP7	CRYBB3		GLTP											LOC115497106					LYPD6
																DENND1A					NMRAL1	CSDE1		GMFB											LOC115497162					LYVE1
																DENND2C					NMT2	CSMD1		GNL2											LOC115497208					LZTS1
																DEPDC1					NOP2	CSMD3		GNPTAB											LOC115497252					MAP3K20
																DEPDC1B					NR2C2AP	CSRNP1		GOLGA1											LOC115497297					MAPKAPK2
																DERA					NR2F6	CTDSP1		GOLGA7											LOC115497544					MARVELD1
																DERL2					NTPCR	CTDSPL		GOT1											LOC115497635					MATR3
																DESI1					NUAK1	CTIF		GOT2											LOC115497881					MCF2L
																DESI2					NUDT8	CTNNAL1		GPAT4											LOC115497956					MCRIP2
																DGKD					NYAP1	CTNNB1		GPATCH11											LOC115497968					MEGF6
																DHRS7					OGG1	CTNS		GPATCH2											LOC115497970					MEIS1
																DHRS9					OPTC	CTPS1		GPBP1L1											LOC115498017					MEOX2
																DHX16					OTOF	CTR9		GPC6											LOC115498147					MFAP4
																DHX33					PAIP2B	CTSE		GPR12											LOC115498294					MFAP5
																DIAPH3					PAK4	CTXN2		GPR155											LOC115498449					MFGE8
																DIO3					PALD1	CTXND1		GPR156											LOC115498559					MGLL
																DLAT					PARM1	CUL5		GPR17											LOC116806633					MIR181A-2
																DLEC1					PARP10	CUZD1		GPR176											LOC116806638					MISP
																DLG2					PBDC1	CWC25		GPR6											LOC116806648					MKX
																DLG3					PCBP2	CWF19L1		GPR61											LOC116806679					MMD
																DLGAP3					PCBP3	CWF19L2		GPR63											LOC116806685					MMP2
																DLX4					PCNA	CX3CL1		GPRC5B											LOC116806694					MMP28
																DMGDH					PCNP	CXCL14		GPX7											LOC116806736					MMRN2
																DMRT2					PCYOX1L	CXCR5		GRAMD1B											LOC116806744					MSC
																DMRT3					PELP1	CYP2AC7		GRAMD2B											LOC116806771					MSL2
																DMTN					PEMT	CYP2J19A		GRB10											LOC116806819					MSRB3
																DNA2					PEX19	CYRIA		GRIN2A											LOC116806829					MXRA7
																DNAAF3					PGAP3	CYS1		GRIP2											LOC116806865					MXRA8
																DNAAF4					PHF20	CYSLTR2		GSG1L2											LOC116806876					MYCT1
																DNAH17					PHF8	CYSTM1		GSK3B											LOC116806992					MYH10
																DNAH7					PHYHD1	CYTH4		GSS											LOC116807096					MYH11
																DNAJA2					PI4KA	CZH18orf32		GTF2E2											LOC116807170					MYL9
																DNAJB12					PIGZ	CZH5orf34		GTF2H1											LOC116807178					MYLK
																DNAJB14					PIK3R6	CZH5orf51		H6PD											LOC116807262					MYOCD
																DNAJB5					PITX1	CZH9orf85		HACD2											LOC116807277					NAPB
																DNAJB9					PIWIL2	D1DR		HACD4											LOC116807386					NAPRT
																DNAJC15					PKIG	D2HGDH		HAS3											LOC116807393					NCALD
																DNAJC16					PLAA	DAB1		HAT1											LOC116807405					NDP
																DNAJC2					PLEKHA3	DACH1		HBP1											LOC116807448					NDUFA4L2
																DNAJC21					PLEKHH3	DAGLB		HDAC8											LOC116807459					NES
																DNAJC28					PLIN2	DAPK1		HEATR5B											LOC116807470					NEURL1B
																DNAJC5					PLVAP	DAPK3		HEPACAM2											LOC116807507					NFIB
																DNER					PMS2	DAXX		HERC4											LOC116807642					NFKBIA
																DNMT3B					POLG	DAZAP1		HEXA											LOC116807678					NFU1
																DOCK11					POLR3F	DAZAP2		HHAT											LOC116807724					NGF
																DOCK3					POU3F4	DBF4B		HHATL											LOC116807731					NHSL2
																DPH2					PPM1D	DBNDD1		HHEX											LOC116807743					NIBAN2
																DPP9					PPP1R11	DBNL		HHIPL2											LOC116807806					NID1
																DPY19L4					PPP4R2	DBR1		HIBADH											LOC116807881					NID2
																DPYSL4					PPP4R4	DBX2		HINFP											LOC116808048					NKAIN2
																DRAM2					PRIM1	DCAF10		HK3											LOC116808049					NKX6-1
																DRD2					PRKAG3	DCLRE1A		HLTF											LOC116808114					NOS1AP
																DRD5					PROCR	DCLRE1B		HM13											LOC116808150					NOS3
																DRP2					PRR18	DCLRE1C		HMBS											LOC116808169					NR2F2
																DSCAM					PSMA2	DCPS		HMGN1											LOC116808181					NRP1
																DSE					PSPN	DCTN4		HMOX2											LOC116808183					NRP2
																DSG4					PTCH2	DCUN1D1		HNRNPH1											LOC116808208					NRTN
																DTWD1					PTF1A	DDHD2		HNRNPU											LOC116808222					NTN1
																DUOXA2					PTK2	DDIT4		HOMER2											LOC116808228					NTRK2
																DUSP12					PTMA	DDX1		HOOK1											LOC116808240					NUB1
																DYM					PTPN18	DDX10		HORMAD2											LOC116808428					NXPE3
																DYNC1LI1					PURA	DDX27		HP1BP3											LOC116808532					OAF
																DYNC2LI1					PYGO2	DDX31		HPS1											LOC116808547					OAZ2
																DYNLT1					QRFP	DDX3X		HS1BP3											LOC116808551					OGN
																E2F5					QTRT1	DDX42		HSD17B1											LOC116808590					OLFML1
																EAF1					RAB17	DDX5		HSDL2											LOC116808709					OLFML2B
																EAF2					RAB25	DDX55		HSF2											LOC116808710					OPA1
																EBF3					RAB7B	DDX58		HSP90B1											LOC116808719					OSR1
																EBI3					RABEP1	DEAF1		HSPA13											LOC116808725					OSTN
																EBNA1BP2					RABL3	DEF6		HTR1D											LOC116808747					OXTR
																ECE2					RAI2	DENND11		HTR2C											LOC116808843					P2RX1
																ECI1					RAP1GDS1	DENND4B		HTR4											LOC116808877					PALLD
																ECSCR					RARA	DERL3		HUNK											LOC116808883					PALM
																EDAR					RASSF2	DGCR2		IARS1											LOC116808886					PALMD
																EDC3					RBBP4	DGKK		IDH1											LOC116808894					PCDH1
																EDF1					RBMS2	DHDDS		IDH3A											LOC116808904					PCDH18
																EDRF1					RCCD1	DHODH		IDI1											LOC116808910					PDE2A
																EEF1A1					RCE1	DHRS13		IDS											LOC116808953					PDE4B
																EEF1AKNMT					RELT	DHX29		IFNAR2											LOC116808954					PDE9A
																EFNA3					REX1BD	DHX30		IFT46											LOC116808973					PDGFB
																EFNA5					RFC5	DHX32		IGF2											LOC116808976					PDGFC
																EFNB2					RGS17	DHX35		IHO1											LOC116808982					PDGFRA
																EGFL6					RHOBTB2	DHX37		IKZF3											LOC116809011					PDIA4
																EHMT1					RIOK3	DIABLO		IL13RA2											LOC116809098					PDLIM3
																EIF3F					RIOX1	DIAPH2		IL1B											LOC116809132					PEX16
																EIF4A3					RNF214	DIDO1		IL1R2											LOC116809168					PFKL
																EIF4B					RO60	DIO2		IL1RL1											LOC116809239					PGC
																EIF4E1B					RPE65	DIP2C		IL20RB											LOC116809285					PGGHG
																ELAC1					RPIA	DIPK2A		IL21R											LRBA					PHKA1
																ELAPOR1					RPL22L1	DIS3L		IL6ST											LRRC55					PHOSPHO1
																ELAVL1					RPS6KA6	DKC1		IL7											LSMEM2					PIGL
																ELL					RPS6KC1	DKK1		IMPDH2											LYPLA1					PIK3C2B
																ELMO3					RPTOR	DLK2		INHA											MACIR					PKD2
																ELOC					RPUSD3	DLST		INSYN2A											MAK16					PLA2G4A
																ELOF1					RRBP1	DLX6		INTS1											MAN1A1					PLCXD2
																EMILIN2					RSAD1	DMAC2L		INTS11											MAN2A2					PLK2
																EML1					RSRP1	DMBX1		INTS14											MAN2B2					PLPP2
																ENC1					RTN4R	DMRT1		INTS8											MANEA					PLTP
																ENDOG					RXRA	DMRTB1		IP6K3											MANF					PLXDC1
																ENGASE					SAXO1	DMXL2		IPO11											MAP3K21					PLXNC1
																ENPP1					SCYL1	DNAH9		IPO5											MAP9					PMP22
																ENTPD3					SDHD	DNAJA3		IPPK											MAPRE3					POLR2J
																ENTPD5					SDR39U1	DNAJA4		IQCG											MAT2B					POMT1
																ENTPD6					SEC22C	DNAJB1		IQCK											MBNL1					POPDC2
																ENTPD8					SEC23A	DNAJB2		IRAK1BP1											MCAT					PPDPF
																EPB41					SELENOH	DNAJC1		ISL2											MCF2L2					PPIL4
																EPB42					SELPLG	DNAJC10		IST1											MED1					PPP1R36
																EPC1					SEMA4C	DNAJC12		ITGA9											MED11					PPP1R3C
																EPG5					SERPINE2	DNAJC19		ITIH5											MED16					PPP3CA
																EPHB3					SF3A2	DNAJC8		ITPR1											MED28					PRELP
																EPHX1					SFN	DND1		ITPRIP											MEPCE					PRNP
																EPHX4					SFRP2	DNM3		JADE1											METTL1					PROKR1
																EPPK1					SFRP5	DNPEP		JAK1											MFAP1					PRPF18
																EPS15L1					SGTA	DNTTIP1		JAK3											MFHAS1					PRR36
																EPYC					SH2D2A	DOCK1		JAM3											MFSD8					PRRX1
																ERCC6					SH3GLB2	DOCK10		JPT1											MGMT					PRRX2
																ERCC6L					SHD	DOK2		KAT6A											MIR148A					PRSS56
																ERCC6L2					SHE	DOK4		KATNB1											MIR1756					PRTFDC1
																ERICH6					SHMT2	DOK6		KBTBD12											MIR1791					PTPN14
																ERLEC1					SIN3B	DOK7		KCNAB2											MIR2985-2					PTPN5
																ERMARD					SLC16A14	DPAGT1		KCNG3											MLH1					PTPRK
																ERN2					SLC19A3	DPF3		KCNJ1											MLLT6					PTTG1IP
																ERO1A					SLC25A39	DPH6		KCNJ3											MOGS					PXDC1
																ERO1B					SLC2A4RG	DPM1		KCNK15											MORC3					RAB22A
																ERP44					SLC30A5	DPP6		KCTD12											MPZL1					RAD21L1
																ETAA1					SLC35A1	DPYSL2		KCTD16											MRGBP					RAE1
																ETFB					SLC35A2	DRD3		KCTD17											MROH1					RALGDS
																ETS2					SLC35E4	DRG1		KCTD3											MRPL10					RAMP2
																ETV5					SLC48A1	DROSHA		KCTD8											MRPL12					RARG
																EVI2A					SLC50A1	DSG2		KHDRBS1											MRPL17					RARRES2
																EVPL					SLC66A1	DSTYK		KIAA0319L											MRPL2					RASD1
																EXOC3					SLC6A9	DTNB		KIAA0586											MRPL24					RBM46
																EXTL2					SLITRK2	DTWD2		KIAA0825											MRPL28					RBMS1
																EXTL3					SLMAP	DTX2		KIAA0895L											MRPL34					RECK
																F2					SMAD6	DUPD1		KIAA1614											MRPL41					RELL1
																F5					SMIM12	DUS1L		KIF1B											MRPL42					RER1
																F8					SMIM29	DUSP10		KIF27											MRPL49					RERG
																FABP5					SMOC2	DUSP11		KIF2C											MRPL51					RERGL
																FAF1					SMPD1	DUSP15		KIF6											MRPS15					RGMA
																FAF2					SMPD3	DUSP16		KIF9											MRPS16					RGS10
																FAM110A					SMTNL1	DUSP19		KLF3											MRPS18B					RHOC
																FAM118A					SNX33	DUSP28		KLHDC10											MRPS18C					RHOG
																FAM118B					SOCS5	DUSP3		KLHDC2											MRPS23					RHOJ
																FAM163B					SORBS3	DUSP4		KLHDC3											MRPS24					RIMKLB
																FAM167A					SOWAHD	DUSP5		KLHL12											MRTFA					RIMS3
																FAM168B					SOX12	DUSP6		KLHL14											MRTO4					RIOK2
																FAM172A					SPATA2L	DUT		KLHL17											MST1					RNF208
																FAM183A					SPOCK2	DYNLRB1		KPNA4											MSX2					ROBO4
																FAM187A					SPRYD3	DYRK2		KPNB1											MTDH					RPH3A
																FAM189B					SRSF7	DZIP1		KREMEN1											MTMR8					RPRM
																FAM204A					ST6GALNAC6	E2F3		LAMA3											MVD					RPS6KB2
																FAM20C					STARD7	E2F8		LAMA4											MXD1					RUNX1
																FAM210B					STIM1	EARS2		LAMP2											MYADML2					RUSC1
																FAM214A					STXBP1	EBF2		LANCL3											MYO10					S100A11
																FAM222A					SUOX	ECEL1		LAP3											MYO1E					SCARF1
																FAM234A					SYF2	EDEM3		LARP1B											MYO5C					SCARF2
																FAM3D					SYPL2	EDN1		LASP1											MYT1L					SDC2
																FAM78B					TAF1B	EED		LCTL											NAA40					SDC3
																FAM83H					TARS2	EEF1AKMT2		LDAH											NABP2					SDSL
																FAM98B					TASP1	EFCAB14		LDB1											NACA					SEC31A
																FANCE					TBC1D22A	EFHD2		LEF1											NAXE					SELENOP
																FANCG					TBC1D23	EFL1		LEPROT											NCOA2					SEMA3F
																FANCM					TBP	EHBP1		LGALSL											NCSTN					SEMA4G
																FARP1					TECTB	EHHADH		LIF											NDUFA2					SENP7
																FASLG					TEPSIN	EIF2A		LIMCH1											NDUFB4					SEPTIN4
																FASTKD1					TFB2M	EIF2AK1		LIN52											NDUFB6					SEPTIN7
																FASTKD3					TGFA	EIF2B1		LIN7C											NDUFB7					SERPIND1
																FBLIM1					THOP1	EIF2B4		LINGO3											NDUFS8					SERPINF1
																FBN1					TICAM1	EIF2B5		LMAN2											NEK8					SERPINH1
																FBN2					TIMM10B	EIF3B		LNPK											NEMP2					SESN1
																FBXL16					TLE5	EIF3D		LOC100189932											NFIC					SFRP1
																FBXL21P					TMC5	EIF4A2		LOC100190031											NFYC					SGSM1
																FBXL5					TMC6	EIF4E		LOC100190143											NHLRC2					SH2B3
																FBXO2					TMCO6	EIF4E2		LOC100190440											NHP2					SH2D3C
																FBXO28					TMED7	EIF4G3		LOC100190573											NICN1					SHISA4
																FBXO3					TMEM101	EIF6		LOC100217839											NKX3-1					SLC26A9
																FBXO4					TMEM120A	ELAC2		LOC100217858											NME6					SLC35F5
																FBXO41					TMEM132E	ELAPOR2		LOC100217876											NOB1					SLC37A2
																FBXO47					TMEM222	ELF1		LOC100217895											NOC3L					SLC6A11
																FBXO9					TMEM230	ELFN1		LOC100218092											NOP56					SLC8A1
																FBXW4					TMEM35B	ELK3		LOC100218405											NPLOC4					SLC9A3R2
																FBXW7					TMEM88B	ELK4		LOC100218808											NPTX1					SLC9A7
																FCHO2					TMPRSS3	ELMOD2		LOC100218829											NPW					SLIT3
																FCHSD1					TMUB2	ELMOD3		LOC100218870											NPY4R2					SLITRK3
																FEM1C					TNFRSF21	ELOA		LOC100218989											NPY5R					SMAD1
																FERD3L					TNPO1	ELOVL3		LOC100219101											NRF1					SMAGP
																FETUB					TOLLIP	ELOVL4		LOC100219254											NRIP1					SMO
																FGD4					TOMM70	ELOVL6		LOC100219379											NUDT16L1					SNAI1
																FGF12					TOX2	ELP3		LOC100219422											NUP153					SNAI2
																FGF16					TP53RK	ELP6		LOC100219721											NUP98					SNRNP200
																FGF20					TPGS2	EMC7		LOC100219761											NXF1					SOD3
																FGF4					TRA2B	EMILIN3		LOC100219791											ODF3B					SOGA1
																FGFR1					TRIM23	EN1		LOC100219825											OGDH					SOX18
																FHOD3					TRIM45	ENHO		LOC100219865											OST4					SPARC
																FIBCD1					TRMT12	ENOX1		LOC100220079											OTOR					SPEG
																FICD					TRMT61B	ENPP7		LOC100220117											OTUB1					SPRY1
																FIGN					TRPC1	EOMES		LOC100220162											OTULINL					SPRY2
																FIP1L1					TSHR	EPC2		LOC100220296											OVCA2					SPRY4
																FKBP3					TSNAX	EPHA10		LOC100220302											OXSR1					SPTLC2
																FKBP8					TSPAN5	EPHA7		LOC100220381											PA2G4					SRSF5
																FKTN					TSTD2	EPHA8		LOC100220454											PAICS					SSPN
																FLAD1					TTC31	EPHB2		LOC100220484											PAK2					SSTR1
																FLCN					TYSND1	EPN2		LOC100220603											PAQR3					ST3GAL1
																FLNC					UBALD2	ERCC4		LOC100220727											PARPBP					ST3GAL2
																FLOT1					UBE3A	ERGIC1		LOC100220872											PCNX4					ST6GALNAC1
																FLT1					UBTD1	ERI2		LOC100220938											PDK2					ST8SIA5
																FLT4					UBTF	ERRFI1		LOC100221075											PDYN					STARD3NL
																FMN2					UBXN10	ESF1		LOC100221179											PELI1					STON1
																FMNL1					UCHL3	ESPN		LOC100221217											PEX1					STT3A
																FN3KRP					UFSP2	ESPNL		LOC100221249											PFKM					SUSD4
																FNDC4					UGCG	ESRP2		LOC100221705											PGAM1					SYNGR2
																FOSL2					UPF2	ESRRB		LOC100221796											PGAP1					SYNPO
																FOXA2					USF1	ESS2		LOC100221871											PGAP2					SYNPO2
																FOXD3					USHBP1	ESYT3		LOC100221970											PGLS					TACR1
																FOXF1					USP43	ETFDH		LOC100222002											PGPEP1					TACR3
																FOXF2					USP6NL	ETV1		LOC100222254											PHC2					TAGLN
																FOXK2					VASN	ETV3		LOC100222342											PHKA2					TAMM41
																FOXL2					WDR24	ETV6		LOC100222730											PHKG1					TBX2
																FOXO4					WDR4	EVC2		LOC100222777											PI4K2A					TBXA2R
																FRMD7					WDR76	EXOC4		LOC100222819											PIGN					TCF21
																FRMPD3					WNT2B	EXOC8		LOC100223308											PIN4					TCF7L1
																FRRS1					ZBTB7A	EYA1		LOC100223320											PITPNM1					TCHP
																FRS3					ZC3H10	EYA3		LOC100223410											PLCL1					TCIM
																FSBP					ZC3H12A	EYA4		LOC100223967											PLCL2					TDRD7
																FSCN1					ZDBF2	F13A1		LOC100224489											PLOD2					TEK
																FSHB					ZDHHC20	F2RL1		LOC100224572											PLPP6					TEX12
																FSIP2					ZDHHC23	F2RL3		LOC100224575											PLXNB2					TGFBR2
																FUCA1					ZDHHC5	FABP1		LOC100224616											PMVK					TGFBR3
																FUT9					ZNF362	FADD		LOC100224770											PNPO					THAP12
																GABBR2					ZNF653	FAH		LOC100224801											POLR2B					THBD
																GABRA4					ZNHIT6	FAIM2		LOC100224802											POLR2G					THBS1
																GABRB1					ZNRD2	FAM110C		LOC100224825											POLR3D					THBS2
																GABRP						FAM114A2		LOC100224972											PORCN					THBS3
																GABRR3						FAM126B		LOC100225050											PPP1CA					THY1
																GADD45G						FAM13B		LOC100225057											PPP1R12B					TIE1
																GAK						FAM155B		LOC100225194											PPP2CB					TIMP2
																GALE						FAM163A		LOC100225337											PPP2R1A					TIMP3
																GALM						FAM171A1		LOC100225471											PPP2R2C					TIMP4
																GALNT13						FAM171B		LOC100225584											PPP6C					TINAGL1
																GALNT18						FAM174B		LOC100225683											PPP6R2					TM4SF18
																GALNT2						FAM184B		LOC100225801											PRCC					TMA16
																GALNT5						FAM185A		LOC100226032											PRDM5					TMEM100
																GAPVD1						FAM193A		LOC100226551											PRKAB2					TMEM150A
																GARS1						FAM20B		LOC100226582											PRKAG1					TMEM179
																GASK1B						FAM210A		LOC100227069											PRKCZ					TMEM200B
																GATA3						FAM214B		LOC100227365											PRPF39					TMEM204
																GATAD2A						FAM222B		LOC100227411											PRSS57					TMEM275
																GBGT1						FAM237A		LOC100227536											PSMB3					TMEM50B
																GCDH						FAM241A		LOC100227828											PSMB4					TMEM59L
																GCG						FAM72A		LOC100227831											PSMD13					TMEM86A
																GCG2						FAM76A		LOC100227872											PSMD3					TMEM97
																GCNA						FAM76B		LOC100228420											PTAR1					TNC
																GCNT2						FAM83A		LOC100228587											PTDSS1					TNFAIP2
																GCNT4						FAM83C		LOC100228906											PTGES3					TNFAIP6
																GDAP1L1						FAM91A1		LOC100228958											PTGES3L					TNFAIP8L3
																GDF1						FAM98A		LOC100228959											PTPN22					TNS1
																GDNF						FANCC		LOC100229020											PTPN7					TNS2
																GDPD1						FANCI		LOC100229115											PUF60					TOMM5
																GDPGP1						FANCL		LOC100229438											PUM2					TPM1
																GEMIN2						FARS2		LOC100229557											PURB					TRIM47
																GEMIN4						FARSB		LOC100229572											PXDN					TRMT10C
																GEMIN5						FAT2		LOC100229676											PXMP4					TRNAM-CAU_3
																GEMIN8						FAT4		LOC100229718											PYURF					TRNAS-AGA_2
																GFER						FBLN7		LOC100230051											QKI					TSC22D3
																GFI1						FBXL14		LOC100230284											QPCTL					TSPAN14
																GFM2						FBXL18		LOC100230310											QSOX1					TSPAN18
																GFPT1						FBXO11		LOC100230872											RAB39B					TTC30B
																GGCT						FBXO16		LOC100230988											RAB3GAP1					TWIST1
																GGCX						FBXO25		LOC100231076											RAB3GAP2					TWIST2
																GGNBP2						FBXO34		LOC100231284											RAB43					TWSG1
																GGPS1						FBXO38		LOC100231317											RABIF					TXN
																GGT7						FBXO39		LOC100231572											RAD23A					TXNIP
																GHR						FBXO43		LOC100231678											RALB					UBLCP1
																GID8						FBXO45		LOC100231709											RALYL					UNC5B
																GIN1						FBXO48		LOC100232073											RBL1					USO1
																GINS1						FBXW11		LOC100232247											RCHY1					VASH1
																GIPR						FBXW2		LOC100232358											REEP6					VCL
																GLCCI1						FCHSD2		LOC100232533											RELA					VEPH1
																GLCE						FDFT1		LOC100232745											RET					VIM
																GLDC						FDX1		LOC100232832											REV1					VSIR
																GLE1						FEM1A		LOC101233028											RFXANK					VWA3A
																GLIPR1						FER1L5		LOC101233348											RNF126					VWCE
																GLIS3						FGD2		LOC101233446											RNF139					WNT5B
																GLOD4						FGF10		LOC101233572											RNF212B					YAP1
																GLRA1						FGF13		LOC101233594											ROCK2					ZBBX
																GLT8D2						FGF5		LOC101233656											RPA1					ZBTB47
																GLUL						FGFR1OP2		LOC101233722											RPL12					ZCCHC24
																GMPPA						FGGY		LOC101233849											RPL13A					ZDHHC4
																GMPR						FH		LOC101234054											RPL22					ZEB2
																GNA11						FHAD1		LOC101234056											RPL35					ZFP36L2
																GNAL						FHDC1		LOC101234119											RPL6					ZMYND11
																GNAS						FHIT		LOC105758514											RPP21					ZNF703
																GNB3						FJX1		LOC105758603											RPRML					ZNF710
																GNPDA2						FKBP7		LOC105758678											RPS26					ZYX
																GNRH1						FKBP9		LOC105758763											RPS27
																GOLM1						FMN1		LOC105758793											RPS29
																GOLPH3						FNBP1		LOC105758842											RPS6KA3
																GOLT1A						FOSB		LOC105758914											RRP8
																GOLT1B						FOXD1		LOC105758993											RRS1
																GOPC						FOXE1		LOC105758998											RTKN
																GOSR1						FOXE3		LOC105759009											RWDD1
																GPALPP1						FOXJ1		LOC105759036											S100A13
																GPATCH1						FOXN3		LOC105759069											SATB2
																GPBP1						FOXO1		LOC105759097											SBNO1
																GPC5						FOXP4		LOC105759159											SCAF4
																GPD2						FPGS		LOC105759165											SCG3
																GPNMB						FREM2		LOC105759171											SCRIB
																GPR119						FRMD3		LOC105759175											SCRN1
																GPR171						FSD1L		LOC105759356											SDF2
																GPR179						FSTL1		LOC105759403											SDHC
																GPR37L1						FSTL4		LOC105759945											SEC24B
																GPR50						FTSJ3		LOC105760177											SEC24C
																GPR52						FUT10		LOC105760210											SEMA3E
																GPR75						FXN		LOC105760267											SEMA3G
																GPR87						FXYD2		LOC105760446											SENP1
																GRAMD2A						FYTTD1		LOC105760754											SERINC5
																GRAP						FZD10		LOC105760861											SERPINF2
																GRAP2						FZD5		LOC105760879											SESN3
																GREB1						G2E3		LOC105760944											SETD7
																GREM2						G3BP1		LOC115490562											SF3B4
																GRHPR						GAA		LOC115490603											SGCA
																GRIK3						GAB1		LOC115490612											SHARPIN
																GRIK4						GABRG1		LOC115490633											SHC1
																GRIN1						GAL3ST2		LOC115490701											SIDT2
																GRIN2B						GALK2		LOC115490769											SIRT6
																GRIN2D						GALNT16		LOC115490795											SLC12A1
																GRIN3B						GALNT17		LOC115490836											SLC17A8
																GRK7						GALNT3		LOC115490876											SLC22A15
																GRM8						GALNT6		LOC115490886											SLC25A5
																GRTP1						GALR2		LOC115490979											SLC35B1
																GRXCR1						GALT		LOC115491002											SLC35F2
																GSDME						GANAB		LOC115491004											SLC38A6
																GSTCD						GAREM1		LOC115491022											SLC41A2
																GSX1						GARNL3		LOC115491037											SLC4A1AP
																GTF2E1						GART		LOC115491081											SLC7A2
																GTF2I						GBF1		LOC115491108											SMARCAD1
																GTPBP2						GBX1		LOC115491132											SMC1B
																GTPBP4						GCHFR		LOC115491156											SNAPIN
																GTPBP8						GCLC		LOC115491159											SND1
																GUCA1A						GCM1		LOC115491176											SNRNP25
																GXYLT2						GDA		LOC115491183											SNRNP27
																GZF1						GDE1		LOC115491197											SNRPA1
																HABP2						GDF10		LOC115491210											SNX1
																HACL1						GDF5		LOC115491224											SNX12
																HAPLN1						GDPD2		LOC115491230											SNX13
																HAUS1						GFRA1		LOC115491243											SNX27
																HBE1						GFRA2		LOC115491257											SNX9
																HBEGF						GGA1		LOC115491432											SOCS1
																HCN1						GGA3		LOC115491623											SOCS6
																HCN4						GGT1		LOC115491660											SP1
																HDGFL3						GHSR		LOC115491745											SP2
																HDHD5						GIGYF2		LOC115491889											SP5
																HEATR1						GIMD1		LOC115491915											SPCS3
																HEMGN						GINS2		LOC115491922											SPOPL
																HES4						GINS4		LOC115492069											SPTLC1
																HGF						GIPC3		LOC115492315											SPX
																HGS						GIT2		LOC115492352											SREK1
																HIF1AN						GJB7		LOC115492353											SRRM3
																HIKESHI						GJC1		LOC115492382											SSBP4
																HIP1R						GJE1		LOC115492397											SSU72
																HIPK2						GLA		LOC115492560											STAM
																HMCN1						GLB1L		LOC115493031											STAT6
																HMCN2						GLDN		LOC115493091											STBD1
																HMG20A						GLIS1		LOC115493093											STC2
																HMGCR						GLOD5		LOC115493104											STK26
																HMGN5						GLP1R		LOC115493121											STK4
																HMGXB4						GMEB2		LOC115493141											STRA6
																HMX2						GMNC		LOC115493223											STRIT1
																HNF1A						GNAT1		LOC115493342											STRN3
																HNRNPH3						GNAT2		LOC115493346											STUB1
																HNRNPK						GNAT3		LOC115493382											STUM
																HOMER1						GNB4		LOC115493406											STX5
																HOMER3						GNB5		LOC115493427											SUPT4H1
																HOOK2						GNE		LOC115493442											SVBP
																HOOK3						GNG12		LOC115493488											SYCP2
																HORMAD1						GNG13		LOC115493512											SYN2
																HOXA11						GNG2		LOC115493528											SYNCRIP
																HOXB3						GNG4		LOC115493559											SYT11
																HOXC12						GNG5		LOC115493602											TADA3
																HOXD10						GNG7		LOC115493620											TAF10
																HOXD3						GNL3		LOC115493621											TAF6L
																HPCA						GNMT		LOC115493626											TAF9B
																HPD						GNPTG		LOC115493635											TBC1D10A
																HPS6						GOLPH3L		LOC115493640											TBC1D13
																HRH2						GORAB		LOC115493659											TBC1D2B
																HRH3						GORASP2		LOC115493665											TBCD
																HS3ST2						GOSR2		LOC115493667											TBRG4
																HS3ST5						GP9		LOC115493670											TECR
																HSCB						GPAT2		LOC115493684											TENT2
																HSD17B3						GPATCH2L		LOC115493705											TERF2
																HSF2BP						GPATCH3		LOC115493709											TEX264
																HSP90AA1						GPC1		LOC115493715											TFAM
																HSPA14						GPC3		LOC115493718											THAP11
																HSPB3						GPI		LOC115493732											TIFA
																HTATIP2						GPN2		LOC115493743											TJP3
																HTRA3						GPN3		LOC115493746											TKFC
																IAPP						GPR132		LOC115493810											TMBIM6
																IARS2						GPR137C		LOC115493814											TMCC2
																ICMT						GPR146		LOC115493816											TMEM106B
																ICOSLG						GPR148		LOC115493840											TMEM109
																ID4						GPR15		LOC115493857											TMEM115
																IER5						GPR157		LOC115493889											TMEM121B
																IFI35						GPR161		LOC115493894											TMEM127
																IFRD2						GPR162		LOC115493915											TMEM141
																IFT20						GPR19		LOC115493936											TMEM161B
																IFT52						GPR26		LOC115494021											TMEM165
																IFT57						GPR27		LOC115494059											TMEM229B
																IFT74						GPR39		LOC115494062											TMEM25
																IFT80						GPR55		LOC115494089											TMEM26
																IFT81						GPR82		LOC115494092											TMEM54
																IGFALS						GPR85		LOC115494094											TMIGD1
																IGSF10						GPRIN3		LOC115494099											TMTC4
																IGSF11						GRAMD4		LOC115494127											TMUB1
																IGSF9B						GRHL1		LOC115494136											TMX2
																IKBKB						GRHL3		LOC115494249											TMX3
																IKZF1						GRIA3		LOC115494254											TMX4
																IL11RA						GRID2IP		LOC115494264											TNFRSF8
																IL17B						GRIK1		LOC115494276											TNFSF4
																IL18						GRIK2		LOC115494302											TNKS1BP1
																IL18RAP						GRIN3A		LOC115494314											TNPO2
																IL1RAP						GRK6		LOC115494328											TNPO3
																IL22RA2						GRM3		LOC115494358											TNS3
																IL31RA						GRPEL2		LOC115494366											TOMM6
																IL4R						GRXCR2		LOC115494373											TRA2A
																IL6						GSG1L		LOC115494446											TRAF6
																ILRUN						GSPT1		LOC115494454											TRAF7
																ILVBL						GSR		LOC115494503											TRIM3
																IMPG2						GTDC1		LOC115494511											TRNAD-GUC_5
																INIP						GTF3C2		LOC115494525											TRNAL-CAA
																INKA2						GTF3C4		LOC115494586											TRPT1
																INO80B						GTF3C6		LOC115494669											TRPV3
																INSIG2						GTPBP1		LOC115494684											TTC24
																INTS12						GTPBP10		LOC115494703											TTC33
																INVS						GUCA1C		LOC115494719											TTC5
																IPO8						GUCY1B1		LOC115494735											TTYH3
																IQCB1						GUF1		LOC115494748											TUBB4B
																IQSEC1						HABP4		LOC115494758											TXN2
																IREB2						HAGH		LOC115494805											UBA1
																ISL1						HAP1		LOC115494870											UBALD1
																ISOC1						HAPLN2		LOC115494886											UBE2C
																ITFG1						HAPLN4		LOC115494899											UBE2D1
																ITGA2B						HASPIN		LOC115494903											UBE2V2
																ITGA8						HAUS6		LOC115494917											UBE3C
																ITGB1BP2						HAX1		LOC115494924											UBL5
																ITGB8						HCRTR2		LOC115494946											UBL7
																ITM2C						HDAC3		LOC115494950											UBR2
																ITPKB						HDC		LOC115495004											UBXN1
																ITPR3						HDDC3		LOC115495037											UNC45A
																IWS1						HDGFL2		LOC115495101											UQCR10
																IYD						HDX		LOC115495102											UQCR11
																JAKMIP3						HECTD3		LOC115495110											USP21
																JAML						HELQ		LOC115495121											USP39
																JAZF1						HERC3		LOC115495212											UTP14A
																JMY						HGSNAT		LOC115495236											UTP4
																JOSD1						HIP1		LOC115495237											VPS4A
																JUP						HIVEP1		LOC115495241											WDR33
																KANK1						HIVEP2		LOC115495243											WWP2
																KANSL2						HLCS		LOC115495254											XKR8
																KANSL3						HMGB3		LOC115495276											XPO6
																KAT2A						HMGCLL1		LOC115495286											XPO7
																KATNA1						HMGXB3		LOC115495293											XRCC1
																KATNAL2						HMX3		LOC115495316											YARS1
																KCNA2						HNRNPA1		LOC115495366											YBX3
																KCNAB1						HNRNPDL		LOC115495463											YES1
																KCNC1						HNRNPM		LOC115495471											YKT6
																KCNC2						HOPX		LOC115495512											YTHDC1
																KCNC4						HOXA13		LOC115495534											YTHDF3
																KCND3						HOXB1		LOC115495537											YWHAG
																KCNH1						HOXC13		LOC115495583											ZBTB17
																KCNH6						HOXD11		LOC115495613											ZC3H3
																KCNIP2						HOXD12		LOC115495621											ZDHHC12
																KCNK1						HPCAL4		LOC115495647											ZDHHC17
																KCNK2						HPDL		LOC115495681											ZDHHC21
																KCNN1						HPGDS		LOC115495722											ZFAND3
																KCNN3						HS3ST6		LOC115495750											ZFC3H1
																KCNQ3						HS6ST1		LOC115495771											ZFP64
																KCNQ4						HS6ST2		LOC115495795											ZMAT4
																KCTD10						HSBP1L1		LOC115495811											ZNF207
																KCTD9						HSD17B7		LOC115495845											ZNF330
																KDM3A						HSDL1		LOC115495867											ZNF346
																KDM5B						HSPA12A		LOC115495894											ZNF407
																KERA						HSPA5		LOC115495907											ZNF513
																KIAA0232						HSPB11		LOC115495957											ZNF589
																KIAA0319						HSPBAP1		LOC115495974											ZNRF1
																KIAA0753						HSPH1		LOC115495989											ZPR1
																KIAA1143						HTR1F		LOC115495990
																KIAA1522						HTR2A		LOC115495998
																KIAA1671						HTR5A		LOC115496006
																KIAA1755						HTR6		LOC115496017
																KIF21B						HTR7		LOC115496025
																KIF2A						HYAL4		LOC115496033
																KIRREL1						HYLS1		LOC115496034
																KLF10						HYOU1		LOC115496037
																KLF11						IBSP		LOC115496039
																KLF4						ICAM5		LOC115496040
																KLF8						IDNK		LOC115496051
																KLHL20						IDUA		LOC115496071
																KLHL30						IFFO2		LOC115496092
																KLHL33						IFNAR1		LOC115496093
																KLHL34						IFNLR1		LOC115496160
																KLHL38						IFT122		LOC115496207
																KLHL4						IFT22		LOC115496223
																KLHL41						IGF1R		LOC115496233
																KMT5A						IGF2BP3		LOC115496249
																KNOP1						IGFBP5		LOC115496253
																KNTC1						IGFN1		LOC115496261
																KPNA3						IGSF5		LOC115496278
																KPNA7						IK		LOC115496291
																KRI1						IL12RB1		LOC115496310
																L2HGDH						IL15		LOC115496348
																L3MBTL1						IL16		LOC115496360
																LACTB2						IL17RC		LOC115496365
																LAMB4						IL1RAPL2		LOC115496367
																LAMC2						IL20RA		LOC115496387
																LARP7						IL21		LOC115496398
																LAYN						IL2RG		LOC115496402
																LBH						ILF3		LOC115496405
																LBX1						INA		LOC115496409
																LCA5						INAFM2		LOC115496415
																LCMT1						INAVA		LOC115496426
																LCMT2						INCENP		LOC115496433
																LCOR						ING1		LOC115496436
																LCP1						ING2		LOC115496452
																LDLRAD3						ING4		LOC115496454
																LEP						ING5		LOC115496457
																LEPR						INHBA		LOC115496469
																LETM2						INO80D		LOC115496478
																LETMD1						INPP5D		LOC115496519
																LGALS3						INPP5E		LOC115496563
																LHFPL2						INPP5F		LOC115496566
																LHX8						INSL5		LOC115496574
																LIMA1						INSR		LOC115496581
																LINS1						INTS2		LOC115496582
																LITAF						INTS9		LOC115496586
																LITAFD						INTU		LOC115496622
																LLGL2						IP6K2		LOC115496668
																LMBRD2						IPO9		LOC115496733
																LNP1						IQCD		LOC115496737
																LOC100189933						IQCH		LOC115496741
																LOC100189939						IQSEC3		LOC115496795
																LOC100189956						IRAK2		LOC115496802
																LOC100189978						IRF2		LOC115496820
																LOC100190237						IRF6		LOC115496834
																LOC100190340						IRS1		LOC115496841
																LOC100190491						IRS2		LOC115496849
																LOC100190622						IRX4		LOC115496891
																LOC100190699						ISCA2		LOC115496893
																LOC100190718						ISG20L2		LOC115496917
																LOC100217562						ISM1		LOC115496923
																LOC100217613						ITGB3BP		LOC115496944
																LOC100217691						ITGBL1		LOC115496947
																LOC100217780						ITIH2		LOC115496966
																LOC100217831						ITPRIPL2		LOC115496978
																LOC100217864						ITSN1		LOC115496990
																LOC100217918						JAM2		LOC115496997
																LOC100217958						JCAD		LOC115497000
																LOC100218075						JHY		LOC115497003
																LOC100218246						JKAMP		LOC115497017
																LOC100218271						JMJD1C		LOC115497033
																LOC100218287						JPT2		LOC115497040
																LOC100218308						KANSL1		LOC115497065
																LOC100218462						KAT6B		LOC115497072
																LOC100218480						KAT8		LOC115497108
																LOC100218590						KBTBD3		LOC115497117
																LOC100218635						KBTBD4		LOC115497146
																LOC100218691						KCNE2		LOC115497166
																LOC100218792						KCNE3		LOC115497171
																LOC100218826						KCNH5		LOC115497172
																LOC100218848						KCNH7		LOC115497181
																LOC100218902						KCNJ11		LOC115497185
																LOC100218943						KCNJ13		LOC115497227
																LOC100218944						KCNJ4		LOC115497258
																LOC100219030						KCNK5		LOC115497275
																LOC100219073						KCNQ2		LOC115497288
																LOC100219169						KCNS1		LOC115497329
																LOC100219182						KCNT1		LOC115497375
																LOC100219277						KCNV1		LOC115497412
																LOC100219615						KCTD15		LOC115497442
																LOC100219814						KCTD18		LOC115497443
																LOC100219821						KCTD20		LOC115497444
																LOC100219846						KCTD6		LOC115497451
																LOC100219970						KDF1		LOC115497479
																LOC100219992						KDM1A		LOC115497531
																LOC100220064						KDM2B		LOC115497546
																LOC100220151						KDM4A		LOC115497597
																LOC100220191						KDM4B		LOC115497602
																LOC100220263						KDM8		LOC115497607
																LOC100220399						KHDRBS2		LOC115497647
																LOC100220410						KHSRP		LOC115497650
																LOC100220412						KIAA0100		LOC115497653
																LOC100220427						KIAA0556		LOC115497656
																LOC100220543						KIAA1109		LOC115497681
																LOC100220617						KIAA1549		LOC115497737
																LOC100220647						KIAA1841		LOC115497739
																LOC100220760						KIAA2013		LOC115497760
																LOC100220790						KIF1A		LOC115497761
																LOC100220807						KIF20A		LOC115497766
																LOC100220846						KIF20B		LOC115497768
																LOC100220969						KIF23		LOC115497800
																LOC100220978						KIF4A		LOC115497810
																LOC100221073						KIF7		LOC115497825
																LOC100221170						KIFC3		LOC115497828
																LOC100221256						KIRREL3		LOC115497830
																LOC100221324						KLC4		LOC115497832
																LOC100221337						KLF13		LOC115497837
																LOC100221377						KLF5		LOC115497839
																LOC100221380						KLF7		LOC115497864
																LOC100221382						KLF9		LOC115497885
																LOC100221565						KLHDC1		LOC115497906
																LOC100221697						KLHDC7A		LOC115497911
																LOC100221782						KLHDC8B		LOC115497918
																LOC100221837						KLHL10		LOC115497925
																LOC100221884						KLHL13		LOC115497928
																LOC100221905						KLHL15		LOC115497936
																LOC100221933						KLHL18		LOC115497946
																LOC100221991						KLHL21		LOC115497955
																LOC100222056						KLHL23		LOC115497987
																LOC100222111						KLHL25		LOC115498036
																LOC100222119						KLHL40		LOC115498050
																LOC100222166						KLHL42		LOC115498054
																LOC100222286						KLRG1		LOC115498075
																LOC100222288						KMO		LOC115498198
																LOC100222416						KMT5B		LOC115498220
																LOC100222446						KPNA2		LOC115498235
																LOC100222632						KPNA5		LOC115498266
																LOC100222646						KPNA6		LOC115498278
																LOC100222690						KRT222		LOC115498306
																LOC100222731						KRTCAP3		LOC115498339
																LOC100222908						KSR2		LOC115498346
																LOC100222957						KYAT1		LOC115498347
																LOC100223021						L3MBTL3		LOC115498406
																LOC100223151						LAD1		LOC115498416
																LOC100223259						LAMB3		LOC115498461
																LOC100223347						LANCL1		LOC115498569
																LOC100223408						LARGE1		LOC116806605
																LOC100223567						LARP4		LOC116806610
																LOC100223706						LARP4B		LOC116806619
																LOC100224009						LARS1		LOC116806661
																LOC100224101						LAT2		LOC116806678
																LOC100224281						LCA5L		LOC116806690
																LOC100224332						LDB2		LOC116806691
																LOC100224354						LEMD2		LOC116806699
																LOC100224416						LEO1		LOC116806702
																LOC100224449						LGI3		LOC116806708
																LOC100224585						LGR4		LOC116806720
																LOC100224590						LGR5		LOC116806741
																LOC100224636						LGR6		LOC116806788
																LOC100224645						LHFPL3		LOC116806791
																LOC100224667						LHPP		LOC116806810
																LOC100224677						LHX1		LOC116806837
																LOC100224709						LHX2		LOC116806844
																LOC100224754						LHX3		LOC116806858
																LOC100224784						LHX6		LOC116806873
																LOC100224823						LIFR		LOC116806877
																LOC100224843						LINGO1		LOC116806885
																LOC100224907						LINGO2		LOC116806901
																LOC100224927						LIPT2		LOC116806937
																LOC100225021						LMBR1		LOC116806947
																LOC100225076						LMBR1L		LOC116806973
																LOC100225213						LMF1		LOC116806976
																LOC100225221						LMO1		LOC116807001
																LOC100225322						LMO3		LOC116807004
																LOC100225355						LMTK2		LOC116807006
																LOC100225363						LMX1A		LOC116807013
																LOC100225573						LNPEP		LOC116807016
																LOC100225730						LOC100189937		LOC116807025
																LOC100225817						LOC100190026		LOC116807035
																LOC100225832						LOC100190336		LOC116807066
																LOC100226015						LOC100190503		LOC116807083
																LOC100226208						LOC100217480		LOC116807103
																LOC100226218						LOC100217561		LOC116807118
																LOC100226241						LOC100217615		LOC116807123
																LOC100226286						LOC100217866		LOC116807190
																LOC100226305						LOC100217869		LOC116807254
																LOC100226342						LOC100217969		LOC116807263
																LOC100226418						LOC100218141		LOC116807289
																LOC100226508						LOC100218233		LOC116807402
																LOC100226538						LOC100218321		LOC116807424
																LOC100226559						LOC100218507		LOC116807425
																LOC100226594						LOC100218528		LOC116807437
																LOC100226846						LOC100218541		LOC116807443
																LOC100226900						LOC100218558		LOC116807451
																LOC100226992						LOC100218564		LOC116807473
																LOC100227084						LOC100218573		LOC116807480
																LOC100227087						LOC100218575		LOC116807484
																LOC100227160						LOC100218634		LOC116807501
																LOC100227341						LOC100218721		LOC116807503
																LOC100227551						LOC100218725		LOC116807505
																LOC100227578						LOC100218769		LOC116807524
																LOC100227584						LOC100218816		LOC116807543
																LOC100227654						LOC100218844		LOC116807557
																LOC100227695						LOC100218845		LOC116807612
																LOC100228000						LOC100218887		LOC116807623
																LOC100228060						LOC100218923		LOC116807639
																LOC100228113						LOC100218930		LOC116807676
																LOC100228623						LOC100218931		LOC116807687
																LOC100228653						LOC100219031		LOC116807705
																LOC100228762						LOC100219145		LOC116807706
																LOC100228770						LOC100219158		LOC116807744
																LOC100228819						LOC100219287		LOC116807755
																LOC100228825						LOC100219442		LOC116807761
																LOC100228856						LOC100219447		LOC116807773
																LOC100228858						LOC100219450		LOC116807780
																LOC100228872						LOC100219485		LOC116807791
																LOC100229022						LOC100219497		LOC116807796
																LOC100229133						LOC100219532		LOC116807797
																LOC100229162						LOC100219596		LOC116807803
																LOC100229180						LOC100219720		LOC116807829
																LOC100229272						LOC100219837		LOC116807834
																LOC100229304						LOC100219950		LOC116807841
																LOC100229407						LOC100219971		LOC116807845
																LOC100229443						LOC100220060		LOC116807860
																LOC100229497						LOC100220068		LOC116807863
																LOC100229500						LOC100220107		LOC116807878
																LOC100229546						LOC100220148		LOC116807899
																LOC100229630						LOC100220295		LOC116807904
																LOC100229641						LOC100220375		LOC116807926
																LOC100229646						LOC100220385		LOC116807936
																LOC100229817						LOC100220416		LOC116807939
																LOC100229855						LOC100220634		LOC116807953
																LOC100229864						LOC100220650		LOC116808018
																LOC100229925						LOC100220690		LOC116808073
																LOC100229929						LOC100220712		LOC116808076
																LOC100229949						LOC100220728		LOC116808077
																LOC100229988						LOC100220740		LOC116808082
																LOC100230025						LOC100220752		LOC116808091
																LOC100230026						LOC100220779		LOC116808093
																LOC100230182						LOC100220796		LOC116808101
																LOC100230285						LOC100220813		LOC116808106
																LOC100230290						LOC100220866		LOC116808108
																LOC100230314						LOC100220937		LOC116808154
																LOC100230322						LOC100221041		LOC116808159
																LOC100230481						LOC100221042		LOC116808188
																LOC100230849						LOC100221095		LOC116808197
																LOC100230856						LOC100221146		LOC116808214
																LOC100230859						LOC100221212		LOC116808248
																LOC100231047						LOC100221316		LOC116808253
																LOC100231134						LOC100221480		LOC116808415
																LOC100231164						LOC100221606		LOC116808422
																LOC100231234						LOC100221727		LOC116808425
																LOC100231240						LOC100221733		LOC116808430
																LOC100231293						LOC100221841		LOC116808431
																LOC100231322						LOC100221885		LOC116808445
																LOC100231339						LOC100221889		LOC116808454
																LOC100231355						LOC100221947		LOC116808481
																LOC100231450						LOC100221968		LOC116808493
																LOC100231542						LOC100221996		LOC116808498
																LOC100231557						LOC100221999		LOC116808508
																LOC100231559						LOC100222099		LOC116808528
																LOC100231595						LOC100222137		LOC116808530
																LOC100231666						LOC100222224		LOC116808538
																LOC100231768						LOC100222277		LOC116808552
																LOC100231964						LOC100222299		LOC116808557
																LOC100232116						LOC100222319		LOC116808559
																LOC100232209						LOC100222387		LOC116808565
																LOC100232251						LOC100222441		LOC116808575
																LOC100232495						LOC100222462		LOC116808614
																LOC100232561						LOC100222525		LOC116808617
																LOC100232645						LOC100222565		LOC116808618
																LOC100232659						LOC100222610		LOC116808624
																LOC100232749						LOC100222616		LOC116808629
																LOC101232870						LOC100222639		LOC116808645
																LOC101232953						LOC100222674		LOC116808647
																LOC101232962						LOC100222802		LOC116808653
																LOC101233001						LOC100222897		LOC116808655
																LOC101233052						LOC100223080		LOC116808670
																LOC101233334						LOC100223101		LOC116808671
																LOC101233387						LOC100223114		LOC116808673
																LOC101233554						LOC100223131		LOC116808683
																LOC101233586						LOC100223159		LOC116808686
																LOC101233588						LOC100223160		LOC116808713
																LOC101233669						LOC100223167		LOC116808731
																LOC101233749						LOC100223232		LOC116808777
																LOC101233796						LOC100223250		LOC116808782
																LOC101233935						LOC100223273		LOC116808783
																LOC101233937						LOC100223445		LOC116808845
																LOC101233943						LOC100223643		LOC116808848
																LOC101233957						LOC100223646		LOC116808860
																LOC101233989						LOC100223651		LOC116808868
																LOC101234190						LOC100223670		LOC116808878
																LOC101234248						LOC100223676		LOC116808884
																LOC101234259						LOC100223725		LOC116808885
																LOC105758517						LOC100223745		LOC116808889
																LOC105758548						LOC100223776		LOC116808902
																LOC105758559						LOC100224002		LOC116808903
																LOC105758611						LOC100224071		LOC116808935
																LOC105758623						LOC100224218		LOC116808984
																LOC105758677						LOC100224239		LOC116808997
																LOC105758686						LOC100224263		LOC116809006
																LOC105758692						LOC100224284		LOC116809020
																LOC105758694						LOC100224303		LOC116809048
																LOC105758803						LOC100224313		LOC116809051
																LOC105758805						LOC100224543		LOC116809060
																LOC105758852						LOC100224554		LOC116809068
																LOC105758859						LOC100224644		LOC116809091
																LOC105758871						LOC100224661		LOC116809107
																LOC105758954						LOC100224698		LOC116809111
																LOC105758978						LOC100224757		LOC116809119
																LOC105759010						LOC100224950		LOC116809150
																LOC105759025						LOC100225145		LOC116809154
																LOC105759083						LOC100225216		LOC116809186
																LOC105759121						LOC100225286		LOC116809191
																LOC105759124						LOC100225287		LOC116809193
																LOC105759140						LOC100225375		LOC116809198
																LOC105759143						LOC100225453		LOC116809206
																LOC105759204						LOC100225532		LOC116809211
																LOC105759233						LOC100225533		LOC116809221
																LOC105759267						LOC100225594		LOC116809231
																LOC105759318						LOC100225628		LOC116809232
																LOC105759327						LOC100225635		LOC116809234
																LOC105759334						LOC100225641		LOC116809245
																LOC105759349						LOC100225866		LOC116809276
																LOC105759353						LOC100225871		LOC116809287
																LOC105759381						LOC100225878		LOC116809289
																LOC105759498						LOC100225898		LOC116809293
																LOC105759518						LOC100225946		LOC116809304
																LOC105759774						LOC100225999		LOC116809310
																LOC105759829						LOC100226034		LOC116809316
																LOC105759916						LOC100226062		LOC116809318
																LOC105760106						LOC100226156		LOC751972
																LOC105760489						LOC100226207		LONP2
																LOC105760494						LOC100226230		LONRF1
																LOC105760508						LOC100226244		LOX
																LOC105760702						LOC100226250		LPAR6
																LOC105760756						LOC100226446		LRCH3
																LOC105760824						LOC100226496		LRRC8A
																LOC105760826						LOC100226503		LRRTM3
																LOC105760829						LOC100226530		LSG1
																LOC105760834						LOC100226555		LSM14B
																LOC105760863						LOC100226600		LTN1
																LOC105760871						LOC100226641		LXN
																LOC105760877						LOC100226727		LY86
																LOC105760884						LOC100226754		LYPLA2
																LOC105760885						LOC100226896		LYRM1
																LOC105760973						LOC100226913		MAB21L4
																LOC105760998						LOC100227038		MAD2L2
																LOC115490569						LOC100227127		MAFK
																LOC115490572						LOC100227175		MAN1A2
																LOC115490584						LOC100227271		MAN2C1
																LOC115490589						LOC100227296		MAPRE1
																LOC115490620						LOC100227297		MARCHF11
																LOC115490655						LOC100227298		MARCHF2
																LOC115490686						LOC100227351		MARCHF6
																LOC115490688						LOC100227468		MARK1
																LOC115490693						LOC100227500		MBNL2
																LOC115490694						LOC100227533		MBTD1
																LOC115490696						LOC100227541		ME1
																LOC115490697						LOC100227542		ME2
																LOC115490725						LOC100227609		MED14
																LOC115490727						LOC100227652		MED22
																LOC115490728						LOC100227698		MED24
																LOC115490733						LOC100227781		MED31
																LOC115490758						LOC100227800		MEF2C
																LOC115490759						LOC100227862		MEF2D
																LOC115490777						LOC100227863		MEMO1
																LOC115490831						LOC100227875		MEST
																LOC115490864						LOC100228012		METAP1
																LOC115490875						LOC100228027		METRN
																LOC115490889						LOC100228079		METTL22
																LOC115490901						LOC100228103		METTL8
																LOC115490934						LOC100228106		MEX3A
																LOC115490943						LOC100228204		MFN1
																LOC115490944						LOC100228270		MFSD2A
																LOC115490945						LOC100228379		MGAT3
																LOC115490948						LOC100228485		MGAT5
																LOC115490951						LOC100228608		MICALL2
																LOC115490956						LOC100228612		MICOS13
																LOC115490958						LOC100228705		MIER1
																LOC115490963						LOC100228717		MIR103-2
																LOC115490965						LOC100228737		MIR142
																LOC115490966						LOC100228855		MIR146A
																LOC115490968						LOC100228927		MIR1744
																LOC115490970						LOC100229126		MIR192
																LOC115490972						LOC100229197		MIR23
																LOC115490977						LOC100229266		MIR2959
																LOC115490978						LOC100229295		MIR2975
																LOC115490981						LOC100229315		MIR2984
																LOC115490984						LOC100229366		MIR338
																LOC115490988						LOC100229371		MKNK2
																LOC115490990						LOC100229524		MLF1
																LOC115490991						LOC100229618		MLST8
																LOC115490998						LOC100229624		MMADHC
																LOC115491011						LOC100229692		MMEL1
																LOC115491012						LOC100229734		MMP9
																LOC115491015						LOC100229778		MNAT1
																LOC115491016						LOC100229789		MOGAT2
																LOC115491018						LOC100229886		MORN3
																LOC115491023						LOC100230104		MOSPD1
																LOC115491028						LOC100230156		MPC1
																LOC115491036						LOC100230168		MPHOSPH9
																LOC115491039						LOC100230178		MPST
																LOC115491040						LOC100230192		MPV17
																LOC115491049						LOC100230328		MRAP
																LOC115491056						LOC100230413		MRPL1
																LOC115491060						LOC100230461		MRPL23
																LOC115491061						LOC100230474		MRPL58
																LOC115491063						LOC100230549		MRPS22
																LOC115491068						LOC100230575		MRPS31
																LOC115491069						LOC100230638		MRPS34
																LOC115491082						LOC100230724		MSANTD1
																LOC115491094						LOC100230811		MSANTD2
																LOC115491097						LOC100230866		MSTN
																LOC115491106						LOC100230890		MTF1
																LOC115491110						LOC100230949		MTFMT
																LOC115491111						LOC100230978		MTG1
																LOC115491113						LOC100231116		MTMR1
																LOC115491115						LOC100231213		MTMR10
																LOC115491119						LOC100231233		MTRES1
																LOC115491122						LOC100231369		MTREX
																LOC115491123						LOC100231488		MTSS1
																LOC115491124						LOC100231508		MTUS1
																LOC115491126						LOC100231510		MUL1
																LOC115491128						LOC100231660		MYBBP1A
																LOC115491129						LOC100231733		MYCBP
																LOC115491134						LOC100231840		MYCBPAP
																LOC115491138						LOC100232028		MYCN
																LOC115491141						LOC100232037		MYD88
																LOC115491142						LOC100232098		MYDGF
																LOC115491145						LOC100232125		MYO1H
																LOC115491151						LOC100232212		MYOD1
																LOC115491154						LOC100232233		MYPN
																LOC115491161						LOC100232280		NAA30
																LOC115491169						LOC100232309		NABP1
																LOC115491170						LOC100232332		NAP1L4
																LOC115491171						LOC100232344		NCAPD2
																LOC115491173						LOC100232372		NCKAP1
																LOC115491181						LOC100232385		NCLN
																LOC115491186						LOC100232386		NDC1
																LOC115491192						LOC100232391		NDRG4
																LOC115491194						LOC100232392		NDST1
																LOC115491202						LOC100232465		NDST4
																LOC115491204						LOC100232500		NDUFA1
																LOC115491206						LOC100232607		NDUFB10
																LOC115491207						LOC101232826		NDUFB3
																LOC115491213						LOC101232842		NDUFS7
																LOC115491214						LOC101232977		NEK2
																LOC115491217						LOC101232986		NEK3
																LOC115491218						LOC101233355		NELFCD
																LOC115491219						LOC101233398		NETO2
																LOC115491220						LOC101233471		NEUROG2
																LOC115491225						LOC101233500		NEXN
																LOC115491231						LOC101233507		NFASC
																LOC115491233						LOC101233531		NFIA
																LOC115491241						LOC101233664		NFKB1
																LOC115491256						LOC101233680		NFRKB
																LOC115491258						LOC101233767		NFS1
																LOC115491259						LOC101233771		NFYA
																LOC115491264						LOC101233878		NFYB
																LOC115491266						LOC101233889		NGEF
																LOC115491267						LOC101233949		NHLH1
																LOC115491269						LOC101234008		NIBAN1
																LOC115491272						LOC101234062		NIN
																LOC115491277						LOC101234089		NINJ1
																LOC115491278						LOC101234123		NIPAL3
																LOC115491281						LOC101234147		NKAP
																LOC115491282						LOC101234163		NKAPD1
																LOC115491283						LOC101234170		NKTR
																LOC115491290						LOC101234234		NLK
																LOC115491291						LOC105758485		NMB
																LOC115491354						LOC105758513		NMD3
																LOC115491367						LOC105758573		NME8
																LOC115491379						LOC105758587		NOC4L
																LOC115491505						LOC105758607		NOX5
																LOC115491512						LOC105758667		NOXO1
																LOC115491516						LOC105758668		NPHP1
																LOC115491518						LOC105758679		NPM3
																LOC115491524						LOC105758698		NPSR1
																LOC115491595						LOC105758723		NRG4
																LOC115491599						LOC105758783		NSMCE1
																LOC115491655						LOC105758791		NSMCE4A
																LOC115491676						LOC105758806		NT5C1A
																LOC115491692						LOC105758844		NT5M
																LOC115491724						LOC105758847		NTMT1
																LOC115491851						LOC105758848		NUBP1
																LOC115491858						LOC105758876		NUBP2
																LOC115491887						LOC105758909		NUDC
																LOC115491955						LOC105758935		NUF2
																LOC115491957						LOC105758977		NUP107
																LOC115491977						LOC105759048		NUP88
																LOC115492038						LOC105759051		NUSAP1
																LOC115492049						LOC105759064		NVL
																LOC115492054						LOC105759105		NXPH3
																LOC115492105						LOC105759110		OCIAD1
																LOC115492192						LOC105759122		OCRL
																LOC115492257						LOC105759123		ODF2
																LOC115492259						LOC105759161		OFCC1
																LOC115492297						LOC105759181		OMD
																LOC115492307						LOC105759186		OPRL1
																LOC115492313						LOC105759190		ORAI2
																LOC115492332						LOC105759314		ORMDL3
																LOC115492335						LOC105759399		OSBPL10
																LOC115492346						LOC105759411		OSBPL2
																LOC115492361						LOC105759491		OSCP1
																LOC115492374						LOC105759661		OSTF1
																LOC115492377						LOC105759741		P3H2
																LOC115492389						LOC105759932		PAAF1
																LOC115492472						LOC105760022		PABPC1
																LOC115492473						LOC105760185		PACSIN1
																LOC115492478						LOC105760369		PACSIN2
																LOC115492479						LOC105760451		PAFAH1B1
																LOC115492496						LOC105760493		PALB2
																LOC115492499						LOC105760502		PALM2AKAP2
																LOC115492525						LOC105760670		PAN2
																LOC115492537						LOC105760690		PANK4
																LOC115492551						LOC105760701		PAPPA2
																LOC115492552						LOC105760808		PARP16
																LOC115492620						LOC105760850		PASD1
																LOC115492673						LOC105760853		PCBD2
																LOC115492722						LOC105760990		PCDH20
																LOC115492816						LOC105760992		PCDH9
																LOC115492886						LOC105760993		PCGF2
																LOC115492889						LOC105760995		PCMT1
																LOC115492923						LOC115490588		PCOLCE2
																LOC115492991						LOC115490602		PCSK4
																LOC115492993						LOC115490628		PCTP
																LOC115493062						LOC115490629		PCYOX1
																LOC115493072						LOC115490662		PCYT1B
																LOC115493074						LOC115490670		PDCD1LG2
																LOC115493094						LOC115490677		PDCD4
																LOC115493128						LOC115490700		PDCL2
																LOC115493134						LOC115490710		PDE4A
																LOC115493170						LOC115490720		PDE4DIP
																LOC115493185						LOC115490726		PDHB
																LOC115493246						LOC115490732		PDIA2
																LOC115493337						LOC115490739		PDP2
																LOC115493347						LOC115490757		PDPK1
																LOC115493348						LOC115490760		PDPN
																LOC115493349						LOC115490770		PDRG1
																LOC115493353						LOC115490771		PDXDC1
																LOC115493357						LOC115490793		PEBP1
																LOC115493363						LOC115490815		PECAM1
																LOC115493365						LOC115490816		PERM1
																LOC115493380						LOC115490841		PFDN1
																LOC115493386						LOC115490869		PFDN2
																LOC115493413						LOC115490872		PFN2
																LOC115493417						LOC115490928		PGS1
																LOC115493435						LOC115490935		PHB2
																LOC115493446						LOC115490946		PHETA1
																LOC115493448						LOC115490949		PHF21B
																LOC115493455						LOC115490957		PHF5A
																LOC115493457						LOC115490971		PHLDB2
																LOC115493460						LOC115490985		PHTF1
																LOC115493472						LOC115490989		PIAS2
																LOC115493474						LOC115490992		PID1
																LOC115493486						LOC115491007		PIGG
																LOC115493487						LOC115491019		PIGU
																LOC115493495						LOC115491025		PIK3R2
																LOC115493496						LOC115491032		PIM3
																LOC115493517						LOC115491038		PIMREG
																LOC115493521						LOC115491044		PIP4K2B
																LOC115493522						LOC115491045		PIP5K1C
																LOC115493538						LOC115491047		PITPNB
																LOC115493553						LOC115491055		PJVK
																LOC115493560						LOC115491065		PKDREJ
																LOC115493570						LOC115491066		PLA2G10
																LOC115493606						LOC115491070		PLCG1
																LOC115493613						LOC115491071		PLCZ1
																LOC115493614						LOC115491072		PLEKHA5
																LOC115493619						LOC115491073		PLEKHB2
																LOC115493627						LOC115491078		PLK4
																LOC115493630						LOC115491080		PLK5
																LOC115493633						LOC115491084		PLOD1
																LOC115493637						LOC115491085		PLS3
																LOC115493654						LOC115491088		PLXND1
																LOC115493664						LOC115491090		PM20D1
																LOC115493666						LOC115491101		PNISR
																LOC115493678						LOC115491112		PNO1
																LOC115493686						LOC115491120		PNPLA2
																LOC115493692						LOC115491130		POC5
																LOC115493696						LOC115491135		POGLUT3
																LOC115493721						LOC115491136		POLD3
																LOC115493733						LOC115491137		POLE2
																LOC115493734						LOC115491140		POLK
																LOC115493735						LOC115491143		POLR1E
																LOC115493747						LOC115491144		POLR2D
																LOC115493751						LOC115491150		POU1F1
																LOC115493766						LOC115491152		POU3F1
																LOC115493775						LOC115491153		PPFIA4
																LOC115493778						LOC115491162		PPFIBP1
																LOC115493780						LOC115491167		PPM1A
																LOC115493785						LOC115491168		PPM1L
																LOC115493823						LOC115491177		PPME1
																LOC115493833						LOC115491180		PPP1R14C
																LOC115493835						LOC115491185		PPP1R7
																LOC115493839						LOC115491188		PPP1R9B
																LOC115493849						LOC115491205		PPP4R1
																LOC115493850						LOC115491226		PPT1
																LOC115493853						LOC115491228		PRDM15
																LOC115493860						LOC115491229		PRDX6
																LOC115493873						LOC115491237		PRIMPOL
																LOC115493888						LOC115491242		PRKAR1B
																LOC115493896						LOC115491249		PRKAR2A
																LOC115493920						LOC115491262		PRKAR2B
																LOC115493964						LOC115491263		PRKCD
																LOC115493969						LOC115491268		PRKCE
																LOC115493972						LOC115491275		PRMT9
																LOC115493977						LOC115491279		PROS1
																LOC115493979						LOC115491289		PRPS1
																LOC115493981						LOC115491297		PRRG4
																LOC115493982						LOC115491300		PRRT1B
																LOC115494006						LOC115491305		PRSS55
																LOC115494020						LOC115491410		PSMA5
																LOC115494079						LOC115491417		PSMA6
																LOC115494082						LOC115491482		PSMA7
																LOC115494085						LOC115491548		PSMB7
																LOC115494100						LOC115491594		PSMC1
																LOC115494105						LOC115491597		PSMC2
																LOC115494108						LOC115491631		PSMC5
																LOC115494110						LOC115491674		PSMD6
																LOC115494116						LOC115491712		PSMD9
																LOC115494119						LOC115491734		PSME3
																LOC115494122						LOC115491783		PSME3IP1
																LOC115494123						LOC115491814		PSME4
																LOC115494145						LOC115491835		PSMG3
																LOC115494256						LOC115491911		PSTK
																LOC115494258						LOC115491912		PTBP1
																LOC115494267						LOC115491914		PTCD3
																LOC115494289						LOC115491932		PTEN
																LOC115494292						LOC115491935		PTGER2
																LOC115494301						LOC115492013		PTGFRN
																LOC115494322						LOC115492023		PTGS2
																LOC115494323						LOC115492053		PTK7
																LOC115494333						LOC115492139		PTPA
																LOC115494343						LOC115492169		PTPN1
																LOC115494348						LOC115492191		PTPN11
																LOC115494360						LOC115492201		PTPN2
																LOC115494363						LOC115492204		PUS7
																LOC115494364						LOC115492207		PUSL1
																LOC115494377						LOC115492303		PXK
																LOC115494384						LOC115492314		PYCR1
																LOC115494396						LOC115492321		PYGO1
																LOC115494403						LOC115492348		QPRT
																LOC115494430						LOC115492365		RAB14
																LOC115494433						LOC115492366		RAB23
																LOC115494453						LOC115492371		RAB29
																LOC115494462						LOC115492379		RAB31
																LOC115494467						LOC115492386		RAB3IP
																LOC115494472						LOC115492402		RAB5A
																LOC115494501						LOC115492411		RABGGTB
																LOC115494502						LOC115492412		RAD17
																LOC115494505						LOC115492438		RAD18
																LOC115494513						LOC115492461		RAD50
																LOC115494519						LOC115492465		RAD51AP1
																LOC115494524						LOC115492476		RAD52
																LOC115494538						LOC115492484		RAD9B
																LOC115494541						LOC115492497		RAF1
																LOC115494549						LOC115492502		RAI1
																LOC115494557						LOC115492505		RALGAPA2
																LOC115494575						LOC115492508		RALGPS2
																LOC115494614						LOC115492511		RAMP1
																LOC115494620						LOC115492533		RANBP1
																LOC115494623						LOC115492534		RANBP3
																LOC115494634						LOC115492545		RANGAP1
																LOC115494637						LOC115492547		RAP1GAP2
																LOC115494644						LOC115492562		RAPGEF3
																LOC115494662						LOC115492576		RAPH1
																LOC115494688						LOC115492597		RAPSN
																LOC115494691						LOC115492608		RARRES1
																LOC115494696						LOC115492635		RASGRF2
																LOC115494723						LOC115492672		RAX
																LOC115494724						LOC115492698		RBBP7
																LOC115494725						LOC115492902		RBFOX1
																LOC115494726						LOC115492997		RBFOX2
																LOC115494745						LOC115493081		RBFOX3
																LOC115494756						LOC115493088		RBM19
																LOC115494797						LOC115493090		RBM38
																LOC115494807						LOC115493100		RBM45
																LOC115494823						LOC115493101		RBM8A
																LOC115494824						LOC115493106		RBX1
																LOC115494828						LOC115493109		RC3H1
																LOC115494830						LOC115493111		RCC1
																LOC115494850						LOC115493149		REXO2
																LOC115494867						LOC115493254		RFC1
																LOC115494876						LOC115493286		RFFL
																LOC115494893						LOC115493325		RFNG
																LOC115494904						LOC115493333		RGS22
																LOC115494907						LOC115493338		RGS5
																LOC115494921						LOC115493340		RHBDD2
																LOC115494927						LOC115493341		RHOA
																LOC115494933						LOC115493355		RHOBTB3
																LOC115494937						LOC115493356		RILP
																LOC115494951						LOC115493358		RILPL2
																LOC115494956						LOC115493362		RIMS4
																LOC115494957						LOC115493364		RIPK1
																LOC115494966						LOC115493366		RNF11
																LOC115494978						LOC115493375		RNF115
																LOC115494990						LOC115493390		RNF121
																LOC115494991						LOC115493395		RNF123
																LOC115494995						LOC115493396		RNF138
																LOC115495000						LOC115493401		RNF14
																LOC115495008						LOC115493410		RNF144B
																LOC115495018						LOC115493411		RNF169
																LOC115495025						LOC115493412		RNF34
																LOC115495040						LOC115493414		RNPEPL1
																LOC115495044						LOC115493419		ROBO1
																LOC115495048						LOC115493424		RPL3L
																LOC115495065						LOC115493428		RPN1
																LOC115495070						LOC115493439		RPP30
																LOC115495083						LOC115493440		RPS27L
																LOC115495086						LOC115493451		RRH
																LOC115495098						LOC115493461		RRP9
																LOC115495113						LOC115493464		RSF1
																LOC115495115						LOC115493467		RSPH1
																LOC115495119						LOC115493469		RUBCNL
																LOC115495130						LOC115493471		RYK
																LOC115495134						LOC115493489		S100A14
																LOC115495141						LOC115493493		SALL3
																LOC115495144						LOC115493510		SAMD12
																LOC115495145						LOC115493514		SAP30BP
																LOC115495191						LOC115493529		SARAF
																LOC115495196						LOC115493532		SASS6
																LOC115495198						LOC115493543		SAXO2
																LOC115495201						LOC115493545		SBNO2
																LOC115495204						LOC115493546		SCAI
																LOC115495208						LOC115493552		SCARB1
																LOC115495211						LOC115493568		SCLY
																LOC115495225						LOC115493588		SCOC
																LOC115495226						LOC115493601		SCPEP1
																LOC115495233						LOC115493609		SCRT2
																LOC115495240						LOC115493611		SCYL3
																LOC115495244						LOC115493612		SDCBP2
																LOC115495253						LOC115493631		SDHA
																LOC115495264						LOC115493632		SDK1
																LOC115495284						LOC115493636		SEC13
																LOC115495291						LOC115493638		SEC22A
																LOC115495304						LOC115493644		SEC24A
																LOC115495305						LOC115493651		SEC61B
																LOC115495336						LOC115493656		SELENON
																LOC115495351						LOC115493674		SEMA7A
																LOC115495367						LOC115493675		SENP2
																LOC115495368						LOC115493685		SENP6
																LOC115495371						LOC115493699		SEPTIN11
																LOC115495377						LOC115493727		SERINC3
																LOC115495380						LOC115493737		SERP1
																LOC115495383						LOC115493738		SERPINE3
																LOC115495413						LOC115493740		SETD6
																LOC115495429						LOC115493756		SEZ6L
																LOC115495464						LOC115493758		SFXN2
																LOC115495467						LOC115493759		SGIP1
																LOC115495468						LOC115493762		SH2D1B
																LOC115495474						LOC115493789		SH3BGR
																LOC115495475						LOC115493799		SH3BP4
																LOC115495481						LOC115493803		SH3GL1
																LOC115495482						LOC115493804		SH3PXD2A
																LOC115495484						LOC115493818		SHH
																LOC115495485						LOC115493824		SHOX2
																LOC115495510						LOC115493832		SHPK
																LOC115495515						LOC115493836		SIAE
																LOC115495526						LOC115493843		SIK1
																LOC115495535						LOC115493844		SIPA1L1
																LOC115495542						LOC115493846		SKA1
																LOC115495547						LOC115493859		SKIDA1
																LOC115495568						LOC115493864		SLA
																LOC115495586						LOC115493865		SLC12A5
																LOC115495602						LOC115493867		SLC13A4
																LOC115495606						LOC115493879		SLC15A4
																LOC115495608						LOC115493881		SLC20A2
																LOC115495625						LOC115493899		SLC22A7
																LOC115495632						LOC115493904		SLC24A1
																LOC115495646						LOC115493906		SLC25A10
																LOC115495652						LOC115493908		SLC25A14
																LOC115495661						LOC115493910		SLC25A25
																LOC115495679						LOC115493921		SLC25A42
																LOC115495688						LOC115493931		SLC25A43
																LOC115495706						LOC115493933		SLC25A46
																LOC115495710						LOC115493941		SLC25A48
																LOC115495738						LOC115493942		SLC2A1
																LOC115495765						LOC115493945		SLC2A10
																LOC115495773						LOC115493947		SLC2A11
																LOC115495775						LOC115493953		SLC2A2
																LOC115495796						LOC115493954		SLC30A2
																LOC115495826						LOC115493975		SLC32A1
																LOC115495833						LOC115493987		SLC35A3
																LOC115495836						LOC115493992		SLC35A5
																LOC115495858						LOC115494001		SLC35C2
																LOC115495880						LOC115494002		SLC35G2
																LOC115495889						LOC115494004		SLC38A11
																LOC115495898						LOC115494009		SLC39A14
																LOC115495906						LOC115494011		SLC44A5
																LOC115495912						LOC115494032		SLC4A4
																LOC115495921						LOC115494039		SLC5A5
																LOC115495929						LOC115494041		SLC5A9
																LOC115495934						LOC115494042		SLC6A6
																LOC115495943						LOC115494046		SLC6A8
																LOC115495947						LOC115494048		SLC7A14
																LOC115495950						LOC115494090		SLC9A6
																LOC115495962						LOC115494093		SLTM
																LOC115495965						LOC115494097		SLU7
																LOC115495969						LOC115494106		SLX4
																LOC115495971						LOC115494112		SMAP2
																LOC115495975						LOC115494113		SMARCA5
																LOC115495980						LOC115494115		SMARCD1
																LOC115495993						LOC115494120		SMARCD2
																LOC115496008						LOC115494134		SMARCD3
																LOC115496012						LOC115494138		SMC1A
																LOC115496018						LOC115494142		SMCO4
																LOC115496024						LOC115494245		SMDT1
																LOC115496049						LOC115494250		SMG6
																LOC115496057						LOC115494266		SMG8
																LOC115496065						LOC115494269		SMIM32
																LOC115496067						LOC115494272		SMIM5
																LOC115496083						LOC115494277		SMTNL2
																LOC115496090						LOC115494278		SNRPB2
																LOC115496095						LOC115494279		SNX6
																LOC115496120						LOC115494283		SNX8
																LOC115496121						LOC115494291		SOX9
																LOC115496126						LOC115494297		SPA17
																LOC115496135						LOC115494303		SPACA9
																LOC115496139						LOC115494315		SPAG16
																LOC115496143						LOC115494321		SPAG6
																LOC115496148						LOC115494332		SPATA18
																LOC115496161						LOC115494337		SPATA2
																LOC115496171						LOC115494346		SPATA20
																LOC115496184						LOC115494347		SPATA6
																LOC115496187						LOC115494349		SPCS2
																LOC115496188						LOC115494356		SPECC1
																LOC115496199						LOC115494367		SPEF1
																LOC115496235						LOC115494376		SPG7
																LOC115496237						LOC115494378		SPINK2
																LOC115496243						LOC115494386		SPIRE1
																LOC115496256						LOC115494395		SPPL3
																LOC115496257						LOC115494397		SPR
																LOC115496260						LOC115494398		SPTSSA
																LOC115496285						LOC115494402		SPTY2D1
																LOC115496324						LOC115494414		SQOR
																LOC115496325						LOC115494415		SQSTM1
																LOC115496332						LOC115494427		SRD5A1
																LOC115496335						LOC115494431		SRGAP1
																LOC115496369						LOC115494432		SRP72
																LOC115496372						LOC115494440		SRPK1
																LOC115496381						LOC115494447		SRPRB
																LOC115496385						LOC115494455		SRRM1
																LOC115496397						LOC115494459		SRSF1
																LOC115496403						LOC115494475		SRXN1
																LOC115496411						LOC115494477		SSB
																LOC115496420						LOC115494483		ST6GALNAC4
																LOC115496432						LOC115494498		ST7L
																LOC115496435						LOC115494515		ST8SIA1
																LOC115496441						LOC115494516		STAG1
																LOC115496442						LOC115494518		STAG2
																LOC115496444						LOC115494523		STAT3
																LOC115496449						LOC115494530		STAU1
																LOC115496453						LOC115494531		STK40
																LOC115496463						LOC115494540		STOX1
																LOC115496467						LOC115494543		STX12
																LOC115496474						LOC115494547		STX6
																LOC115496475						LOC115494555		STX7
																LOC115496552						LOC115494556		SUCLG1
																LOC115496567						LOC115494560		SUCLG2
																LOC115496571						LOC115494566		SUCO
																LOC115496580						LOC115494567		SUGT1
																LOC115496588						LOC115494572		SULF2
																LOC115496626						LOC115494606		SYNRG
																LOC115496628						LOC115494618		SYS1
																LOC115496635						LOC115494625		SYT4
																LOC115496660						LOC115494628		TADA1
																LOC115496662						LOC115494630		TAF12
																LOC115496663						LOC115494643		TAF1D
																LOC115496665						LOC115494646		TAFA3
																LOC115496698						LOC115494692		TAFA4
																LOC115496706						LOC115494698		TAPT1
																LOC115496713						LOC115494699		TBC1D22B
																LOC115496723						LOC115494705		TBC1D8B
																LOC115496728						LOC115494714		TBCEL
																LOC115496773						LOC115494716		TBPL2
																LOC115496797						LOC115494722		TBX1
																LOC115496800						LOC115494727		TCEA2
																LOC115496801						LOC115494734		TCEA3
																LOC115496812						LOC115494752		TCTE3
																LOC115496833						LOC115494755		TDRD3
																LOC115496842						LOC115494759		TEC
																LOC115496844						LOC115494803		TECPR1
																LOC115496853						LOC115494816		TECRL
																LOC115496861						LOC115494817		TEKT1
																LOC115496868						LOC115494825		TEKT2
																LOC115496878						LOC115494860		TEKT3
																LOC115496880						LOC115494865		TENT5A
																LOC115496887						LOC115494871		TENT5D
																LOC115496912						LOC115494885		TESK2
																LOC115496927						LOC115494888		TEX10
																LOC115496955						LOC115494914		TEX14
																LOC115496973						LOC115494925		TEX261
																LOC115496974						LOC115494926		TFAP2C
																LOC115496977						LOC115494929		TFG
																LOC115496980						LOC115494952		TFPI
																LOC115496993						LOC115494955		TGOLN2
																LOC115497005						LOC115494969		THAP1
																LOC115497007						LOC115494986		THEGL
																LOC115497011						LOC115494998		THEMIS
																LOC115497021						LOC115495023		THNSL1
																LOC115497025						LOC115495036		THOC7
																LOC115497028						LOC115495041		THSD4
																LOC115497031						LOC115495049		TIMM13
																LOC115497032						LOC115495055		TIMM17A
																LOC115497036						LOC115495062		TIMM22
																LOC115497038						LOC115495063		TIMM44
																LOC115497041						LOC115495072		TIPIN
																LOC115497043						LOC115495073		TLCD3B
																LOC115497056						LOC115495079		TLE3
																LOC115497064						LOC115495084		TLR3
																LOC115497077						LOC115495092		TLR5
																LOC115497079						LOC115495104		TMCO1
																LOC115497083						LOC115495125		TMEM104
																LOC115497094						LOC115495126		TMEM130
																LOC115497095						LOC115495127		TMEM138
																LOC115497097						LOC115495135		TMEM169
																LOC115497102						LOC115495137		TMEM17
																LOC115497110						LOC115495139		TMEM231
																LOC115497116						LOC115495146		TMEM233
																LOC115497130						LOC115495184		TMEM248
																LOC115497135						LOC115495190		TMEM43
																LOC115497161						LOC115495195		TMEM45A
																LOC115497174						LOC115495197		TMEM50A
																LOC115497176						LOC115495200		TMEM63A
																LOC115497184						LOC115495203		TMIE
																LOC115497203						LOC115495215		TMLHE
																LOC115497204						LOC115495216		TMTC1
																LOC115497209						LOC115495217		TNFRSF4
																LOC115497218						LOC115495221		TNIK
																LOC115497219						LOC115495223		TNIP1
																LOC115497224						LOC115495228		TNKS
																LOC115497228						LOC115495230		TNKS2
																LOC115497235						LOC115495234		TNNI1
																LOC115497243						LOC115495258		TNR
																LOC115497249						LOC115495261		TOM1L1
																LOC115497251						LOC115495270		TOP1
																LOC115497263						LOC115495272		TOR1B
																LOC115497268						LOC115495273		TP53BP2
																LOC115497270						LOC115495274		TPD52L2
																LOC115497272						LOC115495277		TPI1
																LOC115497274						LOC115495297		TPMT
																LOC115497291						LOC115495299		TPPP
																LOC115497292						LOC115495318		TRAF1
																LOC115497294						LOC115495332		TRAF3IP1
																LOC115497306						LOC115495341		TRAF3IP2
																LOC115497309						LOC115495363		TRAFD1
																LOC115497320						LOC115495372		TRAPPC3
																LOC115497330						LOC115495376		TRAPPC4
																LOC115497336						LOC115495389		TRAPPC6B
																LOC115497338						LOC115495393		TRERF1
																LOC115497341						LOC115495423		TRIM59
																LOC115497358						LOC115495452		TRIOBP
																LOC115497379						LOC115495488		TRMT6
																LOC115497391						LOC115495492		TRNAA-AGC_2
																LOC115497392						LOC115495497		TRNAC-GCA_4
																LOC115497407						LOC115495521		TRNAC-GCA_8
																LOC115497411						LOC115495528		TRNAE-CUC
																LOC115497414						LOC115495541		TRNAG-UCC
																LOC115497431						LOC115495545		TRNAH-GUG
																LOC115497450						LOC115495564		TRNAR-UCU_1
																LOC115497457						LOC115495572		TRNAS-GCU
																LOC115497552						LOC115495574		TRNAS-GCU_2
																LOC115497553						LOC115495584		TRNAY-GUA_2
																LOC115497564						LOC115495589		TRNAY-GUA_4
																LOC115497585						LOC115495596		TRNP1
																LOC115497592						LOC115495600		TRPM7
																LOC115497593						LOC115495617		TRPS1
																LOC115497612						LOC115495628		TSGA10
																LOC115497641						LOC115495640		TSPAN9
																LOC115497644						LOC115495653		TSR3
																LOC115497649						LOC115495654		TTC19
																LOC115497663						LOC115495655		TTC25
																LOC115497666						LOC115495657		TTC39B
																LOC115497671						LOC115495671		TTK
																LOC115497677						LOC115495673		TTL
																LOC115497683						LOC115495680		TTLL4
																LOC115497684						LOC115495694		TUBAL3
																LOC115497695						LOC115495695		TUSC2
																LOC115497712						LOC115495696		TVP23A
																LOC115497726						LOC115495698		TXNDC12
																LOC115497741						LOC115495708		TXNRD3
																LOC115497743						LOC115495712		TYW3
																LOC115497745						LOC115495716		UBA3
																LOC115497755						LOC115495717		UBA6
																LOC115497758						LOC115495720		UBB
																LOC115497764						LOC115495731		UBC
																LOC115497770						LOC115495747		UBE2F
																LOC115497772						LOC115495755		UBE2K
																LOC115497773						LOC115495760		UBE2L3
																LOC115497782						LOC115495781		UBE2Q1
																LOC115497790						LOC115495786		UBE2Q2
																LOC115497794						LOC115495788		UBE2QL1
																LOC115497803						LOC115495789		UBE2V1
																LOC115497804						LOC115495790		UBE4B
																LOC115497838						LOC115495797		UBN2
																LOC115497846						LOC115495808		UBR7
																LOC115497877						LOC115495809		UBXN4
																LOC115497884						LOC115495821		UBXN6
																LOC115497891						LOC115495827		UCK1
																LOC115497892						LOC115495830		UCKL1
																LOC115497893						LOC115495839		UFL1
																LOC115497897						LOC115495847		UGDH
																LOC115497900						LOC115495854		UHRF1
																LOC115497913						LOC115495856		UHRF1BP1
																LOC115497914						LOC115495864		ULK4
																LOC115497919						LOC115495870		UPF1
																LOC115497943						LOC115495881		UPF3B
																LOC115497994						LOC115495886		UPP2
																LOC115498011						LOC115495897		USP10
																LOC115498030						LOC115495901		USP16
																LOC115498047						LOC115495914		USP18
																LOC115498048						LOC115495916		USP22
																LOC115498055						LOC115495920		USP28
																LOC115498095						LOC115495924		USP3
																LOC115498109						LOC115495926		USP4
																LOC115498111						LOC115495928		USP48
																LOC115498114						LOC115495938		USP53
																LOC115498124						LOC115495958		USP7
																LOC115498164						LOC115495960		VANGL2
																LOC115498193						LOC115495978		VAPB
[truncated: 2,083 more rows]
[truncated: 16 more columns]

## Sheet: c_HUB_Genes
TES Saddlebrown	TES Paleturquoise	TES Orangered3	TES Cyan	TES Lightgreen
ABCC2	ACRBP	APOLD1	ADARB2	ABCC9
ADRB1	AGPS	ATF3	ANLN	ANKRD26
ANXA11	AIMP2	CCN1	AOAH	AVPR1A
AP3M1	BLMH	CCN2	ATXN1	BICD1
ATRNL1	CDKAL1	DUSP1	CPNE4	C1AH12orf73
BMS1	COPS5	EGR4	DGKB	CBLL1
CALHM2	GPS1	NR4A1	EEF1E1	CFAP54
DLG5	IER5L	OTUD1	EPB41L4B	CHPT1
LOC100190507	IFT140		GMNN	CRADD
LOC100218935	LOC115496371		KAT2B	CREB3L2
LOC100231740	MAB21L3		KCNH8	CTTNBP2
LOC100232471	MTX3		KRIT1	ERGIC2
LOC100232794	NDUFS4		LOC100190710	GALR3
LOC115495752	PDCD6		LOC100220976	IL26
LOC116808555	PPRC1		LOC100229701	IQUB
LRIT2	TCAIM		LOC100230122	KRAS
OGDHL	TSPAN13		LOC101234087	LOC100217677
OPN4	WDR82		LOC105758980	LOC105758588
PAPSS2			LOC115493673	LOC105760490
PPIF			LOC115493710	LOC115490906
RPS24			LOC115493770	LOC115490931
SFR1			LOC115493772	LOC115493361
SORBS1			LOC115493790	LOC115493367
WDFY4			LOC115493795	LOC115493385
			LOC116807836	LOC115493389
			LOC116807955	LOC115493397
			MALSU1	LOC115493408
			MIOS	LOC115493429
			MRPL3	LOC115493430
			MRPL32	LOC115493449
			NEK11	LOC116807087
			NPHP3	LOC116807703
			PAK1IP1	LOC116807723
			RGS20	ORC5
			SGO1	PHYH
			TMEFF1	POC1B
			WDR60	RECQL
			YAE1	RRP7A
				SGSM3
				SSBP1
				SYCE3
				TAFA5
				TBK1
				TMEM19
				TRMU
				VEZT

## Sheet: d_GO_TES_Saddlebrown
source	term_name	term_id	adjusted_p_value	negative_log10_of_adjusted_p_value	term_size	query_size	intersection_size	effective_domain_size	intersections
GO:MF	muscle alpha-actinin binding	GO:0051371	0.0949385	1.02256	4	94	2	12662	NRAP,PKD2L1
GO:MF	calcium-activated potassium channel activity	GO:0015269	0.163743	0.785837	7	94	2	12662	KCNMA1,PKD2L1
GO:MF	calcium activated cation channel activity	GO:0005227	0.167321	0.77645	15	94	2	12662	KCNMA1,PKD2L1
GO:MF	galactolipase activity	GO:0047714	0.167321	0.77645	1	94	1	12662	LOC100231740
GO:MF	adenosine kinase activity	GO:0004001	0.167321	0.77645	1	94	1	12662	ADK
GO:MF	alpha-actinin binding	GO:0051393	0.167321	0.77645	13	94	2	12662	NRAP,PKD2L1
GO:MF	peptide-methionine (S)-S-oxide reductase activity	GO:0008113	0.167321	0.77645	1	94	1	12662	MSRA
GO:MF	actinin binding	GO:0042805	0.167321	0.77645	17	94	2	12662	NRAP,PKD2L1
GO:MF	protein-cysteine S-stearoyltransferase activity	GO:0140439	0.167321	0.77645	1	94	1	12662	ZDHHC6
GO:MF	cholesterol 25-hydroxylase activity	GO:0001567	0.167321	0.77645	1	94	1	12662	CH25H
GO:MF	G protein-coupled neurotransmitter receptor activity involved in regulation of postsynaptic membrane potential	GO:0099579	0.167321	0.77645	1	94	1	12662	ADRB1
GO:MF	large conductance calcium-activated potassium channel activity	GO:0060072	0.167321	0.77645	1	94	1	12662	KCNMA1
GO:MF	sour taste receptor activity	GO:0033040	0.167321	0.77645	1	94	1	12662	PKD2L1
GO:MF	beta1-adrenergic receptor activity	GO:0004940	0.197016	0.705497	2	94	1	12662	ADRB1
GO:MF	alpha-2A adrenergic receptor binding	GO:0031694	0.197016	0.705497	2	94	1	12662	ADRB1
GO:MF	adenylylsulfate kinase activity	GO:0004020	0.197016	0.705497	2	94	1	12662	PAPSS2
GO:MF	G protein-coupled receptor activity involved in regulation of postsynaptic membrane potential	GO:0099530	0.197016	0.705497	2	94	1	12662	ADRB1
GO:MF	G protein-coupled photoreceptor activity	GO:0008020	0.197016	0.705497	2	94	1	12662	OPN4
GO:MF	sulfiredoxin activity	GO:0032542	0.197016	0.705497	2	94	1	12662	SESN2
GO:MF	ion gated channel activity	GO:0022839	0.197016	0.705497	22	94	2	12662	KCNMA1,PKD2L1
GO:MF	sulfate adenylyltransferase activity	GO:0004779	0.197016	0.705497	2	94	1	12662	PAPSS2
GO:MF	sulfate adenylyltransferase (ATP) activity	GO:0004781	0.197016	0.705497	2	94	1	12662	PAPSS2
GO:MF	metallopeptidase activity	GO:0008237	0.197464	0.704511	129	94	4	12662	IDE,STAMBPL1,TLL2,XPNPEP1
GO:MF	oxidoreductase activity, acting on a sulfur group of donors	GO:0016667	0.215132	0.667295	34	94	2	12662	MSRA,SESN2
GO:MF	GTPase regulator activity	GO:0030695	0.215132	0.667295	282	94	6	12662	ADRB1,ARHGAP22,LOC100222268,PSD,RASGEF1A,SESN2
GO:MF	alpha-(1->3)-fucosyltransferase activity	GO:0046920	0.215132	0.667295	4	94	1	12662	FUT11
GO:MF	oxoglutarate dehydrogenase (succinyl-transferring) activity	GO:0004591	0.215132	0.667295	3	94	1	12662	OGDHL
GO:MF	11-cis retinal binding	GO:0005502	0.215132	0.667295	4	94	1	12662	OPN4
GO:MF	thiamine pyrophosphate binding	GO:0030976	0.215132	0.667295	4	94	1	12662	OGDHL
GO:MF	beta-adrenergic receptor activity	GO:0004939	0.215132	0.667295	3	94	1	12662	ADRB1
GO:MF	leucine binding	GO:0070728	0.215132	0.667295	4	94	1	12662	SESN2
GO:MF	Lys63-specific deubiquitinase activity	GO:0061578	0.215132	0.667295	4	94	1	12662	STAMBPL1
GO:MF	phosphopyruvate hydratase activity	GO:0004634	0.215132	0.667295	3	94	1	12662	ENO4
GO:MF	nucleotidyltransferase activity	GO:0016779	0.215132	0.667295	83	94	3	12662	PAPSS2,POLL,POLR3A
GO:MF	phosphatidylethanolamine binding	GO:0008429	0.215132	0.667295	4	94	1	12662	ANXA11
GO:MF	protein tyrosine/serine/threonine phosphatase activity	GO:0008138	0.215132	0.667295	33	94	2	12662	LOC100232794,LOC105759360
GO:MF	antioxidant activity	GO:0016209	0.215132	0.667295	36	94	2	12662	EXOSC3,SESN2
GO:MF	5'-deoxyribose-5-phosphate lyase activity	GO:0051575	0.215132	0.667295	4	94	1	12662	POLL
GO:MF	nucleoside-triphosphatase regulator activity	GO:0060589	0.215132	0.667295	306	94	6	12662	ADRB1,ARHGAP22,LOC100222268,PSD,RASGEF1A,SESN2
GO:MF	acylglycerol lipase activity	GO:0047372	0.215132	0.667295	4	94	1	12662	LOC100231740
GO:MF	taste receptor activity	GO:0008527	0.249238	0.603386	5	94	1	12662	PKD2L1
GO:MF	oxidoreductase activity, acting on the aldehyde or oxo group of donors, disulfide as acceptor	GO:0016624	0.249238	0.603386	5	94	1	12662	OGDHL
GO:MF	insulin binding	GO:0043559	0.249238	0.603386	5	94	1	12662	IDE
GO:MF	sequence-specific single stranded DNA binding	GO:0098847	0.272631	0.564424	6	94	1	12662	STN1
GO:MF	single-stranded telomeric DNA binding	GO:0043047	0.272631	0.564424	6	94	1	12662	STN1
GO:MF	adrenergic receptor binding	GO:0031690	0.272631	0.564424	6	94	1	12662	ADRB1
GO:MF	retinal binding	GO:0016918	0.272631	0.564424	6	94	1	12662	OPN4
GO:MF	L-glutamate transmembrane transporter activity	GO:0005313	0.277243	0.557139	7	94	1	12662	SLC25A22
GO:MF	G protein-coupled neurotransmitter receptor activity	GO:0099528	0.277243	0.557139	7	94	1	12662	ADRB1
GO:MF	adrenergic receptor activity	GO:0004935	0.277243	0.557139	7	94	1	12662	ADRB1
GO:MF	chemorepellent activity	GO:0045499	0.277243	0.557139	7	94	1	12662	NRG3
GO:MF	nucleoside kinase activity	GO:0019206	0.277243	0.557139	7	94	1	12662	ADK
GO:MF	fucosyltransferase activity	GO:0008417	0.277243	0.557139	7	94	1	12662	FUT11
GO:MF	GTPase activator activity	GO:0005096	0.277243	0.557139	271	94	5	12662	ADRB1,ARHGAP22,LOC100222268,PSD,RASGEF1A
GO:MF	oxidoreductase activity, acting on a sulfur group of donors, disulfide as acceptor	GO:0016671	0.282674	0.548714	8	94	1	12662	MSRA
GO:MF	oxidoreductase activity	GO:0016491	0.282674	0.548714	461	94	7	12662	ADO,CH25H,LOC100232471,MSRA,OGDHL,PYROXD2,SESN2
GO:MF	beta-catenin binding	GO:0008013	0.282674	0.548714	50	94	2	12662	DLG5,SUFU
GO:MF	acidic amino acid transmembrane transporter activity	GO:0015172	0.282674	0.548714	8	94	1	12662	SLC25A22
GO:MF	steroid hydroxylase activity	GO:0008395	0.282674	0.548714	8	94	1	12662	CH25H
GO:MF	S100 protein binding	GO:0044548	0.282674	0.548714	8	94	1	12662	ANXA11
GO:MF	carbon-oxygen lyase activity	GO:0016835	0.282733	0.548624	53	94	2	12662	ENO4,POLL
GO:MF	ubiquitin-dependent protein binding	GO:0140036	0.296429	0.528079	10	94	1	12662	IDE
GO:MF	phospholipase binding	GO:0043274	0.296429	0.528079	10	94	1	12662	BLNK
GO:MF	vinculin binding	GO:0017166	0.296429	0.528079	10	94	1	12662	NRAP
GO:MF	ATPase-coupled ion transmembrane transporter activity	GO:0042625	0.296429	0.528079	10	94	1	12662	LOC100190507
GO:MF	peptidase activity	GO:0008233	0.296429	0.528079	387	94	6	12662	IDE,LOC100229828,RBP3,STAMBPL1,TLL2,XPNPEP1
GO:MF	ATPase activity, coupled to transmembrane movement of ions, rotational mechanism	GO:0044769	0.296429	0.528079	10	94	1	12662	LOC100190507
GO:MF	proton-transporting ATPase activity, rotational mechanism	GO:0046961	0.296429	0.528079	10	94	1	12662	LOC100190507
GO:MF	photoreceptor activity	GO:0009881	0.296429	0.528079	9	94	1	12662	OPN4
GO:MF	ubiquitination-like modification-dependent protein binding	GO:0140035	0.296429	0.528079	10	94	1	12662	IDE
GO:MF	cyclosporin A binding	GO:0016018	0.296429	0.528079	10	94	1	12662	PPIF
GO:CC	CST complex	GO:1990879	0.309324	0.509586	1	94	1	12662	STN1
GO:CC	Swi5-Sfr1 complex	GO:0032798	0.309324	0.509586	1	94	1	12662	SFR1
GO:CC	postsynaptic endosome membrane	GO:0098895	0.309324	0.509586	1	94	1	12662	PSD
GO:CC	MMXD complex	GO:0071817	0.309324	0.509586	1	94	1	12662	MMS19
GO:CC	CIA complex	GO:0097361	0.309324	0.509586	1	94	1	12662	MMS19
GO:CC	extrinsic component of postsynaptic endosome membrane	GO:0098999	0.309324	0.509586	1	94	1	12662	PSD
GO:MF	pyrophosphate hydrolysis-driven proton transmembrane transporter activity	GO:0009678	0.315986	0.500332	11	94	1	12662	LOC100190507
GO:MF	GDP-dissociation inhibitor activity	GO:0005092	0.315986	0.500332	11	94	1	12662	SESN2
GO:MF	DNA-directed DNA polymerase activity	GO:0003887	0.33882	0.470031	12	94	1	12662	POLL
GO:MF	isopeptidase activity	GO:0070122	0.360848	0.442676	13	94	1	12662	STAMBPL1
GO:BP	negative regulation of translation in response to stress	GO:0032055	0.364376	0.43845	2	94	1	12662	SESN2
GO:BP	release of cytochrome c from mitochondria	GO:0001836	0.364376	0.43845	20	94	2	12662	GHITM,PPIF
GO:BP	heme a metabolic process	GO:0046160	0.364376	0.43845	2	94	1	12662	LOC100232471
GO:BP	zonula adherens assembly	GO:0045186	0.364376	0.43845	1	94	1	12662	DLG5
GO:BP	positive regulation of heart rate by epinephrine-norepinephrine	GO:0001996	0.364376	0.43845	2	94	1	12662	ADRB1
GO:BP	negative regulation of skeletal muscle tissue growth	GO:0048632	0.364376	0.43845	2	94	1	12662	TLL2
GO:BP	positive regulation of the force of heart contraction by chemical signal	GO:0003099	0.364376	0.43845	2	94	1	12662	ADRB1
GO:BP	detection of chemical stimulus involved in sensory perception of sour taste	GO:0001581	0.364376	0.43845	1	94	1	12662	PKD2L1
GO:BP	intestinal lipid catabolic process	GO:0044258	0.364376	0.43845	1	94	1	12662	LOC100231740
GO:BP	positive regulation of the force of heart contraction by epinephrine-norepinephrine	GO:0001997	0.364376	0.43845	2	94	1	12662	ADRB1
GO:BP	regulation of circadian sleep/wake cycle, sleep	GO:0045187	0.364376	0.43845	2	94	1	12662	ADRB1
GO:BP	response to calcium ion	GO:0051592	0.364376	0.43845	53	94	3	12662	ANXA11,KCNMA1,PPIF
GO:BP	AMP salvage	GO:0044209	0.364376	0.43845	2	94	1	12662	ADK
GO:BP	regulation of cellular respiration	GO:0043457	0.364376	0.43845	21	94	2	12662	IDE,PPIF
GO:BP	obsolete oxidation-reduction process	GO:0055114	0.364376	0.43845	337	94	7	12662	ADO,CH25H,EXOSC3,LOC100232471,MSRA,OGDHL,PYROXD2
GO:BP	peptide catabolic process	GO:0043171	0.364376	0.43845	14	94	2	12662	IDE,XPNPEP1
GO:BP	positive regulation of hippo signaling	GO:0035332	0.364376	0.43845	2	94	1	12662	DLG5
GO:BP	thermotaxis	GO:0043052	0.364376	0.43845	2	94	1	12662	OPN4
GO:BP	B cell chemotaxis	GO:0035754	0.364376	0.43845	2	94	1	12662	CH25H
GO:BP	sensory perception of sour taste	GO:0050915	0.364376	0.43845	2	94	1	12662	PKD2L1
GO:BP	smooth muscle contraction involved in micturition	GO:0060083	0.364376	0.43845	2	94	1	12662	KCNMA1
GO:BP	antigen processing and presentation of endogenous peptide antigen	GO:0002483	0.364376	0.43845	1	94	1	12662	IDE
GO:BP	positive regulation of transcription from RNA polymerase II promoter in response to oxidative stress	GO:0036091	0.364376	0.43845	2	94	1	12662	SESN2
GO:BP	dATP biosynthetic process	GO:0006175	0.364376	0.43845	1	94	1	12662	ADK
GO:BP	response to carbon monoxide	GO:0034465	0.364376	0.43845	1	94	1	12662	KCNMA1
GO:BP	norepinephrine-epinephrine-mediated vasodilation involved in regulation of systemic arterial blood pressure	GO:0002025	0.364376	0.43845	2	94	1	12662	ADRB1
GO:BP	positive regulation of DNA recombination	GO:0045911	0.364376	0.43845	23	94	2	12662	MMS19,SHLD2
GO:BP	ubiquitin recycling	GO:0010992	0.364376	0.43845	2	94	1	12662	IDE
GO:BP	bradykinin catabolic process	GO:0010815	0.364376	0.43845	4	94	2	12662	IDE,XPNPEP1
GO:BP	galactolipid catabolic process	GO:0019376	0.364376	0.43845	2	94	1	12662	LOC100231740
GO:BP	regulation of mitochondrial membrane permeability involved in programmed necrotic cell death	GO:1902445	0.364376	0.43845	1	94	1	12662	PPIF
GO:BP	negative regulation of translation in response to endoplasmic reticulum stress	GO:1902010	0.364376	0.43845	1	94	1	12662	SESN2
GO:BP	antigen processing and presentation of endogenous antigen	GO:0019883	0.364376	0.43845	2	94	1	12662	IDE
GO:BP	regulation of aerobic respiration	GO:1903715	0.364376	0.43845	13	94	2	12662	IDE,PPIF
GO:BP	antigen processing and presentation of endogenous peptide antigen via MHC class I	GO:0019885	0.364376	0.43845	1	94	1	12662	IDE
GO:BP	positive regulation of mitochondrial fusion	GO:0010636	0.364376	0.43845	2	94	1	12662	ZDHHC6
GO:BP	positive regulation of double-strand break repair	GO:2000781	0.364376	0.43845	20	94	2	12662	MMS19,SHLD2
GO:BP	negative regulation of mitochondrion organization	GO:0010823	0.364376	0.43845	22	94	2	12662	GHITM,PPIF
GO:BP	smoothened signaling pathway involved in ventral spinal cord interneuron specification	GO:0021775	0.364376	0.43845	2	94	1	12662	SUFU
GO:BP	smoothened signaling pathway involved in spinal cord motor neuron cell fate specification	GO:0021776	0.364376	0.43845	2	94	1	12662	SUFU
GO:BP	purine deoxyribonucleoside triphosphate biosynthetic process	GO:0009216	0.364376	0.43845	2	94	1	12662	ADK
GO:BP	regulation of mitochondrion organization	GO:0010821	0.364376	0.43845	60	94	3	12662	GHITM,PPIF,ZDHHC6
GO:BP	insulin catabolic process	GO:1901143	0.364376	0.43845	1	94	1	12662	IDE
GO:BP	negative regulation of oxidative phosphorylation	GO:0090324	0.364376	0.43845	2	94	1	12662	PPIF
GO:BP	cellular defense response	GO:0006968	0.364376	0.43845	1	94	1	12662	LOC100231740
GO:BP	optokinetic behavior	GO:0007634	0.364376	0.43845	1	94	1	12662	OPN4
GO:BP	regulation of release of cytochrome c from mitochondria	GO:0090199	0.364376	0.43845	18	94	2	12662	GHITM,PPIF
GO:BP	recombinational repair	GO:0000725	0.364376	0.43845	72	94	4	12662	MMS19,POLL,SFR1,SHLD2
GO:BP	regulation of proton-transporting ATPase activity, rotational mechanism	GO:0010849	0.364376	0.43845	1	94	1	12662	PPIF
GO:BP	heme A biosynthetic process	GO:0006784	0.364376	0.43845	2	94	1	12662	LOC100232471
GO:BP	double-strand break repair via homologous recombination	GO:0000724	0.364376	0.43845	71	94	4	12662	MMS19,POLL,SFR1,SHLD2
GO:BP	negative regulation of release of cytochrome c from mitochondria	GO:0090201	0.364376	0.43845	10	94	2	12662	GHITM,PPIF
GO:BP	negative regulation of oxidative phosphorylation uncoupler activity	GO:2000276	0.364376	0.43845	2	94	1	12662	PPIF
GO:BP	cerebellar neuron development	GO:0098749	0.364376	0.43845	1	94	1	12662	NANOS1
GO:BP	chemorepulsion involved in interneuron migration from the subpallium to the cortex	GO:0021842	0.364376	0.43845	1	94	1	12662	NRG3
GO:BP	directional guidance of interneurons involved in migration from the subpallium to the cortex	GO:0021840	0.364376	0.43845	1	94	1	12662	NRG3
GO:BP	purine deoxyribonucleotide biosynthetic process	GO:0009153	0.364376	0.43845	1	94	1	12662	ADK
GO:MF	cytoskeletal protein binding	GO:0008092	0.369305	0.432615	526	94	7	12662	ABLIM1,DLG5,KCNMA1,KIF11,NRAP,PKD2L1,TUBGCP2
GO:CC	sperm head plasma membrane	GO:1990913	0.369826	0.432002	2	94	1	12662	OPN4
GO:CC	postsynaptic density, intracellular component	GO:0099092	0.369826	0.432002	2	94	1	12662	PSD
GO:CC	spindle	GO:0005819	0.369826	0.432002	191	94	5	12662	ANXA11,KIF11,MMS19,TFDP2,TUBGCP2
GO:CC	Golgi cisterna membrane	GO:0032580	0.369826	0.432002	23	94	2	12662	CSGALNACT2,FUT11
GO:MF	metalloaminopeptidase activity	GO:0070006	0.37042	0.431306	14	94	1	12662	XPNPEP1
GO:MF	triglyceride lipase activity	GO:0004806	0.37042	0.431306	14	94	1	12662	LOC100231740
GO:MF	metalloendopeptidase activity	GO:0004222	0.37042	0.431306	72	94	2	12662	IDE,TLL2
GO:MF	isoprenoid binding	GO:0019840	0.378069	0.422429	15	94	1	12662	OPN4
GO:MF	guanyl-nucleotide exchange factor activity	GO:0005085	0.378069	0.422429	152	94	3	12662	ADRB1,PSD,RASGEF1A
GO:MF	retinoid binding	GO:0005501	0.378069	0.422429	15	94	1	12662	OPN4
GO:CC	sperm head	GO:0061827	0.381016	0.419056	5	94	1	12662	OPN4
GO:CC	azurophil granule	GO:0042582	0.381016	0.419056	5	94	1	12662	ANXA11
GO:CC	Golgi cisterna	GO:0031985	0.381016	0.419056	39	94	2	12662	CSGALNACT2,FUT11
GO:CC	nucleotide-activated protein kinase complex	GO:0031588	0.381016	0.419056	5	94	1	12662	SESN2
GO:CC	nuclear telomere cap complex	GO:0000783	0.381016	0.419056	5	94	1	12662	STN1
GO:CC	telomere cap complex	GO:0000782	0.381016	0.419056	5	94	1	12662	STN1
GO:CC	mitochondrial permeability transition pore complex	GO:0005757	0.381016	0.419056	4	94	1	12662	PPIF
GO:CC	chromosome, telomeric repeat region	GO:0140445	0.381016	0.419056	5	94	1	12662	STN1
GO:CC	primary lysosome	GO:0005766	0.381016	0.419056	5	94	1	12662	ANXA11
GO:CC	postsynaptic specialization, intracellular component	GO:0099091	0.381016	0.419056	3	94	1	12662	PSD
GO:CC	postsynaptic endosome	GO:0098845	0.381016	0.419056	4	94	1	12662	PSD
GO:CC	sperm plasma membrane	GO:0097524	0.381016	0.419056	4	94	1	12662	OPN4
GO:CC	muscle tendon junction	GO:0005927	0.381016	0.419056	4	94	1	12662	NRAP
GO:CC	phosphopyruvate hydratase complex	GO:0000015	0.381016	0.419056	3	94	1	12662	ENO4
GO:BP	regulation of double-strand break repair via homologous recombination	GO:0010569	0.382092	0.417832	26	94	2	12662	MMS19,SHLD2
GO:BP	aerobic respiration	GO:0009060	0.388834	0.410236	72	94	3	12662	IDE,OGDHL,PPIF
GO:MF	DNA polymerase activity	GO:0034061	0.392249	0.406438	16	94	1	12662	POLL
GO:MF	oxidoreductase activity, acting on single donors with incorporation of molecular oxygen, incorporation of two atoms of oxygen	GO:0016702	0.392249	0.406438	16	94	1	12662	ADO
GO:BP	sulfate assimilation	GO:0000103	0.403115	0.394571	3	94	1	12662	PAPSS2
GO:BP	dATP metabolic process	GO:0046060	0.403115	0.394571	3	94	1	12662	ADK
GO:BP	mammary placode formation	GO:0060596	0.403115	0.394571	3	94	1	12662	NRG3
GO:BP	dermatan sulfate proteoglycan biosynthetic process	GO:0050651	0.403115	0.394571	3	94	1	12662	CSGALNACT2
GO:BP	deoxyribonucleoside triphosphate biosynthetic process	GO:0009202	0.403115	0.394571	3	94	1	12662	ADK
GO:BP	protein localization to adherens junction	GO:0071896	0.403115	0.394571	3	94	1	12662	DLG5
GO:BP	positive regulation of blood pressure by epinephrine-norepinephrine	GO:0003321	0.403115	0.394571	3	94	1	12662	ADRB1
GO:BP	urinary bladder smooth muscle contraction	GO:0014832	0.403115	0.394571	3	94	1	12662	KCNMA1
GO:BP	negative regulation of cell volume	GO:0045794	0.403115	0.394571	3	94	1	12662	KCNMA1
GO:BP	calcium ion export across plasma membrane	GO:1990034	0.403115	0.394571	3	94	1	12662	SLC35G1
GO:BP	positive regulation of mitochondrion organization	GO:0010822	0.403115	0.394571	31	94	2	12662	PPIF,ZDHHC6
GO:BP	hyaloid vascular plexus regression	GO:1990384	0.403115	0.394571	3	94	1	12662	OPN4
GO:BP	negative regulation of smoothened signaling pathway involved in dorsal/ventral neural tube patterning	GO:1901621	0.403115	0.394571	3	94	1	12662	SUFU
GO:BP	antigen processing and presentation of peptide antigen via MHC class I	GO:0002474	0.403115	0.394571	3	94	1	12662	IDE
GO:BP	base-excision repair, gap-filling	GO:0006287	0.403115	0.394571	3	94	1	12662	POLL
GO:BP	double-strand break repair	GO:0006302	0.403115	0.394571	135	94	4	12662	MMS19,POLL,SFR1,SHLD2
GO:BP	double-strand break repair via nonhomologous end joining	GO:0006303	0.403115	0.394571	29	94	2	12662	POLL,SHLD2
GO:BP	circadian sleep/wake cycle, sleep	GO:0050802	0.403115	0.394571	3	94	1	12662	ADRB1
GO:MF	oxidoreductase activity, acting on single donors with incorporation of molecular oxygen	GO:0016701	0.405604	0.391898	17	94	1	12662	ADO
GO:MF	gamma-tubulin binding	GO:0043015	0.405604	0.391898	17	94	1	12662	TUBGCP2
GO:MF	protein tyrosine phosphatase activity	GO:0004725	0.408898	0.388385	81	94	2	12662	LOC100232794,LOC105759360
GO:MF	enzyme regulator activity	GO:0030234	0.409805	0.387422	456	94	6	12662	ADRB1,ARHGAP22,LOC100222268,PSD,RASGEF1A,SESN2
GO:MF	vitamin binding	GO:0019842	0.415946	0.380963	83	94	2	12662	OGDHL,OPN4
KEGG	Citrate cycle (TCA cycle)	KEGG:00020	0.416079	0.380824	15	94	1	12662	OGDHL
KEGG	Purine metabolism	KEGG:00230	0.416079	0.380824	92	94	3	12662	ADK,ENTPD1,PAPSS2
KEGG	p53 signaling pathway	KEGG:04115	0.416079	0.380824	54	94	2	12662	FAS,SESN2
KEGG	Non-homologous end-joining	KEGG:03450	0.416079	0.380824	11	94	1	12662	POLL
KEGG	RNA polymerase	KEGG:03020	0.416079	0.380824	15	94	1	12662	POLR3A
KEGG	Sulfur metabolism	KEGG:00920	0.416079	0.380824	6	94	1	12662	PAPSS2
KEGG	Porphyrin and chlorophyll metabolism	KEGG:00860	0.416079	0.380824	16	94	1	12662	LOC100232471
KEGG	Glycosaminoglycan biosynthesis - chondroitin sulfate / dermatan sulfate	KEGG:00532	0.416079	0.380824	15	94	1	12662	CSGALNACT2
KEGG	Oxidative phosphorylation	KEGG:00190	0.416079	0.380824	72	94	2	12662	LOC100190507,LOC100232471
KEGG	Selenocompound metabolism	KEGG:00450	0.416079	0.380824	10	94	1	12662	PAPSS2
GO:CC	DNA recombinase mediator complex	GO:0033061	0.420506	0.376228	6	94	1	12662	SFR1
GO:CC	extrinsic component of endosome membrane	GO:0031313	0.420506	0.376228	6	94	1	12662	PSD
GO:BP	adenylate cyclase-activating adrenergic receptor signaling pathway	GO:0071880	0.424421	0.372203	5	94	1	12662	ADRB1
GO:BP	negative regulation of cellular respiration	GO:1901856	0.424421	0.372203	4	94	1	12662	PPIF
GO:BP	ventral spinal cord interneuron specification	GO:0021521	0.424421	0.372203	5	94	1	12662	SUFU
GO:BP	micturition	GO:0060073	0.424421	0.372203	4	94	1	12662	KCNMA1
GO:BP	regulation of smoothened signaling pathway involved in dorsal/ventral neural tube patterning	GO:1901620	0.424421	0.372203	5	94	1	12662	SUFU
GO:BP	cytoplasmic sequestering of transcription factor	GO:0042994	0.424421	0.372203	5	94	1	12662	SUFU
GO:BP	substrate-independent telencephalic tangential migration	GO:0021826	0.424421	0.372203	5	94	1	12662	NRG3
GO:BP	insulin metabolic process	GO:1901142	0.424421	0.372203	4	94	1	12662	IDE
GO:BP	regulation of circadian sleep/wake cycle	GO:0042749	0.424421	0.372203	4	94	1	12662	ADRB1
GO:BP	thermoception	GO:0050955	0.424421	0.372203	5	94	1	12662	OPN4
GO:BP	detection of temperature stimulus involved in thermoception	GO:0050960	0.424421	0.372203	4	94	1	12662	OPN4
GO:BP	amyloid-beta clearance by cellular catabolic process	GO:0150094	0.424421	0.372203	4	94	1	12662	IDE
GO:BP	galactolipid metabolic process	GO:0019374	0.424421	0.372203	5	94	1	12662	LOC100231740
GO:BP	purine ribonucleoside salvage	GO:0006166	0.424421	0.372203	5	94	1	12662	ADK
GO:BP	cellular oxidant detoxification	GO:0098869	0.424421	0.372203	33	94	2	12662	EXOSC3,SESN2
GO:BP	AMP biosynthetic process	GO:0006167	0.424421	0.372203	5	94	1	12662	ADK
GO:BP	substrate-independent telencephalic tangential interneuron migration	GO:0021843	0.424421	0.372203	5	94	1	12662	NRG3
GO:BP	smoothened signaling pathway involved in ventral spinal cord patterning	GO:0021910	0.424421	0.372203	5	94	1	12662	SUFU
GO:BP	hormone catabolic process	GO:0042447	0.424421	0.372203	5	94	1	12662	IDE
GO:BP	circadian sleep/wake cycle process	GO:0022410	0.424421	0.372203	5	94	1	12662	ADRB1
GO:BP	sleep	GO:0030431	0.424421	0.372203	5	94	1	12662	ADRB1
GO:BP	DNA recombination	GO:0006310	0.424421	0.372203	147	94	4	12662	MMS19,POLL,SFR1,SHLD2
GO:BP	mammary gland formation	GO:0060592	0.424421	0.372203	5	94	1	12662	NRG3
GO:BP	cell fate specification involved in pattern specification	GO:0060573	0.424421	0.372203	5	94	1	12662	SUFU
GO:BP	regulation of systemic arterial blood pressure by norepinephrine-epinephrine	GO:0001993	0.424421	0.372203	4	94	1	12662	ADRB1
GO:BP	interneuron migration from the subpallium to the cortex	GO:0021830	0.424421	0.372203	5	94	1	12662	NRG3
GO:BP	nucleoside salvage	GO:0043174	0.424421	0.372203	5	94	1	12662	ADK
GO:BP	detection of chemical stimulus involved in sensory perception of taste	GO:0050912	0.424421	0.372203	5	94	1	12662	PKD2L1
GO:BP	regulation of lipophagy	GO:1904502	0.424421	0.372203	5	94	1	12662	SESN2
GO:BP	cellular respiration	GO:0045333	0.424421	0.372203	90	94	3	12662	IDE,OGDHL,PPIF
GO:BP	positive regulation of DNA repair	GO:0045739	0.424421	0.372203	34	94	2	12662	MMS19,SHLD2
GO:BP	smoothened signaling pathway	GO:0007224	0.424421	0.372203	90	94	3	12662	DLG5,PKD2L1,SUFU
GO:BP	purine deoxyribonucleoside triphosphate metabolic process	GO:0009215	0.424421	0.372203	5	94	1	12662	ADK
GO:BP	regulation of oxidative phosphorylation uncoupler activity	GO:2000275	0.424421	0.372203	4	94	1	12662	PPIF
GO:BP	cellular detoxification	GO:1990748	0.424421	0.372203	39	94	2	12662	EXOSC3,SESN2
GO:BP	regulation of skeletal muscle tissue growth	GO:0048631	0.424421	0.372203	4	94	1	12662	TLL2
GO:BP	negative regulation of neuron migration	GO:2001223	0.424421	0.372203	5	94	1	12662	NRG3
GO:BP	apoptotic mitochondrial changes	GO:0008637	0.424421	0.372203	37	94	2	12662	GHITM,PPIF
GO:BP	regulation of transcription from RNA polymerase II promoter in response to oxidative stress	GO:0043619	0.424421	0.372203	5	94	1	12662	SESN2
GO:BP	mitochondrion organization	GO:0007005	0.424421	0.372203	222	94	5	12662	GHITM,PPIF,PYROXD2,SESN2,ZDHHC6
GO:BP	urinary tract smooth muscle contraction	GO:0014848	0.424421	0.372203	5	94	1	12662	KCNMA1
GO:BP	dermatan sulfate proteoglycan metabolic process	GO:0050655	0.424421	0.372203	4	94	1	12662	CSGALNACT2
GO:BP	positive regulation of lipophagy	GO:1904504	0.424421	0.372203	5	94	1	12662	SESN2
GO:BP	regulation of the force of heart contraction by chemical signal	GO:0003057	0.424421	0.372203	5	94	1	12662	ADRB1
GO:MF	calcium-dependent phospholipid binding	GO:0005544	0.43006	0.366471	19	94	1	12662	ANXA11
GO:MF	protein-cysteine S-palmitoyltransferase activity	GO:0019706	0.431873	0.364644	20	94	1	12662	ZDHHC6
GO:MF	protein-cysteine S-acyltransferase activity	GO:0019707	0.431873	0.364644	20	94	1	12662	ZDHHC6
GO:MF	potassium channel activity	GO:0005267	0.431873	0.364644	87	94	2	12662	KCNMA1,PKD2L1
GO:MF	drug binding	GO:0008144	0.431873	0.364644	20	94	1	12662	PPIF
GO:MF	oxidoreductase activity, acting on peroxide as acceptor	GO:0016684	0.437263	0.359257	21	94	1	12662	SESN2
GO:MF	telomeric DNA binding	GO:0042162	0.437263	0.359257	21	94	1	12662	STN1
GO:MF	DNA-directed 5'-3' RNA polymerase activity	GO:0003899	0.437263	0.359257	21	94	1	12662	POLR3A
GO:MF	enzyme activator activity	GO:0008047	0.437263	0.359257	375	94	5	12662	ADRB1,ARHGAP22,LOC100222268,PSD,RASGEF1A
GO:CC	Golgi stack	GO:0005795	0.437994	0.358532	56	94	2	12662	CSGALNACT2,FUT11
GO:CC	sperm principal piece	GO:0097228	0.437994	0.358532	9	94	1	12662	ENO4
GO:CC	proton-transporting V-type ATPase, V0 domain	GO:0033179	0.437994	0.358532	9	94	1	12662	LOC100190507
GO:CC	TOR complex	GO:0038201	0.437994	0.358532	9	94	1	12662	SESN2
GO:CC	microvillus membrane	GO:0031528	0.437994	0.358532	7	94	1	12662	LOC100218935
GO:CC	specific granule	GO:0042581	0.437994	0.358532	8	94	1	12662	ANXA11
GO:CC	coated membrane	GO:0048475	0.437994	0.358532	58	94	2	12662	AP3M1,SEC31B
GO:CC	WASH complex	GO:0071203	0.437994	0.358532	10	94	1	12662	WASHC2C
GO:CC	RNA polymerase III complex	GO:0005666	0.437994	0.358532	9	94	1	12662	POLR3A
GO:CC	GATOR2 complex	GO:0061700	0.437994	0.358532	10	94	1	12662	SESN2
GO:CC	membrane coat	GO:0030117	0.437994	0.358532	58	94	2	12662	AP3M1,SEC31B
GO:CC	fascia adherens	GO:0005916	0.437994	0.358532	7	94	1	12662	NRAP
GO:CC	interstitial matrix	GO:0005614	0.437994	0.358532	7	94	1	12662	KAZALD1
GO:CC	Atg1/ULK1 kinase complex	GO:1990316	0.437994	0.358532	8	94	1	12662	SESN2
GO:CC	TORC2 complex	GO:0031932	0.437994	0.358532	8	94	1	12662	SESN2
GO:BP	detoxification	GO:0098754	0.440444	0.356109	43	94	2	12662	EXOSC3,SESN2
GO:BP	regulation of double-strand break repair	GO:2000779	0.440444	0.356109	45	94	2	12662	MMS19,SHLD2
GO:BP	negative regulation of growth	GO:0045926	0.440444	0.356109	104	94	3	12662	ADRB1,SESN2,TLL2
GO:BP	maintenance of cell polarity	GO:0030011	0.440444	0.356109	6	94	1	12662	DLG5
GO:BP	response to water	GO:0009415	0.440444	0.356109	6	94	1	12662	PKD2L1
GO:BP	cellular potassium ion homeostasis	GO:0030007	0.440444	0.356109	6	94	1	12662	KCNMA1
GO:BP	circadian sleep/wake cycle	GO:0042745	0.440444	0.356109	6	94	1	12662	ADRB1
GO:BP	cellular response to leucine	GO:0071233	0.440444	0.356109	6	94	1	12662	SESN2
GO:BP	calcium ion export	GO:1901660	0.440444	0.356109	6	94	1	12662	SLC35G1
GO:BP	detection of stimulus involved in sensory perception	GO:0050906	0.440444	0.356109	44	94	2	12662	OPN4,PKD2L1
GO:BP	response to leucine	GO:0043201	0.440444	0.356109	6	94	1	12662	SESN2
GO:BP	mitochondrial membrane organization	GO:0007006	0.440444	0.356109	45	94	2	12662	GHITM,PPIF
GO:BP	cellular response to toxic substance	GO:0097237	0.440444	0.356109	42	94	2	12662	EXOSC3,SESN2
GO:BP	deoxyribose phosphate biosynthetic process	GO:0046385	0.440444	0.356109	6	94	1	12662	ADK
GO:BP	negative regulation of developmental growth	GO:0048640	0.440444	0.356109	44	94	2	12662	ADRB1,TLL2
GO:BP	cellular response to leucine starvation	GO:1990253	0.440444	0.356109	6	94	1	12662	SESN2
GO:BP	regulation of translation in response to endoplasmic reticulum stress	GO:0036490	0.440444	0.356109	6	94	1	12662	SESN2
GO:BP	2'-deoxyribonucleotide biosynthetic process	GO:0009265	0.440444	0.356109	6	94	1	12662	ADK
GO:BP	skeletal muscle tissue growth	GO:0048630	0.440444	0.356109	6	94	1	12662	TLL2
GO:MF	estrogen receptor binding	GO:0030331	0.444636	0.351996	22	94	1	12662	MMS19
GO:MF	potassium ion transmembrane transporter activity	GO:0015079	0.444636	0.351996	96	94	2	12662	KCNMA1,PKD2L1
GO:MF	adenylyltransferase activity	GO:0070566	0.444636	0.351996	24	94	1	12662	PAPSS2
GO:MF	ATPase-coupled cation transmembrane transporter activity	GO:0019829	0.444636	0.351996	24	94	1	12662	LOC100190507
GO:MF	peptide hormone binding	GO:0017046	0.444636	0.351996	24	94	1	12662	IDE
GO:MF	peptide binding	GO:0042277	0.444636	0.351996	96	94	2	12662	IDE,PPIF
GO:MF	5'-3' RNA polymerase activity	GO:0034062	0.444636	0.351996	23	94	1	12662	POLR3A
GO:MF	serine-type peptidase activity	GO:0008236	0.444636	0.351996	97	94	2	12662	LOC100229828,RBP3
GO:MF	insulin-like growth factor binding	GO:0005520	0.444636	0.351996	23	94	1	12662	KAZALD1
GO:MF	RNA polymerase activity	GO:0097747	0.444636	0.351996	23	94	1	12662	POLR3A
GO:BP	response to inorganic substance	GO:0010035	0.447223	0.349476	180	94	4	12662	ANXA11,KCNMA1,PKD2L1,PPIF
GO:MF	nucleobase-containing compound kinase activity	GO:0019205	0.449034	0.347721	25	94	1	12662	ADK
GO:MF	aminopeptidase activity	GO:0004177	0.449034	0.347721	25	94	1	12662	XPNPEP1
GO:MF	serine hydrolase activity	GO:0017171	0.449034	0.347721	100	94	2	12662	LOC100229828,RBP3
GO:BP	response to acid chemical	GO:0001101	0.451833	0.345022	46	94	2	12662	PKD2L1,SESN2
GO:MF	L-amino acid transmembrane transporter activity	GO:0015179	0.452698	0.344192	28	94	1	12662	SLC25A22
GO:MF	G protein-coupled amine receptor activity	GO:0008227	0.452698	0.344192	27	94	1	12662	ADRB1
GO:MF	neurotransmitter receptor activity involved in regulation of postsynaptic membrane potential	GO:0099529	0.452698	0.344192	28	94	1	12662	ADRB1
GO:MF	S-acyltransferase activity	GO:0016417	0.452698	0.344192	26	94	1	12662	ZDHHC6
GO:MF	palmitoyltransferase activity	GO:0016409	0.452698	0.344192	28	94	1	12662	ZDHHC6
GO:MF	transcription factor binding	GO:0008134	0.452698	0.344192	293	94	4	12662	MMS19,PDCD11,SUFU,TFDP2
GO:MF	molecular function regulator	GO:0098772	0.452698	0.344192	519	94	6	12662	ADRB1,ARHGAP22,LOC100222268,PSD,RASGEF1A,SESN2
GO:MF	acetylgalactosaminyltransferase activity	GO:0008376	0.452698	0.344192	26	94	1	12662	CSGALNACT2
GO:MF	oxidoreductase activity, acting on the aldehyde or oxo group of donors	GO:0016903	0.452698	0.344192	28	94	1	12662	OGDHL
GO:MF	SH2 domain binding	GO:0042169	0.452698	0.344192	27	94	1	12662	BLNK
GO:MF	sodium channel activity	GO:0005272	0.452698	0.344192	27	94	1	12662	PKD2L1
GO:BP	response to metal ion	GO:0010038	0.454511	0.342456	108	94	3	12662	ANXA11,KCNMA1,PPIF
GO:BP	detection of temperature stimulus involved in sensory perception	GO:0050961	0.454602	0.342369	7	94	1	12662	OPN4
GO:BP	positive regulation of double-strand break repair via nonhomologous end joining	GO:2001034	0.454602	0.342369	7	94	1	12662	SHLD2
GO:BP	antigen processing and presentation of peptide antigen	GO:0048002	0.454602	0.342369	7	94	1	12662	IDE
GO:BP	apical protein localization	GO:0045176	0.454602	0.342369	7	94	1	12662	DLG5
GO:BP	positive regulation of double-strand break repair via homologous recombination	GO:1905168	0.454602	0.342369	7	94	1	12662	MMS19
GO:BP	metanephric collecting duct development	GO:0072205	0.454602	0.342369	7	94	1	12662	DLG5
GO:BP	fucosylation	GO:0036065	0.454602	0.342369	7	94	1	12662	FUT11
GO:BP	negative regulation of apoptotic signaling pathway	GO:2001234	0.454602	0.342369	112	94	3	12662	GHITM,PPIF,RTKN2
GO:BP	regulation of oxidative phosphorylation	GO:0002082	0.454602	0.342369	7	94	1	12662	PPIF
GO:BP	diet induced thermogenesis	GO:0002024	0.454602	0.342369	7	94	1	12662	ADRB1
GO:BP	negative regulation of ATPase activity	GO:0032780	0.454602	0.342369	7	94	1	12662	PPIF
GO:BP	purine nucleotide salvage	GO:0032261	0.454602	0.342369	7	94	1	12662	ADK
GO:BP	lipophagy	GO:0061724	0.454602	0.342369	7	94	1	12662	SESN2
GO:BP	cellular response to acidic pH	GO:0071468	0.454602	0.342369	7	94	1	12662	PKD2L1
GO:BP	regulation of DNA recombination	GO:0000018	0.454894	0.34209	49	94	2	12662	MMS19,SHLD2
GO:MF	calcium-dependent protein binding	GO:0048306	0.459663	0.337561	29	94	1	12662	ANXA11
GO:MF	peptidyl-prolyl cis-trans isomerase activity	GO:0003755	0.459663	0.337561	29	94	1	12662	PPIF
GO:MF	cis-trans isomerase activity	GO:0016859	0.462632	0.334765	30	94	1	12662	PPIF
GO:MF	nuclear receptor coactivator activity	GO:0030374	0.462632	0.334765	30	94	1	12662	SFR1
GO:MF	scavenger receptor activity	GO:0005044	0.462632	0.334765	30	94	1	12662	LOC100229828
GO:CC	clathrin adaptor complex	GO:0030131	0.468613	0.329186	11	94	1	12662	AP3M1
GO:MF	hexosyltransferase activity	GO:0016758	0.468688	0.329116	113	94	2	12662	CSGALNACT2,FUT11
GO:BP	negative regulation of multicellular organism growth	GO:0040015	0.472507	0.325592	8	94	1	12662	ADRB1
GO:BP	nucleoside biosynthetic process	GO:0009163	0.472507	0.325592	8	94	1	12662	ADK
GO:BP	purine ribonucleoside biosynthetic process	GO:0046129	0.472507	0.325592	8	94	1	12662	ADK
GO:BP	deoxyribonucleotide biosynthetic process	GO:0009263	0.472507	0.325592	8	94	1	12662	ADK
GO:BP	smoothened signaling pathway involved in dorsal/ventral neural tube patterning	GO:0060831	0.472507	0.325592	8	94	1	12662	SUFU
GO:BP	anatomical structure regression	GO:0060033	0.472507	0.325592	8	94	1	12662	OPN4
GO:BP	regulation of mitochondrial fusion	GO:0010635	0.472507	0.325592	8	94	1	12662	ZDHHC6
GO:BP	purine nucleoside biosynthetic process	GO:0042451	0.472507	0.325592	8	94	1	12662	ADK
GO:BP	regulation of proton transport	GO:0010155	0.472507	0.325592	8	94	1	12662	PPIF
GO:BP	positive regulation of response to DNA damage stimulus	GO:2001022	0.472507	0.325592	52	94	2	12662	MMS19,SHLD2
GO:BP	regulation of mitotic centrosome separation	GO:0046602	0.472507	0.325592	8	94	1	12662	KIF11
GO:BP	negative regulation of intrinsic apoptotic signaling pathway	GO:2001243	0.472507	0.325592	52	94	2	12662	PPIF,RTKN2
GO:BP	spinal cord motor neuron cell fate specification	GO:0021520	0.472507	0.325592	8	94	1	12662	SUFU
GO:BP	ribonucleoside biosynthetic process	GO:0042455	0.472507	0.325592	8	94	1	12662	ADK
GO:BP	anterograde synaptic vesicle transport	GO:0048490	0.474464	0.323797	9	94	1	12662	AP3M1
GO:BP	deoxyribonucleoside triphosphate metabolic process	GO:0009200	0.474464	0.323797	9	94	1	12662	ADK
GO:BP	purine deoxyribonucleotide metabolic process	GO:0009151	0.474464	0.323797	9	94	1	12662	ADK
GO:BP	negative regulation of systemic arterial blood pressure	GO:0003085	0.474464	0.323797	9	94	1	12662	ADRB1
GO:BP	regulation of smoothened signaling pathway	GO:0008589	0.474464	0.323797	53	94	2	12662	DLG5,SUFU
GO:BP	regulation of circadian rhythm	GO:0042752	0.474464	0.323797	53	94	2	12662	ADRB1,OPN4
GO:BP	mitochondrial DNA metabolic process	GO:0032042	0.474464	0.323797	9	94	1	12662	SESN2
GO:BP	protein maturation by iron-sulfur cluster transfer	GO:0097428	0.474464	0.323797	9	94	1	12662	MMS19
GO:BP	positive regulation of release of cytochrome c from mitochondria	GO:0090200	0.474464	0.323797	9	94	1	12662	PPIF
GO:BP	synaptic vesicle cytoskeletal transport	GO:0099514	0.474464	0.323797	9	94	1	12662	AP3M1
GO:BP	synaptic vesicle transport along microtubule	GO:0099517	0.474464	0.323797	9	94	1	12662	AP3M1
GO:BP	regulation of nuclear-transcribed mRNA catabolic process, deadenylation-dependent decay	GO:1900151	0.474464	0.323797	9	94	1	12662	NANOS1
GO:BP	positive regulation of nuclear-transcribed mRNA catabolic process, deadenylation-dependent decay	GO:1900153	0.474464	0.323797	9	94	1	12662	NANOS1
GO:BP	glycosyl compound biosynthetic process	GO:1901659	0.474464	0.323797	9	94	1	12662	ADK
GO:BP	regulation of translation in response to stress	GO:0043555	0.474464	0.323797	9	94	1	12662	SESN2
GO:BP	cell fate commitment involved in pattern specification	GO:0060581	0.474464	0.323797	9	94	1	12662	SUFU
GO:BP	ventral spinal cord interneuron fate commitment	GO:0060579	0.474464	0.323797	9	94	1	12662	SUFU
GO:BP	glycolipid catabolic process	GO:0019377	0.474464	0.323797	9	94	1	12662	LOC100231740
GO:BP	regulation of growth	GO:0040008	0.474464	0.323797	290	94	5	12662	ADRB1,KAZALD1,NANOS1,SESN2,TLL2
GO:BP	adherens junction assembly	GO:0034333	0.474464	0.323797	9	94	1	12662	DLG5
GO:BP	response to acidic pH	GO:0010447	0.484859	0.314385	10	94	1	12662	PKD2L1
GO:BP	cellular response to arsenic-containing substance	GO:0071243	0.484859	0.314385	10	94	1	12662	PPIF
GO:BP	heat generation	GO:0031649	0.484859	0.314385	10	94	1	12662	ADRB1
GO:BP	ribosome biogenesis	GO:0042254	0.484859	0.314385	127	94	3	12662	BMS1,EXOSC3,PDCD11
GO:BP	phosphatidylcholine catabolic process	GO:0034638	0.484859	0.314385	10	94	1	12662	LOC100231740
GO:BP	determination of adult lifespan	GO:0008340	0.484859	0.314385	10	94	1	12662	IDE
GO:BP	AMP metabolic process	GO:0046033	0.484859	0.314385	10	94	1	12662	ADK
GO:BP	regulation of generation of precursor metabolites and energy	GO:0043467	0.484859	0.314385	57	94	2	12662	IDE,PPIF
GO:BP	mitotic centrosome separation	GO:0007100	0.484859	0.314385	10	94	1	12662	KIF11
GO:BP	centrosome separation	GO:0051299	0.484859	0.314385	10	94	1	12662	KIF11
GO:BP	generation of precursor metabolites and energy	GO:0006091	0.484859	0.314385	206	94	4	12662	ENO4,IDE,OGDHL,PPIF
GO:BP	negative regulation of DNA metabolic process	GO:0051053	0.484859	0.314385	58	94	2	12662	SHLD2,STN1
GO:BP	detection of chemical stimulus involved in sensory perception	GO:0050907	0.484859	0.314385	10	94	1	12662	PKD2L1
GO:BP	purine-containing compound salvage	GO:0043101	0.484859	0.314385	10	94	1	12662	ADK
GO:BP	cell volume homeostasis	GO:0006884	0.484859	0.314385	10	94	1	12662	KCNMA1
GO:BP	positive regulation of heart rate	GO:0010460	0.484859	0.314385	10	94	1	12662	ADRB1
GO:BP	negative regulation of hippo signaling	GO:0035331	0.495662	0.304814	11	94	1	12662	DLG5
GO:BP	negative regulation of TORC1 signaling	GO:1904262	0.495662	0.304814	11	94	1	12662	SESN2
GO:BP	energy derivation by oxidation of organic compounds	GO:0015980	0.495662	0.304814	133	94	3	12662	IDE,OGDHL,PPIF
GO:BP	detection of temperature stimulus	GO:0016048	0.495662	0.304814	11	94	1	12662	OPN4
GO:BP	negative regulation of telomere maintenance via telomerase	GO:0032211	0.495662	0.304814	11	94	1	12662	STN1
GO:BP	ectodermal placode formation	GO:0060788	0.495662	0.304814	11	94	1	12662	NRG3
GO:BP	sensory perception of temperature stimulus	GO:0050951	0.495662	0.304814	11	94	1	12662	OPN4
GO:BP	ectodermal placode development	GO:0071696	0.495662	0.304814	11	94	1	12662	NRG3
GO:BP	ectodermal placode morphogenesis	GO:0071697	0.495662	0.304814	11	94	1	12662	NRG3
GO:BP	collecting duct development	GO:0072044	0.495662	0.304814	11	94	1	12662	DLG5
GO:BP	heme biosynthetic process	GO:0006783	0.495662	0.304814	11	94	1	12662	LOC100232471
GO:BP	cytoplasmic sequestering of protein	GO:0051220	0.495662	0.304814	11	94	1	12662	SUFU
GO:BP	ventral spinal cord interneuron differentiation	GO:0021514	0.495662	0.304814	11	94	1	12662	SUFU
GO:BP	positive regulation of blood pressure	GO:0045777	0.495662	0.304814	11	94	1	12662	ADRB1
GO:BP	cellular response to estrogen stimulus	GO:0071391	0.495662	0.304814	11	94	1	12662	SFR1
GO:MF	signaling adaptor activity	GO:0035591	0.495699	0.304782	33	94	1	12662	BLNK
GO:BP	determination of left/right symmetry	GO:0007368	0.49887	0.302012	63	94	2	12662	BICC1,SUFU
GO:BP	protein localization to cell-cell junction	GO:0150105	0.504251	0.297353	12	94	1	12662	DLG5
GO:BP	determination of bilateral symmetry	GO:0009855	0.504251	0.297353	66	94	2	12662	BICC1,SUFU
GO:BP	regulation of DNA repair	GO:0006282	0.504251	0.297353	65	94	2	12662	MMS19,SHLD2
GO:BP	nucleotide salvage	GO:0043173	0.504251	0.297353	12	94	1	12662	ADK
GO:BP	adrenergic receptor signaling pathway	GO:0071875	0.504251	0.297353	12	94	1	12662	ADRB1
GO:BP	response to toxic substance	GO:0009636	0.504251	0.297353	66	94	2	12662	EXOSC3,SESN2
GO:BP	regulation of cAMP-dependent protein kinase activity	GO:2000479	0.504251	0.297353	12	94	1	12662	SESN2
GO:BP	negative regulation of double-strand break repair via homologous recombination	GO:2000042	0.504251	0.297353	12	94	1	12662	SHLD2
GO:BP	triglyceride catabolic process	GO:0019433	0.504251	0.297353	12	94	1	12662	LOC100231740
GO:BP	potassium ion homeostasis	GO:0055075	0.504251	0.297353	12	94	1	12662	KCNMA1
GO:BP	purine ribonucleoside metabolic process	GO:0046128	0.504251	0.297353	12	94	1	12662	ADK
GO:BP	response to ischemia	GO:0002931	0.504251	0.297353	12	94	1	12662	PPIF
GO:BP	protein-chromophore linkage	GO:0018298	0.504251	0.297353	12	94	1	12662	OPN4
GO:BP	response to arsenic-containing substance	GO:0046685	0.504251	0.297353	12	94	1	12662	PPIF
GO:BP	regulation of double-strand break repair via nonhomologous end joining	GO:2001032	0.504251	0.297353	12	94	1	12662	SHLD2
GO:BP	positive regulation of transcription from RNA polymerase II promoter in response to stress	GO:0036003	0.504251	0.297353	12	94	1	12662	SESN2
KEGG	Base excision repair	KEGG:03410	0.508974	0.293304	22	94	1	12662	POLL
GO:BP	specification of symmetry	GO:0009799	0.515194	0.288029	67	94	2	12662	BICC1,SUFU
GO:BP	porphyrin-containing compound biosynthetic process	GO:0006779	0.516667	0.286789	13	94	1	12662	LOC100232471
GO:BP	regulation of ARF protein signal transduction	GO:0032012	0.516667	0.286789	13	94	1	12662	PSD
GO:BP	positive regulation of transcription from RNA polymerase II promoter involved in cellular response to chemical stimulus	GO:1901522	0.516667	0.286789	13	94	1	12662	SESN2
GO:BP	ARF protein signal transduction	GO:0032011	0.516667	0.286789	13	94	1	12662	PSD
GO:BP	detection of visible light	GO:0009584	0.516667	0.286789	13	94	1	12662	OPN4
GO:BP	purine nucleoside metabolic process	GO:0042278	0.516667	0.286789	13	94	1	12662	ADK
GO:BP	chondroitin sulfate proteoglycan biosynthetic process	GO:0050650	0.516667	0.286789	13	94	1	12662	CSGALNACT2
GO:BP	glycerophospholipid catabolic process	GO:0046475	0.516667	0.286789	13	94	1	12662	LOC100231740
GO:BP	negative regulation of blood pressure	GO:0045776	0.516667	0.286789	13	94	1	12662	ADRB1
GO:BP	cellular response to pH	GO:0071467	0.516667	0.286789	13	94	1	12662	PKD2L1
GO:MF	microtubule motor activity	GO:0003777	0.523255	0.281286	36	94	1	12662	KIF11
GO:MF	ATP-dependent microtubule motor activity	GO:1990939	0.523255	0.281286	36	94	1	12662	KIF11
GO:MF	lyase activity	GO:0016829	0.523255	0.281286	125	94	2	12662	ENO4,POLL
GO:MF	phosphoprotein phosphatase activity	GO:0004721	0.523255	0.281286	125	94	2	12662	LOC100232794,LOC105759360
KEGG	Cytosolic DNA-sensing pathway	KEGG:04623	0.524512	0.280245	25	94	1	12662	POLR3A
GO:BP	negative regulation of ATP metabolic process	GO:1903579	0.529101	0.276462	14	94	1	12662	PPIF
GO:BP	tricarboxylic acid cycle	GO:0006099	0.529101	0.276462	14	94	1	12662	OGDHL
GO:BP	tetrapyrrole biosynthetic process	GO:0033014	0.529101	0.276462	14	94	1	12662	LOC100232471
GO:BP	spinal cord dorsal/ventral patterning	GO:0021513	0.529101	0.276462	14	94	1	12662	SUFU
GO:BP	response to dietary excess	GO:0002021	0.529101	0.276462	14	94	1	12662	ADRB1
GO:BP	regulation of the force of heart contraction	GO:0002026	0.529101	0.276462	14	94	1	12662	ADRB1
GO:BP	vesicle docking involved in exocytosis	GO:0006904	0.529101	0.276462	14	94	1	12662	EXOC6
GO:BP	regulation of hippo signaling	GO:0035330	0.529101	0.276462	14	94	1	12662	DLG5
GO:BP	positive regulation of mitochondrial membrane permeability	GO:0035794	0.529101	0.276462	14	94	1	12662	PPIF
GO:BP	mitochondrial outer membrane permeabilization involved in programmed cell death	GO:1902686	0.529101	0.276462	14	94	1	12662	PPIF
GO:BP	phototransduction	GO:0007602	0.529101	0.276462	14	94	1	12662	OPN4
GO:BP	response to temperature stimulus	GO:0009266	0.529101	0.276462	71	94	2	12662	ADRB1,OPN4
GO:MF	endopeptidase activity	GO:0004175	0.531497	0.274499	232	94	3	12662	IDE,LOC100229828,TLL2
GO:MF	metalloexopeptidase activity	GO:0008235	0.531497	0.274499	38	94	1	12662	XPNPEP1
GO:MF	amide binding	GO:0033218	0.531497	0.274499	129	94	2	12662	IDE,PPIF
GO:MF	actin binding	GO:0003779	0.531497	0.274499	232	94	3	12662	ABLIM1,KCNMA1,NRAP
GO:MF	manganese ion binding	GO:0030145	0.532288	0.273853	39	94	1	12662	XPNPEP1
GO:MF	PDZ domain binding	GO:0030165	0.532288	0.273853	39	94	1	12662	ADRB1
GO:MF	hydro-lyase activity	GO:0016836	0.536305	0.270588	40	94	1	12662	ENO4
GO:MF	postsynaptic neurotransmitter receptor activity	GO:0098960	0.536305	0.270588	40	94	1	12662	ADRB1
GO:CC	Seh1-associated complex	GO:0035859	0.537018	0.270011	13	94	1	12662	SESN2
GO:MF	oxidoreductase activity, acting on the CH-CH group of donors	GO:0016627	0.540125	0.267506	41	94	1	12662	LOC100232471
GO:MF	cargo receptor activity	GO:0038024	0.540125	0.267506	41	94	1	12662	LOC100229828
GO:MF	phospholipid binding	GO:0005543	0.540593	0.267129	241	94	3	12662	ANXA11,MYOF,PSD
GO:BP	positive regulation of heart contraction	GO:0045823	0.540702	0.267042	16	94	1	12662	ADRB1
GO:BP	positive regulation of isotype switching	GO:0045830	0.540702	0.267042	16	94	1	12662	SHLD2
GO:BP	dorsal/ventral neural tube patterning	GO:0021904	0.540702	0.267042	16	94	1	12662	SUFU
GO:BP	purine ribonucleoside monophosphate biosynthetic process	GO:0009168	0.540702	0.267042	16	94	1	12662	ADK
GO:BP	vasodilation	GO:0042311	0.540702	0.267042	16	94	1	12662	ADRB1
GO:BP	positive regulation of dendritic spine development	GO:0060999	0.540702	0.267042	16	94	1	12662	DLG5
GO:BP	acylglycerol homeostasis	GO:0055090	0.540702	0.267042	16	94	1	12662	SESN2
GO:BP	positive regulation of blood circulation	GO:1903524	0.540702	0.267042	16	94	1	12662	ADRB1
GO:BP	polarized epithelial cell differentiation	GO:0030859	0.540702	0.267042	16	94	1	12662	DLG5
GO:BP	metallo-sulfur cluster assembly	GO:0031163	0.540702	0.267042	16	94	1	12662	MMS19
GO:BP	proton transmembrane transport	GO:1902600	0.540702	0.267042	75	94	2	12662	LOC100190507,PPIF
GO:BP	triglyceride homeostasis	GO:0070328	0.540702	0.267042	16	94	1	12662	SESN2
GO:BP	regulation of cell growth	GO:0001558	0.540702	0.267042	157	94	3	12662	KAZALD1,NANOS1,SESN2
GO:BP	heme metabolic process	GO:0042168	0.540702	0.267042	15	94	1	12662	LOC100232471
GO:BP	amyloid-beta clearance	GO:0097242	0.540702	0.267042	16	94	1	12662	IDE
GO:BP	negative regulation of telomere maintenance via telomere lengthening	GO:1904357	0.540702	0.267042	15	94	1	12662	STN1
GO:BP	spinal cord patterning	GO:0021511	0.540702	0.267042	15	94	1	12662	SUFU
GO:BP	positive regulation of membrane permeability	GO:1905710	0.540702	0.267042	16	94	1	12662	PPIF
GO:BP	regulation of necrotic cell death	GO:0010939	0.540702	0.267042	15	94	1	12662	PPIF
GO:BP	negative chemotaxis	GO:0050919	0.540702	0.267042	16	94	1	12662	NRG3
GO:BP	iron-sulfur cluster assembly	GO:0016226	0.540702	0.267042	16	94	1	12662	MMS19
GO:BP	L-glutamate transmembrane transport	GO:0015813	0.540702	0.267042	15	94	1	12662	SLC25A22
GO:BP	positive regulation of B cell mediated immunity	GO:0002714	0.540702	0.267042	16	94	1	12662	SHLD2
GO:BP	circadian behavior	GO:0048512	0.540702	0.267042	16	94	1	12662	ADRB1
GO:BP	synaptic vesicle transport	GO:0048489	0.540702	0.267042	16	94	1	12662	AP3M1
GO:BP	purine nucleoside monophosphate biosynthetic process	GO:0009127	0.540702	0.267042	16	94	1	12662	ADK
GO:BP	myoblast fusion	GO:0007520	0.540702	0.267042	16	94	1	12662	MYOF
GO:BP	lymphocyte chemotaxis	GO:0048247	0.540702	0.267042	15	94	1	12662	CH25H
GO:BP	positive regulation of immunoglobulin mediated immune response	GO:0002891	0.540702	0.267042	16	94	1	12662	SHLD2
HP	Odontogenic keratocysts of the jaw	HP:0010603	0.545289	0.263374	3	94	1	12662	SUFU
HP	Fibroma	HP:0010614	0.545289	0.263374	55	94	2	12662	FAS,SUFU
HP	Palmar pits	HP:0010610	0.545289	0.263374	5	94	1	12662	SUFU
HP	Plantar pits	HP:0010612	0.545289	0.263374	4	94	1	12662	SUFU
HP	Intracranial cystic lesion	HP:0010576	0.545289	0.263374	139	94	4	12662	EXOSC3,POLR3A,SUFU,TUBGCP2
HP	Abnormal serum testosterone level	HP:0030087	0.545289	0.263374	54	94	2	12662	POLR3A,SUFU
HP	Burkitt lymphoma	HP:0030080	0.545289	0.263374	9	94	1	12662	FAS
HP	Hamartoma	HP:0010566	0.545289	0.263374	57	94	2	12662	FAM149B1,SUFU
HP	Lagopthalmos	HP:0030001	0.545289	0.263374	4	94	1	12662	POLR3A
HP	Increased serum testosterone level	HP:0030088	0.545289	0.263374	7	94	1	12662	POLR3A
HP	Midline notch of upper alveolar ridge	HP:0009084	0.545289	0.263374	5	94	1	12662	FAM149B1
HP	Transient global amnesia	HP:0010534	0.545289	0.263374	13	94	1	12662	SUFU
HP	Ovarian fibroma	HP:0010618	0.545289	0.263374	3	94	1	12662	SUFU
HP	Fibroadenoma of the breast	HP:0010619	0.545289	0.263374	8	94	1	12662	FAS
HP	Abnormality of the nasal cavity	HP:0010640	0.545289	0.263374	12	94	1	12662	SUFU
HP	Abnormality of the midnasal cavity	HP:0010641	0.545289	0.263374	11	94	1	12662	SUFU
HP	Midnasal stenosis	HP:0010644	0.545289	0.263374	11	94	1	12662	SUFU
HP	Dermal translucency	HP:0010648	0.545289	0.263374	14	94	1	12662	POLR3A
HP	Congenital generalized lipodystrophy	HP:0009059	0.545289	0.263374	2	94	1	12662	POLR3A
HP	High myoinositol in brain by MRS	HP:0025460	0.545289	0.263374	2	94	1	12662	POLR3A
HP	Abnormality of the falx cerebri	HP:0010653	0.545289	0.263374	16	94	1	12662	SUFU
HP	Hemifacial spasm	HP:0010828	0.545289	0.263374	12	94	1	12662	SUFU
HP	Multifocal epileptiform discharges	HP:0010841	0.545289	0.263374	67	94	2	12662	KCNMA1,SLC25A22
HP	Decreased circulating luteinizing hormone level	HP:0030344	0.545289	0.263374	13	94	1	12662	SUFU
HP	Cardiac fibroma	HP:0010617	0.545289	0.263374	3	94	1	12662	SUFU
HP	Hyperpituitarism	HP:0010514	0.545289	0.263374	73	94	3	12662	NANOS1,POLR3A,SUFU
HP	Short 4th metacarpal	HP:0010044	0.545289	0.263374	12	94	1	12662	SUFU
HP	Subcortical heterotopia	HP:0032391	0.545289	0.263374	10	94	1	12662	TUBGCP2
HP	Weakness of long finger extensor muscles	HP:0009077	0.545289	0.263374	14	94	1	12662	LDB3
HP	Abnormal adipose tissue morphology	HP:0009124	0.545289	0.263374	148	94	4	12662	FAS,KIF11,LDB3,POLR3A
HP	Increased adipose tissue	HP:0009126	0.545289	0.263374	6	94	1	12662	POLR3A
HP	Progressive proximal muscle weakness	HP:0009073	0.545289	0.263374	13	94	1	12662	LDB3
HP	Webbed penis	HP:0030264	0.545289	0.263374	3	94	1	12662	POLR3A
HP	Aplasia/Hypoplasia of the distal phalanx of the thumb	HP:0009641	0.545289	0.263374	9	94	1	12662	SUFU
HP	Short distal phalanx of the thumb	HP:0009650	0.545289	0.263374	9	94	1	12662	SUFU
HP	Abnormality of muscle size	HP:0030236	0.545289	0.263374	477	94	7	12662	ADK,ANXA11,ENTPD1,EXOSC3,KCNMA1,LDB3,POLR3A
HP	Cardiac rhabdomyoma	HP:0009729	0.545289	0.263374	7	94	1	12662	SUFU
HP	Abnormal circulating gonadotropin level	HP:0030338	0.545289	0.263374	64	94	2	12662	NANOS1,SUFU
HP	Decreased circulating gonadotropin level	HP:0030339	0.545289	0.263374	15	94	1	12662	SUFU
HP	Rhabdomyoma	HP:0009730	0.545289	0.263374	7	94	1	12662	SUFU
HP	Cerebral hamartoma	HP:0009731	0.545289	0.263374	11	94	1	12662	FAM149B1
HP	Decreased Achilles reflex	HP:0009072	0.545289	0.263374	6	94	1	12662	LDB3
HP	Lower limb undergrowth	HP:0009816	0.545289	0.263374	7	94	1	12662	PAPSS2
HP	Decreased circulating follicle stimulating hormone level	HP:0030341	0.545289	0.263374	13	94	1	12662	SUFU
HP	Pulmonary cyst	HP:0032445	0.545289	0.263374	16	94	1	12662	STN1
HP	Cyclopia	HP:0009914	0.545289	0.263374	15	94	1	12662	SUFU
HP	Abnormality of the 4th metacarpal	HP:0010012	0.545289	0.263374	15	94	1	12662	SUFU
HP	Aplasia/Hypoplasia of the 4th metacarpal	HP:0010042	0.545289	0.263374	12	94	1	12662	SUFU
HP	Abnormal renal echogenicity	HP:0033130	0.545289	0.263374	11	94	1	12662	BICC1
HP	Progressive distal muscle weakness	HP:0009063	0.545289	0.263374	7	94	1	12662	LDB3
HP	Fatigable weakness of distal limb muscles	HP:0030198	0.545289	0.263374	7	94	1	12662	LDB3
HP	Neuralgia	HP:0033345	0.545289	0.263374	14	94	1	12662	SUFU
HP	Wide penis	HP:0030265	0.545289	0.263374	2	94	1	12662	POLR3A
HP	Subcortical band heterotopia	HP:0032409	0.545289	0.263374	8	94	1	12662	TUBGCP2
HP	Neuroinflammation	HP:0033429	0.545289	0.263374	10	94	1	12662	FAS
HP	Chylothorax	HP:0010310	0.545289	0.263374	9	94	1	12662	KIF11
HP	Abnormal sperm tail morphology	HP:0012868	0.545289	0.263374	14	94	1	12662	NANOS1
HP	Abnormality of skin physiology	HP:0011122	0.545289	0.263374	295	94	5	12662	BLNK,FAS,KIF11,PAPSS2,POLR3A
HP	EEG with spike-wave complexes (>3.5 Hz)	HP:0010849	0.545289	0.263374	5	94	1	12662	KCNMA1
HP	Abnormal hypothalamus morphology	HP:0012286	0.545289	0.263374	12	94	1	12662	FAM149B1
HP	Decreased glomerular filtration rate	HP:0012213	0.545289	0.263374	9	94	1	12662	BICC1
HP	Melanonychia	HP:0100644	0.545289	0.263374	2	94	1	12662	KIF11
HP	Abnormal serum estradiol	HP:0025133	0.545289	0.263374	42	94	2	12662	POLR3A,SUFU
HP	Abnormal glomerular filtration rate	HP:0012212	0.545289	0.263374	9	94	1	12662	BICC1
HP	Globozoospermia	HP:0012205	0.545289	0.263374	2	94	1	12662	NANOS1
HP	B-cell lymphoma	HP:0012191	0.545289	0.263374	14	94	1	12662	FAS
HP	Fibrous tissue neoplasm	HP:0012316	0.545289	0.263374	57	94	2	12662	FAS,SUFU
HP	Increased serum estradiol	HP:0025134	0.545289	0.263374	1	94	1	12662	POLR3A
HP	Hepatitis	HP:0012115	0.545289	0.263374	59	94	2	12662	BLNK,FAS
HP	Obstructive azoospermia	HP:0011962	0.545289	0.263374	13	94	1	12662	NANOS1
HP	Honeycomb lung	HP:0025175	0.545289	0.263374	11	94	1	12662	STN1
HP	Submucous cleft soft palate	HP:0011819	0.545289	0.263374	8	94	1	12662	POLR3A
HP	Decreased patellar reflex	HP:0011808	0.545289	0.263374	3	94	1	12662	LDB3
HP	Hamartoma of tongue	HP:0011802	0.545289	0.263374	14	94	1	12662	FAM149B1
HP	Pituitary growth hormone cell adenoma	HP:0011760	0.545289	0.263374	7	94	1	12662	BICC1
HP	T-cell lymphoma	HP:0012190	0.545289	0.263374	10	94	1	12662	FAS
HP	Abnormality of nail color	HP:0100643	0.545289	0.263374	14	94	1	12662	KIF11
HP	Pyelonephritis	HP:0012330	0.545289	0.263374	8	94	1	12662	BICC1
HP	Premature pubarche	HP:0012411	0.545289	0.263374	8	94	1	12662	PAPSS2
HP	Abnormal sperm head morphology	HP:0012865	0.545289	0.263374	10	94	1	12662	NANOS1
HP	Wide nasal ridge	HP:0012811	0.545289	0.263374	7	94	1	12662	POLR3A
HP	Abnormal neuron morphology	HP:0012757	0.545289	0.263374	59	94	2	12662	ANXA11,POLR3A
HP	Focal T2 hypointense thalamic lesion	HP:0012691	0.545289	0.263374	11	94	1	12662	SUFU
HP	Abnormality of intracranial pressure	HP:0012640	0.545289	0.263374	60	94	2	12662	FAS,SUFU
HP	Albuminuria	HP:0012592	0.545289	0.263374	11	94	1	12662	BICC1
HP	Absent thumbnail	HP:0012554	0.545289	0.263374	16	94	1	12662	SLC25A22
HP	Enlarged pituitary gland	HP:0012505	0.545289	0.263374	13	94	1	12662	SUFU
HP	Endocarditis	HP:0100584	0.545289	0.263374	15	94	1	12662	FAS
HP	Lipoatrophy	HP:0100578	0.545289	0.263374	58	94	2	12662	LDB3,POLR3A
HP	Odontogenic neoplasm	HP:0100612	0.545289	0.263374	7	94	1	12662	SUFU
HP	Abnormality of the pituitary gland	HP:0012503	0.545289	0.263374	231	94	4	12662	BICC1,NANOS1,POLR3A,SUFU
HP	Neoplasm of the endocrine system	HP:0100568	0.545289	0.263374	96	94	3	12662	BICC1,FAS,SUFU
HP	Panniculitis	HP:0012490	0.545289	0.263374	17	94	2	12662	FAS,KIF11
HP	Neoplasm of the heart	HP:0100544	0.545289	0.263374	11	94	1	12662	SUFU
HP	Tongue atrophy	HP:0012473	0.545289	0.263374	9	94	1	12662	EXOSC3
HP	Abnormal circulating estrogen level	HP:0025132	0.545289	0.263374	42	94	2	12662	POLR3A,SUFU
HP	Mesoaxial polydactyly	HP:0100260	0.545289	0.263374	12	94	1	12662	FAM149B1
HP	Neoplasm of the posterior pituitary	HP:0011752	0.545289	0.263374	11	94	1	12662	SUFU
HP	Neoplasm of the anterior pituitary	HP:0011750	0.545289	0.263374	40	94	2	12662	BICC1,SUFU
HP	Ground-glass opacification on pulmonary HRCT	HP:0025179	0.545289	0.263374	15	94	1	12662	STN1
HP	Optic neuritis	HP:0100653	0.545289	0.263374	10	94	1	12662	FAS
HP	Retrobulbar optic neuritis	HP:0100654	0.545289	0.263374	8	94	1	12662	FAS
HP	Myoclonic absence seizure	HP:0011150	0.545289	0.263374	10	94	1	12662	KCNMA1
HP	Increased sensitivity to ionizing radiation	HP:0011133	0.545289	0.263374	13	94	1	12662	SUFU
HP	Cellulitis	HP:0100658	0.545289	0.263374	33	94	2	12662	BLNK,KIF11
HP	Trigeminal neuralgia	HP:0100661	0.545289	0.263374	14	94	1	12662	SUFU
HP	Abnormal renal calyx morphology	HP:0011130	0.545289	0.263374	3	94	1	12662	POLR3A
HP	Inflammatory abnormality of the skin	HP:0011123	0.545289	0.263374	254	94	5	12662	BLNK,FAS,KIF11,PAPSS2,POLR3A
HP	Reticular pattern on pulmonary HRCT	HP:0025390	0.545289	0.263374	11	94	1	12662	STN1
HP	Abnormal spaced incisors	HP:0040159	0.545289	0.263374	8	94	1	12662	TUBGCP2
HP	Dilatation of renal calices	HP:0100581	0.545289	0.263374	3	94	1	12662	POLR3A
HP	Abnormality of serum cytokine level	HP:0011112	0.545289	0.263374	16	94	1	12662	FAS
HP	Abnormality of immune serum protein physiology	HP:0011111	0.545289	0.263374	16	94	1	12662	FAS
HP	Misalignment of incisors	HP:0011062	0.545289	0.263374	8	94	1	12662	TUBGCP2
HP	Chromosomal breakage induced by ionizing radiation	HP:0010997	0.545289	0.263374	13	94	1	12662	SUFU
HP	Abnormal circulating methionine concentration	HP:0010901	0.545289	0.263374	14	94	1	12662	ADK
HP	EEG with spike-wave complexes	HP:0010850	0.545289	0.263374	62	94	2	12662	KCNMA1,SLC25A22
HP	Focal myoclonic seizure	HP:0011166	0.545289	0.263374	13	94	1	12662	SLC25A22
HP	Abnormal spleen physiology	HP:0025409	0.545289	0.263374	14	94	1	12662	FAS
HP	Focal tonic seizure	HP:0011167	0.545289	0.263374	10	94	1	12662	SLC25A22
HP	Neoplasm of the pituitary gland	HP:0040277	0.545289	0.263374	40	94	2	12662	BICC1,SUFU
HP	Abnormality of the anterior pituitary	HP:0011747	0.545289	0.263374	211	94	4	12662	BICC1,NANOS1,POLR3A,SUFU
HP	Abnormal central sensory function	HP:0011730	0.545289	0.263374	12	94	1	12662	SUFU
HP	Spinal meningioma	HP:0100010	0.545289	0.263374	11	94	1	12662	SUFU
HP	Unusual CNS infection	HP:0011450	0.545289	0.263374	55	94	2	12662	BLNK,FAS
HP	Ovarian carcinoma	HP:0025318	0.545289	0.263374	10	94	1	12662	SUFU
HP	Intracranial meningioma	HP:0100009	0.545289	0.263374	11	94	1	12662	SUFU
HP	Red eye	HP:0025337	0.545289	0.263374	71	94	2	12662	BLNK,FAS
HP	Abnormal cervical spine morphology	HP:0046508	0.545289	0.263374	14	94	1	12662	POLR3A
HP	Caesarian section	HP:0011410	0.545289	0.263374	5	94	1	12662	POLR3A
HP	Weakness of the intrinsic hand muscles	HP:0009005	0.545289	0.263374	16	94	1	12662	LDB3
HP	Neoplasm of the tongue	HP:0100648	0.545289	0.263374	31	94	3	12662	FAM149B1,FAS,SUFU
HP	Patchy hypopigmentation of hair	HP:0011365	0.545289	0.263374	16	94	1	12662	FAS
HP	Abnormality of upper lip vermillion	HP:0011339	0.545289	0.263374	284	94	5	12662	KCNMA1,KIF11,POLR3A,SUFU,TUBGCP2
HP	Broad eyebrow	HP:0011229	0.545289	0.263374	15	94	1	12662	POLR3A
HP	Abnormal shape of the occiput	HP:0011217	0.545289	0.263374	75	94	2	12662	KIF11,SUFU
HP	Uni- and bilateral multifocal epileptiform discharges	HP:0011190	0.545289	0.263374	15	94	1	12662	SLC25A22
HP	Neoplasm of the oral cavity	HP:0100649	0.545289	0.263374	43	94	3	12662	FAM149B1,FAS,SUFU
HP	Eyelid myoclonias	HP:0011168	0.545289	0.263374	3	94	1	12662	SLC25A22
HP	Increased subcutaneous truncal adipose tissue	HP:0009003	0.545289	0.263374	1	94	1	12662	POLR3A
HP	Meningitis	HP:0001287	0.545289	0.263374	45	94	2	12662	BLNK,FAS
HP	Unusual infection by anatomical site	HP:0032158	0.545289	0.263374	57	94	2	12662	BLNK,FAS
HP	Molar tooth sign on MRI	HP:0002419	0.545289	0.263374	28	94	2	12662	FAM149B1,SUFU
HP	Increased circulating androgen level	HP:0030348	0.545289	0.263374	7	94	1	12662	POLR3A
HP	Abnormality of midbrain morphology	HP:0002418	0.545289	0.263374	55	94	2	12662	FAM149B1,SUFU
HP	Subependymal cysts	HP:0002416	0.545289	0.263374	6	94	1	12662	TUBGCP2
HP	Positive Romberg sign	HP:0002403	0.545289	0.263374	13	94	1	12662	POLR3A
HP	Cerebellar cyst	HP:0002350	0.545289	0.263374	114	94	3	12662	EXOSC3,POLR3A,SUFU
HP	Poliosis	HP:0002290	0.545289	0.263374	2	94	1	12662	FAS
HP	Abnormality of neuronal migration	HP:0002269	0.545289	0.263374	375	94	6	12662	FAM149B1,KIF11,POLR3A,SLC25A22,SUFU,TUBGCP2
HP	Facial hypertrichosis	HP:0002219	0.545289	0.263374	121	94	3	12662	KCNMA1,POLR3A,TUBGCP2
HP	Premature graying of hair	HP:0002216	0.545289	0.263374	29	94	2	12662	FAS,STN1
HP	Sparse scalp hair	HP:0002209	0.545289	0.263374	73	94	2	12662	FAS,POLR3A
HP	Pulmonary fibrosis	HP:0002206	0.545289	0.263374	50	94	2	12662	FAS,STN1
HP	Pleural effusion	HP:0002202	0.545289	0.263374	41	94	2	12662	FAS,KIF11
HP	Abnormal upper motor neuron morphology	HP:0002127	0.545289	0.263374	15	94	1	12662	POLR3A
HP	Abnormal pleura morphology	HP:0002103	0.545289	0.263374	55	94	2	12662	FAS,KIF11
HP	Long penis	HP:0000040	0.545289	0.263374	6	94	1	12662	POLR3A
HP	Abnormality of reproductive system physiology	HP:0000080	0.545289	0.263374	526	94	7	12662	BICC1,FAS,NANOS1,PAPSS2,POLR3A,RBP3,SUFU
HP	Renal dysplasia	HP:0000110	0.545289	0.263374	56	94	2	12662	BICC1,SLC25A22
HP	Nephritis	HP:0000123	0.545289	0.263374	44	94	2	12662	BICC1,FAS
HP	Abnormality of the tongue	HP:0000157	0.545289	0.263374	255	94	5	12662	EXOSC3,FAM149B1,FAS,KCNMA1,SUFU
HP	Lobulated tongue	HP:0000180	0.545289	0.263374	10	94	1	12662	FAM149B1
HP	Hypothalamic hamartoma	HP:0002444	0.545289	0.263374	8	94	1	12662	FAM149B1
HP	Tongue nodules	HP:0000199	0.545289	0.263374	7	94	1	12662	FAM149B1
HP	Abnormal motor neuron morphology	HP:0002450	0.545289	0.263374	55	94	2	12662	ANXA11,POLR3A
HP	Brain stem compression	HP:0002512	0.545289	0.263374	14	94	1	12662	SUFU
HP	Visual acuity test abnormality	HP:0030532	0.545289	0.263374	16	94	1	12662	SUFU
HP	Reduced delayed hypersensitivity	HP:0002972	0.545289	0.263374	4	94	1	12662	FAS
HP	Bitemporal hemianopia	HP:0030521	0.545289	0.263374	14	94	1	12662	SUFU
HP	Abnormal delayed hypersensitivity skin test	HP:0002963	0.545289	0.263374	9	94	1	12662	FAS
HP	Rheumatoid factor positive	HP:0002923	0.545289	0.263374	12	94	1	12662	FAS
HP	Medulloblastoma	HP:0002885	0.545289	0.263374	14	94	1	12662	SUFU
HP	Heteronymous hemianopia	HP:0030517	0.545289	0.263374	14	94	1	12662	SUFU
HP	Increased proportion of HLA DR+ T cells	HP:0002853	0.545289	0.263374	3	94	1	12662	FAS
HP	Elevated proportion of CD4-negative, CD8-negative, alpha-beta regulatory T cells	HP:0002851	0.545289	0.263374	5	94	1	12662	FAS
HP	Decreased specific anti-polysaccharide antibody level	HP:0002848	0.545289	0.263374	8	94	1	12662	FAS
HP	Kyphoscoliosis	HP:0002751	0.545289	0.263374	137	94	3	12662	PAPSS2,POLR3A,SUFU
HP	Decreased lymphocyte apoptosis	HP:0002731	0.545289	0.263374	6	94	1	12662	FAS
HP	Chronic noninfectious lymphadenopathy	HP:0002730	0.545289	0.263374	9	94	1	12662	FAS
HP	Follicular hyperplasia	HP:0002729	0.545289	0.263374	10	94	1	12662	FAS
HP	Abnormal parietal bone morphology	HP:0002696	0.545289	0.263374	23	94	2	12662	POLR3A,SUFU
HP	Deformed sella turcica	HP:0002681	0.545289	0.263374	14	94	1	12662	SUFU
HP	Basal cell carcinoma	HP:0002671	0.545289	0.263374	44	94	2	12662	FAS,SUFU
HP	Lymphoma	HP:0002665	0.545289	0.263374	75	94	2	12662	FAS,KIF11
HP	Spondyloepimetaphyseal dysplasia	HP:0002651	0.545289	0.263374	12	94	1	12662	PAPSS2
HP	Abnormal cortical gyration	HP:0002536	0.545289	0.263374	309	94	5	12662	KIF11,POLR3A,SLC25A22,SUFU,TUBGCP2
HP	Increased intracranial pressure	HP:0002516	0.545289	0.263374	60	94	2	12662	FAS,SUFU
HP	Upper motor neuron dysfunction	HP:0002493	0.545289	0.263374	943	94	11	12662	ANXA11,ENTPD1,EXOSC3,FAS,KIF11,LOC100232471,POLR3A,SLC25A22,STN1,SUFU,TUBGCP2
HP	Abnormal visual field test	HP:0030588	0.545289	0.263374	13	94	1	12662	SUFU
HP	Pleuritis	HP:0002102	0.545289	0.263374	11	94	1	12662	FAS
HP	Thin upper lip vermilion	HP:0000219	0.545289	0.263374	200	94	4	12662	KCNMA1,KIF11,POLR3A,TUBGCP2
HP	Emotional lability	HP:0000712	0.545289	0.263374	92	94	3	12662	ANXA11,LOC100232471,SUFU
HP	Abnormality of the larynx	HP:0001600	0.545289	0.263374	131	94	3	12662	ANXA11,KCNMA1,POLR3A
HP	Agitation	HP:0000713	0.545289	0.263374	77	94	2	12662	ANXA11,KIF11
HP	Cystic renal dysplasia	HP:0000800	0.545289	0.263374	7	94	1	12662	BICC1
HP	Thyroid adenoma	HP:0000854	0.545289	0.263374	11	94	1	12662	FAS
HP	Increased circulating prolactin concentration	HP:0000870	0.545289	0.263374	18	94	2	12662	POLR3A,SUFU
HP	Bifid ribs	HP:0000892	0.545289	0.263374	9	94	1	12662	SUFU
HP	Hypertrichosis	HP:0000998	0.545289	0.263374	177	94	4	12662	KCNMA1,LOC100232471,POLR3A,TUBGCP2
HP	Prominent scalp veins	HP:0001043	0.545289	0.263374	3	94	1	12662	POLR3A
HP	Recurrent skin infections	HP:0001581	0.545289	0.263374	70	94	2	12662	BLNK,POLR3A
HP	Vitiligo	HP:0001045	0.545289	0.263374	15	94	1	12662	FAS
HP	Subcutaneous nodule	HP:0001482	0.545289	0.263374	61	94	2	12662	FAS,KIF11
HP	Hepatic cysts	HP:0001407	0.545289	0.263374	15	94	1	12662	BICC1
HP	Erysipelas	HP:0001055	0.545289	0.263374	8	94	1	12662	KIF11
HP	Milia	HP:0001056	0.545289	0.263374	12	94	1	12662	SUFU
HP	Acne	HP:0001061	0.545289	0.263374	41	94	2	12662	FAS,PAPSS2
HP	Hepatic steatosis	HP:0001397	0.545289	0.263374	92	94	3	12662	ADK,LOC100232471,POLR3A
HP	Neurofibromas	HP:0001067	0.545289	0.263374	14	94	1	12662	SUFU
HP	Orbital cyst	HP:0001144	0.545289	0.263374	5	94	1	12662	SUFU
HP	Spasticity	HP:0001257	0.545289	0.263374	651	94	9	12662	ANXA11,ENTPD1,EXOSC3,KIF11,LOC100232471,POLR3A,SLC25A22,STN1,TUBGCP2
HP	Hemiparesis	HP:0001269	0.545289	0.263374	54	94	2	12662	FAS,SUFU
HP	Diastema	HP:0000699	0.545289	0.263374	15	94	2	12662	KCNMA1,TUBGCP2
HP	Hypersplenism	HP:0001971	0.545289	0.263374	14	94	1	12662	FAS
HP	Abnormality of the incisor	HP:0000676	0.545289	0.263374	80	94	3	12662	KCNMA1,SUFU,TUBGCP2
HP	Laryngomalacia	HP:0001601	0.545289	0.263374	49	94	2	12662	KCNMA1,POLR3A
HP	Parietal bossing	HP:0000242	0.545289	0.263374	8	94	2	12662	POLR3A,SUFU
HP	Neutropenia in presence of anti-neutropil antibodies	HP:0001904	0.545289	0.263374	15	94	1	12662	FAS
HP	Progressive microcephaly	HP:0000253	0.545289	0.263374	68	94	3	12662	EXOSC3,SLC25A22,TUBGCP2
HP	Cranial asymmetry	HP:0000267	0.545289	0.263374	13	94	1	12662	POLR3A
HP	Broad face	HP:0000283	0.545289	0.263374	15	94	1	12662	SUFU
HP	Abnormality of facial adipose tissue	HP:0000291	0.545289	0.263374	8	94	1	12662	POLR3A
HP	Loss of facial adipose tissue	HP:0000292	0.545289	0.263374	7	94	1	12662	POLR3A
HP	Pointed chin	HP:0000307	0.545289	0.263374	66	94	2	12662	KIF11,POLR3A
HP	Sloping forehead	HP:0000340	0.545289	0.263374	137	94	4	12662	KIF11,SLC25A22,SUFU,TUBGCP2
HP	Absent earlobe	HP:0000387	0.545289	0.263374	13	94	1	12662	POLR3A
HP	Narrow nasal ridge	HP:0000418	0.545289	0.263374	11	94	1	12662	POLR3A
HP	Anteverted nares	HP:0000463	0.545289	0.263374	440	94	6	12662	FAM149B1,KIF11,POLR3A,RBP3,SLC25A22,SUFU
HP	Iron deficiency anemia	HP:0001891	0.545289	0.263374	16	94	1	12662	FAS
HP	Glaucoma	HP:0000501	0.545289	0.263374	243	94	4	12662	FAS,KIF11,RBP3,SUFU
HP	Conjunctivitis	HP:0000509	0.545289	0.263374	68	94	2	12662	BLNK,FAS
HP	Leukonychia	HP:0001820	0.545289	0.263374	12	94	1	12662	KIF11
HP	Retinal detachment	HP:0000541	0.545289	0.263374	71	94	2	12662	FAS,KIF11
HP	Blindness	HP:0000618	0.545289	0.263374	203	94	4	12662	FAS,KIF11,RBP3,SUFU
HP	Narrow foot	HP:0001786	0.545289	0.263374	3	94	1	12662	ADK
HP	Oculomotor apraxia	HP:0000657	0.545289	0.263374	76	94	2	12662	EXOSC3,SUFU
HP	Synophrys	HP:0000664	0.545289	0.263374	113	94	3	12662	KCNMA1,POLR3A,TUBGCP2
HP	Macrodontia of permanent maxillary central incisor	HP:0000675	0.545289	0.263374	8	94	1	12662	KCNMA1
HP	Short femur	HP:0003097	0.545289	0.263374	16	94	1	12662	POLR3A
HP	Abnormal kinetic perimetry test	HP:0030591	0.545289	0.263374	11	94	1	12662	SUFU
HP	Skeletal muscle atrophy	HP:0003202	0.545289	0.263374	374	94	6	12662	ADK,ANXA11,ENTPD1,EXOSC3,LDB3,POLR3A
HP	Congenital localized absence of skin	HP:0007383	0.545289	0.263374	4	94	1	12662	BMS1
HP	Focal-onset seizure	HP:0007359	0.545289	0.263374	215	94	4	12662	KCNMA1,POLR3A,SLC25A22,SUFU
HP	Pulmonary opacity	HP:0031457	0.545289	0.263374	15	94	1	12662	STN1
HP	Paroxysmal dyskinesia	HP:0007166	0.545289	0.263374	5	94	1	12662	KCNMA1
HP	Hypoplasia of olfactory tract	HP:0007036	0.545289	0.263374	6	94	1	12662	FAM149B1
HP	Intellectual disability, borderline	HP:0006889	0.545289	0.263374	10	94	2	12662	ENTPD1,KCNMA1
HP	Impaired distal proprioception	HP:0006858	0.545289	0.263374	6	94	1	12662	POLR3A
HP	Endocardial fibrosis	HP:0006685	0.545289	0.263374	4	94	1	12662	LDB3
HP	Portal fibrosis	HP:0006580	0.545289	0.263374	7	94	1	12662	ADK
HP	Lipid accumulation in hepatocytes	HP:0006561	0.545289	0.263374	94	94	3	12662	ADK,LOC100232471,POLR3A
HP	Polycystic liver disease	HP:0006557	0.545289	0.263374	5	94	1	12662	BICC1
HP	Progressive pulmonary function impairment	HP:0006520	0.545289	0.263374	13	94	1	12662	SUFU
HP	Thin long bone diaphyses	HP:0006470	0.545289	0.263374	1	94	1	12662	POLR3A
HP	Widely-spaced incisors	HP:0006304	0.545289	0.263374	7	94	1	12662	TUBGCP2
HP	Abnormal proportion of double-negative alpha-beta regulatory T cell	HP:0031399	0.545289	0.263374	5	94	1	12662	FAS
HP	Abnormal proportion of CD8-positive T cells	HP:0031393	0.545289	0.263374	12	94	1	12662	FAS
HP	Ankle weakness	HP:0031374	0.545289	0.263374	10	94	1	12662	LDB3
HP	Abnormal morphology of left ventricular trabeculae	HP:0031192	0.545289	0.263374	13	94	1	12662	LDB3
HP	Wrist drop	HP:0031189	0.545289	0.263374	4	94	1	12662	LDB3
HP	Mesoaxial hand polydactyly	HP:0006159	0.545289	0.263374	8	94	1	12662	FAM149B1
HP	Central Y-shaped metacarpal	HP:0006145	0.545289	0.263374	6	94	1	12662	FAM149B1
HP	Aplasia cutis congenita of scalp	HP:0007385	0.545289	0.263374	14	94	1	12662	BMS1
HP	Storage in hepatocytes	HP:0031137	0.545289	0.263374	94	94	3	12662	ADK,LOC100232471,POLR3A
HP	Absence of subcutaneous fat	HP:0007485	0.545289	0.263374	11	94	1	12662	POLR3A
HP	Abnormality of retinal pigmentation	HP:0007703	0.545289	0.263374	242	94	4	12662	KIF11,LOC100232471,POLR3A,RBP3
HP	Intrinsic hand muscle atrophy	HP:0008954	0.545289	0.263374	13	94	1	12662	LDB3
HP	Severe intrauterine growth retardation	HP:0008846	0.545289	0.263374	7	94	1	12662	POLR3A
HP	Hypoplastic vertebral bodies	HP:0008479	0.545289	0.263374	14	94	1	12662	POLR3A
HP	Irregular sclerotic endplates	HP:0008476	0.545289	0.263374	2	94	1	12662	POLR3A
HP	Cervical vertebral dysplasia	HP:0008469	0.545289	0.263374	1	94	1	12662	POLR3A
HP	Vertebral wedging	HP:0008422	0.545289	0.263374	11	94	1	12662	SUFU
HP	Secondary growth hormone deficiency	HP:0008240	0.545289	0.263374	15	94	1	12662	SUFU
HP	Hypothalamic hypothyroidism	HP:0008237	0.545289	0.263374	12	94	1	12662	SUFU
HP	Reduced circulating prolactin concentration	HP:0008202	0.545289	0.263374	12	94	1	12662	SUFU
HP	Confusion	HP:0001289	0.545289	0.263374	42	94	2	12662	FAS,POLR3A
HP	Retinal fold	HP:0008052	0.545289	0.263374	6	94	1	12662	KIF11
HP	Abnormality of the vasculature of the eye	HP:0008047	0.545289	0.263374	223	94	4	12662	BLNK,FAS,RBP3,STN1
HP	Chorioretinal lacunae	HP:0007858	0.545289	0.263374	1	94	1	12662	KIF11
HP	Posterior subcapsular cataract	HP:0007787	0.545289	0.263374	13	94	1	12662	RBP3
HP	Abnormal pulmonary thoracic imaging finding	HP:0031983	0.545289	0.263374	52	94	2	12662	FAS,STN1
HP	Abnormal fifth cranial nerve physiology	HP:0031911	0.545289	0.263374	14	94	1	12662	SUFU
HP	Optic disc hypoplasia	HP:0007766	0.545289	0.263374	15	94	1	12662	POLR3A
HP	Abnormal pulmonary valve physiology	HP:0031654	0.545289	0.263374	103	94	3	12662	ADK,POLR3A,STN1
HP	Abnormal heart valve physiology	HP:0031653	0.545289	0.263374	238	94	4	12662	ADK,FAS,POLR3A,STN1
HP	Retinal telangiectasia	HP:0007763	0.545289	0.263374	6	94	1	12662	STN1
HP	Weak extraocular muscles	HP:0007715	0.545289	0.263374	12	94	1	12662	SUFU
HP	Prematurely aged appearance	HP:0007495	0.545289	0.263374	100	94	3	12662	FAS,POLR3A,STN1
HP	Y-shaped metacarpals	HP:0006042	0.545289	0.263374	9	94	1	12662	FAM149B1
HP	Multiple pulmonary cysts	HP:0005948	0.545289	0.263374	14	94	1	12662	STN1
HP	Secondary microcephaly	HP:0005484	0.545289	0.263374	139	94	3	12662	EXOSC3,SLC25A22,TUBGCP2
HP	Autophagic vacuoles	HP:0003736	0.545289	0.263374	7	94	1	12662	LDB3
HP	Ear pain	HP:0030766	0.545289	0.263374	11	94	1	12662	SUFU
HP	Myofibrillar myopathy	HP:0003715	0.545289	0.263374	10	94	1	12662	LDB3
HP	Large beaked nose	HP:0003683	0.545289	0.263374	10	94	1	12662	POLR3A
HP	Antiphospholipid antibody positivity	HP:0003613	0.545289	0.263374	12	94	1	12662	FAS
HP	Muscle fiber splitting	HP:0003555	0.545289	0.263374	11	94	1	12662	LDB3
HP	Central nervous system cyst	HP:0030724	0.545289	0.263374	140	94	4	12662	EXOSC3,POLR3A,SUFU,TUBGCP2
HP	Muscle stiffness	HP:0003552	0.545289	0.263374	61	94	2	12662	KIF11,LDB3
HP	Left ventricular noncompaction	HP:0030682	0.545289	0.263374	13	94	1	12662	LDB3
HP	Abnormal morphology of myocardial trabeculae	HP:0030681	0.545289	0.263374	14	94	1	12662	LDB3
HP	Upper limb muscle weakness	HP:0003484	0.545289	0.263374	68	94	2	12662	LDB3,SUFU
HP	Platelet antibody positive	HP:0003454	0.545289	0.263374	3	94	1	12662	FAS
HP	Antineutrophil antibody positivity	HP:0003453	0.545289	0.263374	13	94	1	12662	FAS
HP	Atlantoaxial abnormality	HP:0003413	0.545289	0.263374	8	94	1	12662	POLR3A
HP	Irregular vertebral endplates	HP:0003301	0.545289	0.263374	22	94	2	12662	PAPSS2,POLR3A
HP	Sudanophilic leukodystrophy	HP:0003269	0.545289	0.263374	3	94	1	12662	POLR3A
HP	Antenatal onset	HP:0030674	0.545289	0.263374	11	94	1	12662	BICC1
HP	Smooth muscle antibody positivity	HP:0003262	0.545289	0.263374	7	94	1	12662	FAS
HP	Increased circulating IgA level	HP:0003261	0.545289	0.263374	16	94	1	12662	FAS
HP	Increased circulating IgG level	HP:0003237	0.545289	0.263374	12	94	1	12662	FAS
HP	Hypermethioninemia	HP:0003235	0.545289	0.263374	8	94	1	12662	ADK
HP	Phenotypic variability	HP:0003812	0.545289	0.263374	312	94	5	12662	ANXA11,EXOSC3,KCNMA1,KIF11,SUFU
HP	Abnormal serum interleukin level	HP:0030782	0.545289	0.263374	10	94	1	12662	FAS
HP	Variable expressivity	HP:0003828	0.545289	0.263374	225	94	4	12662	EXOSC3,KCNMA1,KIF11,SUFU
HP	Incomplete penetrance	HP:0003829	0.545289	0.263374	112	94	3	12662	ANXA11,KIF11,SUFU
HP	Calcification of falx cerebri	HP:0005462	0.545289	0.263374	5	94	1	12662	SUFU
HP	Bridged sella turcica	HP:0005449	0.545289	0.263374	3	94	1	12662	SUFU
HP	Increased B cell count	HP:0005404	0.545289	0.263374	6	94	1	12662	FAS
HP	Autonomic bladder dysfunction	HP:0005341	0.545289	0.263374	3	94	1	12662	POLR3A
HP	Progeroid facial appearance	HP:0005328	0.545289	0.263374	16	94	1	12662	POLR3A
HP	Gastritis	HP:0005263	0.545289	0.263374	11	94	1	12662	FAS
HP	Abnormal lymphocyte apoptosis	HP:0030886	0.545289	0.263374	6	94	1	12662	FAS
HP	Dysplastic pulmonary valve	HP:0005164	0.545289	0.263374	2	94	1	12662	POLR3A
HP	Abnormality of the vertebral endplates	HP:0005106	0.545289	0.263374	27	94	2	12662	PAPSS2,POLR3A
HP	Venous thrombosis	HP:0004936	0.545289	0.263374	55	94	2	12662	FAS,KIF11
HP	Leg muscle stiffness	HP:0008969	0.545289	0.263374	10	94	1	12662	LDB3
HP	Coombs-positive hemolytic anemia	HP:0004844	0.545289	0.263374	5	94	1	12662	FAS
HP	Hyperechogenic kidneys	HP:0004719	0.545289	0.263374	11	94	1	12662	BICC1
HP	Lumbar scoliosis	HP:0004626	0.545289	0.263374	3	94	1	12662	PAPSS2
HP	Widely patent fontanelles and sutures	HP:0004492	0.545289	0.263374	10	94	1	12662	POLR3A
HP	Aplasia cutis congenita over the scalp vertex	HP:0004471	0.545289	0.263374	4	94	1	12662	BMS1
HP	Agammaglobulinemia	HP:0004432	0.545289	0.263374	14	94	1	12662	BLNK
HP	Arterial thrombosis	HP:0004420	0.545289	0.263374	16	94	1	12662	FAS
HP	Hamartomatous polyposis	HP:0004390	0.545289	0.263374	11	94	1	12662	SUFU
HP	Abnormal circulating sulfur amino acid concentration	HP:0004339	0.545289	0.263374	16	94	1	12662	ADK
HP	Abnormal endocardium morphology	HP:0004306	0.545289	0.263374	36	94	2	12662	FAS,LDB3
HP	Irregular ossification of hand bones	HP:0004280	0.545289	0.263374	3	94	1	12662	SUFU
HP	Hamartomatous stomach polyps	HP:0004795	0.545289	0.263374	3	94	1	12662	SUFU
HP	Neoplasm of the skin	HP:0008069	0.545289	0.263374	139	94	3	12662	BLNK,FAS,SUFU
HP	Abnormal circulating androgen level	HP:0030347	0.545289	0.263374	56	94	2	12662	POLR3A,SUFU
HP	Abnormal liver morphology	HP:0410042	0.545289	0.263374	547	94	7	12662	ADK,BICC1,BLNK,FAS,LOC100232471,POLR3A,STN1
HP	Myopic astigmatism	HP:0500041	0.545289	0.263374	2	94	1	12662	KIF11
HP	Benign neoplasm of the central nervous system	HP:0100835	0.545289	0.263374	70	94	2	12662	FAM149B1,SUFU
HP	Orchitis	HP:0100796	0.545289	0.263374	9	94	1	12662	FAS
HP	Lymphocytosis	HP:0100827	0.545289	0.263374	15	94	1	12662	FAS
HP	Synovitis	HP:0100769	0.545289	0.263374	6	94	1	12662	POLR3A
HP	Verrucae	HP:0200043	0.545289	0.263374	15	94	1	12662	BLNK
HP	Gangrene	HP:0100758	0.545289	0.263374	31	94	2	12662	FAS,KIF11
HP	Skin nodule	HP:0200036	0.545289	0.263374	74	94	2	12662	FAS,KIF11
HP	Brain imaging abnormality	HP:0410263	0.550183	0.259493	78	94	2	12662	POLR3A,SUFU
HP	Leukodystrophy	HP:0002415	0.550183	0.259493	78	94	2	12662	LOC100232471,POLR3A
GO:MF	hormone binding	GO:0042562	0.550253	0.259438	43	94	1	12662	IDE
GO:MF	transcription coactivator activity	GO:0003713	0.550253	0.259438	139	94	2	12662	MMS19,SFR1
GO:MF	amino acid transmembrane transporter activity	GO:0015171	0.550253	0.259438	43	94	1	12662	SLC25A22
HP	Pulmonary interstitial high-resolution computed tomography abnormality	HP:0025389	0.55362	0.256788	17	94	1	12662	STN1
HP	Retinopathy	HP:0000488	0.55362	0.256788	80	94	2	12662	FAS,KIF11
HP	Chorioretinal dysplasia	HP:0007731	0.55362	0.256788	17	94	1	12662	KIF11
HP	Pericarditis	HP:0001701	0.55362	0.256788	17	94	1	12662	FAS
HP	Wide cranial sutures	HP:0010537	0.55362	0.256788	17	94	1	12662	POLR3A
HP	Retinal dysplasia	HP:0007973	0.55362	0.256788	17	94	1	12662	KIF11
HP	Hyperreflexia	HP:0001347	0.55362	0.256788	552	94	7	12662	EXOSC3,FAS,LOC100232471,POLR3A,RBP3,SLC25A22,TUBGCP2
HP	Pulmonary insufficiency	HP:0010444	0.55362	0.256788	17	94	1	12662	STN1
HP	Abnormal circulating aspartate family amino acid concentration	HP:0010899	0.55362	0.256788	17	94	1	12662	ADK
HP	Reduced consciousness/confusion	HP:0004372	0.55362	0.256788	253	94	4	12662	FAS,POLR3A,SLC25A22,SUFU
HP	Calvarial skull defect	HP:0001362	0.55362	0.256788	17	94	1	12662	BMS1
HP	Crackles	HP:0030830	0.55362	0.256788	17	94	1	12662	STN1
HP	Abnormal dura mater morphology	HP:0010652	0.55362	0.256788	17	94	1	12662	SUFU
HP	Abnormality of the nares	HP:0005288	0.553733	0.2567	452	94	6	12662	FAM149B1,KIF11,POLR3A,RBP3,SLC25A22,SUFU
GO:BP	porphyrin-containing compound metabolic process	GO:0006778	0.555308	0.255466	17	94	1	12662	LOC100232471
GO:BP	neutral lipid catabolic process	GO:0046461	0.555308	0.255466	17	94	1	12662	LOC100231740
GO:BP	response to pH	GO:0009268	0.555308	0.255466	17	94	1	12662	PKD2L1
GO:BP	excretion	GO:0007588	0.555308	0.255466	17	94	1	12662	KCNMA1
GO:BP	regulation of mitochondrial membrane permeability	GO:0046902	0.555308	0.255466	17	94	1	12662	PPIF
GO:BP	rhythmic behavior	GO:0007622	0.555308	0.255466	17	94	1	12662	ADRB1
GO:BP	anterograde axonal transport	GO:0008089	0.555308	0.255466	17	94	1	12662	AP3M1
GO:BP	acylglycerol catabolic process	GO:0046464	0.555308	0.255466	17	94	1	12662	LOC100231740
GO:BP	mitochondrial genome maintenance	GO:0000002	0.555308	0.255466	17	94	1	12662	SESN2
HP	Hypertonia	HP:0001276	0.555506	0.255312	774	94	9	12662	ANXA11,ENTPD1,EXOSC3,KIF11,LOC100232471,POLR3A,SLC25A22,STN1,TUBGCP2
HP	Abnormal larynx morphology	HP:0025423	0.556996	0.254148	81	94	2	12662	KCNMA1,POLR3A
HP	Skin ulcer	HP:0200042	0.556996	0.254148	81	94	2	12662	BMS1,KIF11
HP	Abnormality of the anterior fontanelle	HP:0000236	0.556996	0.254148	81	94	2	12662	POLR3A,SUFU
HP	Abnormal synaptic transmission	HP:0012535	0.561462	0.250679	83	94	2	12662	ANXA11,LDB3
HP	Arnold-Chiari type I malformation	HP:0007099	0.561462	0.250679	18	94	1	12662	POLR3A
HP	Abnormal synaptic transmission at the neuromuscular junction	HP:0003398	0.561462	0.250679	83	94	2	12662	ANXA11,LDB3
HP	Abnormality of hair pigmentation	HP:0009887	0.561462	0.250679	82	94	2	12662	FAS,STN1
HP	Single median maxillary incisor	HP:0006315	0.561462	0.250679	18	94	1	12662	SUFU
HP	Hodgkin lymphoma	HP:0012189	0.561462	0.250679	18	94	1	12662	FAS
HP	Bronchiectasis	HP:0002110	0.561462	0.250679	83	94	2	12662	BLNK,STN1
HP	Puberty and gonadal disorders	HP:0008373	0.561462	0.250679	456	94	6	12662	ENTPD1,PAPSS2,POLR3A,RBP3,SLC25A22,SUFU
HP	Abnormal peripheral nervous system synaptic transmission	HP:0030191	0.561462	0.250679	83	94	2	12662	ANXA11,LDB3
HP	Entropion	HP:0000621	0.561462	0.250679	18	94	1	12662	POLR3A
HP	Fatigable weakness	HP:0003473	0.561462	0.250679	82	94	2	12662	ANXA11,LDB3
HP	Panhypopituitarism	HP:0000871	0.561462	0.250679	18	94	1	12662	SUFU
GO:BP	rRNA processing	GO:0006364	0.564452	0.248373	81	94	2	12662	EXOSC3,PDCD11
GO:MF	lipid binding	GO:0008289	0.564521	0.24832	364	94	4	12662	ANXA11,MYOF,OPN4,PSD
HP	Abnormal thrombosis	HP:0001977	0.57101	0.243356	84	94	2	12662	FAS,KIF11
GO:CC	cytoplasmic vesicle membrane	GO:0030659	0.57141	0.243052	150	94	3	12662	AP3M1,MYOF,SEC31B
HP	Abnormal thalamic MRI signal intensity	HP:0012696	0.572099	0.242529	19	94	1	12662	SUFU
HP	Delayed closure of the anterior fontanelle	HP:0001476	0.572099	0.242529	19	94	1	12662	POLR3A
HP	Tongue fasciculations	HP:0001308	0.572099	0.242529	19	94	1	12662	EXOSC3
HP	Vertical supranuclear gaze palsy	HP:0000511	0.572099	0.242529	19	94	1	12662	POLR3A
HP	Reduced sperm motility	HP:0012207	0.572099	0.242529	19	94	1	12662	BICC1
HP	Abnormal eyelash morphology	HP:0000499	0.572099	0.242529	169	94	3	12662	FAS,KIF11,POLR3A
HP	Myoclonic spasms	HP:0003739	0.572099	0.242529	19	94	1	12662	SUFU
HP	Lipodystrophy	HP:0009125	0.572099	0.242529	85	94	2	12662	LDB3,POLR3A
HP	Short humerus	HP:0005792	0.572099	0.242529	19	94	1	12662	POLR3A
GO:BP	vesicle docking	GO:0048278	0.576281	0.239365	18	94	1	12662	EXOC6
GO:BP	vesicle transport along microtubule	GO:0047496	0.576281	0.239365	18	94	1	12662	AP3M1
GO:BP	negative regulation of telomere maintenance	GO:0032205	0.576281	0.239365	18	94	1	12662	STN1
GO:BP	ribonucleoside metabolic process	GO:0009119	0.576281	0.239365	18	94	1	12662	ADK
HP	Reduced subcutaneous adipose tissue	HP:0003758	0.57646	0.239231	22	94	1	12662	POLR3A
HP	Subcapsular cataract	HP:0000523	0.57646	0.239231	22	94	1	12662	RBP3
HP	Serositis	HP:0045073	0.57646	0.239231	21	94	1	12662	FAS
HP	Adipose tissue loss	HP:0008887	0.57646	0.239231	21	94	1	12662	POLR3A
HP	Abnormality of the gastric mucosa	HP:0004295	0.57646	0.239231	23	94	1	12662	FAS
HP	Increased circulating IgM level	HP:0003496	0.57646	0.239231	22	94	1	12662	FAS
HP	Bilateral cryptorchidism	HP:0008689	0.57646	0.239231	23	94	1	12662	FAM149B1
HP	Abnormal pulmonary Interstitial morphology	HP:0006530	0.57646	0.239231	98	94	2	12662	FAS,STN1
HP	Vertebral hypoplasia	HP:0008417	0.57646	0.239231	22	94	1	12662	POLR3A
HP	Bone marrow hypercellularity	HP:0031020	0.57646	0.239231	20	94	1	12662	FAS
HP	Slow decrease in visual acuity	HP:0007924	0.57646	0.239231	20	94	1	12662	SUFU
HP	Decreased proportion of CD4-positive helper T cells	HP:0005407	0.57646	0.239231	22	94	1	12662	FAS
HP	Abnormal circulating IgE level	HP:0410241	0.57646	0.239231	24	94	1	12662	FAS
HP	Supernumerary ribs	HP:0005815	0.57646	0.239231	20	94	1	12662	SUFU
HP	Decreased pulmonary function	HP:0005952	0.57646	0.239231	21	94	1	12662	SUFU
HP	Bilateral tonic-clonic seizure with focal onset	HP:0007334	0.57646	0.239231	21	94	1	12662	KCNMA1
HP	Aplasia/hypoplasia of the humerus	HP:0006507	0.57646	0.239231	20	94	1	12662	POLR3A
HP	Aplasia/Hypoplasia of the vertebrae	HP:0008515	0.57646	0.239231	22	94	1	12662	POLR3A
HP	Prominent superficial blood vessels	HP:0007394	0.57646	0.239231	23	94	1	12662	POLR3A
HP	Atypical absence seizure	HP:0007270	0.57646	0.239231	22	94	1	12662	KCNMA1
HP	Myalgia	HP:0003326	0.57646	0.239231	100	94	2	12662	FAS,POLR3A
HP	Esophageal varix	HP:0002040	0.57646	0.239231	23	94	1	12662	STN1
HP	Glomerulonephritis	HP:0000099	0.57646	0.239231	25	94	1	12662	FAS
HP	Frontal bossing	HP:0002007	0.57646	0.239231	282	94	4	12662	ADK,FAM149B1,POLR3A,SUFU
HP	Enlarged kidney	HP:0000105	0.57646	0.239231	23	94	1	12662	BICC1
HP	Oral ulcer	HP:0000155	0.57646	0.239231	25	94	1	12662	FAS
HP	Thin vermilion border	HP:0000233	0.57646	0.239231	283	94	4	12662	KCNMA1,KIF11,POLR3A,TUBGCP2
HP	Long foot	HP:0001833	0.57646	0.239231	21	94	1	12662	POLR3A
HP	Pancreatic cysts	HP:0001737	0.57646	0.239231	22	94	1	12662	BICC1
HP	Large hands	HP:0001176	0.57646	0.239231	25	94	1	12662	POLR3A
HP	Pulmonic stenosis	HP:0001642	0.57646	0.239231	86	94	2	12662	ADK,POLR3A
HP	Abnormal heart morphology	HP:0001627	0.57646	0.239231	955	94	10	12662	ADK,BICC1,FAM149B1,FAS,KIF11,LDB3,LOC100232471,POLR3A,SLC25A22,SUFU
HP	Ataxia	HP:0001251	0.57646	0.239231	706	94	8	12662	FAM149B1,FAS,KCNMA1,LOC100232471,POLR3A,SLC25A22,STN1,SUFU
HP	Slender build	HP:0001533	0.57646	0.239231	24	94	1	12662	POLR3A
HP	Spastic paraplegia	HP:0001258	0.57646	0.239231	99	94	2	12662	ENTPD1,LOC100232471
HP	Scaling skin	HP:0040189	0.57646	0.239231	20	94	1	12662	KIF11
HP	Cerebellar atrophy	HP:0001272	0.57646	0.239231	289	94	4	12662	EXOSC3,KCNMA1,POLR3A,SLC25A22
HP	Pain in head and neck region	HP:0046506	0.57646	0.239231	25	94	1	12662	SUFU
HP	Abnormality of the nasal alae	HP:0000429	0.57646	0.239231	499	94	6	12662	FAM149B1,KIF11,POLR3A,RBP3,SLC25A22,SUFU
HP	Dystonia	HP:0001332	0.57646	0.239231	394	94	5	12662	KCNMA1,LOC100232471,POLR3A,SLC25A22,STN1
HP	Recurrent otitis media	HP:0000403	0.57646	0.239231	99	94	2	12662	BLNK,POLR3A
HP	Cerebellar vermis hypoplasia	HP:0001320	0.57646	0.239231	182	94	3	12662	FAM149B1,POLR3A,SUFU
HP	Abnormality of the upper respiratory tract	HP:0002087	0.57646	0.239231	291	94	4	12662	ANXA11,BLNK,KCNMA1,POLR3A
HP	EMG: myopathic abnormalities	HP:0003458	0.57646	0.239231	92	94	2	12662	LDB3,SUFU
HP	Ureterocele	HP:0000070	0.57646	0.239231	22	94	1	12662	SLC25A22
HP	Episodic ataxia	HP:0002131	0.57646	0.239231	21	94	1	12662	SLC25A22
HP	Generalized muscle weakness	HP:0003324	0.57646	0.239231	90	94	2	12662	ANXA11,LDB3
HP	Abnormal proportion of CD4-positive helper T cells	HP:0500267	0.57646	0.239231	22	94	1	12662	FAS
HP	Immunologic hypersensitivity	HP:0100326	0.57646	0.239231	95	94	2	12662	FAS,SUFU
HP	Elevated serum creatinine	HP:0003259	0.57646	0.239231	22	94	1	12662	BICC1
HP	Increased circulating IgE level	HP:0003212	0.57646	0.239231	21	94	1	12662	FAS
HP	Soft tissue sarcoma	HP:0030448	0.57646	0.239231	95	94	2	12662	FAS,SUFU
HP	Thoracolumbar scoliosis	HP:0002944	0.57646	0.239231	20	94	1	12662	PAPSS2
HP	Abnormal conjunctiva morphology	HP:0000502	0.57646	0.239231	95	94	2	12662	BLNK,FAS
HP	Decreased circulating ACTH level	HP:0002920	0.57646	0.239231	20	94	1	12662	SUFU
HP	Prominent superficial veins	HP:0001015	0.57646	0.239231	20	94	1	12662	POLR3A
HP	Systemic lupus erythematosus	HP:0002725	0.57646	0.239231	23	94	1	12662	FAS
HP	Abnormal sella turcica morphology	HP:0002679	0.57646	0.239231	22	94	1	12662	SUFU
HP	Hyporeflexia of lower limbs	HP:0002600	0.57646	0.239231	22	94	1	12662	LDB3
HP	Spastic dysarthria	HP:0002464	0.57646	0.239231	21	94	1	12662	POLR3A
HP	Cerebellar malformation	HP:0002438	0.57646	0.239231	282	94	4	12662	EXOSC3,FAM149B1,POLR3A,SUFU
HP	Encephalitis	HP:0002383	0.57646	0.239231	21	94	1	12662	FAS
HP	Memory impairment	HP:0002354	0.57646	0.239231	96	94	2	12662	FAS,SUFU
HP	Gastrointestinal hemorrhage	HP:0002239	0.57646	0.239231	98	94	2	12662	FAS,STN1
HP	Pulmonary embolism	HP:0002204	0.57646	0.239231	25	94	1	12662	FAS
HP	Abnormal prolactin level	HP:0040086	0.57646	0.239231	20	94	1	12662	SUFU
HP	Abnormal vitamin B12 level	HP:0040126	0.57646	0.239231	20	94	1	12662	FAS
HP	Recurrent urinary tract infections	HP:0000010	0.57646	0.239231	90	94	2	12662	BICC1,POLR3A
HP	Muscular hypotonia of the trunk	HP:0008936	0.57646	0.239231	177	94	3	12662	EXOSC3,KCNMA1,TUBGCP2
HP	Dandy-Walker malformation	HP:0001305	0.57646	0.239231	99	94	2	12662	POLR3A,SUFU
HP	Abnormality of mouth shape	HP:0011338	0.57646	0.239231	186	94	3	12662	FAM149B1,KCNMA1,POLR3A
HP	Abnormality of skin adnexa morphology	HP:0011138	0.57646	0.239231	948	94	10	12662	FAM149B1,FAS,KCNMA1,KIF11,LOC100232471,PAPSS2,POLR3A,SLC25A22,STN1,TUBGCP2
HP	Clubbing of fingers	HP:0100759	0.57646	0.239231	21	94	1	12662	STN1
HP	Generalized clonic seizure	HP:0011169	0.57646	0.239231	24	94	1	12662	SLC25A22
HP	Natal tooth	HP:0000695	0.57646	0.239231	25	94	1	12662	POLR3A
HP	Abnormal size of pituitary gland	HP:0012504	0.57646	0.239231	21	94	1	12662	SUFU
HP	Decreased response to growth hormone stimuation test	HP:0000824	0.57646	0.239231	93	94	2	12662	POLR3A,SUFU
HP	Decreased circulating level of specific antibody	HP:0012475	0.57646	0.239231	20	94	1	12662	FAS
HP	Abnormality of the hypothalamus-pituitary axis	HP:0000864	0.57646	0.239231	277	94	4	12662	BICC1,NANOS1,POLR3A,SUFU
HP	Abnormal metabolic brain imaging by MRS	HP:0012705	0.57646	0.239231	21	94	1	12662	POLR3A
HP	Hyperthyroidism	HP:0000836	0.57646	0.239231	23	94	1	12662	POLR3A
HP	Abnormal growth hormone level	HP:0032367	0.57646	0.239231	98	94	2	12662	POLR3A,SUFU
HP	Oculomotor nerve palsy	HP:0012246	0.57646	0.239231	24	94	1	12662	SUFU
HP	Restlessness	HP:0000711	0.57646	0.239231	90	94	2	12662	ANXA11,KIF11
HP	Abnormality of the optic nerve	HP:0000587	0.57646	0.239231	591	94	7	12662	FAS,KIF11,LOC100232471,POLR3A,RBP3,SUFU,TUBGCP2
HP	Decreased proportion of CD4-positive T cells	HP:0032218	0.57646	0.239231	24	94	1	12662	FAS
HP	Abnormal circulating creatinine concentration	HP:0012100	0.57646	0.239231	24	94	1	12662	BICC1
HP	Aphthous ulcer	HP:0032154	0.57646	0.239231	24	94	1	12662	FAS
HP	Abnormal meningeal morphology	HP:0010651	0.57646	0.239231	90	94	2	12662	BICC1,SUFU
HP	Abnormal shape of the frontal region	HP:0011218	0.57646	0.239231	285	94	4	12662	ADK,FAM149B1,POLR3A,SUFU
HP	Abnormal hand bone ossification	HP:0010660	0.57646	0.239231	25	94	1	12662	SUFU
HP	Recurrent aphthous stomatitis	HP:0011107	0.57646	0.239231	23	94	1	12662	FAS
HP	Constitutional symptom	HP:0025142	0.57646	0.239231	691	94	8	12662	ANXA11,BICC1,BLNK,FAS,KIF11,LDB3,POLR3A,SUFU
HP	Abnormal bronchus morphology	HP:0025426	0.57646	0.239231	100	94	2	12662	BLNK,STN1
HP	Arachnoid cyst	HP:0100702	0.57646	0.239231	23	94	1	12662	BICC1
HP	Increased connective tissue	HP:0009025	0.57646	0.239231	21	94	1	12662	POLR3A
HP	Myositis	HP:0100614	0.57646	0.239231	22	94	1	12662	FAS
HP	Abnormal arachnoid mater morphology	HP:0100700	0.57646	0.239231	23	94	1	12662	BICC1
HP	Supernumerary bones of the axial skeleton	HP:0009144	0.57646	0.239231	20	94	1	12662	SUFU
HP	Impaired antigen-specific response	HP:0031404	0.57646	0.239231	24	94	1	12662	FAS
HP	Short phalanx of the thumb	HP:0009660	0.57646	0.239231	24	94	1	12662	SUFU
HP	Cough	HP:0012735	0.57646	0.239231	93	94	2	12662	BLNK,STN1
HP	Abnormality of the diencephalon	HP:0010662	0.57646	0.239231	87	94	2	12662	FAM149B1,SUFU
HP	Abnormal sperm morphology	HP:0012864	0.57646	0.239231	23	94	1	12662	NANOS1
HP	Abnormal male germ cell morphology	HP:0012863	0.57646	0.239231	23	94	1	12662	NANOS1
HP	Neoplasm of striated muscle	HP:0009728	0.57646	0.239231	25	94	1	12662	SUFU
HP	Abnormal germ cell morphology	HP:0012862	0.57646	0.239231	23	94	1	12662	NANOS1
HP	EEG with burst suppression	HP:0010851	0.57646	0.239231	25	94	1	12662	SLC25A22
HP	Abnormal proportion of CD4-positive T cells	HP:0031392	0.57646	0.239231	25	94	1	12662	FAS
HP	Ophthalmoplegia	HP:0000602	0.57646	0.239231	188	94	3	12662	LOC100232471,RBP3,SUFU
HP	Abnormality of neutrophils	HP:0001874	0.577607	0.238367	192	94	3	12662	BLNK,FAS,LDB3
HP	Abnormality of the optic disc	HP:0012795	0.577785	0.238234	504	94	6	12662	KIF11,LOC100232471,POLR3A,RBP3,SUFU,TUBGCP2
HP	Antinuclear antibody positivity	HP:0003493	0.582596	0.234632	26	94	1	12662	FAS
HP	Hypogonadotropic hypogonadism	HP:0000044	0.582596	0.234632	102	94	2	12662	POLR3A,SUFU
HP	Cystic liver disease	HP:0006706	0.582596	0.234632	26	94	1	12662	BICC1
HP	Impaired vibration sensation in the lower limbs	HP:0002166	0.582596	0.234632	26	94	1	12662	POLR3A
HP	Abnormal brain positron emission tomography	HP:0012657	0.582596	0.234632	26	94	1	12662	SUFU
HP	Abnormal brain FDG positron emission tomography	HP:0012658	0.582596	0.234632	26	94	1	12662	SUFU
HP	Keratoconjunctivitis sicca	HP:0001097	0.582596	0.234632	26	94	1	12662	FAS
HP	Autoimmune hemolytic anemia	HP:0001890	0.582596	0.234632	26	94	1	12662	FAS
HP	Abnormal hair morphology	HP:0001595	0.582596	0.234632	845	94	9	12662	FAM149B1,FAS,KCNMA1,KIF11,LOC100232471,PAPSS2,POLR3A,STN1,TUBGCP2
HP	Abnormal corpus striatum morphology	HP:0010994	0.582596	0.234632	26	94	1	12662	POLR3A
GO:BP	negative regulation of double-strand break repair	GO:2000780	0.583236	0.234156	19	94	1	12662	SHLD2
GO:BP	negative regulation of DNA biosynthetic process	GO:2000279	0.583236	0.234156	19	94	1	12662	STN1
GO:BP	response to cold	GO:0009409	0.583236	0.234156	19	94	1	12662	ADRB1
GO:BP	microtubule nucleation	GO:0007020	0.583236	0.234156	19	94	1	12662	TUBGCP2
GO:BP	positive regulation of DNA replication	GO:0045740	0.583236	0.234156	19	94	1	12662	STN1
GO:BP	regulation of intrinsic apoptotic signaling pathway	GO:2001242	0.583236	0.234156	84	94	2	12662	PPIF,RTKN2
GO:BP	negative regulation of DNA repair	GO:0045738	0.583236	0.234156	19	94	1	12662	SHLD2
GO:BP	multicellular organism aging	GO:0010259	0.583236	0.234156	19	94	1	12662	IDE
GO:BP	necroptotic process	GO:0070266	0.583236	0.234156	19	94	1	12662	PPIF
GO:BP	positive regulation of interferon-beta production	GO:0032728	0.583236	0.234156	19	94	1	12662	POLR3A
GO:BP	telomere capping	GO:0016233	0.583236	0.234156	19	94	1	12662	STN1
GO:BP	cellular metabolic compound salvage	GO:0043094	0.583236	0.234156	19	94	1	12662	ADK
HP	EEG with focal epileptiform discharges	HP:0011185	0.585624	0.232381	103	94	2	12662	KCNMA1,SLC25A22
HP	Pigmentary retinopathy	HP:0000580	0.585624	0.232381	103	94	2	12662	LOC100232471,POLR3A
GO:BP	base-excision repair	GO:0006284	0.587029	0.231341	21	94	1	12662	POLL
GO:BP	neuron fate specification	GO:0048665	0.587029	0.231341	22	94	1	12662	SUFU
GO:BP	axonal transport	GO:0098930	0.587029	0.231341	20	94	1	12662	AP3M1
GO:BP	negative regulation of organelle organization	GO:0010639	0.587029	0.231341	183	94	3	12662	GHITM,PPIF,STN1
GO:BP	SCF-dependent proteasomal ubiquitin-dependent protein catabolic process	GO:0031146	0.587029	0.231341	21	94	1	12662	FBXL15
GO:BP	microtubule-based movement	GO:0007018	0.587029	0.231341	179	94	3	12662	AP3M1,ENO4,KIF11
GO:BP	DNA repair	GO:0006281	0.587029	0.231341	274	94	4	12662	MMS19,POLL,SFR1,SHLD2
GO:BP	chondroitin sulfate proteoglycan metabolic process	GO:0050654	0.587029	0.231341	20	94	1	12662	CSGALNACT2
GO:BP	cytokinetic process	GO:0032506	0.587029	0.231341	20	94	1	12662	ANXA11
GO:BP	regulation of apoptotic signaling pathway	GO:2001233	0.587029	0.231341	180	94	3	12662	GHITM,PPIF,RTKN2
GO:BP	regulation of behavior	GO:0050795	0.587029	0.231341	20	94	1	12662	ADRB1
GO:BP	protein K63-linked deubiquitination	GO:0070536	0.587029	0.231341	22	94	1	12662	STAMBPL1
GO:BP	tetrapyrrole metabolic process	GO:0033013	0.587029	0.231341	23	94	1	12662	LOC100232471
GO:BP	regulation of immunoglobulin mediated immune response	GO:0002889	0.587029	0.231341	23	94	1	12662	SHLD2
GO:BP	synaptic vesicle localization	GO:0097479	0.587029	0.231341	21	94	1	12662	AP3M1
GO:BP	programmed necrotic cell death	GO:0097300	0.587029	0.231341	21	94	1	12662	PPIF
GO:BP	response to reactive oxygen species	GO:0000302	0.587029	0.231341	89	94	2	12662	PPIF,SESN2
GO:BP	cellular response to glucose starvation	GO:0042149	0.587029	0.231341	22	94	1	12662	SESN2
GO:BP	metal ion export	GO:0070839	0.587029	0.231341	23	94	1	12662	SLC35G1
GO:BP	neuron migration	GO:0001764	0.587029	0.231341	92	94	2	12662	NRG3,TUBGCP2
GO:BP	regulation of Ras protein signal transduction	GO:0046578	0.587029	0.231341	91	94	2	12662	PSD,RASGEF1A
GO:BP	positive regulation of Ras protein signal transduction	GO:0046579	0.587029	0.231341	23	94	1	12662	RASGEF1A
GO:BP	DNA biosynthetic process	GO:0071897	0.587029	0.231341	90	94	2	12662	POLL,STN1
GO:BP	inner mitochondrial membrane organization	GO:0007007	0.587029	0.231341	20	94	1	12662	GHITM
GO:BP	purine nucleoside monophosphate metabolic process	GO:0009126	0.587029	0.231341	23	94	1	12662	ADK
GO:BP	positive regulation of GTPase activity	GO:0043547	0.587029	0.231341	177	94	3	12662	ADRB1,ARHGAP22,LOC100222268
GO:BP	adherens junction organization	GO:0034332	0.587029	0.231341	21	94	1	12662	DLG5
GO:BP	regulation of B cell mediated immunity	GO:0002712	0.587029	0.231341	23	94	1	12662	SHLD2
GO:BP	ribonucleoside monophosphate biosynthetic process	GO:0009156	0.587029	0.231341	23	94	1	12662	ADK
GO:BP	membrane lipid catabolic process	GO:0046466	0.587029	0.231341	23	94	1	12662	LOC100231740
GO:BP	acidic amino acid transport	GO:0015800	0.587029	0.231341	22	94	1	12662	SLC25A22
GO:BP	purine ribonucleoside monophosphate metabolic process	GO:0009167	0.587029	0.231341	22	94	1	12662	ADK
GO:BP	rRNA metabolic process	GO:0016072	0.587029	0.231341	88	94	2	12662	EXOSC3,PDCD11
GO:BP	regulation of membrane permeability	GO:0090559	0.587029	0.231341	22	94	1	12662	PPIF
GO:BP	negative regulation of DNA recombination	GO:0045910	0.587029	0.231341	22	94	1	12662	SHLD2
GO:BP	2'-deoxyribonucleotide metabolic process	GO:0009394	0.587029	0.231341	21	94	1	12662	ADK
GO:BP	detection of light stimulus	GO:0009583	0.587029	0.231341	22	94	1	12662	OPN4
GO:BP	regulation of systemic arterial blood pressure mediated by a chemical signal	GO:0003044	0.587029	0.231341	23	94	1	12662	ADRB1
GO:BP	regulation of response to reactive oxygen species	GO:1901031	0.587029	0.231341	20	94	1	12662	SESN2
GO:BP	deoxyribose phosphate metabolic process	GO:0019692	0.587029	0.231341	22	94	1	12662	ADK
GO:BP	negative regulation of smoothened signaling pathway	GO:0045879	0.587029	0.231341	20	94	1	12662	SUFU
GO:BP	regulation of DNA metabolic process	GO:0051052	0.587029	0.231341	176	94	3	12662	MMS19,SHLD2,STN1
GO:BP	antigen processing and presentation	GO:0019882	0.587029	0.231341	23	94	1	12662	IDE
GO:BP	negative regulation of intracellular signal transduction	GO:1902532	0.587029	0.231341	280	94	4	12662	DLG5,PPIF,RTKN2,SESN2
GO:BP	detection of stimulus	GO:0051606	0.587029	0.231341	87	94	2	12662	OPN4,PKD2L1
GO:BP	detection of chemical stimulus	GO:0009593	0.587029	0.231341	20	94	1	12662	PKD2L1
GO:BP	sensory perception of taste	GO:0050909	0.587029	0.231341	21	94	1	12662	PKD2L1
GO:BP	regulation of isotype switching	GO:0045191	0.587029	0.231341	21	94	1	12662	SHLD2
GO:BP	spinal cord motor neuron differentiation	GO:0021522	0.587029	0.231341	22	94	1	12662	SUFU
GO:BP	protein palmitoylation	GO:0018345	0.587029	0.231341	23	94	1	12662	ZDHHC6
GO:BP	mitochondrial fusion	GO:0008053	0.587029	0.231341	20	94	1	12662	ZDHHC6
GO:BP	negative regulation of translation	GO:0017148	0.587029	0.231341	87	94	2	12662	NANOS1,SESN2
GO:BP	DNA metabolic process	GO:0006259	0.587029	0.231341	468	94	6	12662	MMS19,POLL,SESN2,SFR1,SHLD2,STN1
GO:BP	establishment or maintenance of epithelial cell apical/basal polarity	GO:0045197	0.587029	0.231341	20	94	1	12662	DLG5
GO:BP	epithelial tube branching involved in lung morphogenesis	GO:0060441	0.587029	0.231341	23	94	1	12662	DLG5
GO:BP	regulation of gluconeogenesis	GO:0006111	0.587029	0.231341	21	94	1	12662	SESN2
GO:BP	negative regulation of cellular amide metabolic process	GO:0034249	0.587029	0.231341	94	94	2	12662	NANOS1,SESN2
GO:BP	vesicle cytoskeletal trafficking	GO:0099518	0.587029	0.231341	23	94	1	12662	AP3M1
GO:BP	positive regulation of immunoglobulin production	GO:0002639	0.587029	0.231341	22	94	1	12662	SHLD2
GO:CC	exocyst	GO:0000145	0.58782	0.230756	15	94	1	12662	EXOC6
HP	Abnormality of the distal phalanx of the thumb	HP:0009617	0.588005	0.230619	27	94	1	12662	SUFU
HP	Maternal diabetes	HP:0009800	0.588005	0.230619	27	94	1	12662	SUFU
HP	Focal T2 hyperintense basal ganglia lesion	HP:0007183	0.588005	0.230619	27	94	1	12662	LOC100232471
HP	Decreased circulating cortisol level	HP:0008163	0.588005	0.230619	27	94	1	12662	SUFU
HP	Megalocornea	HP:0000485	0.588005	0.230619	27	94	1	12662	KCNMA1
HP	Late onset	HP:0003584	0.588005	0.230619	27	94	1	12662	LDB3
HP	Abnormality of vitamin B12 metabolism	HP:0004341	0.588005	0.230619	27	94	1	12662	FAS
HP	Reticulocytosis	HP:0001923	0.588005	0.230619	27	94	1	12662	FAS
HP	Pituitary hypothyroidism	HP:0008245	0.588005	0.230619	27	94	1	12662	SUFU
HP	Abnormal male reproductive system physiology	HP:0012874	0.588005	0.230619	198	94	3	12662	BICC1,NANOS1,SUFU
HP	Thickened calvaria	HP:0002684	0.588005	0.230619	27	94	1	12662	POLR3A
HP	Downturned corners of mouth	HP:0002714	0.589484	0.229528	105	94	2	12662	KCNMA1,POLR3A
HP	Cataract	HP:0000518	0.591917	0.227739	517	94	6	12662	ENTPD1,FAS,KIF11,POLR3A,RBP3,SUFU
HP	Pituitary adenoma	HP:0002893	0.591917	0.227739	28	94	1	12662	BICC1
HP	Dilatation of the cerebral artery	HP:0004944	0.591917	0.227739	28	94	1	12662	BICC1
HP	Urticaria	HP:0001025	0.591917	0.227739	28	94	1	12662	FAS
HP	Glomerulopathy	HP:0100820	0.591917	0.227739	28	94	1	12662	FAS
HP	Meningioma	HP:0002858	0.591917	0.227739	28	94	1	12662	SUFU
HP	Decreased activity of the pyruvate dehydrogenase complex	HP:0002928	0.591917	0.227739	28	94	1	12662	LOC100232471
HP	Keratoconjunctivitis	HP:0001096	0.591917	0.227739	28	94	1	12662	FAS
HP	Fatigable weakness of swallowing muscles	HP:0030195	0.591917	0.227739	28	94	1	12662	ANXA11
HP	Fatigable weakness of skeletal muscles	HP:0030197	0.591917	0.227739	28	94	1	12662	LDB3
HP	Chromosome breakage	HP:0040012	0.591917	0.227739	28	94	1	12662	SUFU
HP	Long toe	HP:0010511	0.591917	0.227739	28	94	1	12662	POLR3A
HP	Aplasia cutis congenita	HP:0001057	0.591917	0.227739	28	94	1	12662	BMS1
HP	Abnormal tongue physiology	HP:0030810	0.595495	0.225122	29	94	1	12662	EXOSC3
HP	Central scotoma	HP:0000603	0.595495	0.225122	29	94	1	12662	RBP3
HP	Precocious puberty	HP:0000826	0.595495	0.225122	109	94	2	12662	PAPSS2,SLC25A22
HP	Aplasia/Hypoplasia of the cerebellar vermis	HP:0006817	0.595495	0.225122	203	94	3	12662	FAM149B1,POLR3A,SUFU
HP	Incisor macrodontia	HP:0011081	0.595495	0.225122	29	94	1	12662	KCNMA1
HP	Episodic tachypnea	HP:0002876	0.595495	0.225122	29	94	1	12662	FAM149B1
HP	Abnormality of the mediastinum	HP:0045026	0.595495	0.225122	29	94	1	12662	SUFU
HP	Non-obstructive azoospermia	HP:0011961	0.595495	0.225122	29	94	1	12662	NANOS1
HP	Esotropia	HP:0000565	0.595495	0.225122	108	94	2	12662	FAM149B1,KCNMA1
HP	Fever	HP:0001945	0.595495	0.225122	204	94	3	12662	BLNK,FAS,POLR3A
HP	Abnormality of circulating adrenocorticotropin level	HP:0011043	0.595495	0.225122	29	94	1	12662	SUFU
HP	Hand muscle atrophy	HP:0009130	0.595495	0.225122	29	94	1	12662	LDB3
HP	Papilloma	HP:0012740	0.595495	0.225122	29	94	1	12662	BLNK
HP	Internal hemorrhage	HP:0011029	0.595495	0.225122	204	94	3	12662	FAS,STN1,SUFU
HP	Optic atrophy	HP:0000648	0.595829	0.224878	415	94	5	12662	KIF11,LOC100232471,POLR3A,RBP3,TUBGCP2
HP	Abnormal reflex	HP:0031826	0.595829	0.224878	869	94	9	12662	ENTPD1,EXOSC3,FAS,LDB3,LOC100232471,POLR3A,RBP3,SLC25A22,TUBGCP2
HP	Abnormality of the fourth ventricle	HP:0010950	0.596577	0.224333	110	94	2	12662	POLR3A,SUFU
HP	Dilated fourth ventricle	HP:0002198	0.596577	0.224333	110	94	2	12662	POLR3A,SUFU
HP	Decreased circulating antibody level	HP:0004313	0.596577	0.224333	110	94	2	12662	BLNK,FAS
HP	Advanced eruption of teeth	HP:0006288	0.596708	0.224238	30	94	1	12662	POLR3A
HP	Clonic seizure	HP:0020221	0.596708	0.224238	30	94	1	12662	SLC25A22
HP	Autoimmune thrombocytopenia	HP:0001973	0.596708	0.224238	30	94	1	12662	FAS
HP	Non-Hodgkin lymphoma	HP:0012539	0.596708	0.224238	30	94	1	12662	FAS
HP	Abnormal eyebrow morphology	HP:0000534	0.596708	0.224238	417	94	5	12662	FAM149B1,FAS,KCNMA1,POLR3A,TUBGCP2
HP	Hemianopia	HP:0012377	0.596708	0.224238	30	94	1	12662	SUFU
HP	Acanthosis nigricans	HP:0000956	0.596708	0.224238	30	94	1	12662	POLR3A
HP	Abnormal tongue morphology	HP:0030809	0.596708	0.224238	208	94	3	12662	EXOSC3,FAM149B1,KCNMA1
HP	Decreased circulating total IgM	HP:0002850	0.596708	0.224238	30	94	1	12662	FAS
HP	Early onset of sexual maturation	HP:0100000	0.596708	0.224238	111	94	2	12662	PAPSS2,SLC25A22
HP	Abnormality of the lens	HP:0000517	0.596708	0.224238	530	94	6	12662	ENTPD1,FAS,KIF11,POLR3A,RBP3,SUFU
HP	Upslanted palpebral fissure	HP:0000582	0.596708	0.224238	208	94	3	12662	KIF11,POLR3A,TUBGCP2
HP	Broad nasal tip	HP:0000455	0.599089	0.222509	112	94	2	12662	FAM149B1,KIF11
GO:BP	establishment or maintenance of apical/basal cell polarity	GO:0035088	0.600799	0.221271	24	94	1	12662	DLG5
GO:BP	cilium organization	GO:0044782	0.600799	0.221271	187	94	3	12662	ABLIM1,ENO4,FAM149B1
GO:BP	B cell receptor signaling pathway	GO:0050853	0.600799	0.221271	24	94	1	12662	BLNK
GO:BP	deoxyribonucleotide metabolic process	GO:0009262	0.600799	0.221271	24	94	1	12662	ADK
GO:BP	regulation of dendritic spine development	GO:0060998	0.600799	0.221271	24	94	1	12662	DLG5
GO:BP	establishment or maintenance of bipolar cell polarity	GO:0061245	0.600799	0.221271	24	94	1	12662	DLG5
GO:MF	protein tyrosine kinase binding	GO:1990782	0.602462	0.22007	49	94	1	12662	BLNK
HP	Narrow nasal bridge	HP:0000446	0.603817	0.219095	31	94	1	12662	SUFU
HP	Uveitis	HP:0000554	0.603817	0.219095	31	94	1	12662	FAS
HP	Nystagmus	HP:0000639	0.603817	0.219095	763	94	8	12662	EXOSC3,FAM149B1,KCNMA1,KIF11,LOC100232471,POLR3A,RBP3,SUFU
HP	Colitis	HP:0002583	0.603817	0.219095	31	94	1	12662	FAS
HP	Abnormality of vitamin B metabolism	HP:0004340	0.603817	0.219095	31	94	1	12662	FAS
HP	Death in childhood	HP:0003819	0.603817	0.219095	31	94	1	12662	SLC25A22
HP	Muscle fibrillation	HP:0010546	0.603817	0.219095	31	94	1	12662	EXOSC3
HP	Diffuse white matter abnormalities	HP:0007204	0.603817	0.219095	31	94	1	12662	SLC25A22
HP	Neoplasm of the central nervous system	HP:0100006	0.604568	0.218555	114	94	2	12662	FAM149B1,SUFU
HP	Esodeviation	HP:0020045	0.604568	0.218555	114	94	2	12662	FAM149B1,KCNMA1
HP	Abnormal bleeding	HP:0001892	0.604568	0.218555	316	94	4	12662	BMS1,FAS,STN1,SUFU
HP	Ophthalmoparesis	HP:0000597	0.605696	0.217746	212	94	3	12662	LOC100232471,RBP3,SUFU
GO:BP	syncytium formation by plasma membrane fusion	GO:0000768	0.607728	0.216291	25	94	1	12662	MYOF
GO:BP	cell-cell fusion	GO:0140253	0.607728	0.216291	25	94	1	12662	MYOF
GO:BP	necrotic cell death	GO:0070265	0.607728	0.216291	25	94	1	12662	PPIF
GO:BP	fear response	GO:0042596	0.607728	0.216291	25	94	1	12662	ADRB1
GO:BP	inorganic cation transmembrane transport	GO:0098662	0.607728	0.216291	393	94	5	12662	KCNMA1,LOC100190507,PKD2L1,PPIF,SLC35G1
GO:BP	response to estrogen	GO:0043627	0.607728	0.216291	25	94	1	12662	SFR1
GO:BP	phospholipid catabolic process	GO:0009395	0.607728	0.216291	25	94	1	12662	LOC100231740
GO:BP	positive regulation of BMP signaling pathway	GO:0030513	0.607728	0.216291	25	94	1	12662	FBXL15
GO:BP	regulation of transcription from RNA polymerase II promoter in response to stress	GO:0043618	0.607728	0.216291	25	94	1	12662	SESN2
GO:BP	syncytium formation	GO:0006949	0.607728	0.216291	25	94	1	12662	MYOF
HP	Congenital malformation of the left heart	HP:0045017	0.607937	0.216141	33	94	1	12662	POLR3A
HP	Abnormality of the external nose	HP:0010938	0.607937	0.216141	659	94	7	12662	FAM149B1,KIF11,POLR3A,RBP3,SLC25A22,SUFU,TUBGCP2
HP	Impaired proprioception	HP:0010831	0.607937	0.216141	33	94	1	12662	POLR3A
HP	Decreased adipose tissue	HP:0040063	0.607937	0.216141	33	94	1	12662	POLR3A
HP	Abnormal central motor function	HP:0011442	0.607937	0.216141	1365	94	13	12662	ANXA11,ENTPD1,EXOSC3,FAM149B1,FAS,KCNMA1,KIF11,LOC100232471,POLR3A,SLC25A22,STN1,SUFU,TUBGCP2
HP	Thyroiditis	HP:0100646	0.607937	0.216141	33	94	1	12662	FAS
HP	Abnormal involuntary eye movements	HP:0012547	0.607937	0.216141	771	94	8	12662	EXOSC3,FAM149B1,KCNMA1,KIF11,LOC100232471,POLR3A,RBP3,SUFU
HP	Laryngospasm	HP:0025425	0.607937	0.216141	33	94	1	12662	ANXA11
HP	Hand muscle weakness	HP:0030237	0.607937	0.216141	32	94	1	12662	LDB3
HP	Brisk reflexes	HP:0001348	0.607937	0.216141	32	94	1	12662	TUBGCP2
HP	Abnormality of the alveolar ridges	HP:0006477	0.607937	0.216141	33	94	1	12662	FAM149B1
HP	Portal hypertension	HP:0001409	0.607937	0.216141	33	94	1	12662	STN1
HP	Large for gestational age	HP:0001520	0.607937	0.216141	33	94	1	12662	SUFU
HP	Absent fingernail	HP:0001817	0.607937	0.216141	32	94	1	12662	SLC25A22
HP	Hypochromic anemia	HP:0001931	0.607937	0.216141	32	94	1	12662	FAS
HP	Distal upper limb amyotrophy	HP:0007149	0.607937	0.216141	32	94	1	12662	LDB3
HP	Duodenal atresia	HP:0002247	0.607937	0.216141	33	94	1	12662	SUFU
HP	Thyroid carcinoma	HP:0002890	0.607937	0.216141	33	94	1	12662	FAS
HP	Enlarged posterior fossa	HP:0005445	0.607937	0.216141	117	94	2	12662	POLR3A,SUFU
HP	Hemivertebrae	HP:0002937	0.607937	0.216141	33	94	1	12662	SUFU
HP	Prolonged bleeding time	HP:0003010	0.607937	0.216141	32	94	1	12662	BMS1
HP	Abnormal circulating hormone level	HP:0003117	0.607937	0.216141	322	94	4	12662	NANOS1,POLR3A,RBP3,SUFU
HP	Onset	HP:0003674	0.607937	0.216141	890	94	9	12662	ADK,BICC1,BLNK,EXOSC3,KCNMA1,LDB3,POLR3A,SUFU,TUBGCP2
HP	Hypoplastic ilia	HP:0000946	0.607937	0.216141	33	94	1	12662	POLR3A
HP	Hypertelorism	HP:0000316	0.607937	0.216141	544	94	6	12662	ADK,BLNK,FAM149B1,KCNMA1,POLR3A,SUFU
GO:MF	calcium ion binding	GO:0005509	0.609321	0.215154	380	94	4	12662	ANXA11,LOC100231740,PKD2L1,TLL2
HP	Abnormal hair quantity	HP:0011362	0.609911	0.214733	546	94	6	12662	FAS,KCNMA1,LOC100232471,PAPSS2,POLR3A,TUBGCP2
GO:CC	proton-transporting two-sector ATPase complex, proton-transporting domain	GO:0033177	0.611162	0.213844	16	94	1	12662	LOC100190507
HP	Large fontanelles	HP:0000239	0.612181	0.21312	119	94	2	12662	POLR3A,SUFU
HP	Abnormality of skull size	HP:0000240	0.612181	0.21312	1142	94	11	12662	ADK,ENTPD1,EXOSC3,FAM149B1,KCNMA1,KIF11,LOC100232471,POLR3A,SLC25A22,SUFU,TUBGCP2
HP	Macrocephaly	HP:0000256	0.612181	0.21312	325	94	4	12662	ADK,FAM149B1,POLR3A,SUFU
HP	Vesicoureteral reflux	HP:0000076	0.612181	0.21312	121	94	2	12662	BICC1,POLR3A
HP	Abnormal retinal morphology	HP:0000479	0.612181	0.21312	668	94	7	12662	EXOSC3,FAS,KIF11,LOC100232471,POLR3A,RBP3,STN1
HP	Diffuse cerebral atrophy	HP:0002506	0.612181	0.21312	35	94	1	12662	SLC25A22
HP	Abnormal number of incisors	HP:0011064	0.612181	0.21312	35	94	1	12662	SUFU
HP	Abnormality of blood circulation	HP:0011028	0.612181	0.21312	222	94	3	12662	FAS,STN1,SUFU
HP	Abnormality of circulating cortisol level	HP:0011731	0.612181	0.21312	34	94	1	12662	SUFU
HP	Abnormal B cell count	HP:0010975	0.612181	0.21312	34	94	1	12662	FAS
HP	Aplasia/Hypoplasia of the phalanges of the thumb	HP:0009658	0.612181	0.21312	34	94	1	12662	SUFU
HP	Proximal muscle weakness in upper limbs	HP:0008997	0.612181	0.21312	35	94	1	12662	LDB3
HP	Flat occiput	HP:0005469	0.612181	0.21312	35	94	1	12662	KIF11
HP	Abnormality of circulating glucocorticoid level	HP:0012111	0.612181	0.21312	35	94	1	12662	SUFU
HP	EMG: neuropathic changes	HP:0003445	0.612181	0.21312	34	94	1	12662	LDB3
HP	Abnormality of multiple cell lineages in the bone marrow	HP:0012145	0.612181	0.21312	121	94	2	12662	FAS,STN1
HP	Abnormal B cell morphology	HP:0002846	0.612181	0.21312	35	94	1	12662	FAS
HP	Postural tremor	HP:0002174	0.612181	0.21312	34	94	1	12662	POLR3A
HP	Abnormal basal ganglia MRI signal intensity	HP:0012751	0.612181	0.21312	35	94	1	12662	LOC100232471
HP	Abnormal granulocyte morphology	HP:0001911	0.612181	0.21312	222	94	3	12662	BLNK,FAS,LDB3
HP	Abnormality of corneal size	HP:0001120	0.612181	0.21312	122	94	2	12662	KCNMA1,KIF11
HP	Abnormality of coordination	HP:0011443	0.612181	0.21312	786	94	8	12662	FAM149B1,FAS,KCNMA1,LOC100232471,POLR3A,SLC25A22,STN1,SUFU
HP	Abnormality of the endocrine system	HP:0000818	0.612181	0.21312	899	94	9	12662	BICC1,ENTPD1,FAS,NANOS1,PAPSS2,POLR3A,RBP3,SLC25A22,SUFU
HP	Abnormal circulating luteinizing hormone level	HP:0030345	0.612181	0.21312	35	94	1	12662	SUFU
HP	Anterior hypopituitarism	HP:0000830	0.612181	0.21312	120	94	2	12662	POLR3A,SUFU
HP	Sprengel anomaly	HP:0000912	0.612181	0.21312	35	94	1	12662	SUFU
HP	Abnormality of the thoracic cavity	HP:0045027	0.612181	0.21312	34	94	1	12662	SUFU
GO:CC	pore complex	GO:0046930	0.612711	0.212744	17	94	1	12662	PPIF
GO:CC	integral component of membrane	GO:0016021	0.612711	0.212744	2797	94	26	12662	ADRB1,ANTXRL,ATRNL1,CALHM2,CH25H,CNNM1,CSGALNACT2,DNAJC18,ENTPD1,FUT11,GHITM,KCNMA1,LOC100190507,LOC100218935,LOC100232471,LRIT1,MFSD13A,MYOF,OPN4,PKD2L1,PPIF,SLC25A22,SLC35G1,SORCS1,VSTM4,ZDHHC6
GO:CC	exosome (RNase complex)	GO:0000178	0.612711	0.212744	17	94	1	12662	EXOSC3
KEGG	Vascular smooth muscle contraction	KEGG:04270	0.613497	0.212187	77	94	1	12662	KCNMA1
KEGG	Hedgehog signaling pathway	KEGG:04340	0.613497	0.212187	42	94	1	12662	SUFU
KEGG	Necroptosis	KEGG:04217	0.613497	0.212187	76	94	1	12662	FAS
KEGG	NOD-like receptor signaling pathway	KEGG:04621	0.613497	0.212187	83	94	1	12662	ANTXRL
KEGG	Cell cycle	KEGG:04110	0.613497	0.212187	81	94	1	12662	TFDP2
KEGG	Apoptosis	KEGG:04210	0.613497	0.212187	92	94	1	12662	FAS
KEGG	Phagosome	KEGG:04145	0.613497	0.212187	87	94	1	12662	LOC100190507
KEGG	Endocytosis	KEGG:04144	0.613497	0.212187	158	94	2	12662	PSD,WASHC2C
KEGG	Influenza A	KEGG:05164	0.613497	0.212187	81	94	1	12662	FAS
KEGG	Lysosome	KEGG:04142	0.613497	0.212187	88	94	1	12662	AP3M1
KEGG	Ribosome	KEGG:03010	0.613497	0.212187	74	94	1	12662	RPS24
KEGG	Biosynthesis of cofactors	KEGG:01240	0.613497	0.212187	81	94	1	12662	LOC100232471
KEGG	Ribosome biogenesis in eukaryotes	KEGG:03008	0.613497	0.212187	49	94	1	12662	BMS1
KEGG	Herpes simplex virus 1 infection	KEGG:05168	0.613497	0.212187	87	94	1	12662	FAS
KEGG	Carbon metabolism	KEGG:01200	0.613497	0.212187	71	94	1	12662	OGDHL
KEGG	Metabolic pathways	KEGG:01100	0.613497	0.212187	912	94	8	12662	ADK,CSGALNACT2,ENTPD1,LOC100190507,LOC100231740,LOC100232471,OGDHL,PAPSS2
KEGG	Glycerolipid metabolism	KEGG:00561	0.613497	0.212187	39	94	1	12662	LOC100231740
KEGG	Pyrimidine metabolism	KEGG:00240	0.613497	0.212187	45	94	1	12662	ENTPD1
HP	Abnormal metacarpal morphology	HP:0005916	0.615134	0.21103	123	94	2	12662	FAM149B1,SUFU
HP	Type II diabetes mellitus	HP:0005978	0.615134	0.21103	123	94	2	12662	POLR3A,RBP3
HP	Paraplegia	HP:0010550	0.615134	0.21103	123	94	2	12662	ENTPD1,LOC100232471
HP	Aplasia/Hypoplasia of the skin	HP:0008065	0.616362	0.210164	124	94	2	12662	BMS1,POLR3A
HP	Aplasia/Hypoplasia of the earlobes	HP:0009906	0.616362	0.210164	36	94	1	12662	POLR3A
HP	Interictal epileptiform activity	HP:0011182	0.616362	0.210164	226	94	3	12662	KCNMA1,SLC25A22,TUBGCP2
HP	Pulmonary infiltrates	HP:0002113	0.616362	0.210164	36	94	1	12662	FAS
HP	Abnormality of fundus pigmentation	HP:0031605	0.616362	0.210164	36	94	1	12662	RBP3
HP	Polyneuropathy	HP:0001271	0.616362	0.210164	36	94	1	12662	LDB3
HP	Interictal EEG abnormality	HP:0025373	0.616362	0.210164	226	94	3	12662	KCNMA1,SLC25A22,TUBGCP2
HP	Increased head circumference	HP:0040194	0.616362	0.210164	334	94	4	12662	ADK,FAM149B1,POLR3A,SUFU
HP	Pachygyria	HP:0001302	0.616362	0.210164	124	94	2	12662	SLC25A22,TUBGCP2
HP	Neutropenia	HP:0001875	0.616362	0.210164	124	94	2	12662	BLNK,FAS
GO:MF	phospholipase activity	GO:0004620	0.620246	0.207436	52	94	1	12662	LOC100231740
GO:MF	monooxygenase activity	GO:0004497	0.620246	0.207436	52	94	1	12662	CH25H
KEGG	Cytokine-cytokine receptor interaction	KEGG:04060	0.621139	0.206811	113	94	1	12662	FAS
KEGG	Autophagy - animal	KEGG:04140	0.621139	0.206811	102	94	1	12662	NRBF2
KEGG	Protein processing in endoplasmic reticulum	KEGG:04141	0.621139	0.206811	108	94	1	12662	SEC31B
KEGG	mTOR signaling pathway	KEGG:04150	0.621139	0.206811	109	94	1	12662	SESN2
HP	Amyotrophic lateral sclerosis	HP:0007354	0.623108	0.205437	37	94	1	12662	ANXA11
HP	Abnormality of the hepatic vasculature	HP:0006707	0.623108	0.205437	37	94	1	12662	STN1
HP	Thin ribs	HP:0000883	0.623108	0.205437	37	94	1	12662	POLR3A
HP	Abnormal form of the vertebral bodies	HP:0003312	0.623108	0.205437	228	94	3	12662	PAPSS2,POLR3A,SUFU
HP	Hypopituitarism	HP:0040075	0.623108	0.205437	126	94	2	12662	POLR3A,SUFU
HP	Broad phalanx of the toes	HP:0010174	0.623108	0.205437	37	94	1	12662	SLC25A22
HP	Abnormality of subcutaneous fat tissue	HP:0001001	0.623108	0.205437	37	94	1	12662	POLR3A
GO:BP	cell growth	GO:0016049	0.623132	0.20542	198	94	3	12662	KAZALD1,NANOS1,SESN2
GO:BP	interferon-beta production	GO:0032608	0.623132	0.20542	27	94	1	12662	POLR3A
GO:BP	axo-dendritic transport	GO:0008088	0.623132	0.20542	27	94	1	12662	AP3M1
GO:BP	positive regulation of smoothened signaling pathway	GO:0045880	0.623132	0.20542	27	94	1	12662	DLG5
GO:BP	L-alpha-amino acid transmembrane transport	GO:1902475	0.623132	0.20542	27	94	1	12662	SLC25A22
GO:BP	amyloid-beta metabolic process	GO:0050435	0.623132	0.20542	27	94	1	12662	IDE
GO:BP	mammary gland morphogenesis	GO:0060443	0.623132	0.20542	26	94	1	12662	NRG3
GO:BP	export across plasma membrane	GO:0140115	0.623132	0.20542	27	94	1	12662	SLC35G1
GO:BP	coronary vasculature development	GO:0060976	0.623132	0.20542	27	94	1	12662	SUFU
GO:BP	positive regulation of DNA metabolic process	GO:0051054	0.623132	0.20542	104	94	2	12662	MMS19,SHLD2
GO:BP	circadian rhythm	GO:0007623	0.623132	0.20542	103	94	2	12662	ADRB1,OPN4
GO:BP	regulation of synapse organization	GO:0050807	0.623132	0.20542	104	94	2	12662	ARHGAP22,DLG5
GO:BP	regulation of synapse structure or activity	GO:0050803	0.623132	0.20542	104	94	2	12662	ARHGAP22,DLG5
GO:BP	hippo signaling	GO:0035329	0.623132	0.20542	27	94	1	12662	DLG5
GO:BP	cellular lipid catabolic process	GO:0044242	0.623132	0.20542	104	94	2	12662	LOC100231740,SESN2
GO:BP	response to osmotic stress	GO:0006970	0.623132	0.20542	27	94	1	12662	KCNMA1
GO:BP	regulation of interferon-beta production	GO:0032648	0.623132	0.20542	27	94	1	12662	POLR3A
GO:BP	positive regulation of small GTPase mediated signal transduction	GO:0051057	0.623132	0.20542	27	94	1	12662	RASGEF1A
HP	Premature loss of teeth	HP:0006480	0.62395	0.20485	39	94	1	12662	POLR3A
HP	Abnormal circulating follicle-stimulating hormone level	HP:0030346	0.62395	0.20485	39	94	1	12662	SUFU
HP	Abnormal female reproductive system physiology	HP:0030012	0.62395	0.20485	231	94	3	12662	FAS,PAPSS2,SUFU
HP	Abnormal neutrophil count	HP:0011991	0.62395	0.20485	131	94	2	12662	BLNK,FAS
HP	Stomatitis	HP:0010280	0.62395	0.20485	39	94	1	12662	FAS
HP	Spinal dysraphism	HP:0010301	0.62395	0.20485	127	94	2	12662	BMS1,SUFU
HP	Neoplasm of the nervous system	HP:0004375	0.62395	0.20485	131	94	2	12662	FAM149B1,SUFU
HP	Abnormality of thalamus morphology	HP:0010663	0.62395	0.20485	40	94	1	12662	SUFU
HP	T lymphocytopenia	HP:0005403	0.62395	0.20485	40	94	1	12662	FAS
HP	Abnormality of T cell physiology	HP:0011840	0.62395	0.20485	39	94	1	12662	FAS
HP	Cranial nerve paralysis	HP:0006824	0.62395	0.20485	233	94	3	12662	BMS1,FAS,SUFU
HP	Hand polydactyly	HP:0001161	0.62395	0.20485	129	94	2	12662	FAM149B1,SUFU
HP	Abnormal fundus morphology	HP:0001098	0.62395	0.20485	924	94	9	12662	EXOSC3,FAS,KIF11,LOC100232471,POLR3A,RBP3,STN1,SUFU,TUBGCP2
HP	Papilledema	HP:0001085	0.62395	0.20485	40	94	1	12662	SUFU
HP	Abnormal posterior eye segment morphology	HP:0004329	0.62395	0.20485	925	94	9	12662	EXOSC3,FAS,KIF11,LOC100232471,POLR3A,RBP3,STN1,SUFU,TUBGCP2
HP	Inflammation of the large intestine	HP:0002037	0.62395	0.20485	39	94	1	12662	FAS
HP	Oligodontia	HP:0000677	0.62395	0.20485	40	94	1	12662	POLR3A
HP	Abnormal myeloid leukocyte morphology	HP:0010974	0.62395	0.20485	234	94	3	12662	BLNK,FAS,LDB3
HP	Pain	HP:0012531	0.62395	0.20485	461	94	5	12662	ANXA11,BICC1,FAS,POLR3A,SUFU
HP	Hemoptysis	HP:0002105	0.62395	0.20485	39	94	1	12662	FAS
HP	Abnormality of the ureter	HP:0000069	0.62395	0.20485	235	94	3	12662	BICC1,POLR3A,SLC25A22
HP	Generalized non-motor (absence) seizure	HP:0002121	0.62395	0.20485	131	94	2	12662	KCNMA1,SLC25A22
HP	Sarcoma	HP:0100242	0.62395	0.20485	129	94	2	12662	FAS,SUFU
HP	Chronic sinusitis	HP:0011109	0.62395	0.20485	38	94	1	12662	BLNK
HP	Abnormal cranial nerve physiology	HP:0031910	0.62395	0.20485	236	94	3	12662	BMS1,FAS,SUFU
HP	Abnormal oral frenulum morphology	HP:0000190	0.62395	0.20485	39	94	1	12662	FAM149B1
HP	Eosinophilia	HP:0001880	0.62395	0.20485	39	94	1	12662	FAS
HP	Abnormal eosinophil morphology	HP:0001879	0.62395	0.20485	40	94	1	12662	FAS
HP	Abnormal eosinophil count	HP:0020064	0.62395	0.20485	39	94	1	12662	FAS
HP	Prominent occiput	HP:0000269	0.62395	0.20485	40	94	1	12662	SUFU
HP	Mandibular prognathia	HP:0000303	0.62395	0.20485	129	94	2	12662	KIF11,SUFU
HP	Abnormality of the cerebellar vermis	HP:0002334	0.62395	0.20485	233	94	3	12662	FAM149B1,POLR3A,SUFU
HP	Abnormality of the chin	HP:0000306	0.62395	0.20485	230	94	3	12662	KIF11,POLR3A,SUFU
HP	Tinnitus	HP:0000360	0.62395	0.20485	38	94	1	12662	SUFU
HP	Abnormal larynx physiology	HP:0025424	0.62395	0.20485	39	94	1	12662	ANXA11
HP	Muscle weakness	HP:0001324	0.62395	0.20485	694	94	7	12662	ANXA11,BMS1,EXOSC3,LDB3,POLR3A,SLC25A22,SUFU
HP	Protruding ear	HP:0000411	0.62395	0.20485	130	94	2	12662	KIF11,TUBGCP2
HP	Vasculitis	HP:0002633	0.62395	0.20485	39	94	1	12662	FAS
HP	Abnormal T cell subset distribution	HP:0025540	0.62395	0.20485	39	94	1	12662	FAS
HP	Fatigue	HP:0012378	0.62395	0.20485	236	94	3	12662	ANXA11,BLNK,FAS
HP	Supranuclear gaze palsy	HP:0000605	0.62395	0.20485	38	94	1	12662	POLR3A
HP	Ectropion	HP:0000656	0.62395	0.20485	40	94	1	12662	POLR3A
HP	Impotence	HP:0000802	0.62395	0.20485	39	94	1	12662	SUFU
HP	Progressive muscle weakness	HP:0003323	0.62395	0.20485	38	94	1	12662	LDB3
HP	Fatigable weakness of bulbar muscles	HP:0030192	0.62395	0.20485	40	94	1	12662	ANXA11
HP	Abnormality of the liver	HP:0001392	0.623976	0.204832	696	94	7	12662	ADK,BICC1,BLNK,FAS,LOC100232471,POLR3A,STN1
GO:BP	regulation of DNA-templated transcription in response to stress	GO:0043620	0.624168	0.204698	28	94	1	12662	SESN2
GO:BP	regulation of neuron migration	GO:2001222	0.624168	0.204698	28	94	1	12662	NRG3
GO:BP	negative regulation of ubiquitin-dependent protein catabolic process	GO:2000059	0.624168	0.204698	28	94	1	12662	SUFU
GO:BP	cellular response to calcium ion	GO:0071277	0.624168	0.204698	28	94	1	12662	PPIF
GO:BP	glycerolipid catabolic process	GO:0046503	0.624168	0.204698	28	94	1	12662	LOC100231740
GO:BP	protein peptidyl-prolyl isomerization	GO:0000413	0.624168	0.204698	28	94	1	12662	PPIF
GO:BP	nuclear-transcribed mRNA catabolic process, deadenylation-dependent decay	GO:0000288	0.624168	0.204698	28	94	1	12662	NANOS1
GO:BP	organelle localization by membrane tethering	GO:0140056	0.624168	0.204698	28	94	1	12662	EXOC6
GO:BP	regulation of TORC1 signaling	GO:1903432	0.624168	0.204698	28	94	1	12662	SESN2
GO:BP	negative regulation of T cell proliferation	GO:0042130	0.624168	0.204698	28	94	1	12662	DLG5
GO:BP	neural tube patterning	GO:0021532	0.624168	0.204698	28	94	1	12662	SUFU
GO:BP	visual behavior	GO:0007632	0.624168	0.204698	28	94	1	12662	OPN4
GO:BP	ribonucleoprotein complex biogenesis	GO:0022613	0.624168	0.204698	199	94	3	12662	BMS1,EXOSC3,PDCD11
HP	Weakness due to upper motor neuron dysfunction	HP:0010549	0.627749	0.202214	349	94	4	12662	ENTPD1,FAS,LOC100232471,SUFU
GO:CC	exoribonuclease complex	GO:1905354	0.627999	0.202041	18	94	1	12662	EXOSC3
GO:CC	spindle pole	GO:0000922	0.63137	0.199716	84	94	2	12662	KIF11,TUBGCP2
GO:CC	mitotic spindle	GO:0072686	0.63137	0.199716	85	94	2	12662	KIF11,TFDP2
HP	Amenorrhea	HP:0000141	0.631416	0.199684	134	94	2	12662	PAPSS2,SUFU
HP	Decreased serum estradiol	HP:0008214	0.631923	0.199336	41	94	1	12662	SUFU
HP	Abnormality of the humerus	HP:0003063	0.631923	0.199336	41	94	1	12662	POLR3A
HP	Upper limb amyotrophy	HP:0009129	0.631923	0.199336	41	94	1	12662	LDB3
HP	Clinical modifier	HP:0012823	0.633595	0.198188	1322	94	12	12662	ADK,ANXA11,BICC1,BLNK,EXOSC3,KCNMA1,KIF11,LDB3,POLR3A,SLC25A22,SUFU,TUBGCP2
HP	Abnormality of the posterior pituitary	HP:0011751	0.633595	0.198188	42	94	1	12662	SUFU
HP	Abnormal ureter physiology	HP:0025634	0.633595	0.198188	137	94	2	12662	BICC1,POLR3A
HP	Abnormal hypothalamus physiology	HP:0012285	0.633595	0.198188	44	94	1	12662	SUFU
HP	Abnormal nasolacrimal system morphology	HP:0000614	0.633595	0.198188	44	94	1	12662	KIF11
HP	Intestinal atresia	HP:0011100	0.633595	0.198188	42	94	1	12662	SUFU
HP	Delayed puberty	HP:0000823	0.633595	0.198188	139	94	2	12662	ENTPD1,POLR3A
HP	Retinal dystrophy	HP:0000556	0.633595	0.198188	247	94	3	12662	EXOSC3,KIF11,RBP3
HP	Secondary amenorrhea	HP:0000869	0.633595	0.198188	43	94	1	12662	PAPSS2
HP	Sparse and thin eyebrow	HP:0000535	0.633595	0.198188	43	94	1	12662	POLR3A
HP	Abnormal posterior cranial fossa morphology	HP:0000932	0.633595	0.198188	139	94	2	12662	POLR3A,SUFU
HP	Melanocytic nevus	HP:0000995	0.633595	0.198188	44	94	1	12662	SUFU
HP	Lymphedema	HP:0001004	0.633595	0.198188	44	94	1	12662	KIF11
HP	Hirsutism	HP:0001007	0.633595	0.198188	137	94	2	12662	PAPSS2,POLR3A
HP	Abnormality of the nasal tip	HP:0000436	0.633595	0.198188	245	94	3	12662	FAM149B1,KIF11,TUBGCP2
HP	Lissencephaly	HP:0001339	0.633595	0.198188	139	94	2	12662	SLC25A22,TUBGCP2
HP	Cerebral hemorrhage	HP:0001342	0.633595	0.198188	44	94	1	12662	SUFU
HP	Macrodontia	HP:0001572	0.633595	0.198188	42	94	1	12662	KCNMA1
HP	Pancreatitis	HP:0001733	0.633595	0.198188	42	94	1	12662	FAS
HP	Deep philtrum	HP:0002002	0.633595	0.198188	44	94	1	12662	KIF11
HP	Renal agenesis	HP:0000104	0.633595	0.198188	138	94	2	12662	FAM149B1,SUFU
HP	Malabsorption	HP:0002024	0.633595	0.198188	136	94	2	12662	BLNK,FAS
HP	Tall stature	HP:0000098	0.633595	0.198188	137	94	2	12662	POLR3A,SUFU
HP	Abnormality of the respiratory system	HP:0002086	0.633595	0.198188	1316	94	12	12662	ANXA11,BLNK,EXOSC3,FAM149B1,FAS,KCNMA1,KIF11,LOC100232471,POLR3A,SLC25A22,STN1,SUFU
HP	Osteomyelitis	HP:0002754	0.633595	0.198188	42	94	1	12662	BLNK
HP	Vertebral fusion	HP:0002948	0.633595	0.198188	43	94	1	12662	SUFU
HP	Abnormality of visual evoked potentials	HP:0000649	0.633595	0.198188	42	94	1	12662	SLC25A22
HP	Skeletal muscle hypertrophy	HP:0003712	0.633595	0.198188	136	94	2	12662	KCNMA1,POLR3A
HP	Decreased circulating IgG level	HP:0004315	0.633595	0.198188	43	94	1	12662	FAS
HP	Abnormality of bone marrow cell morphology	HP:0005561	0.633595	0.198188	139	94	2	12662	FAS,STN1
HP	Progressive spastic paraplegia	HP:0007020	0.633595	0.198188	42	94	1	12662	LOC100232471
HP	Motor neuron atrophy	HP:0007373	0.633595	0.198188	44	94	1	12662	ANXA11
HP	Abnormal neural tube morphology	HP:0410043	0.633595	0.198188	139	94	2	12662	BMS1,SUFU
HP	Primary adrenal insufficiency	HP:0008207	0.633595	0.198188	43	94	1	12662	SUFU
HP	Abnormal cellular physiology	HP:0011017	0.633595	0.198188	359	94	4	12662	BLNK,FAS,LOC100232471,SUFU
HP	Abnormality of fontanelles	HP:0011328	0.633595	0.198188	137	94	2	12662	POLR3A,SUFU
HP	Morphological central nervous system abnormality	HP:0002011	0.633595	0.198188	1953	94	17	12662	ADK,ANXA11,BICC1,BLNK,BMS1,ENTPD1,EXOSC3,FAM149B1,FAS,KCNMA1,KIF11,LOC100232471,NANOS1,POLR3A,SLC25A22,SUFU,TUBGCP2
HP	Abnormality of head blood vessel	HP:3000036	0.633595	0.198188	44	94	1	12662	POLR3A
HP	Premature skin wrinkling	HP:0100678	0.633595	0.198188	44	94	1	12662	POLR3A
HP	Abnormality of salivation	HP:0100755	0.633595	0.198188	135	94	2	12662	ANXA11,POLR3A
HP	Neural tube defect	HP:0045005	0.633595	0.198188	139	94	2	12662	BMS1,SUFU
HP	Inflammatory abnormality of the eye	HP:0100533	0.633595	0.198188	137	94	2	12662	BLNK,FAS
GO:BP	potassium ion transmembrane transport	GO:0071805	0.633699	0.198117	109	94	2	12662	KCNMA1,PKD2L1
GO:BP	nucleoside monophosphate biosynthetic process	GO:0009124	0.633699	0.198117	29	94	1	12662	ADK
GO:BP	apical junction assembly	GO:0043297	0.633699	0.198117	29	94	1	12662	DLG5
GO:BP	positive regulation of type I interferon production	GO:0032481	0.633699	0.198117	29	94	1	12662	POLR3A
GO:BP	negative regulation of TOR signaling	GO:0032007	0.633699	0.198117	29	94	1	12662	SESN2
GO:BP	gluconeogenesis	GO:0006094	0.633699	0.198117	29	94	1	12662	SESN2
GO:BP	positive regulation of NIK/NF-kappaB signaling	GO:1901224	0.633699	0.198117	29	94	1	12662	RTKN2
HP	Down-sloping shoulders	HP:0200021	0.635593	0.196821	45	94	1	12662	SUFU
HP	Sparse eyelashes	HP:0000653	0.635593	0.196821	45	94	1	12662	POLR3A
HP	Abnormality of the integument	HP:0001574	0.635593	0.196821	1711	94	15	12662	BLNK,BMS1,FAM149B1,FAS,KCNMA1,KIF11,LDB3,LOC100232471,PAPSS2,POLR3A,RBP3,SLC25A22,STN1,SUFU,TUBGCP2
HP	Xerostomia	HP:0000217	0.635593	0.196821	45	94	1	12662	ANXA11
HP	Back pain	HP:0003418	0.635593	0.196821	45	94	1	12662	SUFU
HP	Arthritis	HP:0001369	0.635593	0.196821	142	94	2	12662	BLNK,FAS
HP	Abnormal retinal vascular morphology	HP:0008046	0.635593	0.196821	142	94	2	12662	RBP3,STN1
HP	Simplified gyral pattern	HP:0009879	0.635593	0.196821	45	94	1	12662	KIF11
HP	Abnormality of the cerebral subcortex	HP:0010993	0.635593	0.196821	838	94	8	12662	ENTPD1,FAM149B1,KCNMA1,LOC100232471,POLR3A,SLC25A22,SUFU,TUBGCP2
HP	Abnormal pericardium morphology	HP:0001697	0.635593	0.196821	45	94	1	12662	FAS
HP	Hemiplegia/hemiparesis	HP:0004374	0.635593	0.196821	141	94	2	12662	FAS,SUFU
HP	Non-motor seizure	HP:0033259	0.635593	0.196821	141	94	2	12662	KCNMA1,SLC25A22
HP	Neoplasm by histology	HP:0011792	0.635995	0.196546	251	94	3	12662	FAM149B1,FAS,SUFU
HP	Status epilepticus	HP:0002133	0.636358	0.196299	143	94	2	12662	KCNMA1,KIF11
HP	Myoclonic seizure	HP:0032794	0.636358	0.196299	143	94	2	12662	KCNMA1,SLC25A22
HP	Abnormal nervous system morphology	HP:0012639	0.636358	0.196299	2096	94	18	12662	ADK,ANXA11,BICC1,BLNK,BMS1,ENTPD1,EXOSC3,FAM149B1,FAS,KCNMA1,KIF11,LDB3,LOC100232471,NANOS1,POLR3A,SLC25A22,SUFU,TUBGCP2
HP	Neoplasm of the peripheral nervous system	HP:0100007	0.638266	0.194999	46	94	1	12662	SUFU
HP	Abnormal reticulocyte morphology	HP:0004312	0.638266	0.194999	46	94	1	12662	FAS
HP	Aplasia/Hypoplasia involving the vertebral column	HP:0008518	0.638266	0.194999	46	94	1	12662	POLR3A
HP	Underdeveloped supraorbital ridges	HP:0009891	0.638266	0.194999	46	94	1	12662	KIF11
HP	Visual field defect	HP:0001123	0.638266	0.194999	144	94	2	12662	RBP3,SUFU
HP	Abnormal myocardium morphology	HP:0001637	0.638266	0.194999	366	94	4	12662	FAS,LDB3,LOC100232471,SUFU
HP	Autoimmune antibody positivity	HP:0030057	0.638266	0.194999	46	94	1	12662	FAS
HP	Abnormal aggressive, impulsive or violent behavior	HP:0006919	0.640318	0.193604	254	94	3	12662	ENTPD1,KIF11,SLC25A22
HP	Abnormal circulating IgM level	HP:0410243	0.641594	0.192739	47	94	1	12662	FAS
HP	Decreased serum testosterone level	HP:0040171	0.641594	0.192739	47	94	1	12662	SUFU
HP	Abnormal cellular phenotype	HP:0025354	0.641594	0.192739	369	94	4	12662	BLNK,FAS,LOC100232471,SUFU
HP	Fatigable weakness of respiratory muscles	HP:0030196	0.641594	0.192739	47	94	1	12662	ANXA11
HP	Abnormality of epidermal morphology	HP:0011124	0.641594	0.192739	47	94	1	12662	KIF11
HP	Abnormal blistering of the skin	HP:0008066	0.641594	0.192739	47	94	1	12662	FAS
HP	Truncal ataxia	HP:0002078	0.641594	0.192739	47	94	1	12662	POLR3A
HP	Reduced visual acuity	HP:0007663	0.641594	0.192739	369	94	4	12662	FAS,KIF11,RBP3,SUFU
HP	Abnormality of chromosome stability	HP:0003220	0.641594	0.192739	47	94	1	12662	SUFU
GO:CC	intercalated disc	GO:0014704	0.642647	0.192027	21	94	1	12662	NRAP
GO:CC	myofibril	GO:0030016	0.642647	0.192027	88	94	2	12662	LDB3,NRAP
GO:CC	intrinsic component of membrane	GO:0031224	0.642647	0.192027	2842	94	26	12662	ADRB1,ANTXRL,ATRNL1,CALHM2,CH25H,CNNM1,CSGALNACT2,DNAJC18,ENTPD1,FUT11,GHITM,KCNMA1,LOC100190507,LOC100218935,LOC100232471,LRIT1,MFSD13A,MYOF,OPN4,PKD2L1,PPIF,SLC25A22,SLC35G1,SORCS1,VSTM4,ZDHHC6
GO:CC	clathrin coat	GO:0030118	0.642647	0.192027	21	94	1	12662	AP3M1
GO:CC	contractile fiber	GO:0043292	0.642647	0.192027	91	94	2	12662	LDB3,NRAP
HP	Abnormal muscle tone	HP:0003808	0.645137	0.190348	1478	94	13	12662	ADK,ANXA11,ENTPD1,EXOSC3,FAM149B1,KCNMA1,KIF11,LOC100232471,POLR3A,SLC25A22,STN1,SUFU,TUBGCP2
HP	Abnormal circulating bilirubin concentration	HP:0033479	0.645137	0.190348	48	94	1	12662	ADK
HP	Brachydactyly	HP:0001156	0.645137	0.190348	259	94	3	12662	FAM149B1,PAPSS2,SUFU
HP	Abnormal sperm motility	HP:0012206	0.645137	0.190348	48	94	1	12662	BICC1
HP	Aplasia/hypoplasia of the femur	HP:0005613	0.645137	0.190348	48	94	1	12662	POLR3A
HP	Hyperbilirubinemia	HP:0002904	0.645137	0.190348	48	94	1	12662	ADK
HP	Abnormal circulating IgG level	HP:0410242	0.645137	0.190348	48	94	1	12662	FAS
HP	Abnormal pulmonary valve morphology	HP:0001641	0.645137	0.190348	48	94	1	12662	POLR3A
HP	Poor head control	HP:0002421	0.645137	0.190348	147	94	2	12662	EXOSC3,SLC25A22
HP	Developmental regression	HP:0002376	0.645137	0.190348	259	94	3	12662	FAS,POLR3A,SLC25A22
HP	Abnormal circulating IgA level	HP:0410240	0.645137	0.190348	48	94	1	12662	FAS
HP	Abnormal cornea morphology	HP:0000481	0.645137	0.190348	492	94	5	12662	FAS,KCNMA1,KIF11,POLR3A,RBP3
HP	Short ribs	HP:0000773	0.646954	0.189127	49	94	1	12662	SUFU
HP	Visual loss	HP:0000572	0.646954	0.189127	149	94	2	12662	KIF11,SUFU
HP	Increased circulating gonadotropin level	HP:0000837	0.646954	0.189127	49	94	1	12662	NANOS1
HP	Bone marrow hypocellularity	HP:0005528	0.646954	0.189127	49	94	1	12662	FAS
HP	Intestinal polyp	HP:0005266	0.646954	0.189127	49	94	1	12662	SUFU
HP	Excessive daytime somnolence	HP:0001262	0.646954	0.189127	49	94	1	12662	SUFU
HP	Abnormal cerebral artery morphology	HP:0009145	0.646954	0.189127	49	94	1	12662	BICC1
HP	Central hypothyroidism	HP:0011787	0.646954	0.189127	49	94	1	12662	SUFU
HP	Decreased circulating androgen level	HP:0030349	0.646954	0.189127	49	94	1	12662	SUFU
GO:BP	cellular response to amino acid starvation	GO:0034198	0.647216	0.188951	30	94	1	12662	SESN2
GO:BP	regulation of immunoglobulin production	GO:0002637	0.647216	0.188951	30	94	1	12662	SHLD2
GO:BP	regulation of response to DNA damage stimulus	GO:2001020	0.647216	0.188951	111	94	2	12662	MMS19,SHLD2
GO:BP	response to amino acid starvation	GO:1990928	0.647216	0.188951	30	94	1	12662	SESN2
HP	Hypergonadotropic hypogonadism	HP:0000815	0.647963	0.18845	50	94	1	12662	POLR3A
HP	Papule	HP:0200034	0.647963	0.18845	50	94	1	12662	FAS
HP	Abnormal T cell count	HP:0011839	0.647963	0.18845	50	94	1	12662	FAS
HP	Abnormality of the upper arm	HP:0001454	0.647963	0.18845	50	94	1	12662	POLR3A
HP	Hypertriglyceridemia	HP:0002155	0.647963	0.18845	50	94	1	12662	POLR3A
HP	Abnormality of the skull base	HP:0002693	0.647963	0.18845	151	94	2	12662	POLR3A,SUFU
HP	Abnormal immunoglobulin level	HP:0010701	0.647963	0.18845	152	94	2	12662	BLNK,FAS
HP	Localized skin lesion	HP:0011355	0.647963	0.18845	619	94	6	12662	BMS1,FAS,KIF11,POLR3A,RBP3,SUFU
HP	Constriction of peripheral visual field	HP:0001133	0.647963	0.18845	50	94	1	12662	RBP3
HP	Abnormality of movement	HP:0100022	0.647963	0.18845	1489	94	13	12662	ENTPD1,EXOSC3,FAM149B1,FAS,KCNMA1,LDB3,LOC100232471,POLR3A,RBP3,SLC25A22,STN1,SUFU,TUBGCP2
HP	Clumsiness	HP:0002312	0.647963	0.18845	50	94	1	12662	POLR3A
HP	Arnold-Chiari malformation	HP:0002308	0.647963	0.18845	50	94	1	12662	POLR3A
HP	Aplasia/Hypoplasia of the cerebrum	HP:0007364	0.647963	0.18845	1113	94	10	12662	ENTPD1,EXOSC3,FAM149B1,KCNMA1,KIF11,LOC100232471,POLR3A,SLC25A22,SUFU,TUBGCP2
HP	Left ventricular hypertrophy	HP:0001712	0.649033	0.187733	51	94	1	12662	LDB3
HP	Hepatocellular carcinoma	HP:0001402	0.649033	0.187733	51	94	1	12662	FAS
HP	Neoplasm by anatomical site	HP:0011793	0.649033	0.187733	621	94	6	12662	BICC1,BLNK,FAM149B1,FAS,KIF11,SUFU
HP	Abnormality of the metacarpal bones	HP:0001163	0.649033	0.187733	154	94	2	12662	FAM149B1,SUFU
HP	Anophthalmia	HP:0000528	0.649033	0.187733	51	94	1	12662	KIF11
HP	Erectile dysfunction	HP:0100639	0.649033	0.187733	51	94	1	12662	SUFU
HP	Abnormal muscle physiology	HP:0011804	0.649033	0.187733	1749	94	15	12662	ADK,ANXA11,BMS1,ENTPD1,EXOSC3,FAM149B1,KCNMA1,KIF11,LDB3,LOC100232471,POLR3A,SLC25A22,STN1,SUFU,TUBGCP2
HP	Anonychia	HP:0001798	0.649033	0.187733	51	94	1	12662	SLC25A22
HP	Premature ovarian insufficiency	HP:0008209	0.649033	0.187733	51	94	1	12662	FAS
HP	Biparietal narrowing	HP:0004422	0.649033	0.187733	51	94	1	12662	FAM149B1
HP	Abnormal T cell morphology	HP:0002843	0.649033	0.187733	51	94	1	12662	FAS
HP	Short philtrum	HP:0000322	0.649033	0.187733	154	94	2	12662	POLR3A,SUFU
HP	Abnormality of B cell physiology	HP:0005372	0.649033	0.187733	153	94	2	12662	BLNK,FAS
HP	Abnormal respiratory system morphology	HP:0012252	0.64963	0.187334	870	94	8	12662	ANXA11,BLNK,FAS,KCNMA1,KIF11,POLR3A,SLC25A22,STN1
GO:BP	purine nucleoside triphosphate biosynthetic process	GO:0009145	0.651442	0.186124	31	94	1	12662	ADK
GO:BP	nucleoside metabolic process	GO:0009116	0.651442	0.186124	31	94	1	12662	ADK
GO:BP	somatic recombination of immunoglobulin genes involved in immune response	GO:0002204	0.651442	0.186124	31	94	1	12662	SHLD2
GO:BP	inorganic ion transmembrane transport	GO:0098660	0.651442	0.186124	421	94	5	12662	KCNMA1,LOC100190507,PKD2L1,PPIF,SLC35G1
GO:BP	isotype switching	GO:0045190	0.651442	0.186124	31	94	1	12662	SHLD2
GO:BP	L-amino acid transport	GO:0015807	0.651442	0.186124	31	94	1	12662	SLC25A22
GO:BP	somatic diversification of immunoglobulins involved in immune response	GO:0002208	0.651442	0.186124	31	94	1	12662	SHLD2
GO:BP	hexose biosynthetic process	GO:0019319	0.651442	0.186124	31	94	1	12662	SESN2
GO:BP	phosphatidylcholine metabolic process	GO:0046470	0.651442	0.186124	31	94	1	12662	LOC100231740
GO:BP	nucleotide-excision repair	GO:0006289	0.651442	0.186124	31	94	1	12662	POLL
GO:CC	proton-transporting V-type ATPase complex	GO:0033176	0.652227	0.185601	22	94	1	12662	LOC100190507
HP	Abnormal cellular immune system morphology	HP:0010987	0.652736	0.185263	385	94	4	12662	BLNK,FAS,KIF11,LDB3
HP	Scotoma	HP:0000575	0.652736	0.185263	52	94	1	12662	RBP3
HP	Abnormal leukocyte morphology	HP:0001881	0.652736	0.185263	385	94	4	12662	BLNK,FAS,KIF11,LDB3
HP	Keratitis	HP:0000491	0.652736	0.185263	52	94	1	12662	FAS
HP	Thin eyebrow	HP:0045074	0.652736	0.185263	52	94	1	12662	POLR3A
HP	Abnormal left ventricular function	HP:0005162	0.652736	0.185263	52	94	1	12662	LDB3
GO:BP	regulation of small GTPase mediated signal transduction	GO:0051056	0.653092	0.185025	114	94	2	12662	PSD,RASGEF1A
HP	Functional abnormality of male internal genitalia	HP:0000025	0.653143	0.184992	156	94	2	12662	BICC1,NANOS1
HP	Heterotropia	HP:0032012	0.653143	0.184992	156	94	2	12662	FAM149B1,KCNMA1
HP	Abnormality of calvarial morphology	HP:0002648	0.653273	0.184906	628	94	6	12662	ADK,BMS1,FAM149B1,KIF11,POLR3A,SUFU
HP	Acute coronary syndrome	HP:0033678	0.653643	0.184659	53	94	1	12662	FAS
HP	Myocardial infarction	HP:0001658	0.653643	0.184659	53	94	1	12662	FAS
HP	Epicanthus	HP:0000286	0.653643	0.184659	388	94	4	12662	BLNK,FAM149B1,KIF11,SUFU
HP	Delayed cranial suture closure	HP:0000270	0.653643	0.184659	53	94	1	12662	POLR3A
HP	Sensorineural hearing impairment	HP:0000407	0.653643	0.184659	629	94	6	12662	ADK,FAM149B1,FAS,LDB3,RBP3,SUFU
HP	Hypermetropia	HP:0000540	0.653643	0.184659	157	94	2	12662	KIF11,POLR3A
HP	Abnormality of incisor morphology	HP:0011063	0.653643	0.184659	53	94	1	12662	KCNMA1
HP	Lower limb spasticity	HP:0002061	0.653643	0.184659	157	94	2	12662	ENTPD1,LOC100232471
HP	Abnormality of the middle ear	HP:0000370	0.653643	0.184659	388	94	4	12662	BLNK,FAM149B1,POLR3A,RBP3
GO:MF	dioxygenase activity	GO:0051213	0.654494	0.184095	56	94	1	12662	ADO
HP	Prominent forehead	HP:0011220	0.655603	0.183359	158	94	2	12662	FAM149B1,KIF11
HP	Hypoplastic male external genitalia	HP:0000050	0.656091	0.183036	390	94	4	12662	NANOS1,RBP3,SLC25A22,SUFU
HP	Abnormal conjugate eye movement	HP:0000549	0.657593	0.182043	757	94	7	12662	EXOSC3,FAM149B1,KCNMA1,LOC100232471,POLR3A,SLC25A22,SUFU
HP	Abnormality of the forehead	HP:0000290	0.657593	0.182043	758	94	7	12662	ADK,FAM149B1,KIF11,POLR3A,SLC25A22,SUFU,TUBGCP2
HP	Skin pit	HP:0100276	0.657593	0.182043	54	94	1	12662	SUFU
HP	Ovarian neoplasm	HP:0100615	0.657593	0.182043	54	94	1	12662	SUFU
HP	Abnormality of ocular smooth pursuit	HP:0000617	0.657593	0.182043	54	94	1	12662	POLR3A
HP	Neoplasm of the thyroid gland	HP:0100031	0.657593	0.182043	54	94	1	12662	FAS
GO:MF	single-stranded DNA binding	GO:0003697	0.659582	0.180731	57	94	1	12662	STN1
HP	Abnormal granulocyte count	HP:0032309	0.659808	0.180582	160	94	2	12662	BLNK,FAS
HP	Abnormal peripheral nervous system morphology	HP:0000759	0.659808	0.180582	636	94	6	12662	BMS1,FAS,LDB3,LOC100232471,POLR3A,SUFU
HP	Relative macrocephaly	HP:0004482	0.661211	0.17966	55	94	1	12662	POLR3A
HP	Generalized amyotrophy	HP:0003700	0.661211	0.17966	55	94	1	12662	POLR3A
HP	Recurrent pneumonia	HP:0006532	0.661211	0.17966	55	94	1	12662	BLNK
HP	Abnormality of the basal ganglia	HP:0002134	0.661211	0.17966	161	94	2	12662	LOC100232471,POLR3A
HP	Atrophy/Degeneration affecting the central nervous system	HP:0007367	0.661211	0.17966	638	94	6	12662	ADK,ANXA11,EXOSC3,KCNMA1,POLR3A,SLC25A22
HP	Duplication of phalanx of hand	HP:0009997	0.661211	0.17966	161	94	2	12662	FAM149B1,SUFU
GO:BP	TORC1 signaling	GO:0038202	0.662629	0.17873	32	94	1	12662	SESN2
GO:BP	immunoglobulin production involved in immunoglobulin-mediated immune response	GO:0002381	0.662629	0.17873	32	94	1	12662	SHLD2
GO:BP	midbrain development	GO:0030901	0.662629	0.17873	32	94	1	12662	DLG5
GO:BP	brown fat cell differentiation	GO:0050873	0.662629	0.17873	32	94	1	12662	ADRB1
HP	Abnormal cerebral white matter morphology	HP:0002500	0.664026	0.177815	766	94	7	12662	ENTPD1,FAM149B1,KCNMA1,POLR3A,SLC25A22,SUFU,TUBGCP2
HP	Triphalangeal thumb	HP:0001199	0.664026	0.177815	56	94	1	12662	SUFU
HP	Sparse or absent eyelashes	HP:0200102	0.664026	0.177815	56	94	1	12662	POLR3A
HP	Duplication of hand bones	HP:0004275	0.664026	0.177815	162	94	2	12662	FAM149B1,SUFU
HP	Infantile onset	HP:0003593	0.664026	0.177815	397	94	4	12662	ADK,BLNK,KCNMA1,TUBGCP2
HP	Aortic regurgitation	HP:0001659	0.664026	0.177815	56	94	1	12662	FAS
HP	Convex nasal ridge	HP:0000444	0.664026	0.177815	56	94	1	12662	POLR3A
HP	Dialeptic seizure	HP:0011146	0.664026	0.177815	163	94	2	12662	KCNMA1,SLC25A22
HP	Duplication of bones involving the upper extremities	HP:0009142	0.664026	0.177815	162	94	2	12662	FAM149B1,SUFU
GO:MF	neurotransmitter receptor activity	GO:0030594	0.664537	0.177481	58	94	1	12662	ADRB1
HP	Generalized hypotonia	HP:0001290	0.665386	0.176926	767	94	7	12662	ADK,EXOSC3,FAM149B1,KCNMA1,LOC100232471,POLR3A,SUFU
HP	Abnormal immune system morphology	HP:0032251	0.665819	0.176644	399	94	4	12662	BLNK,FAS,KIF11,LDB3
HP	Cerebral atrophy	HP:0002059	0.665819	0.176644	521	94	5	12662	ADK,EXOSC3,KCNMA1,POLR3A,SLC25A22
HP	Abnormality of temperature regulation	HP:0004370	0.665819	0.176644	280	94	3	12662	BLNK,FAS,POLR3A
HP	Abnormality of blood and blood-forming tissues	HP:0001871	0.665819	0.176644	894	94	8	12662	BLNK,BMS1,FAS,KIF11,LDB3,LOC100232471,STN1,SUFU
HP	Adult onset	HP:0003581	0.665819	0.176644	164	94	2	12662	LDB3,SUFU
GO:BP	negative regulation of signal transduction	GO:0009968	0.666414	0.176256	656	94	7	12662	BICC1,DLG5,GHITM,PPIF,RTKN2,SESN2,SUFU
HP	Aggressive behavior	HP:0000718	0.666922	0.175925	165	94	2	12662	ENTPD1,KIF11
HP	Tachypnea	HP:0002789	0.666922	0.175925	57	94	1	12662	FAM149B1
HP	Abnormality of vitamin metabolism	HP:0100508	0.666922	0.175925	57	94	1	12662	FAS
HP	Aplasia/Hypoplasia of the nails	HP:0008386	0.666922	0.175925	165	94	2	12662	POLR3A,SLC25A22
HP	Avascular necrosis	HP:0010885	0.667037	0.17585	58	94	1	12662	FAS
HP	Abnormal delivery	HP:0001787	0.667037	0.17585	58	94	1	12662	POLR3A
HP	Abnormal cerebral cortex morphology	HP:0002538	0.667037	0.17585	524	94	5	12662	KIF11,POLR3A,SLC25A22,SUFU,TUBGCP2
HP	Increased inflammatory response	HP:0012649	0.667037	0.17585	649	94	6	12662	BICC1,BLNK,FAS,KIF11,PAPSS2,POLR3A
HP	Holoprosencephaly	HP:0001360	0.667037	0.17585	58	94	1	12662	SUFU
HP	Abnormal inflammatory response	HP:0012647	0.667037	0.17585	649	94	6	12662	BICC1,BLNK,FAS,KIF11,PAPSS2,POLR3A
HP	Headache	HP:0002315	0.667037	0.17585	166	94	2	12662	FAS,SUFU
HP	Dehydration	HP:0001944	0.667037	0.17585	58	94	1	12662	BLNK
HP	Neoplasm of the stomach	HP:0006753	0.667037	0.17585	58	94	1	12662	SUFU
HP	Aortic root aneurysm	HP:0002616	0.667037	0.17585	58	94	1	12662	BICC1
HP	Abnormal eyelid morphology	HP:0000492	0.667037	0.17585	897	94	8	12662	BLNK,FAM149B1,FAS,KCNMA1,KIF11,POLR3A,SUFU,TUBGCP2
HP	Neoplasm	HP:0002664	0.667492	0.175554	650	94	6	12662	BICC1,BLNK,FAM149B1,FAS,KIF11,SUFU
HP	Paraplegia/paraparesis	HP:0010551	0.667492	0.175554	167	94	2	12662	ENTPD1,LOC100232471
HP	Abnormal oral physiology	HP:0031815	0.669486	0.174258	169	94	2	12662	ANXA11,POLR3A
HP	Dysarthria	HP:0001260	0.669486	0.174258	407	94	4	12662	ENTPD1,LOC100232471,POLR3A,SUFU
HP	Wide nasal bridge	HP:0000431	0.669486	0.174258	406	94	4	12662	KCNMA1,KIF11,RBP3,SUFU
HP	Intellectual disability, mild	HP:0001256	0.669486	0.174258	285	94	3	12662	KIF11,POLR3A,SUFU
HP	Atrophy/Degeneration affecting the cerebrum	HP:0007369	0.669486	0.174258	529	94	5	12662	ADK,EXOSC3,KCNMA1,POLR3A,SLC25A22
HP	Decreased activity of mitochondrial respiratory chain	HP:0008972	0.669486	0.174258	59	94	1	12662	LOC100232471
HP	Facial palsy	HP:0010628	0.669486	0.174258	168	94	2	12662	BMS1,SUFU
HP	Diabetes mellitus	HP:0000819	0.669486	0.174258	286	94	3	12662	POLR3A,RBP3,SUFU
HP	Anorexia	HP:0002039	0.669486	0.174258	59	94	1	12662	FAS
HP	Abnormality of the seventh cranial nerve	HP:0010827	0.669486	0.174258	169	94	2	12662	BMS1,SUFU
HP	Thin skin	HP:0000963	0.669486	0.174258	59	94	1	12662	POLR3A
HP	Abnormal hand morphology	HP:0005922	0.669804	0.174052	287	94	3	12662	POLR3A,SLC25A22,SUFU
HP	Growth abnormality	HP:0001507	0.669804	0.174052	1806	94	15	12662	ADK,BLNK,ENTPD1,EXOSC3,FAM149B1,FAS,KCNMA1,KIF11,LOC100232471,PAPSS2,POLR3A,RBP3,SLC25A22,STN1,SUFU
HP	Abnormal fingertip morphology	HP:0001211	0.669804	0.174052	60	94	1	12662	STN1
HP	Increased CSF lactate	HP:0002490	0.669804	0.174052	61	94	1	12662	LOC100232471
HP	External genital hypoplasia	HP:0003241	0.669804	0.174052	411	94	4	12662	NANOS1,RBP3,SLC25A22,SUFU
HP	Syndactyly	HP:0001159	0.669804	0.174052	290	94	3	12662	BMS1,FAM149B1,POLR3A
HP	Abnormal emotion/affect behavior	HP:0100851	0.669804	0.174052	411	94	4	12662	ENTPD1,FAS,KIF11,SLC25A22
HP	Abnormality of the plantar skin of foot	HP:0100872	0.669804	0.174052	61	94	1	12662	SUFU
HP	Abnormality of humoral immunity	HP:0005368	0.669804	0.174052	172	94	2	12662	BLNK,FAS
HP	Gastrointestinal atresia	HP:0002589	0.669804	0.174052	61	94	1	12662	SUFU
HP	CNS hypomyelination	HP:0003429	0.669804	0.174052	61	94	1	12662	POLR3A
HP	Impaired vibratory sensation	HP:0002495	0.669804	0.174052	61	94	1	12662	POLR3A
HP	Abnormal CSF lactate level	HP:0030085	0.669804	0.174052	61	94	1	12662	LOC100232471
HP	Abnormal activity of mitochondrial respiratory chain	HP:0011922	0.669804	0.174052	60	94	1	12662	LOC100232471
HP	Sudden cardiac death	HP:0001645	0.669804	0.174052	61	94	1	12662	LDB3
HP	Increased circulating antibody level	HP:0010702	0.669804	0.174052	61	94	1	12662	FAS
HP	Male sexual dysfunction	HP:0040307	0.669804	0.174052	61	94	1	12662	SUFU
HP	Thickened skin	HP:0001072	0.669804	0.174052	290	94	3	12662	KIF11,LDB3,POLR3A
HP	Apraxia	HP:0002186	0.669804	0.174052	171	94	2	12662	EXOSC3,SUFU
HP	Preaxial polydactyly	HP:0100258	0.669804	0.174052	61	94	1	12662	FAM149B1
HP	Abnormality of connective tissue	HP:0003549	0.670112	0.173853	1040	94	9	12662	BLNK,EXOSC3,FAS,KIF11,LDB3,POLR3A,RBP3,SLC25A22,SUFU
GO:BP	sensory perception of chemical stimulus	GO:0007606	0.670488	0.173609	33	94	1	12662	PKD2L1
GO:BP	exocytic process	GO:0140029	0.670488	0.173609	33	94	1	12662	EXOC6
GO:BP	pigment biosynthetic process	GO:0046148	0.670488	0.173609	33	94	1	12662	LOC100232471
GO:BP	ribonucleoside monophosphate metabolic process	GO:0009161	0.670488	0.173609	33	94	1	12662	ADK
GO:BP	regulation of telomere maintenance via telomerase	GO:0032210	0.670488	0.173609	33	94	1	12662	STN1
GO:BP	regulation of ATPase activity	GO:0043462	0.670488	0.173609	33	94	1	12662	PPIF
HP	Abnormal cardiac ventricular function	HP:0030872	0.672347	0.172407	62	94	1	12662	LDB3
HP	Abnormal eye morphology	HP:0012372	0.672347	0.172407	1685	94	14	12662	ADK,BLNK,ENTPD1,EXOSC3,FAM149B1,FAS,KCNMA1,KIF11,LOC100232471,POLR3A,RBP3,STN1,SUFU,TUBGCP2
HP	Hypogonadism	HP:0000135	0.672347	0.172407	292	94	3	12662	POLR3A,RBP3,SUFU
HP	Glucose intolerance	HP:0001952	0.672347	0.172407	293	94	3	12662	POLR3A,RBP3,SUFU
HP	Mitral valve prolapse	HP:0001634	0.672347	0.172407	62	94	1	12662	BICC1
HP	Wide anterior fontanel	HP:0000260	0.672347	0.172407	62	94	1	12662	SUFU
HP	Generalized tonic seizure	HP:0010818	0.672347	0.172407	62	94	1	12662	SLC25A22
HP	Abnormal lymphocyte physiology	HP:0031409	0.672347	0.172407	174	94	2	12662	BLNK,FAS
HP	Photophobia	HP:0000613	0.672347	0.172407	173	94	2	12662	FAS,RBP3
HP	Abnormality of cardiovascular system morphology	HP:0030680	0.672732	0.172158	1173	94	10	12662	ADK,BICC1,FAM149B1,FAS,KIF11,LDB3,LOC100232471,POLR3A,SLC25A22,SUFU
HP	Abnormality of male external genitalia	HP:0000032	0.672732	0.172158	791	94	7	12662	FAM149B1,FAS,NANOS1,POLR3A,RBP3,SLC25A22,SUFU
GO:MF	lipase activity	GO:0016298	0.674055	0.171304	60	94	1	12662	LOC100231740
GO:MF	carboxylic ester hydrolase activity	GO:0052689	0.674055	0.171304	60	94	1	12662	LOC100231740
HP	Abnormality of lower lip	HP:0000178	0.6743	0.171147	175	94	2	12662	KCNMA1,KIF11
HP	Otitis media	HP:0000388	0.6743	0.171147	175	94	2	12662	BLNK,POLR3A
HP	Amblyopia	HP:0000646	0.675354	0.170468	63	94	1	12662	KIF11
HP	Gynecomastia	HP:0000771	0.675354	0.170468	63	94	1	12662	POLR3A
GO:MF	catalytic activity	GO:0003824	0.675755	0.170211	3643	94	29	12662	ADK,ADO,CH25H,CSGALNACT2,ENO4,ENTPD1,FUT11,IDE,KIF11,LOC100190507,LOC100229828,LOC100231740,LOC100232471,LOC100232794,LOC105759360,MSRA,OGDHL,PAPSS2,POLL,POLR3A,PPIF,PYROXD2,RBP3,SESN2,STAMBPL1,TLL2,XPNPEP1,ZDHHC6,ZNF488
GO:BP	monosaccharide biosynthetic process	GO:0046364	0.675887	0.170126	34	94	1	12662	SESN2
GO:BP	heart looping	GO:0001947	0.675887	0.170126	34	94	1	12662	SUFU
GO:BP	somatic recombination of immunoglobulin gene segments	GO:0016447	0.675887	0.170126	34	94	1	12662	SHLD2
GO:BP	ATP metabolic process	GO:0046034	0.675887	0.170126	119	94	2	12662	ENO4,PPIF
GO:BP	cellular response to DNA damage stimulus	GO:0006974	0.675887	0.170126	437	94	5	12662	MMS19,POLL,SESN2,SFR1,SHLD2
GO:BP	protein homotetramerization	GO:0051289	0.675887	0.170126	34	94	1	12662	PKD2L1
GO:BP	organelle transport along microtubule	GO:0072384	0.675887	0.170126	34	94	1	12662	AP3M1
GO:BP	negative regulation of mononuclear cell proliferation	GO:0032945	0.675887	0.170126	34	94	1	12662	DLG5
GO:BP	negative regulation of lymphocyte proliferation	GO:0050672	0.675887	0.170126	34	94	1	12662	DLG5
HP	Abnormality of the thyroid gland	HP:0000820	0.677557	0.169054	296	94	3	12662	FAS,POLR3A,SUFU
HP	Abnormal respiratory system physiology	HP:0002795	0.677557	0.169054	922	94	8	12662	ANXA11,BLNK,EXOSC3,FAM149B1,FAS,LOC100232471,STN1,SUFU
GO:BP	regulation of systemic arterial blood pressure	GO:0003073	0.678136	0.168683	35	94	1	12662	ADRB1
GO:BP	mitotic spindle assembly	GO:0090307	0.678136	0.168683	35	94	1	12662	KIF11
GO:BP	regulation of GTPase activity	GO:0043087	0.678136	0.168683	223	94	3	12662	ADRB1,ARHGAP22,LOC100222268
GO:BP	glucose import	GO:0046323	0.678136	0.168683	35	94	1	12662	SESN2
GO:BP	determination of heart left/right asymmetry	GO:0061371	0.678136	0.168683	35	94	1	12662	SUFU
GO:BP	proteoglycan biosynthetic process	GO:0030166	0.678136	0.168683	35	94	1	12662	CSGALNACT2
GO:BP	negative regulation of leukocyte proliferation	GO:0070664	0.678136	0.168683	35	94	1	12662	DLG5
GO:BP	membrane docking	GO:0022406	0.678136	0.168683	35	94	1	12662	EXOC6
GO:BP	ventral spinal cord development	GO:0021517	0.678136	0.168683	35	94	1	12662	SUFU
GO:BP	dicarboxylic acid transport	GO:0006835	0.678136	0.168683	35	94	1	12662	SLC25A22
HP	Abnormality of the lower limb	HP:0002814	0.678162	0.168667	1179	94	10	12662	ADK,BMS1,ENTPD1,EXOSC3,FAM149B1,LDB3,PAPSS2,POLR3A,SLC25A22,SUFU
HP	Sepsis	HP:0100806	0.678716	0.168312	64	94	1	12662	BLNK
HP	Intention tremor	HP:0002080	0.678716	0.168312	64	94	1	12662	POLR3A
HP	Hypertrophic cardiomyopathy	HP:0001639	0.678716	0.168312	177	94	2	12662	LOC100232471,SUFU
HP	Malignant neoplasm of the central nervous system	HP:0100836	0.678716	0.168312	64	94	1	12662	SUFU
HP	Neurodegeneration	HP:0002180	0.679844	0.167591	65	94	1	12662	ANXA11
HP	Intellectual disability, moderate	HP:0002342	0.679844	0.167591	179	94	2	12662	ENTPD1,POLR3A
HP	Fasciculations	HP:0002380	0.679844	0.167591	65	94	1	12662	EXOSC3
HP	Clinical course	HP:0031797	0.679844	0.167591	1184	94	10	12662	ADK,BICC1,BLNK,EXOSC3,KCNMA1,LDB3,POLR3A,SLC25A22,SUFU,TUBGCP2
HP	Abnormal circulating proteinogenic amino acid concentration	HP:0033107	0.679844	0.167591	65	94	1	12662	ADK
HP	Progressive visual loss	HP:0000529	0.679844	0.167591	65	94	1	12662	SUFU
HP	Toe syndactyly	HP:0001770	0.679844	0.167591	179	94	2	12662	BMS1,POLR3A
HP	Abnormal cerebellum morphology	HP:0001317	0.679844	0.167591	672	94	6	12662	EXOSC3,FAM149B1,KCNMA1,POLR3A,SLC25A22,SUFU
HP	Limb-girdle muscle weakness	HP:0003325	0.679844	0.167591	65	94	1	12662	LDB3
HP	Foot dorsiflexor weakness	HP:0009027	0.679844	0.167591	65	94	1	12662	LDB3
HP	Cerebellar hypoplasia	HP:0001321	0.680586	0.167117	300	94	3	12662	FAM149B1,POLR3A,SUFU
HP	Abnormal visual electrophysiology	HP:0030453	0.681687	0.166415	180	94	2	12662	RBP3,SLC25A22
HP	Abnormality of the metencephalon	HP:0011283	0.681687	0.166415	676	94	6	12662	EXOSC3,FAM149B1,KCNMA1,POLR3A,SLC25A22,SUFU
HP	Abnormality of hindbrain morphology	HP:0011282	0.681687	0.166415	676	94	6	12662	EXOSC3,FAM149B1,KCNMA1,POLR3A,SLC25A22,SUFU
HP	Neoplasm of the breast	HP:0100013	0.681854	0.166309	67	94	1	12662	FAS
HP	Skin tags	HP:0010609	0.681854	0.166309	67	94	1	12662	SUFU
HP	Congenital diaphragmatic hernia	HP:0000776	0.681854	0.166309	66	94	1	12662	SUFU
HP	External ear malformation	HP:0008572	0.681854	0.166309	67	94	1	12662	BLNK
HP	Abnormal duodenum morphology	HP:0002246	0.681854	0.166309	66	94	1	12662	SUFU
HP	Aplasia/Hypoplasia involving the central nervous system	HP:0002977	0.681854	0.166309	1321	94	11	12662	ADK,ENTPD1,EXOSC3,FAM149B1,KCNMA1,KIF11,LOC100232471,POLR3A,SLC25A22,SUFU,TUBGCP2
HP	Abnormal ilium morphology	HP:0002867	0.681854	0.166309	66	94	1	12662	POLR3A
HP	Short digit	HP:0011927	0.681854	0.166309	427	94	4	12662	FAM149B1,PAPSS2,SLC25A22,SUFU
HP	Abnormal circulating dicarboxylic acid concentration	HP:0010995	0.681854	0.166309	67	94	1	12662	ADK
HP	Gastrointestinal inflammation	HP:0004386	0.681854	0.166309	67	94	1	12662	FAS
HP	Microcephaly	HP:0000252	0.681854	0.166309	934	94	8	12662	ENTPD1,EXOSC3,KCNMA1,KIF11,LOC100232471,SLC25A22,SUFU,TUBGCP2
HP	Abnormal testis morphology	HP:0000035	0.681854	0.166309	679	94	6	12662	FAM149B1,FAS,NANOS1,POLR3A,RBP3,SUFU
HP	Corneal opacity	HP:0007957	0.681854	0.166309	182	94	2	12662	KIF11,POLR3A
HP	Sudden death	HP:0001699	0.681854	0.166309	67	94	1	12662	LDB3
HP	Progressive night blindness	HP:0007675	0.681854	0.166309	67	94	1	12662	RBP3
HP	Weakness of facial musculature	HP:0030319	0.681854	0.166309	182	94	2	12662	BMS1,SUFU
GO:CC	intrinsic component of mitochondrial inner membrane	GO:0031304	0.682888	0.165651	24	94	1	12662	GHITM
GO:CC	integral component of mitochondrial inner membrane	GO:0031305	0.682888	0.165651	24	94	1	12662	GHITM
HP	Abnormality of the ovary	HP:0000137	0.68412	0.164868	184	94	2	12662	FAS,SUFU
HP	Severe short stature	HP:0003510	0.68412	0.164868	68	94	1	12662	KIF11
HP	Abnormal nasal morphology	HP:0005105	0.68412	0.164868	939	94	8	12662	FAM149B1,KCNMA1,KIF11,POLR3A,RBP3,SLC25A22,SUFU,TUBGCP2
HP	Polydactyly	HP:0010442	0.68412	0.164868	184	94	2	12662	FAM149B1,SUFU
HP	Abnormality of facial soft tissue	HP:0011799	0.68412	0.164868	306	94	3	12662	BMS1,POLR3A,SUFU
HP	Hyperlipidemia	HP:0003077	0.68412	0.164868	68	94	1	12662	POLR3A
HP	Hydrops fetalis	HP:0001789	0.68412	0.164868	68	94	1	12662	FAS
HP	Abnormal urinary electrolyte concentration	HP:0012591	0.68412	0.164868	68	94	1	12662	BICC1
HP	Osteopenia	HP:0000938	0.685103	0.164244	185	94	2	12662	POLR3A,STN1
HP	Hematological neoplasm	HP:0004377	0.685103	0.164244	188	94	2	12662	FAS,KIF11
HP	Tented upper lip vermilion	HP:0010804	0.685103	0.164244	70	94	1	12662	SUFU
HP	Exertional dyspnea	HP:0002875	0.685103	0.164244	71	94	1	12662	STN1
HP	Functional abnormality of the bladder	HP:0000009	0.685103	0.164244	313	94	3	12662	BICC1,POLR3A,SUFU
HP	Ventricular arrhythmia	HP:0004308	0.685103	0.164244	70	94	1	12662	LDB3
HP	Cerebral ischemia	HP:0002637	0.685103	0.164244	71	94	1	12662	FAS
HP	Choreoathetosis	HP:0001266	0.685103	0.164244	70	94	1	12662	SLC25A22
HP	Syncope	HP:0001279	0.685103	0.164244	71	94	1	12662	SUFU
HP	Abnormal shoulder morphology	HP:0003043	0.685103	0.164244	71	94	1	12662	SUFU
HP	Asthma	HP:0002099	0.685103	0.164244	69	94	1	12662	SUFU
HP	Failure to thrive	HP:0001508	0.685103	0.164244	688	94	6	12662	ADK,BLNK,FAM149B1,LOC100232471,POLR3A,SLC25A22
HP	Abnormal sputum	HP:0032016	0.685103	0.164244	70	94	1	12662	FAS
HP	Abnormal left ventricle morphology	HP:0001711	0.685103	0.164244	69	94	1	12662	LDB3
HP	Functional abnormality of the inner ear	HP:0011389	0.685103	0.164244	686	94	6	12662	ADK,FAM149B1,FAS,LDB3,RBP3,SUFU
HP	Abnormality of the male genitalia	HP:0010461	0.685103	0.164244	814	94	7	12662	FAM149B1,FAS,NANOS1,POLR3A,RBP3,SLC25A22,SUFU
HP	Peripheral neuropathy	HP:0009830	0.685103	0.164244	439	94	4	12662	FAS,LDB3,LOC100232471,POLR3A
HP	Tissue ischemia	HP:0033401	0.685103	0.164244	71	94	1	12662	FAS
HP	Abnormality of the musculature	HP:0003011	0.685103	0.164244	1990	94	16	12662	ADK,ANXA11,BMS1,ENTPD1,EXOSC3,FAM149B1,FAS,KCNMA1,KIF11,LDB3,LOC100232471,POLR3A,SLC25A22,STN1,SUFU,TUBGCP2
HP	Progressive cerebellar ataxia	HP:0002073	0.685103	0.164244	70	94	1	12662	LOC100232471
HP	Vertigo	HP:0002321	0.685103	0.164244	69	94	1	12662	FAS
HP	Abnormality of the musculature of the hand	HP:0001421	0.685103	0.164244	71	94	1	12662	LDB3
HP	Blue sclerae	HP:0000592	0.685103	0.164244	69	94	1	12662	POLR3A
HP	Focal motor seizure	HP:0011153	0.685103	0.164244	70	94	1	12662	SLC25A22
HP	Abnormal ovarian physiology	HP:0031066	0.685103	0.164244	70	94	1	12662	FAS
HP	Decreased head circumference	HP:0040195	0.685103	0.164244	945	94	8	12662	ENTPD1,EXOSC3,KCNMA1,KIF11,LOC100232471,SLC25A22,SUFU,TUBGCP2
HP	Abnormal external genitalia	HP:0000811	0.685103	0.164244	822	94	7	12662	FAM149B1,FAS,NANOS1,POLR3A,RBP3,SLC25A22,SUFU
HP	Nephrolithiasis	HP:0000787	0.685103	0.164244	71	94	1	12662	BICC1
HP	Aplasia/Hypoplasia of the optic nerve	HP:0008058	0.685103	0.164244	71	94	1	12662	POLR3A
HP	Abnormality of the menstrual cycle	HP:0000140	0.685103	0.164244	188	94	2	12662	PAPSS2,SUFU
HP	Hypopigmentation of hair	HP:0005599	0.685103	0.164244	71	94	1	12662	FAS
HP	Kinetic tremor	HP:0030186	0.685103	0.164244	70	94	1	12662	POLR3A
HP	Abnormality of the inner ear	HP:0000359	0.686173	0.163566	695	94	6	12662	ADK,FAM149B1,FAS,LDB3,RBP3,SUFU
HP	Infantile spasms	HP:0012469	0.686905	0.163103	72	94	1	12662	SLC25A22
HP	Abnormality of the abdominal organs	HP:0002012	0.686905	0.163103	826	94	7	12662	ADK,BICC1,BLNK,FAS,LOC100232471,POLR3A,STN1
HP	Tonic seizure	HP:0032792	0.686905	0.163103	72	94	1	12662	SLC25A22
HP	Abnormality of the nail	HP:0001597	0.686905	0.163103	315	94	3	12662	KIF11,POLR3A,SLC25A22
HP	Postaxial hand polydactyly	HP:0001162	0.686905	0.163103	72	94	1	12662	SUFU
HP	Abnormality of earlobe	HP:0000363	0.686905	0.163103	72	94	1	12662	POLR3A
HP	Abnormal renal morphology	HP:0012210	0.686905	0.163103	697	94	6	12662	BICC1,FAM149B1,FAS,POLR3A,SLC25A22,SUFU
GO:BP	negative regulation of transporter activity	GO:0032410	0.687613	0.162656	36	94	1	12662	PPIF
GO:BP	cellular response to amino acid stimulus	GO:0071230	0.687613	0.162656	36	94	1	12662	SESN2
GO:BP	fatty acid beta-oxidation	GO:0006635	0.687613	0.162656	36	94	1	12662	SESN2
GO:BP	protein localization to cilium	GO:0061512	0.687613	0.162656	36	94	1	12662	FAM149B1
GO:BP	lung morphogenesis	GO:0060425	0.687613	0.162656	36	94	1	12662	DLG5
HP	EMG abnormality	HP:0003457	0.688095	0.162352	192	94	2	12662	LDB3,SUFU
HP	Adrenal insufficiency	HP:0000846	0.688095	0.162352	73	94	1	12662	SUFU
HP	Abnormality of the pancreas	HP:0001732	0.688095	0.162352	192	94	2	12662	BICC1,FAS
HP	Abnormal breath sound	HP:0030829	0.688095	0.162352	73	94	1	12662	STN1
HP	Abnormal pancreas morphology	HP:0012090	0.688095	0.162352	73	94	1	12662	BICC1
HP	Stage 5 chronic kidney disease	HP:0003774	0.688095	0.162352	73	94	1	12662	BICC1
HP	Long fingers	HP:0100807	0.688095	0.162352	192	94	2	12662	POLR3A,SUFU
HP	2-3 toe syndactyly	HP:0004691	0.688095	0.162352	73	94	1	12662	POLR3A
HP	Dyskinesia	HP:0100660	0.688095	0.162352	192	94	2	12662	KCNMA1,SLC25A22
HP	Polymicrogyria	HP:0002126	0.689213	0.161647	194	94	2	12662	POLR3A,SUFU
HP	Skin rash	HP:0000988	0.689213	0.161647	74	94	1	12662	BLNK
HP	Chorea	HP:0002072	0.689213	0.161647	194	94	2	12662	KCNMA1,SLC25A22
HP	Abnormality of the musculature of the lower limbs	HP:0001437	0.689213	0.161647	74	94	1	12662	LDB3
HP	Aplasia/Hypoplasia affecting the eye	HP:0008056	0.689213	0.161647	319	94	3	12662	KIF11,POLR3A,SUFU
HP	Abnormal stomach morphology	HP:0002577	0.689213	0.161647	194	94	2	12662	FAS,SUFU
HP	Brain atrophy	HP:0012444	0.689213	0.161647	574	94	5	12662	ADK,EXOSC3,KCNMA1,POLR3A,SLC25A22
HP	Paresthesia	HP:0003401	0.689213	0.161647	74	94	1	12662	FAS
HP	Abnormality of the supraorbital ridges	HP:0100538	0.689213	0.161647	74	94	1	12662	KIF11
GO:BP	cation transmembrane transport	GO:0098655	0.689239	0.16163	446	94	5	12662	KCNMA1,LOC100190507,PKD2L1,PPIF,SLC35G1
HP	Limb muscle weakness	HP:0003690	0.690904	0.160582	195	94	2	12662	LDB3,SUFU
GO:BP	regulation of ATP metabolic process	GO:1903578	0.69129	0.16034	37	94	1	12662	PPIF
GO:BP	central nervous system neuron differentiation	GO:0021953	0.69129	0.16034	126	94	2	12662	NANOS1,SUFU
GO:BP	lymphocyte migration	GO:0072676	0.69129	0.16034	37	94	1	12662	CH25H
GO:BP	aorta development	GO:0035904	0.69129	0.16034	37	94	1	12662	SUFU
GO:BP	regulation of telomere maintenance via telomere lengthening	GO:1904356	0.69129	0.16034	37	94	1	12662	STN1
GO:BP	somatic diversification of immunoglobulins	GO:0016445	0.69129	0.16034	37	94	1	12662	SHLD2
GO:BP	peptide metabolic process	GO:0006518	0.69129	0.16034	449	94	5	12662	IDE,NANOS1,RPS24,SESN2,XPNPEP1
GO:BP	embryonic heart tube morphogenesis	GO:0003143	0.69129	0.16034	37	94	1	12662	SUFU
GO:MF	exopeptidase activity	GO:0008238	0.691725	0.160066	63	94	1	12662	XPNPEP1
HP	Wide nose	HP:0000445	0.692879	0.159342	75	94	1	12662	KIF11
HP	Abnormal corneal epithelium morphology	HP:0011495	0.692879	0.159342	75	94	1	12662	FAS
HP	EEG with generalized epileptiform discharges	HP:0011198	0.692879	0.159342	196	94	2	12662	KCNMA1,SLC25A22
HP	Heart block	HP:0012722	0.692879	0.159342	75	94	1	12662	LDB3
GO:BP	multicellular organismal response to stress	GO:0033555	0.693327	0.159062	38	94	1	12662	ADRB1
GO:BP	positive regulation of macroautophagy	GO:0016239	0.693327	0.159062	38	94	1	12662	SESN2
GO:BP	cell differentiation in spinal cord	GO:0021515	0.693327	0.159062	38	94	1	12662	SUFU
GO:BP	cellular response to hydrogen peroxide	GO:0070301	0.693327	0.159062	38	94	1	12662	PPIF
GO:BP	lamellipodium assembly	GO:0030032	0.693327	0.159062	38	94	1	12662	ABLIM1
GO:BP	pigment metabolic process	GO:0042440	0.693327	0.159062	38	94	1	12662	LOC100232471
GO:BP	nucleoside triphosphate biosynthetic process	GO:0009142	0.693327	0.159062	38	94	1	12662	ADK
GO:BP	adenylate cyclase-activating G protein-coupled receptor signaling pathway	GO:0007189	0.693327	0.159062	38	94	1	12662	ADRB1
GO:BP	regulation of postsynapse organization	GO:0099175	0.693327	0.159062	38	94	1	12662	ARHGAP22
GO:BP	glycosyl compound metabolic process	GO:1901657	0.693327	0.159062	38	94	1	12662	ADK
HP	Abnormal vertebral morphology	HP:0003468	0.69472	0.15819	323	94	3	12662	PAPSS2,POLR3A,SUFU
HP	Neoplasm of the gastrointestinal tract	HP:0007378	0.69472	0.15819	197	94	2	12662	FAS,SUFU
HP	Microphthalmia	HP:0000568	0.69472	0.15819	197	94	2	12662	KIF11,SUFU
HP	Abnormality of the philtrum	HP:0000288	0.69503	0.157997	452	94	4	12662	KIF11,POLR3A,SUFU,TUBGCP2
HP	Short thumb	HP:0009778	0.69503	0.157997	77	94	1	12662	SUFU
HP	Febrile seizure (within the age range of 3 months to 6 years)	HP:0002373	0.69503	0.157997	77	94	1	12662	SLC25A22
HP	Nausea and vomiting	HP:0002017	0.69503	0.157997	326	94	3	12662	ANXA11,FAS,SUFU
HP	Cleft palate	HP:0000175	0.69503	0.157997	454	94	4	12662	FAM149B1,POLR3A,SLC25A22,SUFU
HP	Unusual infection	HP:0032101	0.69503	0.157997	582	94	5	12662	BICC1,BLNK,FAS,POLR3A,SLC25A22
HP	Migraine	HP:0002076	0.69503	0.157997	77	94	1	12662	FAS
HP	Abnormal cardiac septum morphology	HP:0001671	0.69503	0.157997	455	94	4	12662	ADK,KIF11,LOC100232471,SLC25A22
HP	Abnormal cerebral vascular morphology	HP:0100659	0.69503	0.157997	198	94	2	12662	BICC1,SUFU
HP	Atonic seizure	HP:0010819	0.69503	0.157997	77	94	1	12662	SLC25A22
HP	Abnormal skull morphology	HP:0000929	0.69503	0.157997	1632	94	13	12662	ADK,BLNK,BMS1,ENTPD1,EXOSC3,FAM149B1,KCNMA1,KIF11,LOC100232471,POLR3A,SLC25A22,SUFU,TUBGCP2
HP	Poor suck	HP:0002033	0.69503	0.157997	77	94	1	12662	SLC25A22
HP	Abnormality of the sense of smell	HP:0004408	0.69503	0.157997	76	94	1	12662	SUFU
HP	Abnormal hard palate morphology	HP:0100737	0.69503	0.157997	455	94	4	12662	FAM149B1,POLR3A,SLC25A22,SUFU
HP	Seizure precipitated by febrile infection	HP:0032894	0.69503	0.157997	77	94	1	12662	SLC25A22
HP	Infection-related seizure	HP:0032892	0.69503	0.157997	77	94	1	12662	SLC25A22
HP	Abnormal CSF metabolite level	HP:0025454	0.69503	0.157997	77	94	1	12662	LOC100232471
GO:BP	negative regulation of response to stimulus	GO:0048585	0.695052	0.157983	806	94	8	12662	BICC1,DLG5,GHITM,PPIF,RTKN2,SESN2,SHLD2,SUFU
GO:BP	cellular response to oxidative stress	GO:0034599	0.695052	0.157983	129	94	2	12662	PPIF,SESN2
GO:BP	peptidyl-proline modification	GO:0018208	0.69517	0.157909	39	94	1	12662	PPIF
GO:BP	RNA-dependent DNA biosynthetic process	GO:0006278	0.69517	0.157909	39	94	1	12662	STN1
GO:BP	positive regulation of B cell activation	GO:0050871	0.69517	0.157909	39	94	1	12662	SHLD2
GO:BP	potassium ion transport	GO:0006813	0.69517	0.157909	130	94	2	12662	KCNMA1,PKD2L1
GO:BP	negative regulation of cation transmembrane transport	GO:1904063	0.69517	0.157909	39	94	1	12662	PPIF
GO:BP	cellular response to acid chemical	GO:0071229	0.69517	0.157909	39	94	1	12662	SESN2
GO:BP	negative regulation of proteolysis involved in cellular protein catabolic process	GO:1903051	0.69517	0.157909	39	94	1	12662	SUFU
GO:BP	telomere maintenance via telomerase	GO:0007004	0.69517	0.157909	39	94	1	12662	STN1
GO:BP	negative regulation of cell migration	GO:0030336	0.695392	0.15777	131	94	2	12662	DLG5,NRG3
GO:BP	response to amino acid	GO:0043200	0.695392	0.15777	40	94	1	12662	SESN2
GO:BP	DNA damage response, signal transduction by p53 class mediator	GO:0030330	0.695392	0.15777	40	94	1	12662	SESN2
GO:BP	negative regulation of response to DNA damage stimulus	GO:2001021	0.695392	0.15777	40	94	1	12662	SHLD2
GO:BP	cellular monovalent inorganic cation homeostasis	GO:0030004	0.695392	0.15777	40	94	1	12662	KCNMA1
GO:BP	selective autophagy	GO:0061912	0.695392	0.15777	40	94	1	12662	SESN2
GO:BP	positive regulation of adaptive immune response based on somatic recombination of immune receptors built from immunoglobulin superfamily domains	GO:0002824	0.695392	0.15777	40	94	1	12662	SHLD2
GO:BP	positive regulation of lymphocyte mediated immunity	GO:0002708	0.695392	0.15777	40	94	1	12662	SHLD2
GO:BP	telencephalon cell migration	GO:0022029	0.695392	0.15777	40	94	1	12662	NRG3
GO:BP	ion transmembrane transport	GO:0034220	0.695392	0.15777	578	94	6	12662	KCNMA1,LOC100190507,PKD2L1,PPIF,SLC25A22,SLC35G1
GO:BP	renal system process	GO:0003014	0.695392	0.15777	40	94	1	12662	KCNMA1
GO:BP	positive regulation of synapse assembly	GO:0051965	0.695392	0.15777	40	94	1	12662	DLG5
GO:MF	calcium channel activity	GO:0005262	0.695393	0.15777	64	94	1	12662	PKD2L1
GO:MF	hydrolase activity	GO:0016787	0.695393	0.15777	1441	94	12	12662	ENTPD1,IDE,KIF11,LOC100190507,LOC100229828,LOC100231740,LOC100232794,LOC105759360,RBP3,STAMBPL1,TLL2,XPNPEP1
GO:MF	voltage-gated potassium channel activity	GO:0005249	0.695711	0.157571	65	94	1	12662	KCNMA1
GO:CC	AP-type membrane coat adaptor complex	GO:0030119	0.69718	0.156655	25	94	1	12662	AP3M1
GO:BP	regulation of carbohydrate biosynthetic process	GO:0043255	0.698319	0.155946	41	94	1	12662	SESN2
GO:BP	somatic diversification of immune receptors via germline recombination within a single locus	GO:0002562	0.698319	0.155946	41	94	1	12662	SHLD2
GO:BP	forebrain cell migration	GO:0021885	0.698319	0.155946	41	94	1	12662	NRG3
GO:BP	purine nucleoside triphosphate metabolic process	GO:0009144	0.698319	0.155946	41	94	1	12662	ADK
GO:BP	somatic cell DNA recombination	GO:0016444	0.698319	0.155946	41	94	1	12662	SHLD2
GO:BP	growth	GO:0040007	0.698319	0.155946	464	94	5	12662	ADRB1,KAZALD1,NANOS1,SESN2,TLL2
GO:BP	negative regulation of ion transmembrane transport	GO:0034766	0.698319	0.155946	41	94	1	12662	PPIF
GO:BP	regulation of NIK/NF-kappaB signaling	GO:1901222	0.698319	0.155946	41	94	1	12662	RTKN2
GO:BP	negative regulation of cell communication	GO:0010648	0.698572	0.155789	701	94	7	12662	BICC1,DLG5,GHITM,PPIF,RTKN2,SESN2,SUFU
HP	Abnormal foot morphology	HP:0001760	0.698589	0.155778	978	94	8	12662	ADK,BMS1,ENTPD1,EXOSC3,FAM149B1,POLR3A,SLC25A22,SUFU
HP	Large face	HP:0100729	0.698589	0.155778	201	94	2	12662	FAM149B1,SUFU
GO:BP	brain development	GO:0007420	0.700183	0.154789	352	94	4	12662	DLG5,NANOS1,NRG3,TUBGCP2
HP	Abnormality of the calvaria	HP:0002683	0.700279	0.154729	718	94	6	12662	ADK,BMS1,FAM149B1,KIF11,POLR3A,SUFU
HP	Abnormal lung morphology	HP:0002088	0.700279	0.154729	718	94	6	12662	BLNK,FAS,KIF11,POLR3A,SLC25A22,STN1
HP	Abnormality of immune system physiology	HP:0010978	0.700279	0.154729	980	94	8	12662	BICC1,BLNK,FAS,KIF11,PAPSS2,POLR3A,SLC25A22,SUFU
GO:BP	negative regulation of signaling	GO:0023057	0.700945	0.154316	704	94	7	12662	BICC1,DLG5,GHITM,PPIF,RTKN2,SESN2,SUFU
GO:BP	dendritic spine development	GO:0060996	0.700945	0.154316	42	94	1	12662	DLG5
GO:BP	amino acid transmembrane transport	GO:0003333	0.700945	0.154316	42	94	1	12662	SLC25A22
GO:BP	microtubule polymerization	GO:0046785	0.700945	0.154316	42	94	1	12662	TUBGCP2
GO:BP	response to nutrient levels	GO:0031667	0.700945	0.154316	136	94	2	12662	ADRB1,SESN2
GO:BP	positive regulation of adaptive immune response	GO:0002821	0.700945	0.154316	42	94	1	12662	SHLD2
GO:BP	positive regulation of cold-induced thermogenesis	GO:0120162	0.700945	0.154316	42	94	1	12662	ADRB1
HP	Abnormal upper limb bone morphology	HP:0040070	0.701617	0.1539	330	94	3	12662	FAM149B1,POLR3A,SUFU
HP	Abnormal cranial nerve morphology	HP:0001291	0.703013	0.153037	203	94	2	12662	BMS1,SUFU
GO:BP	DNA replication	GO:0006260	0.703441	0.152773	137	94	2	12662	POLL,STN1
GO:MF	carboxylic acid transmembrane transporter activity	GO:0046943	0.703833	0.15253	69	94	1	12662	SLC25A22
GO:MF	nuclear receptor binding	GO:0016922	0.703833	0.15253	68	94	1	12662	MMS19
GO:MF	carboxylic acid binding	GO:0031406	0.703833	0.15253	67	94	1	12662	SESN2
GO:MF	ATPase-coupled transmembrane transporter activity	GO:0042626	0.703833	0.15253	69	94	1	12662	LOC100190507
GO:MF	primary active transmembrane transporter activity	GO:0015399	0.703833	0.15253	71	94	1	12662	LOC100190507
GO:MF	tubulin binding	GO:0015631	0.703833	0.15253	188	94	2	12662	KIF11,TUBGCP2
GO:MF	glycosyltransferase activity	GO:0016757	0.703833	0.15253	190	94	2	12662	CSGALNACT2,FUT11
GO:MF	organic acid transmembrane transporter activity	GO:0005342	0.703833	0.15253	70	94	1	12662	SLC25A22
GO:MF	protein domain specific binding	GO:0019904	0.703833	0.15253	315	94	3	12662	ADRB1,BLNK,TFDP2
GO:MF	proton transmembrane transporter activity	GO:0015078	0.703833	0.15253	71	94	1	12662	LOC100190507
GO:MF	motor activity	GO:0003774	0.703833	0.15253	69	94	1	12662	KIF11
GO:BP	negative regulation of cell motility	GO:2000146	0.704667	0.152016	138	94	2	12662	DLG5,NRG3
GO:BP	glycolytic process	GO:0006096	0.704667	0.152016	43	94	1	12662	ENO4
GO:BP	embryonic heart tube development	GO:0035050	0.704667	0.152016	43	94	1	12662	SUFU
GO:BP	regulation of multicellular organism growth	GO:0040014	0.704667	0.152016	43	94	1	12662	ADRB1
GO:BP	central nervous system development	GO:0007417	0.704667	0.152016	471	94	5	12662	DLG5,NANOS1,NRG3,SUFU,TUBGCP2
GO:BP	positive regulation of production of molecular mediator of immune response	GO:0002702	0.704667	0.152016	43	94	1	12662	SHLD2
GO:BP	positive regulation of leukocyte mediated immunity	GO:0002705	0.704667	0.152016	43	94	1	12662	SHLD2
GO:MF	phosphatase activity	GO:0016791	0.704771	0.151952	192	94	2	12662	LOC100232794,LOC105759360
HP	Thoracic aortic aneurysm	HP:0012727	0.70507	0.151768	80	94	1	12662	BICC1
HP	Abnormal skeletal muscle morphology	HP:0011805	0.70507	0.151768	1249	94	10	12662	ADK,ANXA11,BMS1,ENTPD1,EXOSC3,FAS,KCNMA1,LDB3,POLR3A,SUFU
HP	Ventricular hypertrophy	HP:0001714	0.70507	0.151768	80	94	1	12662	LDB3
HP	Gingival overgrowth	HP:0000212	0.70507	0.151768	80	94	1	12662	KCNMA1
HP	Abnormality of the diaphragm	HP:0000775	0.70507	0.151768	80	94	1	12662	SUFU
HP	Gonadal neoplasm	HP:0010785	0.70507	0.151768	80	94	1	12662	SUFU
HP	Kyphosis	HP:0002808	0.705626	0.151426	333	94	3	12662	PAPSS2,POLR3A,SUFU
GO:CC	postsynaptic specialization	GO:0099572	0.70741	0.150329	123	94	2	12662	DLG5,PSD
GO:CC	proton-transporting two-sector ATPase complex	GO:0016469	0.70741	0.150329	35	94	1	12662	LOC100190507
GO:CC	stress fiber	GO:0001725	0.70741	0.150329	33	94	1	12662	ABLIM1
GO:CC	cell projection membrane	GO:0031253	0.70741	0.150329	119	94	2	12662	LOC100218935,PSD
GO:CC	postsynaptic density	GO:0014069	0.70741	0.150329	108	94	2	12662	DLG5,PSD
GO:CC	cell-cell contact zone	GO:0044291	0.70741	0.150329	34	94	1	12662	NRAP
GO:CC	extrinsic component of organelle membrane	GO:0031312	0.70741	0.150329	27	94	1	12662	PSD
GO:CC	neuron to neuron synapse	GO:0098984	0.70741	0.150329	122	94	2	12662	DLG5,PSD
GO:CC	cell division site	GO:0032153	0.70741	0.150329	30	94	1	12662	PSD
GO:CC	cleavage furrow	GO:0032154	0.70741	0.150329	28	94	1	12662	PSD
GO:CC	transferase complex, transferring phosphorus-containing groups	GO:0061695	0.70741	0.150329	122	94	2	12662	POLR3A,SESN2
GO:CC	asymmetric synapse	GO:0032279	0.70741	0.150329	108	94	2	12662	DLG5,PSD
GO:CC	vesicle coat	GO:0030120	0.70741	0.150329	31	94	1	12662	SEC31B
GO:CC	vesicle membrane	GO:0012506	0.70741	0.150329	312	94	4	12662	AP3M1,MYOF,PSD,SEC31B
GO:CC	SCF ubiquitin ligase complex	GO:0019005	0.70741	0.150329	26	94	1	12662	FBXL15
GO:CC	site of double-strand break	GO:0035861	0.70741	0.150329	34	94	1	12662	SHLD2
GO:CC	spindle microtubule	GO:0005876	0.70741	0.150329	32	94	1	12662	KIF11
GO:CC	contractile actin filament bundle	GO:0097517	0.70741	0.150329	33	94	1	12662	ABLIM1
GO:CC	calcium channel complex	GO:0034704	0.70741	0.150329	33	94	1	12662	PKD2L1
GO:CC	cation channel complex	GO:0034703	0.70741	0.150329	120	94	2	12662	KCNMA1,PKD2L1
GO:CC	cilium	GO:0005929	0.70741	0.150329	316	94	4	12662	DLG5,ENO4,PKD2L1,SUFU
HP	Aplasia/Hypoplasia of the ribs	HP:0006712	0.707911	0.150022	81	94	1	12662	SUFU
HP	Gliosis	HP:0002171	0.707911	0.150022	81	94	1	12662	LOC100232471
HP	Abnormal oral mucosa morphology	HP:0011830	0.707911	0.150022	206	94	2	12662	FAS,KCNMA1
HP	Vascular skin abnormality	HP:0011276	0.707911	0.150022	334	94	3	12662	FAS,POLR3A,STN1
HP	Abnormal cardiovascular system physiology	HP:0011025	0.707973	0.149983	858	94	7	12662	ADK,BICC1,FAS,LDB3,POLR3A,STN1,SUFU
HP	Hypoplasia of penis	HP:0008736	0.707973	0.149983	335	94	3	12662	RBP3,SLC25A22,SUFU
GO:CC	actin filament bundle	GO:0032432	0.709515	0.149038	37	94	1	12662	ABLIM1
GO:CC	integral component of mitochondrial membrane	GO:0032592	0.709515	0.149038	38	94	1	12662	GHITM
GO:CC	actomyosin	GO:0042641	0.709515	0.149038	38	94	1	12662	ABLIM1
GO:CC	intrinsic component of mitochondrial membrane	GO:0098573	0.709515	0.149038	38	94	1	12662	GHITM
GO:CC	caveola	GO:0005901	0.709515	0.149038	36	94	1	12662	KCNMA1
GO:CC	cellular anatomical entity	GO:0110165	0.709898	0.148804	9515	94	74	12662	ABLIM1,ADK,ADRB1,ANTXRL,ANXA11,AP3M1,ARHGAP22,ATRNL1,BICC1,BLNK,BMS1,CALHM2,CCDC6,CH25H,CNNM1,CSGALNACT2,DLG5,DNAJC18,ENO4,ENTPD1,EXOC6,EXOSC3,FAS,FBXL15,FUT11,GHITM,IDE,KAZALD1,KCNMA1,KIF11,LDB3,LOC100190507,LOC100218935,LOC100229828,LOC100231740,LOC100232471,LRIT1,MFSD13A,MMS19,MSRA,MYOF,NANOS1,NRAP,NRG3,OGDHL,OPN4,PDCD11,PKD2L1,POLL,POLR3A,PPIF,PSD,PYROXD2,RBP3,RPS24,RRP12,RTKN2,SEC31B,SESN2,S…
HP	Strabismus	HP:0000486	0.710224	0.148605	728	94	6	12662	EXOSC3,FAM149B1,KCNMA1,LOC100232471,SLC25A22,SUFU
GO:MF	deubiquitinase activity	GO:0101005	0.710285	0.148567	75	94	1	12662	STAMBPL1
GO:MF	protein kinase binding	GO:0019901	0.710285	0.148567	320	94	3	12662	BLNK,KIF11,SUFU
GO:MF	sodium ion transmembrane transporter activity	GO:0015081	0.710285	0.148567	75	94	1	12662	PKD2L1
HP	Abnormality of globe location	HP:0100886	0.710813	0.148245	729	94	6	12662	ADK,BLNK,FAM149B1,KCNMA1,POLR3A,SUFU
HP	Progressive	HP:0003676	0.710813	0.148245	208	94	2	12662	ADK,POLR3A
HP	Encephalopathy	HP:0001298	0.710813	0.148245	208	94	2	12662	LOC100232471,SLC25A22
HP	Abnormal mitral valve morphology	HP:0001633	0.710813	0.148245	82	94	1	12662	BICC1
HP	Hemolytic anemia	HP:0001878	0.712098	0.14746	83	94	1	12662	FAS
HP	Developmental cataract	HP:0000519	0.712098	0.14746	83	94	1	12662	ENTPD1
HP	Anemia due to reduced life span of red cells	HP:0011895	0.712098	0.14746	83	94	1	12662	FAS
HP	Abnormality of the genital system	HP:0000078	0.712098	0.14746	1127	94	9	12662	BICC1,FAM149B1,FAS,NANOS1,PAPSS2,POLR3A,RBP3,SLC25A22,SUFU
HP	Aplasia/Hypoplasia of the corpus callosum	HP:0007370	0.712098	0.14746	600	94	5	12662	FAM149B1,POLR3A,SLC25A22,SUFU,TUBGCP2
HP	Cardiac conduction abnormality	HP:0031546	0.712098	0.14746	83	94	1	12662	LDB3
HP	Abnormal bone ossification	HP:0011849	0.713111	0.146843	470	94	4	12662	BMS1,POLR3A,STN1,SUFU
GO:BP	type I interferon production	GO:0032606	0.713322	0.146714	44	94	1	12662	POLR3A
GO:BP	ATP generation from ADP	GO:0006757	0.713322	0.146714	44	94	1	12662	ENO4
GO:BP	ventricular septum development	GO:0003281	0.713322	0.146714	44	94	1	12662	SUFU
GO:BP	regulation of type I interferon production	GO:0032479	0.713322	0.146714	44	94	1	12662	POLR3A
GO:BP	neuron fate commitment	GO:0048663	0.714031	0.146283	45	94	1	12662	SUFU
GO:BP	nucleoside monophosphate metabolic process	GO:0009123	0.714031	0.146283	45	94	1	12662	ADK
GO:BP	fatty acid catabolic process	GO:0009062	0.714031	0.146283	45	94	1	12662	SESN2
GO:BP	somatic diversification of immune receptors	GO:0002200	0.714031	0.146283	45	94	1	12662	SHLD2
GO:BP	immunoglobulin mediated immune response	GO:0016064	0.714031	0.146283	45	94	1	12662	SHLD2
GO:BP	B cell mediated immunity	GO:0019724	0.714031	0.146283	45	94	1	12662	SHLD2
GO:BP	triglyceride metabolic process	GO:0006641	0.714031	0.146283	45	94	1	12662	LOC100231740
GO:BP	telomere maintenance via telomere lengthening	GO:0010833	0.714031	0.146283	45	94	1	12662	STN1
GO:BP	pattern specification process	GO:0007389	0.714031	0.146283	250	94	3	12662	BICC1,NRG3,SUFU
GO:BP	protein localization to cell junction	GO:1902414	0.714031	0.146283	45	94	1	12662	DLG5
HP	Recurrent respiratory infections	HP:0002205	0.714393	0.146063	340	94	3	12662	BLNK,POLR3A,SLC25A22
HP	Foot polydactyly	HP:0001829	0.714408	0.146054	84	94	1	12662	FAM149B1
HP	Abnormal sclera morphology	HP:0000591	0.714408	0.146054	84	94	1	12662	POLR3A
HP	Sparse eyebrow	HP:0045075	0.714408	0.146054	84	94	1	12662	POLR3A
HP	Drooling	HP:0002307	0.714408	0.146054	84	94	1	12662	POLR3A
GO:BP	negative regulation of cellular component movement	GO:0051271	0.715921	0.145135	143	94	2	12662	DLG5,NRG3
GO:BP	rhythmic process	GO:0048511	0.715921	0.145135	143	94	2	12662	ADRB1,OPN4
GO:MF	calcium ion transmembrane transporter activity	GO:0015085	0.716256	0.144932	77	94	1	12662	PKD2L1
GO:MF	molecular_function	GO:0003674	0.716256	0.144932	9802	94	74	12662	ABLIM1,ADK,ADO,ADRB1,ANTXRL,ANXA11,AP3M1,ARHGAP22,ATRNL1,BICC1,BLNK,BMS1,CCDC6,CH25H,CSGALNACT2,DLG5,ENO4,ENTPD1,EXOSC3,FAS,FBXL15,FUT11,GRIFIN,IDE,KAZALD1,KCNMA1,KIF11,LDB3,LOC100190507,LOC100222268,LOC100229828,LOC100231740,LOC100232471,LOC100232794,LOC105759360,LRIT1,LRIT2,MMS19,MSRA,MYOF,NANOS1,NRAP,NRG3,OGDHL,OPN4,PAPSS2,PDCD11,PKD2L1,POLL,POLR3A,PPIF,PSD,PYROXD2,R3HCC1L,RASGEF1A,RBP3,RPS24,…
HP	Hypopigmented skin patches	HP:0001053	0.716646	0.144695	85	94	1	12662	FAS
HP	Abnormal nasal bridge morphology	HP:0000422	0.716646	0.144695	741	94	6	12662	FAM149B1,KCNMA1,KIF11,RBP3,SLC25A22,SUFU
HP	Abnormality of pancreas physiology	HP:0012091	0.716646	0.144695	88	94	1	12662	FAS
HP	Abnormal anterior eye segment morphology	HP:0004328	0.716646	0.144695	875	94	7	12662	ENTPD1,FAS,KCNMA1,KIF11,POLR3A,RBP3,SUFU
HP	Azoospermia	HP:0000027	0.716646	0.144695	86	94	1	12662	NANOS1
HP	Open mouth	HP:0000194	0.716646	0.144695	86	94	1	12662	FAM149B1
HP	Abnormal blood vessel morphology	HP:0033353	0.716646	0.144695	613	94	5	12662	ADK,BICC1,FAS,POLR3A,SUFU
HP	Abnormal tracheobronchial morphology	HP:0005607	0.716646	0.144695	213	94	2	12662	BLNK,STN1
HP	Platyspondyly	HP:0000926	0.716646	0.144695	88	94	1	12662	PAPSS2
HP	Duplication involving bones of the feet	HP:0009136	0.716646	0.144695	88	94	1	12662	FAM149B1
HP	Aplasia/hypoplasia involving bones of the extremities	HP:0045060	0.716646	0.144695	479	94	4	12662	PAPSS2,POLR3A,SLC25A22,SUFU
HP	Abnormal cerebral morphology	HP:0002060	0.716646	0.144695	1410	94	11	12662	ADK,ENTPD1,EXOSC3,FAM149B1,KCNMA1,KIF11,LOC100232471,POLR3A,SLC25A22,SUFU,TUBGCP2
HP	Abnormality of the bladder	HP:0000014	0.716646	0.144695	342	94	3	12662	BICC1,POLR3A,SUFU
HP	Abnormality of the ribs	HP:0000772	0.716646	0.144695	215	94	2	12662	POLR3A,SUFU
HP	Keratoconus	HP:0000563	0.716646	0.144695	85	94	1	12662	RBP3
HP	Abnormal enchondral ossification	HP:0003336	0.716646	0.144695	85	94	1	12662	SUFU
HP	Epileptic encephalopathy	HP:0200134	0.716646	0.144695	87	94	1	12662	SLC25A22
HP	Sinusitis	HP:0000246	0.716646	0.144695	88	94	1	12662	BLNK
HP	Short metacarpal	HP:0010049	0.716646	0.144695	85	94	1	12662	SUFU
HP	Hypotonia	HP:0001252	0.716646	0.144695	1271	94	10	12662	ADK,EXOSC3,FAM149B1,KCNMA1,KIF11,LOC100232471,POLR3A,SLC25A22,SUFU,TUBGCP2
HP	Distal sensory impairment	HP:0002936	0.716646	0.144695	87	94	1	12662	POLR3A
HP	Pancytopenia	HP:0001876	0.716646	0.144695	87	94	1	12662	STN1
HP	Decreased corneal thickness	HP:0100689	0.716646	0.144695	88	94	1	12662	RBP3
HP	Thin corpus callosum	HP:0033725	0.716646	0.144695	609	94	5	12662	FAM149B1,POLR3A,SLC25A22,SUFU,TUBGCP2
[truncated: 1,687 more rows]

## Sheet: e_GO_TES_Paleturquise 
source	term_name	term_id	adjusted_p_value	negative_log10_of_adjusted_p_value	term_size	query_size	intersection_size	effective_domain_size	intersections
GO:CC	cytoplasm	GO:0005737	0.0398728	1.39932	5348	93	57	12662	ACRBP,AGPS,AIMP2,ANKRD13A,ARL3,BLMH,CAPZB,CDKAL1,COPB2,COPS5,CRLF3,CSNK1G1,CWC15,CX3CR1,DNAI1,DNAJA1,DNAJB8,DPYSL5,FAM174C,FAM8A1,FGFR4,GPS1,GRAMD1C,IFT140,IMMP1L,KARS1,LMLN,LOC100227325,LOC105758589,LOC115493492,MED27,MTX3,NCF2,NDUFS4,NECAP1,NMNAT3,NRDC,NT5C3A,OTUD7A,PARVB,PDCD6,PELO,PEX6,PNPT1,POLDIP2,RAB18,RNF220,RSPH3,SLC30A6,SUCLA2,SYNC,TCAIM,TENT5C,THRA,TMEM167B,WBP2NL,ZNF706
GO:CC	acrosomal vesicle	GO:0001669	0.0939609	1.02705	30	93	3	12662	ACRBP,LOC115493492,NCF2
GO:CC	vesicle coat	GO:0030120	0.0939609	1.02705	31	93	3	12662	COPB2,NECAP1,PDCD6
GO:CC	intracellular anatomical structure	GO:0005622	0.0939609	1.02705	7249	93	68	12662	ACRBP,AGPS,AIMP2,ANKRD13A,ARL3,BLMH,CAPZB,CDKAL1,CHFR,COPB2,COPS5,CRLF3,CSNK1G1,CSPP1,CWC15,CWC27,CX3CR1,DNAI1,DNAJA1,DNAJB8,DPYSL5,FAM174C,FAM8A1,FGFR4,GPS1,GRAMD1C,GTF2B,IFT140,IMMP1L,KARS1,KIF24,LMLN,LOC100227325,LOC105758589,LOC115493492,LOC751995,MED27,MTX3,NCF2,NDUFS4,NECAP1,NEPRO,NMNAT3,NR2E3,NRDC,NT5C3A,OTUD7A,PARVB,PDCD6,PELO,PEX6,PNPT1,POLDIP2,PPRC1,QRICH1,RAB18,RNF220,RSPH3,SLC30A6,SUC…
GO:CC	aminoacyl-tRNA synthetase multienzyme complex	GO:0017101	0.0940101	1.02683	9	93	2	12662	AIMP2,KARS1
GO:BP	rRNA import into mitochondrion	GO:0035928	0.106681	0.971914	3	93	2	12662	LOC105758589,PNPT1
GO:BP	RNA import into mitochondrion	GO:0035927	0.106681	0.971914	3	93	2	12662	LOC105758589,PNPT1
GO:CC	9+2 motile cilium	GO:0097729	0.124505	0.904814	52	93	3	12662	CAPZB,MAB21L3,WBP2NL
GO:CC	coated vesicle membrane	GO:0030662	0.124505	0.904814	42	93	3	12662	COPB2,NECAP1,PDCD6
GO:CC	membrane coat	GO:0030117	0.124505	0.904814	58	93	3	12662	COPB2,NECAP1,PDCD6
GO:CC	coated membrane	GO:0048475	0.124505	0.904814	58	93	3	12662	COPB2,NECAP1,PDCD6
GO:CC	perinuclear theca	GO:0033011	0.124505	0.904814	1	93	1	12662	WBP2NL
GO:CC	intracellular organelle	GO:0043229	0.124505	0.904814	6400	93	59	12662	ACRBP,AGPS,AIMP2,ANKRD13A,ARL3,CAPZB,CDKAL1,CHFR,COPB2,COPS5,CSPP1,CWC15,CWC27,CX3CR1,DNAI1,DNAJA1,DNAJB8,FAM8A1,FGFR4,GPS1,GRAMD1C,GTF2B,IFT140,IMMP1L,KARS1,KIF24,LOC105758589,LOC115493492,LOC751995,MED27,MTX3,NCF2,NDUFS4,NECAP1,NEPRO,NMNAT3,NR2E3,NRDC,OTUD7A,PARVB,PDCD6,PELO,PEX6,PNPT1,POLDIP2,PPRC1,QRICH1,RAB18,RSPH3,SLC30A6,SUCLA2,SYNC,TCAIM,TENT5C,THRA,TMEM167B,WBP2NL,WDR82,ZNF706
GO:CC	sperm flagellum	GO:0036126	0.124505	0.904814	50	93	3	12662	CAPZB,MAB21L3,WBP2NL
GO:CC	photoreceptor cell cilium	GO:0097733	0.124505	0.904814	49	93	3	12662	ARL3,IFT140,PEX6
GO:CC	axoneme	GO:0005930	0.124505	0.904814	52	93	3	12662	ARL3,DNAI1,IFT140
GO:CC	cilium	GO:0005929	0.124505	0.904814	316	93	7	12662	ARL3,CAPZB,DNAI1,IFT140,MAB21L3,PEX6,WBP2NL
GO:CC	organelle	GO:0043226	0.124505	0.904814	6561	93	60	12662	ACRBP,AGPS,AIMP2,ANKRD13A,ARL3,CAPZB,CDKAL1,CHFR,COPB2,COPS5,CSPP1,CWC15,CWC27,CX3CR1,DNAI1,DNAJA1,DNAJB8,FAM8A1,FGFR4,GPS1,GRAMD1C,GTF2B,IFT140,IMMP1L,KARS1,KIF24,LOC105758589,LOC115493492,LOC751995,MAB21L3,MED27,MTX3,NCF2,NDUFS4,NECAP1,NEPRO,NMNAT3,NR2E3,NRDC,OTUD7A,PARVB,PDCD6,PELO,PEX6,PNPT1,POLDIP2,PPRC1,QRICH1,RAB18,RSPH3,SLC30A6,SUCLA2,SYNC,TCAIM,TENT5C,THRA,TMEM167B,WBP2NL,WDR82,ZNF706
GO:CC	ciliary plasm	GO:0097014	0.124505	0.904814	52	93	3	12662	ARL3,DNAI1,IFT140
GO:CC	9+0 non-motile cilium	GO:0097731	0.124505	0.904814	57	93	3	12662	ARL3,IFT140,PEX6
GO:BP	rRNA transport	GO:0051029	0.14156	0.84906	4	93	2	12662	LOC105758589,PNPT1
GO:CC	Hrd1p ubiquitin ligase complex	GO:0000836	0.143635	0.842739	2	93	1	12662	FAM8A1
GO:CC	cytoplasmic ubiquitin ligase complex	GO:0000153	0.143635	0.842739	2	93	1	12662	FAM8A1
GO:CC	non-motile cilium	GO:0097730	0.143635	0.842739	72	93	3	12662	ARL3,IFT140,PEX6
GO:CC	ER ubiquitin ligase complex	GO:0000835	0.143635	0.842739	2	93	1	12662	FAM8A1
GO:CC	catalytic complex	GO:1902494	0.143635	0.842739	718	93	11	12662	CWC15,CWC27,DNAI1,FAM8A1,GTF2B,NCF2,NDUFS4,PDCD6,PNPT1,UBE2D2,WDR82
GO:CC	photoreceptor connecting cilium	GO:0032391	0.143635	0.842739	23	93	2	12662	ARL3,IFT140
GO:CC	membrane-bounded organelle	GO:0043227	0.143635	0.842739	5863	93	54	12662	ACRBP,AGPS,AIMP2,ANKRD13A,ARL3,CAPZB,CDKAL1,CHFR,COPB2,COPS5,CWC15,CWC27,CX3CR1,DNAI1,DNAJB8,FAM8A1,FGFR4,GPS1,GRAMD1C,GTF2B,IFT140,IMMP1L,KARS1,LOC105758589,LOC115493492,LOC751995,MAB21L3,MED27,MTX3,NCF2,NDUFS4,NECAP1,NEPRO,NMNAT3,NR2E3,NRDC,OTUD7A,PDCD6,PELO,PEX6,PNPT1,POLDIP2,PPRC1,QRICH1,RAB18,SLC30A6,SUCLA2,TCAIM,TENT5C,THRA,TMEM167B,WBP2NL,WDR82,ZNF706
GO:CC	mitochondrial degradosome	GO:0045025	0.143635	0.842739	2	93	1	12662	PNPT1
GO:CC	mitochondrion	GO:0005739	0.143635	0.842739	779	93	12	12662	CWC15,IMMP1L,KARS1,LOC105758589,MTX3,NDUFS4,NMNAT3,NRDC,PNPT1,POLDIP2,SUCLA2,TCAIM
GO:CC	COP9 signalosome	GO:0008180	0.143635	0.842739	24	93	2	12662	COPS5,GPS1
GO:CC	plasma membrane bounded cell projection cytoplasm	GO:0032838	0.159942	0.796037	76	93	3	12662	ARL3,DNAI1,IFT140
GO:BP	RNA polymerase II preinitiation complex assembly	GO:0051123	0.176103	0.754234	5	93	2	12662	GTF2B,THRA
GO:CC	motile cilium	GO:0031514	0.177692	0.750332	82	93	3	12662	CAPZB,MAB21L3,WBP2NL
GO:CC	cytoplasmic exosome (RNase complex)	GO:0000177	0.177692	0.750332	3	93	1	12662	PNPT1
GO:CC	secretory vesicle	GO:0099503	0.177692	0.750332	146	93	4	12662	ACRBP,COPS5,LOC115493492,NCF2
GO:CC	coated vesicle	GO:0030135	0.18842	0.724873	85	93	3	12662	COPB2,NECAP1,PDCD6
GO:MF	adenylyltransferase activity	GO:0070566	0.208269	0.681375	24	93	3	12662	KARS1,NMNAT3,TENT5C
GO:CC	sperm connecting piece	GO:0097224	0.210066	0.677644	4	93	1	12662	CAPZB
GO:CC	F-actin capping protein complex	GO:0008290	0.210066	0.677644	4	93	1	12662	CAPZB
GO:CC	PTW/PP1 phosphatase complex	GO:0072357	0.213925	0.669738	5	93	1	12662	WDR82
GO:CC	SAM complex	GO:0001401	0.213925	0.669738	5	93	1	12662	MTX3
GO:CC	sperm head	GO:0061827	0.213925	0.669738	5	93	1	12662	WBP2NL
GO:CC	cytoplasmic region	GO:0099568	0.213925	0.669738	96	93	3	12662	ARL3,DNAI1,IFT140
GO:CC	secretory granule	GO:0030141	0.213925	0.669738	99	93	3	12662	ACRBP,LOC115493492,NCF2
GO:CC	Set1C/COMPASS complex	GO:0048188	0.213925	0.669738	5	93	1	12662	WDR82
GO:CC	outer dynein arm	GO:0036157	0.213925	0.669738	5	93	1	12662	DNAI1
GO:CC	ciliary transition zone	GO:0035869	0.213925	0.669738	41	93	2	12662	ARL3,IFT140
GO:MF	thiol-dependent deubiquitinase	GO:0004843	0.22629	0.645335	72	93	3	12662	COPS5,OTUD7A,USP38
GO:MF	cysteine-type peptidase activity	GO:0008234	0.22629	0.645335	130	93	4	12662	BLMH,COPS5,OTUD7A,USP38
GO:MF	general transcription initiation factor binding	GO:0140296	0.22629	0.645335	20	93	2	12662	GTF2B,THRA
GO:MF	tRNA (N(6)-L-threonylcarbamoyladenosine(37)-C(2))-methylthiotransferase	GO:0061712	0.22629	0.645335	1	93	1	12662	CDKAL1
GO:MF	P-type sodium:potassium-exchanging transporter activity	GO:0005391	0.22629	0.645335	3	93	1	12662	MAB21L3
GO:MF	alkylthioltransferase activity	GO:0050497	0.22629	0.645335	2	93	1	12662	CDKAL1
GO:MF	superoxide-generating NADPH oxidase activator activity	GO:0016176	0.22629	0.645335	3	93	1	12662	NCF2
GO:MF	steroid hormone binding	GO:1990239	0.22629	0.645335	3	93	1	12662	MAB21L3
GO:MF	P-type potassium transmembrane transporter activity	GO:0008556	0.22629	0.645335	3	93	1	12662	MAB21L3
GO:MF	alkylglycerone-phosphate synthase activity	GO:0008609	0.22629	0.645335	1	93	1	12662	AGPS
GO:MF	chaperone binding	GO:0051087	0.22629	0.645335	57	93	3	12662	DNAJA1,DNAJB8,MAB21L3
GO:MF	TBP-class protein binding	GO:0017025	0.22629	0.645335	10	93	2	12662	GTF2B,THRA
GO:MF	P-type sodium transporter activity	GO:0008554	0.22629	0.645335	3	93	1	12662	MAB21L3
GO:MF	lysine-tRNA ligase activity	GO:0004824	0.22629	0.645335	1	93	1	12662	KARS1
GO:MF	deubiquitinase activity	GO:0101005	0.22629	0.645335	75	93	3	12662	COPS5,OTUD7A,USP38
GO:MF	thiosulfate sulfurtransferase activity	GO:0004792	0.22629	0.645335	3	93	1	12662	LOC105758589
GO:MF	succinate-CoA ligase (ADP-forming) activity	GO:0004775	0.22629	0.645335	3	93	1	12662	SUCLA2
GO:MF	succinate-CoA ligase activity	GO:0004774	0.22629	0.645335	3	93	1	12662	SUCLA2
GO:MF	nicotinamide-nucleotide adenylyltransferase activity	GO:0000309	0.22629	0.645335	2	93	1	12662	NMNAT3
GO:MF	polyribonucleotide nucleotidyltransferase activity	GO:0004654	0.22629	0.645335	1	93	1	12662	PNPT1
GO:MF	ubiquitin-like protein-specific protease activity	GO:0019783	0.22629	0.645335	80	93	3	12662	COPS5,OTUD7A,USP38
GO:MF	omega peptidase activity	GO:0008242	0.22629	0.645335	81	93	3	12662	COPS5,OTUD7A,USP38
GO:MF	nucleotidyltransferase activity	GO:0016779	0.22629	0.645335	83	93	4	12662	KARS1,NMNAT3,PNPT1,TENT5C
GO:MF	nicotinate-nucleotide adenylyltransferase activity	GO:0004515	0.22629	0.645335	3	93	1	12662	NMNAT3
GO:MF	methylthiotransferase activity	GO:0035596	0.22629	0.645335	2	93	1	12662	CDKAL1
GO:MF	ATP adenylyltransferase activity	GO:0003877	0.22629	0.645335	1	93	1	12662	KARS1
GO:MF	macrophage migration inhibitory factor binding	GO:0035718	0.22629	0.645335	2	93	1	12662	COPS5
GO:MF	N6-threonylcarbomyladenosine methylthiotransferase activity	GO:0035598	0.22629	0.645335	1	93	1	12662	CDKAL1
GO:MF	peptidase activity	GO:0008233	0.228818	0.640511	387	93	7	12662	BLMH,COPS5,IMMP1L,LMLN,NRDC,OTUD7A,USP38
GO:MF	GDP binding	GO:0019003	0.228818	0.640511	32	93	2	12662	ARL3,RAB18
GO:MF	catalytic activity	GO:0003824	0.228912	0.640332	3643	93	36	12662	AGPS,ARL3,BLMH,CDKAL1,CHFR,COPS5,CSNK1G1,CWC27,DPYSL5,ENDOD1,FAM13A,FGFR4,GTF2B,IMMP1L,KARS1,KIF24,LMLN,LOC100227325,LOC105758589,MAB21L3,NCF2,NDUFS4,NMNAT3,NRDC,NT5C3A,OTUD7A,PELO,PNPT1,RAB11B,RAB18,RNF220,SUCLA2,TENT5C,UBE2D2,USP38,WDR82
GO:CC	COPI vesicle coat	GO:0030126	0.236084	0.626933	7	93	1	12662	COPB2
GO:CC	sodium:potassium-exchanging ATPase complex	GO:0005890	0.236084	0.626933	6	93	1	12662	MAB21L3
GO:CC	NADPH oxidase complex	GO:0043020	0.236084	0.626933	7	93	1	12662	NCF2
GO:CC	cytoplasmic vesicle	GO:0031410	0.236084	0.626933	749	93	10	12662	ACRBP,ANKRD13A,COPB2,COPS5,CX3CR1,FGFR4,LOC115493492,NCF2,NECAP1,PDCD6
GO:CC	oxidoreductase complex	GO:1990204	0.236084	0.626933	48	93	2	12662	NCF2,NDUFS4
GO:CC	intraciliary transport particle A	GO:0030991	0.236084	0.626933	6	93	1	12662	IFT140
GO:CC	transport vesicle	GO:0030133	0.236084	0.626933	113	93	3	12662	COPS5,FGFR4,PDCD6
GO:CC	endoplasmic reticulum-plasma membrane contact site	GO:0140268	0.236084	0.626933	7	93	1	12662	GRAMD1C
GO:CC	cation-transporting ATPase complex	GO:0090533	0.236084	0.626933	7	93	1	12662	MAB21L3
GO:CC	transcription preinitiation complex	GO:0097550	0.236084	0.626933	7	93	1	12662	GTF2B
GO:CC	intracellular vesicle	GO:0097708	0.236084	0.626933	754	93	10	12662	ACRBP,ANKRD13A,COPB2,COPS5,CX3CR1,FGFR4,LOC115493492,NCF2,NECAP1,PDCD6
HP	Rod-cone dystrophy	HP:0000510	0.238266	0.622939	157	93	7	12662	ARL3,CWC27,DNAI1,IFT140,NR2E3,PEX6,RSPH3
GO:CC	U2-type spliceosomal complex	GO:0005684	0.252284	0.59811	52	93	2	12662	CWC15,CWC27
GO:CC	catalytic step 2 spliceosome	GO:0071013	0.252284	0.59811	52	93	2	12662	CWC15,CWC27
GO:MF	C3HC4-type RING finger domain binding	GO:0055131	0.256417	0.591054	4	93	1	12662	DNAJA1
GO:MF	C-X3-C chemokine binding	GO:0019960	0.256417	0.591054	4	93	1	12662	CX3CR1
GO:CC	COPI-coated vesicle membrane	GO:0030663	0.262034	0.581642	9	93	1	12662	COPB2
GO:CC	mitochondrial protein-containing complex	GO:0098798	0.262034	0.581642	121	93	3	12662	MTX3,NDUFS4,PNPT1
GO:CC	sarcolemma	GO:0042383	0.262034	0.581642	55	93	2	12662	MAB21L3,SYNC
GO:CC	mitochondrial outer membrane translocase complex	GO:0005742	0.262034	0.581642	9	93	1	12662	MTX3
GO:CC	ATPase dependent transmembrane transport complex	GO:0098533	0.262034	0.581642	9	93	1	12662	MAB21L3
GO:CC	axonemal dynein complex	GO:0005858	0.262034	0.581642	9	93	1	12662	DNAI1
GO:BP	photoreceptor cell development	GO:0042461	0.264429	0.57769	27	93	3	12662	ARL3,IFT140,NR2E3
GO:MF	nucleotide binding	GO:0000166	0.264835	0.577024	1449	93	17	12662	AGPS,ARL3,CHFR,CSNK1G1,DNAJA1,FGFR4,KARS1,KIF24,LOC100227325,MAB21L3,NMNAT3,NT5C3A,PEX6,RAB11B,RAB18,SUCLA2,UBE2D2
GO:MF	fibroblast growth factor-activated receptor activity	GO:0005007	0.264835	0.577024	5	93	1	12662	FGFR4
GO:MF	hydrolase activity	GO:0016787	0.264835	0.577024	1441	93	17	12662	ARL3,BLMH,COPS5,DPYSL5,ENDOD1,IMMP1L,KIF24,LMLN,MAB21L3,NRDC,NT5C3A,OTUD7A,PELO,PNPT1,RAB11B,RAB18,USP38
GO:MF	GTPase activating protein binding	GO:0032794	0.264835	0.577024	5	93	1	12662	ARL3
GO:MF	nucleoside phosphate binding	GO:1901265	0.264835	0.577024	1449	93	17	12662	AGPS,ARL3,CHFR,CSNK1G1,DNAJA1,FGFR4,KARS1,KIF24,LOC100227325,MAB21L3,NMNAT3,NT5C3A,PEX6,RAB11B,RAB18,SUCLA2,UBE2D2
GO:MF	RNA adenylyltransferase activity	GO:1990817	0.264835	0.577024	5	93	1	12662	TENT5C
GO:MF	thyroid hormone binding	GO:0070324	0.264835	0.577024	5	93	1	12662	THRA
GO:CC	endoplasmic reticulum exit site	GO:0070971	0.268452	0.571134	10	93	1	12662	PDCD6
GO:CC	intracellular membrane-bounded organelle	GO:0043231	0.268452	0.571134	5641	93	49	12662	ACRBP,AGPS,AIMP2,ANKRD13A,ARL3,CDKAL1,CHFR,COPB2,COPS5,CWC15,CWC27,CX3CR1,DNAJB8,FAM8A1,FGFR4,GPS1,GRAMD1C,GTF2B,IMMP1L,KARS1,LOC105758589,LOC115493492,LOC751995,MED27,MTX3,NCF2,NDUFS4,NECAP1,NEPRO,NMNAT3,NR2E3,NRDC,OTUD7A,PDCD6,PELO,PEX6,PNPT1,POLDIP2,PPRC1,QRICH1,RAB18,SLC30A6,SUCLA2,TCAIM,TENT5C,THRA,TMEM167B,WDR82,ZNF706
GO:CC	outer mitochondrial membrane protein complex	GO:0098799	0.268452	0.571134	10	93	1	12662	MTX3
GO:CC	WASH complex	GO:0071203	0.268452	0.571134	10	93	1	12662	CAPZB
GO:CC	COPI-coated vesicle	GO:0030137	0.268452	0.571134	10	93	1	12662	COPB2
GO:MF	oxidoreductase activity, acting on NAD(P)H	GO:0016651	0.270441	0.567928	43	93	2	12662	NCF2,NDUFS4
GO:MF	hormone binding	GO:0042562	0.270441	0.567928	43	93	2	12662	MAB21L3,THRA
GO:MF	electron transfer activity	GO:0009055	0.270441	0.567928	42	93	2	12662	FAM13A,NDUFS4
GO:CC	centriole	GO:0005814	0.274962	0.560728	61	93	2	12662	IFT140,KIF24
GO:CC	membrane protein complex	GO:0098796	0.277581	0.55661	604	93	8	12662	COPB2,FAM8A1,MAB21L3,MTX3,NCF2,NDUFS4,NECAP1,PDCD6
GO:MF	unfolded protein binding	GO:0051082	0.280172	0.552575	45	93	2	12662	DNAJA1,DNAJB8
GO:MF	steroid binding	GO:0005496	0.280172	0.552575	46	93	2	12662	GRAMD1C,MAB21L3
GO:MF	small molecule binding	GO:0036094	0.280172	0.552575	1613	93	18	12662	AGPS,ARL3,CHFR,CSNK1G1,DNAJA1,FGFR4,GRAMD1C,KARS1,KIF24,LOC100227325,MAB21L3,NMNAT3,NT5C3A,PEX6,RAB11B,RAB18,SUCLA2,UBE2D2
GO:MF	poly(G) binding	GO:0034046	0.280172	0.552575	6	93	1	12662	PNPT1
GO:CC	COPII vesicle coat	GO:0030127	0.281625	0.550329	11	93	1	12662	PDCD6
GO:CC	vesicle	GO:0031982	0.284335	0.54617	824	93	10	12662	ACRBP,ANKRD13A,COPB2,COPS5,CX3CR1,FGFR4,LOC115493492,NCF2,NECAP1,PDCD6
GO:CC	clathrin vesicle coat	GO:0030125	0.289577	0.538236	12	93	1	12662	NECAP1
GO:CC	endoplasmic reticulum tubular network	GO:0071782	0.289577	0.538236	12	93	1	12662	RAB18
GO:CC	ER to Golgi transport vesicle membrane	GO:0012507	0.289577	0.538236	12	93	1	12662	PDCD6
GO:MF	superoxide-generating NAD(P)H oxidase activity	GO:0016175	0.295919	0.528827	7	93	1	12662	NCF2
GO:MF	Tat protein binding	GO:0030957	0.295919	0.528827	7	93	1	12662	DNAJA1
GO:MF	5'-nucleotidase activity	GO:0008253	0.295919	0.528827	7	93	1	12662	NT5C3A
GO:CC	ubiquitin ligase complex	GO:0000151	0.299964	0.522931	144	93	3	12662	FAM8A1,PDCD6,UBE2D2
GO:CC	microbody	GO:0042579	0.299964	0.522931	69	93	2	12662	AGPS,PEX6
GO:CC	peroxisome	GO:0005777	0.299964	0.522931	69	93	2	12662	AGPS,PEX6
GO:MF	sulfurtransferase activity	GO:0016783	0.301502	0.52071	8	93	1	12662	LOC105758589
GO:MF	protein-membrane adaptor activity	GO:0043495	0.301502	0.52071	8	93	1	12662	PDCD6
GO:MF	nucleotidase activity	GO:0008252	0.301502	0.52071	8	93	1	12662	NT5C3A
GO:MF	ubiquitin ligase-substrate adaptor activity	GO:1990756	0.301502	0.52071	8	93	1	12662	PDCD6
GO:MF	5S rRNA binding	GO:0008097	0.301502	0.52071	8	93	1	12662	LOC105758589
GO:MF	histone methyltransferase activity (H3-K4 specific)	GO:0042800	0.301502	0.52071	8	93	1	12662	WDR82
GO:MF	metal ion binding	GO:0046872	0.305974	0.514316	1787	93	19	12662	ARL3,CDKAL1,CHFR,COPS5,DNAJA1,ENDOD1,GTF2B,LMLN,LOC100227325,MAB21L3,NR2E3,NRDC,NT5C3A,OTUD7A,PDCD6,PELO,RNF220,SUCLA2,THRA
GO:MF	ion binding	GO:0043167	0.309813	0.5089	3072	93	29	12662	AGPS,ARL3,CDKAL1,CHFR,COPS5,CSNK1G1,DNAJA1,ENDOD1,FGFR4,GTF2B,KARS1,KIF24,LMLN,LOC100227325,MAB21L3,NMNAT3,NR2E3,NRDC,NT5C3A,OTUD7A,PDCD6,PELO,PEX6,RAB11B,RAB18,RNF220,SUCLA2,THRA,UBE2D2
GO:MF	purine nucleotide binding	GO:0017076	0.309813	0.5089	1297	93	14	12662	ARL3,CSNK1G1,DNAJA1,FGFR4,KARS1,KIF24,LOC100227325,MAB21L3,NMNAT3,PEX6,RAB11B,RAB18,SUCLA2,UBE2D2
GO:MF	fibroblast growth factor binding	GO:0017134	0.309813	0.5089	12	93	1	12662	FGFR4
GO:MF	ubiquitin-dependent protein binding	GO:0140036	0.309813	0.5089	10	93	1	12662	ANKRD13A
GO:MF	cytokine binding	GO:0019955	0.309813	0.5089	57	93	2	12662	COPS5,CX3CR1
GO:MF	chemokine binding	GO:0019956	0.309813	0.5089	13	93	1	12662	CX3CR1
GO:MF	isopeptidase activity	GO:0070122	0.309813	0.5089	13	93	1	12662	COPS5
GO:MF	P-type transmembrane transporter activity	GO:0140358	0.309813	0.5089	12	93	1	12662	MAB21L3
GO:MF	ubiquitin-like protein ligase activity	GO:0061659	0.309813	0.5089	132	93	3	12662	CHFR,RNF220,UBE2D2
GO:MF	ribonucleotide binding	GO:0032553	0.309813	0.5089	1298	93	14	12662	ARL3,CSNK1G1,DNAJA1,FGFR4,KARS1,KIF24,LOC100227325,MAB21L3,NMNAT3,PEX6,RAB11B,RAB18,SUCLA2,UBE2D2
GO:MF	ubiquitin-like protein conjugating enzyme activity	GO:0061650	0.309813	0.5089	14	93	1	12662	UBE2D2
GO:MF	heterocyclic compound binding	GO:1901363	0.309813	0.5089	3134	93	29	12662	AGPS,ARL3,CHFR,CSNK1G1,DNAJA1,ENDOD1,FAM13A,FGFR4,GTF2B,KARS1,KIF24,LOC100227325,LOC105758589,LOC751995,MAB21L3,NMNAT3,NR2E3,NT5C3A,OTUD7A,PEX6,PNPT1,POLDIP2,PPRC1,QRICH1,RAB11B,RAB18,SUCLA2,THRA,UBE2D2
GO:MF	ubiquitin conjugating enzyme activity	GO:0061631	0.309813	0.5089	12	93	1	12662	UBE2D2
GO:MF	ubiquitin protein ligase activity	GO:0061630	0.309813	0.5089	125	93	3	12662	CHFR,RNF220,UBE2D2
GO:MF	oxidoreductase activity, acting on NAD(P)H, oxygen as acceptor	GO:0050664	0.309813	0.5089	12	93	1	12662	NCF2
GO:MF	NADH dehydrogenase (quinone) activity	GO:0050136	0.309813	0.5089	14	93	1	12662	NDUFS4
GO:MF	purine ribonucleoside triphosphate binding	GO:0035639	0.309813	0.5089	1252	93	14	12662	ARL3,CSNK1G1,DNAJA1,FGFR4,KARS1,KIF24,LOC100227325,MAB21L3,NMNAT3,PEX6,RAB11B,RAB18,SUCLA2,UBE2D2
GO:MF	thyroid hormone receptor binding	GO:0046966	0.309813	0.5089	13	93	1	12662	GTF2B
GO:MF	organic cyclic compound binding	GO:0097159	0.309813	0.5089	3173	93	30	12662	AGPS,ARL3,CHFR,CSNK1G1,DNAJA1,ENDOD1,FAM13A,FGFR4,GRAMD1C,GTF2B,KARS1,KIF24,LOC100227325,LOC105758589,LOC751995,MAB21L3,NMNAT3,NR2E3,NT5C3A,OTUD7A,PEX6,PNPT1,POLDIP2,PPRC1,QRICH1,RAB11B,RAB18,SUCLA2,THRA,UBE2D2
GO:MF	cation binding	GO:0043169	0.309813	0.5089	1841	93	19	12662	ARL3,CDKAL1,CHFR,COPS5,DNAJA1,ENDOD1,GTF2B,LMLN,LOC100227325,MAB21L3,NR2E3,NRDC,NT5C3A,OTUD7A,PDCD6,PELO,RNF220,SUCLA2,THRA
GO:MF	purine ribonucleotide binding	GO:0032555	0.309813	0.5089	1287	93	14	12662	ARL3,CSNK1G1,DNAJA1,FGFR4,KARS1,KIF24,LOC100227325,MAB21L3,NMNAT3,PEX6,RAB11B,RAB18,SUCLA2,UBE2D2
GO:MF	ubiquitination-like modification-dependent protein binding	GO:0140035	0.309813	0.5089	10	93	1	12662	ANKRD13A
GO:MF	WW domain binding	GO:0050699	0.309813	0.5089	10	93	1	12662	WBP2NL
GO:MF	NADH dehydrogenase (ubiquinone) activity	GO:0008137	0.309813	0.5089	14	93	1	12662	NDUFS4
GO:MF	poly(U) RNA binding	GO:0008266	0.309813	0.5089	13	93	1	12662	PNPT1
GO:MF	transferase activity, transferring sulphur-containing groups	GO:0016782	0.309813	0.5089	57	93	2	12662	CDKAL1,LOC105758589
GO:MF	metalloendopeptidase activity	GO:0004222	0.309813	0.5089	72	93	2	12662	COPS5,LMLN
GO:MF	microtubule binding	GO:0008017	0.309813	0.5089	131	93	3	12662	ARL3,DPYSL5,KIF24
GO:MF	ATPase activator activity	GO:0001671	0.309813	0.5089	14	93	1	12662	DNAJA1
GO:MF	RNA polymerase II core promoter sequence-specific DNA binding	GO:0000979	0.309813	0.5089	12	93	1	12662	GTF2B
GO:MF	P-type ion transporter activity	GO:0015662	0.309813	0.5089	12	93	1	12662	MAB21L3
GO:MF	magnesium ion binding	GO:0000287	0.309813	0.5089	147	93	3	12662	ARL3,NT5C3A,SUCLA2
GO:MF	NAD+ kinase activity	GO:0003951	0.309813	0.5089	14	93	1	12662	LOC100227325
GO:MF	polynucleotide adenylyltransferase activity	GO:0004652	0.309813	0.5089	11	93	1	12662	TENT5C
GO:MF	diacylglycerol kinase activity	GO:0004143	0.309813	0.5089	9	93	1	12662	LOC100227325
GO:MF	metallopeptidase activity	GO:0008237	0.309813	0.5089	129	93	3	12662	COPS5,LMLN,NRDC
GO:MF	poly-pyrimidine tract binding	GO:0008187	0.309813	0.5089	14	93	1	12662	PNPT1
GO:BP	maintenance of translational fidelity	GO:1990145	0.311078	0.50713	1	93	1	12662	CDKAL1
GO:BP	error-free translesion synthesis	GO:0070987	0.311078	0.50713	1	93	1	12662	POLDIP2
GO:BP	polyadenylation-dependent mRNA catabolic process	GO:0071047	0.311078	0.50713	1	93	1	12662	PNPT1
GO:BP	nuclear polyadenylation-dependent mRNA catabolic process	GO:0071042	0.311078	0.50713	1	93	1	12662	PNPT1
GO:BP	tRNA methylthiolation	GO:0035600	0.311078	0.50713	1	93	1	12662	CDKAL1
GO:BP	negative regulation of metaphase/anaphase transition of meiotic cell cycle	GO:1902103	0.311078	0.50713	2	93	1	12662	CHFR
GO:BP	transcription preinitiation complex assembly	GO:0070897	0.311078	0.50713	10	93	2	12662	GTF2B,THRA
GO:BP	intrinsic apoptotic signaling pathway in response to nitrosative stress	GO:1990442	0.311078	0.50713	2	93	1	12662	DNAJA1
GO:BP	protein modification by small protein conjugation or removal	GO:0070647	0.311078	0.50713	525	93	10	12662	AIMP2,CHFR,COPS5,DNAJA1,GPS1,OTUD7A,PDCD6,RNF220,UBE2D2,USP38
GO:BP	protein modification by small protein removal	GO:0070646	0.311078	0.50713	102	93	4	12662	COPS5,GPS1,OTUD7A,USP38
GO:BP	mitochondrion morphogenesis	GO:0070584	0.311078	0.50713	11	93	2	12662	PNPT1,POLDIP2
GO:BP	nuclear-transcribed mRNA catabolic process, non-stop decay	GO:0070481	0.311078	0.50713	1	93	1	12662	PELO
GO:BP	diadenosine tetraphosphate metabolic process	GO:0015965	0.311078	0.50713	2	93	1	12662	KARS1
GO:BP	lung epithelial cell differentiation	GO:0060487	0.311078	0.50713	19	93	2	12662	AIMP2,THRA
GO:BP	female courtship behavior	GO:0008050	0.311078	0.50713	2	93	1	12662	THRA
GO:BP	lung cell differentiation	GO:0060479	0.311078	0.50713	20	93	2	12662	AIMP2,THRA
GO:BP	regulation of thyroid hormone mediated signaling pathway	GO:0002155	0.311078	0.50713	2	93	1	12662	THRA
GO:BP	meiotic spindle checkpoint signaling	GO:0044779	0.311078	0.50713	2	93	1	12662	CHFR
GO:BP	establishment or maintenance of cell polarity regulating cell shape	GO:0071963	0.311078	0.50713	1	93	1	12662	PARVB
GO:BP	negative regulation of nitrosative stress-induced intrinsic apoptotic signaling pathway	GO:1905259	0.311078	0.50713	2	93	1	12662	DNAJA1
GO:BP	RNA polymerase II core complex assembly	GO:1990114	0.311078	0.50713	1	93	1	12662	GTF2B
GO:BP	negative regulation of meiotic cell cycle phase transition	GO:1901994	0.311078	0.50713	2	93	1	12662	CHFR
GO:BP	regulation of meiotic cell cycle phase transition	GO:1901993	0.311078	0.50713	2	93	1	12662	CHFR
GO:BP	photoreceptor cell differentiation	GO:0046530	0.311078	0.50713	38	93	3	12662	ARL3,IFT140,NR2E3
GO:BP	transcriptional start site selection at RNA polymerase II promoter	GO:0001174	0.311078	0.50713	1	93	1	12662	GTF2B
GO:BP	DNA-templated transcriptional start site selection	GO:0001173	0.311078	0.50713	1	93	1	12662	GTF2B
GO:BP	plasma membrane bounded cell projection assembly	GO:0120031	0.311078	0.50713	262	93	6	12662	ARL3,CAPZB,DNAI1,IFT140,KIF24,PARVB
GO:BP	positive regulation of female receptivity	GO:0045925	0.311078	0.50713	1	93	1	12662	THRA
GO:BP	response to glycoside	GO:1903416	0.311078	0.50713	2	93	1	12662	MAB21L3
GO:BP	mitochondrial mRNA polyadenylation	GO:0097222	0.311078	0.50713	1	93	1	12662	PNPT1
GO:BP	mitochondrial mRNA 3'-end processing	GO:0090616	0.311078	0.50713	1	93	1	12662	PNPT1
GO:BP	metaphase/anaphase transition of meiotic cell cycle	GO:0044785	0.311078	0.50713	2	93	1	12662	CHFR
GO:BP	mitochondrial mRNA processing	GO:0090615	0.311078	0.50713	2	93	1	12662	PNPT1
GO:BP	mitochondrial RNA 5'-end processing	GO:0000964	0.311078	0.50713	2	93	1	12662	PNPT1
GO:BP	positive regulation of aminoacyl-tRNA ligase activity	GO:1903632	0.311078	0.50713	1	93	1	12662	AIMP2
GO:BP	female pronucleus assembly	GO:0035038	0.311078	0.50713	2	93	1	12662	WBP2NL
GO:BP	protein import into peroxisome matrix, translocation	GO:0016561	0.311078	0.50713	2	93	1	12662	PEX6
GO:BP	basophil activation	GO:0045575	0.311078	0.50713	2	93	1	12662	KARS1
GO:BP	male pronucleus assembly	GO:0035039	0.311078	0.50713	1	93	1	12662	WBP2NL
GO:BP	regulation of meiotic chromosome separation	GO:1905132	0.311078	0.50713	2	93	1	12662	CHFR
GO:BP	negative regulation of meiotic chromosome separation	GO:1905133	0.311078	0.50713	2	93	1	12662	CHFR
GO:BP	regulation of nitrosative stress-induced intrinsic apoptotic signaling pathway	GO:1905258	0.311078	0.50713	2	93	1	12662	DNAJA1
GO:BP	negative regulation of protein localization to endosome	GO:1905667	0.311078	0.50713	1	93	1	12662	ANKRD13A
GO:BP	regulation of aminoacyl-tRNA ligase activity	GO:1903630	0.311078	0.50713	1	93	1	12662	AIMP2
GO:BP	positive regulation of protein ubiquitination	GO:0031398	0.311078	0.50713	58	93	3	12662	AIMP2,CHFR,PDCD6
GO:BP	regulation of metaphase/anaphase transition of meiotic cell cycle	GO:1902102	0.311078	0.50713	2	93	1	12662	CHFR
GO:BP	diadenosine polyphosphate metabolic process	GO:0015959	0.311078	0.50713	2	93	1	12662	KARS1
GO:BP	diadenosine tetraphosphate biosynthetic process	GO:0015966	0.311078	0.50713	2	93	1	12662	KARS1
GO:BP	response to pheromone	GO:0019236	0.311078	0.50713	1	93	1	12662	GPR180
GO:BP	cell projection assembly	GO:0030031	0.311078	0.50713	265	93	6	12662	ARL3,CAPZB,DNAI1,IFT140,KIF24,PARVB
GO:BP	basophil activation involved in immune response	GO:0002276	0.311078	0.50713	2	93	1	12662	KARS1
GO:BP	intraciliary transport	GO:0042073	0.311078	0.50713	22	93	2	12662	ARL3,IFT140
GO:BP	regulation of protein ubiquitination	GO:0031396	0.311078	0.50713	118	93	4	12662	AIMP2,CHFR,DNAJA1,PDCD6
GO:BP	protein deneddylation	GO:0000338	0.311078	0.50713	9	93	2	12662	COPS5,GPS1
GO:BP	lysyl-tRNA aminoacylation	GO:0006430	0.311078	0.50713	1	93	1	12662	KARS1
GO:BP	diadenosine polyphosphate biosynthetic process	GO:0015960	0.311078	0.50713	2	93	1	12662	KARS1
GO:BP	microtubule-based movement	GO:0007018	0.311078	0.50713	179	93	5	12662	ARL3,DNAI1,DNAJA1,IFT140,KIF24
GO:BP	negative regulation of RNA polymerase II transcription preinitiation complex assembly	GO:0017055	0.311078	0.50713	1	93	1	12662	THRA
HP	Abnormal CSF neopterin level	HP:0040203	0.314706	0.502095	1	93	1	12662	PNPT1
HP	Hyporeflexia	HP:0001265	0.314706	0.502095	281	93	8	12662	KARS1,MAB21L3,NDUFS4,NECAP1,PEX6,PNPT1,QRICH1,SUCLA2
HP	High anterior hairline	HP:0009890	0.314706	0.502095	39	93	3	12662	CWC27,NEPRO,PEX6
HP	Squared iliac bones	HP:0003177	0.314706	0.502095	4	93	1	12662	NEPRO
HP	Twelfth rib hypoplasia	HP:0006668	0.314706	0.502095	1	93	1	12662	CSPP1
HP	Abnormal tracheobronchial morphology	HP:0005607	0.314706	0.502095	213	93	5	12662	DNAI1,FAM13A,LOC751995,NCF2,RSPH3
HP	Hypoautofluorescent retinal lesion	HP:0025159	0.314706	0.502095	2	93	1	12662	CWC27
HP	Bronchiectasis	HP:0002110	0.314706	0.502095	83	93	3	12662	DNAI1,FAM13A,RSPH3
HP	Epiphyseal stippling	HP:0010655	0.314706	0.502095	26	93	2	12662	AGPS,PEX6
HP	Retinoschisis	HP:0030502	0.314706	0.502095	5	93	1	12662	NR2E3
HP	Impaired oxidative burst	HP:0003203	0.314706	0.502095	5	93	1	12662	NCF2
HP	Foot polydactyly	HP:0001829	0.314706	0.502095	84	93	3	12662	ARL3,CSPP1,IFT140
HP	Peribronchovascular interstitial thickening	HP:0025177	0.314706	0.502095	31	93	2	12662	DNAI1,RSPH3
HP	Decreased activity of NADPH oxidase	HP:0003206	0.314706	0.502095	4	93	1	12662	NCF2
HP	Refractory anemia	HP:0005505	0.314706	0.502095	5	93	1	12662	GREM1
HP	Elevated CSF neopterin level	HP:0040204	0.314706	0.502095	1	93	1	12662	PNPT1
HP	Abnormal anatomic location of the heart	HP:0004307	0.314706	0.502095	87	93	4	12662	ARL3,CSPP1,DNAI1,RSPH3
HP	Respiratory insufficiency	HP:0002093	0.314706	0.502095	421	93	7	12662	DNAI1,HACD1,IFT140,NDUFS4,PEX6,RSPH3,SUCLA2
HP	Hip contracture	HP:0003273	0.314706	0.502095	28	93	2	12662	HACD1,PNPT1
HP	Vitreous floaters	HP:0100832	0.314706	0.502095	1	93	1	12662	ARL3
HP	Subretinal deposits	HP:0031528	0.314706	0.502095	1	93	1	12662	CSPP1
[truncated: 3,230 more rows]

## Sheet: f_GO_TES_Orangered3
source	term_name	term_id	adjusted_p_value	negative_log10_of_adjusted_p_value	term_size	query_size	intersection_size	effective_domain_size	intersections
[truncated: 216 more rows]

[truncated: 3 more sheets: g_GO_TES_Cyan, h_GO_TES_Lightgreen, i_Module_Gene_Correlations]
