# Supplementary material for: Transcriptomic changes in the testes and brain associated with sperm competition risk in male zebra finches
Source: Research Square preprint supplement (doi:10.21203/rs.3.rs-3456692/v1), 2023-11-28
Supplement: Supplementary file 2 [file 885c20c85fe3bab36fbc39ba.xlsx]

## Sheet: a_Modules_Treatment_ANOVA
Modules	# Genes	F	p	Qval	Factor
PAL Floralwhite	108	8.327	0.0056	0.2303	Treatment
PAL Saddlebrown	173	7.251	0.0094	0.2303	Treatment
PAL Blue	1986	6.18	0.016	0.2613	Treatment
PAL Darkolivegreen	160	4.506	0.0383	0.3977	Treatment
PAL Darkturquoise	193	4.137	0.0468	0.3977	Treatment
PAL Darkgreen	210	4.066	0.0487	0.3977	Treatment
PAL Yellowgreen	131	3.521	0.0659	0.4296	Treatment
PAL Sienna3	141	3.329	0.0735	0.4296	Treatment
PAL Turquoise	3579	3.204	0.0789	0.4296	Treatment
PAL Lightpink4	54	2.963	0.0908	0.4449	Treatment
PAL Midnightblue	262	2.46	0.1225	0.5337	Treatment
PAL Cyan	276	2.253	0.1391	0.5337	Treatment
PAL Darkgrey	189	2.153	0.1479	0.5337	Treatment
PAL Boneydew1	45	2.105	0.1525	0.5337	Treatment
PAL Grey60	433	1.78	0.1877	0.6132	Treatment
PAL Navajowhite2	58	1.525	0.2221	0.6402	Treatment
PAL Red	3339	1.525	0.2221	0.6402	Treatment
PAL Darkseagreen4	44	1.367	0.2474	0.6551	Treatment
PAL Darkred	224	1.329	0.254	0.6551	Treatment
PAL Bisque4	96	1.254	0.2676	0.6556	Treatment
PAL Tan	322	1.078	0.3037	0.7086	Treatment
PAL Skyblue	175	0.916	0.3427	0.7633	Treatment
PAL Darkorange	177	0.825	0.3676	0.7713	Treatment
PAL Orangered4	120	0.768	0.3848	0.7713	Treatment
PAL Royalblue	230	0.74	0.3935	0.7713	Treatment
PAL Lavenderblush3	736	0.511	0.4775	0.8666	Treatment
PAL Salmon4	64	0.511	0.4775	0.8666	Treatment
PAL Steelblue	172	0.345	0.5595	0.8714	Treatment
PAL Ivory	109	0.326	0.5702	0.8714	Treatment
PAL Darkorange2	108	0.291	0.5919	0.8714	Treatment
PAL Paleturquoise	169	0.291	0.5919	0.8714	Treatment
PAL Lightsteelblue1	116	0.197	0.659	0.8714	Treatment
PAL Plum2	83	0.183	0.6704	0.8714	Treatment
PAL Purple	422	0.183	0.6704	0.8714	Treatment
PAL Maroon	57	0.17	0.682	0.8714	Treatment
PAL Lightyellow	242	0.17	0.682	0.8714	Treatment
PAL White	177	0.17	0.682	0.8714	Treatment
PAL Salmon	321	0.157	0.6936	0.8714	Treatment
PAL Lightcyan1	115	0.157	0.6936	0.8714	Treatment
PAL Lightgreen	255	0.1	0.7527	0.899	Treatment
PAL Mediumpurple3	119	0.1	0.7527	0.899	Treatment
PAL PLum1	120	0.081	0.7767	0.899	Treatment
PAL Brown4	107	0.072	0.7889	0.899	Treatment
PAL Greenyellow	386	0.049	0.8255	0.9123	Treatment
PAL Palevioletred3	58	0.042	0.8378	0.9123	Treatment
PAL Darkmagenta	148	0.03	0.8625	0.9188	Treatment
PAL Thistle2	81	0.002	0.9623	0.9749	Treatment
PAL Violet	162	0.002	0.9623	0.9749	Treatment
PAL Thistle1	74	0.001	0.9749	0.9749	Treatment

## Sheet: b_Gene_IDs
PAL Floralwhite	PAL Saddlebrown	PAL Blue	PAL Darkolivegreen	PAL Darkturquoise	PAL Darkgreen	PAL Yellowgreen	PAL Sienna3	PAL Turquoise	PAL Lightpink4	PAL Midnightblue	PAL Cyan	PAL Darkgrey	PAL Boneydew1	PAL Grey60	PAL Navajowhite2	PAL Red	PAL Darkseagreen4	PAL Darkred	PAL Bisque4	PAL Tan	PAL Skyblue	PAL Darkorange	PAL Orangered4	PAL Royalblue	PAL Lavenderblush3	PAL Salmon4	PAL Steelblue	PAL Ivory	PAL Darkorange2	PAL Paleturquoise	PAL Lightsteelblue1	PAL Plum2	PAL Purple	PAL Maroon	PAL Lightyellow	PAL White	PAL Salmon	PAL Lightcyan1	PAL Lightgreen	PAL Mediumpurple3	PAL PLum1	PAL Brown4	PAL Greenyellow	PAL Palevioletred3	PAL Darkmagenta	PAL Thistle2	PAL Violet	PAL Thistle1
ADD3	ABTB2	AACS	ACAD11	ADAMTS18	AASS	ACOT13	ACSS3	AAAS	ADAM28	ABAT	ABHD12	ABCC8	ACADS	ABCD3	ABHD14B	A2M	ACYP1	ABCG8	ABCA12	ADA	AAK1	ACACA	ANKRD29	ABCD4	AANAT	ABCA4	AADAT	ADGRG1	ALDH5A1	ACE2	ACP5	ACAT2	ABCC9	ABCA1	ABTB1	ABCA3	AAMDC	ACSL6	ABCB7	BOLL	AARS2	ALDH7A1	ABCC5	BDKRB2	ABCB11	ABITRAM	ABCG5	A1CF
ADGRA1	ACTR6	ABCB10	AGMO	ADAMTS7	ABCD2	ADHFE1	ADAMTS20	AAGAB	ANKRD35	ABCC3	ABRACL	AMPD3	ANHX	ACP2	ACTR8	AARS1	AKIP1	ACP6	AGAP1	APBB1IP	ABCA2	AIMP1	ANKRD46	ACTN1	ABCC4	ACKR3	AASDH	AMFR	AOAH	ADRB1	ADAT2	BCKDHB	ABI3BP	ABHD17B	ACBD5	ABCB9	AASDHPPT	BEAN1	ACO1	C1AH12orf50	ABCC10	ANKRD17	ABHD17A	CCDC88C	ACMSD	ALOX5AP	ACSS1	ASB15
ALOX5	AFAP1L1	ABI1	AGR2	ADORA3	ADCK2	AKAIN1	ALG5	AAMP	B3GNT5	ADAP1	ADCY1	ANO3	C15H22orf15	ACSL3	ARHGEF3	ABCA5	APIP	ANGPTL5	ATIC	ARHGAP30	ADGRD2	AKTIP	ARHGEF33	AK7	ABL2	ACSL5	ABCG2	APRT	BPNT2	AGL	ANKRD6	BPNT1	ABLIM1	CCDC112	ACOD1	ABR	ADPGK	BNIP1	ADM	CCDC63	AKAP12	ARHGAP32	ADAMTS12	FER1L6	ALS2	ASCC2	ACYP2	C14H7orf50
ANKRD2	AHSG	ABRA	AHR	ADPRS	AKR1D1	ALKAL1	ANGPTL1	AAR2	DUSP6	ADCYAP1	ADGRL3	ASCL1	CCDC42	ADAM10	ATRIP	ABCC2	BMF	ANKRD54	C18H17orf67	ARHGAP45	AGAP2	ARF4	ATP6V1H	ALKBH1	ACAT1	BCHE	ACOX3	ARL2BP	BTBD7	AGR3	ASB3	CCR6	ACACB	CHRNB3	ACVR1B	ACTR1A	ADPRHL1	CAMLG	ADRA2C	CMTM6	ANGPT2	ARHGEF12	ADGB	ILVBL	ARFGAP3	ATP8B3	ADGRG6	C8H1orf112
ANKRD22	AIF1L	ACAD10	AK8	AGPAT4	ALDH1A1	ANXA13	ASZ1	AATF	EPB42	AGBL2	ADIPOQ	ASCL3	CDC45	AGPAT3	CENPS	ABCG1	BMP15	ARL14EP	CDK15	B2M	AHDC1	ARID1A	BAALC	AMN	ACBD6	BSX	ADD1	ATP6V0D1	C2H5orf22	ANKRD13A	ATP1B4	CENPW	ACTG2	CPLX1	ADARB1	ANKRD13C	ANKRD42	CCNG1	ANKRA2	CNOT2	ARMC2	ARID3B	ADGRV1	ITIH5	ARRDC1	BLNK	AKAP7	CERS4
ANXA7	AMIGO3	ACADM	ASTE1	ALDH1A3	ALDH1L2	ATP2C1	ATP6AP1	AATK	FARP1	AHNAK	ADNP	BBOX1	COQ5	AGPAT5	CFAP100	ABCG4	BUB1B	ARSJ	DAP	BCL2A1	AP1B1	ASB5	C20H20orf85	ANGEL1	ACO2	CHAD	ADGRA3	B3GNT9	CCDC40	AOC1	C1H3orf52	COLEC11	ADAM12	CZH5orf51	ADORA2A	ANO8	ANKRD49	CDHR2	ANKS4B	DCST2	ASRGL1	ASAH1	AFDN	LOC100220454	ASDURF	C1QB	ALDH8A1	DNAJC12
ARHGAP19	ANLN	ACAP3	ATPSCKMT	ANKFN1	AMN1	C2H18orf21	ATP6V0A4	ABCA13	FOXA1	ALCAM	ALDH3A2	C5H11orf16	DDT	AGPS	CISH	ABHD12B	C5H11orf49	ATP5F1E	EXTL1	BIN2	AP1S2	ASF1A	C2H7orf25	ANO9	ACOX1	CLIC6	AGA	BBS2	CCN4	ARF3	C3H6orf120	DDX1	ADAMTS2	FBXO4	AFF3	AOPEP	APLNR	CPEB4	ARL14EPL	DNAH8	B3GALNT2	ASH1L	AGO2	LOC100220813	BBS5	C1QC	ALK	HOXD3
AVPI1	APELA	ACCS	BFSP2	ATG7	APAF1	C2H8orf37	BBS10	ABCA7	GABPA	ANKRD66	ANKRD11	C5H14orf39	DERL3	AGT	COPG1	ABHD13	CCDC32	C2CD2	FTCD	BLK	APC2	ATP1B3	CBLN2	AP4S1	ACTR3B	CLTRN	ANAPC4	BCO1	CEP192	B4GALNT4	CAPN11	DHRS7C	ADGRA2	FOCAD	AGTPBP1	ARNT	ARHGAP20	CREBRF	ARSK	DNAJB8	B3GAT2	ATP6V0E1	AHI1	LOC100222056	C7H2orf76	C3	ALKAL2	LOC100219000
BMS1	APOH	ACE	BLOC1S5	ATP2A1	ASCL4	C2H8orf76	BCAP29	ABCB1	GATA1	ANXA2	ANKRD12	CARS2	FBXW8	AHCYL2	DNASE1L3	ABHD15	CCDC86	CABIN1	HACD3	C1HXorf21	ARHGAP23	ATP6AP2	CDKAL1	AQP8	ADAM19	CNGA1	ANKRD37	C11H16orf87	CIBAR1	B4GALT2	CCN6	DTL	ADGRD1	FUT10	AREL1	ASTN2	ARL11	DIS3L2	ASB16	ERICH6	C3H1orf198	C13H5orf15	AK9	LOC100226816	CALCRL	CAPN3	ANGEL2	LOC100220754
BORCS7	ARHGEF28	ACER2	BLVRA	ATP2A3	BICD1	CAP2	BPIFC	ABCB5	HBAA	APCDD1	ARID4A	CBX1	GATC	ALG12	DNMT3B	ABHD17C	CPSF2	CCDC80	IGSF3	C1QTNF8	BAG1	ATP6V1C1	CHMP4C	ASPG	ADAMTS3	FAM160A1	AP5S1	CAPNS2	COLGALT2	BNIP2	CEP43	FBXO28	AEBP1	FXN	ARHGAP5	ATG9A	ARL13B	DOK3	ATG12	FNDC11	C3H6orf58	CAMK2A	AKAP1	LOC100229431	CASP9	CARD11	APOD	LOC100223636
C6H10orf71	ARHGEF4	ACP1	BNIP3L	ATP6V1C2	BID	CCDC127	C18H17orf58	ABCB6	HBAD	ARHGAP24	ARID4B	CCDC122	GNAZ	ALKBH2	EEFSEC	ABHD6	DENND2B	CCK	INTS9	C1S	BAHCC1	BRD7	CIDEA	ATXN3	ADAMTS9	GPRC5C	ARHGEF38	CBFB	CPQ	BTBD10	CEP57L1	FRK	AHNAK2	GAK	ARHGEF6	ATP6V0A1	ASMT	EIF4E1B	BOC	GATA4	CALHM4	CASKIN1	AMMECR1	LOC100231785	CCDC141	CCR5	ATP6V1G3	LOC100225575
C6H10orf95	ASIC4	ACTA2	BTD	AVPR1A	C1AH12orf4	CDKN2AIP	C1AH12orf45	ABCB8	HBE1	ARPC1B	ATP2A2	CCDC34	HNF1A	AMD1	FANCD2	ABI2	DHRS11	CHMP2A	ITGB5	C8H1orf210	BAZ2A	BTF3L4	CNDP2	AVEN	ADI1	HPGDS	ASIC5	CCDC102A	CTNNAL1	CACNG3	CFAP36	GABRR1	ALX4	IFT74	ARL5A	ATXN7L3	ASMTL	EMILIN1	BTF3	HK3	CCNC	CCN5	ANKRD55	LOC101233540	CHRNA1	CD2	BATF3	LOC100225686
CALHM2	ATP1B1	ACTN2	C2H5orf49	BCAR3	C1AH12orf66	CHRAC1	C5H11orf94	ABCE1	HEMGN	CAPSL	ATRX	CCND1	IL17REL	AMER1	G6PC	ABLIM2	EHD4	CNTLN	LOC100220453	CALHM6	BRPF1	C1AH12orf29	CNRIP1	BTG1	ADIPOR2	ITGBL1	ATP10D	CCKAR	DCDC2	CCSER2	CGAS	GFRAL	ANGPT4	LOC100220603	ARPC5	B3GAT1	BEND2	ERGIC1	CARD8	KIF2C	CDC6	CDO1	ANKS6	LOC101233579	CHTF8	CEBPA	BBS12	LOC100226943
CFAP43	BARHL2	ACVR2A	C2H8orf88	BCL9	C1AH12orf73	CHST9	CASTOR2	ABCF1	HPGD	CAV1	ATXN2	CD44	LOC100190348	AMOTL2	GNL3	ABRAXAS2	GALNT16	CSTF1	LOC100225375	CASP7	BUD13	C5H11orf58	CSPP1	C15H22orf39	ADK	KCNJ13	BANK1	CDH13	DENND2D	CERK	CNIH3	GJB7	ANGPTL2	LOC100224449	ARPP19	BCL11B	BRCA2	FAM83G	CBWD1	LBX1	CEP162	CETN3	ARGLU1	LOC105760267	CIR1	CMTM7	BMP5	LOC100228762
CHAF1B	BARX2	ACVR2B	CASD1	BCL9L	C1QTNF6	CLEC3B	CBY1	ABCF2	IGSF5	CAVIN2	B3GNT7	CD81	LOC100190349	ANKH	HYAL3	ACAA1	GNAT1	DDOST	LOC100228825	CBX2	C1H2orf49	CAMK2N1	DBF4	C5H14orf132	ADPRH	KL	BTC	CENPN	DTNA	CHMP7	CRNKL1	GNG4	ANTXR2	LOC100230481	ASAP1	BCORL1	C1R	FAXDC2	CCDC152	LOC100219846	CFAP206	CHCHD3	ARNTL2	LOC105760508	COL28A1	CSF1R	BPGM	LOC105759757
COMTD1	BCAS1	ADAD1	CCDC126	BLM	CABCOCO1	CTHRC1	CCDC107	ABHD11	KCNA4	CCDC146	BAZ2B	CDKN1C	LOC100222749	ANKIB1	IL17RC	ACAA2	GPR176	DDRGK1	LOC100230707	CCDC69	CAD	CAPZA1	DCAF13	C5H14orf180	ADRA1A	LMX1A	C1QTNF12	CIDEC	EDEM1	CHST1	CYRIA	GTF2H5	ANXA1	LOC100232251	ATOH8	BHLHE22	CASQ2	FNDC9	CCNO	LOC100220191	CMTR1	CHD4	ARPP21	LOC115490569	CPS1	CTSS	C3H1orf131	LOC105759916
D1DR	BEND7	ADAM9	CDCA7L	BLOC1S3	CAPS2	DDC	CCDC13	ABHD14A	LMBR1L	CCDC148	BBX	CEP68	LOC100225628	ANKS1B	IL17RD	ACAD9	GSKIP	DENND1A	LOC100230782	CCL17	CAP1	CCDC47	DECR1	CA12	AHCY	LMX1B	C4H4orf54	CMTR2	F13A1	CLCN7	DAO	HPCAL1	ANXA5	LOC105760824	ATP2B2	C1QTNF3	CBY2	FNIP1	CDC37L1	LOC100220634	COL21A1	CHD6	ATAD5	LOC115491594	CWC22	CYSLTR1	C4AH8orf48	LOC115491769
DCLRE1A	C6H10orf90	ADAMTS1	CDCP1	BUB1	CCDC71L	E2F5	CD36	ABHD18	LOC100190585	CCDC166	BCLAF1	COPB1	LOC100232469	ANKZF1	LOC100219182	ACADL	HARBI1	DENND3	LOC100231735	CCR4	CC2D1A	CDH23	DSCC1	CABP2	AIMP2	LOC100225286	CC2D2A	CTRL	F3	CLTB	DYNC2LI1	IAH1	ANXA6	LOC115490943	BAG5	CAPN15	CCDC138	GABRA6	CEP120	LOC100220738	COL9A1	CNBP	ATG4B	LOC115491624	DHRS9	EPCAM	CALHM5	LOC115491912
EPHX2	CARNS1	ADAMTS10	CFAP410	C1H13orf42	CCL28	E2F8	CMSS1	ABHD2	LOC100219387	CCDC17	BIRC2	CRYBB3	LOC115492597	ANO10	LOC100219242	ACAP2	IVD	DOK6	LOC101233115	CCR7	CCNH	CENPK	ERP44	CALCB	AK3	LOC100228216	CD38	DRC7	GABBR2	COBLL1	E2F6	IYD	ARHGAP28	LOC115491096	BMERB1	CARMIL2	CCDC82	GATA6	CHRNA2	LOC100221395	DISC1	CREBBP	ATXN7L1	LOC115491660	DNAJC10	EPOP	CCN2	LOC115491921
EXOSC3	CD151	ADAMTS14	CHCHD7	C26H1orf162	CDK5RAP3	ESRP1	COLCA2	ABHD5	LOC100219825	CCDC170	BOD1L1	CTSD	LOC115493817	ANP32E	LOC100221170	ACBD3	JDP2	DUSP27	LOC101233194	CD247	CCT7	CHMP4B	ETFDH	CAPN7	AKAP8L	LOC100228408	CDS1	ELMO3	GASK1A	CRTAC1	EHHADH	LOC100218258	ARHGAP40	LOC115491119	BOK	CBARP	CCDC83	GIPR	CLBA1	LOC100223012	DONSON	CRELD2	B3GALT6	LOC115491662	DPP10	FBXO22	CD109	LOC115492425
FAM204A	CDH19	ADAMTSL3	COBL	CADPS2	CENPM	FADS6	CRADD	ABHD8	LOC100223725	CCDC187	BPHL	DEAF1	LOC115493887	AP1M1	LOC100225968	ACBD7	LOC100223914	EEF1B2	LOC115490699	CD274	CDC42	CHMP5	FABP1	CCDC177	AKNA	LOC100231076	CENPC	EMC8	GEM	CTXN1	ERICH1	LOC100220484	ARRDC4	LOC115491151	BTBD8	CDK12	CCDC89	GNPDA1	CMC1	LOC100224801	EFCAB2	CRTAP	BAP1	LOC115491674	DPP4	FERMT1	CD93	LOC115493331
FGF8	CENPF	ADAMTSL5	CROT	CALCR	CEP83	FGD5	CRB1	ABL1	LOC100224239	CD24	BRAF	DENND5A	LOC115497306	AQP4	LOC100226935	ACER1	LOC100224870	EEF1D	LOC115490732	CD28	CEP85	CHN1	FAM110B	CEP128	AKNAD1	LOC100232495	CEP135	EXOSC6	GFOD1	DCTN4	EZR	LOC100223159	ATP2C2	LOC115491190	C13H5orf24	CDKN2C	CCDC90B	GPX3	COMMD10	LOC100226032	ELP3	CSMD2	BTAF1	LOC115492297	DUSP19	FYB1	CDK19	LOC115493630
FGFBP3	CENPV	ADARB2	DEK	CAV3	CHPT1	FRRS1L	CYREN	ABLIM3	LOC100224585	CDCA8	BRD3	DNAJC24	LOC115497360	AQP9	LOC100230077	ACKR2	LOC115495429	EIF4A2	LOC115490930	CD3E	CHD3	CISD1	FIGNL1	CHGA	ALG1	LOC105758586	CEP44	FAAP24	GPLD1	DGKK	FAM161A	LOC100224575	ATP6V0A2	LOC115491219	C2CD5	CELF3	CD58	HMGCS2	DBH	LOC100226079	EPM2A	CYFIP2	BZW1	LOC115492305	DYNC1I2	GNGT2	CENPH	LOC115494749
GDF2	CEPT1	ADAT1	DIPK1C	CCBE1	CMAS	GADL1	DCLRE1C	ABRAXAS1	LOC100229126	CDHR3	BRSK2	DUSP8	LOC115497396	ARF1	LOC115491520	ACOT7	LOC115495537	ERP29	LOC115490939	CD4	CIC	CNEP1R1	GAS8	CHID1	ALG14	LOC115492234	CFAP99	FANCA	IVNS1ABP	DND1	FBLN7	LOC100232533	B4GALNT3	LOC115491229	CAB39L	CERS1	CD80	HMMR	DDX4	LOC100227365	ERMARD	DAB2IP	C12H3orf18	LOC115492350	FAM180B	GPR18	CENPQ	LOC115495594
GNA11	CHST3	ADCY5	DLX5	CDH8	COG5	GDAP1	DNAJC2	ABT1	LOC101233692	CDHR4	CACNG2	EHF	LOC116806604	ARHGAP17	LOC115493369	ACOT9	LOC115495624	ETV4	LOC115490940	CD40LG	CINP	CNIH1	GGH	CHP1	ALKBH4	LOC115493496	CHRNA9	FASTKD2	KCNH6	DTWD2	GGACT	LOC105759122	B4GALT5	LOC115491233	CACNA1G	CIRBP	CDADC1	HNRNPAB	DMAC2L	LOC100229371	FAM228B	EBAG9	C7H2orf66	LOC115492502	FAM181A	GPR34	CHAC2	LOC115495786
GOLGA7B	CLDN11	ADCY8	DNAH11	CEP41	CRYZ	GLB1	DNAL4	ACAD8	LOC115491162	CFAP161	CADM3	ERI2	LOC116806605	ARID3C	LOC115495026	ACOX2	LOC115497964	EXOSC10	LOC115491104	CD5	CNTN2	COMMD3	GRHL2	CIPC	ALMS1	LOC115494256	COMMD8	GHRHR	KIAA0319	EED	GLP1R	LOC115493570	BBS7	LOC115491291	CACNB4	CLK2	CDC16	HTR4	ELOVL7	LOC100229676	FAM89A	EIF3A	CARF	LOC115492522	FASTKD1	GRAP	CNPY3	LOC115496260
GPRIN2	CNKSR3	ADGRL2	DPH3	CHD5	DBX2	HEY1	DRAM1	ACADSB	LOC115494341	CFAP20DC	CCAR1	FBXO40	LOC116806628	ARMC1	LOC115495856	ACSL1	LOC116806606	FABP7	LOC115491887	CD6	CPSF7	COPS2	GRID2IP	CLEC14A	ALPK1	LOC115494994	COQ2	GINS3	KIF5C	EFNA3	GLT1D1	LOC115493709	BMP3	LOC115492139	CAMK4	CORO2B	CEP126	IGFALS	FANCC	LOC101234190	FBXL4	EIF3M	CASP2	LOC115492815	GALNT3	IFI30	COG2	LOC116806626
HMCN2	CNP	ADRA1B	DPT	CHL1	DEPDC4	IMPA1	ELK3	ACBD4	LOC115494403	CFAP221	CCDC85A	FGF19	LOC116807873	ARMT1	LOC115496927	ACSL4	LOC116807451	FAU	LOC115493437	CD7	CXXC1	CSPG4	HEYL	COQ6	ALX3	LOC115495486	CRYAA	GPT2	LACTB2	ENGASE	GSX1	LOC115494283	BMP4	LOC115493675	CAMTA1	CSNK1G2	CEP63	IL12B	FBN2	LOC105758748	FUT9	EIF4G3	CCDC66	LOC115492816	GCG	IKZF1	COQ3	LOC116806629
HPS6	CPSF4L	ADRA2A	DPY19L1	CHRM5	DMC1	LOC100190123	EPHX4	ACER3	LOC115494853	CFAP46	CELF1	FGF3	LOC116808618	ARV1	LOC115496928	ACSS2	LOC116808474	FBXL18	LOC115493461	CD74	DAXX	CTNND1	IMPACT	CPSF1	ANKDD1B	LOC115496814	CSGALNACT1	HSD11B2	LAPTM4B	ERLIN1	GTF2A1L	LOC115494295	BNC2	LOC115494088	CANT1	DECR2	CFAP44	ITGB1	FBXW2	LOC105758791	GCFC2	FAM193A	CCL20	LOC115493602	GPR1	IRF8	COQ8A	LOC116806643
HPSE2	CRYAB	ADTRP	EFCAB1	COPG2	DNAJB9	LOC100219910	EXTL2	ACKR4	LOC115495125	CFAP47	CELF4	FSHB	LOC116808975	ATG13	LOC115496936	ACTA1	LOC116808517	FGGY	LOC115493741	CD79B	DCAF8	CUL3	LOC100220197	CPT1A	ANKS1A	LOC115497644	CWH43	HSDL1	LOC100189937	EXOC3L1	GUCY2C	LOC115494316	C1QTNF1	LOC115495481	CC2D1B	DHX38	CFAP91	JADE2	FETUB	LOC105758851	GEN1	FBXO38	CCNL2	LOC115494395	GTF3C3	ITGB2	CRIPT	LOC116807108
HSPA12A	CTNNA3	AGBL1	ENKUR	CRHR2	DUS4L	LOC100220322	FAM210A	ACLY	LOC115496060	CFAP54	CHD1	GAL	LOC116809018	ATG5	LOC115496990	ACTB	LPAR2	FOXD3	LOC115494293	CD83	DDB1	DCHS1	LOC100221052	CREB3L1	ANKS3	LOC115497777	CYTL1	HSF4	LOC100218250	FAM189A1	HERPUD1	LOC115494323	C1QTNF7	LOC115495593	CCDC59	DNAJC6	CKAP2	KCTD16	FKTN	LOC105759428	GJE1	FOXO3	CCNT2	LOC115494402	HCRTR2	KLHL6	DDO	LOC116807110
INA	CTTNBP2NL	AGPAT2	ENTPD3	CXCL14	EFHB	LOC100220507	FERMT2	ACOT11	LOC115496587	CFAP65	CLNK	GALNT18	NARS1	ATN1	LOC115497013	ACTC1	LRRC57	GALR2	LOC115494539	CDCA3	DDX20	DCUN1D5	LOC100221139	DAGLA	AP3M2	LOC116806983	DAPP1	IL17C	LOC100218287	FAS	IFNGR1	LOC115494333	C26H6orf132	LOC115496869	CCDC65	DSTYK	CLCN1	KIF20A	FN3KRP	LOC105759945	HDDC2	GALNT17	CDC14B	LOC115494406	HEPACAM2	KPNA4	EML4	LOC116807131
KAZALD1	DAAM2	AGTR1	EPDR1	CYCS	ETFBKMT	LOC100224151	FFAR4	ACOT12	LOC115497839	CFH	CLOCK	GATD1	PRKAB1	ATXN10	LOC115497667	ACTL6A	MBIP	GLI2	LOC115494775	CEP55	DHX37	DNAJC1	LOC100221432	DCAF4	ARAP2	LOC116808039	DCLK2	KATNB1	LOC100220330	FBXL5	IL20RA	LOC115494466	C7	LOC116806727	CHM	DTNB	CLDN10	LARS1	FNTA	LOC105760879	HHAT	GHITM	CEBPZ	LOC115495239	ITGAV	LAPTM5	EML6	LOC116807134
KERA	DUS2	AHRR	ETS2	CYP2J40	FAM118A	LOC100226992	FMNL1	ACOT8	LOC115498308	CLEC19A	CMIP	GPX2	PXN	AURKA	LOC115498366	ACTR2	MED6	GLO1	LOC115495083	CFLAR	DLGAP3	DNAJC21	LOC100223994	DDB2	ARFGAP2	LOC116808157	DCTD	KLHDC4	LOC100223101	FBXO8	IL22RA2	LOC115494517	CAPN9	LOC116806728	CLSTN2	DVL3	CLN5	LOC100217673	FOXE1	LOC115490962	HINT3	GIGYF2	CEMIP2	LOC115496634	KLHL23	LCP1	ENPP3	LOC116807169
KIF11	EGFLAM	AIDA	EXOC2	DCAF6	FBLN1	LOC105760834	FUT4	ACSBG1	LOC115498454	CLIC3	CMTM4	HIPK3	RAB36	B3GALT1	LOC116808862	ACTR3	NXNL1	GMEB1	LOC115495267	CNN2	DMWD	DSTN	LOC100224576	DDX24	ARHGAP29	LOC116808473	DKK2	KLHL36	LOC100228221	FBXW5	KCNK17	LOC115494532	CASR	LOC116806756	CLVS2	EFNB2	CNGA3	LOC100218541	FSD1L	LOC115491111	HSP90AB1	GOLGA7	CEP290	LOC115497172	KLHL41	LETMD1	ENTPD6	LOC116807271
KNDC1	ELOVL1	AIFM3	FAM180A	DDX51	FBXO7	LOC115491679	GAL3ST2	ACSF2	LOC116806810	CNTNAP4	CNOT4	HPS5	RASD2	BATF	LOC116808881	ACVR1	PACSIN3	HSPE1	LOC115495488	CRTAM	DNM2	DTNBP1	LOC100224987	DEGS2	ARHGAP42	LOC116808536	EMCN	LOC100190115	LOC100232645	FDX1	KHDRBS2	LOC115494744	CASS4	LOC116806783	COG6	EPB41L1	CNMD	LOC100223312	GABRP	LOC115491165	IRAK1BP1	GPATCH8	CEP78	LOC115497613	LCT	LOC100217705	FAM162B	LOC116807275
LDB3	EMB	AIG1	FAM221A	EDA2R	FDXACB1	LOC115493719	GLDN	ACSF3	LOC116807483	COL4A3	COL8A1	INCENP	RITA1	BEND3	LOC116809068	ACVR1C	RAD9B	IFT52	LOC115495512	CTLA4	DPP9	DYNC1LI1	LOC100227844	DGLUCY	ARHGAP6	LOC116809085	ERI1	LOC100218405	LOC105759025	FEM1A	KIAA0586	LOC115495133	CAST	LOC116806788	COLEC10	EPHB1	COL4A1	LOC100225213	GFM2	LOC115492192	LOC100190440	IFFO2	CEP85L	LOC116806956	LCTL	LOC100218724	GDF7	LOC116807286
LOC100218590	ENPP2	AJAP1	FASTKD3	ENKD1	FGF4	LOC115493743	GPR37	ACTG1	LOC116809045	COL4A4	COMMD9	KIF18A	RNFT2	BEND4	LOC116809157	ADA2	RIC3	ISCU	LOC115495545	CTSE	DSCAML1	EDF1	LOC100227924	DNAL1	ARL6IP1	LOC116809117	EVC	LOC100220861	LOC115490603	FER	KIAA1841	LOC115495367	CCDC3	LOC116806840	COTL1	ERP27	COL4A2	LOC100225784	GID8	LOC115492295	LOC100219265	KMT2D	CHPF	LOC116807053	LOC100190105	LOC100222365	GGPS1	LOC116807395
LOC100218933	ENPP6	AK5	FKBP5	FRAS1	FGF6	LOC115493756	GPR85	ACTL6B	MIR125-2	COL4A6	CPEB3	KMT5B	SLC5A1	BEST3	LOC116809172	ADAL	TADA2A	KDELR2	LOC115495670	CYTIP	EAF1	EIF1AX	LOC100231369	EAPP	ARL6IP5	MFRP	EVC2	LOC100221838	LOC115492889	FEZF2	KIZ	LOC115495393	CCDC78	LOC116809066	CRKL	ETNK2	COLQ	LOC100226723	GOLM1	LOC115492499	LOC100221212	LOC100218016	CHPF2	LOC116807101	LOC100190610	LOC100223649	GPATCH11	LOC116807417
LOC100219821	ERMN	AKAP10	FKBP9	FRMPD3	GBX2	LOC115493770	HAL	ACTR10	MISP	COPB2	CREB3	LGR4	SNRNP25	BET1	MCM2	ADAM17	TRMT61A	KDM6A	LOC115495754	DHX58	EFNA2	ENY2	LOC100232461	EIF2AK4	ARPC2	MYB	EXOC1L	LOC100223250	LOC115493656	FJX1	LCLAT1	LOC115495615	CCN3	LPIN1	DCLK1	ETV5	COMMD6	LOC100226810	GPR55	LOC115492560	LOC100223710	LOC100220617	CHST4	LOC116807107	LOC100219447	LOC100224303	GPATCH4	LOC116807418
LOC100223789	EXOG	AKIRIN2	FZD1	GAB2	GLIPR1	LOC115493814	HEBP1	ACTR5	MYLK2	CPA6	CRTC1	LMO2	SUMF1	BLZF1	MST1R	ADAM22	TRPM5	KYAT1	LOC115495889	DOCK8	EGR2	FAM3C	LOC101233268	EIF2B2	ARVCF	OFD1	FAM149A	LOC100228529	LOC115493724	FLOT1	LDAH	LOC115497457	CD9	LRRC10	DCLK3	EXTL3	CRACDL	LOC100227536	GRAMD2B	LOC115492562	LOC100223718	LOC100223308	CHUK	LOC116807123	LOC100219865	LOC100226213	GPR137B	LOC116807419
LOC100227500	FA2H	ALDOB	GATAD1	GABRB3	GSAP	LOC115493832	HESX1	ACVRL1	OPN1SW	CPAMD8	CSE1L	LOC100218721	TMEM204	BRD9	MUSTN1	ADAM23	TSSC4	LAPTM4A	LOC115495912	DTX3L	EGR3	FAM8A1	LOC115493654	ENTPD5	ASH2L	OGN	FAM166A	LOC100228584	LOC115493768	FOXP1	LOC100218614	LOC115497830	CD99	MIR101-1	DENND5B	FBXO41	CRACR2A	LOC100228109	HACD4	LOC115493004	LOC100224932	LOC100225196	CLK4	LOC116807366	LOC100220375	LOC100227999	GRHL1	LOC116807424
LOC100228060	FGFR2	ALG11	GMNN	GHR	GTSE1	LOC115493833	HMGXB4	ADAM15	PIM1	CPLX3	CSTB	LOC100224235	TRMT2A	C12H3orf14	NAA80	ADAMTS13	YPEL4	LINS1	LOC115495916	EIF2AK2	EIF2S3	FARS2	LOC115493663	ERICH5	ATAD2B	OTX2	FBXO47	LOC100229107	LOC115493772	FOXP2	LOC100220068	LOC115498339	CDC40	MIR2954	DHH	FBXO42	CRYL1	LOC100229528	JMY	LOC115493213	LOC100225542	LOC101233900	COL12A1	LOC116807432	LOC100224270	LOC100228653	HAO1	LOC116807430
LOC100228612	FOXB1	ALG8	HACL1	GREB1	GXYLT1	LOC115493834	KCNE4	ADAM8	PTPRM	CPNE7	CTNND2	LOC100224825	UPB1	C1H3orf38	NEK4	ADAMTS15	ZFYVE19	LOC100220927	LOC115495931	EOMES	ELOA	FHIT	LOC115493704	EVL	ATF4	PCP2	FGB	LOC100230391	LOC115493796	GART	LOC100225817	LOC116808019	CDHR5	PCK1	DIP2A	FGF9	CTC1	LOC100229609	KY	LOC115493286	LOC100228263	LOC101234054	COL24A1	LOC116807536	LOC100225287	LOC100231703	HBS1L	LOC116807464
LOC100229828	FYCO1	ALKBH5	HSBP1L1	GRIA1	HELB	LOC115493837	LCA5	ADAMTS17	RFESD	CRB2	CTSB	LOC100224883	VANGL2	C2H6orf62	NFYC	ADAMTS8		LOC100223058	LOC115495939	EPSTI1	ETAA1	FKBP15	LOC115493744	EXT2	ATF7IP	PDC	FGF20	LOC100230797	LOC115493824	GATA5	LOC100226679	LOC116808149	CENPP	PJA2	DIP2B	FRMD5	CTPS2	LOC100232010	LBR	LOC115493492	LOC100228466	LOC115491175	COL27A1	LOC116807579	LOC100228106	LOC100231797	HTR1B	LOC116807465
LOC100230461	GAB1	AMIGO2	HSPA4	GRM1	ICOSLG	LOC115493839	LIN7A	ADAMTS19	RHAG	CRYBB2	CWF19L2	LOC100226232		CA5A	NPRL2	ADAMTSL1		LOC100224572	LOC115496265	EVI2A	FAM110D	FUNDC1	LOC115493777	F2	ATG3	PLCH1	FGFBP1	LOC101234219	LOC115493846	GLI1	LOC100231107	LOC116808154	CEP19	PLGRKT	DKK3	FYTTD1	CTSC	LOC101234089	LOC100217561	LOC115493725	LOC100228872	LOC115492481	CRAMP1	LOC116807640	LOC100228501	LOC101233188	IRX4	LOC116807467
LOC105759360	GCLC	AMOTL1	IGFBP1	HEXD	IFT27	LOC115493840	LLPH	ADAMTS5	RIPOR3	CRYBG1	DDX52	LOC100229562		CALM1	NT5DC2	ADAMTSL2		LOC100226846	LOC115496575	FARP2	FAM189B	GABARAPL2	LOC115493782	FAM98B	ATG4C	PTGDR	FGFBP2	LOC105758732	LOC115493865	GPI	LOC100231535	LOC116808160	CFAP53	PRR16	DLD	GALNT13	CUL4A	LOC105758763	LOC100218902	LOC115493831	LOC100230903	LOC115496120	CREBZF	LOC116807711	LOC100229685	LOC101233626	ITGB1BP1	LOC116807510
LOC115491889	GLIPR2	AMZ1	INVS	HK1	IRAK4	LOC115493853	LOC100190084	ADAMTS6	SESN2	CYP11A1	DHX40	LOC100229613		CAPN8	P2RX5	ADCK1		LOC100227226	LOC115496971	FBXO43	FAM222A	GCSH	LOC115493795	FCF1	ATMIN	PTPRQ	FGL1	LOC105758733	LOC115493875	GZF1	LOC101233500	LOC116808161	CHRDL1	PRR35	DLG1	GANAB	DAGLB	LOC115490863	LOC100218989	LOC115494011	LOC100232332	LOC115496926	CRYBA4	LOC116807796	LOC100230314	LOC101233846	KIF25	LOC116807537
LOC115495750	GNG10	ANAPC10	ITGA9	HMGCR	IRX1	LOC115493863	LOC100217693	ADAP2	SLC25A37	DAB2	DOCK1	LOC100231529		CAPZA2	PPM1M	ADCY2		LOC100228587	LOC115496973	FCER1G	FCSK	GJA9	LOC115493812	FSIP1	ATOX1	PTX3	GABRB1	LOC115492115	LOC115493881	HCN3	LOC101233662	LOC116808167	CLDN16	RNF170	DNAJC15	GATAD2B	DCUN1D2	LOC115493469	LOC100219442	LOC115494254	LOC105759120	LOC115497884	DDX3X	LOC116808204	LOC100231025	LOC105759143	KLHL31	LOC116807546
LOC115495755	GPR62	ANGPT1	JAK1	HMGCS1	JOSD1	LOC115493874	LOC100220790	ADAR	SLC27A3	DCST1	DPYSL2	LOC100232375		CCDC117	RSPH1	ADCY9		LOC100229350	LOC115497223	FLI1	FOSB	GNPTG	LOC115493841	GLRX5	ATP23	RARRES1	GALNTL6	LOC115492307	LOC115493905	IL6ST	LOC105758955	LOC116808172	CLIC4	RNF180	DPYSL5	GC	DDIAS	LOC115494352	LOC100220295	LOC115494484	LOC105759123	LOC115498265	DDX5	LOC116808210	LOC100231496	LOC105760522	LOC100224332	LOC116807548
LOC115495762	HAPLN2	ANGPTL3	KIAA1143	HS3ST6	KIN	LOC115493906	LOC100224131	ADCY6	SLC4A1	DMRTA2	DYNLL2	LOC101233494		CCDC28A	SMIM4	ADCYAP1R1		LOC100230192	LOC115497837	FYB2	FSCN1	GTF2A2	LOC115493862	GPR68	ATP5F1C	RBM47	GAR1	LOC115492309	LOC115493912	KANSL1L	LOC115493553	LOC116808452	CMTM3	SLC38A9	DUSP7	GGA1	DDX10	LOC115494556	LOC100220727	LOC115494525	LOC115491112	LRP1	DGCR6L	LOC116808238	LOC100232776	LOC115490742	LOC100225095	LOC116807555
LOC115495784	HEATR5A	ANK1	KIAA1217	HTR2B	LMOD2	LOC115493909	LOC100224417	ADCY7	SPTB	DNAAF6	EEA1	LOC105759274		CCNB2	SPCS1	ADGRB1		LOC100230622	LOC115497918	GABRR3	FSTL5	GTF2B	LOC115493890	GSG1L	ATP5MC3	RLBP1	GIMD1	LOC115494308	LOC115493967	KAT2A	LOC115494258	LOC116808616	CNN3	ST8SIA4	ECI2	GRIN2C	DEUP1	LOC115494557	LOC100221623	LOC115494586	LOC115492382	LYRM7	DLAT	LOC116808247	LOC101233348	LOC115491116	LOC100227863	LOC116807556
LOC115495803	HMOX1	ANKDD1A	KIF15	ID2	LOC100217677	LOC115493913	LOC100225270	ADD2	TFRC	DNAH1	EIF5B	LOC105759305		CCZ1	TKT	ADGRB3		LOC100231026	LOC115498476	GALNT6	GATAD2A	HIBADH	LOC115493927	GSTZ1	ATP5MD	RRM2	GRXCR1	LOC115496752	LOC115493971	KIF27	LOC115494279	MANEA	COL15A1	TBX4	EEF1A1	GTPBP10	DHRS12	LOC115497040	LOC100221796	LOC115494692	LOC115493859	LZTS3	DMRT1	LOC116808423	LOC101234247	LOC115492318	LOC100231213	LOC116807598
LOC115495805	IHH	ANKEF1	LANCL2	IDO2	LOC100219177	LOC115493917	LOC100227069	ADGRB2	TRPT1	DNAH9	ELOVL2	LOC105759308		CD82	TMEM40	ADGRG2		LOC101234217	LOC115498479	GCH1	GPR17	HMGN5	LOC115493949	IFT43	ATP5ME	SLC13A1	GTF2E2	LOC115496758	LOC115494127	KIRREL3	LOC115494280	MAP3K21	COL1A1	THAP1	ELAVL4	HAT1	DLG2	LOC115497042	LOC100221889	LOC115494693	LOC115494255	MACF1	DNAAF1	LOC116809227	LOC105758928	LOC115493463	LOC101233698	LOC116807603
LOC115495806	IL12RB1	ANKK1	LGALSL	IGF1R	LOC100220543	LOC115493947	LOC100227296	ADGRF5		DNAI1	ELOVL5	LOC105760050		CDC123	TRAIP	ADM2		LOC105758753	LOC116806668	GFI1	GRTP1	IFT80	LOC115493964	IFTAP	ATP5MF	SLC13A4	GUCA1C	LOC115496768	LOC115495070	KLHL21	LOC115494329	MOCS1	COL1A2	TMEM171	ELK4	HAUS6	DNAJB13	LOC115497043	LOC100227272	LOC115494867	LOC115494257	MAPK4	DNAJC16	N6AMT1	LOC105759421	LOC115497190	LOC101234018	LOC116807604
LOC115495809	INHBB	ANO1	LOC100218152	IKZF2	LOC100220586	LOC115493952	LOC100227411	ADGRG3		DUSP5	EP300	LOC115490544		CDC42EP1	UBA7	ADO		LOC115491118	LOC116806778	GPR132	GSE1	ING2	LOC115493968	INSC	ATP5PB	SLC16A8	GUF1	LOC115496773	LOC115495217	LARGE2	LOC115494365	MPZL2	COL20A1	TMEM174	ELOC	HDAC2	DOCK9	LOC115497044	LOC100227297	LOC115495055	LOC115494263	MEF2A	DYSF	NIPAL4	LOC105760283	LOC115498095	LOC105759105	LOC116808178
LOC115495810	KIAA0040	ANOS1	LOC100219050	INSIG1	LOC100220650	LOC115493969	LOC100229115	ADGRL4		EEF1E1	ERLIN2	LOC115491013		CDC5L	UBC	ADORA2B		LOC115491526	LOC116806831	GPR174	GTPBP6	ING3	LOC115493976	INSM2	ATP5PF	SLC6A20	HELQ	LOC115496781	LOC115495661	LNX1	LOC115494414	NBAS	COL3A1	UBQLN1	EPS15	HHIPL2	ECRG4	LOC115497045	LOC100228906	LOC115495570	LOC115494290	METTL9	DYTN	NTS	LOC115492659	LOC116807531	LOC115494259	LOC116808575
LOC115495813	KIAA1210	ANTXR1	LOC100220758	INTS10	LOC100221944	LOC115493994	LOC100229197	ADIPOR1		EFCC1	FADS1	LOC115493358		CDK7	ZMYND10	ADRA1D		LOC115492334	LOC116807021	GPR65	HNRNPL	ITFG1	LOC115493985	ISOC1	ATP6V0C	TF	HELT	LOC115496786	LOC115495774	LOC100190505	LOC115494423	NFKBIE	COL6A1		F2RL1	HIP1	EDAR	LOC115497049	LOC100228957	LOC115495617	LOC115494294	MPRIP	DZIP1	REEP4	LOC115494376	LOC116809291	LOC115494289	LOC116808647
LOC115495864	KLHL38	ANXA11	LOC100220976	IP6K2	LOC100222013	LOC115493995	LOC100230156	ADNP2		EFHC1	FADS2	LOC115493424		CERT1		ADSS2		LOC115492573	LOC116807145	GPR87	HNRNPM	KRAS	LOC115493988	JMJD7	ATP6V1D	TMEM140	HEPH	LOC115496790	LOC115496247	LOC100219030	LOC115494434	NT5DC1	COL6A2		FAM135A	IRF2	EEF1AKMT1	LOC115497051	LOC100229524	LOC115495656	LOC115494313	MRPL42	EDRF1		LOC115494923	LOC116809304	LOC115494340	LOC116808703
LOC115496249	LCAT	AOX1	LOC100223445	IRAG1	LOC100222415	LOC115493999	LOC100231144	ADPRM		EFHD1	FAM126B	LOC115493613		CLASP2		AEN		LOC115493360	LOC116807456	GSDMA	ILF3	KRR1	LOC115495625	KCNJ11	ATR	TMEM72	HGSNAT	LOC115496794	LOC116807045	LOC100220428	LOC115494454	NUP133	CPED1		FAM13C	KCNN1	EGFL6	LOC115497063	LOC100230026	LOC115495898	LOC115494334	MRPS18C	EI24		LOC115495124	LYN	LOC115494344	LOC116808779
LOC116808253	LGR5	AP1M2	LOC100225774	KCNG3	LOC100223480	LOC115494004	LOC100232386	ADRB2		ENC1	FAM20B	LOC115493888		CLPTM1L		AFF2		LOC115493413	LOC116807751	GZMA	INO80B	LEPROTL1	LOC115496840	KCNK13	ATXN1	TRIM45	HOPX	LOC115496796	LOC116807768	LOC100222387	LOC115494483	PEX3	CPXM2		FAM20A	KCNS1	ELMOD1	LOC115497065	LOC100231014	LOC115495926	LOC115494349	NCS1	ELAVL2		LOC115495243	MIR29A-2	LOC115494358	LOC116809020
LOC116808417	LHFPL3	APLN	LOC100226474	KCNK10	LOC100224455	LOC115494006	LOC105758548	ADRM1		ENO4	FAM20C	LOC115494035		CNTN1		AFF4		LOC115493465	LOC116808018	HOXB9	INSL5	LOC100217539	LOC115496849	KNL1	ATXN1L	TTR	HTRA3	LOC115496810	LOC116807770	LOC100224354	LOC115494492	PPIL4	CPZ		FAR1	KIAA0100	EMG1	LOC115497066	LOC100231439	LOC115496040	LOC115494356	NMD3	ELMOD3		LOC115495482	MPEG1	LOC115494373	LOC116809087
LOC116808540	LOC100190237	APLP2	LOC100228270	KIF26B	LOC100224928	LOC115494016	LOC105758584	ADSL		ENPP1	FBRSL1	LOC115494315		COL18A1		AFG1L		LOC115493619	LOC116808084	IFI35	KANSL1	LOC100228308	LOC115497124	LGMN	AXIN1	TYRP1	IL15	LOC115496836	LOC116807780	LOC100225471	LOC115494523	PPP1R14C	CRABP2		FBXL17	KIF1A	ENDOD1	LOC115497067	LOC100231824	LOC115496698	LOC115494359	NOP58	EMC1		LOC115495933	MYO1F	LOC115494383	LOC116809180
LOC116808553	LOC100218887	APMAP	LOC100228345	KLHL25	LOC100225970	LOC115494023	LOC105758607	ADSS1		ESR2	FBXO11	LOC115494467		COL4A5		AFG3L2		LOC115493901	LOC116808085	IFI6	KCNH2	LOC100229913	LOC115498300	LOC100217691	AZI2	UPP2	KLB	LOC115496853	LOC116807853	LOC100226600	LOC115494616	QRSL1	CRIP1		FBXO32	KLHL18	EPHA1	LOC115497078	LOC100232465	LOC115496761	LOC115494393	NSF	EPB41L4A		LOC115495948	NCF2	LOC115494386	LOC116809185
LOC116808555	LOC100220645	APOB	LOC100231534	LCMT2	LOC100226418	LOC115494096	LOC105759161	AEBP2		F2R	FBXO33	LOC115495054		COL9A2		AFTPH		LOC115494161	LOC116808110	IFNG	LAMP1	LOC100230612	LOC116806751	LOC100219136	BAMBI		LIAS	LOC115496874	LOC116807855	LOC100232323	LOC115494710	RNASET2	CRLF1		FLT1	KNOP1	EPHA3	LOC115497083	LOC101233531	LOC115496833	LOC115494461	OTUD3	EPHA7		LOC115495954	P2RY12	LOC115494444	LOC116809224
LOC116808557	LOC100220740	APPL2	LOC101234087	LCORL	LOC100227084	LOC115496205	LOC115490816	AFAP1		FAF2	FBXW11	LOC115495350		CPE		AGFG1		LOC115494353	LOC116808211	IKZF3	LDB1	LOC100231488	LOC116806921	LOC100220969	BASP1		LOC100190442	LOC115496892	LOC116807871	LOC100232561	LOC115495280	SAMD3	CRYGS		FMN2	KSR2	ESD	LOC115497099	LOC101233943	LOC115496912	LOC115494509	PALB2	ERCC6L2		LOC115495957	P2RY13	LOC115494445	MAT1A
LOC116808577	LOC100221075	AQP1	LOC105758975	LHFPL2	LOC100229225	LOC115496226	LOC115490959	AFF1		FAM3D	FLOT2	LOC115495359		CPLANE2		AGK		LOC115494477	LOC116808230	IL10RA	LEMD2	LOC101234091	LOC116807760	LOC100221884	BAZ1A		LOC100190592	LOC116807032	LOC116807891	LOC101232863	LOC115495769	SESN1	CTDSPL2		GABRB2	LEPROT	EXOSC8	LOC115497107	LOC101233989	LOC115496964	LOC115494694	PITPNM2	ERN1		LOC115495962	P2RY6	LOC115494452	REC114
LOC116809292	LOC100221865	AQP11	LOC105758977	LHX6	LOC101232981	LOC115496231	LOC115491077	AGAP3		FBXL7	FOXG1	LOC115495363		CROCC		AGO3		LOC115494713	LOC116808561	IL18BP	LGI1	LOC105758863	LOC116807809	LOC100221946	BCCIP		LOC100218406	LOC116808563	LOC116807901	LOC105759009	LOC115496024	SH3YL1	CTNNA1		GAS1	LOC100220799	EXPH5	LOC115497123	LOC105758806	LOC115496978	LOC115494706	PLEKHA6	F5		LOC115495964	PLD4	LOC115494460	RPL3L
LRMDA	LOC100227822	AQP3	LOC105758980	LOC100220956	LOC101234202	LOC115496569	LOC115491098	AGBL5		FGL2	FOXO1	LOC115495368		CTXND1		AGRN		LOC115495302	LOC116808582	IL18RAP	LOC100190718	LOC105759289	LOC116807825	LOC100221952	BCOR		LOC100218703	LOC116808821	LOC116808242	LOC105759036	LOC115496668	SLC28A3	CUBN		GEMIN8	LOC100222956	F2RL3	LOC115497131	LOC105759051	LOC115497127	LOC115494732	POLG	FAM107A		LOC115495965	PLEK	LOC115494465	SRR
MARCHF8	LOC100227898	AQP5	LOC105758998	LOC100221337	LOC105758557	LOC115498245	LOC115491222	AGGF1		FHAD1	GAN	LOC115495370		CUL2		AGRP		LOC115495533	LOC116808586	IL1RL1	LOC100218870	LOC115493001	LOC116807874	LOC100221970	BECN1		LOC100219721	LOC116808839	LOC116808691	LOC105759140	LOC115496754	SLC3A1	CXCL12		GNAL	LOC100224263	FAM124A	LOC115497150	LOC105759661	LOC115497152	LOC115494733	POLR2A	FAM172A		LOC115495967	PTAFR	LOC115494472	STAB2
METTL21C	LOC100230949	ARAP3	LOC105759005	LOC100222284	LOC105758561	LOC116806619	LOC115491517	AGMAT		FHL1	GAS7	LOC115495372		CUX2		AGTRAP		LOC115495951	LOC116808727	IL21R	LOC100219500	LOC115493571	LOC116807880	LOC100221985	BEND5		LOC100220601	LOC116808843	LRP12	LOC115491060	LOC115497021	SMAP1	CXCR5		GNB1	LOC100228479	FAM155A	LOC115498190	LOC105760826	LOC115497248	LOC115494741	POMP	FANCB		LOC115495969	PTPN6	LOC115494478	TEKT1
MFSD13A	LOC101232962	ARHGAP15	LOC105759741	LOC100223347	LOC105758573	LOC116806964	LOC115491835	AGXT		FILIP1	GEMIN2	LOC115495379		CZH9orf85		AHCTF1		LOC115496091	LOC116808844	IL2RG	LOC100220715	LOC115493854	LOC116807900	LOC100222639	BIRC5		LOC100222320	LOC116808846	MAK	LOC115491156	LOC115497341	SNX3	CYS1		GNB5	LOC100232233	FHL2	LOC116806613	LOC105760829	LOC115497417	LOC115496648	PRPF8	FBN1		LOC115495972	RUNX1	LOC115494488	TMPRSS7
MIR153-1	LOC105759349	ARHGAP22	LOC115491108	LOC100224698	LOC105758589	LOC116807829	LOC115492399	AHSA1		FLNB	GINS4	LOC115495381		DDX27		AHCYL1		LOC115496129	LOC116809021	IL7R	LOC100225043	LOC115493926	LOC116807905	LOC100222897	BLOC1S4		LOC100223548	LOC116808850	MCUR1	LOC115492520	LOC115497554	SOD2	DCN		GOLPH3	LOC105758644	FOXJ2	LOC116807646	LOC115490574	LOC115498074	LOC115496851	PRRC2C	FBXL22		LOC115495979	SASH3	LOC115494490	TOPBP1
MRPL43	LOC115491023	ARHGAP26	LOC115492903	LOC100225641	LOC115490562	LOC116807841	LOC115493344	AIFM1		FLT3	GNAO1	LOC115495383		DEGS1		AK2		LOC115496283	LOC116809116	INHA	LOC100226820	LOC115493951	LOC116807942	LOC100223567	BUB3		LOC100229245	LONP2	METTL15	LOC115493101	LOC115497824	TAAR1	DDR2		GPBP1	LOC105759510	FOXM1	LOC116807950	LOC115490655	LOC115498193	LOC115496889	PTPA	FCHO2		LOC115495990	SPI1	LOC115494493	VWDE
OC90	LOC115491067	ARHGAP36	LOC115493629	LOC100229701	LOC115490609	LOC116807857	LOC115493402	AIFM2		FNDC3B	GNPAT	LOC115495385		DGAT2		AKAP11		LOC115496404	LOC116809176	IRF1	LOC101233749	LOC115493987	LOC116808453	LOC100226769	BUD31		LOC100229295	LPCAT2	MRPS28	LOC115493107	LOC116807453	TAF1A	DDX25		GPR146	LOC115491106	FSTL1	LOC116808900	LOC115490934	LOC115498200	LOC115497523	PURG	FES		LOC115495993	STAC3	LOC115494499
OGDHL	LOC115492108	ARHGDIB	LOC115493642	LOC100229925	LOC115490662	LOC116807867	LOC115493414	AIP		FOXJ1	GOLGA4	LOC115495395		DLX1		AKAP6		LOC115496464	LOC116809313	IRF4	LOC105758620	LOC115494091	LOC116809181	LOC100226788	BZW2		LOC100230182	MBD3	NIPAL2	LOC115493557	LOC116807788	TCTE1	DLL1		GPR158	LOC115491935	GABRA5	LOC116808902	LOC115490957	LOC115498236	LOC115497572	RASL12	FGD2		LOC115496003	SULT1C4	LOC115494502
OPN4	LOC115492408	ARHGEF16	LOC115493643	LOC100230972	LOC115490696	LOC116807886	LOC115493427	AK1		FREM2	GPX1	LOC115495396		DNAJB14		AKAP9		LOC115496578	MEPE	IRF7	LOC105758771	LOC115494904	LRRC6	LOC100226896	C15H12orf49		LOC100232228	MBTPS1	NUDCD1	LOC115493641	LOC116808024	TNFSF15	DMRTB1		GPR88	LOC115492023	GAS6	LOC116808903	LOC115490970	LOC115498367	LOC116807008	RBBP6	FNBP1L		LOC115496007	THEMIS	LOC115494503
PIK3AP1	LOC115493432	ARID3A	LOC115493645	LOC100232098	LOC115490906	LOC116807895	LOC115493431	AK6		FRMPD2	GSK3B	LOC115495399		DNAJB6		AKR1A1		LOC115496660	MNX1	ITK	LOC105759932	LOC115495146	MCM4	LOC100229594	C18H17orf75		LOC101233650	MEAK7	P3H3	LOC115493702	LOC116808029	TP53I3	DNAH12		GRAMD1B	LOC115493847	GDPD5	LOC116808917	LOC115490975	LOC116806615	LOC116807118	RHOA	FRMPD1		LOC115496009	TLR2	LOC115494609
PLAC9	LOC115493475	ARL4C	LOC115493655	LOC100232385	LOC115490928	LOC116807899	LOC115493510	AKAP13		FZD6	GUCY1A2	LOC115495404		DNAJC3		AKR7A2		LOC115496722	MREG	JAML	LOC105760702	LOC115497263	MDGA1	LOC100229624	C1D		LOC101233722	MPHOSPH6	POU1F1	LOC115494013	LOC116808038	TRAPPC3L	DOCK5		GRIK2	LOC115495589	GJA3	LOC116808925	LOC115490988	LOC116806675	LOC116808016	RPL22L1	GALNT7		LOC115496017	TREM2	LOC115494619
PLAU	LOC115493650	ARL9	LOC115493660	LOC105758604	LOC115490983	LOC116808166	LOC115493537	AKAP17A		GAS2L2	HDAC4	LOC115495406		DNM1L		AKT3		LOC115496821	NKX2-4	JCHAIN	LOC115490694	LOC116807152	MRS2	LOC100229641	C21H1orf174		LOC105759233	MTHFSD	PPP1R42	LOC115494399	LOC116808058	TRNAS-GCU_3	DPYSL4		GRIP2	LOC115497270	GLRA2	LOC116808928	LOC115490991	LOC116806704	LOC116808031	RPN2	GIPC3		LOC115496018	UNC93B1	LOC115494621
POLL	LOC115494251	ARMC10	LOC115493664	LOC105759311	LOC115490996	MARCHF11	LOC115493545	AKAP5		GCK	HDHD2	LOC115495407		DOK1		ALDH1A2		LOC115496998	PCBP3	KLRG1	LOC115490735	LOC116807807	MTBP	LOC100230025	C25H1orf43		LOC115494806	NAT1	PRR15	LOC115494618	LOC116808065	UFL1	DR1		GRK4	LOC115497651	GNB3	LOC116808940	LOC115491012	LOC116807038	LOC116808104	SARDH	GLIS3		LOC115496020	VSIR	LOC115494686
POLR3GL	LOC115494459	ARMC3	LOC115493679	LOC115490949	LOC115491091	MCMDC2	LOC115493778	AKT1		GCNT1	HNRNPA2B1	LOC115495423		DUSP22		ALG6		LOC115497019	PRR5	LAG3	LOC115491071	LOC116807811	MTCL1	LOC100232496	C2CD3		LOC115494817	OGFOD1	RECK	LOC115494719	LOC116808069	WDR27	DSC1		GTF2F2	LOC115498478	GPC5	LOC116808947	LOC115491014	LOC116807092	LOC116808135	SBDS	GOLM2		LOC115496022		LOC115494704
PPIF	LOC115494696	ARMC4	LOC115493683	LOC115491090	LOC115491132	MED10	LOC115493921	ALAD		GDF6	HNRNPD	LOC115495431		EAF2		ALPK3		LOC115497109	RAB19	LCK	LOC115491595	LOC116807842	MTRR	LOC101233080	C4AHXorf56		LOC115494818	ORC6	RHPN1	LOC115494975	LOC116808073	ZC3H12D	DSE		HDAC9	LOC116808639	GPC6	LOC116808948	LOC115491033	LOC116807211	LOC116808136	SEC11A	GPR75		LOC115496028		LOC115494723
PPP1R3C	LOC115494947	ARMC8	LOC115493685	LOC115491184	LOC115491199	MEP1B	LOC115494511	ALAS1		GET4	HNRNPK	LOC115495432		ECSCR		ALPL		LOC115497174	RBKS	LCP2	LOC115492448	LOC116807869	NDUFV2	LOC101234101	C6H10orf88		LOC115494822	PABPN1L	RIOX2	LOC115495228	LOC116808079		DSG2		HIPK1	LOC116808851	GPR143	LOC116809084	LOC115491036	LOC116807227	LOC116808137	SELENOM	GREB1L		LOC115496031		LOC115494724
PRXL2A	LOC115495398	ARMH4	LOC115493688	LOC115491649	LOC115491386	MRPL13	LOC115495210	ALDH2		GFRA3	HNRNPU	LOC115495434		EIF4E		ALS2CL		LOC115497281	S100A14	LIME1	LOC115492619	LOC116808050	NELL1	LOC101234163	C8H1orf52		LOC115494877	PKD1L2	RNF149	LOC115495748	LOC116808163		DSP		HIVEP2	LOC116808951	GPR15	MCM8	LOC115491047	LOC116807273	LOC116808139	SIN3A	GTF3C5		LOC115496070		LOC115494729
PTCD3	LOC115495550	ARR3	LOC115493693	LOC115493031	LOC115491658	MYOM1	LOC115496444	ALDH4A1		GJB3	HSPA8	LOC115495437		EIF4EBP3		ALYREF		LOC115497597	SH2D2A	LOC100217480	LOC115493013	LOC116808780	NSG1	LOC105758513	CACYBP		LOC115494908	PNP	RNF182	LOC115496281	LOC116808668		DUSP28		HMGXB3	LOC116809193	GPR183	MEIKIN	LOC115491056	LOC116807594	MATN3	SLC15A1	GTF3C6		LOC115496073		LOC115494734
PYROXD2	LOC115496452	ARSB	LOC115493706	LOC115493519	LOC115491666	NDC80	LOC115496657	ALDH6A1		GMNC	IGF2BP3	LOC115495446		ELAC1		AMACR		LOC115497624	SNORC	LOC100217789	LOC115493134	LOC116809006	NSMCE2	LOC105759312	CARD19		LOC115494914	POLR2C	RPA3	LOC115496815	MGME1		EBF3		HTR2C	LOC116809306	GPR89B	MFAP3	LOC115491069	LOC116807810	MCM9	SLC35A5	HCFC2		LOC115497144		LOC115494739
RAB11FIP2	LOC115496567	ASB1	LOC115493713	LOC115493766	LOC115492167	NECAB1	LOC115496659	ALDH9A1		GNAT2	IL31RA	LOC115495451		ELOVL4		AMBRA1		LOC115498218	TECRL	LOC100218402	LOC115493164	LOC116809207	NTAQ1	LOC105759314	CASC1		LOC115494917	POP4	RSPO2	LOC115497184	MIR2131		ECM2		IGFBP2	LRFN5	GRAMD1C	MIR218-2	LOC115491072	LOC116807896	MCPH1	SON	HECTD2		LOC115497334		LOC115496420
RBP3	LOC115497206	ASB2	LOC115493715	LOC115493804	LOC115493340	NKX3-2	LOC115496662	ALDOC		GPRC5B	INSIG2	LOC115495460		ENG		AMDHD1		LOC115498407	THYN1	LOC100218628	LOC115493170	LOC116809289	OTUD6B	LOC105759318	CBR4		LOC115494918	PPP1R3E	RUBCNL	LOC115497698	MKKS		EDNRA		IL16	MAP1S	GSTK1	MRNIP	LOC115491088	LOC116807955	MRAP2	SPEN	HEMK1		LOC115497359		LOC115496637
RGR	LOC115497666	ASIP	LOC115493759	LOC115494113	LOC115493347	OPRK1	LOC115497326	ALG2		GUCY2F	INTS4	LOC115495479		ENPP4		AMMECR1L		LOC116806636	TMEM184C	LOC100218875	LOC115494036	LYSMD2	PAG1	LOC105759334	CCNJ		LOC115494920	PSKH1	SLC35B3	LOC115497905	MMUT		EFEMP1		IL34	MED28	GTF2E1	MRPL39	LOC115491101	LOC116808256	MRPS18A	SPTAN1	HIVEP1		LOC115497648		LOC115497075
RRP12	LOC115498215	ASPH	LOC115493835	LOC115494286	LOC115493350	PIAS4	LOC115497570	ALG3		HHIP	JPH3	LOC115495492		ERN2		AMOT		LOC116806743	TRIM47	LOC100220412	LOC115495000	MAT2B	PKIA	LOC105759570	CCT4		LOC115494924	RBL2	SLC35D1	LOC115498026	MSH5		EHD3		IQSEC3	METTL8	GYG2	NME5	LOC115491125	LOC116808510	MSGN1	STMN2	HNRNPH1		LOC115497806		LOC115498459
SAMD8	LOC115498273	ASTN1	LOC115493935	LOC115494504	LOC115493361	PPDPFL	LOC115497642	ALG9		HSPA2	KANK3	LOC115495493		EWSR1		AMPD1		LOC116806843	TRPM8	LOC100220534	LOC115495559	MLH1	PPP3R1	LOC115490691	CCT8		LOC115494926	RFWD3	SLC7A13	LOC116806842	MTARC2		EIF5A2		JUN	MIB2	HGD	NUDCD2	LOC115491126	LOC116808790	MYCT1	STXBP5L	HOOK1		LOC115497935		LOC116808022
SFR1	LOC115498461	ASXL3	LOC115494099	LOC115494522	LOC115493367	PSMG2	LOC115497712	ALKBH3		HSPB8	KAT6B	LOC115495498		EXOC5		ANAPC1		LOC116806851	TSEN54	LOC100220712	LOC115497243	MPC1	PPWD1	LOC115490753	CDAN1		LOC115494927	RYK	SRD5A1	LOC116807003	MTIF2		EPHX1		KBTBD2	MTF1	HHLA1	PCBD2	LOC115491134	LOC116808824	NOX3	THG1L	ICMT		LOC115498508		LOC116808023
SFRP5	LOC116806941	ATL2	LOC115494803	LOC115494833	LOC115493368	PTK2	LOC115498049	ALKBH7		HTR1E	KCNC2	LOC115495653		FAM102A		ANAPC13		LOC116807657	TSPAN12	LOC100220728	LOC115498033	MRPL20	PROM1	LOC115492365	CDK2AP1		LOC115494930	SHCBP1	STAU2	LOC116807115	OVOL1		ESAM		KBTBD3	MTMR3	HSD3B1	PDLIM4	LOC115491138	LOC116808835	OSTM1	TIAM1	IGF2BP2		LOC115498542		LOC116808028
SFTPA	LOC116807478	ATP10A	LOC115496269	LOC115494906	LOC115493381	RAB42	LOC116806730	AMBP		HTR5A	KCNMA1	LOC115495659		FAM169A		ANAPC15		LOC116808075	TTLL12	LOC100221146	LOC115498248	MRPS36	PTDSS1	LOC115493420	CENPE		LOC115494937	SLC12A3	SUSD5	LOC116807170	PDSS2		ESM1		KCNK1	NAA50	IL18R1	PHYKPL	LOC115491154	LOC116809174	PCMT1	TMEM59	INTS6		LOC116807082		LOC116808032
SFXN2	LOC116807789	ATP11B	LOC115496389	LOC115494983	LOC115493385	RAD54B	LOC116806850	AMER2		ICA1	KDELR3	LOC115495679		FAM199X		ANAPC5		LOC116808156	VWCE	LOC100221316	LOC116807001	MTAP	RAD21	LOC115493760	CEP112		LOC115494944	SLC12A4	SYCP2L	LOC116808237	PNLDC1		EVA1B		KCNK12	NCKIPSD	IL1R1	POU4F3	LOC115491161	LOC116809248	PIGM	TOP2A	INTU		LOC116807126		LOC116808077
SHISA9	LOC116807806	ATP13A1	LOC116807664	LOC115495214	LOC115493389	RBFA	LOC116806895	AMER3		IGSF6	KDM7A	LOC115495680		FAM222B		ANK2		LOC116808174		LOC100221351	LOC116807457	MTMR8	RALBP1	LOC115494549	CEP164		LOC115494955	SLC38A8	TAMM41	LOC116808428	POLR3F		EYA4		KCNS2	NFE2L2	ING1	PTTG1	LOC115491171	MIR142	PPP1R21	TPR	IPO13		LOC116807281		LOC116808078
SHLD2	LOC116807888	ATP2B4	LOC116807738	LOC115495502	LOC115493405	RBM24	LOC116807004	AMH		IMPG1	KMT2E	LOC115495682		FANCM		ANK3		LOC116808179		LOC100222416	LOC116807943	MTRES1	RHBG	LOC115495016	CETN2		LOC115494957	SLC7A6	TCF24	LOC116808829	PRIM2		FABP5		KDM8	NFIA	ITFG2	RAD50	LOC115491172	MYH7B	PRRG4	TRARG1	IQGAP1		LOC116807397		LOC116808087
SMIM7	LOC116808643	ATP4B	LOC116807785	LOC115496707	LOC115493411	RGS20	LOC116807405	AMIGO1		IQCA1	LAMP2	LOC115495685		FBF1		ANKFY1		LOC116808438		LOC100222691	LOC116809111	MYCBP	RIPK2	LOC115495308	CFAP61		LOC115494964	SLC7A6OS	TGS1	LOC116808895	PRKN		FAT2		KLHL13	NIPAL3	KCNRG	RARS1	LOC115491173	NEK2	RAB32	TSC22D2	ITGA2		LOC116807673		LOC116808105
SORCS1	LOC116808914	ATP5MPL	LOC116807790	LOC115496872	LOC115493417	RIDA	LOC116807677	AMPD2		IQCG	LMNB1	LOC115495691		FBXO3		ANKHD1		LOC116808526		LOC100223160	LRFN1	MZT1	SDR16C5	LOC115495312	CFAP69		LOC115494985	SNX20	THOC1	LRRCC1	PSMB1		FBH1		KMT5A	NLGN3	KLF12	RNF14	LOC115491177	NME8	RARS2	UBR4	ITGB6		LOC116807696		LOC116808106
TMEM254	LOC116809048	B3GALT2	LOC116807795	LOC115497551	LOC115493430	RRM2B	LOC116807697	AMPH		ITGA4	LOC100218075	LOC115495697		FBXO5		ANKMY2		LOC116808682		LOC100223311	LSM8	NAE1	SEH1L	LOC115495314	CFDP1		LOC115494999	TAT	TRNAL-CAG_2	LRRN2	SERAC1		FBLN2		LIMK2	NSG2	LAD1	SLC22A4	LOC115491178	ODF1	RD3	WDR6	KBTBD13		LOC116807836		LOC116808109
TNFRSF17	LOC116809112	B3GLCT	LOC116807800	LOC115497799	LOC115493438	RSAD1	LOC116807729	AMT		JAG1	LOC100218930	LOC115496046		FBXO9		ANKRD16		LOC116808863		LOC100223333	MAF	NAP1L4	SPAG1	LOC115495336	CGRRF1		LOC115495017	THAP11	TSNARE1	LRRTM1	SERINC1		FBLN5		LOC100218462	OPCML	LHFPL6	SLC25A48	LOC115491230	PGAP4	RSPH9	WNK2	KCNH1		LOC116808414		LOC116808114
TRUB1	LOC116809143	B4GALT4	LOC116807816	LOC115497819	LOC115493440	RTTN	LOC116807730	ANAPC11		KCNG4	LOC100220115	LOC115496405		FGFR3		ANKRD31		LRCH2		LOC100224927	MAP11	NDUFAF7	SPG7	LOC115495337	CHMP2B		LOC115495022	TJP3	VPS41	MAN1C1	SLC25A27		FBXL3		LOC100220079	OSBP2	LOC100217615	SLC26A2	LOC115491231	PGC	RWDD2A	XRN2	KCNJ3		LOC116808595		LOC116808147
TWNK	LOC116809197	BACE1	LOC116807833	LOC115497908	LOC115493443	SCGN	LOC116807743	ANAPC16		KCNJ16	LOC100221324	LOC115496426		FGFRL1		ANKRD33B		MAFA		LOC100225149	MAPT	NDUFB1	SPIDR	LOC115495360	CIAPIN1		LOC115495051	TMEM170A	VSX2	MAP2K1	SLX4IP		FBXO39		LOC100221272	OSGIN2	LOC100217918	SLC34A1	LOC115491242	PLCZ1	SF3B5	YBX1	KHDC4		LOC116808600		LOC116808169
UBE2D1	LOC116809199	BAIAP2	LOC116807843	LOC115497993	LOC115493470	SLA	LOC116807746	ANAPC2		KCNK5	LOC100221996	LOC115496437		FNBP4		ANKRD34C		MAIP1		LOC100225363	MAST3	NINJ1	STKLD1	LOC115495402	CISD2		LOC115497586	TRADD	ZC3H3	MAPK8IP1	SNX8		FGFR4		LOC100221705	PAK6	LOC100219548	SOWAHA	LOC115491248	POU4F1	SLC17A5	ZC3H11A	KIAA0319L		LOC116808604		LOC116808781
WDFY4	LOC116809308	BARD1	LOC116807851	LOC115498303	LOC115493472	SLBP	LOC116807748	ANGPTL4		KCNQ5	LOC100223408	LOC115497018		FSCN2		ANKRD44		MED11		LOC100225830	MAT2A	NPM1	TAF2	LOC115495428	CKS2		LOC115497930	VPS35	ZFAND1	MMP15	SPATA17		FHL5		LOC100223925	PCYT1B	LOC100219809	SOX2	LOC115491251	PRRT1B	SLC18B1	ZFHX3	KIAA0753		LOC116808608		LOC116808801
ZCCHC24	LPAR1	BARHL1	LOC116809250	LOC115498419	LOC115493513	SLC16A5	LOC116807752	ANKLE2		KCNS3	LOC100225436	LOC115497669		GDPD1		ANKRD52		MITF		LOC100226157	METTL6	NUTF2	TAFA1	LOC115495475	CLASP1		LOC115498474	WDR59	ZHX1	MMS19	SRBD1		FHOD1		LOC100224567	PDE4DIP	LOC100221786	SPDL1	LOC115491252	PRSS55	SLC22A16	ZNF638	KTI12		LOC116808610		LRP11
ZNF488	LRP2	BCAS2	LRRC72	LOC116807180	LOC115493514	SLC25A38	LOC116808048	ANKRD10		KIF24	LOC100225453	LOC115497679		GGNBP2		ANO4		MORF4L1		LOC100226241	MIDN	OCIAD1	TDP2	LOC115495495	CLDN25		LOC115498544	ZDHHC7	ZNF804B	MPHOSPH9	TENT5A		FLCN		LOC100224754	PIBF1	LOC100223080	STARD10	LOC115491266	RFX8	SMPDL3A		LAMA4		LOC116808612		MALL
	LSM10	BCL11A	MACC1	LOC116808092	LOC115493530	SMIM13	LOC116808141	ANKRD13B		KIF9	LOC100227175	LOC115497802		GJA10		ANP32A		MRPL17		LOC100226434	MTFMT	OLA1	TERF1	LOC115495514	CLTA		LOC116807949	ZNF423		MTSS2	TMEM119		FLNC		LOC100228113	PITPNM1	LOC100223512	STING1	LOC115491272	SLC7A9	SPRTN		LAMA5		LOC116808629		MAMDC2
	LTBP1	BDH1	MC4R	LOC116808255	LOC115493745	SNTB1	LOC116808416	ANKRD13D		KLF3	LOC100227831	LOC115497862		GLIS2		ANPEP		MRPL40		LOC100226582	MYO18A	P2RY14	TM4SF1	LOC115495515	CLYBL		LOC116808215			NCF1	TMEM30A		FNDC1		LOC100229858	PLA2G10	LOC100224083	STK32A	LOC115491281	SPATA18	STARD8		LAMP3		LOC116808631		MAP1LC3C
	LYPD6	BDH2	MIOS	LOC116808601	LOC115493749	SPATA48	LOC116808599	ANKRD24		KLF4	LOC100229022	LOC115497915		GLRB		AP1AR		MTA1		LOC100226894	NACAD	PA2G4	TMEM186	LOC115495517	CMC2		LOC116808218			NKX2-8	TRDN		FOXC1		LOC101234143	PMM1	LOC100224972	TXNDC15	LOC115491283	STOM	STXBP5		LEP		LOC116808778		MMS22L
	LYPD6B	BDNF	MIR2972	LOC116808676	LOC115494074	STXBP4	LOC116808711	ANKRD26		LOC100218558	LOC100229500	LOC115498325		GMFB		AP1G1		NACA		LOC100226902	NEUROD2	PCNP	TMEM65	LOC115495519	CNIH4		LOC116808228			NPDC1	TRUB2		FOXC2		LOC105759325	PPIP5K1	LOC100225635	UPK1B	LOC115491489	SYCP1	SUPT3H		LHPP		LOC116808882		MOXD1
	MAS1	BEND6	MPP6	LOC116808710	LOC115495871	SUGCT	LOC116808822	ANKRD27		LOC100218634	LOC100231964	LOC116806610		GOLT1B		AP2A2		NCOA2		LOC100227201	NFASC	PDAP1	TMEM67	LOC115495520	CNOT11		LOC116808234			OPN3	TSNAX		FOXD1		LOC115494292	PPL	LOC100225918	WDPCP	LOC115491524	TCFL5	SWI5		LOC100189939		LRRC45		MSH2
	MBP	BFSP1	MRPL3	LRRC18	LOC115495896	SYBU	LOC116808869	ANKRD28		LOC100219992	LOC101232972	LOC116807385		GOPC		AP2B1		NDUFAF4		LOC100227341	NFE2L1	PDCD10	TMEM71	LOC115495523	CNTRL		LOC116808236			P2RX1	TTC32		FOXD2		LOC115495387	PPP6R2	LOC100225953	ZCCHC10	LOC115491633	TEKT2	SYCE2		LOC100217831		MCM6		MSH6
	MFSD8	BHLHE41	MSRB2	LRTM2	LOC115496312	TBC1D7	LOC116809019	ANKRD33		LOC100220010	LOC115490997	LOC116807507		GPAM		AP3D1		NDUFB7		LOC100227529	NHLH1	PDGFRB	TPD52	LOC115495530	COL14A1		LOC116808245			PCSK5	TUBE1		FOXL1		LOC115496947	PRKCB	LOC100226358	ZSWIM1	LOC115492389	TEKT3	TDRD6		LOC100218173		METTL21A		MTFR2
	MTUS1	BIN3	MYLK4	LRWD1	LOC115498364	TG	LTA4H	ANKRD34A		LOC100221672	LOC115491002	LOC116807591		GPM6A		AP3M1		NR2C2AP		LOC100228705	NIBAN2	PDPR	TRIQK	LOC115495531	COMMD2		LOC116808257			PDSS1	WDR35		FREM1		LOC115496992	PSMD14	LOC100226560		LOC115492501	TEX36	TRAF3IP2		LOC100218848		METTL5		MTRF1L
	MYRF	BMP6	NEK10	MDH1B	LOC115498554	TMEFF1	MEIG1	ANKRD34B		LOC100222446	LOC115491075	LOC116807892		GPM6B		AP3S1		NUBP1		LOC100229375	NPLOC4	PKD1	TTPA	LOC115495532	COMMD7		LOC116808439			PHF24			FRMD1		LOC115497582	RAB11FIP3	LOC100226962		LOC115492510	WDR64	TSTD3		LOC100220017		MGAT5		MTX3
	NDRG1	BMPER	NEK11	MET	LOC116806689	TMEM70	METTL25	ANKRD39		LOC100223131	LOC115491084	LOC116807941		GPR155		AP5M1		OTC		LOC100229421	NR4A1	PLCXD1	YES1	LOC115495534	COPS4		LOC116808859			PIWIL2			FZD2		LOC115498332	RALGDS	LOC100227231		LOC115492572	ZMYND12	TTC27		LOC100220148		MPP4		NMUR1
	NEB	BNC1	NKIRAS1	MOB2	LOC116806758	TNFRSF11B	MIR9-2	ANKRD40		LOC100223132	LOC115492497	LOC116808094		GRAMD4		APBA1		PAGR1		LOC100229516	NUMA1	PPP2CA	ZBBX	LOC115495541	COPS8		LOC116808864			PLA2G12B			FZD7		LOC116806709	RAMP3	LOC100227480		LOC115493412	ZPBP2	TULP1		LOC100220427		MTX2		NOL10
	NFATC2	BRINP2	NOD1	MOB3C	LOC116807087	TRAPPC9	MORN3	ANKRD50		LOC100223232	LOC115493933	LOC116808460		GULP1		APBA2		PDE4B		LOC100229789	NUMB	PPP2R5D	ZBTB14	LOC115495542	COPS9		LRP2BP			PLCXD3			GATM		LOC116806885	RASGRF1	LOC100228523		LOC115493639		UBE3D		LOC100220752		NEMP2		NPHP1
	NIBAN1	BROX	NPHP3	MOSPD1	LOC116807268	TWISTNB	NDUFA12	ANKRD9		LOC100223778	LOC115493972	LOC116808524		HABP2		APBA3		PDPK1		LOC100229802	NUP98	PSIP1		LOC115495544	COX6C		LRPAP1			PLIN2			GCNT3		LOC116807693	RBM48	LOC100229177		LOC115493758				LOC100221646		NEUROD1		NVL
	NINJ2	BST1	NPSR1	MRPS22	LOC116807269	VAPA	NEDD1	ANO5		LOC100224101	LOC115494496	LOC116808804		HACE1		APBB2		PEPD		LOC100229988	NXT2	PSMA2		LOC115495546	COX7A2		LYAR			PLPBP			GDF5		LOC116808021	RDH10	LOC100229427		LOC115494082				LOC100224236		NIF3L1		OGFRL1
	NKX6-2	BTBD11	NRSN1	MTA3	LOC116807684	VDAC3	NSMCE1	ANO6		LOC100224489	LOC115495126	LOC116808805		HDAC11		APC		PEX12		LOC100230452	OCRL	PSMA6		LOC115495549	CSF1		MGARP			POLR3E			GFOD2		LRP1B	RHBDD1	LOC100230753		LOC115494584				LOC100224950		NR1H4		OTOP2
	NOCT	BTK	OLAH	MTMR4	LOC116807714	VPS13B	ORC5	ANTKMT		LOC100224894	LOC115497247	LOC116808950		HDGFL3		APCDD1L		PLPPR1		LOC100230866	PALM	PSME3IP1		LOC115495557	CSF2RB		MRPL1			PROX1			GJA1		LRRK1	RMC1	LOC100231134		LOC115494625				LOC100225832		ORC4		PEX7
	NRROS	BVES	PCSK7	NDUFAF2	LOC116807721	VSTM2A	PAH	ANTXRL		LOC100225532	LOC115497257	LOC116809275		HERPUD2		APOC3		PPAT		LOC100231469	PARP11	PTCD2		LOC115495565	CSMD3		MTTP			QKI			GJB2		LSM11	RMND1	LOC100231773		LOC115494630				LOC100227087		ORMDL1		PM20D2
	NT5C3A	C14H16orf71	PFKP	NHLRC1	LOC116807723	WRNIP1	PFN2	ANXA4		LOC100225730	LOC115497881	LRIT2		HIBCH		APOF		PPP1R12A		LOC100231510	PATL1	PTMA		LOC115495575	CSNK1G3		NAAA			RBL1			GPC4		LSM14A	RNASEH2B	LOC100232370		LOC115495137				LOC100227840		OSGEPL1		POLR1B
	NTRK3	C1AH12orf75	PITPNB	NKRF	LOC116807733	YAE1	PHETA2	AP1S1		LOC100227271	LOC116807022	LRRC55		HIC1		APP		PPP1R3B		LOC100231542	PDE4A	RAB18		LOC115495580	CTNNBL1		NCAPG			RBMS3			GPR19		LSM3	RPAP2	LOC101233542		LOC115495254				LOC100228682		PMEL		POLR1C
	NXN	C1H11orf87	PITRM1	NMUR2	LOC116807739	ZBTB10	PIGN	AP1S3		LOC100227584	LOC116807225	LRRC56		HIF1AN		APPBP2		PPTC7		LOC100232117	PDLIM3	RAB1A		LOC115495581	CZH18orf32		NFKB1			RGS14			GPX8		LUZP1	RPTOR	LOC101233700		LOC115495376				LOC100228799		PMS1		PRSS35
	OTUD7B	C1H3orf85	PP2D1	NOL4	LOC116807747	ZFAT	POLR3B	AP2S1		LOC100229165	LOC116807247	LSP1		HIP1R		APPL1		PRDX4		LOC100232284	PDZD7	RAB7A		LOC115495584	CZH5orf63		NOP14			RNF123			GSN		MAL2	SCAP	LOC101234096		LOC115495765				LOC100228927		PPIL3		PSAT1
	PACS2	C1QL1	PXDC1	NOS1	LOC116808227	ZFPM2	PRC1	AP3B1		LOC100230051	LOC116807661	LTO1		HP1BP3		AQR		PREP		LOC100232617	PHF12	RAD1		LOC115495587	DAP3		NPY1R			ROCK1			GUCA1B		MAP3K13	SELENON	LOC105758648		LOC115496336				LOC100229929		PPP1R1C		PUS10
	PIK3CB	C1QL3	RAB11FIP5	NRP1	LOC116808441	ZNF706	PRTFDC1	AP3B2		LOC100232083	LOC116807687	LUZP2		HSBP1		AR		PSMG4		LOC101232842	PHF8	RAE1		LOC115495591	DARS1		NPY2R			ROGDI			GUCY1A1		MAP3K7	SEMA4G	LOC105758664		LOC115496477				LOC100230724		QRFP		QPCT
	PIRT	C25H1orf189	SCRN1	NSMCE4A	LOC116808529		RASSF9	AP3S2		LOC100232344	LOC116807688	M1AP		HSPA9		ARAP1		PTS		LOC101232986	PLEKHM1	RAF1		LOC115495595	DBT		NPY5R			RTEL1			GYPC		MAP4K5	SERTAD4	LOC105758692		LOC115496552				LOC100231121		RALB		RAD51AP2
	PISD	C2CD4C	SKAP2	OCA2	LOC116808964		RSBN1L	AP4E1		LOC100232372	LOC116807689	MDM4		IDH3A		ARC		RP1L1		LOC101233009	POLRMT	RAP2C		LOC115495596	DCAF5		NUDT9			RTN4RL2			HEXA		MAP7D2	SETD2	LOC105759411		LOC115496740				LOC100231625		RELCH		RALGAPA2
	PLP1	C2H7orf31	SLC22A23	PALM2AKAP2	LSMEM1		SMYD3	AP5Z1		LOC105758876	LOC116807700	MSL2		IGHMBP2		ARFGAP1		RPF2		LOC101233140	PPP1R15B	RECQL5		LOC115495606	DCSTAMP		OCIAD2			SARM1			HGF		MAPK6	SH2B2	LOC105760446		LOC115497012				LOC100231733		RFTN2		RBM34
	PPP1R16B	C5H11orf24	SLC35F1	PAPOLG	MAPK12		SNU13	APBB1		LOC105759186	LOC116807928	MUC2		INPP5A		ARFGEF1		RPL10A		LOC101233303	PPRC1	RER1		LOC115495610	DCTN3		PACRGL			SART3			HHIPL1		MAPK9	SH3BP5	LOC115490748		LOC115497252				LOC100231934		RNF25		RHOQ
	PRAG1	C5H15orf62	SLC39A12	PCDH17	MCAT		SRPK2	APBB3		LOC105760877	LOC116808233	NAT10		IPO11		ARFGEF2		RPL11		LOC101233381	PRELID3A	RGS7BP		LOC115495626	DCTN5		PDGFRL			SCML4			HORMAD2		MARCKSL1	SIAH1	LOC115491152		LOC115497431				LOC100231949		SGO2		RNASEH1
	PROCA1	C7H2orf69	SNX10	PCNX4	MCM5		TBXAS1	APH1A		LOC115490990	LOC116809000	NLRP3		IRX2		ARG2		RPL13		LOC101233409	PTPN23	RHEB		LOC115495649	DDX17		PDLIM5			SCN3B			HS2ST1		MARK1	SLC25A12	LOC115492465		LOC115497618				LOC100232706		SLC25A13		RNF8
	PTPN3	C7H2orf88	SPAG6	PDE9A	MED21		TCTEX1D2	API5		LOC115493609	LOC116809311	NOC2L		ITM2C		ARHGAP1		RPL13A		LOC101233449	RAB12	RIOK1		LOC115495650	DDX28		PGM2			SEMA4A			HSPG2		MARK3	SLC25A42	LOC115493533		LOC115497900				LOC101232977		SLC39A14		RWDD1
	RAP1A	C9H3orf70	SRI	PGM5	METTL24		THAP5	APLF		LOC115493780	LRRC4	NRIP3		ITPRID2		ARHGAP21		RPL14		LOC101233451	RAI2	RP9		LOC115495886	DDX47		PI4K2B			SEPTIN12			IBSP		MCOLN3	SLC7A5	LOC115493776		LOC115497926				LOC101233224		SLC40A1		SDHAF4
	RASGRP3	CA4	ST8SIA6	PLXNA2	MFNG		TOM1	APOA1		LOC115494062	LSM14B	NUCB2		KBTBD8		ARHGAP35		RPL15		LOC101233514	RBMS2	RPAP3		LOC115495982	DDX58		PLA2G12A			SEZ6L			IFT172		MGAT4B	SLC9A5	LOC115493810		LOC116806640				LOC101233767		STK17B		SF3B6
	REEP3	CA8	STEAP1	PLXNA4	MIEF1		ZC3H7B	APOOL		LOC115494330	M6PR	NUP160		KIF7		ARHGAP39		RPL18A		LOC101233730	RIMBP2	RTF1		LOC115496121	DGKQ		PLK4			SH2D4A			IL22RA1		MYCL	SMAD7	LOC115493868		LOC116806742				LOC101234119		TFPI		SGK1
	RGMA	CABLES1	STEAP2	PLXNC1	MND1			APTX		LOC115494443	MAGI2	PEX26		KLHL40		ARHGEF10		RPL21		LOC101233739	RNF44	SAR1A		LOC115496433	DHX32		POLR1A			SIAH2			INTS12		MYO1B	SMARCA4	LOC115493915		LOC116806744				LOC105760188		TMEM177		SH3BGRL2
	RHBDF1	CABP7	STK17A	POLE	MYO1D			ARCN1		LOC115494972	MAP1A	PHLDA2		KLHL5		ARHGEF18		RPL22		LOC101233820	RPRD2	SH3GL3		LOC116807439	DMD		POMK			SLC22A31			ISLR		MYO5A	SMCR8	LOC115494034		LOC116806746				LOC105760853		TMEM237		SH3TC1
	RPRML	CACNA1H	TBP	PTGFRN	NAGA			ARF6		LOC115495115	MAP1B	PIK3R5		KLHL7		ARHGEF37		RPL23		LOC101233915	RWDD4	SKP1		LOC116808445	DNAH10		PPA2			SLC2A11			ISM2		NEBL	SNX27	LOC115494072		LOC116806764				LOC105760897		UBE2E3		SLC22A7
	S100B	CACNA1I	TFPI2	PWWP2B	NCF4			ARFGEF3		LOC115495489	MAP2K3	PKP3		LEO1		ARHGEF5		RPL23A		LOC101234056	S1PR1	SMIM15		LOC116808482	DNAJC25		PPM1K			SLC30A3			ISY1		NECAB2	SOX4	LOC115494101		LOC116806765				LOC115490688		VIL1		SLC35B2
	SCN4B	CACNA2D2	TGM4	RAB23	NEK8			ARFIP1		LOC115495811	MAP2K6	PLEKHG3		LETM1		ARHGEF7		RPL24		LOC101234199	SBF1	SNRNP200		LOC116808490	DOLPP1		RBM46			SLC35A3			ITGB1BP2		NETO1	SPEG	LOC115494152		LOC116806766				LOC115490813		WDR75		SMC6
	SCRG1	CACNA2D3	TMC2	RCSD1	NRCAM			ARFIP2		LOC115495961	MARCKS	POLD4		LHX3		ARHGEF9		RPL26L1		LOC105758892	SBK1	SNX24		LOC116808494	DPM1		RELL1			SLC35G1			ITIH2		NLK	SRD5A2	LOC115494384		LOC116806777				LOC115490956		WIPF1		SMIM26
	SCRT2	CACNG4	TMEM158	RET	NUP37			ARFRP1		LOC115495985	MATR3	POLR2L		LIF		ARIH1		RPL27		LOC105759033	SCAF4	SSB		LOC116808501	DTD1		RFC1			SLC38A7			JAK3		NPRL3	SRF	LOC115494624		LOC116806782				LOC115491015		ZRANB3		SMIM28
	SEPTIN8	CACNG5	TMEM42	RFX2	ORM2			ARHGAP12		LOC115496050	MBNL2	PRG2		LIN52		ARIH2		RPL27A		LOC105759190	SEZ6	STARD3NL		LOC116808519	DTHD1		RHOH			SMIM32			JAM3		NR3C1	SRP54	LOC115494715		LOC116806787				LOC115491078				SNX9
	SHPK	CADM1	TOPAZ1	RHBDL3	OVCH2			ARHGAP18		LOC115496078	MED13	PRMT3		LIN7C		ARL1		RPL3		LOC105759399	SIK3	SUGT1		LOC116808884	E2F1		RNF4			SQOR			JUP		ODC1	ST3GAL3	LOC115494880		LOC116806790				LOC115491224				SPATA22
	SIRT7	CALB1	TRIP13	RPP14	PHTF2			ARHGAP27		LOC115496127	MED26	PTH		LMBRD1		ARL3		RPL30		LOC105759491	SLC9A1	SULT4A1		LOC116809063	ECD		RRH			STK3			KCNJ8		OSBPL11	SV2A	LOC115494932		LOC116806797				LOC115491228				SPTBN1
	SLC16A1	CALD1	TUBB6	RUFY3	PHYH			ARHGAP31		LOC115496381	MEIS2	PTX4		LMBRD2		ARL6IP4		RPL31		LOC105759805	SMARCC1	SUMO2		MAP2K4	EHMT1		SARAF			STRIP1			KDR		OSBPL6	SYK	LOC115495013		LOC116806807				LOC115491290				SRP9
	SLC46A3	CALM2	TXNL4A	RUNX2	PIK3CG			ARHGAP44		LOC115496571	MERTK	RAD51		LMNA		ARL8A		RPL32		LOC105760310	SMARCC2	SYNPR		MAPKAPK3	EIF1		SCFD2			STX2			KIAA1522		OSBPL8	SYNGR3	LOC115495014		LOC116806815				LOC115491300				SYNJ2
	SLC6A9	CALN1	ULK4	SAP30	PLA2G6			ARHGDIA		LOC115496670	MFSD14A	RAD9A		LMOD1		ARL8B		RPL34		LOC105760648	SMG7	TBCA		MC3R	EIF2B3		SCLT1			TESK1			KIF21A		OXR1	SYVN1	LOC115495049		LOC116806821				LOC115492259				TATDN3
	SOX10	CAMK1G	UMAD1	SEC31B	POGLUT2			ARHGDIG		LOC115496804	MIDEAS	RAG1		LNPK		ARMC9		RPL35		LOC105760649	SMIM14	TEX261		MIA2	EIF2S1		SEPSECS			TGDS			KIT		P4HB	TBC1D22B	LOC115495091		LOC116806839				LOC115492421				TBCC
	SPECC1	CAMK2D	VEGFC	SEMA6D	POLR3H			ARHGEF10L		LOC115497117	MPHOSPH8	RHCG		LOC100219287		ARMH3		RPL35A		LOC115490588	SNCAIP	TFB2M		MIPOL1	EIF2S2		SGCB			TIMP2			KLHL10		PACSIN2	TBCD	LOC115495129		LOC116806845				LOC115493139				TBCE
	SRCIN1	CAMK2G	VPS50	SETD5	PPHLN1			ARHGEF11		LOC115497321	MYO1C	RHOD		LOC100220162		ARNT2		RPL36		LOC115490720	SNPH	TJAP1		MIR2985-2	EIF3E		SH3BP2			TMEM104			KLHL4		PAK1	TLCD3A	LOC115495305		LOC116806848				LOC115493349				TBXT
	SYT2	CAPN14	VWC2	SGSM1	PPP1R3A			ARHGEF17		LOC115497384	NACC2	RIC8A		LOC100220938		ARPC3		RPL36A		LOC115490727	SNX33	TM2D3		MOK	EIF3F		SHISA3			TMEM121			KNG1		PALLD	TLE3	LOC115495309		LOC116806959				LOC115493459				THBD
	TFEC	CAPN5	WDR60	SHISA6	PTN			ARHGEF2		LOC115497675	NCL	RMDN3		LOC100221697		ARSG		RPL37		LOC115490810	SP1	TMED2		MYBPC3	EIF3L		SMIM18			TMEM198			KREMEN1		PANK1	TMEM121B	LOC115495315		LOC116807012				LOC115493678				TRIM54
	TJP2	CARHSP1	ZNF516	SIN3B	PUS7			ARID1B		LOC115497794	NDP	RNH1		LOC100222277		ARSI		RPL4		LOC115490985	SP2	TMEM127		NFKBIA	EIF5		SMIM19			TMEM59L			KRT80		PAQR9	TMEM201	LOC115495316		LOC116807019				LOC115493692				TTK
	TLCD2	CAV2		SINHCAF	PVALB			ARID2		LOC115498279	NECTIN1	SAAL1		LOC100222323		ARX		RPL5		LOC115491181	SRP14	TMEM159		NRDE2	EMC2		SRD5A3			TWF2			LAMA1		PDCD2	TMEM271	LOC115495494		LOC116807076				LOC115493781				VRK2
	TMEM125	CAVIN4		SLC1A4	PYROXD1			ARID5A		LOC115498503	NLGN4X	SCT		LOC100227837		AS3MT		RPL7		LOC115491200	SUOX	TMEM165		NUBPL	EMC7		STX18			UBE4A			LAMA2		PDE7A	TMEM63B	LOC115495505		LOC116807077				LOC115493808				ZBTB24
	TMEM52	CBFA2T2		SMG6	RAD51AP1			ARID5B		LOC115498507	NOVA1	SDHAF2		LOC100229435		ASAP3		RPL7A		LOC115491510	SUPT6H	TMX1		NUDT14	EMSY		TACC3			UNC5A			LAMC1		PDZRN4	TOGARAM1	LOC115495665		LOC116807079				LOC115494100
	TMEM63A	CBFA2T3		SPRY2	RANGAP1			ARL13A		LOC116806616	NPEPPS	SERGEF		LOC100230295		ASB10		RPL7L1		LOC115491955	TFIP11	TPM3		NUSAP1	ENDOU		TDO2			USP44			LAMC3		PHACTR1	TOX3	LOC115495758		LOC116807113				LOC115494369
	TRPM2	CBLN1		SQLE	RASSF3			ARL14		LOC116806740	NPPA	SLC22A18		LOC100231740		ASB13		RPL9		LOC115492340	TP53INP2	TRMT6		PAMR1	ENPP7		TEC			USP5			LCN15		PHF14	TP53INP1	LOC115495779		LOC116807221				LOC115494481
	TSPAN2	CCDC125		SREBF2	RECQL			ARL15		LOC116806780	NR2F2	SLC25A22		LOC100232607		ASCC1		RPLP0		LOC115492342	TRAM1	TXNDC12		PDHX	ENTPD1		THAP9			WDR81			LDLRAP1		PHGDH	TRIM9	LOC115495992		LOC116807222				LOC115494516
	UGP2	CCDC30		SRGAP2	REP15			ARL16		LOC116807559	NRG1	SLC51B		LOC101234126		ASCC3		RPLP1		LOC115492346	TRNAA-AGC_2	UBA3		PHRF1	EP400		THNSL2			ZDHHC9			LEPR		PIK3IP1	TRMT11	LOC115496047		LOC116807226				LOC115494740
	UGT8	CCDC50		SSTR2	RIC8B			ARL4A		LOC116807791	NRXN1	SLC5A12		LOC101234197		ASPA		RPLP2		LOC115492496	UBTF	UBB		PIGH	EPB41		TMEM154			ZNF800			LGALS3		PITPNC1	UBE3B	LOC115496118		LOC116807229				LOC115495067
	USP6NL	CCDC91		TENT5D	RINT1			ARL6		LOC116808214	NUCKS1	SLCO2A1		LOC105758694		ASS1		RPS11		LOC115492508	USP19	UBE2D2		PINX1	EPB41L5		TNIP2			ZNRF1			LIMS2		PLCD3	UNC13A	LOC115496198		LOC116807239				LOC115495212
	VAMP8	CCNE1		TFCP2L1	SAV1			ARMC6		LOC116808623	NUFIP2	SLN		LOC105759181		ASXL1		RPS12		LOC115492576	USP36	UBE2I		PLA2G4F	ERCC8		TUSC3						LOC100217663		PLPPR3	VPS4A	LOC115496264		LOC116807241				LOC115495508
	ZBTB44	CD164		TLL1	SEC61A2			ARMC7		LOC116808638	PACSIN1	SMAGP		LOC105760670		ASXL2		RPS13		LOC115492664	VTA1	UBE2N		PLEKHA7	ERH		ZCCHC4						LOC100217969		PPIL2	WDTC1	LOC115496344		LOC116807242				LOC115495535
	ZNF365	CD59		TMEM150C	SEMA3E			ARNTL		LOC116808782	PCDH7	SMIM38		LOC115490676		ATAD1		RPS14		LOC115492667	VWA5B2	UBE2V2		PPP1R14D	ERLEC1		ZGPAT						LOC100218092		PPP2R2C	XKR7	LOC115496358		LOC116807243				LOC115495652
	ZNF469	CD86		TMEM275	SGSM3			ARPC1A		LOC116808827	PDHA1	SOX6		LOC115491137		ATAD2		RPS15		LOC115492670	WDR33	VDAC1		PRKCH	ESR1								LOC100218607		PPP4R2	XPO6	LOC115496359		LOC116807245				LOC115495694
		CD96		TMEM38B	SH2D4B			ARPC4		LOC116808853	PFKFB3	SPON1		LOC115491286		ATAD3A		RPS15A		LOC115492673	WIPF2	VPS33A		PRORP	ETFA								LOC100219184		PPP4R3A	YTHDF2	LOC115496369		LOC116807248				LOC115495729
		CDC42EP3		TMEM74	SLC17A8			ARPC5L		LOC116808871	PHF20	SSH3		LOC115492038		ATCAY		RPS16		LOC115492675	ZC3H18	VSNL1		PRR5L	ETS1								LOC100219422		PREPL	ZNF142	LOC115496410		LOC116807257				LOC115495857
		CDCA7		TOX	SLC25A3			ARRB1		LOC116808998	PLCL1	SVIP		LOC115492105		ATE1		RPS17		LOC115493017		WDR5		PSMC1	ETV6								LOC100220008		PRKCA	ZNF609	LOC115496446		LOC116807518				LOC115495862
		CDH10		TRIM36	SLC37A3			ARRDC2		LOC116809009	PNPLA2	SWAP70		LOC115492207		ATF1		RPS20		LOC115493244		ZBTB8A		PTDSS2	EXOC7								LOC100220024		PRKD3	ZNRF3	LOC115496458		LOC116807547				LOC115495934
		CDH11		TRMT1L	SLC9A3R2			ARRDC3		LOC116809136	POLQ	SYT12		LOC115492722		ATF2		RPS21		LOC115493246				PTGR2	EXOSC9								LOC100220125		RAB39B		LOC115496468		LOC116807602				LOC115496004
		CDH12		TRMT44	SMC1B			ARSA		LRATD2	POU2F1	TH		LOC115493062		ATF6		RPS23		LOC115493263				PTPMT1	FAM114A2								LOC100220807		RAP2B		LOC115496551		LOC116807930				LOC115496015
		CDH17		TRPC5	SMIM30			ASAP2		LRRC23	PPARGC1B	TK2		LOC115493242		ATG14		RPS24		LOC115493268				PTPRJ	FAM117B								LOC100221095		RAPGEF4		LOC115496564		LOC116807931				LOC115496291
		CDH2		TTC5	SNIP1			ASB6		LRRC43	PPFIA1	TOLLIP		LOC115493452		ATG16L1		RPS25		LOC115493272				RAD51B	FAM177A1								LOC100221217		RASGEF1C		LOC115496636		LOC116808115				LOC115496335
		CDH20		UBXN2A	SPAM1			ASB7		LTK	PPIG	TRIM66		LOC115493471		ATP11C		RPS26		LOC115493466				RAPSN	FAM32A								LOC100221245		RCAN2		LOC115496797		LOC116808152				LOC115496566
		CDH9		UMODL1	ST13			ASB8		LURAP1L	PPP3CA	TRNAF-GAA_2		LOC115493485		ATP1A1		RPS27		LOC115493497				RPS6KL1	FAM83H								LOC100221256		RGS19		LOC115496828		LOC116808168				LOC115496792
		CDHR1		UNC5B	STK38L			ASCL2		MAP3K19	PPP3CB	TRPM6		LOC115493652		ATP2B1		RPS27A		LOC115493722				RWDD2B	FARSB								LOC100221565		RGS8		LOC115496842		LOC116808424				LOC115496930
		CDK8		UNC5D	SYCE3			ASIC1		MIR2978	PPP3CC	TSPAN32		LOC115493851		ATP6AP1L		RPS29		LOC115493736				SLC25A21	FASN								LOC100221772		RIMS1		LOC115496917		LOC116808488				LOC115496979
		CDKL2		USP28	SYCP3			ASIC3		MLPH	PRPF40A	TUBA8		LOC115493916		ATP6V1A		RPS3		LOC115493928				SLC38A6	FBXO45								LOC100223273		RLIM		LOC115496969		LOC116808708				LOC115497009
		CDS2		VAT1L	TERB2			ASNS		MRPL32	PSAP	TXNDC11		LOC115494107		ATP6V1B1		RPS3A		LOC115493930				SLC39A13	FGF12								LOC100223320		RMND5A		LOC115497343		LOC116808785				LOC115497079
		CDT1		VXN	TMBIM4			ASPHD2		MRPL44	PUM1	ZDHHC13		LOC115494282		ATP6V1E1		RPS4X		LOC115494264				SLC39A9	FGF22								LOC100224093		RNF139		LOC115497607		LOC116808814				LOC115497232
		CEBPG		WDR1	TMED6			ASPN		MYO3B	PUM2	ZP1		LOC115494390		ATP7A		RPS6		LOC115494495				SOCS4	FH								LOC100224590		RYR2		LOC115497609		LOC116808860				LOC115497294
		CELF6		WDR45B	TMEM19			ASPSCR1		MYO7A	PURA			LOC115494476		ATP7B		RPS7		LOC115494876				SPATA1	FITM2								LOC100224644		SCML2		LOC115497615		LOC116808868				LOC115497320
		CELSR1		ZDHHC15	TOMM22			ATAT1		MYT1	PURB			LOC115494683		ATP8A1		RPS8		LOC115494878				SPINT1	FKBP1B								LOC100224866		SCN8A		LOC115497795		LOC116809025				LOC115497435
		CEP131		ZNF821	TPRKB			ATG10		N4BP2L1	RABGAP1			LOC115494758		ATP8A2		RPSA		LOC115495006				SPTLC2	FNDC7								LOC100225050		SCRT1		LOC115497827		LOC116809208				LOC115497775
		CEP76		ZNF831	TRIM24			ATG101		NANOS3	RABL6			LOC115494816		ATP8B2		SCAF8		LOC115495062				SPTSSA	FOXO6								LOC100225315		SEMA3A		LOC115497936		LOC116809240				LOC115497833
		CERKL			TSPO			ATG2B		NEK5	RBBP4			LOC115494819		ATP9A		SDAD1		LOC115495202				SSTR1	FRRS1								LOC100226561		SEMA4B		LOC116807450		LOC116809276				LOC115497864
		CETP			TTC26			ATG4A		NPBWR2	RBBP5			LOC115494852		ATP9B		SEC61G		LOC115495203				ST3GAL4	FRS2								LOC100226645		SFXN1		LOC116807936		LOXHD1				LOC115498225
		CFAP58			TWF1			ATG4D		NR1H3	RBM39			LOC115494890		ATRN		SIKE1		LOC115495405				STX3	GDAP1L1								LOC100227535		SIK2		LOC116808081		LPL				LOC115498355
		CFL2			TXNRD1			ATG9B		NRP2	RERE			LOC115495053		ATRNL1		SMPD4		LOC115495436				STYXL1	GDAP2								LOC100227872		SLC25A10		LOC116808216		LVRN				LOC115498416
		CFTR			UGDH			ATL1		ODF2L	RFNG			LOC115495144		ATXN7		SNRPF		LOC115495442				SYNE3	GIN1								LOC100228510		SLC25A46		LOC116808273		MARCHF3				LOC115498505
		CHAT			VIT			ATM		P3H2	RIMS3			LOC115495197		AUH		SNRPG		LOC115495547				TAF5	GLI3								LOC100228623		SLC30A9		LOC116808426		MARVELD2				LOC116806620
		CHEK1			VT1			ATOH7		PAPPA2	RNPEPL1			LOC115495205		AURKAIP1		SS18L1		LOC115496209				TDP1	GLRX2								LOC100229617		SLC38A1		LOC116808462		MASTL				LOC116806846
		CHGB			VWF			ATP10B		PDE5A	ROBO2			LOC115495984		AVL9		SS18L2		LOC115496342				TDRD9	GNA12								LOC100230113		SLC38A2		LOC116808483		MBLAC2				LOC116807005
		CHRM4			WASHC4			ATP11A		PDE6H	RTN4			LOC115496037		AZIN1		SUDS3		LOC115496401				TGFB3	GORASP2								LOC100230348		SLC41A3		LOC116808492		MCCC2				LOC116807010
		CHRNA10			WEE2			ATP13A2		PGF	RXRA			LOC115496239		AZIN2		TEKT4		LOC115496459				TIMM10	GPA33								LOC100230638		SLC45A4		LOC116808509		METTL23				LOC116807014
		CHRNA4			WNT16			ATP13A3		PHACTR4	SCCPDH			LOC115496887		B3GALNT1		THADA		LOC115496483				TIPIN	GPN1								LOC100230978		SMARCAL1		LOC116808576		MFSD2B				LOC116807041
		CHRNA5			XPNPEP3			ATP4A		PIDD1	SCD			LOC115497069		B3GALT5		TIAM2		LOC115496545				TMED8	GREM2								LOC105758935		SMS		LOC116808603		MIR23				LOC116807379
		CHRNA6			YARS2			ATP5F1A		PLAGL1	SEMA6A			LOC115497111		B3GNT2		TMED10		LOC115496584				TMEM229B	GRPEL1								LOC105759498		SNTG1		LOC116808605		MPDZ				LOC116807408
		CHRNG			YEATS4			ATP5F1B		PLBD1	SEPTIN7			LOC115497147		B3GNTL1		TMEM167A		LOC115496802				TMEM251	GRSF1								LOC105759512		SNX25		LOC116808627		MRPS27				LOC116807712
		CHST10			ZCRB1			ATP5F1D		PLEK2	SERINC3			LOC115497185		B4GALT6		TMEM50A		LOC115496888				TMEM258	H6PD								LOC105760850		SOS1		LOC116808684		MTMR12				LOC116807846
		CHST2			ZNF277			ATP5IF1		PLEKHM2	SETBP1			LOC115497273		BABAM2		TOB2		LOC115497026				TMEM62	HADH								LOC105760871		SOX13		LOC116808706		MYORG				LOC116807881
		CHST7			ZNF341			ATP5MC1		POPDC3	SF3A1			LOC115497284		BACH1		TPRG1L		LOC115497139				TNFAIP2	HAUS2								LOC115490879		SPAG16		LOC116808786		NAA35				LOC116807944
		CHSY3						ATP5MG		PRXL2C	SGMS2			LOC115497726		BACH2		TPT1		LOC115497268				TRAPPC6B	HEATR6								LOC115491080		SST		LOC116808791		NANS				LOC116808026
		CITED2						ATP5PD		PTBP1	SH3PXD2A			LOC115498075		BAG2		TRAF3IP1		LOC115497269				TSHR	HEBP2								LOC115491202		STK24		LOC116808949		NLN				LOC116808044
		CKAP4						ATP5PO		PTEN	SKI			LOC115498240		BAG3		TRNAI-AAU_1		LOC115497425				TTC8	HELZ								LOC115491269		STK26		LOC116809165		NMRK1				LOC116808080
		CKB						ATP6V0B		RFLNB	SKOR2			LOC115498500		BAHD1		TSPAN4		LOC115497447				TTLL5	HELZ2								LOC115491358		STK39		LOC116809186		NOX1				LOC116808099
		CLDN20						ATP6V1B2		RGS22	SLC44A3			LOC115498575		BAIAP2L1		TTC39C		LOC115497448				UBR1	HIC2								LOC115491968		STRBP		LOC116809228		NSA2				LOC116808176
		CLIC5						ATP6V1F		RIBC2	SLC44A5			LOC116807369		BBS9		TUBGCP3		LOC115497571				UBR7	HIGD1A								LOC115492201		STXBP6		LRRC58		OSTF1				LOC116808252
		CLIP1						ATP6V1G1		RPS6KA2	SLC6A11			LOC116807505		BCL2L10		TXNRD3		LOC115497720				VASH1	HIPK2								LOC115492379		SYT9		LYG2		OXCT1				LOC116808263
		CLMP						ATPAF1		RSPH3	SLTM			LOC116807609		BCL2L13		UBA52		LOC115497760				VIPAS39	HMBS								LOC115492495		TANC1		MAB21L3		PDE8B				LOC116808461
		CLRN2						ATPAF2		RSPH4A	SMC3			LOC116807722		BCL2L14		UBE2F		LOC115497921				VPS18	HOOK3								LOC115492534		TBC1D22A		MALSU1		PERCC1				LOC116808653
		CMC4						ATRAID		RXFP3	SMIM5			LOC116807727		BCL6		UBE4B		LOC115498310				VPS39	HPSE								LOC115492551		TBK1		MAN1A2		PEX14				LOC116808693
		CMKLR1						ATXN7L2		S100Z	SMNDC1			LOC116807728		BCLAF3		UBTD2		LOC115498347				VRK1	HRAS								LOC115493488		TLK2		MBTPS2		PHAX				LOC116808817
		CMYA5						AUP1		SFT2D2	SNN			LOC116807939		BCO2		UNC45B		LOC115498496				WARS1	HS1BP3								LOC115493521		TLN2		ME3		PIP5K1B				LOC116808857
		CNN1						AUTS2		SH3D19	SOGA1			LOC116808025		BHLHA15		UROC1		LOC116806621				WDR25	HSD17B4								LOC115493860		TMSB4X		MED17		PLAA				LOC116808875
		CNOT7						AXIN2		SLC26A4	SRFBP1			LOC116808033		BICDL1		VSIG10		LOC116806631				WEE1	IARS2								LOC115493867		TPBGL		METTL16		POLK				LOC116808961
		CNTFR						B4GALT1		SLC35D2	ST6GAL1			LOC116808249		BIN1				LOC116806700				XRCC3	IER3IP1								LOC115494090		TRAPPC13		MFSD9		PPIC				LOC116809070
		CNTN5						B4GALT3		SLC46A1	STK11			LOC116808454		BIRC6				LOC116806702				ZAR1L	IFNLR1								LOC115494614		TRHDE		MICU2		PRKAA1				LOC116809149
		CNTN6						B4GALT7		SLC46A2	STK25			LOC116808544		BIRC7				LOC116807069				ZBTB42	IFRD1								LOC115494793		TRIOBP		MIPEP		PTBP3				LOC116809168
		COCH						B4GAT1		SLIT2	SUPT5H			LOC116808609		BLMH				LOC116807209				ZFP91	IGDCC4								LOC115494810		TTLL7		MRE11		RCL1				LOC116809200
		COL17A1						B9D1		SMIM35	SURF4			LOC116808646		BMP1				LOC116807214				ZFYVE26	IKBKB								LOC115494841		UBE2W		MRPL57		RFK				LOC116809216
		COL23A1						BABAM1		SNCG	SYNCRIP			LOC116808816		BMP2				LOC116807473				ZNF770	IKZF4								LOC115494879		UBE3A		MSL3		RNF145				LOC116809241
		COL25A1						BAG4		SOCS7	SYT1			LOC116808872		BMP2K				LOC116807474					IL4I1								LOC115494931		USP31		MTIF3		SAXO1				LOC116809246
		COL26A1						BAK1		SPAG17	TAF3			LOC116809029		BMP7				LOC116807706					ILKAP								LOC115495221		VASN		MTMR2		SELENOP				LOC116809334
		COL2A1						BANP		SPEF1	TAOK3			LOC116809037		BMPR1A				LOC116807945					IMMP1L								LOC115495222		VDAC2		MTMR6		SGPP1				LUC7L
		COL5A1						BAZ1B		SPEF2	TBL1XR1			LOC116809107		BMPR1B				LOC116808061					INIP								LOC115495346		VGF		MTRF1		SIGLEC15				LUC7L3
		COL5A2						BBIP1		ST14	TCP11L1			LOC116809230		BMPR2				LOC116808170					INPPL1								LOC115495433		VPS4B		N4BP2L2		SIGMAR1				MAN2A2
		COL6A3						BCAN		STC1	TET3			LPAR3		BORA				LOC116808420					INTS14								LOC115495435		WNT5A		NARS2		SLC1A7				MAP2K2
		CORT						BCAR1		STOX1	THRAP3			LRRC8A		BORCS8				LOC116808508					INTS2								LOC115495484		WWP1		NCAPD2		SLC25A40				MBTD1
		CPB1						BCAS3		TENM2	TMEM26			LRRTM3		BPTF				LOC116808615					IQCH								LOC115495681		YAF2		NECAP1		SLC26A6				MCAM
		CPEB1						BCAT1		TFAP2C	TMEM87A			LTV1		BRAP				LOC116808635					IQGAP2								LOC115495834		YJEFN3		NEK3		SLC4A2				MED12
		CPEB2						BCDIN3D		TGFBI	TNPO1			MAD2L1BP		BRAT1				LOC116808819					ISCA1								LOC115495932		ZDHHC17		NHLRC3		SNAPC3				MELTF
		CPNE2						BCKDK		TLL2	TNRC6B			MAFB		BRD3OS				LOC116808842					ISCA2								LOC115496320		ZNF839		NPBWR1		SNX2				METAP1D
		CPNE9						BCL10		TMEM114	TNRC6C			MANBAL		BRD8				LOC116808996					ITGA11								LOC115496396		ZNRF2		NSUN3		SPPL2A				MIR2985-1
		CPPED1						BCL2		TMEM255B	TOP1			MARCHF5		BRI3BP				LOC116809013					ITM2B								LOC115496409				NUDT15		SRM				MIRLET7D
		CPT2						BCL2L1		TNFAIP3	TRIM71			MARVELD1		BRIP1				LOC116809122					KARS1								LOC115496644				NUFIP1		SSPN				MLLT10
		CRACR2B						BCL2L11		TRIM37	TSHZ2			MAVS		BRIX1				LOC116809123					KBTBD4								LOC115497098				NYX		TAL2				MLXIP
		CREB5						BCL7A		TRPC4	TSPAN14			MBD4		BRMS1L				LOC116809221					KCND3								LOC115497219				P2RY8		TDRD7				MMP17
		CRIM1						BCL7B		TSKU	TSPAN3			MCF2L		BRS3				LOC116809233					KCTD15								LOC115497245				PANX1		TMOD1				MOS
		CRISPLD1						BCR		TUBB1	TSPAN5			MCTS1		BRWD1				LOC116809314					KDM4B								LOC115497275				PCCA		TNFRSF18				MPLKIP
		CRMP1						BDP1		UBXN11	TUBB			MESD		BRWD3				LPAR5					KHDRBS1								LOC115497412				PCDH8		TRIM14				MSH4
		CRY1						BET1L		UROS	TULP4			MFSD11		BSG				LPXN					KHK								LOC115497663				PCDH9		TTC37				MTF2
		CRYBB1						BFAR		USP33	UBAC2			MICU3		BTBD18				MDFI					KIAA0232								LOC115497939				PCID2		WDR31				MYH9
		CSNK1A1						BGLAP		UVRAG	UBAP1			MIGA1		BTBD2				MICAL1					KIAA0556								LOC115497946				PDCL3		WDR41				MYO1E
		CSNK1E						BHLHE23		VCL	UBAP2L			MINDY3		BTBD3				MKI67					KIAA0930								LOC115498446				PGR		XKR5				MYO9B
		CSNK1G1						BHLHE40		WDR78	UBE2K			MIS18BP1		BTBD6				MMAB					KIAA1958								LOC115498583				PIGA		ZFYVE1				NCOA3
		CSRP3						BICC1		WDR93	UGCG			MKNK2		BTG4				MOV10					KIAA2026								LOC116806634				PINK1		ZNF131				NDRG3
		CST7						BICD2		WIPF3	UPF1			MOSMO		BTRC				MYO1H					KIF13A								LOC116806697				PNPLA4						NECAP2
		CSTF3						BICRAL		WNT2	UPF2			MTDH		BYSL				MZB1					KIFBP								LOC116806736				POGLUT3						NFE2L3
		CTBP2						BIVM		WNT7A	UPF3A			N4BP1		C10H15orf40				NFKBID					KLF11								LOC116806871				POPDC2						NFRKB
		CTCFL						BLCAP		WT1	UPF3B			NATD1		C10H15orf48				NLRC3					KLHL8								LOC116807140				PPP2R3B						NFS1
		CTNNA2						BMI1		YAP1	USP42			NCAPH2		C11H16orf70				NLRC5					KPNA6								LOC116807372				PRCP						NKTR
		CTPS1						BMP10		ZDHHC1	VCP			NEK6		C14H16orf72				NMI					KRTCAP2								LOC116807409				PRKX						NNT
		CTSL						BMT2		ZRANB1	XKR4			NETO2		C17H9orf116				NUF2					LAMA3								LOC116807513				PROS1						NOS2
		CUTA						BNIP3			XKR6			NFIC		C18H17orf80				OMD					LAMC2								LOC116807668				PROZ						NPM3
		CUX1						BOD1			YY1			NFYA		C1AH22orf23				ORC1					LARP1								LOC116807709				PRSS2						NR3C2
		CUZD1						BOLA1			ZBTB39			NIPA1		C1H11orf54				OSMR					LAS1L								LOC116807717				PRSS23						NUP155
		CX3CL1						BOLA3			ZBTB7A			NKAIN2		C1QTNF2				PARP10					LATS2								LOC116807838				PUDP						OGT
		CXADR						BOP1			ZC3H13			NOMO3		C20H20orf204				PARP9					LDHB								LOC116808082				QTRT2						OIT3
		CXXC4						BORCS6			ZC3H6			NT5E		C21H1orf159				PAX5					LIPH								LOC116808235				RAB39A						PAWR
		CXXC5						BPIFB2			ZDHHC6			NT5M		C21H1orf50				PCYOX1					LMO1								LOC116808267				RABL3						PCF11
		CYP2J19A						BRCC3			ZHX2			NUP107		C22H2orf42				PDCD1LG2					LMOD3								LOC116808470				RBBP7						PDIK1L
		CYRIB						BRD1			ZNF281			OBI1		C26H1orf116				PITX1					LOC100189957								LOC116808588				RCBTB1						PDLIM7
		CYSLTR2						BRF1			ZNF326			P2RX4		C26H6orf89				PLSCR1					LOC100190355								LOC116808841				RFC3						PECR
		CYSRT1						BRF2			ZNF362			P4HA3		C2CD2L				POU2AF1					LOC100190416								LOC116808971				RGCC						PGAP2
		CYTH4						BRI3			ZNF410			PABPC1		C2H18orf63				PRDM1					LOC100190483								LOC116809038				RHNO1						PHACTR2
		DACH1						BRICD5			ZNF512			PAICS		C2H1orf35				PROX2					LOC100190491								LOC116809130				RNF17						PHKA1
		DACT1						BRINP1			ZNF703			PAK1IP1		C4H20orf194				PTPN22					LOC100190503								LOC116809244				RNF6						PHKB
		DAPK2						BRK1						PDK1		C4H20orf27				PTPRC					LOC100190699								LOC116809263				RUFY4						PIK3C2A
		DAPL1						BSCL2						PELO		C4H4orf19				PTPRCAP					LOC100218354								LONRF1				SCNN1A						PKD2L1
		DBX1						BSDC1						PEX13		C4H4orf46				RAB44					LOC100218918								LOX				SERTM1						PKN2
		DCBLD1						BSN						PGGHG		C4H4orf50				RAC2					LOC100219261								LOXL2				SFRP4						PLAG1
		DEPDC1B						BSND						PHF2		C5				RBM43					LOC100219615								LPP				SGCA						PNISR
		DES						BTBD17						PHYHD1		C5H11orf91				RGS1					LOC100221701								LTBP2				SHROOM2						POFUT1
		DESI2						BTBD19						PIEZO1		C6H10orf143				RGS18					LOC100222254								LUM				SKA3						POMT2
		DEXI						BTBD9						PIFO		C7H21orf58				RHOF					LOC100223087								LYRM1				SLC35F2						PROC
		DGKZ						BUD23						PIGG		C8G				RHPN2					LOC100224495								MANBA				SLC6A1						PTBP2
		DHCR7						C10H15orf61						PLA2G15		C8H1orf146				RNF212					LOC100225003								MCF2				SLC9A7						PTPN13
		DHDH						C14H16orf91						PLPP4		C9				RNF213					LOC100225057								MDFIC				SLITRK5						PUM3
		DHRSX						C14H7orf26						PMS2		C9H2orf72				RSAD2					LOC100226034								MEOX2				SLITRK6						R3HDM1
		DIO3						C15H12orf43						PNPLA8		C9orf72				RUNX3					LOC100226070								METTL11B				SMAD9						RAB14
		DIPK2A						C17H9orf16						POLR2B		CA7				RXRG					LOC100226286								MFAP5				SPATA13						RAB41
		DIRAS2						C1GALT1						PPP1CB		CACFD1				SELE					LOC100226437								MICAL2				SPDEF						RADX
		DISP1						C1H12orf57						PPP1R2		CACHD1				SERPINE2					LOC100226718								MKRN2				SPICE1						RASA2
		DISP2						C1QL2						PREX1		CACNA1B				SERPING1					LOC100229276								MMEL1				SPRYD7						RBMX
		DLG3						C1QTNF4						PRKAR2B		CACNA1D				SH2D1A					LOC100229646								MMP2				ST6GALNAC2						REV1
		DLGAP5						C1QTNF5						PRKCI		CACNA1E				SIX6					LOC100229949								MRC2				STS						REXO5
		DLK1						C22H2orf68						PRKCZ		CACNA2D1				SLC23A1					LOC100230361								MSC				TAF1D						RGP1
		DLX6						C22H8orf58						PRPF39		CACNA2D4				SLC26A9					LOC100231116								MST1				TBC1D4						RHBDD2
		DMRT2						C23H1orf216						PSEN1		CACNB2				SMKR1					LOC100231218								MSX2				TBC1D8						RIC1
		DMRT3						C24H11orf52						PTPN5		CACNG1				SPIC					LOC100231240								MXRA5				TCEANC						RICTOR
		DNA2						C26H1orf74						PYGO1		CACTIN				SRGN					LOC100231722								MXRA8				TEAD4						RIPK1
		DNAI2						C27H17orf113						RAB21		CADM2				STAT1					LOC100232125								MYC				TEX30						RMI1
		DNAJB5						C28H19orf25						RAB2A		CADPS				SYTL1					LOC100232500								MYOF				TM9SF2						RNPC3
		DNER						C2H8orf34						RAB33B		CALB2				SYTL3					LOC100232580								MYOT				TMCO3						RNPEP
		DNMBP						C3AR1						RAB35		CAMK1D				TBX19					LOC100232751								NID1				TMEM123						RRP36
		DOC2B						C5H11orf96						RAB4A		CAMKK1				TBX21					LOC101232870								NID2				TMEM139						RTN1
		DOCK10						C5H15orf41						RAB5A		CAMKK2				TENT5C					LOC101233349								NUDT4				TMEM182						RYR3
		DOCK2						C8A						RAB5B		CAMSAP1				TLDC2					LOC101233369								OCSTAMP				TNFRSF19						SBNO2
		DOK4						C8H1orf21						RAB8B		CAMSAP2				TMEM156					LOC101233878								OLFML3				TNFRSF1A						SCN2B
		DOK5						C9H3orf33						RAB9A		CAND1				TNFRSF13B					LOC101234062								ONECUT3				TRPC6						SDCBP
		DOK7						CA10						RAD23B		CANX				TNFSF13B					LOC105759147								OSR1				TUBGCP5						SDE2
		DPP6						CA14						RADIL		CAPN10				TOR1B					LOC105759381								PANX3				UFM1						SEC23B
		DPYD						CA6						RALA		CAPZB				TRAF3IP3					LOC105759403								PAPLN				UGGT2						SEC62
		DPYSL3						CAAP1						RANBP1		CARMIL1				TRAFD1					LOC105760502								PBK				USP35						SEMA5B
		DRD2						CAB39						RARG		CARNMT1				TRIM25					LOC105760992								PCDH18				VEGFD						SETD9
		DRD3						CABLES2						RBM6		CARTPT				TSPAN33					LOC115490701								PCSK6				VPS36						SF3B1
		DRD4						CABP1						RCBTB2		CASKIN2				UBASH3A					LOC115490731								PDLIM1				VTCN1						SFPQ
		DRD5						CACNA1C						RCN2		CAT				UNC13D					LOC115490942								PDPN				VWA8						SFSWAP
		DTWD1						CACNB1						REEP5		CATIP				URGCP					LOC115490945								PDZK1IP1				WASF3						SHC3
		DUSP1						CACNB3						RGMB		CAVIN1				USP18					LOC115490978								PERP				WIZ						SIDT2
		DUSP16						CALHM3						RHBDF2		CBL				XCR1					LOC115491011								PGD				ZRSR2						SIRT1
		DUSP4						CALML4						RNF138		CBLN4				XIRP2					LOC115491026								PHLDB1				ZYX						SIRT3
		DYDC1						CALR						RNF141		CBX6				ZNFX1					LOC115491143								PI15										SLC39A11
		DYNC1I1						CALU						RNF7		CBX7									LOC115491150								PID1										SLC7A1
		DYNLT3						CAMK1						RNGTT		CBX8									LOC115491174								PITX3										SLC7A14
		DYRK4						CAMK2B						RP2		CCDC137									LOC115491204								PKN3										SLITRK3
		E2F2						CAMK2N2						RPGRIP1L		CCDC14									LOC115491277								PKP1										SMCHD1
		E2F4						CAMKMT						RRAS2		CCDC15									LOC115491292								PKP2										SMIM24
		EBF1						CAMKV						RRN3		CCDC174									LOC115491327								PKP4										SNED1
		ECEL1						CAMP						SAP130		CCDC183									LOC115491432								PLA2G4A										SNX12
		ECHDC1						CAPRIN1						SAR1B		CCDC186									LOC115492315								PLEKHG4										SP3
		ECM1						CAPRIN2						SASH1		CCDC27									LOC115492367								PLN										SPIRE2
		EDARADD						CARM1						SCAMP1		CCDC6									LOC115492396								PMP22										SREK1
		EDC4						CARS1						SDC4		CCDC61									LOC115492532								PNPLA7										SRPRA
		EDIL3						CASC3						SDF4		CCDC71									LOC115492635								PRDM5										SRRM1
		EDN1						CASK						SEC31A		CCDC77									LOC115493033								PRDM6										SRSF11
		EDN3						CASP3						SEC61A1		CCDC84									LOC115493087								PRKG1										SRSF2
		EFCAB14						CASP6						SEC63		CCDC85C									LOC115493091								PRRX1										SRSF5
		EFL1						CASP8AP2						SECISBP2		CCDC93									LOC115493100								PRRX2										SRSF6
		EFNA5						CASTOR1						SEL1L3		CCL19									LOC115493238								RAB11FIP1										STARD9
		EFNB1						CBLB						SENP5		CCN1									LOC115493352								RASSF8										STON1
		EIF2B5						CBLL1						SF3A3		CCNA1									LOC115493375								RBPMS2										STX11
		EIF6						CBX3						SHC1		CCND2									LOC115493386								RNF212B										STXBP3
		ELFN1						CBX4						SHROOM3		CCNYL1									LOC115493446								ROBO3										SUPT20H
		ELL						CBX5						SHROOM4		CCP110									LOC115493489								RREB1										TARBP1
		ELP2						CCDC103						SLC12A8		CCPG1									LOC115493657								SCIN										TBC1D31
		EME1						CCDC115						SLC1A2		CCSAP									LOC115493682								SCN4A										TCERG1
		EMILIN2						CCDC124						SLC1A3		CCSER1									LOC115493823								SCUBE2										TENM4
		EMP2						CCDC134						SLC23A2		CCT2									LOC115493924								SCUBE3										THOC2
		EMX2						CCDC142						SLC2A4RG		CCT3									LOC115493934								SDK1										TMC6
		EN2						CCDC149						SLC2A6		CCT5									LOC115493936								SEMA3B										TMEM189
		EPHA10						CCDC167						SLC30A4		CD101									LOC115494009								SEMA3C										TMEM259
		EPHA8						CCDC171						SLC30A5		CD14									LOC115494157								SERPIND1										TMPO
		EPHB3						CCDC178						SLC31A1		CD2AP									LOC115494276								SERPINF1										TNFRSF8
		EPHB6						CCDC18						SLC38A10		CD34									LOC115494309								SERPINH1										TNFSF11
		EPS8L3						CCDC181						SLC39A6		CD99L2									LOC115494318								SFRP1										TNPO2
		ERCC1						CCDC191						SLC9A6		CDA									LOC115494321								SGCG										TRA2A
		ERCC6L						CCDC25						SMARCE1		CDC14A									LOC115494544								SIX1										TRPV1
		ERG						CCDC39						SNX14		CDC20B									LOC115494948								SIX2										TTC21B
		ERGIC2						CCDC43						SNX6		CDC23									LOC115494952								SIX4										TTLL4
		ERO1A						CCDC58						SOX1		CDC27									LOC115495045								SLC13A3										TUT4
		ESPNL						CCDC62						SOX8		CDC34									LOC115495075								SLC16A10										U2SURP
		ESRRB						CCDC73						SPAG9		CDC42BPA									LOC115495080								SLC16A12										UAP1L1
		ESRRG						CCDC88A						SPOPL		CDC42BPB									LOC115495082								SLC19A1										UBE2J2
		ESS2						CCDC92						SPTLC1		CDC42SE2									LOC115495181								SLC1A1										UBN2
		ETV1						CCDC9B						SQSTM1		CDC7									LOC115495186								SLC25A16										UCK2
		EXT1						CCKBR						SSR1		CDC73									LOC115495198								SLC26A1										USP45
		EYA1						CCM2						STRADA		CDH15									LOC115495264								SLC26A5										USPL1
		EZH1						CCM2L						STRADB		CDH22									LOC115495452								SLC26A7										VAMP7
		F2RL2						CCNB3						STX12		CDH4									LOC115495611								SLC2A9										VGLL1
		FAH						CCNDBP1						STX7		CDH5									LOC115495739								SLC38A4										VPS26A
		FAHD1						CCNE2						SUB1		CDK13									LOC115495966								SLC39A8										VWA3A
		FAIM2						CCNI						SUGP1		CDK14									LOC115496148								SLC45A2										WHAMM
		FAM110C						CCNK						SYNGR2		CDK17									LOC115496192								SLC5A11										WIPI2
		FAM118B						CCNL1						TAMALIN		CDK18									LOC115496220								SLC5A5										WSB1
		FAM135B						CCNT1						TAPT1		CDK3									LOC115496221								SLC6A4										XIAP
		FAM151B						CCNY						TBC1D12		CDK5RAP2									LOC115496222								SLC7A11										XPNPEP1
		FAM214B						CD164L2						TCTEX1D1		CDK6									LOC115496250								SMOC2										XPO4
		FAM234A						CD320						TENT4A		CDKL1									LOC115496251								SNAI1										XRN1
		FAM53A						CD40						THBS3		CDKL5									LOC115496403								SOCS3										YTHDC1
		FAM78B						CD47						TLCD4		CDKN1B									LOC115496629								SOD3										ZBTB2
		FAM81A						CD84						TLN1		CDV3									LOC115496777								SS18										ZBTB34
		FAM83A						CD8B						TM9SF3		CDYL2									LOC115496809								STAB1										ZCCHC8
		FAM98A						CDC25A						TMED7		CEBPD									LOC115496845								STRA6										ZFC3H1
		FAN1						CDC26						TMEM163		CELF5									LOC115496863								TBX15										ZFHX4
		FASTKD5						CDC42EP4						TMEM175		CELSR2									LOC115496932								TBX18										ZNF207
		FBXO16						CDC42SE1						TMEM242		CELSR3									LOC115496957								TBX20										ZNF335
		FBXO2						CDCP2						TMEM255A		CEMIP									LOC115497035								TBX22
		FBXO21						CDIP1						TMEM33		CEND1									LOC115497068								TC2N
		FBXW7						CDK10						TMEM41B		CENPI									LOC115497076								TCAF2
		FDFT1						CDK2						TMTC2		CENPX									LOC115497095								TFAP2A
		FEZF1						CDK2AP2						TMX3		CEP104									LOC115497142								TFAP2B
		FGD6						CDK5						TNKS1BP1		CEP170									LOC115497338								TGM2
		FGF10						CDK5R1						TNKS2		CEP20									LOC115497361								THBS1
		FGF13						CDK5R2						TNNT2		CEP350									LOC115497421								TIMP3
		FGF16						CDK5RAP1						TOMM20		CEP57									LOC115497455								TLR4
		FGF18						CDK9						TOR1AIP2		CER1									LOC115497630								TMEM37
		FGF5						CDR2						TPM2		CERS2									LOC115497951								TMPRSS9
		FIBIN						CDR2L						TRAPPC11		CERS6									LOC115497985								TNC
		FIGN						CDYL						TRAPPC2		CFAP73									LOC115498220								TNFAIP8
		FILIP1L						CEBPB						TRIM29		CFAP97									LOC115498258								TNS2
		FLRT2						CEL						TRNAD-GUC		CFI									LOC116806602								TP73
		FLRT3						CELF2						TRNT1		CGGBP1									LOC116806608								TRAM2
		FLVCR1						CENPJ						TSPAN13		CH25H									LOC116806791								TRPC3
		FN3K						CENPL						TTLL6		CHAC1									LOC116806873								TRPV4
		FNDC4						CENPT						UBAP2		CHAF1A									LOC116807075								TSPAN18
		FNDC5						CENPU						UBE2A		CHCHD1									LOC116807136								TTC29
		FNTM1						CEP152						UBE2H		CHD2									LOC116807249								TWIST1
		FOSL2						CEP170B						UBE2V1		CHD9									LOC116807251								TXNIP
		FOXF2						CEP250						UBXN2B		CHEK2									LOC116807252								UBE2T
		FPGT						CEP295						UBXN6		CHFR									LOC116807368								USP13
		FRMD4B						CEP89						UCHL3		CHORDC1									LOC116807429								VILL
		FRMD6						CEP97						UCKL1		CHRM3									LOC116807431								VIM
		FSBP						CERCAM						UCP3		CHRNB4									LOC116807435								WDR86
		FST						CERS3						UNC45A		CHRND									LOC116807551								WFIKKN2
		FSTL3						CERS5						URB2		CHST11									LOC116807647								WNT6
		FSTL4						CES2						USH1G		CHST13									LOC116807782								WNT7B
		FTSJ3						CFAP20						VAC14		CHST14									LOC116807794								XDH
		FZD10						CFAP298						VHL		CHST15									LOC116807856								ZAR1
		FZD4						CFAP57						VPS26C		CHST8									LOC116808125								ZFP36L1
		FZD5						CFAP74						WASHC3		CIAO2A									LOC116808184								ZGRF1
		G0S2						CGNL1						WDR4		CIB1									LOC116808244								ZIC1
		G3BP1						CGREF1						XPOT		CIP2A									LOC116808430								ZIC3
		G6PC2						CHAMP1						YIPF4		CIT									LOC116808479
		GABARAPL1						CHCHD10						ZBED4		CITED4									LOC116808505
		GABPB1						CHCHD2						ZBTB33		CKAP5									LOC116808562
		GABRA1						CHCHD4						ZFAND3		CLCC1									LOC116808571
		GABRD						CHCHD6						ZFAND4		CLCF1									LOC116808626
		GABRG2						CHD7						ZFP36L2		CLCN4									LOC116808686
		GAD1						CHDH						ZNF384		CLCN6									LOC116808696
		GAD2						CHERP						ZNF622		CLCNKA									LOC116808811
		GADD45G						CHIC1						ZNF830		CLDN1									LOC116808834
		GALNT1						CHIC2						ZRANB2		CLDN12									LOC116808904
		GALNT11						CHKA						ZW10		CLEC16A									LOC116809023
		GALNT14						CHKB								CLIP2									LOC116809031
		GALNT2						CHMP1A								CLIP4									LOC116809055
		GAP43						CHMP1B								CLMN									LOC116809065
		GAS2						CHMP6								CLPB									LOC116809169
		GASK1B						CHN2								CLPS									LOC116809170
		GATA2						CHODL								CLPX									LOC116809264
		GCAT						CHRDL2								CLSPN									LOC752003
		GCG2						CHRM2								CLSTN1									LRCH3
		GCGR						CHRNB2								CLTCL1									LRIT3
		GDF10						CHST12								CLUAP1									LRP3
		GDF9						CHTF18								CLUH									LRP4
		GDNF						CHTOP								CLUL1									LSM5
		GDPD4						CHURC1								CLVS1									LSM6
		GEMIN5						CIAO1								CMBL									LYRM4
		GFPT1						CIAO2B								CMTM8									LYVE1
		GFRA1						CIAO3								CNGB1									LZIC
		GGT5						CIART								CNKSR2									MAGOH
		GJA5						CIB2								CNNM2									MAP1LC3B
		GJB1						CILK1								CNNM4									MDFIC2
		GJC1						CISD3								CNOT1									MDGA2
		GJC2						CIZ1								CNOT10									MDH1
		GJD4						CKS1B								CNOT8									MDH2
		GK5						CLCN3								CNR1									ME1
		GLDC						CLDN14								CNST									MED31
		GLOD4						CLDN19								CNTD1									MEF2D
		GLP2R						CLDN5								CNTF									MEMO1
		GLRA3						CLDND1								CNTN3									METAP2
		GMPR						CLGN								CNTNAP2									MGAT3
		GNG2						CLINT1								CNTNAP5									MIER1
		GP1BB						CLK3								COASY									MIR1781
		GPALPP1						CLN6								COG3									MIR2970
		GPC3						CLN8								COL13A1									MIRLET7C-2
		GPCPD1						CLNS1A								COL19A1									MLYCD
		GPD1						CLP1								COL7A1									MMGT1
		GPER1						CLPP								COL9A3									MOCS2
		GPNMB						CLRN1								COMP									MORC2
		GPR156						CLRN3								COMT									MPC2
		GPR161						CLSTN3								COPS3									MRPL14
		GPR180						CLTC								COPS7B									MRPL16
		GPR20						CLU								COQ10B									MRPL18
		GPR22						CMPK1								COQ4									MRPL23
		GPR27						CMPK2								CORIN									MRPL47
		GPR3						CNGB3								CORO1C									MRPS17
		GPR6						CNKSR1								CORO6									MRPS25
		GPR78						CNNM1								COX19									MRPS30
		GPRIN1						CNOT6								CPD									MRPS31
		GPSM1						CNOT6L								CPLANE1									MRPS35
		GPSM2						CNOT9								CPM									MRPS6
		GREM1						CNPPD1								CPN1									MRPS9
		GRIA3						CNPY2								CPSF4									MTERF3
		GRIK1						CNTNAP1								CRABP1									MUC1
		GRIN3A						COG1								CRACD									MYMK
		GRIN3B						COG4								CRAT									MYO19
		GRM7						COG7								CRBN									MYO5C
		GRM8						COG8								CRCP									MYOG
		GSG1						COIL								CREB1									NAA60
		GSX2						COL11A1								CREB3L2									NAV2
		GTF2IRD1						COL16A1								CREB3L3									NDFIP1
		GUCD1						COL22A1								CREBL2									NDUFA4
		GYG1						COL8A2								CREG1									NDUFA5
		GYS2						COLEC12								CREG2									NDUFA9
		HACD1						COLGALT1								CRHBP									NDUFAB1
		HAPLN1						COMMD1								CRIP2									NDUFAF1
		HAS2						COMMD4								CRISP2									NDUFB10
		HASPIN						COPA								CRK									NDUFB5
		HCN1						COPE								CRLS1									NDUFS1
		HEPHL1						COPS5								CRY2									NDUFS3
		HNF4A						COPS7A								CRYM									NDUFS4
		HNRNPDL						COPZ1								CSAD									NEK9
		HNRNPH3						COQ10A								CSDE1									NFAT5
		HOXB7						COQ9								CSF3R									NHS
		HOXB8						CORO1B								CSGALNACT2									NIPA2
		HPCAL4						CORO2A								CSMD1									NKIRAS2
		HPDL						COX6A1								CSNK2A1									NKX2-2
		HPRT1						COX7B								CSRNP1									NOTCH2
		HRH1						COX7C								CSRNP3									NPC1
		HRH2						CP								CSRP1									NPEPL1
		HRH3						CPLX2								CSRP2									NPTN
		HS3ST1						CPNE3								CTBP1									NRDC
		HS3ST2						CPNE4								CTCF									NRN1
		HS3ST4						CPNE8								CTDSP1									NSDHL
		HS3ST5						CPOX								CTDSPL									NSMF
		HS6ST1						CPSF3								CTIF									NUS1
		HS6ST2						CPSF6								CTNNB1									OAZ1
		HSD17B7						CPT1B								CTNS									OLFM1
		HSDL2						CPTP								CTSH									OLIG3
		HTR1A						CRELD1								CTSK									ORMDL3
		HTR1D						CREM								CTSZ									OSBPL3
		HTR1F						CRH								CTTNBP2									PABPC1L
		HTR2A						CRISPLD2								CUEDC1									PACC1
		HTRA1						CRLF2								CUL4B									PAIP2
		HVCN1						CRLF3								CUL5									PAIP2B
		HYOU1						CRTC2								CUL9									PARK7
		IAPP						CRYBA1								CUNH19orf57									PARL
		IARS1						CRYBG3								CWC15									PATZ1
		IFITM10						CRYZL1								CWC25									PDCD5
		IFT88						CS								CX3CR1									PDCD6
		IGF2						CSDC2								CYGB									PDE6D
		IGFBP4						CSK								CYLD									PDIA2
		IGFBP5						CSNK1D								CYP19A1									PDP2
		IGSF11						CSNK2A2								CYTH3									PEMT
		IHO1						CSPG5								CZH18orf25									PFDN1
		IKBIP						CSTF2								CZH9orf64									PFDN2
		IL13RA2						CTBS								DAAM1									PGAM5
		IL15RA						CTH								DACH2									PGAP1
		IL17D						CTNNBIP1								DACT2									PGRMC1
		IL17RA						CTR9								DAZAP1									PHC3
		IL1R2						CTSA								DCAF10									PHF19
		IL1RAP						CTSO								DCAF12									PHF21B
		IL1RAPL1						CTTN								DCAF7									PIGO
		IL2RB						CTU2								DCAKD									PIGZ
		IMPA2						CTXN2								DCBLD2									PIK3C2G
		ING5						CUEDC2								DCP1A									PIPOX
		INHBA						CUL1								DCP1B									PKD2
		INKA2						CUNH6orf136								DCPS									PLAGL2
		INPP4B						CUTC								DCT									PLCXD2
		INPP5D						CWC27								DCTN2									PLEKHN1
		INPP5E						CWF19L1								DCUN1D1									PNO1
		INSM1						CYBASC3								DDA1									POFUT2
		INSR						CYFIP1								DDHD1									POLR2F
		INSRR						CYHR1								DDI2									POLR2G
		INSYN2A						CYP2AC7								DDX18									POMGNT2
		IPCEF1						CYP2W1								DDX43									PPA1
		IPO9						CYSTM1								DDX59									PPARD
		IPP						CYTH1								DEF6									PPCS
		IRAG2						CZH9orf40								DELE1									PPDPF
		IRF2BPL						CZIB								DENND11									PPIA
		IRS1						D2HGDH								DENND2A									PPID
		IRS2						DAB1								DENND2C									PPP1R10
		IRX6						DAD1								DENND4A									PPP1R7
		ISL1						DAG1								DENND6A									PPP2R3A
		ISX						DALRD3								DENR									PRDM11
		ITGA1						DAPK1								DEPDC5									PREX2
		ITGB3						DAPK3								DEPDC7									PRKAR1A
		ITGB4						DAW1								DERL1									PRKRIP1
		ITPKB						DAZAP2								DERL2									PROKR1
		ITPR3						DBI								DESI1									PRRC1
		JADE1						DBN1								DET1									PRRC2B
		JPH2						DBNDD1								DGCR2									PSMA3
		JPT1						DBNDD2								DGCR8									PSMA5
		KATNAL2						DBNL								DGKB									PSMC2
		KCNA10						DBR1								DGKD									PSMC6
		KCNA2						DCAF1								DGKE									PTPN14
		KCNA5						DCAF17								DGKH									PWP1
		KCNF1						DCLRE1B								DGKI									RAB28
		KCNH5						DCP2								DHRS7									RAC1
		KCNH7						DCTN1								DHTKD1									RACGAP1
		KCNH8						DCTN6								DHX15									RAI1
		KCNIP3						DCUN1D3								DHX16									RALGPS2
		KCNIP4						DCUN1D4								DHX33									RASSF2
		KCNJ15						DCX								DHX35									RBM45
		KCNJ2						DDAH1								DHX57									RBX1
		KCNJ5						DDHD2								DIABLO									RELN
		KCNJ6						DDIT4								DIAPH2									REV3L
		KCNK2						DDN								DICER1									REXO2
		KCNMB2						DDX23								DIDO1									RFC5
		KCNMB4						DDX31								DIO1									RMDN1
		KCNN3						DDX41								DIP2C									RNF114
		KCNQ4						DDX42								DIPK1A									RNF115
		KCNT1						DDX46								DIPK2B									RNF38
		KCNT2						DDX49								DIS3L									RNF43
		KCNV1						DDX54								DISP3									ROMO1
		KCTD2						DDX56								DIXDC1									RPGR
		KCTD20						DDX6								DKK1									RPP30
		KCTD4						DEDD								DLC1									RPP38
		KCTD6						DEF8								DLG5									RSPO1
		KCTD9						DENND1B								DLGAP1									RTKN2
		KDF1						DENND4B								DLGAP2									RTN4IP1
		KDM4C						DENND4C								DLX3									RTRAF
		KDSR						DENND6B								DMAP1									RXYLT1
		KEL						DEPTOR								DMGDH									RYBP
		KHDRBS3						DFFA								DMTF1									SAMM50
		KIAA1671						DGUOK								DMTN									SAP18
		KIF5B						DHCR24								DMXL1									SAT1
		KLF10						DHODH								DMXL2									SCOC
		KLF15						DHRS13								DNAAF3									SCRN3
		KLF5						DHRS7B								DNAJA1									SDR42E1
		KLF6						DHX29								DNAJA2									SELENOK
		KLHDC7A						DHX30								DNAJB2									SELENOS
		KLHDC8A						DHX8								DNAJB4									SEM1
		KLHL1						DHX9								DNAJC13									SEPHS1
		KLHL14						DIO2								DNAJC18									SEPTIN11
		KLHL15						DIPK1B								DNAJC19									SH2D3C
		KLHL22						DIRAS1								DNAJC28									SH3GL2
		KLHL30						DIRAS3								DNAJC5									SH3GLB1
		KLHL32						DIS3								DNAJC7									SH3RF1
		KRT222						DKC1								DNAJC8									SIGIRR
		KSR1						DLEC1								DNASE2B									SLC14A1
		L3HYPDH						DLGAP4								DNLZ									SLC15A2
		LACC1						DLK2								DNM1									SLC16A4
		LAMB2						DLL4								DNM3									SLC22A2
		LAMB4						DLST								DNMT3A									SLC30A6
		LARGE1						DLX2								DOCK11									SLC35E3
		LARS2						DMAC1								DOCK3									SLC4A11
		LBHD2						DNAH3								DOCK7									SLC9B2
		LCMT1						DNAH5								DOLK									SLX4
		LDLRAD3						DNAJA3								DOP1A									SMAD5
		LGALS8						DNAJA4								DOP1B									SMOX
		LGI2						DNAJB11								DPAGT1									SNAP25
		LGR6						DNAJB12								DPH5									SNRPC
		LHX2						DNAJC11								DPM2									SNRPD1
		LHX5						DNAJC17								DPP7									SNRPD3
		LHX8						DNAJC30								DPP8									SOX21
		LHX9						DNAJC5G								DPY19L3									SPCS2
		LIMD1						DNAJC9								DPY19L4									SPG11
		LINGO1						DNALI1								DPYS									SPPL3
		LINGO3						DNPEP								DRAM2									SRSF4
		LIPG						DNTT								DRC3									SSBP1
		LIX1L						DNTTIP1								DRD1									SSR3
		LLGL2						DNTTIP2								DRP2									STK36
		LMO4						DOHH								DSCAM									STMN1
		LOC100189933						DOT1L								DSG4									STRAP
		LOC100190002						DPCD								DST									STX16
		LOC100190031						DPEP1								DTD2									SUCLG1
		LOC100190135						DPF3								DUS1L									SUMO1
		LOC100190467						DPH1								DUSP11									SVEP1
		LOC100190622						DPH2								DUSP12									TAF12
		LOC100190710						DPH6								DUSP14									TAF13
		LOC100217562						DPM3								DVL1									TAF7L
		LOC100217703						DQX1								DYM									TAGLN3
		LOC100217839						DRAP1								DYNC1H1									TBC1D2B
		LOC100217945						DRC1								DYRK1A									TBC1D5
		LOC100218025						DRG1								DZANK1									TCEA2
		LOC100218227						DRG2								E2F3									TENM1
		LOC100218477						DROSHA								E2F7									TERF2
		LOC100218704						DSEL								E4F1									TET1
		LOC100218707						DTX2								EBI3									TFAM
		LOC100218769						DTX4								EBNA1BP2									TFDP1
		LOC100218771						DTYMK								ECE1									TGFBR3
		LOC100218905						DUS3L								ECHDC2									TIFA
		LOC100218931						DUSP15								ECHDC3									TIMM17A
		LOC100219012						DUSP26								ECI1									TIMMDC1
		LOC100219073						DUSP3								ECPAS									TKFC
		LOC100219113						DYNC1LI2								EDA									TLNRD1
		LOC100219300						DYNC2H1								EDEM3									TM2D1
		LOC100219398						DYNLRB1								EDN2									TM4SF19
		LOC100219651						DYNLT1								EEF2K									TMEM14A
		LOC100219675						DYRK2								EEF2KMT									TMEM178B
		LOC100219985						EARS2								EEPD1									TMEM18
		LOC100220296						ECE2								EFNA1									TMEM185A
		LOC100220302						ECHS1								EFR3A									TMEM213
		LOC100220618						ECSIT								EGFL7									TMEM263
		LOC100220756						EDC3								EGR1									TMPRSS6
		LOC100220760						EDNRB								EHBP1									TNFRSF9
		LOC100220796						EEF1A2								EIF2AK1									TNRC18
		LOC100220846						EEF1AKMT3								EIF3D									TNRC6A
		LOC100220906						EEF1AKMT4								EIF3I									TPI1
		LOC100220937						EEF1AKNMT								EIF3J									TPM4
		LOC100220978						EEF1G								EIF4E3									TPMT
		LOC100221042						EEF2								EIF4EBP2									TRAF1
		LOC100221073						EFCAB10								EIF4ENIF1									TRAF3
		LOC100221179						EFHC2								EIF4G2									TRAF6
		LOC100221249						EFHD2								EIF4H									TRMT10A
		LOC100221315						EFTUD2								EIPR1									TRMT2B
		LOC100221326						EGF								ELAPOR2									TSC22D1
		LOC100221380						EGFR								ELAVL1									TSG101
		LOC100221382						EGLN1								ELFN2									TSTD2
		LOC100221408						EGLN3								ELMO1									TTC12
		LOC100221413						EGR4								ELOVL6									TTC34
		LOC100221480						EIF1B								ELP1									TTLL1
		LOC100221517						EIF2A								ELP4									TVP23A
		LOC100221534						EIF2AK3								EMILIN3									TXN
		LOC100221543						EIF2B1								EML5									TXNDC17
		LOC100221606						EIF2B4								ENOX1									TXNDC5
		LOC100221947						EIF3B								ENOX2									TXNL4B
		LOC100222224						EIF3G								ENPEP									UAP1
		LOC100222299						EIF3H								ENPP5									UBE2G1
		LOC100222314						EIF4A3								ENTPD2									UBE2L3
		LOC100222403						EIF4B								EPB41L2									UCHL5
		LOC100222482						EIF4E2								EPB41L3									UNC50
		LOC100222632						EIF4EBP1								EPB41L4B									UNC79
		LOC100222777						ELAC2								EPC2									UPRT
		LOC100222802						ELAPOR1								EPG5									URM1
		LOC100222883						ELF3								EPHA4									USH2A
		LOC100222906						ELMO2								EPHA5									USHBP1
		LOC100222908						ELMOD2								EPHB2									UTP11
		LOC100222957						ELOF1								ERBIN									UTP15
		LOC100223070						ELP6								ERC1									UTP6
		LOC100223369						EMC10								ERCC3									VANGL1
		LOC100223410						EMC4								ERCC4									VBP1
		LOC100223643						EMC6								ERO1B									VMP1
		LOC100223670						EMID1								ERRFI1									VOPP1
		LOC100223706						EML1								ESYT2									VWA1
		LOC100223776						EMP1								ESYT3									VWA5B1
		LOC100224019						EN1								ETF1									WASF2
		LOC100224234						ENAH								ETFRF1									WBP2NL
		LOC100224487						ENDOG								ETNK1									WDR12
		LOC100224559						ENDOV								ETNPPL									WRN
		LOC100224677						ENHO								ETV3									WWOX
		LOC100224854						ENO1								ETV7									XRCC6
		LOC100225216						ENO2								EVA1A									YIPF1
		LOC100225337						ENOPH1								EVI5									YIPF3
		LOC100225407						ENTPD4								EVPL									YIPF5
		LOC100225584						ENTPD7								EVX1									YWHAE
		LOC100225594						ENTPD8								EXD3									ZBTB8B
		LOC100225666						EOGT								EXOC3									ZCCHC14
		LOC100225801						EPN2								EXOC8									ZDHHC3
		LOC100225836						EPN3								EXOSC7									ZMYM4
		LOC100226015						EPRS1								EYA2									ZNF148
		LOC100226207						EPS15L1								EYA3									ZNF318
		LOC100226294						EPS8								EYS									ZNF462
		LOC100226446						ERBB4								F8									ZNF511
		LOC100226706						ERC2								FADD									ZNF608
		LOC100226754						ERCC5								FAM102B
		LOC100226888						ERCC6								FAM120B
		LOC100226903						ERG28								FAM131B
		LOC100227325						ERGIC3								FAM133B
		LOC100227477						ERI3								FAM13A
		LOC100227488						ERMP1								FAM13B
		LOC100227651						ESCO1								FAM149B1
		LOC100227654						ESF1								FAM155B
		LOC100227658						ESPN								FAM160B1
		LOC100227698						ESRP2								FAM168A
		LOC100227828						ETFB								FAM168B
		LOC100227878						ETHE1								FAM169B
		LOC100228012						EXD2								FAM171A1
		LOC100228068						EXOC1								FAM171B
		LOC100228139						EXOC3L2								FAM174A
		LOC100228351						EXOC4								FAM174B
		LOC100228379						EXOC6								FAM174C
		LOC100228630						EXOSC1								FAM183A
		LOC100228774						EXOSC2								FAM184A
		LOC100228819						EXOSC5								FAM187A
		LOC100228861						EZH2								FAM207A
		LOC100228968						F11R								FAM214A
		LOC100229133						FAAH								FAM217B
		LOC100229347						FAAH2								FAM219A
		LOC100229407						FAAP100								FAM219B
		LOC100229546						FABP3								FAM234B
		LOC100229572						FAF1								FAM53B
		LOC100229630						FAM104A								FAM78A
		LOC100229855						FAM107B								FAM83B
		LOC100230258						FAM120A								FAM91A1
		LOC100230285						FAM124B								FANCF
		LOC100230293						FAM126A								FANCG
		LOC100230322						FAM136A								FANCL
		LOC100230474						FAM160A2								FAT3
		LOC100230674						FAM161B								FAXC
		LOC100231283						FAM162A								FBXL12
		LOC100231339						FAM171A2								FBXL14
		LOC100231426						FAM181B								FBXL15
		LOC100231622						FAM184B								FBXL20
		LOC100231724						FAM185A								FBXL21P
		LOC100231862						FAM193B								FBXO31
		LOC100232073						FAM237A								FBXO34
		LOC100232309						FAM241A								FBXO48
		LOC100232659						FAM43B								FDXR
		LOC100232689						FAM76A								FEV
		LOC100232745						FAM76B								FGD4
		LOC101232903						FAM83C								FGF2
		LOC101233002						FANCI								FGFR1
		LOC101233072						FARSA								FGFR1OP2
		LOC101233297						FASTK								FGR
		LOC101233446						FAT1								FHDC1
		LOC101233511						FAT4								FIBCD1
		LOC101233554						FBLIM1								FIG4
		LOC101233680						FBN3								FIP1L1
		LOC101234123						FBXL13								FKBP10
		LOC105758559						FBXL16								FKBP4
		LOC105758645						FBXO15								FMN1
		LOC105758723						FBXO25								FMNL2
		LOC105758852						FBXO30								FMNL3
		LOC105758914						FBXO46								FMOD
		LOC105758954						FBXW4								FMR1
		LOC105758985						FBXW9								FNBP1
		LOC105758993						FCHO1								FNDC10
		LOC105759083						FCHSD1								FNDC3A
		LOC105759092						FCHSD2								FNIP2
		LOC105759097						FDPS								FOXI1
		LOC105759117						FEM1B								FOXI3
		LOC105759171						FEM1C								FOXK1
		LOC105759473						FEN1								FOXK2
		LOC105759492						FER1L5								FOXN3
		LOC105759815						FEZ1								FOXN4
		LOC105759937						FEZ2								FOXO4
		LOC105760177						FGD3								FRG1
		LOC105760489						FGF1								FRMD4A
		LOC105760884						FGF14								FRMD7
		LOC105760940						FGG								FRMD8
		LOC105760993						FHL3								FRMPD4
		LOC115490629						FHOD3								FRY
		LOC115490670						FICD								FRZB
		LOC115490677						FKBP11								FSD2
		LOC115490728						FKBP14								FSIP2
		LOC115490737						FKBP3								FUBP3
		LOC115490751						FKBP6								FUCA2
		LOC115490792						FKBP7								FUT11
		LOC115490815						FKBP8								FUT7
		LOC115490860						FKRP								FXYD2
		LOC115490875						FLAD1								FYN
		LOC115490881						FLII								FZD3
		LOC115490948						FLVCR2								FZD8
		LOC115490992						FMC1								FZR1
		LOC115491001						FN1								G2E3
		LOC115491045						FOS								G3BP2
		LOC115491083						FOXF1								GAA
		LOC115491110						FOXL2								GABRA2
		LOC115491120						FOXL3								GABRA4
		LOC115491180						FOXN1								GABRG1
		LOC115491213						FOXN2								GALE
		LOC115491243						FOXQ1								GALNT10
		LOC115491258						FOXRED1								GALNT15
		LOC115491263						FOXRED2								GALNT4
		LOC115491279						FOXS1								GALNT9
		LOC115491304						FPGS								GALR3
		LOC115491354						FRMD3								GALT
		LOC115491683						FSD1								GANC
		LOC115491734						FTH1								GAPVD1
		LOC115491745						FUBP1								GAREM1
		LOC115491799						FUCA1								GARNL3
		LOC115491814						FUNDC2								GARRE1
		LOC115491917						FURIN								GATA3
		LOC115491946						FUT8								GATB
		LOC115492069						FXR1								GBF1
		LOC115492257						FZD9								GCC2
		LOC115492322						G6PC3								GCDH
		LOC115492366						G6PD								GCHFR
		LOC115492401						GAB3								GCN1
		LOC115492412						GABRG3								GDA
		LOC115492438						GADD45A								GDPD2
		LOC115492453						GADD45B								GET1
		LOC115492537						GADD45GIP1								GFPT2
		LOC115492615						GALC								GFRA2
		LOC115492653						GALK1								GGA3
		LOC115492712						GALNS								GGCX
		LOC115492902						GALNT12								GID4
		LOC115492965						GAMT								GINM1
		LOC115492991						GAPDH								GIPC2
		LOC115493072						GARS1								GIT2
		LOC115493092						GAS2L1								GJD2
		LOC115493154						GAS2L3								GK
		LOC115493266						GATD3A								GLB1L
		LOC115493297						GBE1								GLCCI1
		LOC115493334						GBX1								GLCE
		LOC115493338						GCC1								GLG1
		LOC115493362						GCLM								GLIS1
		LOC115493366						GCNA								GLS
		LOC115493374						GCNT4								GLT8D1
		LOC115493382						GDE1								GLTP
		LOC115493397						GDF1								GLUD1
		LOC115493442						GDF15								GMCL1
		LOC115493476						GDI2								GMDS
		LOC115493478						GDPGP1								GMPPA
		LOC115493508						GEMIN4								GNAI2
		LOC115493543						GFI1B								GNAI3
		LOC115493546						GFM1								GNAS
		LOC115493583						GGT1								GNB4
		LOC115493635						GGT7								GNG7
		LOC115493637						GHDC								GNL2
		LOC115493646						GHRH								GNPTAB
		LOC115493670						GHSR								GOLGA3
		LOC115493671						GIPC1								GOLGA5
		LOC115493672						GIT1								GOLGB1
		LOC115493680						GJA4								GOLT1A
		LOC115493696						GLE1								GORAB
		LOC115493697						GLMN								GOSR1
		LOC115493735						GLMP								GOSR2
		LOC115493739						GLRX3								GPATCH2L
		LOC115493740						GLT8D2								GPATCH3
		LOC115493751						GLUL								GPBP1L1
		LOC115493786						GLYR1								GPC1
		LOC115493809						GM2A								GPD2
		LOC115493819						GMEB2								GPHN
		LOC115493825						GMPPB								GPN3
		LOC115493855						GMPS								GPR107
		LOC115493884						GNA13								GPR137C
		LOC115493907						GNAI1								GPR148
		LOC115493920						GNB1L								GPR157
		LOC115493922						GNE								GPR21
		LOC115493923						GNG12								GPR26
		LOC115493939						GNG3								GPR50
		LOC115493973						GNG5								GPR63
		LOC115493981						GNL1								GPS1
		LOC115493984						GNMT								GRB2
		LOC115494014						GNPDA2								GRB7
		LOC115494015						GNRH1								GRIA2
		LOC115494055						GNS								GRIA4
		LOC115494098						GOLGA1								GRIK4
		LOC115494103						GOLGA2								GRIN2A
		LOC115494104						GOLPH3L								GRIN2B
		LOC115494112						GOT1								GRIN2D
		LOC115494115						GOT2								GRIP1
		LOC115494136						GP9								GRK3
		LOC115494245						GPAA1								GRK5
		LOC115494249						GPAT2								GRK7
		LOC115494250						GPAT4								GRM5
		LOC115494307						GPATCH1								GRPEL2
		LOC115494310						GPATCH2								GSC
		LOC115494324						GPD1L								GSC2
		LOC115494346						GPN2								GSPT1
		LOC115494347						GPR12								GSR
		LOC115494354						GPR135								GTDC1
		LOC115494366						GPR139								GTF2A1
		LOC115494367						GPR141								GTF3C1
		LOC115494372						GPR162								GTPBP1
		LOC115494388						GPR171								GTPBP2
		LOC115494396						GPR182								GTPBP4
		LOC115494397						GPR37L1								GTPBP8
		LOC115494401						GPR39								GUCY1B1
		LOC115494415						GPR52								H2AFV
		LOC115494432						GPR61								H3F3A
		LOC115494449						GPR83								H3F3B
		LOC115494487						GPRIN3								HAAO
		LOC115494505						GPX4								HAUS1
		LOC115494515						GPX7								HAUS3
		LOC115494560						GRAMD2A								HAX1
		LOC115494572						GRAP2								HBAP
		LOC115494575						GRB10								HBEGF
		LOC115494610						GRB14								HCN4
		LOC115494682						GRHPR								HDC
		LOC115494752						GRID1								HDDC3
		LOC115494788						GRID2								HDGFL2
		LOC115494860						GRIN1								HDHD5
		LOC115494874						GRINA								HDLBP
		LOC115494885						GRK2								HDX
		LOC115494889						GRK6								HEATR3
		LOC115494928						GRM2								HEATR5B
		LOC115494929						GRM3								HECA
		LOC115494973						GRM4								HECTD1
		LOC115494974						GRN								HECTD3
		LOC115494995						GRPR								HECTD4
		LOC115495004						GSDME								HECW1
		LOC115495011						GSS								HECW2
		LOC115495033						GTF2H1								HEG1
		LOC115495036						GTF2H3								HELLS
		LOC115495044						GTF2I								HENMT1
		LOC115495092						GTF3A								HERC1
		LOC115495107						GTF3C2								HERC2
		LOC115495131						GTF3C4								HERC3
		LOC115495132						GTPBP3								HEXB
		LOC115495134						GUSB								HGFAC
		LOC115495140						GXYLT2								HHATL
		LOC115495185						HABP4								HHEX
		LOC115495199						HACD2								HID1
		LOC115495208						HAGH								HIKESHI
		LOC115495233						HAP1								HIVEP3
		LOC115495236						HAPLN3								HLF
		LOC115495247						HAPLN4								HLX
		LOC115495271						HARS1								HM13
		LOC115495273						HAS3								HMBOX1
		LOC115495299						HAUS8								HMG20A
		LOC115495304						HBP1								HMG20B
		LOC115495332						HCK								HMGA1
		LOC115495351						HCN2								HMGB2
		LOC115495366						HDAC1								HMGB3
		LOC115495391						HDAC3								HMGCL
		LOC115495440						HDAC5								HMGCLL1
		LOC115495463						HDAC7								HMGN2
		LOC115495464						HDAC8								HMGN3
		LOC115495472						HDGF								HMX1
		LOC115495572						HDHD3								HNRNPLL
		LOC115495573						HEATR1								HOMER1
		LOC115495576						HEPACAM								HOMER2
		LOC115495598						HERC4								HOMER3
		LOC115495600						HES4								HOXA3
		LOC115495621						HEXIM1								HOXD4
		LOC115495627						HFM1								HPD
		LOC115495654						HGS								HS6ST3
		LOC115495657						HHLA2								HSD17B12
		LOC115495722						HIF1A								HSF2BP
		LOC115495749						HIGD2A								HSPA14
		LOC115495760						HINFP								HSPB1
		LOC115495777						HINT1								HSPB11
		LOC115495798						HINT2								HSPB2
		LOC115495814						HJURP								HSPB7
		LOC115495837						HJV								HSPD1
		LOC115495845						HLCS								HSPH1
		LOC115495873						HMCES								HTATIP2
		LOC115495895						HMCN1								HTATSF1
		LOC115495920						HMGA2								HTR6
		LOC115495921						HMGB1								HTR7
		LOC115495924						HMGN1								HTT
		LOC115495953						HMOX2								HUNK
		LOC115496023						HNF1B								HUWE1
		LOC115496034						HNF4G								HYI
		LOC115496038						HNRNPA1								HYLS1
		LOC115496041						HNRNPA3								IBTK
		LOC115496055						HNRNPR								ICE1
		LOC115496061						HOGA1								ID4
		LOC115496076						HOOK2								IDE
		LOC115496080						HOXA2								IDH2
		LOC115496083						HOXA5								IDI1
		LOC115496154						HOXC13								IFFO1
		LOC115496168						HPCA								IFIH1
		LOC115496182						HPS1								IFNAR1
		LOC115496204						HPS3								IFNAR2
		LOC115496208						HR								IFNGR2
		LOC115496219						HRG								IFT122
		LOC115496234						HROB								IFT140
		LOC115496240						HSCB								IFT46
		LOC115496243						HSD17B10								IFT81
		LOC115496253						HSD17B2								IGF1
		LOC115496268						HSD17B3								IGF2R
		LOC115496314						HSD3B7								IGFBP7
		LOC115496340						HSF2								IGSF9B
		LOC115496360						HSP90AA1								IKBKE
		LOC115496366						HSPA13								IKZF5
		LOC115496373						HSPB3								IL10RB
		LOC115496380						HSPBAP1								IL11RA
		LOC115496402						HTRA2								IL1RAPL2
		LOC115496408						HUS1								IL21
		LOC115496422						HYPK								IL4R
		LOC115496432						IBA57								ILDR2
		LOC115496441						ICAM5								ILK
		LOC115496462						ICE2								ILRUN
		LOC115496482						ID1								INAVA
		LOC115496649						ID3								INPP4A
		LOC115496651						IDH1								INPP5B
		LOC115496654						IDH3B								INPP5F
		LOC115496655						IDUA								INSYN2B
		LOC115496658						IER5								INTS1
		LOC115496665						IER5L								INTS13
		LOC115496666						IFRD2								INTS8
		LOC115496716						IFT20								IP6K3
		LOC115496728						IFT57								IPMK
		LOC115496764						IGBP1								IPO8
		LOC115496783						IGDCC3								IPPK
		LOC115496799						IGFBP3								IQCB1
		LOC115496801						IGSF21								IRAK2
		LOC115496812						IK								IREB2
		LOC115496813						IKBKG								IRF2BP2
		LOC115496819						IL13RA1								IRF5
		LOC115496829						IL18								IRF6
		LOC115496859						IL23A								IRS4
		LOC115496886						IL6R								IRX5
		LOC115496890						IL7								IST1
		LOC115496894						ILDR1								ITGA2B
		LOC115496975						ILF2								ITGB3BP
		LOC115496977						IMMT								ITIH4
		LOC115496981						IMP4								ITM2A
		LOC115496997						IMPDH2								ITPK1
		LOC115497050						IMPG2								ITPKA
		LOC115497064						INAFM2								ITPR1
		LOC115497090						INF2								ITPRIP
		LOC115497097						ING4								ITSN1
		LOC115497112						INKA1								ITSN2
		LOC115497116						INO80								JADE3
		LOC115497122						INO80C								JAKMIP2
		LOC115497128						INO80D								JAKMIP3
		LOC115497134						INPP5K								JAM2
		LOC115497161						INTS11								JAZF1
		LOC115497176						INTS3								JCAD
		LOC115497202						INTS5								JMJD1C
		LOC115497203						INTS7								JMJD4
		LOC115497212						IP6K1								JMJD6
		LOC115497224						IPO5								KANK4
		LOC115497228						IPO7								KAT14
		LOC115497271						IQCE								KAT6A
		LOC115497329						IQSEC1								KAT8
		LOC115497394						IQUB								KATNA1
		LOC115497399						ISG20L2								KBTBD11
		LOC115497402						ISYNA1								KCNA3
		LOC115497433						ITCH								KCNB1
		LOC115497579						ITGA10								KCNC1
		LOC115497585						ITGA3								KCNC4
		LOC115497652						ITGA6								KCNG1
		LOC115497737						ITGA8								KCNH4
		LOC115497751						ITGB8								KCNQ2
		LOC115497766						ITPA								KCNQ3
		LOC115497782						ITPR2								KCTD1
		LOC115497791						ITPRIPL2								KCTD10
		LOC115497800						IWS1								KCTD12
		LOC115497804						JAG2								KCTD21
		LOC115497825						JAGN1								KCTD3
		LOC115497842						JAK2								KCTD7
		LOC115497877						JAKMIP1								KCTD8
		LOC115497879						JARID2								KDM1A
		LOC115497897						JKAMP								KDM2B
		LOC115497903						JMJD8								KDM3A
		LOC115497927						JOSD2								KDM3B
		LOC115497952						JPH1								KDM4A
		LOC115497956						JPT2								KDM5B
		LOC115497970						JUND								KIAA0825
		LOC115498048						KALRN								KIAA0895
		LOC115498114						KANK1								KIAA1109
		LOC115498205						KANSL2								KIAA1549
		LOC115498235						KANSL3								KIAA1549L
		LOC115498297						KAT2B								KIAA1614
		LOC115498317						KAT5								KIAA1755
		LOC115498318						KAT7								KIAA2013
		LOC115498346						KATNAL1								KIDINS220
		LOC115498444						KATNBL1								KIF1B
		LOC115498585						KCNA1								KIF21B
		LOC116806596						KCNAB1								KIF26A
		LOC116806627						KCNAB2								KIF2A
		LOC116806660						KCNB2								KIF3B
		LOC116806729						KCND2								KIFAP3
		LOC116806734						KCNG2								KLF2
		LOC116806735						KCNIP2								KLHDC1
		LOC116806741						KCNJ1								KLHL11
		LOC116806748						KCNJ10								KLHL17
		LOC116806774						KCNJ4								KLHL2
		LOC116806799						KCNK15								KLHL29
		LOC116806804						KCNK18								KMO
		LOC116806806						KCNN2								KMT2A
		LOC116806808						KCTD17								KMT2C
		LOC116806817						KDM1B								KPNA2
		LOC116806820						KDM2A								KPNA3
		LOC116806828						KDM5A								KPNA5
		LOC116806829						KEAP1								KPNB1
		LOC116806855						KHSRP								KRIT1
		LOC116806935						KIAA0513								KYNU
		LOC116807026						KIAA0895L								L3MBTL1
		LOC116807031						KIAA1328								L3MBTL2
		LOC116807051						KIF13B								LACTB
		LOC116807081						KIF14								LAMB1
		LOC116807083						KIF16B								LAMB3
		LOC116807096						KIF20B								LAMP5
		LOC116807129						KIF23								LAMTOR3
		LOC116807156						KIF3A								LANCL1
		LOC116807171						KIF4A								LARP1B
		LOC116807213						KIF6								LARP6
		LOC116807219						KIFC3								LARP7
		LOC116807228						KITLG								LCOR
		LOC116807259						KLC4								LDB2
		LOC116807289						KLF13								LEAP2
		LOC116807383						KLF7								LEF1
		LOC116807414						KLF8								LGSN
		LOC116807425						KLF9								LHX4
		LOC116807444						KLHDC10								LIFR
		LOC116807469						KLHDC2								LIMA1
		LOC116807476						KLHDC3								LIMCH1
		LOC116807526						KLHDC8B								LIMD2
		LOC116807541						KLHL12								LIN28B
		LOC116807564						KLHL20								LIN9
		LOC116807632						KLHL24								LINGO2
		LOC116807649						KLHL26								LIPT1
		LOC116807699						KLHL28								LITAF
		LOC116807703						KLHL33								LMBR1
		LOC116807731						KLHL42								LMCD1
		LOC116807774						KNTC1								LMLN
		LOC116807777						KPNA1								LMO3
		LOC116807779						KPNA7								LMO7
		LOC116807784						KRI1								LMTK2
		LOC116807792						KRTCAP3								LNPEP
		LOC116807793						KTN1								LNX2
		LOC116807803						KXD1								LOC100144431
		LOC116807817						KYAT3								LOC100190137
		LOC116807834						L2HGDH								LOC100190204
		LOC116807854						L3MBTL3								LOC100190249
		LOC116807858						LAMTOR1								LOC100190336
		LOC116807860						LAMTOR2								LOC100190340
		LOC116807865						LAMTOR4								LOC100190436
		LOC116807866						LAMTOR5								LOC100190538
		LOC116807879						LANCL3								LOC100217613
		LOC116807898						LAP3								LOC100217899
		LOC116807908						LARP4								LOC100217943
		LOC116807909						LARP4B								LOC100218088
		LOC116808020						LASP1								LOC100218133
		LOC116808034						LATS1								LOC100218246
		LOC116808040						LAYN								LOC100218400
		LOC116808074						LBH								LOC100218804
		LOC116808100						LDLR								LOC100218816
		LOC116808112						LDLRAD1								LOC100219145
		LOC116808144						LEMD3								LOC100219720
		LOC116808148						LETM2								LOC100219761
		LOC116808155						LFNG								LOC100219814
		LOC116808162						LGI3								LOC100219837
		LOC116808177						LHFPL4								LOC100220117
		LOC116808185						LHFPL5								LOC100220385
		LOC116808200						LIG4								LOC100220399
		LOC116808205						LIMK1								LOC100220557
		LOC116808208						LIMS1								LOC100220663
		LOC116808223						LIN54								LOC100220690
		LOC116808229						LIPT2								LOC100220716
		LOC116808262						LLGL1								LOC100220722
		LOC116808415						LMAN2								LOC100220853
		LOC116808422						LMAN2L								LOC100221041
		LOC116808425						LMF1								LOC100221185
		LOC116808433						LMF2								LOC100221492
		LOC116808447						LMNB2								LOC100221700
		LOC116808457						LOC100189947								LOC100221738
		LOC116808469						LOC100189956								LOC100221794
		LOC116808475						LOC100189978								LOC100221841
		LOC116808484						LOC100190001								LOC100221871
		LOC116808495						LOC100190026								LOC100221885
		LOC116808496						LOC100190094								LOC100221905
		LOC116808503						LOC100190143								LOC100221949
		LOC116808504						LOC100190229								LOC100221986
		LOC116808513						LOC100190325								LOC100222067
		LOC116808514						LOC100190429								LOC100222099
		LOC116808525						LOC100190507								LOC100222119
		LOC116808527						LOC100190573								LOC100222166
		LOC116808535						LOC100190722								LOC100222291
		LOC116808542						LOC100190731								LOC100222370
		LOC116808546						LOC100217780								LOC100222462
		LOC116808551						LOC100217844								LOC100222525
		LOC116808574						LOC100217858								LOC100222565
		LOC116808597						LOC100217864								LOC100222682
		LOC116808614						LOC100217866								LOC100222702
		LOC116808619						LOC100217869								LOC100222960
		LOC116808644						LOC100217895								LOC100223004
		LOC116808645						LOC100217958								LOC100223021
		LOC116808649						LOC100218233								LOC100223254
		LOC116808652						LOC100218507								LOC100223260
		LOC116808655						LOC100218528								LOC100223531
		LOC116808666						LOC100218564								LOC100223619
		LOC116808679						LOC100218573								LOC100223651
		LOC116808680						LOC100218598								LOC100223676
		LOC116808683						LOC100218635								LOC100223798
		LOC116808725						LOC100218691								LOC100223824
		LOC116808789						LOC100218725								LOC100224071
		LOC116808795						LOC100218765								LOC100224152
		LOC116808820						LOC100218844								LOC100224218
		LOC116808845						LOC100218845								LOC100224284
		LOC116808847						LOC100218864								LOC100224313
		LOC116808848						LOC100218923								LOC100224416
		LOC116808854						LOC100219101								LOC100224497
		LOC116808861						LOC100219141								LOC100224543
		LOC116808870						LOC100219254								LOC100224564
		LOC116808889						LOC100219283								LOC100224784
		LOC116808901						LOC100219445								LOC100224867
		LOC116808927						LOC100219450								LOC100225136
		LOC116808944						LOC100219485								LOC100225224
		LOC116808955						LOC100219532								LOC100225248
		LOC116808966						LOC100219596								LOC100225355
		LOC116808967						LOC100219794								LOC100225458
		LOC116808969						LOC100219858								LOC100225462
		LOC116808970						LOC100219950								LOC100225592
		LOC116808972						LOC100219971								LOC100225627
		LOC116808982						LOC100220042								LOC100225683
		LOC116808990						LOC100220064								LOC100225858
		LOC116809014						LOC100220107								LOC100225865
		LOC116809017						LOC100220381								LOC100225866
		LOC116809026						LOC100220416								LOC100225999
		LOC116809027						LOC100220698								LOC100226104
		LOC116809033						LOC100220775								LOC100226342
		LOC116809035						LOC100220779								LOC100226503
		LOC116809047						LOC100220872								LOC100226571
		LOC116809074						LOC100221285								LOC100226727
		LOC116809091						LOC100221377								LOC100226815
		LOC116809124						LOC100221461								LOC100226900
		LOC116809162						LOC100221615								LOC100226913
		LOC116809178						LOC100221679								LOC100227038
		LOC116809187						LOC100221708								LOC100227392
		LOC116809198						LOC100221727								LOC100227468
		LOC116809202						LOC100221733								LOC100227542
		LOC116809210						LOC100221763								LOC100227800
		LOC116809229						LOC100221862								LOC100227890
		LOC116809266						LOC100221863								LOC100228027
		LOC116809293						LOC100221933								LOC100228280
		LPAR4						LOC100221958								LOC100228420
		LPGAT1						LOC100221999								LOC100228959
		LRP5						LOC100222002								LOC100229162
		LRRC1						LOC100222111								LOC100229180
		LRRC2						LOC100222268								LOC100229266
		LRRC40						LOC100222286								LOC100229272
		LRRC47						LOC100222418								LOC100229420
		LRRC49						LOC100222731								LOC100229438
		LRRC4C						LOC100223114								LOC100229443
		LRRC59						LOC100223270								LOC100229618
		LRRN4						LOC100223335								LOC100229648
		LRRTM4						LOC100223458								LOC100229692
		LRSAM1						LOC100223640								LOC100229766
		LSAMP						LOC100223646								LOC100229817
		LSG1						LOC100223684								LOC100230194
		LY75						LOC100223864								LOC100230245
		LYPD1						LOC100224009								LOC100230278
		MAD2L1						LOC100224067								LOC100230413
		MAEA						LOC100224150								LOC100230541
		MAFG						LOC100224272								LOC100230549
		MAFK						LOC100224290								LOC100230755
		MAGT1						LOC100224318								LOC100230859
		MALRD1						LOC100224401								LOC100230872
		MAML3						LOC100224554								LOC100230937
		MAN2A1						LOC100224616								LOC100231110
		MAN2B2						LOC100224667								LOC100231131
		MAN2C1						LOC100224709								LOC100231233
		MAP3K15						LOC100224823								LOC100231284
		MAP3K20						LOC100225005								LOC100231303
		MAP3K5						LOC100225060								LOC100231371
		MAP6						LOC100225145								LOC100231450
		MAPK11						LOC100225312								LOC100231557
		MAPK15						LOC100225322								LOC100231572
		MAPKAPK2						LOC100225408								LOC100231595
		MARCO						LOC100225533								LOC100231656
		MASP1						LOC100225609								LOC100231669
		MATK						LOC100225782								LOC100231670
		MATN4						LOC100225871								LOC100231840
		MB21D2						LOC100225878								LOC100232025
		MCTP2						LOC100225980								LOC100232037
		MCU						LOC100226089								LOC100232087
		MCUB						LOC100226145								LOC100232391
		MED30						LOC100226165								LOC100232392
		MEGF11						LOC100226208								LOC100232594
		MEGF6						LOC100226230								LOC100232623
		MEI4						LOC100226305								LOC100232794
		MEIOB						LOC100226365								LOC101232953
		MEIS1						LOC100226496								LOC101233155
		MELK						LOC100226551								LOC101233247
		METTL14						LOC100226555								LOC101233387
		MEX3A						LOC100226756								LOC101233588
		MFN1						LOC100226809								LOC101233590
		MGAT4C						LOC100226843								LOC101233610
		MGLL						LOC100226970								LOC101233664
		MID1						LOC100227010								LOC101233796
		MIER2						LOC100227202								LOC101233849
		MIR2989-2						LOC100227445								LOC101233937
		MKNK1						LOC100227464								LOC101234090
		MLANA						LOC100227533								LOC105758485
		MLLT11						LOC100227575								LOC105758514
		MMACHC						LOC100227578								LOC105758587
		MMD						LOC100227609								LOC105758588
		MMD2						LOC100227652								LOC105758667
		MME						LOC100227695								LOC105758737
		MMP11						LOC100227710								LOC105758756
		MMP23B						LOC100227764								LOC105758783
		MMP28						LOC100227781								LOC105758793
		MMP9						LOC100227823								LOC105758838
		MMRN2						LOC100228000								LOC105758956
		MPP7						LOC100228103								LOC105759069
		MPPED1						LOC100228347								LOC105759153
		MPPED2						LOC100228369								LOC105759175
		MPZ						LOC100228395								LOC105759204
		MRPL15						LOC100228474								LOC105759265
		MRPL45						LOC100228485								LOC105759267
		MRPL53						LOC100228496								LOC105759327
		MSANTD1						LOC100228594								LOC105759356
		MSANTD4						LOC100228631								LOC105759524
		MSI2						LOC100228780								LOC105759762
		MSMO1						LOC100228856								LOC105759774
		MSRB1						LOC100228958								LOC105760005
		MSRB3						LOC100228990								LOC105760079
		MSTN						LOC100229020								LOC105760185
		MTERF2						LOC100229249								LOC105760408
		MTFR1						LOC100229366								LOC105760690
		MTHFD1						LOC100229402								LOC105760701
		MTMR11						LOC100229557								LOC105760756
		MTNR1A						LOC100229710								LOC105760944
		MXD4						LOC100229734								LOC105760973
		MYBPH						LOC100229769								LOC105760990
		MYCN						LOC100229852								LOC115490557
		MYF6						LOC100229864								LOC115490584
		MYH11						LOC100229898								LOC115490606
		MYL10						LOC100230122								LOC115490620
		MYL2						LOC100230284								LOC115490633
		MYO10						LOC100230587								LOC115490650
		MYO15A						LOC100230856								LOC115490697
		MYO1A						LOC100230890								LOC115490698
		MYO3A						LOC100231047								LOC115490733
		MYO5B						LOC100231060								LOC115490752
		MYOCD						LOC100231148								LOC115490769
		MYOM2						LOC100231234								LOC115490773
		MYZAP						LOC100231322								LOC115490831
		NAA30						LOC100231564								LOC115490866
		NABP1						LOC100231678								LOC115490885
		NADSYN1						LOC100231893								LOC115490904
		NAF1						LOC100231911								LOC115490950
		NAPEPLD						LOC100232129								LOC115490952
		NAXD						LOC100232212								LOC115490980
		NCBP3						LOC100232219								LOC115490987
		NCKAP5						LOC100232247								LOC115491007
		NCOR2						LOC100232263								LOC115491008
		NDE1						LOC100232337								LOC115491018
		NDEL1						LOC100232364								LOC115491025
		NDFIP2						LOC100232395								LOC115491028
		NDNF						LOC100232471								LOC115491037
		NDST1						LOC100232483								LOC115491050
		NDST4						LOC101232941								LOC115491064
		NEIL2						LOC101233001								LOC115491065
		NEO1						LOC101233006								LOC115491066
		NEU2						LOC101233028								LOC115491068
		NEURL1						LOC101233052								LOC115491094
		NEUROD6						LOC101233280								LOC115491124
		NEXN						LOC101233334								LOC115491133
		NFATC1						LOC101233398								LOC115491139
		NFIB						LOC101233484								LOC115491142
		NFKB2						LOC101233507								LOC115491214
		NFKBIZ						LOC101233572								LOC115491282
		NHSL1						LOC101233669								LOC115491297
		NHSL2						LOC101233672								LOC115491348
		NIM1K						LOC101233818								LOC115491367
		NIPAL1						LOC101233925								LOC115491449
		NKAIN3						LOC101233949								LOC115491506
		NKX2-1						LOC101233957								LOC115491548
		NKX6-1						LOC101234170								LOC115491583
		NKX6-3						LOC101234180								LOC115491597
		NMB						LOC101234182								LOC115491623
		NMBR						LOC101234234								LOC115491692
		NMRK2						LOC101234248								LOC115491911
		NMU						LOC101234259								LOC115492013
		NOL4L						LOC105758686								LOC115492053
		NOS1AP						LOC105758698								LOC115492204
		NOTCH1						LOC105758767								LOC115492402
		NOXA1						LOC105758775								LOC115492525
		NOXO1						LOC105758912								LOC115492594
		NPFFR1						LOC105759064								LOC115492610
		NPNT						LOC105759119								LOC115492698
		NPPC						LOC105759121								LOC115492776
		NPR2						LOC105759159								LOC115492817
		NPTX1						LOC105759165								LOC115492886
		NPTX2						LOC105759169								LOC115492926
		NPTXR						LOC105759170								LOC115492999
		NPY4R2						LOC105759208								LOC115493074
		NR0B1						LOC105759242								LOC115493085
		NR1D2						LOC105759260								LOC115493097
		NR2E1						LOC105759301								LOC115493104
		NR4A2						LOC105759518								LOC115493149
		NR4A3						LOC105759685								LOC115493161
		NR6A1						LOC105760106								LOC115493173
		NRXN3						LOC105760147								LOC115493254
		NSL1						LOC105760210								LOC115493346
		NSUN4						LOC105760330								LOC115493351
		NT5C1A						LOC105760369								LOC115493353
		NTNG1						LOC105760490								LOC115493356
		NTPCR						LOC105760697								LOC115493363
		NTSR1						LOC105760726								LOC115493372
		NUB1						LOC105760861								LOC115493373
		NUDT13						LOC105760863								LOC115493377
		NUDT3						LOC105760997								LOC115493395
		NUP188						LOC115490530								LOC115493396
		NUP35						LOC115490593								LOC115493416
		NUP43						LOC115490595								LOC115493418
		NUP54						LOC115490628								LOC115493435
		NUP93						LOC115490631								LOC115493436
		NXNL2						LOC115490693								LOC115493477
		NXPH4						LOC115490725								LOC115493503
		OBSL1						LOC115490750								LOC115493504
		OGFR						LOC115490759								LOC115493506
		OLFM3						LOC115490768								LOC115493529
		OMA1						LOC115490770								LOC115493552
		ONECUT1						LOC115490834								LOC115493554
		OPHN1						LOC115490836								LOC115493560
		OPRD1						LOC115490839								LOC115493566
		OPRL1						LOC115490840								LOC115493618
		OPRM1						LOC115490855								LOC115493627
		OPTN						LOC115490872								LOC115493631
		OSBPL10						LOC115490876								LOC115493667
		OSBPL1A						LOC115490877								LOC115493686
		OSBPL9						LOC115490883								LOC115493762
		OSTN						LOC115490899								LOC115493763
		OTOG						LOC115490931								LOC115493775
		OTOP1						LOC115490936								LOC115493785
		OTOR						LOC115490946								LOC115493794
		OTP						LOC115490963								LOC115493816
		OTULINL						LOC115490971								LOC115493838
		OXSR1						LOC115490972								LOC115493842
		P4HA1						LOC115490984								LOC115493843
		P4HA2						LOC115491017								LOC115493848
		PACRG						LOC115491029								LOC115493872
		PAFAH1B2						LOC115491032								LOC115493878
		PAK5						LOC115491041								LOC115493883
		PAM						LOC115491052								LOC115493889
		PANX2						LOC115491073								LOC115493899
		PAPPA						LOC115491092								LOC115493904
		PAPSS1						LOC115491109								LOC115493958
		PAPSS2						LOC115491113								LOC115493974
		PARD3B						LOC115491115								LOC115494002
		PARPBP						LOC115491122								LOC115494005
		PARVG						LOC115491128								LOC115494012
		PASK						LOC115491129								LOC115494042
		PATJ						LOC115491135								LOC115494059
		PAX2						LOC115491136								LOC115494085
		PAX3						LOC115491140								LOC115494093
		PCCB						LOC115491141								LOC115494108
		PCDH1						LOC115491145								LOC115494116
		PCDH10						LOC115491155								LOC115494142
		PCDH20						LOC115491195								LOC115494154
		PCGF6						LOC115491197								LOC115494274
		PCMTD1						LOC115491205								LOC115494285
		PCP4						LOC115491209								LOC115494288
		PCTP						LOC115491278								LOC115494301
		PCYT1A						LOC115491284								LOC115494302
		PDCD4						LOC115491288								LOC115494311
		PDCL						LOC115491289								LOC115494331
		PDE10A						LOC115491305								LOC115494337
		PDE2A						LOC115491394								LOC115494360
		PDE3B						LOC115491410								LOC115494394
		PDE7B						LOC115491471								LOC115494405
		PDGFA						LOC115491475								LOC115494473
		PDGFB						LOC115491505								LOC115494480
		PDIA5						LOC115491507								LOC115494507
		PDYN						LOC115491573								LOC115494524
		PDZRN3						LOC115491599								LOC115494550
		PECAM1						LOC115491620								LOC115494559
		PELI1						LOC115491631								LOC115494611
		PENK						LOC115491650								LOC115494617
		PERM1						LOC115491654								LOC115494645
		PEX5L						LOC115491655								LOC115494662
		PFKFB2						LOC115491676								LOC115494725
		PGAP6						LOC115491712								LOC115494726
		PGPEP1						LOC115491714								LOC115494735
		PGPEP1L						LOC115491738								LOC115494755
		PHF13						LOC115491783								LOC115494782
		PHYHIPL						LOC115491788								LOC115494797
		PIEZO2						LOC115491841								LOC115494834
		PIGB						LOC115491851								LOC115494861
		PIGQ						LOC115491915								LOC115494883
		PIGR						LOC115491932								LOC115494899
		PIM3						LOC115491957								LOC115494921
		PIP4K2A						LOC115491977								LOC115494925
		PIP4P2						LOC115492049								LOC115494966
		PITPNA						LOC115492054								LOC115494968
		PLCB2						LOC115492083								LOC115494998
		PLCD4						LOC115492129								LOC115495041
		PLCG1						LOC115492169								LOC115495058
		PLCG2						LOC115492298								LOC115495086
		PLCH2						LOC115492308								LOC115495109
		PLD1						LOC115492331								LOC115495119
		PLEKHB2						LOC115492377								LOC115495121
		PLEKHD1						LOC115492386								LOC115495135
		PLEKHO2						LOC115492409								LOC115495139
		PLEKHS1						LOC115492410								LOC115495184
		PLK3						LOC115492417								LOC115495191
		PLPP2						LOC115492427								LOC115495215
		PLSCR5						LOC115492509								LOC115495216
		PLXDC1						LOC115492515								LOC115495219
		PLXND1						LOC115492536								LOC115495223
		PMAIP1						LOC115492552								LOC115495241
		PMEPA1						LOC115492592								LOC115495244
		PMM2						LOC115492608								LOC115495246
		PMPCB						LOC115492685								LOC115495258
		PNKP						LOC115492695								LOC115495268
		PNRC2						LOC115492733								LOC115495277
		PODN						LOC115492854								LOC115495313
		PODXL						LOC115492923								LOC115495364
		PODXL2						LOC115492946								LOC115495371
		POLD3						LOC115492979								LOC115495456
		POMGNT1						LOC115492993								LOC115495476
		POU3F2						LOC115493088								LOC115495510
		PPARG						LOC115493090								LOC115495586
		PPARGC1A						LOC115493093								LOC115495597
		PPEF1						LOC115493103								LOC115495623
		PPM1J						LOC115493109								LOC115495637
		PPP1CC						LOC115493121								LOC115495663
		PPP1R27						LOC115493143								LOC115495671
		PRDM13						LOC115493148								LOC115495688
		PRG4						LOC115493162								LOC115495690
		PRICKLE1						LOC115493180								LOC115495693
		PRICKLE2						LOC115493185								LOC115495699
		PRIMA1						LOC115493202								LOC115495746
		PRKAA2						LOC115493205								LOC115495781
		PRKAG2						LOC115493267								LOC115495822
		PRKCD						LOC115493348								LOC115495827
		PRLHR						LOC115493390								LOC115495851
		PRMT9						LOC115493419								LOC115495858
		PROK2						LOC115493447								LOC115495870
		PRPH						LOC115493448								LOC115495892
		PRPS1						LOC115493460								LOC115495894
		PRPS2						LOC115493462								LOC115495901
		PRSS12						LOC115493464								LOC115495918
		PRUNE2						LOC115493474								LOC115495950
		PSD						LOC115493479								LOC115495960
		PSD2						LOC115493509								LOC115495963
		PSMD5						LOC115493518								LOC115495978
		PTER						LOC115493522								LOC115495980
		PTGS1						LOC115493532								LOC115496012
		PTP4A3						LOC115493544								LOC115496032
		PTPN1						LOC115493568								LOC115496035
		PTPRA						LOC115493573								LOC115496044
		PTPRD						LOC115493595								LOC115496053
		PTPRE						LOC115493612								LOC115496065
		PTPRF						LOC115493614								LOC115496092
		PTPRN						LOC115493615								LOC115496126
		PTPRR						LOC115493621								LOC115496160
		PTPRS						LOC115493632								LOC115496170
		PTPRU						LOC115493638								LOC115496171
		PTPRZ1						LOC115493644								LOC115496186
		PWWP3A						LOC115493649								LOC115496212
		RAB20						LOC115493684								LOC115496213
		RAB3IP						LOC115493727								LOC115496230
		RAB6A						LOC115493746								LOC115496237
		RAB9B						LOC115493806								LOC115496258
		RAD21L1						LOC115493811								LOC115496267
		RAD54L						LOC115493818								LOC115496271
		RALY						LOC115493829								LOC115496272
		RALYL						LOC115493850								LOC115496279
		RANBP3L						LOC115493873								LOC115496285
		RAP1GAP2						LOC115493918								LOC115496286
		RAP1GDS1						LOC115493932								LOC115496315
		RASAL1						LOC115493945								LOC115496319
		RASGRP1						LOC115493953								LOC115496343
		RASL10B						LOC115493979								LOC115496345
		RASL11A						LOC115494021								LOC115496354
		RASL11B						LOC115494071								LOC115496367
		RASSF10						LOC115494075								LOC115496372
		RASSF6						LOC115494089								LOC115496376
		RBM19						LOC115494092								LOC115496377
		RBM20						LOC115494106								LOC115496391
		RBM38						LOC115494110								LOC115496397
		RBP4						LOC115494158								LOC115496411
		RBPJL						LOC115494265								LOC115496429
		RCAN1						LOC115494269								LOC115496453
		RCAN3						LOC115494270								LOC115496479
		RCC1L						LOC115494291								LOC115496557
		RD3L						LOC115494304								LOC115496561
		RDH8						LOC115494327								LOC115496622
		RELT						LOC115494377								LOC115496624
		RETSAT						LOC115494412								LOC115496627
		RFC2						LOC115494430								LOC115496631
		RFTN1						LOC115494438								LOC115496711
		RGL1						LOC115494446								LOC115496735
		RGS10						LOC115494456								LOC115496737
		RGS11						LOC115494463								LOC115496755
		RGS12						LOC115494498								LOC115496779
		RGS16						LOC115494518								LOC115496795
		RGS4						LOC115494519								LOC115496832
		RGS5						LOC115494536								LOC115496857
		RGS6						LOC115494538								LOC115496873
		RGS9						LOC115494540								LOC115496891
		RHOBTB1						LOC115494570								LOC115496893
		RHOC						LOC115494608								LOC115496916
		RHOT1						LOC115494622								LOC115496918
		RHOV						LOC115494655								LOC115496919
		RIOK2						LOC115494705								LOC115496933
		RIPK4						LOC115494720								LOC115496956
		RIT1						LOC115494722								LOC115496960
		RIT2						LOC115494737								LOC115496972
		RND3						LOC115494811								LOC115496983
		RNF11						LOC115494824								LOC115497003
		RNF13						LOC115494830								LOC115497007
		RNF144B						LOC115494837								LOC115497072
		RNF146						LOC115494850								LOC115497073
		RNF157						LOC115494865								LOC115497100
		RNF20						LOC115494882								LOC115497102
		RNF207						LOC115494886								LOC115497121
		RNF223						LOC115494887								LOC115497130
		ROBO1						LOC115494913								LOC115497141
		ROR1						LOC115494933								LOC115497177
		RORA						LOC115494942								LOC115497181
		RORB						LOC115494956								LOC115497204
		ROS1						LOC115494991								LOC115497213
		RPA2						LOC115495002								LOC115497227
		RPH3A						LOC115495037								LOC115497240
		RPRD1B						LOC115495040								LOC115497246
		RRAD						LOC115495047								LOC115497272
		RS1						LOC115495048								LOC115497274
		RSPO3						LOC115495056								LOC115497277
		RSU1						LOC115495057								LOC115497302
		RTCA						LOC115495077								LOC115497327
		RTN4RL1						LOC115495081								LOC115497336
		S1PR3						LOC115495110								LOC115497352
		SAMD11						LOC115495127								LOC115497358
		SAMD13						LOC115495189								LOC115497375
		SAMHD1						LOC115495195								LOC115497377
		SAP30L						LOC115495225								LOC115497378
		SATB1						LOC115495235								LOC115497401
		SATB2						LOC115495255								LOC115497415
		SCD5						LOC115495261								LOC115497439
		SCG2						LOC115495291								LOC115497442
		SCMH1						LOC115495293								LOC115497558
		SCNN1G						LOC115495294								LOC115497561
		SCYL3						LOC115495340								LOC115497564
		SDC1						LOC115495373								LOC115497592
		SDCCAG8						LOC115495389								LOC115497596
		SDF2L1						LOC115495400								LOC115497621
		SDHA						LOC115495453								LOC115497622
		SEC22A						LOC115495462								LOC115497647
		SEC24D						LOC115495471								LOC115497681
		SELENOF						LOC115495473								LOC115497695
		SEMA3D						LOC115495485								LOC115497718
		SEMA5A						LOC115495500								LOC115497747
		SENP2						LOC115495526								LOC115497779
		SEPTIN5						LOC115495539								LOC115497787
		SEPTIN6						LOC115495560								LOC115497828
		SERPINB12						LOC115495563								LOC115497838
		SERPINB5						LOC115495574								LOC115497857
		SERPINE3						LOC115495583								LOC115497868
		SERTM2						LOC115495603								LOC115497886
		SFTPC						LOC115495633								LOC115497913
		SGCE						LOC115495646								LOC115497934
		SGK3						LOC115495672								LOC115497968
		SH2D1B						LOC115495695								LOC115497969
		SH3BGR						LOC115495716								LOC115497979
		SH3BP1						LOC115495720								LOC115498003
		SH3GLB2						LOC115495756								LOC115498030
		SH3RF2						LOC115495773								LOC115498050
		SHC4						LOC115495794								LOC115498080
		SHISA2						LOC115495796								LOC115498090
		SHISA5						LOC115495804								LOC115498111
		SHISAL2A						LOC115495821								LOC115498147
		SIAH3						LOC115495859								LOC115498177
		SIDT1						LOC115495868								LOC115498198
		SIM1						LOC115495869								LOC115498224
		SIMC1						LOC115495897								LOC115498232
		SIX3						LOC115495917								LOC115498250
		SKAP1						LOC115495928								LOC115498253
		SKOR1						LOC115495938								LOC115498261
		SLC10A4						LOC115495947								LOC115498264
		SLC10A7						LOC115495949								LOC115498270
		SLC12A2						LOC115495958								LOC115498278
		SLC16A3						LOC115495995								LOC115498294
		SLC16A7						LOC115496002								LOC115498302
		SLC18A2						LOC115496006								LOC115498304
		SLC18A3						LOC115496025								LOC115498343
		SLC24A2						LOC115496062								LOC115498354
		SLC25A47						LOC115496087								LOC115498361
		SLC25A6						LOC115496122								LOC115498447
		SLC2A1						LOC115496136								LOC115498449
		SLC30A2						LOC115496151								LOC115498484
		SLC32A1						LOC115496157								LOC115498501
		SLC35A1						LOC115496162								LOC115498509
		SLC35B4						LOC115496173								LOC115498512
		SLC35C2						LOC115496199								LOC115498535
		SLC35D3						LOC115496201								LOC115498551
		SLC35F4						LOC115496207								LOC115498553
		SLC35G2						LOC115496210								LOC115498555
		SLC37A4						LOC115496214								LOC115498566
		SLC38A11						LOC115496223								LOC116806599
		SLC38A3						LOC115496224								LOC116806625
		SLC41A2						LOC115496229								LOC116806639
		SLC4A3						LOC115496241								LOC116806648
		SLC5A7						LOC115496242								LOC116806679
		SLC66A3						LOC115496246								LOC116806703
		SLC6A5						LOC115496254								LOC116806723
		SLC6A7						LOC115496255								LOC116806731
		SLC7A2						LOC115496274								LOC116806732
		SLC8A1						LOC115496292								LOC116806739
		SLCO4A1						LOC115496308								LOC116806767
		SLCO5A1						LOC115496326								LOC116806793
		SLIT1						LOC115496348								LOC116806794
		SLIT3						LOC115496349								LOC116806816
		SLITRK1						LOC115496350								LOC116806822
		SLITRK2						LOC115496355								LOC116806836
		SMCO4						LOC115496384								LOC116806849
		SMPDL3B						LOC115496385								LOC116806900
		SMTNL2						LOC115496398								LOC116806908
		SMYD2						LOC115496413								LOC116806947
		SMYD5						LOC115496461								LOC116806948
		SNAPC5						LOC115496467								LOC116807016
		SNW1						LOC115496469								LOC116807017
		SNX7						LOC115496484								LOC116807025
		SOX12						LOC115496554								LOC116807042
		SP6						LOC115496555								LOC116807044
		SP8						LOC115496573								LOC116807056
		SPATA16						LOC115496580								LOC116807080
		SPATA5						LOC115496588								LOC116807124
		SPATA6						LOC115496608								LOC116807218
		SPCS3						LOC115496650								LOC116807237
		SPINK2						LOC115496656								LOC116807238
		SPOCK1						LOC115496706								LOC116807250
		SPOCK3						LOC115496736								LOC116807254
		SPON2						LOC115496741								LOC116807264
		SPP1						LOC115496751								LOC116807267
		SPP2						LOC115496771								LOC116807287
		SPSB4						LOC115496778								LOC116807370
		SPTBN5						LOC115496789								LOC116807374
		SPTLC3						LOC115496806								LOC116807386
		SRPX						LOC115496811								LOC116807434
		SRRM4						LOC115496830								LOC116807454
		SSTR3						LOC115496843								LOC116807455
		ST3GAL1						LOC115496880								LOC116807477
		ST8SIA1						LOC115496885								LOC116807560
		ST8SIA2						LOC115496895								LOC116807600
		ST8SIA5						LOC115496897								LOC116807615
		STAMBPL1						LOC115496915								LOC116807642
		STARD13						LOC115496938								LOC116807644
		STARD4						LOC115496941								LOC116807654
		STAT3						LOC115496951								LOC116807680
		STAU1						LOC115496959								LOC116807691
		STC2						LOC115496963								LOC116807694
		STEAP3						LOC115496966								LOC116807704
		STK11IP						LOC115496967								LOC116807715
		STK32B						LOC115496974								LOC116807716
		STK32C						LOC115496984								LOC116807718
		STRA8						LOC115496985								LOC116807719
		STRIP2						LOC115496988								LOC116807736
		STUM						LOC115496993								LOC116807763
		STYK1						LOC115497031								LOC116807783
		SULF1						LOC115497032								LOC116807798
		SUPV3L1						LOC115497052								LOC116807801
		SUSD1						LOC115497056								LOC116807804
		SUSD4						LOC115497057								LOC116807808
		SVIL						LOC115497071								LOC116807826
		SVOPL						LOC115497092								LOC116807827
		SYAP1						LOC115497108								LOC116807828
		SYCN						LOC115497110								LOC116807831
		SYDE2						LOC115497113								LOC116807848
		SYN2						LOC115497118								LOC116807878
		SYNDIG1L						LOC115497143								LOC116807882
		SYNPO						LOC115497148								LOC116807885
		SYNPO2						LOC115497205								LOC116807893
		SYT17						LOC115497241								LOC116807894
		SYT6						LOC115497258								LOC116807897
		TAC1						LOC115497283								LOC116807918
		TACC1						LOC115497288								LOC116807937
		TAFA3						LOC115497289								LOC116807938
		TAFA4						LOC115497292								LOC116807946
		TAFA5						LOC115497297								LOC116807960
		TAGLN						LOC115497309								LOC116807961
		TBC1D1						LOC115497319								LOC116808017
		TBC1D16						LOC115497330								LOC116808027
		TBC1D19						LOC115497347								LOC116808036
		TBC1D2						LOC115497348								LOC116808041
		TBC1D30						LOC115497366								LOC116808053
		TBPL1						LOC115497382								LOC116808054
		TBR1						LOC115497383								LOC116808059
		TBX2						LOC115497392								LOC116808060
		TCAIM						LOC115497404								LOC116808064
		TCAP						LOC115497432								LOC116808070
		TCERG1L						LOC115497434								LOC116808071
		TCF7						LOC115497451								LOC116808072
		TCF7L2						LOC115497453								LOC116808076
		TCTE3						LOC115497479								LOC116808083
		TCTN3						LOC115497506								LOC116808097
		TEK						LOC115497519								LOC116808098
		TES						LOC115497532								LOC116808102
		TEX11						LOC115497538								LOC116808108
		TEX14						LOC115497546								LOC116808117
		TFAP2D						LOC115497549								LOC116808118
		TGFB2						LOC115497552								LOC116808143
		THBS2						LOC115497553								LOC116808150
		THOC7						LOC115497563								LOC116808158
		TIE1						LOC115497566								LOC116808159
		TIGAR						LOC115497567								LOC116808164
		TIMM21						LOC115497569								LOC116808165
		TMC5						LOC115497574								LOC116808192
		TMEFF2						LOC115497604								LOC116808217
		TMEM100						LOC115497612								LOC116808219
		TMEM106C						LOC115497614								LOC116808224
		TMEM164						LOC115497616								LOC116808225
		TMEM196						LOC115497635								LOC116808226
		TMEM200A						LOC115497655								LOC116808265
		TMEM200B						LOC115497674								LOC116808269
		TMEM200C						LOC115497694								LOC116808270
		TMEM215						LOC115497717								LOC116808272
		TMEM233						LOC115497742								LOC116808418
		TMEM238						LOC115497750								LOC116808421
		TMEM240						LOC115497767								LOC116808427
		TMEM25						LOC115497783								LOC116808444
		TMEM269						LOC115497790								LOC116808446
		TMEM272						LOC115497801								LOC116808458
		TMEM38A						LOC115497810								LOC116808459
		TMEM45A						LOC115497829								LOC116808463
		TMEM47						LOC115497891								LOC116808467
		TMEM53						LOC115497928								LOC116808472
		TMEM61						LOC115497955								LOC116808489
		TMEM74B						LOC115497975								LOC116808500
		TMEM8B						LOC115497990								LOC116808502
		TMEM94						LOC115498013								LOC116808543
		TMEM9B						LOC115498054								LOC116808545
		TMIE						LOC115498098								LOC116808550
		TMIGD1						LOC115498164								LOC116808558
		TMPPE						LOC115498199								LOC116808568
		TMSB15B						LOC115498214								LOC116808578
		TNFAIP6						LOC115498242								LOC116808583
		TNFAIP8L3						LOC115498287								LOC116808594
		TNFRSF11A						LOC115498306								LOC116808617
		TNFRSF25						LOC115498316								LOC116808630
		TNFRSF4						LOC115498337								LOC116808632
		TNNT3						LOC115498359								LOC116808637
		TOMM34						LOC115498426								LOC116808648
		TOP3A						LOC115498489								LOC116808650
		TOX2						LOC115498493								LOC116808659
		TP53I11						LOC115498517								LOC116808661
		TPBG						LOC115498523								LOC116808665
		TPCN2						LOC115498527								LOC116808671
		TPD52L1						LOC115498543								LOC116808677
		TPH2						LOC115498546								LOC116808689
		TPM1						LOC115498559								LOC116808692
		TPX2						LOC115498569								LOC116808702
		TRABD2A						LOC115498571								LOC116808707
		TRAK1						LOC115498593								LOC116808713
		TRIM67						LOC116806597								LOC116808714
		TRMT9B						LOC116806607								LOC116808715
		TRMU						LOC116806624								LOC116808716
		TRPC7						LOC116806633								LOC116808722
		TSEN2						LOC116806650								LOC116808731
		TSGA10						LOC116806661								LOC116808732
		TSHZ1						LOC116806669								LOC116808776
		TSHZ3						LOC116806680								LOC116808784
		TSPAN10						LOC116806682								LOC116808787
		TSPAN9						LOC116806699								LOC116808792
		TTC25						LOC116806724								LOC116808793
		TTC39B						LOC116806725								LOC116808807
		TTI1						LOC116806733								LOC116808808
		TXNDC16						LOC116806750								LOC116808823
		TXNDC9						LOC116806757								LOC116808830
		TXNRD2						LOC116806781								LOC116808838
		TYMS						LOC116806792								LOC116808887
		TYW3						LOC116806798								LOC116808896
		TYW5						LOC116806802								LOC116808897
		UBE2J1						LOC116806809								LOC116808899
		UBE2Q2						LOC116806811								LOC116808906
		UBE2QL1						LOC116806813								LOC116808909
		UBLCP1						LOC116806830								LOC116808915
		UBXN4						LOC116806852								LOC116808931
		UCHL1						LOC116806868								LOC116808934
		UCK1						LOC116806872								LOC116808939
		UCN3						LOC116806899								LOC116808946
		UFSP2						LOC116806907								LOC116808958
		UNC13C						LOC116806933								LOC116808962
		UNC93A						LOC116806954								LOC116808978
		UNCX						LOC116806992								LOC116808983
		UPP1						LOC116807007								LOC116808986
		USH1C						LOC116807009								LOC116809002
		USP20						LOC116807015								LOC116809005
		USP30						LOC116807028								LOC116809010
		USP53						LOC116807029								LOC116809030
		UTRN						LOC116807055								LOC116809036
		UTS2B						LOC116807099								LOC116809040
		VAMP1						LOC116807100								LOC116809049
		VASH2						LOC116807103								LOC116809060
		VAV2						LOC116807111								LOC116809088
		VCAM1						LOC116807125								LOC116809095
		VGLL3						LOC116807130								LOC116809126
		VIP						LOC116807135								LOC116809131
		VIPR1						LOC116807176								LOC116809154
		VIPR2						LOC116807181								LOC116809166
		VPREB3						LOC116807183								LOC116809171
		VPS26B						LOC116807233								LOC116809188
		VPS37A						LOC116807255								LOC116809190
		VRTN						LOC116807265								LOC116809192
		VSTM2B						LOC116807371								LOC116809204
		VSTM5						LOC116807375								LOC116809209
		WASF1						LOC116807376								LOC116809211
		WBP1L						LOC116807387								LOC116809243
		WDCP						LOC116807390								LOC116809251
		WDHD1						LOC116807393								LOC116809260
		WDR53						LOC116807445								LOC116809270
		WDR66						LOC116807470								LOC116809272
		WDR82						LOC116807501								LOC116809281
		WDR92						LOC116807607								LOC116809285
		WFDC1						LOC116807617								LOC116809290
		WFS1						LOC116807619								LOC116809309
		WIF1						LOC116807637								LOC116809315
		WNT1						LOC116807643								LOC116809316
		WNT9A						LOC116807650								LOC116809317
		WRAP53						LOC116807651								LOC116809318
		WSCD1						LOC116807658								LOC116809326
		XK						LOC116807665								LOC116809335
		XPR1						LOC116807670								LOC116809336
		XRCC2						LOC116807671								LONRF3
		YPEL5						LOC116807674								LOXL3
		YWHAB						LOC116807675								LPAR6
		YWHAG						LOC116807676								LPCAT1
		YWHAH						LOC116807695								LPCAT3
		YWHAQ						LOC116807698								LRAT
		YWHAZ						LOC116807708								LRATD1
		ZADH2						LOC116807713								LRBA
		ZBTB16						LOC116807724								LRFN2
		ZBTB18						LOC116807725								LRGUK
		ZBTB47						LOC116807734								LRIG1
		ZBTB49						LOC116807735								LRP6
		ZBTB5						LOC116807737								LRPPRC
		ZC3H12C						LOC116807749								LRRC17
		ZDHHC2						LOC116807750								LRRC37B
		ZDHHC20						LOC116807769								LRRC52
		ZDHHC22						LOC116807799								LRRC7
		ZEB2						LOC116807815								LRRC70
		ZMAT4						LOC116807818								LRRC8B
		ZMPSTE24						LOC116807820								LRRC8C
		ZMYM3						LOC116807824								LRRFIP2
		ZNF185						LOC116807832								LRRTM2
		ZNF385B						LOC116807835								LRTM1
		ZNF385C						LOC116807840								LSM4
		ZNF385D						LOC116807877								LSS
		ZNF521						LOC116807889								LTN1
		ZNF648						LOC116808042								LXN
		ZNF750						LOC116808051								LYPLA2
		ZNF804A						LOC116808062								LYPLAL1
		ZNF827						LOC116808063								LYRM9
		ZUP1						LOC116808066								LYSMD4
								LOC116808088								LYST
								LOC116808090								LYZ
								LOC116808119								LZTR1
								LOC116808126								LZTS1
								LOC116808132								LZTS2
								LOC116808173								MAB21L2
								LOC116808182								MAB21L4
								LOC116808199								MACIR
								LOC116808201								MACO1
								LOC116808221								MADD
								LOC116808248								MAEL
								LOC116808254								MAGI1
								LOC116808264								MAGI3
[truncated: 1,580 more rows]

## Sheet: c_HUB_Genes
PAL Floralwhite	PAL Saddlebrown	PAL Blue	PAL Darkolivegreen	PAL Darkturquoise	PAL Darkgreen
GNA11	KIAA0040	DPYSL3	COBL	PCDH17	ZCRB1
KIF11	LOC100190237	CALB1	VWC2	VAT1L	ALDH1L2
MRPL43	VAMP8	FOSL2	TXNL4A	LOC115494833	SLC25A3
SFRP5	CDH19	ADCY8	HACL1	LOC100221337	DEPDC4
FGFBP3	CLDN11	ST8SIA2	NRSN1	IKZF2	TPRKB
C6H10orf71	AFAP1L1	PTER	ST8SIA6	TMEM275	DMC1
GDF2	CNP	SLC35A1	TUBB6	RHBDL3	SYCE3
PPIF	REEP3	IRS2	NPHP3	LOC100232098	HELB
LOC100229828	PRAG1	ZMPSTE24	DPY19L1	KCNK10	REP15
RRP12	ARHGEF4	SLC18A2	ITGA9	UNC5D	BICD1
SFTPA	NKX6-2	SULF1	AGMO	SHISA6	ST13
OGDHL	GPR62	INSR	ASTE1	PLXNA4	COG5
PPP1R3C	LOC116809048	SEMA5A	FASTKD3	TRPC5	TWF1
LOC100230461	INHBB	NR4A3	LOC115493660	PALM2AKAP2	C1AH12orf73
KAZALD1	TSPAN2	AIFM3	TMEM158	MOB2	CENPM
LOC100218590	LCAT	NKX6-1	ULK4	TLL1	LOC115490906
SFR1	UGT8	BDNF		KCNG3	TXNRD1
SFXN2	EGFLAM	IGFBP5		LOC100230972	LOC115491386
EXOSC3	LOC100230949	ETV1		MET	XPNPEP3
GOLGA7B	TMEM125	STRIP2		CDH8	SEC61A2
SORCS1	FA2H	RS1		IGF1R	TTC26
D1DR	LOC116809112	CACNA1H		GRM1	APAF1
LOC100228612	PLP1	CDH2		ADORA3	SYCP3
LOC116808557	LOC101232962	NMBR		NRP1	LOC105758557
AVPI1	SPECC1	OTULINL		ID2	POLR3H
PYROXD2	S100B	KLHL1		EDA2R	SLC37A3
PLAC9	MBP	CACNG4		NOL4	LOC116806758
FAM204A	PPP1R16B	EPHA10		LOC115490949	NRCAM
	BCAS1	TSHZ1		CHL1
	AIF1L	C1QL3		FRMPD3
	LPAR1	NR4A2		KIF26B
	NINJ2	NPTXR		ANKFN1
	PIK3CB	IRS1		PTGFRN
	LOC100220740	FAM81A		LOC100229701
	GAB1	NFATC1		MRPS22
	LOC116807478	CACNG5		SGSM1
	BARX2	RD3L		ATP2A3
	ELOVL1	SYNDIG1L		NOS1
	ERMN	MAFK		IRAG1
	C6H10orf90	SCD5		TOX
	CD151	INKA2		RUNX2
	GLIPR2	SLC8A1		CYP2J40
	RAP1A	GNG2		PGM5
	SOX10	EPHB3		TRIM36
	LGR5	HS3ST4		CHRM5
	ENPP6	INHBA		PLXNC1
	FGFR2	LOC100231283		LCORL
	SLC6A9	LOC115491734
	DAAM2	TMEM61
	KIAA1210	DEXI
	CARNS1	SLC6A7
	APOH	ZEB2
	MYRF	CD164
	HAPLN2	CAMK1G
	TMEM63A	CDH11
	RASGRP3	THBS2
	IL12RB1	MYBPH
	NIBAN1	GAP43
	LOC115498461	NXNL2
		C5H11orf24
		PLXND1
		KCNH7
		PLEKHS1
		PCDH20
		RSU1
		LOC100228630
		SYT17
		SIAH3
		LMO4
		TES
		GPD1
		RBM20
		PRICKLE2
		KLF15
		UTRN
		EPHB6
		LOC115493855
		MME
		TMEM215
		ADCY5
		SATB2
		TBC1D2
		RGS10
		DHRSX
		KCNMB2
		GJB1
		LOC100221315
		FST
		EFCAB14
		TMEM233
		FZD4
		DLG3
		FAM53A
		LOC100220937
		LRP5
		DGKZ
		EBF1
		TP53I11
		RTN4RL1
		LOC100222314
		UCHL1
		HVCN1
		MPPED1
		NCOR2
		MEI4
		SLITRK1
		MPPED2
		HS3ST2
		DRD2
		DISP2
		GPSM1
		PPEF1
		KCNV1
		RORB
		PPARG
		NDNF
		ROBO1
		SATB1
		TMEM74B
		FSTL4
		PDE7B
		LOC115493671
		MYL2
		MMD
		KDF1
		ZMAT4
		RASGRP1
		LARGE1
		LSAMP
		PDE10A
		C9H3orf70
		NPR2
		PCP4
		TBC1D30
		ISL1
		IL1RAP
		LHX9
		PTPRS
		C7H2orf88
		KCNH5
		MXD4
		SKOR1
		AJAP1
		CYP2J19A
		PTPRF
		DCBLD1
		TSHZ3
		LOC100225594
		STUM
		SH3RF2
		ACVR2A
		CITED2
		DLX6
		PLD1
		GDPD4
		LOC115493907
		OSBPL9
		PDE2A
		RALYL
		ARHGDIB
		TMEM200B
		NEO1
		LOC105759092
		MSTN
		ITPR3
		RGS12
		BHLHE41
		HNF4A
		LOC105759937
		PPM1J
		RHOC
		FLRT3
		TMEM272
		JPH2
		LOC115495366
		NEXN
		PTPRU
		LIPG
		LOC116806735

## Sheet: d_GO_PAL_floralwhite
source	term_name	term_id	adjusted_p_value	negative_log10_of_adjusted_p_value	term_size	query_size	intersection_size	effective_domain_size	intersections
GO:MF	17-alpha-hydroxyprogesterone aldolase activity	GO:0047442	0.136089	0.866178	1	75	1	12400	LOC100218933
GO:MF	oxidoreductase activity, acting on phosphorus or arsenic in donors, disulfide as acceptor	GO:0030614	0.136089	0.866178	1	75	1	12400	LOC100228612
GO:MF	oxidoreductase activity, acting on phosphorus or arsenic in donors	GO:0030613	0.136089	0.866178	1	75	1	12400	LOC100228612
GO:MF	methylarsonate reductase activity	GO:0050610	0.136089	0.866178	1	75	1	12400	LOC100228612
GO:MF	steroid 17-alpha-monooxygenase activity	GO:0004508	0.136089	0.866178	1	75	1	12400	LOC100218933
GO:MF	glutathione dehydrogenase (ascorbate) activity	GO:0045174	0.136089	0.866178	1	75	1	12400	LOC100228612
GO:MF	arachidonate 5-lipoxygenase activity	GO:0004051	0.136089	0.866178	1	75	1	12400	ALOX5
GO:MF	oxidoreductase activity, acting on a sulfur group of donors, quinone or similar compound as acceptor	GO:0016672	0.136089	0.866178	1	75	1	12400	LOC100228612
GO:MF	chitinase activity	GO:0004568	0.136089	0.866178	1	75	1	12400	LOC100219821
GO:MF	photoreceptor activity	GO:0009881	0.136089	0.866178	9	75	2	12400	OPN4,RGR
GO:MF	17-alpha-hydroxyprogesterone aldolase activity	GO:0047442	0.136089	0.866178	1	75	1	12400	LOC100218933
GO:MF	oxidoreductase activity, acting on phosphorus or arsenic in donors, disulfide as acceptor	GO:0030614	0.136089	0.866178	1	75	1	12400	LOC100228612
GO:MF	oxidoreductase activity, acting on phosphorus or arsenic in donors	GO:0030613	0.136089	0.866178	1	75	1	12400	LOC100228612
GO:MF	methylarsonate reductase activity	GO:0050610	0.136089	0.866178	1	75	1	12400	LOC100228612
GO:MF	steroid 17-alpha-monooxygenase activity	GO:0004508	0.136089	0.866178	1	75	1	12400	LOC100218933
GO:MF	glutathione dehydrogenase (ascorbate) activity	GO:0045174	0.136089	0.866178	1	75	1	12400	LOC100228612
GO:MF	arachidonate 5-lipoxygenase activity	GO:0004051	0.136089	0.866178	1	75	1	12400	ALOX5
GO:MF	oxidoreductase activity, acting on a sulfur group of donors, quinone or similar compound as acceptor	GO:0016672	0.136089	0.866178	1	75	1	12400	LOC100228612
GO:MF	chitinase activity	GO:0004568	0.136089	0.866178	1	75	1	12400	LOC100219821
GO:MF	photoreceptor activity	GO:0009881	0.136089	0.866178	9	75	2	12400	OPN4,RGR
GO:MF	oxoglutarate dehydrogenase (succinyl-transferring) activity	GO:0004591	0.2075	0.682981	3	75	1	12400	OGDHL
GO:MF	serine hydrolase activity	GO:0017171	0.2075	0.682981	98	75	3	12400	LOC100229828,PLAU,RBP3
GO:MF	thiamine pyrophosphate binding	GO:0030976	0.2075	0.682981	4	75	1	12400	OGDHL
GO:MF	5'-deoxyribose-5-phosphate lyase activity	GO:0051575	0.2075	0.682981	4	75	1	12400	POLL
GO:MF	heparan sulfate proteoglycan binding	GO:0043395	0.2075	0.682981	4	75	1	12400	HPSE2
GO:MF	glutathione disulfide oxidoreductase activity	GO:0015038	0.2075	0.682981	2	75	1	12400	LOC100228612
GO:MF	chitin binding	GO:0008061	0.2075	0.682981	4	75	1	12400	LOC100219821
GO:MF	11-cis retinal binding	GO:0005502	0.2075	0.682981	4	75	1	12400	OPN4
GO:MF	structural constituent of postsynaptic actin cytoskeleton	GO:0098973	0.2075	0.682981	2	75	1	12400	INA
GO:MF	5'-3' exodeoxyribonuclease activity	GO:0035312	0.2075	0.682981	4	75	1	12400	DCLRE1A
GO:MF	structural constituent of postsynaptic intermediate filament cytoskeleton	GO:0099184	0.2075	0.682981	3	75	1	12400	INA
GO:MF	antioxidant activity	GO:0016209	0.2075	0.682981	36	75	2	12400	EXOSC3,LOC100228612
GO:MF	G protein-coupled photoreceptor activity	GO:0008020	0.2075	0.682981	2	75	1	12400	OPN4
GO:MF	glycogen binding	GO:2001069	0.2075	0.682981	3	75	1	12400	PPP1R3C
GO:MF	structural constituent of cytoskeleton	GO:0005200	0.2075	0.682981	37	75	2	12400	ADD3,INA
GO:MF	serine-type peptidase activity	GO:0008236	0.2075	0.682981	95	75	3	12400	LOC100229828,PLAU,RBP3
GO:MF	oxoglutarate dehydrogenase (succinyl-transferring) activity	GO:0004591	0.2075	0.682981	3	75	1	12400	OGDHL
GO:MF	serine hydrolase activity	GO:0017171	0.2075	0.682981	98	75	3	12400	LOC100229828,PLAU,RBP3
GO:MF	thiamine pyrophosphate binding	GO:0030976	0.2075	0.682981	4	75	1	12400	OGDHL
GO:MF	5'-deoxyribose-5-phosphate lyase activity	GO:0051575	0.2075	0.682981	4	75	1	12400	POLL
GO:MF	heparan sulfate proteoglycan binding	GO:0043395	0.2075	0.682981	4	75	1	12400	HPSE2
GO:MF	glutathione disulfide oxidoreductase activity	GO:0015038	0.2075	0.682981	2	75	1	12400	LOC100228612
GO:MF	chitin binding	GO:0008061	0.2075	0.682981	4	75	1	12400	LOC100219821
GO:MF	11-cis retinal binding	GO:0005502	0.2075	0.682981	4	75	1	12400	OPN4
GO:MF	structural constituent of postsynaptic actin cytoskeleton	GO:0098973	0.2075	0.682981	2	75	1	12400	INA
GO:MF	5'-3' exodeoxyribonuclease activity	GO:0035312	0.2075	0.682981	4	75	1	12400	DCLRE1A
GO:MF	structural constituent of postsynaptic intermediate filament cytoskeleton	GO:0099184	0.2075	0.682981	3	75	1	12400	INA
GO:MF	antioxidant activity	GO:0016209	0.2075	0.682981	36	75	2	12400	EXOSC3,LOC100228612
GO:MF	G protein-coupled photoreceptor activity	GO:0008020	0.2075	0.682981	2	75	1	12400	OPN4
GO:MF	glycogen binding	GO:2001069	0.2075	0.682981	3	75	1	12400	PPP1R3C
GO:MF	structural constituent of cytoskeleton	GO:0005200	0.2075	0.682981	37	75	2	12400	ADD3,INA
GO:MF	serine-type peptidase activity	GO:0008236	0.2075	0.682981	95	75	3	12400	LOC100229828,PLAU,RBP3
GO:MF	oxidoreductase activity, acting on the aldehyde or oxo group of donors, disulfide as acceptor	GO:0016624	0.249026	0.603756	5	75	1	12400	OGDHL
GO:MF	oxidoreductase activity, acting on the aldehyde or oxo group of donors, disulfide as acceptor	GO:0016624	0.249026	0.603756	5	75	1	12400	OGDHL
GO:MF	structural constituent of postsynapse	GO:0099186	0.267352	0.572917	7	75	1	12400	INA
GO:MF	aldehyde-lyase activity	GO:0016832	0.267352	0.572917	7	75	1	12400	LOC100218933
GO:MF	exodeoxyribonuclease activity	GO:0004529	0.267352	0.572917	7	75	1	12400	DCLRE1A
GO:MF	exodeoxyribonuclease activity, producing 5'-phosphomonoesters	GO:0016895	0.267352	0.572917	7	75	1	12400	DCLRE1A
GO:MF	phosphatidylinositol 3-kinase regulatory subunit binding	GO:0036312	0.267352	0.572917	7	75	1	12400	PIK3AP1
GO:MF	ribosomal small subunit binding	GO:0043024	0.267352	0.572917	6	75	1	12400	PTCD3
GO:MF	retinal binding	GO:0016918	0.267352	0.572917	6	75	1	12400	OPN4
GO:MF	5'-3' DNA helicase activity	GO:0043139	0.267352	0.572917	6	75	1	12400	TWNK
GO:MF	structural constituent of postsynapse	GO:0099186	0.267352	0.572917	7	75	1	12400	INA
GO:MF	aldehyde-lyase activity	GO:0016832	0.267352	0.572917	7	75	1	12400	LOC100218933
GO:MF	exodeoxyribonuclease activity	GO:0004529	0.267352	0.572917	7	75	1	12400	DCLRE1A
GO:MF	exodeoxyribonuclease activity, producing 5'-phosphomonoesters	GO:0016895	0.267352	0.572917	7	75	1	12400	DCLRE1A
GO:MF	phosphatidylinositol 3-kinase regulatory subunit binding	GO:0036312	0.267352	0.572917	7	75	1	12400	PIK3AP1
GO:MF	ribosomal small subunit binding	GO:0043024	0.267352	0.572917	6	75	1	12400	PTCD3
GO:MF	retinal binding	GO:0016918	0.267352	0.572917	6	75	1	12400	OPN4
GO:MF	5'-3' DNA helicase activity	GO:0043139	0.267352	0.572917	6	75	1	12400	TWNK
GO:MF	glutathione transferase activity	GO:0004364	0.288171	0.540349	8	75	1	12400	LOC100228612
GO:MF	steroid hydroxylase activity	GO:0008395	0.288171	0.540349	8	75	1	12400	LOC100218933
GO:MF	glutathione transferase activity	GO:0004364	0.288171	0.540349	8	75	1	12400	LOC100228612
GO:MF	steroid hydroxylase activity	GO:0008395	0.288171	0.540349	8	75	1	12400	LOC100218933
GO:BP	lipoxin metabolic process	GO:2001300	0.308216	0.511145	1	75	1	12400	ALOX5
GO:BP	toll-like receptor 4 signaling pathway	GO:0034142	0.308216	0.511145	18	75	2	12400	PIK3AP1,RAB11FIP2
GO:BP	cellular response to arsenic-containing substance	GO:0071243	0.308216	0.511145	10	75	2	12400	LOC100228612,PPIF
GO:BP	regulation of Wnt signaling pathway involved in digestive tract morphogenesis	GO:2000056	0.308216	0.511145	1	75	1	12400	SFRP5
GO:BP	xenobiotic catabolic process	GO:0042178	0.308216	0.511145	1	75	1	12400	LOC100228612
GO:BP	negative regulation of Wnt signaling pathway involved in digestive tract morphogenesis	GO:2000057	0.308216	0.511145	1	75	1	12400	SFRP5
GO:BP	Wnt signaling pathway involved in digestive tract morphogenesis	GO:0044333	0.308216	0.511145	1	75	1	12400	SFRP5
GO:BP	protein-chromophore linkage	GO:0018298	0.308216	0.511145	12	75	2	12400	OPN4,RGR
GO:BP	release of sequestered calcium ion into cytosol by sarcoplasmic reticulum	GO:0014808	0.308216	0.511145	12	75	2	12400	LOC100228612,METTL21C
GO:BP	cell migration involved in mesendoderm migration	GO:0090134	0.308216	0.511145	1	75	1	12400	FGF8
GO:BP	hormone-mediated apoptotic signaling pathway	GO:0008628	0.308216	0.511145	1	75	1	12400	METTL21C
GO:BP	melanocyte differentiation	GO:0030318	0.308216	0.511145	17	75	2	12400	GNA11,HPS6
GO:BP	release of sequestered calcium ion into cytosol by endoplasmic reticulum	GO:1903514	0.308216	0.511145	13	75	2	12400	LOC100228612,METTL21C
GO:BP	regulation of mitochondrial membrane permeability involved in programmed necrotic cell death	GO:1902445	0.308216	0.511145	1	75	1	12400	PPIF
GO:BP	regulation of proton-transporting ATPase activity, rotational mechanism	GO:0010849	0.308216	0.511145	1	75	1	12400	PPIF
GO:BP	leukotriene A4 metabolic process	GO:1901751	0.308216	0.511145	1	75	1	12400	ALOX5
GO:BP	phototransduction	GO:0007602	0.308216	0.511145	14	75	2	12400	OPN4,RGR
GO:BP	sarcoplasmic reticulum calcium ion transport	GO:0070296	0.308216	0.511145	14	75	2	12400	LOC100228612,METTL21C
GO:BP	regulation of release of sequestered calcium ion into cytosol by sarcoplasmic reticulum	GO:0010880	0.308216	0.511145	12	75	2	12400	LOC100228612,METTL21C
GO:BP	mesendoderm migration	GO:0090133	0.308216	0.511145	1	75	1	12400	FGF8
GO:BP	lipoxin biosynthetic process	GO:2001301	0.308216	0.511145	1	75	1	12400	ALOX5
GO:BP	leukotriene A4 biosynthetic process	GO:1901753	0.308216	0.511145	1	75	1	12400	ALOX5
GO:BP	optokinetic behavior	GO:0007634	0.308216	0.511145	1	75	1	12400	OPN4
GO:BP	response to arsenic-containing substance	GO:0046685	0.308216	0.511145	12	75	2	12400	LOC100228612,PPIF
GO:MF	polysaccharide binding	GO:0030247	0.314726	0.502068	9	75	1	12400	PPP1R3C
GO:MF	polysaccharide binding	GO:0030247	0.314726	0.502068	9	75	1	12400	PPP1R3C
GO:MF	cyclosporin A binding	GO:0016018	0.339719	0.46888	10	75	1	12400	PPIF
GO:MF	cyclosporin A binding	GO:0016018	0.339719	0.46888	10	75	1	12400	PPIF
GO:MF	methyltransferase activity	GO:0008168	0.339875	0.468681	148	75	3	12400	COMTD1,METTL21C,ZNF488
GO:MF	methyltransferase activity	GO:0008168	0.339875	0.468681	148	75	3	12400	COMTD1,METTL21C,ZNF488
GO:MF	pseudouridine synthase activity	GO:0009982	0.343586	0.463964	12	75	1	12400	TRUB1
GO:MF	GTP-dependent protein binding	GO:0030742	0.343586	0.463964	11	75	1	12400	HPS6
GO:MF	transferase activity, transferring one-carbon groups	GO:0016741	0.343586	0.463964	157	75	3	12400	COMTD1,METTL21C,ZNF488
GO:MF	ubiquitin conjugating enzyme activity	GO:0061631	0.343586	0.463964	12	75	1	12400	UBE2D1
GO:MF	DNA-directed DNA polymerase activity	GO:0003887	0.343586	0.463964	12	75	1	12400	POLL
GO:MF	structural constituent of synapse	GO:0098918	0.343586	0.463964	11	75	1	12400	INA
GO:MF	pseudouridine synthase activity	GO:0009982	0.343586	0.463964	12	75	1	12400	TRUB1
GO:MF	GTP-dependent protein binding	GO:0030742	0.343586	0.463964	11	75	1	12400	HPS6
GO:MF	transferase activity, transferring one-carbon groups	GO:0016741	0.343586	0.463964	157	75	3	12400	COMTD1,METTL21C,ZNF488
GO:MF	ubiquitin conjugating enzyme activity	GO:0061631	0.343586	0.463964	12	75	1	12400	UBE2D1
GO:MF	DNA-directed DNA polymerase activity	GO:0003887	0.343586	0.463964	12	75	1	12400	POLL
GO:MF	structural constituent of synapse	GO:0098918	0.343586	0.463964	11	75	1	12400	INA
GO:MF	oxidoreductase activity, acting on single donors with incorporation of molecular oxygen, incorporation of two atoms of oxygen	GO:0016702	0.347097	0.459549	16	75	1	12400	ALOX5
GO:MF	ubiquitin-like protein conjugating enzyme activity	GO:0061650	0.347097	0.459549	14	75	1	12400	UBE2D1
GO:MF	phosphatidylinositol 3-kinase binding	GO:0043548	0.347097	0.459549	16	75	1	12400	PIK3AP1
GO:MF	proteoglycan binding	GO:0043394	0.347097	0.459549	14	75	1	12400	HPSE2
GO:MF	isoprenoid binding	GO:0019840	0.347097	0.459549	15	75	1	12400	OPN4
GO:MF	vitamin binding	GO:0019842	0.347097	0.459549	83	75	2	12400	OGDHL,OPN4
GO:MF	DNA polymerase activity	GO:0034061	0.347097	0.459549	16	75	1	12400	POLL
GO:MF	G-protein beta/gamma-subunit complex binding	GO:0031683	0.347097	0.459549	15	75	1	12400	GNA11
GO:MF	hydrolase activity, acting on glycosyl bonds	GO:0016798	0.347097	0.459549	82	75	2	12400	HPSE2,LOC100219821
GO:MF	5'-3' exonuclease activity	GO:0008409	0.347097	0.459549	14	75	1	12400	DCLRE1A
GO:MF	triglyceride lipase activity	GO:0004806	0.347097	0.459549	14	75	1	12400	LOC100218590
GO:MF	retinoid binding	GO:0005501	0.347097	0.459549	15	75	1	12400	OPN4
GO:MF	serine-type endopeptidase activity	GO:0004252	0.347097	0.459549	84	75	2	12400	LOC100229828,PLAU
GO:MF	growth factor activity	GO:0008083	0.347097	0.459549	81	75	2	12400	FGF8,GDF2
GO:MF	oxidoreductase activity, acting on single donors with incorporation of molecular oxygen, incorporation of two atoms of oxygen	GO:0016702	0.347097	0.459549	16	75	1	12400	ALOX5
GO:MF	ubiquitin-like protein conjugating enzyme activity	GO:0061650	0.347097	0.459549	14	75	1	12400	UBE2D1
GO:MF	phosphatidylinositol 3-kinase binding	GO:0043548	0.347097	0.459549	16	75	1	12400	PIK3AP1
GO:MF	proteoglycan binding	GO:0043394	0.347097	0.459549	14	75	1	12400	HPSE2
GO:MF	isoprenoid binding	GO:0019840	0.347097	0.459549	15	75	1	12400	OPN4
GO:MF	vitamin binding	GO:0019842	0.347097	0.459549	83	75	2	12400	OGDHL,OPN4
GO:MF	DNA polymerase activity	GO:0034061	0.347097	0.459549	16	75	1	12400	POLL
GO:MF	G-protein beta/gamma-subunit complex binding	GO:0031683	0.347097	0.459549	15	75	1	12400	GNA11
GO:MF	hydrolase activity, acting on glycosyl bonds	GO:0016798	0.347097	0.459549	82	75	2	12400	HPSE2,LOC100219821
GO:MF	5'-3' exonuclease activity	GO:0008409	0.347097	0.459549	14	75	1	12400	DCLRE1A
GO:MF	triglyceride lipase activity	GO:0004806	0.347097	0.459549	14	75	1	12400	LOC100218590
GO:MF	retinoid binding	GO:0005501	0.347097	0.459549	15	75	1	12400	OPN4
GO:MF	serine-type endopeptidase activity	GO:0004252	0.347097	0.459549	84	75	2	12400	LOC100229828,PLAU
GO:MF	growth factor activity	GO:0008083	0.347097	0.459549	81	75	2	12400	FGF8,GDF2
GO:MF	oxidoreductase activity, acting on single donors with incorporation of molecular oxygen	GO:0016701	0.355844	0.44874	17	75	1	12400	ALOX5
GO:MF	O-methyltransferase activity	GO:0008171	0.355844	0.44874	17	75	1	12400	COMTD1
GO:MF	oxidoreductase activity, acting on single donors with incorporation of molecular oxygen	GO:0016701	0.355844	0.44874	17	75	1	12400	ALOX5
GO:MF	O-methyltransferase activity	GO:0008171	0.355844	0.44874	17	75	1	12400	COMTD1
GO:MF	fibroblast growth factor receptor binding	GO:0005104	0.37165	0.429866	19	75	1	12400	FGF8
GO:MF	disulfide oxidoreductase activity	GO:0015036	0.37165	0.429866	19	75	1	12400	LOC100228612
GO:MF	calcium-dependent phospholipid binding	GO:0005544	0.37165	0.429866	19	75	1	12400	ANXA7
GO:MF	catalytic activity, acting on DNA	GO:0140097	0.37165	0.429866	191	75	3	12400	DCLRE1A,POLL,TWNK
GO:MF	fibroblast growth factor receptor binding	GO:0005104	0.37165	0.429866	19	75	1	12400	FGF8
GO:MF	disulfide oxidoreductase activity	GO:0015036	0.37165	0.429866	19	75	1	12400	LOC100228612
GO:MF	calcium-dependent phospholipid binding	GO:0005544	0.37165	0.429866	19	75	1	12400	ANXA7
GO:MF	catalytic activity, acting on DNA	GO:0140097	0.37165	0.429866	191	75	3	12400	DCLRE1A,POLL,TWNK
GO:BP	detection of light stimulus	GO:0009583	0.377192	0.423438	22	75	2	12400	OPN4,RGR
GO:MF	drug binding	GO:0008144	0.383996	0.415673	20	75	1	12400	PPIF
GO:MF	drug binding	GO:0008144	0.383996	0.415673	20	75	1	12400	PPIF
GO:MF	iron ion binding	GO:0005506	0.385766	0.413676	97	75	2	12400	ALOX5,LOC100218933
GO:MF	iron ion binding	GO:0005506	0.385766	0.413676	97	75	2	12400	ALOX5,LOC100218933
GO:BP	larynx morphogenesis	GO:0120223	0.386518	0.41283	2	75	1	12400	FGF8
GO:BP	recombinational repair	GO:0000725	0.386518	0.41283	72	75	3	12400	POLL,SFR1,SHLD2
GO:BP	regulation of cation transmembrane transport	GO:1904062	0.386518	0.41283	134	75	4	12400	LOC100228612,METTL21C,PPIF,SHISA9
GO:BP	negative regulation of cardiac muscle tissue development	GO:0055026	0.386518	0.41283	2	75	1	12400	FGF8
GO:BP	negative regulation of oxidative phosphorylation	GO:0090324	0.386518	0.41283	2	75	1	12400	PPIF
GO:BP	TRAM-dependent toll-like receptor signaling pathway	GO:0035668	0.386518	0.41283	2	75	1	12400	RAB11FIP2
GO:BP	pigment cell differentiation	GO:0050931	0.386518	0.41283	23	75	2	12400	GNA11,HPS6
GO:BP	thermotaxis	GO:0043052	0.386518	0.41283	2	75	1	12400	OPN4
GO:BP	double-strand break repair via homologous recombination	GO:0000724	0.386518	0.41283	71	75	3	12400	POLL,SFR1,SHLD2
GO:BP	TRAM-dependent toll-like receptor 4 signaling pathway	GO:0035669	0.386518	0.41283	2	75	1	12400	RAB11FIP2
GO:BP	larynx development	GO:0120224	0.386518	0.41283	2	75	1	12400	FGF8
GO:BP	branching involved in blood vessel morphogenesis	GO:0001569	0.386518	0.41283	28	75	2	12400	FGF8,GDF2
GO:BP	epoxide metabolic process	GO:0097176	0.386518	0.41283	2	75	1	12400	ALOX5
GO:BP	negative regulation of oxidative phosphorylation uncoupler activity	GO:2000276	0.386518	0.41283	2	75	1	12400	PPIF
GO:MF	sulfur compound binding	GO:1901681	0.386638	0.412696	98	75	2	12400	HPSE2,OGDHL
GO:MF	sulfur compound binding	GO:1901681	0.386638	0.412696	98	75	2	12400	HPSE2,OGDHL
GO:MF	isomerase activity	GO:0016853	0.387513	0.411714	99	75	2	12400	PPIF,TRUB1
GO:MF	isomerase activity	GO:0016853	0.387513	0.411714	99	75	2	12400	PPIF,TRUB1
GO:BP	double-strand break repair via nonhomologous end joining	GO:0006303	0.4032	0.39448	29	75	2	12400	POLL,SHLD2
GO:MF	insulin-like growth factor binding	GO:0005520	0.413068	0.383979	23	75	1	12400	KAZALD1
GO:MF	insulin-like growth factor binding	GO:0005520	0.413068	0.383979	23	75	1	12400	KAZALD1
GO:BP	developmental pigmentation	GO:0048066	0.419828	0.376928	30	75	2	12400	GNA11,HPS6
GO:MF	intramolecular transferase activity	GO:0016866	0.423799	0.37284	24	75	1	12400	TRUB1
GO:MF	intramolecular transferase activity	GO:0016866	0.423799	0.37284	24	75	1	12400	TRUB1
GO:BP	corticotropin hormone secreting cell differentiation	GO:0060128	0.424218	0.372411	3	75	1	12400	FGF8
GO:BP	mucociliary clearance	GO:0120197	0.424218	0.372411	3	75	1	12400	CFAP43
GO:BP	regulation of release of sequestered calcium ion into cytosol	GO:0051279	0.424218	0.372411	33	75	2	12400	LOC100228612,METTL21C
GO:BP	cellular oxidant detoxification	GO:0098869	0.424218	0.372411	33	75	2	12400	EXOSC3,LOC100228612
GO:BP	leukocyte chemotaxis involved in inflammatory response	GO:0002232	0.424218	0.372411	3	75	1	12400	ALOX5
GO:BP	phospholipase C-activating dopamine receptor signaling pathway	GO:0060158	0.424218	0.372411	3	75	1	12400	GNA11
GO:BP	hyaloid vascular plexus regression	GO:1990384	0.424218	0.372411	3	75	1	12400	OPN4
GO:BP	base-excision repair, gap-filling	GO:0006287	0.424218	0.372411	3	75	1	12400	POLL
GO:BP	mesodermal cell migration	GO:0008078	0.424218	0.372411	3	75	1	12400	FGF8
GO:BP	regulation of ion transmembrane transporter activity	GO:0032412	0.424218	0.372411	91	75	3	12400	LOC100228612,PPIF,SHISA9
GO:BP	positive regulation of ryanodine-sensitive calcium-release channel activity	GO:0060316	0.424218	0.372411	3	75	1	12400	LOC100228612
GO:MF	deoxyribonuclease activity	GO:0004536	0.434139	0.362372	25	75	1	12400	DCLRE1A
GO:MF	deoxyribonuclease activity	GO:0004536	0.434139	0.362372	25	75	1	12400	DCLRE1A
GO:BP	mitochondrial gene expression	GO:0140053	0.434719	0.361791	52	75	2	12400	PTCD3,TWNK
GO:BP	toll-like receptor 7 signaling pathway	GO:0034154	0.434719	0.361791	5	75	1	12400	PIK3AP1
GO:BP	regulation of calcium ion transport into cytosol	GO:0010522	0.434719	0.361791	38	75	2	12400	LOC100228612,METTL21C
GO:BP	negative regulation of ATPase activity	GO:0032780	0.434719	0.361791	7	75	1	12400	PPIF
GO:BP	DNA replication-dependent nucleosome organization	GO:0034723	0.434719	0.361791	5	75	1	12400	CHAF1B
GO:BP	regulation of transmembrane transporter activity	GO:0022898	0.434719	0.361791	97	75	3	12400	LOC100228612,PPIF,SHISA9
GO:BP	toll-like receptor 2 signaling pathway	GO:0034134	0.434719	0.361791	7	75	1	12400	PIK3AP1
GO:BP	neural plate development	GO:0001840	0.434719	0.361791	7	75	1	12400	FGF8
GO:BP	detoxification	GO:0098754	0.434719	0.361791	43	75	2	12400	EXOSC3,LOC100228612
GO:BP	neural plate morphogenesis	GO:0001839	0.434719	0.361791	4	75	1	12400	FGF8
GO:BP	regulation of postsynaptic neurotransmitter receptor activity	GO:0098962	0.434719	0.361791	7	75	1	12400	SHISA9
GO:BP	negative regulation of transporter activity	GO:0032410	0.434719	0.361791	35	75	2	12400	LOC100228612,PPIF
GO:BP	negative regulation of cation transmembrane transport	GO:1904063	0.434719	0.361791	38	75	2	12400	LOC100228612,PPIF
GO:BP	regulation of transporter activity	GO:0032409	0.434719	0.361791	102	75	3	12400	LOC100228612,PPIF,SHISA9
GO:BP	progesterone metabolic process	GO:0042448	0.434719	0.361791	5	75	1	12400	LOC100218933
GO:BP	otic vesicle formation	GO:0030916	0.434719	0.361791	4	75	1	12400	FGF8
GO:BP	regulation of odontogenesis of dentin-containing tooth	GO:0042487	0.434719	0.361791	7	75	1	12400	FGF8
GO:BP	mRNA pseudouridine synthesis	GO:1990481	0.434719	0.361791	5	75	1	12400	TRUB1
GO:BP	cellular detoxification	GO:1990748	0.434719	0.361791	39	75	2	12400	EXOSC3,LOC100228612
GO:BP	regulation of oxidative phosphorylation uncoupler activity	GO:2000275	0.434719	0.361791	4	75	1	12400	PPIF
GO:BP	positive regulation of protein polyubiquitination	GO:1902916	0.434719	0.361791	5	75	1	12400	UBE2D1
GO:BP	midbrain-hindbrain boundary development	GO:0030917	0.434719	0.361791	6	75	1	12400	FGF8
GO:BP	negative regulation of ion transport	GO:0043271	0.434719	0.361791	53	75	2	12400	LOC100228612,PPIF
GO:BP	leukocyte migration involved in inflammatory response	GO:0002523	0.434719	0.361791	7	75	1	12400	ALOX5
GO:BP	regulation of AMPA receptor activity	GO:2000311	0.434719	0.361791	6	75	1	12400	SHISA9
GO:BP	negative regulation of cellular respiration	GO:1901856	0.434719	0.361791	4	75	1	12400	PPIF
GO:BP	positive regulation of double-strand break repair via nonhomologous end joining	GO:2001034	0.434719	0.361791	7	75	1	12400	SHLD2
GO:BP	negative regulation of ion transmembrane transport	GO:0034766	0.434719	0.361791	40	75	2	12400	LOC100228612,PPIF
GO:BP	regulation of ion transmembrane transport	GO:0034765	0.434719	0.361791	195	75	4	12400	LOC100228612,METTL21C,PPIF,SHISA9
GO:BP	negative regulation of transmembrane transport	GO:0034763	0.434719	0.361791	53	75	2	12400	LOC100228612,PPIF
GO:BP	negative regulation of calcium ion transport into cytosol	GO:0010523	0.434719	0.361791	6	75	1	12400	LOC100228612
GO:BP	regulation of oxidative phosphorylation	GO:0002082	0.434719	0.361791	7	75	1	12400	PPIF
GO:BP	MyD88-independent toll-like receptor signaling pathway	GO:0002756	0.434719	0.361791	7	75	1	12400	RAB11FIP2
GO:BP	DNA replication-dependent nucleosome assembly	GO:0006335	0.434719	0.361791	5	75	1	12400	CHAF1B
GO:BP	cellular response to toxic substance	GO:0097237	0.434719	0.361791	42	75	2	12400	EXOSC3,LOC100228612
GO:BP	regulation of sequestering of calcium ion	GO:0051282	0.434719	0.361791	50	75	2	12400	LOC100228612,METTL21C
GO:BP	otic vesicle morphogenesis	GO:0071600	0.434719	0.361791	6	75	1	12400	FGF8
GO:BP	adenohypophysis development	GO:0021984	0.434719	0.361791	6	75	1	12400	FGF8
GO:BP	positive regulation of endothelial cell differentiation	GO:0045603	0.434719	0.361791	7	75	1	12400	GDF2
GO:BP	regulation of melanocyte differentiation	GO:0045634	0.434719	0.361791	4	75	1	12400	GNA11
GO:BP	negative regulation of striated muscle tissue development	GO:0045843	0.434719	0.361791	6	75	1	12400	FGF8
GO:BP	cornea development in camera-type eye	GO:0061303	0.434719	0.361791	5	75	1	12400	KERA
GO:BP	neuroendocrine cell differentiation	GO:0061101	0.434719	0.361791	7	75	1	12400	FGF8
GO:BP	detection of temperature stimulus involved in thermoception	GO:0050960	0.434719	0.361791	4	75	1	12400	OPN4
GO:BP	forebrain dorsal/ventral pattern formation	GO:0021798	0.434719	0.361791	6	75	1	12400	FGF8
GO:BP	negative regulation of ryanodine-sensitive calcium-release channel activity	GO:0060315	0.434719	0.361791	6	75	1	12400	LOC100228612
GO:BP	sequestering of calcium ion	GO:0051208	0.434719	0.361791	52	75	2	12400	LOC100228612,METTL21C
GO:BP	embryonic neurocranium morphogenesis	GO:0048702	0.434719	0.361791	6	75	1	12400	FGF8
GO:BP	release of sequestered calcium ion into cytosol	GO:0051209	0.434719	0.361791	50	75	2	12400	LOC100228612,METTL21C
GO:BP	thyroid-stimulating hormone-secreting cell differentiation	GO:0060129	0.434719	0.361791	4	75	1	12400	FGF8
GO:BP	regulation of short-term neuronal synaptic plasticity	GO:0048172	0.434719	0.361791	5	75	1	12400	SHISA9
GO:BP	DNA unwinding involved in DNA replication	GO:0006268	0.434719	0.361791	5	75	1	12400	TWNK
GO:BP	leukotriene biosynthetic process	GO:0019370	0.434719	0.361791	7	75	1	12400	ALOX5
GO:BP	negative regulation of sequestering of calcium ion	GO:0051283	0.434719	0.361791	50	75	2	12400	LOC100228612,METTL21C
GO:BP	regulation of pigment cell differentiation	GO:0050932	0.434719	0.361791	5	75	1	12400	GNA11
GO:BP	negative regulation of release of sequestered calcium ion into cytosol	GO:0051280	0.434719	0.361791	6	75	1	12400	LOC100228612
GO:BP	L-ascorbic acid metabolic process	GO:0019852	0.434719	0.361791	4	75	1	12400	LOC100228612
GO:BP	positive regulation of sequestering of calcium ion	GO:0051284	0.434719	0.361791	7	75	1	12400	LOC100228612
GO:BP	cerebrospinal fluid circulation	GO:0090660	0.434719	0.361791	5	75	1	12400	CFAP43
GO:BP	negative regulation of muscle organ development	GO:0048635	0.434719	0.361791	7	75	1	12400	FGF8
GO:BP	thermoception	GO:0050955	0.434719	0.361791	5	75	1	12400	OPN4
GO:BP	mesendoderm development	GO:0048382	0.434719	0.361791	6	75	1	12400	FGF8
GO:BP	neurofilament cytoskeleton organization	GO:0060052	0.434719	0.361791	6	75	1	12400	INA
GO:BP	regulation of cardiac muscle tissue development	GO:0055024	0.434719	0.361791	4	75	1	12400	FGF8
GO:BP	detection of temperature stimulus involved in sensory perception	GO:0050961	0.434719	0.361791	7	75	1	12400	OPN4
GO:MF	oxidoreductase activity	GO:0016491	0.436352	0.360163	458	75	5	12400	ALOX5,LOC100218933,LOC100228612,OGDHL,PYROXD2
GO:MF	oxidoreductase activity	GO:0016491	0.436352	0.360163	458	75	5	12400	ALOX5,LOC100218933,LOC100228612,OGDHL,PYROXD2
GO:BP	regulation of mitotic centrosome separation	GO:0046602	0.444542	0.352087	8	75	1	12400	KIF11
GO:BP	negative regulation of DNA metabolic process	GO:0051053	0.444542	0.352087	58	75	2	12400	GDF2,SHLD2
GO:BP	toll-like receptor signaling pathway	GO:0002224	0.444542	0.352087	58	75	2	12400	PIK3AP1,RAB11FIP2
GO:BP	double-strand break repair	GO:0006302	0.444542	0.352087	135	75	3	12400	POLL,SFR1,SHLD2
GO:BP	positive regulation of G protein-coupled receptor signaling pathway	GO:0045745	0.444542	0.352087	8	75	1	12400	FGF8
GO:BP	anatomical structure regression	GO:0060033	0.444542	0.352087	8	75	1	12400	OPN4
GO:BP	detection of abiotic stimulus	GO:0009582	0.444542	0.352087	56	75	2	12400	OPN4,RGR
GO:BP	otic vesicle development	GO:0071599	0.444542	0.352087	8	75	1	12400	FGF8
GO:BP	detection of external stimulus	GO:0009581	0.444542	0.352087	57	75	2	12400	OPN4,RGR
GO:BP	negative regulation of muscle tissue development	GO:1901862	0.444542	0.352087	8	75	1	12400	FGF8
GO:BP	leukotriene metabolic process	GO:0006691	0.444542	0.352087	8	75	1	12400	ALOX5
GO:BP	energy derivation by oxidation of organic compounds	GO:0015980	0.444542	0.352087	132	75	3	12400	OGDHL,PPIF,PPP1R3C
GO:BP	regulation of proton transport	GO:0010155	0.444542	0.352087	8	75	1	12400	PPIF
GO:BP	pigmentation	GO:0043473	0.444542	0.352087	56	75	2	12400	GNA11,HPS6
GO:BP	toll-like receptor 9 signaling pathway	GO:0034162	0.444542	0.352087	8	75	1	12400	PIK3AP1
GO:BP	protein hexamerization	GO:0034214	0.444542	0.352087	8	75	1	12400	TWNK
GO:MF	rRNA binding	GO:0019843	0.45371	0.343222	27	75	1	12400	PTCD3
GO:MF	rRNA binding	GO:0019843	0.45371	0.343222	27	75	1	12400	PTCD3
GO:BP	regulation of ryanodine-sensitive calcium-release channel activity	GO:0060314	0.454594	0.342376	9	75	1	12400	LOC100228612
GO:BP	regulation of cation channel activity	GO:2001257	0.454594	0.342376	60	75	2	12400	LOC100228612,SHISA9
GO:BP	obsolete oxidation-reduction process	GO:0055114	0.454594	0.342376	334	75	5	12400	ALOX5,EXOSC3,LOC100218933,OGDHL,PYROXD2
GO:BP	forebrain morphogenesis	GO:0048853	0.454594	0.342376	9	75	1	12400	FGF8
GO:BP	mitochondrial DNA replication	GO:0006264	0.454594	0.342376	9	75	1	12400	TWNK
GO:BP	positive regulation of release of cytochrome c from mitochondria	GO:0090200	0.454594	0.342376	9	75	1	12400	PPIF
GO:BP	regulation of cilium beat frequency	GO:0003356	0.454594	0.342376	9	75	1	12400	CFAP43
GO:BP	ether biosynthetic process	GO:1901503	0.454594	0.342376	9	75	1	12400	ALOX5
GO:BP	calcium ion transmembrane import into cytosol	GO:0097553	0.454594	0.342376	60	75	2	12400	LOC100228612,METTL21C
GO:BP	fatty acid derivative biosynthetic process	GO:1901570	0.454594	0.342376	9	75	1	12400	ALOX5
GO:MF	oxidoreductase activity, acting on the aldehyde or oxo group of donors	GO:0016903	0.456959	0.340123	28	75	1	12400	OGDHL
GO:MF	calcium-dependent protein binding	GO:0048306	0.456959	0.340123	28	75	1	12400	ANXA7
GO:MF	oxidoreductase activity, acting on the aldehyde or oxo group of donors	GO:0016903	0.456959	0.340123	28	75	1	12400	OGDHL
GO:MF	calcium-dependent protein binding	GO:0048306	0.456959	0.340123	28	75	1	12400	ANXA7
GO:MF	nuclear receptor coactivator activity	GO:0030374	0.46272	0.334682	30	75	1	12400	SFR1
GO:MF	peptidyl-prolyl cis-trans isomerase activity	GO:0003755	0.46272	0.334682	29	75	1	12400	PPIF
GO:MF	scavenger receptor activity	GO:0005044	0.46272	0.334682	30	75	1	12400	LOC100229828
GO:MF	cis-trans isomerase activity	GO:0016859	0.46272	0.334682	30	75	1	12400	PPIF
GO:MF	nuclear receptor coactivator activity	GO:0030374	0.46272	0.334682	30	75	1	12400	SFR1
GO:MF	peptidyl-prolyl cis-trans isomerase activity	GO:0003755	0.46272	0.334682	29	75	1	12400	PPIF
GO:MF	scavenger receptor activity	GO:0005044	0.46272	0.334682	30	75	1	12400	LOC100229828
GO:MF	cis-trans isomerase activity	GO:0016859	0.46272	0.334682	30	75	1	12400	PPIF
GO:BP	cellular response to dexamethasone stimulus	GO:0071549	0.467636	0.330092	10	75	1	12400	METTL21C
GO:BP	mitotic centrosome separation	GO:0007100	0.467636	0.330092	10	75	1	12400	KIF11
GO:BP	negative regulation of release of cytochrome c from mitochondria	GO:0090201	0.467636	0.330092	10	75	1	12400	PPIF
GO:BP	epithelial to mesenchymal transition involved in endocardial cushion formation	GO:0003198	0.467636	0.330092	10	75	1	12400	FGF8
GO:BP	glucocorticoid biosynthetic process	GO:0006704	0.467636	0.330092	10	75	1	12400	LOC100218933
GO:BP	regulation of BMP signaling pathway	GO:0030510	0.467636	0.330092	64	75	2	12400	GDF2,SFRP5
GO:BP	rostrocaudal neural tube patterning	GO:0021903	0.467636	0.330092	10	75	1	12400	FGF8
GO:BP	centrosome separation	GO:0051299	0.467636	0.330092	10	75	1	12400	KIF11
GO:BP	regulation of calcium ion transmembrane transport	GO:1903169	0.467636	0.330092	65	75	2	12400	LOC100228612,METTL21C
GO:BP	regulation of transmembrane transport	GO:0034762	0.467636	0.330092	239	75	4	12400	LOC100228612,METTL21C,PPIF,SHISA9
GO:BP	regulation of protein polyubiquitination	GO:1902914	0.467636	0.330092	10	75	1	12400	UBE2D1
KEGG	Citrate cycle (TCA cycle)	KEGG:00020	0.468916	0.328905	15	75	1	12400	OGDHL
KEGG	Steroid hormone biosynthesis	KEGG:00140	0.468916	0.328905	21	75	1	12400	LOC100218933
KEGG	Drug metabolism - cytochrome P450	KEGG:00982	0.468916	0.328905	19	75	1	12400	LOC100228612
KEGG	RNA polymerase	KEGG:03020	0.468916	0.328905	15	75	1	12400	POLR3GL
KEGG	Base excision repair	KEGG:03410	0.468916	0.328905	22	75	1	12400	POLL
KEGG	Calcium signaling pathway	KEGG:04020	0.468916	0.328905	159	75	3	12400	FGF8,GNA11,PPIF
KEGG	Non-homologous end-joining	KEGG:03450	0.468916	0.328905	11	75	1	12400	POLL
KEGG	Metabolism of xenobiotics by cytochrome P450	KEGG:00980	0.468916	0.328905	19	75	1	12400	LOC100228612
GO:BP	DNA recombination	GO:0006310	0.469055	0.328777	147	75	3	12400	POLL,SFR1,SHLD2
KEGG	Cytosolic DNA-sensing pathway	KEGG:04623	0.469144	0.328693	25	75	1	12400	POLR3GL
KEGG	Glutathione metabolism	KEGG:00480	0.469144	0.328693	28	75	1	12400	LOC100228612
GO:BP	response to toxic substance	GO:0009636	0.470595	0.327353	66	75	2	12400	EXOSC3,LOC100228612
GO:BP	calcium ion transport into cytosol	GO:0060402	0.470595	0.327353	66	75	2	12400	LOC100228612,METTL21C
GO:MF	exonuclease activity, active with either ribo- or deoxyribonucleic acids and producing 5'-phosphomonoesters	GO:0016796	0.470942	0.327033	31	75	1	12400	DCLRE1A
GO:MF	exonuclease activity, active with either ribo- or deoxyribonucleic acids and producing 5'-phosphomonoesters	GO:0016796	0.470942	0.327033	31	75	1	12400	DCLRE1A
GO:MF	lyase activity	GO:0016829	0.47381	0.324395	125	75	2	12400	LOC100218933,POLL
GO:MF	lyase activity	GO:0016829	0.47381	0.324395	125	75	2	12400	LOC100218933,POLL
GO:MF	carbon-carbon lyase activity	GO:0016830	0.480832	0.318006	33	75	1	12400	LOC100218933
GO:MF	protein tyrosine/serine/threonine phosphatase activity	GO:0008138	0.480832	0.318006	33	75	1	12400	LOC105759360
GO:MF	carbon-carbon lyase activity	GO:0016830	0.480832	0.318006	33	75	1	12400	LOC100218933
GO:MF	protein tyrosine/serine/threonine phosphatase activity	GO:0008138	0.480832	0.318006	33	75	1	12400	LOC105759360
GO:MF	oxidoreductase activity, acting on a sulfur group of donors	GO:0016667	0.482614	0.3164	34	75	1	12400	LOC100228612
GO:MF	transferase activity, transferring alkyl or aryl (other than methyl) groups	GO:0016765	0.482614	0.3164	34	75	1	12400	LOC100228612
GO:MF	oxidoreductase activity, acting on a sulfur group of donors	GO:0016667	0.482614	0.3164	34	75	1	12400	LOC100228612
GO:MF	transferase activity, transferring alkyl or aryl (other than methyl) groups	GO:0016765	0.482614	0.3164	34	75	1	12400	LOC100228612
GO:BP	epithelial cilium movement involved in extracellular fluid movement	GO:0003351	0.48456	0.314653	11	75	1	12400	CFAP43
GO:BP	sensory perception of temperature stimulus	GO:0050951	0.48456	0.314653	11	75	1	12400	OPN4
GO:BP	detection of temperature stimulus	GO:0016048	0.48456	0.314653	11	75	1	12400	OPN4
GO:BP	cell migration involved in gastrulation	GO:0042074	0.48456	0.314653	11	75	1	12400	FGF8
GO:BP	cellular response to chemical stimulus	GO:0070887	0.48456	0.314653	1360	75	13	12400	ALOX5,EXOSC3,FGF8,GDF2,GNA11,INA,LOC100228612,METTL21C,PPIF,RAB11FIP2,SFR1,SFRP5,TNFRSF17
GO:BP	cellular response to estrogen stimulus	GO:0071391	0.48456	0.314653	11	75	1	12400	SFR1
KEGG	Amino sugar and nucleotide sugar metabolism	KEGG:00520	0.495403	0.305041	33	75	1	12400	LOC100219821
KEGG	Glycerolipid metabolism	KEGG:00561	0.495508	0.304949	39	75	1	12400	LOC100218590
KEGG	Drug metabolism - other enzymes	KEGG:00983	0.495508	0.304949	40	75	1	12400	LOC100228612
KEGG	Ribosome biogenesis in eukaryotes	KEGG:03008	0.495508	0.304949	46	75	1	12400	BMS1
KEGG	Endocytosis	KEGG:04144	0.495508	0.304949	158	75	2	12400	LOC100227500,RAB11FIP2
GO:MF	microtubule motor activity	GO:0003777	0.496637	0.303961	36	75	1	12400	KIF11
GO:MF	ATP-dependent microtubule motor activity	GO:1990939	0.496637	0.303961	36	75	1	12400	KIF11
GO:MF	microtubule motor activity	GO:0003777	0.496637	0.303961	36	75	1	12400	KIF11
GO:MF	ATP-dependent microtubule motor activity	GO:1990939	0.496637	0.303961	36	75	1	12400	KIF11
GO:BP	regulation of reactive oxygen species biosynthetic process	GO:1903426	0.497384	0.303308	12	75	1	12400	ALOX5
GO:BP	regulation of odontogenesis	GO:0042481	0.497384	0.303308	12	75	1	12400	FGF8
GO:BP	regulation of ion transport	GO:0043269	0.497384	0.303308	257	75	4	12400	LOC100228612,METTL21C,PPIF,SHISA9
GO:BP	mitochondrial transcription	GO:0006390	0.497384	0.303308	12	75	1	12400	TWNK
GO:BP	negative regulation of double-strand break repair via homologous recombination	GO:2000042	0.497384	0.303308	12	75	1	12400	SHLD2
GO:BP	plasminogen activation	GO:0031639	0.497384	0.303308	12	75	1	12400	PLAU
GO:BP	regulation of double-strand break repair via nonhomologous end joining	GO:2001032	0.497384	0.303308	12	75	1	12400	SHLD2
GO:BP	response to dexamethasone	GO:0071548	0.497384	0.303308	12	75	1	12400	METTL21C
GO:BP	response to ischemia	GO:0002931	0.497384	0.303308	12	75	1	12400	PPIF
GO:BP	aerobic respiration	GO:0009060	0.497384	0.303308	72	75	2	12400	OGDHL,PPIF
GO:BP	extracellular transport	GO:0006858	0.507066	0.294936	13	75	1	12400	CFAP43
GO:BP	neuroepithelial cell differentiation	GO:0060563	0.507066	0.294936	13	75	1	12400	FGF8
GO:BP	xenobiotic metabolic process	GO:0006805	0.507066	0.294936	13	75	1	12400	LOC100228612
GO:BP	detection of visible light	GO:0009584	0.507066	0.294936	13	75	1	12400	OPN4
GO:BP	regulation of aerobic respiration	GO:1903715	0.507066	0.294936	13	75	1	12400	PPIF
GO:BP	thyroid gland development	GO:0030878	0.507066	0.294936	13	75	1	12400	FGF8
GO:BP	branching involved in salivary gland morphogenesis	GO:0060445	0.507066	0.294936	13	75	1	12400	FGF8
GO:BP	cellular response to pH	GO:0071467	0.507066	0.294936	13	75	1	12400	GNA11
GO:BP	cell proliferation in forebrain	GO:0021846	0.507066	0.294936	13	75	1	12400	FGF8
GO:BP	signal transduction involved in regulation of gene expression	GO:0023019	0.507066	0.294936	13	75	1	12400	FGF8
GO:MF	lysine N-methyltransferase activity	GO:0016278	0.515992	0.287357	39	75	1	12400	METTL21C
GO:MF	PDZ domain binding	GO:0030165	0.515992	0.287357	39	75	1	12400	SHISA9
GO:MF	protein-lysine N-methyltransferase activity	GO:0016279	0.515992	0.287357	39	75	1	12400	METTL21C
GO:MF	lysine N-methyltransferase activity	GO:0016278	0.515992	0.287357	39	75	1	12400	METTL21C
GO:MF	PDZ domain binding	GO:0030165	0.515992	0.287357	39	75	1	12400	SHISA9
GO:MF	protein-lysine N-methyltransferase activity	GO:0016279	0.515992	0.287357	39	75	1	12400	METTL21C
GO:BP	mitochondrial outer membrane permeabilization involved in programmed cell death	GO:1902686	0.524401	0.280337	14	75	1	12400	PPIF
GO:BP	positive regulation of mitochondrial membrane permeability	GO:0035794	0.524401	0.280337	14	75	1	12400	PPIF
GO:BP	glucocorticoid metabolic process	GO:0008211	0.524401	0.280337	14	75	1	12400	LOC100218933
GO:BP	tricarboxylic acid cycle	GO:0006099	0.524401	0.280337	14	75	1	12400	OGDHL
GO:BP	negative regulation of calcium ion transmembrane transporter activity	GO:1901020	0.524401	0.280337	14	75	1	12400	LOC100228612
GO:BP	negative regulation of ATP metabolic process	GO:1903579	0.524401	0.280337	14	75	1	12400	PPIF
GO:BP	C21-steroid hormone metabolic process	GO:0008207	0.524401	0.280337	14	75	1	12400	LOC100218933
GO:MF	small GTPase binding	GO:0031267	0.527863	0.277479	145	75	2	12400	HPS6,RAB11FIP2
GO:MF	cargo receptor activity	GO:0038024	0.527863	0.277479	41	75	1	12400	LOC100229828
GO:MF	small GTPase binding	GO:0031267	0.527863	0.277479	145	75	2	12400	HPS6,RAB11FIP2
GO:MF	cargo receptor activity	GO:0038024	0.527863	0.277479	41	75	1	12400	LOC100229828
GO:BP	cytosolic calcium ion transport	GO:0060401	0.528777	0.276727	79	75	2	12400	LOC100228612,METTL21C
GO:BP	DNA repair	GO:0006281	0.535858	0.27095	274	75	4	12400	DCLRE1A,POLL,SFR1,SHLD2
GO:BP	pseudouridine synthesis	GO:0001522	0.540296	0.267368	15	75	1	12400	TRUB1
GO:BP	regulation of necrotic cell death	GO:0010939	0.540296	0.267368	15	75	1	12400	PPIF
GO:BP	positive regulation of mitotic nuclear division	GO:0045840	0.540296	0.267368	15	75	1	12400	FGF8
GO:BP	regulation of cilium movement	GO:0003352	0.540296	0.267368	15	75	1	12400	CFAP43
GO:BP	cellular response to xenobiotic stimulus	GO:0071466	0.540296	0.267368	15	75	1	12400	LOC100228612
GO:BP	male genitalia development	GO:0030539	0.54423	0.264217	16	75	1	12400	FGF8
GO:BP	ether metabolic process	GO:0018904	0.54423	0.264217	16	75	1	12400	ALOX5
GO:BP	visual perception	GO:0007601	0.54423	0.264217	84	75	2	12400	OPN4,RGR
GO:BP	positive regulation of release of sequestered calcium ion into cytosol	GO:0051281	0.54423	0.264217	16	75	1	12400	LOC100228612
GO:BP	positive regulation of isotype switching	GO:0045830	0.54423	0.264217	16	75	1	12400	SHLD2
GO:BP	positive regulation of membrane permeability	GO:1905710	0.54423	0.264217	16	75	1	12400	PPIF
GO:BP	positive regulation of B cell mediated immunity	GO:0002714	0.54423	0.264217	16	75	1	12400	SHLD2
GO:BP	pharyngeal system development	GO:0060037	0.54423	0.264217	16	75	1	12400	FGF8
GO:BP	reactive oxygen species biosynthetic process	GO:1903409	0.54423	0.264217	16	75	1	12400	ALOX5
GO:BP	pattern recognition receptor signaling pathway	GO:0002221	0.54423	0.264217	83	75	2	12400	PIK3AP1,RAB11FIP2
GO:BP	positive regulation of immunoglobulin mediated immune response	GO:0002891	0.54423	0.264217	16	75	1	12400	SHLD2
GO:CC	interstitial matrix	GO:0005614	0.546586	0.262342	7	75	1	12400	KAZALD1
GO:CC	sperm head	GO:0061827	0.546586	0.262342	5	75	1	12400	OPN4
GO:CC	sperm head plasma membrane	GO:1990913	0.546586	0.262342	2	75	1	12400	OPN4
GO:CC	sperm plasma membrane	GO:0097524	0.546586	0.262342	4	75	1	12400	OPN4
GO:CC	nuclear envelope lumen	GO:0005641	0.546586	0.262342	7	75	1	12400	ALOX5
GO:CC	CAF-1 complex	GO:0033186	0.546586	0.262342	3	75	1	12400	CHAF1B
GO:CC	Swi5-Sfr1 complex	GO:0032798	0.546586	0.262342	1	75	1	12400	SFR1
GO:CC	chromaffin granule membrane	GO:0042584	0.546586	0.262342	6	75	1	12400	ANXA7
GO:CC	mitochondrial permeability transition pore complex	GO:0005757	0.546586	0.262342	4	75	1	12400	PPIF
GO:CC	chromaffin granule	GO:0042583	0.546586	0.262342	6	75	1	12400	ANXA7
GO:CC	dendritic spine membrane	GO:0032591	0.546586	0.262342	5	75	1	12400	SHISA9
GO:CC	BLOC-2 complex	GO:0031084	0.546586	0.262342	3	75	1	12400	HPS6
GO:CC	DNA recombinase mediator complex	GO:0033061	0.546586	0.262342	6	75	1	12400	SFR1
GO:CC	neurofilament	GO:0005883	0.546586	0.262342	5	75	1	12400	INA
KEGG	GnRH signaling pathway	KEGG:04912	0.549197	0.260272	57	75	1	12400	GNA11
GO:BP	positive regulation of cytosolic calcium ion concentration	GO:0007204	0.5497	0.259874	87	75	2	12400	LOC100228612,METTL21C
GO:BP	dopamine receptor signaling pathway	GO:0007212	0.5497	0.259874	21	75	1	12400	GNA11
GO:BP	methylation	GO:0032259	0.5497	0.259874	206	75	3	12400	COMTD1,METTL21C,ZNF488
GO:BP	endocardial cushion formation	GO:0003272	0.5497	0.259874	17	75	1	12400	FGF8
GO:BP	positive regulation of calcium ion transmembrane transporter activity	GO:1901021	0.5497	0.259874	17	75	1	12400	LOC100228612
GO:BP	mitochondrial transport	GO:0006839	0.5497	0.259874	97	75	2	12400	PPIF,SFXN2
GO:BP	positive regulation of interleukin-8 production	GO:0032757	0.5497	0.259874	18	75	1	12400	GDF2
GO:BP	fatty acid derivative metabolic process	GO:1901568	0.5497	0.259874	19	75	1	12400	ALOX5
GO:BP	regulation of cellular respiration	GO:0043457	0.5497	0.259874	21	75	1	12400	PPIF
GO:BP	zymogen activation	GO:0031638	0.5497	0.259874	22	75	1	12400	PLAU
GO:BP	sperm flagellum assembly	GO:0120316	0.5497	0.259874	18	75	1	12400	CFAP43
GO:BP	positive regulation of immunoglobulin production	GO:0002639	0.5497	0.259874	21	75	1	12400	SHLD2
GO:BP	endocardial cushion morphogenesis	GO:0003203	0.5497	0.259874	23	75	1	12400	FGF8
GO:BP	negative regulation of calcium ion transmembrane transport	GO:1903170	0.5497	0.259874	17	75	1	12400	LOC100228612
GO:BP	aorta morphogenesis	GO:0035909	0.5497	0.259874	21	75	1	12400	FGF8
GO:BP	negative regulation of DNA biosynthetic process	GO:2000279	0.5497	0.259874	19	75	1	12400	GDF2
GO:BP	negative regulation of double-strand break repair	GO:2000780	0.5497	0.259874	19	75	1	12400	SHLD2
GO:BP	positive regulation of double-strand break repair	GO:2000781	0.5497	0.259874	20	75	1	12400	SHLD2
GO:BP	salivary gland morphogenesis	GO:0007435	0.5497	0.259874	20	75	1	12400	FGF8
GO:BP	negative regulation of cation channel activity	GO:2001258	0.5497	0.259874	21	75	1	12400	LOC100228612
GO:BP	positive regulation of cation channel activity	GO:2001259	0.5497	0.259874	22	75	1	12400	LOC100228612
GO:BP	regulation of immunoglobulin mediated immune response	GO:0002889	0.5497	0.259874	23	75	1	12400	SHLD2
GO:BP	activin receptor signaling pathway	GO:0032924	0.5497	0.259874	23	75	1	12400	GDF2
GO:BP	respiratory system process	GO:0003016	0.5497	0.259874	18	75	1	12400	CFAP43
GO:BP	regulation of B cell mediated immunity	GO:0002712	0.5497	0.259874	23	75	1	12400	SHLD2
GO:BP	BMP signaling pathway	GO:0030509	0.5497	0.259874	92	75	2	12400	GDF2,SFRP5
GO:BP	G protein-coupled receptor signaling pathway	GO:0007186	0.5497	0.259874	428	75	5	12400	ADGRA1,FGF8,GNA11,OPN4,RGR
GO:BP	pituitary gland development	GO:0021983	0.5497	0.259874	23	75	1	12400	FGF8
GO:BP	regulation of animal organ formation	GO:0003156	0.5497	0.259874	21	75	1	12400	FGF8
GO:BP	sperm axoneme assembly	GO:0007288	0.5497	0.259874	18	75	1	12400	CFAP43
GO:BP	forebrain regionalization	GO:0021871	0.5497	0.259874	20	75	1	12400	FGF8
GO:BP	subpallium development	GO:0021544	0.5497	0.259874	20	75	1	12400	FGF8
GO:BP	outflow tract septum morphogenesis	GO:0003148	0.5497	0.259874	18	75	1	12400	FGF8
GO:BP	salivary gland development	GO:0007431	0.5497	0.259874	21	75	1	12400	FGF8
GO:BP	regulation of neurotransmitter receptor activity	GO:0099601	0.5497	0.259874	21	75	1	12400	SHISA9
GO:BP	positive regulation of DNA recombination	GO:0045911	0.5497	0.259874	23	75	1	12400	SHLD2
GO:BP	cellular response to corticosteroid stimulus	GO:0071384	0.5497	0.259874	20	75	1	12400	METTL21C
GO:BP	regulation of isotype switching	GO:0045191	0.5497	0.259874	21	75	1	12400	SHLD2
GO:BP	negative regulation of calcium ion transport	GO:0051926	0.5497	0.259874	23	75	1	12400	LOC100228612
GO:BP	regulation of endothelial cell differentiation	GO:0045601	0.5497	0.259874	22	75	1	12400	GDF2
GO:BP	negative regulation of DNA repair	GO:0045738	0.5497	0.259874	19	75	1	12400	SHLD2
GO:BP	regulation of metal ion transport	GO:0010959	0.5497	0.259874	99	75	2	12400	LOC100228612,METTL21C
GO:BP	glucan biosynthetic process	GO:0009250	0.5497	0.259874	23	75	1	12400	PPP1R3C
GO:BP	necroptotic process	GO:0070266	0.5497	0.259874	19	75	1	12400	PPIF
GO:BP	positive regulation of pathway-restricted SMAD protein phosphorylation	GO:0010862	0.5497	0.259874	18	75	1	12400	GDF2
GO:BP	response to pH	GO:0009268	0.5497	0.259874	17	75	1	12400	GNA11
GO:BP	negative regulation of mitochondrion organization	GO:0010823	0.5497	0.259874	22	75	1	12400	PPIF
GO:BP	base-excision repair	GO:0006284	0.5497	0.259874	21	75	1	12400	POLL
GO:BP	protein polyubiquitination	GO:0000209	0.5497	0.259874	99	75	2	12400	MARCHF8,UBE2D1
GO:BP	response to xenobiotic stimulus	GO:0009410	0.5497	0.259874	19	75	1	12400	LOC100228612
GO:BP	mRNA modification	GO:0016556	0.5497	0.259874	22	75	1	12400	TRUB1
GO:BP	regulation of cytosolic calcium ion concentration	GO:0051480	0.5497	0.259874	96	75	2	12400	LOC100228612,METTL21C
GO:BP	detection of stimulus	GO:0051606	0.5497	0.259874	86	75	2	12400	OPN4,RGR
GO:BP	positive regulation of cartilage development	GO:0061036	0.5497	0.259874	20	75	1	12400	GDF2
GO:BP	regulation of microtubule-based movement	GO:0060632	0.5497	0.259874	19	75	1	12400	CFAP43
GO:BP	organ induction	GO:0001759	0.5497	0.259874	17	75	1	12400	FGF8
GO:BP	icosanoid biosynthetic process	GO:0046456	0.5497	0.259874	21	75	1	12400	ALOX5
GO:BP	regulation of mitochondrial membrane permeability	GO:0046902	0.5497	0.259874	17	75	1	12400	PPIF
GO:BP	maintenance of location in cell	GO:0051651	0.5497	0.259874	100	75	2	12400	LOC100228612,METTL21C
GO:BP	regulation of neuronal synaptic plasticity	GO:0048168	0.5497	0.259874	18	75	1	12400	SHISA9
GO:BP	positive regulation of nuclear division	GO:0051785	0.5497	0.259874	22	75	1	12400	FGF8
GO:BP	positive regulation of calcium ion transport into cytosol	GO:0010524	0.5497	0.259874	20	75	1	12400	LOC100228612
GO:BP	negative regulation of DNA recombination	GO:0045910	0.5497	0.259874	22	75	1	12400	SHLD2
GO:BP	cellular response to glucocorticoid stimulus	GO:0071385	0.5497	0.259874	17	75	1	12400	METTL21C
GO:BP	cellular respiration	GO:0045333	0.5497	0.259874	90	75	2	12400	OGDHL,PPIF
GO:BP	transcription by RNA polymerase III	GO:0006383	0.5497	0.259874	22	75	1	12400	POLR3GL
GO:BP	glycogen biosynthetic process	GO:0005978	0.5497	0.259874	23	75	1	12400	PPP1R3C
GO:BP	programmed necrotic cell death	GO:0097300	0.5497	0.259874	21	75	1	12400	PPIF
GO:BP	regulation of membrane permeability	GO:0090559	0.5497	0.259874	22	75	1	12400	PPIF
GO:BP	regulation of release of cytochrome c from mitochondria	GO:0090199	0.5497	0.259874	18	75	1	12400	PPIF
GO:BP	DNA biosynthetic process	GO:0071897	0.5497	0.259874	90	75	2	12400	GDF2,POLL
GO:BP	regulation of striated muscle tissue development	GO:0016202	0.5497	0.259874	22	75	1	12400	FGF8
GO:BP	blood vessel remodeling	GO:0001974	0.5497	0.259874	21	75	1	12400	FGF8
GO:BP	branching morphogenesis of an epithelial tube	GO:0048754	0.5497	0.259874	103	75	2	12400	FGF8,GDF2
GO:BP	water-soluble vitamin metabolic process	GO:0006767	0.5497	0.259874	18	75	1	12400	LOC100228612
GO:BP	cellular response to BMP stimulus	GO:0071773	0.5497	0.259874	96	75	2	12400	GDF2,SFRP5
GO:BP	sensory perception of light stimulus	GO:0050953	0.5497	0.259874	90	75	2	12400	OPN4,RGR
GO:BP	response to BMP	GO:0071772	0.5497	0.259874	96	75	2	12400	GDF2,SFRP5
GO:BP	regulation of calcium ion transport	GO:0051924	0.5497	0.259874	94	75	2	12400	LOC100228612,METTL21C
GO:BP	generation of precursor metabolites and energy	GO:0006091	0.5497	0.259874	205	75	3	12400	OGDHL,PPIF,PPP1R3C
GO:BP	release of cytochrome c from mitochondria	GO:0001836	0.5497	0.259874	20	75	1	12400	PPIF
GO:BP	dopaminergic neuron differentiation	GO:0071542	0.5497	0.259874	19	75	1	12400	FGF8
GO:BP	regulation of muscle organ development	GO:0048634	0.558444	0.25302	24	75	1	12400	FGF8
GO:BP	cardiac epithelial to mesenchymal transition	GO:0060317	0.558444	0.25302	24	75	1	12400	FGF8
GO:BP	brain morphogenesis	GO:0048854	0.558444	0.25302	24	75	1	12400	FGF8
GO:BP	response to glucocorticoid	GO:0051384	0.558444	0.25302	24	75	1	12400	METTL21C
GO:BP	ion transmembrane transport	GO:0034220	0.558444	0.25302	574	75	6	12400	LOC100228612,LOC100230461,METTL21C,PPIF,SFXN2,SHISA9
GO:BP	developmental induction	GO:0031128	0.558444	0.25302	24	75	1	12400	FGF8
GO:BP	specification of animal organ identity	GO:0010092	0.558444	0.25302	24	75	1	12400	FGF8
GO:BP	positive regulation of BMP signaling pathway	GO:0030513	0.562955	0.249526	25	75	1	12400	GDF2
GO:BP	positive regulation of animal organ morphogenesis	GO:0110110	0.562955	0.249526	25	75	1	12400	FGF8
GO:BP	phospholipase C-activating G protein-coupled receptor signaling pathway	GO:0007200	0.562955	0.249526	25	75	1	12400	GNA11
GO:BP	negative regulation of protein kinase B signaling	GO:0051898	0.562955	0.249526	25	75	1	12400	SFRP5
GO:BP	regulation of muscle tissue development	GO:1901861	0.562955	0.249526	25	75	1	12400	FGF8
GO:BP	negative regulation of endothelial cell proliferation	GO:0001937	0.562955	0.249526	25	75	1	12400	GDF2
GO:BP	positive regulation of organ growth	GO:0046622	0.562955	0.249526	25	75	1	12400	FGF8
GO:BP	response to estrogen	GO:0043627	0.562955	0.249526	25	75	1	12400	SFR1
GO:BP	necrotic cell death	GO:0070265	0.562955	0.249526	25	75	1	12400	PPIF
GO:BP	regulation of interleukin-8 production	GO:0032677	0.576233	0.239402	26	75	1	12400	GDF2
GO:BP	regulation of double-strand break repair via homologous recombination	GO:0010569	0.576233	0.239402	26	75	1	12400	SHLD2
GO:BP	interleukin-8 production	GO:0032637	0.576233	0.239402	26	75	1	12400	GDF2
GO:BP	regulation of pathway-restricted SMAD protein phosphorylation	GO:0060393	0.576233	0.239402	26	75	1	12400	GDF2
KEGG	Vascular smooth muscle contraction	KEGG:04270	0.578563	0.23765	75	75	1	12400	GNA11
KEGG	Carbon metabolism	KEGG:01200	0.578563	0.23765	71	75	1	12400	OGDHL
KEGG	Gap junction	KEGG:04540	0.578563	0.23765	70	75	1	12400	GNA11
GO:MF	G protein-coupled receptor activity	GO:0004930	0.579587	0.236882	283	75	3	12400	ADGRA1,OPN4,RGR
GO:MF	G protein-coupled receptor activity	GO:0004930	0.579587	0.236882	283	75	3	12400	ADGRA1,OPN4,RGR
GO:CC	phagocytic cup	GO:0001891	0.581295	0.235604	8	75	1	12400	RAB11FIP2
KEGG	Phagosome	KEGG:04145	0.58226	0.234883	86	75	1	12400	SFTPA
KEGG	Insulin signaling pathway	KEGG:04910	0.58226	0.234883	83	75	1	12400	PPP1R3C
GO:MF	DNA helicase activity	GO:0003678	0.582396	0.234782	47	75	1	12400	TWNK
GO:MF	DNA helicase activity	GO:0003678	0.582396	0.234782	47	75	1	12400	TWNK
GO:MF	chloride channel activity	GO:0005254	0.586975	0.23138	48	75	1	12400	LOC100230461
GO:MF	chloride channel activity	GO:0005254	0.586975	0.23138	48	75	1	12400	LOC100230461
GO:BP	embryonic hindlimb morphogenesis	GO:0035116	0.589052	0.229846	27	75	1	12400	FGF8
GO:BP	response to corticosteroid	GO:0031960	0.589052	0.229846	27	75	1	12400	METTL21C
GO:BP	intermediate filament cytoskeleton organization	GO:0045104	0.589052	0.229846	27	75	1	12400	INA
GO:BP	exocrine system development	GO:0035272	0.589052	0.229846	27	75	1	12400	FGF8
KEGG	Wnt signaling pathway	KEGG:04310	0.593605	0.226502	108	75	1	12400	SFRP5
KEGG	Protein processing in endoplasmic reticulum	KEGG:04141	0.593605	0.226502	108	75	1	12400	UBE2D1
KEGG	Ubiquitin mediated proteolysis	KEGG:04120	0.593605	0.226502	95	75	1	12400	UBE2D1
KEGG	Cytokine-cytokine receptor interaction	KEGG:04060	0.593605	0.226502	112	75	1	12400	GDF2
GO:BP	DNA metabolic process	GO:0006259	0.593833	0.226336	468	75	5	12400	DCLRE1A,GDF2,POLL,SFR1,SHLD2
GO:BP	protein peptidyl-prolyl isomerization	GO:0000413	0.593958	0.226244	28	75	1	12400	PPIF
GO:BP	neural tube patterning	GO:0021532	0.593958	0.226244	28	75	1	12400	FGF8
GO:BP	intermediate filament-based process	GO:0045103	0.593958	0.226244	28	75	1	12400	INA
GO:BP	cellular response to calcium ion	GO:0071277	0.593958	0.226244	28	75	1	12400	PPIF
GO:BP	mitochondrial RNA metabolic process	GO:0000959	0.593958	0.226244	28	75	1	12400	TWNK
GO:BP	visual behavior	GO:0007632	0.593958	0.226244	28	75	1	12400	OPN4
GO:BP	nucleosome assembly	GO:0006334	0.593958	0.226244	28	75	1	12400	CHAF1B
GO:MF	GTPase binding	GO:0051020	0.599749	0.22203	164	75	2	12400	HPS6,RAB11FIP2
GO:MF	GTPase binding	GO:0051020	0.599749	0.22203	164	75	2	12400	HPS6,RAB11FIP2
GO:MF	exonuclease activity	GO:0004527	0.599797	0.221996	51	75	1	12400	DCLRE1A
GO:MF	monooxygenase activity	GO:0004497	0.599797	0.221996	51	75	1	12400	LOC100218933
GO:MF	exonuclease activity	GO:0004527	0.599797	0.221996	51	75	1	12400	DCLRE1A
GO:MF	monooxygenase activity	GO:0004497	0.599797	0.221996	51	75	1	12400	LOC100218933
GO:BP	DNA conformation change	GO:0071103	0.60188	0.22049	118	75	2	12400	CHAF1B,TWNK
GO:BP	regulation of immunoglobulin production	GO:0002637	0.60188	0.22049	29	75	1	12400	SHLD2
GO:BP	motile cilium assembly	GO:0044458	0.60188	0.22049	29	75	1	12400	CFAP43
GO:BP	morphogenesis of a branching epithelium	GO:0061138	0.60188	0.22049	119	75	2	12400	FGF8,GDF2
GO:BP	positive regulation of calcium ion transmembrane transport	GO:1904427	0.60188	0.22049	29	75	1	12400	LOC100228612
GO:BP	negative regulation of ion transmembrane transporter activity	GO:0032413	0.60188	0.22049	29	75	1	12400	LOC100228612
GO:BP	lymphocyte homeostasis	GO:0002260	0.60188	0.22049	29	75	1	12400	TNFRSF17
GO:CC	dendrite membrane	GO:0032590	0.602024	0.220386	9	75	1	12400	SHISA9
GO:CC	mitochondrial matrix	GO:0005759	0.602024	0.220386	143	75	3	12400	OGDHL,PYROXD2,TWNK
GO:BP	positive regulation of epithelial cell differentiation	GO:0030858	0.611971	0.213269	31	75	1	12400	GDF2
GO:BP	positive regulation of mitochondrion organization	GO:0010822	0.611971	0.213269	31	75	1	12400	PPIF
GO:BP	heart looping	GO:0001947	0.611971	0.213269	31	75	1	12400	FGF8
GO:BP	tumor necrosis factor-mediated signaling pathway	GO:0033209	0.611971	0.213269	31	75	1	12400	TNFRSF17
GO:BP	nucleotide-excision repair	GO:0006289	0.611971	0.213269	31	75	1	12400	POLL
GO:BP	somatic recombination of immunoglobulin genes involved in immune response	GO:0002204	0.611971	0.213269	31	75	1	12400	SHLD2
GO:BP	isotype switching	GO:0045190	0.611971	0.213269	31	75	1	12400	SHLD2
GO:BP	endocardial cushion development	GO:0003197	0.611971	0.213269	30	75	1	12400	FGF8
GO:BP	pathway-restricted SMAD protein phosphorylation	GO:0060389	0.611971	0.213269	30	75	1	12400	GDF2
GO:BP	hormone biosynthetic process	GO:0042446	0.611971	0.213269	31	75	1	12400	LOC100218933
GO:BP	respiratory gaseous exchange by respiratory system	GO:0007585	0.611971	0.213269	31	75	1	12400	CFAP43
GO:BP	insulin secretion involved in cellular response to glucose stimulus	GO:0035773	0.611971	0.213269	30	75	1	12400	RAB11FIP2
GO:BP	negative regulation of endothelial cell migration	GO:0010596	0.611971	0.213269	31	75	1	12400	GDF2
GO:BP	somatic diversification of immunoglobulins involved in immune response	GO:0002208	0.611971	0.213269	31	75	1	12400	SHLD2
GO:MF	signaling receptor activity	GO:0038023	0.612978	0.212555	609	75	5	12400	ADGRA1,LOC100230461,OPN4,RGR,TNFRSF17
GO:MF	anion channel activity	GO:0005253	0.612978	0.212555	56	75	1	12400	LOC100230461
GO:MF	protease binding	GO:0002020	0.612978	0.212555	55	75	1	12400	TWNK
GO:MF	extracellular ligand-gated ion channel activity	GO:0005230	0.612978	0.212555	61	75	1	12400	LOC100230461
GO:MF	carboxylic ester hydrolase activity	GO:0052689	0.612978	0.212555	60	75	1	12400	LOC100218590
GO:MF	single-stranded DNA binding	GO:0003697	0.612978	0.212555	57	75	1	12400	TWNK
GO:MF	lipase activity	GO:0016298	0.612978	0.212555	60	75	1	12400	LOC100218590
GO:MF	molecular transducer activity	GO:0060089	0.612978	0.212555	609	75	5	12400	ADGRA1,LOC100230461,OPN4,RGR,TNFRSF17
GO:MF	receptor ligand activity	GO:0048018	0.612978	0.212555	186	75	2	12400	FGF8,GDF2
GO:MF	protein methyltransferase activity	GO:0008276	0.612978	0.212555	60	75	1	12400	METTL21C
GO:MF	carbon-oxygen lyase activity	GO:0016835	0.612978	0.212555	53	75	1	12400	POLL
GO:MF	N-methyltransferase activity	GO:0008170	0.612978	0.212555	55	75	1	12400	METTL21C
GO:MF	dioxygenase activity	GO:0051213	0.612978	0.212555	56	75	1	12400	ALOX5
GO:MF	heat shock protein binding	GO:0031072	0.612978	0.212555	61	75	1	12400	METTL21C
GO:MF	signaling receptor activity	GO:0038023	0.612978	0.212555	609	75	5	12400	ADGRA1,LOC100230461,OPN4,RGR,TNFRSF17
GO:MF	anion channel activity	GO:0005253	0.612978	0.212555	56	75	1	12400	LOC100230461
GO:MF	protease binding	GO:0002020	0.612978	0.212555	55	75	1	12400	TWNK
GO:MF	extracellular ligand-gated ion channel activity	GO:0005230	0.612978	0.212555	61	75	1	12400	LOC100230461
GO:MF	carboxylic ester hydrolase activity	GO:0052689	0.612978	0.212555	60	75	1	12400	LOC100218590
GO:MF	single-stranded DNA binding	GO:0003697	0.612978	0.212555	57	75	1	12400	TWNK
GO:MF	lipase activity	GO:0016298	0.612978	0.212555	60	75	1	12400	LOC100218590
GO:MF	molecular transducer activity	GO:0060089	0.612978	0.212555	609	75	5	12400	ADGRA1,LOC100230461,OPN4,RGR,TNFRSF17
GO:MF	receptor ligand activity	GO:0048018	0.612978	0.212555	186	75	2	12400	FGF8,GDF2
GO:MF	protein methyltransferase activity	GO:0008276	0.612978	0.212555	60	75	1	12400	METTL21C
GO:MF	carbon-oxygen lyase activity	GO:0016835	0.612978	0.212555	53	75	1	12400	POLL
GO:MF	N-methyltransferase activity	GO:0008170	0.612978	0.212555	55	75	1	12400	METTL21C
GO:MF	dioxygenase activity	GO:0051213	0.612978	0.212555	56	75	1	12400	ALOX5
GO:MF	heat shock protein binding	GO:0031072	0.612978	0.212555	61	75	1	12400	METTL21C
GO:BP	determination of heart left/right asymmetry	GO:0061371	0.615524	0.210755	32	75	1	12400	FGF8
GO:BP	digestive tract morphogenesis	GO:0048546	0.615524	0.210755	32	75	1	12400	SFRP5
GO:BP	icosanoid metabolic process	GO:0006690	0.615524	0.210755	32	75	1	12400	ALOX5
GO:BP	genitalia development	GO:0048806	0.615524	0.210755	32	75	1	12400	FGF8
GO:BP	olefinic compound metabolic process	GO:0120254	0.615524	0.210755	32	75	1	12400	LOC100218933
GO:BP	hindlimb morphogenesis	GO:0035137	0.615524	0.210755	32	75	1	12400	FGF8
GO:BP	immunoglobulin production involved in immunoglobulin-mediated immune response	GO:0002381	0.615524	0.210755	32	75	1	12400	SHLD2
GO:BP	lysosome localization	GO:0032418	0.615524	0.210755	32	75	1	12400	HPS6
GO:BP	morphogenesis of a branching structure	GO:0001763	0.618837	0.208424	127	75	2	12400	FGF8,GDF2
GO:BP	regulation of calcium ion transmembrane transporter activity	GO:1901019	0.618837	0.208424	33	75	1	12400	LOC100228612
GO:BP	mitochondrial translation	GO:0032543	0.618837	0.208424	33	75	1	12400	PTCD3
GO:BP	regulation of ATPase activity	GO:0043462	0.618837	0.208424	33	75	1	12400	PPIF
GO:BP	ribosome biogenesis	GO:0042254	0.618837	0.208424	127	75	2	12400	BMS1,EXOSC3
GO:BP	cellular response to endogenous stimulus	GO:0071495	0.618837	0.208424	631	75	6	12400	FGF8,GDF2,GNA11,METTL21C,SFR1,SFRP5
GO:BP	positive regulation of phosphatidylinositol 3-kinase signaling	GO:0014068	0.618837	0.208424	33	75	1	12400	PIK3AP1
GO:BP	vitamin metabolic process	GO:0006766	0.618837	0.208424	33	75	1	12400	LOC100228612
GO:MF	signaling receptor activator activity	GO:0030546	0.625109	0.204044	190	75	2	12400	FGF8,GDF2
GO:MF	signaling receptor activator activity	GO:0030546	0.625109	0.204044	190	75	2	12400	FGF8,GDF2
GO:BP	embryonic heart tube morphogenesis	GO:0003143	0.625274	0.20393	34	75	1	12400	FGF8
GO:BP	cellular polysaccharide biosynthetic process	GO:0033692	0.625274	0.20393	34	75	1	12400	PPP1R3C
GO:BP	extracellular matrix organization	GO:0030198	0.625274	0.20393	130	75	2	12400	HPSE2,KAZALD1
GO:BP	positive regulation of DNA repair	GO:0045739	0.625274	0.20393	34	75	1	12400	SHLD2
GO:BP	somatic recombination of immunoglobulin gene segments	GO:0016447	0.625274	0.20393	34	75	1	12400	SHLD2
GO:BP	external encapsulating structure organization	GO:0045229	0.625274	0.20393	130	75	2	12400	HPSE2,KAZALD1
GO:MF	hydrolase activity, hydrolyzing O-glycosyl compounds	GO:0004553	0.625433	0.203819	64	75	1	12400	LOC100219821
GO:MF	hydrolase activity, hydrolyzing O-glycosyl compounds	GO:0004553	0.625433	0.203819	64	75	1	12400	LOC100219821
GO:BP	extracellular structure organization	GO:0043062	0.627591	0.202323	131	75	2	12400	HPSE2,KAZALD1
GO:BP	mitotic spindle assembly	GO:0090307	0.63313	0.198507	35	75	1	12400	KIF11
GO:BP	response to dopamine	GO:1903350	0.63313	0.198507	35	75	1	12400	GNA11
GO:BP	mesenchyme morphogenesis	GO:0072132	0.63313	0.198507	35	75	1	12400	FGF8
GO:BP	cellular response to dopamine	GO:1903351	0.63313	0.198507	35	75	1	12400	GNA11
GO:BP	regulation of inflammatory response	GO:0050727	0.637282	0.195668	134	75	2	12400	ALOX5,PIK3AP1
GO:BP	embryonic cranial skeleton morphogenesis	GO:0048701	0.637282	0.195668	36	75	1	12400	FGF8
GO:BP	positive regulation of cell division	GO:0051781	0.637282	0.195668	36	75	1	12400	FGF8
GO:BP	protein K48-linked ubiquitination	GO:0070936	0.637282	0.195668	36	75	1	12400	UBE2D1
GO:BP	glutathione metabolic process	GO:0006749	0.637282	0.195668	36	75	1	12400	LOC100228612
GO:BP	branching involved in ureteric bud morphogenesis	GO:0001658	0.637282	0.195668	36	75	1	12400	FGF8
GO:BP	lung morphogenesis	GO:0060425	0.637282	0.195668	36	75	1	12400	FGF8
GO:MF	heme binding	GO:0020037	0.637431	0.195567	69	75	1	12400	LOC100218933
GO:MF	motor activity	GO:0003774	0.637431	0.195567	69	75	1	12400	KIF11
GO:MF	integrin binding	GO:0005178	0.637431	0.195567	67	75	1	12400	ANXA7
GO:MF	catalytic activity	GO:0003824	0.637431	0.195567	3625	75	24	12400	ALOX5,COMTD1,DCLRE1A,GNA11,HPSE2,KIF11,LOC100218590,LOC100218933,LOC100219821,LOC100228612,LOC100229828,LOC105759360,MARCHF8,METTL21C,OGDHL,PLAU,POLL,PPIF,PYROXD2,RBP3,TRUB1,TWNK,UBE2D1,ZNF488
GO:MF	ubiquitin-protein transferase activity	GO:0004842	0.637431	0.195567	199	75	2	12400	MARCHF8,UBE2D1
GO:MF	heme binding	GO:0020037	0.637431	0.195567	69	75	1	12400	LOC100218933
GO:MF	motor activity	GO:0003774	0.637431	0.195567	69	75	1	12400	KIF11
GO:MF	integrin binding	GO:0005178	0.637431	0.195567	67	75	1	12400	ANXA7
GO:MF	catalytic activity	GO:0003824	0.637431	0.195567	3625	75	24	12400	ALOX5,COMTD1,DCLRE1A,GNA11,HPSE2,KIF11,LOC100218590,LOC100218933,LOC100219821,LOC100228612,LOC100229828,LOC105759360,MARCHF8,METTL21C,OGDHL,PLAU,POLL,PPIF,PYROXD2,RBP3,TRUB1,TWNK,UBE2D1,ZNF488
GO:MF	ubiquitin-protein transferase activity	GO:0004842	0.637431	0.195567	199	75	2	12400	MARCHF8,UBE2D1
GO:BP	positive regulation of ion transmembrane transporter activity	GO:0032414	0.639524	0.194143	37	75	1	12400	LOC100228612
GO:BP	DNA replication	GO:0006260	0.639524	0.194143	137	75	2	12400	POLL,TWNK
GO:BP	cellular response to ketone	GO:1901655	0.639524	0.194143	37	75	1	12400	METTL21C
GO:BP	somatic diversification of immunoglobulins	GO:0016445	0.639524	0.194143	37	75	1	12400	SHLD2
GO:BP	cellular response to hydrogen peroxide	GO:0070301	0.639524	0.194143	37	75	1	12400	PPIF
GO:BP	apoptotic mitochondrial changes	GO:0008637	0.639524	0.194143	37	75	1	12400	PPIF
GO:BP	regulation of ATP metabolic process	GO:1903578	0.639524	0.194143	37	75	1	12400	PPIF
GO:BP	aorta development	GO:0035904	0.639524	0.194143	37	75	1	12400	FGF8
GO:CC	AMPA glutamate receptor complex	GO:0032281	0.646248	0.189601	11	75	1	12400	SHISA9
GO:CC	postsynapse	GO:0098794	0.646248	0.189601	254	75	4	12400	ADD3,INA,LOC100230461,SHISA9
GO:CC	BLOC complex	GO:0031082	0.646248	0.189601	12	75	1	12400	HPS6
GO:BP	response to catecholamine	GO:0071869	0.646519	0.189419	38	75	1	12400	GNA11
GO:BP	cellular response to monoamine stimulus	GO:0071868	0.646519	0.189419	38	75	1	12400	GNA11
GO:BP	response to monoamine	GO:0071867	0.646519	0.189419	38	75	1	12400	GNA11
GO:BP	positive regulation of B cell activation	GO:0050871	0.646519	0.189419	38	75	1	12400	SHLD2
GO:BP	cellular response to catecholamine stimulus	GO:0071870	0.646519	0.189419	38	75	1	12400	GNA11
GO:MF	protein phosphatase binding	GO:0019903	0.646906	0.189159	71	75	1	12400	PPP1R3C
GO:MF	protein phosphatase binding	GO:0019903	0.646906	0.189159	71	75	1	12400	PPP1R3C
GO:BP	response to light stimulus	GO:0009416	0.649365	0.187511	140	75	2	12400	OPN4,RGR
GO:MF	growth factor receptor binding	GO:0070851	0.650093	0.187025	73	75	1	12400	FGF8
GO:MF	hydrolase activity	GO:0016787	0.650093	0.187025	1431	75	10	12400	DCLRE1A,GNA11,HPSE2,KIF11,LOC100218590,LOC100219821,LOC100229828,LOC105759360,PLAU,RBP3
GO:MF	tetrapyrrole binding	GO:0046906	0.650093	0.187025	74	75	1	12400	LOC100218933
GO:MF	ubiquitin-like protein transferase activity	GO:0019787	0.650093	0.187025	210	75	2	12400	MARCHF8,UBE2D1
GO:MF	growth factor receptor binding	GO:0070851	0.650093	0.187025	73	75	1	12400	FGF8
GO:MF	hydrolase activity	GO:0016787	0.650093	0.187025	1431	75	10	12400	DCLRE1A,GNA11,HPSE2,KIF11,LOC100218590,LOC100219821,LOC100229828,LOC105759360,PLAU,RBP3
GO:MF	tetrapyrrole binding	GO:0046906	0.650093	0.187025	74	75	1	12400	LOC100218933
GO:MF	ubiquitin-like protein transferase activity	GO:0019787	0.650093	0.187025	210	75	2	12400	MARCHF8,UBE2D1
GO:BP	cellular glucan metabolic process	GO:0006073	0.651597	0.186021	39	75	1	12400	PPP1R3C
GO:BP	glucan metabolic process	GO:0044042	0.651597	0.186021	39	75	1	12400	PPP1R3C
GO:BP	peptidyl-proline modification	GO:0018208	0.651597	0.186021	39	75	1	12400	PPIF
GO:BP	glycogen metabolic process	GO:0005977	0.651597	0.186021	39	75	1	12400	PPP1R3C
GO:BP	animal organ formation	GO:0048645	0.651597	0.186021	39	75	1	12400	FGF8
GO:BP	positive regulation of transporter activity	GO:0032411	0.654212	0.184281	41	75	1	12400	LOC100228612
GO:BP	somatic diversification of immune receptors via germline recombination within a single locus	GO:0002562	0.654212	0.184281	41	75	1	12400	SHLD2
GO:BP	cellular carbohydrate biosynthetic process	GO:0034637	0.654212	0.184281	40	75	1	12400	PPP1R3C
GO:BP	somatic cell DNA recombination	GO:0016444	0.654212	0.184281	41	75	1	12400	SHLD2
GO:BP	negative regulation of epithelial cell migration	GO:0010633	0.654212	0.184281	41	75	1	12400	GDF2
GO:BP	polysaccharide biosynthetic process	GO:0000271	0.654212	0.184281	40	75	1	12400	PPP1R3C
GO:BP	positive regulation of lymphocyte mediated immunity	GO:0002708	0.654212	0.184281	40	75	1	12400	SHLD2
GO:BP	regulation of transmembrane receptor protein serine/threonine kinase signaling pathway	GO:0090092	0.654212	0.184281	145	75	2	12400	GDF2,SFRP5
GO:BP	glandular epithelial cell differentiation	GO:0002067	0.654212	0.184281	40	75	1	12400	FGF8
GO:BP	embryonic heart tube development	GO:0035050	0.654212	0.184281	40	75	1	12400	FGF8
GO:BP	regulation of cartilage development	GO:0061035	0.654212	0.184281	41	75	1	12400	GDF2
GO:BP	axoneme assembly	GO:0035082	0.654212	0.184281	41	75	1	12400	CFAP43
GO:BP	negative regulation of response to DNA damage stimulus	GO:2001021	0.654212	0.184281	40	75	1	12400	SHLD2
GO:BP	sex differentiation	GO:0007548	0.654212	0.184281	146	75	2	12400	FGF8,LOC100218933
GO:BP	endoderm development	GO:0007492	0.654212	0.184281	41	75	1	12400	FGF8
GO:BP	positive regulation of adaptive immune response based on somatic recombination of immune receptors built from immunoglobulin superfamily domains	GO:0002824	0.654212	0.184281	40	75	1	12400	SHLD2
GO:BP	cellular response to organic substance	GO:0071310	0.654212	0.184281	1098	75	9	12400	FGF8,GDF2,GNA11,INA,METTL21C,RAB11FIP2,SFR1,SFRP5,TNFRSF17
KEGG	Regulation of actin cytoskeleton	KEGG:04810	0.656657	0.182661	138	75	1	12400	FGF8
GO:BP	ureteric bud morphogenesis	GO:0060675	0.659073	0.181067	42	75	1	12400	FGF8
GO:BP	positive regulation of production of molecular mediator of immune response	GO:0002702	0.659073	0.181067	42	75	1	12400	SHLD2
GO:BP	positive regulation of adaptive immune response	GO:0002821	0.659073	0.181067	42	75	1	12400	SHLD2
GO:BP	response to endogenous stimulus	GO:0009719	0.659073	0.181067	677	75	6	12400	FGF8,GDF2,GNA11,METTL21C,SFR1,SFRP5
GO:BP	energy reserve metabolic process	GO:0006112	0.659073	0.181067	42	75	1	12400	PPP1R3C
GO:MF	ribonucleoprotein complex binding	GO:0043021	0.662795	0.178621	77	75	1	12400	PTCD3
GO:MF	ribonucleoprotein complex binding	GO:0043021	0.662795	0.178621	77	75	1	12400	PTCD3
GO:BP	odontogenesis of dentin-containing tooth	GO:0042475	0.664256	0.177664	44	75	1	12400	FGF8
GO:BP	nucleosome organization	GO:0034728	0.664256	0.177664	44	75	1	12400	CHAF1B
GO:BP	mesonephric tubule morphogenesis	GO:0072171	0.664256	0.177664	43	75	1	12400	FGF8
GO:BP	positive regulation of leukocyte mediated immunity	GO:0002705	0.664256	0.177664	43	75	1	12400	SHLD2
GO:BP	cellular response to glucose stimulus	GO:0071333	0.664256	0.177664	44	75	1	12400	RAB11FIP2
GO:BP	leukocyte homeostasis	GO:0001776	0.664256	0.177664	44	75	1	12400	TNFRSF17
GO:BP	vasculogenesis	GO:0001570	0.664256	0.177664	44	75	1	12400	GDF2
GO:BP	calcium ion transmembrane transport	GO:0070588	0.664256	0.177664	152	75	2	12400	LOC100228612,METTL21C
GO:BP	diencephalon development	GO:0021536	0.664256	0.177664	44	75	1	12400	FGF8
GO:BP	regulation of organ growth	GO:0046620	0.664256	0.177664	44	75	1	12400	FGF8
GO:BP	cellular calcium ion homeostasis	GO:0006874	0.664256	0.177664	151	75	2	12400	LOC100228612,METTL21C
GO:BP	positive regulation of calcium ion transport	GO:0051928	0.664256	0.177664	44	75	1	12400	LOC100228612
GO:BP	artery morphogenesis	GO:0048844	0.664256	0.177664	43	75	1	12400	FGF8
GO:BP	detection of stimulus involved in sensory perception	GO:0050906	0.664256	0.177664	43	75	1	12400	OPN4
GO:BP	regulation of phosphatidylinositol 3-kinase signaling	GO:0014066	0.666607	0.17613	45	75	1	12400	PIK3AP1
GO:BP	immunoglobulin mediated immune response	GO:0016064	0.666607	0.17613	45	75	1	12400	SHLD2
GO:BP	maintenance of location	GO:0051235	0.666607	0.17613	154	75	2	12400	LOC100228612,METTL21C
GO:BP	regulation of double-strand break repair	GO:2000779	0.666607	0.17613	45	75	1	12400	SHLD2
GO:BP	mitochondrial membrane organization	GO:0007006	0.666607	0.17613	45	75	1	12400	PPIF
GO:BP	somatic diversification of immune receptors	GO:0002200	0.666607	0.17613	45	75	1	12400	SHLD2
GO:BP	B cell mediated immunity	GO:0019724	0.666607	0.17613	45	75	1	12400	SHLD2
GO:BP	immunoglobulin production	GO:0002377	0.667311	0.175672	46	75	1	12400	SHLD2
GO:BP	regulation of nervous system process	GO:0031644	0.667311	0.175672	46	75	1	12400	SHISA9
GO:BP	cellular response to hexose stimulus	GO:0071331	0.667311	0.175672	46	75	1	12400	RAB11FIP2
GO:BP	cellular response to monosaccharide stimulus	GO:0071326	0.667311	0.175672	46	75	1	12400	RAB11FIP2
GO:BP	mitotic nuclear division	GO:0140014	0.667311	0.175672	155	75	2	12400	FGF8,KIF11
GO:BP	regulation of reactive oxygen species metabolic process	GO:2000377	0.667311	0.175672	46	75	1	12400	ALOX5
GO:BP	cellular hormone metabolic process	GO:0034754	0.667311	0.175672	46	75	1	12400	LOC100218933
GO:BP	positive regulation of endothelial cell proliferation	GO:0001938	0.667311	0.175672	46	75	1	12400	GDF2
GO:BP	response to chemical	GO:0042221	0.667916	0.175278	1740	75	13	12400	ALOX5,EXOSC3,FGF8,GDF2,GNA11,INA,LOC100228612,METTL21C,PPIF,RAB11FIP2,SFR1,SFRP5,TNFRSF17
GO:BP	cranial skeletal system development	GO:1904888	0.667916	0.175278	47	75	1	12400	FGF8
GO:BP	skeletal system development	GO:0001501	0.667916	0.175278	285	75	3	12400	FGF8,GDF2,GNA11
GO:BP	regulation of cell growth	GO:0001558	0.667916	0.175278	158	75	2	12400	GDF2,KAZALD1
GO:BP	cardiac septum morphogenesis	GO:0060411	0.667916	0.175278	47	75	1	12400	FGF8
GO:BP	response to hydrogen peroxide	GO:0042542	0.667916	0.175278	47	75	1	12400	PPIF
GO:BP	mitochondrial transmembrane transport	GO:1990542	0.667916	0.175278	47	75	1	12400	SFXN2
GO:BP	calcium ion homeostasis	GO:0055074	0.667916	0.175278	158	75	2	12400	LOC100228612,METTL21C
GO:BP	regulation of growth	GO:0040008	0.675725	0.17023	288	75	3	12400	FGF8,GDF2,KAZALD1
GO:BP	nephron tubule morphogenesis	GO:0072078	0.675725	0.17023	48	75	1	12400	FGF8
GO:BP	chromatin assembly	GO:0031497	0.675725	0.17023	48	75	1	12400	CHAF1B
GO:CC	asymmetric synapse	GO:0032279	0.677177	0.169298	108	75	2	12400	ADD3,SHISA9
GO:CC	extracellular region	GO:0005576	0.677177	0.169298	745	75	7	12400	CFAP43,FGF8,GDF2,KAZALD1,LOC100219821,LOC100229828,RBP3
GO:CC	lysosomal membrane	GO:0005765	0.677177	0.169298	95	75	2	12400	BORCS7,HPS6
GO:CC	lysosome	GO:0005764	0.677177	0.169298	218	75	3	12400	BORCS7,HPS6,MARCHF8
GO:CC	postsynaptic membrane	GO:0045211	0.677177	0.169298	117	75	2	12400	LOC100230461,SHISA9
GO:CC	mitochondrial nucleoid	GO:0042645	0.677177	0.169298	29	75	1	12400	TWNK
GO:CC	lytic vacuole	GO:0000323	0.677177	0.169298	218	75	3	12400	BORCS7,HPS6,MARCHF8
GO:CC	chloride channel complex	GO:0034707	0.677177	0.169298	27	75	1	12400	LOC100230461
GO:CC	integral component of postsynaptic density membrane	GO:0099061	0.677177	0.169298	20	75	1	12400	SHISA9
GO:CC	integral component of postsynaptic specialization membrane	GO:0099060	0.677177	0.169298	29	75	1	12400	SHISA9
GO:CC	postsynaptic specialization	GO:0099572	0.677177	0.169298	123	75	2	12400	ADD3,SHISA9
GO:CC	neuron to neuron synapse	GO:0098984	0.677177	0.169298	122	75	2	12400	ADD3,SHISA9
GO:CC	intrinsic component of postsynaptic specialization membrane	GO:0098948	0.677177	0.169298	31	75	1	12400	SHISA9
GO:CC	pore complex	GO:0046930	0.677177	0.169298	17	75	1	12400	PPIF
GO:CC	secretory granule membrane	GO:0030667	0.677177	0.169298	31	75	1	12400	ANXA7
GO:CC	lytic vacuole membrane	GO:0098852	0.677177	0.169298	95	75	2	12400	BORCS7,HPS6
GO:CC	postsynaptic density membrane	GO:0098839	0.677177	0.169298	26	75	1	12400	SHISA9
GO:CC	exoribonuclease complex	GO:1905354	0.677177	0.169298	18	75	1	12400	EXOSC3
GO:CC	neuron projection membrane	GO:0032589	0.677177	0.169298	14	75	1	12400	SHISA9
GO:CC	exosome (RNase complex)	GO:0000178	0.677177	0.169298	17	75	1	12400	EXOSC3
GO:CC	nuclear chromosome	GO:0000228	0.677177	0.169298	100	75	2	12400	ADD3,SFR1
GO:CC	neurotransmitter receptor complex	GO:0098878	0.677177	0.169298	22	75	1	12400	SHISA9
GO:CC	postsynaptic density	GO:0014069	0.677177	0.169298	108	75	2	12400	ADD3,SHISA9
GO:CC	intrinsic component of postsynaptic density membrane	GO:0099146	0.677177	0.169298	22	75	1	12400	SHISA9
GO:CC	ionotropic glutamate receptor complex	GO:0008328	0.677177	0.169298	22	75	1	12400	SHISA9
GO:CC	spindle microtubule	GO:0005876	0.677177	0.169298	32	75	1	12400	KIF11
GO:CC	nucleoid	GO:0009295	0.677177	0.169298	29	75	1	12400	TWNK
GO:CC	vacuolar membrane	GO:0005774	0.677177	0.169298	125	75	2	12400	BORCS7,HPS6
GO:MF	growth factor binding	GO:0019838	0.678826	0.168242	83	75	1	12400	KAZALD1
GO:MF	endopeptidase activity	GO:0004175	0.678826	0.168242	226	75	2	12400	LOC100229828,PLAU
GO:MF	nucleotidyltransferase activity	GO:0016779	0.678826	0.168242	83	75	1	12400	POLL
GO:MF	G protein-coupled receptor binding	GO:0001664	0.678826	0.168242	83	75	1	12400	GNA11
GO:MF	protein tyrosine phosphatase activity	GO:0004725	0.678826	0.168242	81	75	1	12400	LOC105759360
GO:MF	growth factor binding	GO:0019838	0.678826	0.168242	83	75	1	12400	KAZALD1
GO:MF	endopeptidase activity	GO:0004175	0.678826	0.168242	226	75	2	12400	LOC100229828,PLAU
GO:MF	nucleotidyltransferase activity	GO:0016779	0.678826	0.168242	83	75	1	12400	POLL
GO:MF	G protein-coupled receptor binding	GO:0001664	0.678826	0.168242	83	75	1	12400	GNA11
GO:MF	protein tyrosine phosphatase activity	GO:0004725	0.678826	0.168242	81	75	1	12400	LOC105759360
GO:BP	outflow tract morphogenesis	GO:0003151	0.680408	0.167231	49	75	1	12400	FGF8
GO:BP	flagellated sperm motility	GO:0030317	0.680408	0.167231	49	75	1	12400	CFAP43
GO:BP	regulation of DNA recombination	GO:0000018	0.680408	0.167231	49	75	1	12400	SHLD2
GO:BP	sperm motility	GO:0097722	0.680408	0.167231	49	75	1	12400	CFAP43
GO:BP	oxidative phosphorylation	GO:0006119	0.680408	0.167231	49	75	1	12400	PPIF
GO:MF	transmembrane signaling receptor activity	GO:0004888	0.681069	0.166809	532	75	4	12400	ADGRA1,LOC100230461,OPN4,RGR
GO:MF	transmembrane signaling receptor activity	GO:0004888	0.681069	0.166809	532	75	4	12400	ADGRA1,LOC100230461,OPN4,RGR
GO:BP	muscle organ development	GO:0007517	0.682607	0.165829	163	75	2	12400	FGF8,METTL21C
GO:MF	peptidase activity	GO:0008233	0.682741	0.165744	381	75	3	12400	LOC100229828,PLAU,RBP3
GO:MF	peptidase activity	GO:0008233	0.682741	0.165744	381	75	3	12400	LOC100229828,PLAU,RBP3
GO:CC	vacuole	GO:0005773	0.683146	0.165487	275	75	3	12400	BORCS7,HPS6,MARCHF8
GO:CC	9+2 motile cilium	GO:0097729	0.683146	0.165487	52	75	1	12400	CFAP43
GO:CC	Schaffer collateral - CA1 synapse	GO:0098685	0.683146	0.165487	48	75	1	12400	INA
GO:CC	site of double-strand break	GO:0035861	0.683146	0.165487	34	75	1	12400	SHLD2
GO:CC	brush border	GO:0005903	0.683146	0.165487	50	75	1	12400	ADD3
GO:CC	synaptic membrane	GO:0097060	0.683146	0.165487	145	75	2	12400	LOC100230461,SHISA9
GO:CC	external encapsulating structure	GO:0030312	0.683146	0.165487	151	75	2	12400	HPSE2,KAZALD1
GO:CC	ion channel complex	GO:0034702	0.683146	0.165487	160	75	2	12400	LOC100230461,SHISA9
GO:CC	dendritic spine	GO:0043197	0.683146	0.165487	40	75	1	12400	SHISA9
GO:CC	neuron spine	GO:0044309	0.683146	0.165487	43	75	1	12400	SHISA9
GO:CC	chromosome	GO:0005694	0.683146	0.165487	571	75	5	12400	ADD3,BMS1,CHAF1B,SFR1,SHLD2
GO:CC	nuclear periphery	GO:0034399	0.683146	0.165487	48	75	1	12400	ALOX5
GO:CC	nuclear matrix	GO:0016363	0.683146	0.165487	40	75	1	12400	ALOX5
GO:CC	I band	GO:0031674	0.683146	0.165487	50	75	1	12400	LDB3
GO:CC	axoneme	GO:0005930	0.683146	0.165487	52	75	1	12400	CFAP43
GO:CC	ciliary plasm	GO:0097014	0.683146	0.165487	52	75	1	12400	CFAP43
GO:CC	intermediate filament	GO:0005882	0.683146	0.165487	42	75	1	12400	INA
GO:CC	Z disc	GO:0030018	0.683146	0.165487	45	75	1	12400	LDB3
GO:CC	postsynaptic specialization membrane	GO:0099634	0.683146	0.165487	38	75	1	12400	SHISA9
GO:CC	intrinsic component of postsynaptic membrane	GO:0098936	0.683146	0.165487	45	75	1	12400	SHISA9
GO:CC	extracellular matrix	GO:0031012	0.683146	0.165487	151	75	2	12400	HPSE2,KAZALD1
GO:CC	integral component of postsynaptic membrane	GO:0099055	0.683146	0.165487	41	75	1	12400	SHISA9
GO:CC	site of DNA damage	GO:0090734	0.683146	0.165487	49	75	1	12400	SHLD2
GO:CC	condensed nuclear chromosome	GO:0000794	0.683146	0.165487	36	75	1	12400	ADD3
GO:CC	organelle envelope lumen	GO:0031970	0.683146	0.165487	41	75	1	12400	ALOX5
GO:BP	B cell activation involved in immune response	GO:0002312	0.68492	0.16436	50	75	1	12400	SHLD2
GO:BP	renal tubule morphogenesis	GO:0061333	0.68492	0.16436	50	75	1	12400	FGF8
GO:BP	nephron epithelium morphogenesis	GO:0072088	0.68492	0.16436	50	75	1	12400	FGF8
GO:BP	cellular response to carbohydrate stimulus	GO:0071322	0.68492	0.16436	50	75	1	12400	RAB11FIP2
GO:MF	inorganic anion transmembrane transporter activity	GO:0015103	0.686211	0.163542	88	75	1	12400	LOC100230461
GO:MF	carbohydrate binding	GO:0030246	0.686211	0.163542	88	75	1	12400	PPP1R3C
GO:MF	inorganic anion transmembrane transporter activity	GO:0015103	0.686211	0.163542	88	75	1	12400	LOC100230461
GO:MF	carbohydrate binding	GO:0030246	0.686211	0.163542	88	75	1	12400	PPP1R3C
GO:CC	transmembrane transporter complex	GO:1902495	0.686589	0.163303	171	75	2	12400	LOC100230461,SHISA9
GO:CC	integral component of synaptic membrane	GO:0099699	0.686589	0.163303	54	75	1	12400	SHISA9
GO:BP	cellular divalent inorganic cation homeostasis	GO:0072503	0.687046	0.163014	165	75	2	12400	LOC100228612,METTL21C
GO:BP	fibroblast growth factor receptor signaling pathway	GO:0008543	0.687812	0.16253	51	75	1	12400	FGF8
GO:BP	nephron morphogenesis	GO:0072028	0.687812	0.16253	51	75	1	12400	FGF8
GO:BP	DNA geometric change	GO:0032392	0.687812	0.16253	51	75	1	12400	TWNK
GO:BP	DNA duplex unwinding	GO:0032508	0.687812	0.16253	51	75	1	12400	TWNK
GO:BP	cellular polysaccharide metabolic process	GO:0044264	0.687812	0.16253	51	75	1	12400	PPP1R3C
GO:BP	negative regulation of intrinsic apoptotic signaling pathway	GO:2001243	0.690564	0.160796	52	75	1	12400	PPIF
GO:BP	positive regulation of response to DNA damage stimulus	GO:2001022	0.690564	0.160796	52	75	1	12400	SHLD2
GO:BP	endothelial cell differentiation	GO:0045446	0.690564	0.160796	52	75	1	12400	GDF2
GO:BP	regulation of lymphocyte mediated immunity	GO:0002706	0.690564	0.160796	52	75	1	12400	SHLD2
GO:BP	positive regulation of cation transmembrane transport	GO:1904064	0.690564	0.160796	52	75	1	12400	LOC100228612
GO:BP	regulation of G protein-coupled receptor signaling pathway	GO:0008277	0.690564	0.160796	52	75	1	12400	FGF8
GO:BP	cellular response to DNA damage stimulus	GO:0006974	0.690853	0.160614	437	75	4	12400	DCLRE1A,POLL,SFR1,SHLD2
GO:BP	carbohydrate metabolic process	GO:0005975	0.693937	0.15868	302	75	3	12400	LOC100219821,LOC100228612,PPP1R3C
GO:BP	response to ketone	GO:1901654	0.693937	0.15868	53	75	1	12400	METTL21C
GO:BP	cellular chemical homeostasis	GO:0055082	0.693937	0.15868	302	75	3	12400	LOC100228612,METTL21C,RAB11FIP2
GO:BP	regulation of circadian rhythm	GO:0042752	0.693937	0.15868	53	75	1	12400	OPN4
GO:BP	response to calcium ion	GO:0051592	0.693937	0.15868	53	75	1	12400	PPIF
GO:MF	protein binding	GO:0005515	0.695258	0.157854	4913	75	31	12400	ADGRA1,ALOX5,ANKRD2,ANKRD22,ANXA7,CFAP43,CHAF1B,FGF8,GDF2,GNA11,GOLGA7B,HPS6,HPSE2,KAZALD1,KERA,KIF11,LDB3,LOC100218590,LOC100228612,LRMDA,METTL21C,PIK3AP1,PPP1R3C,PTCD3,RAB11FIP2,SAMD8,SFRP5,SHISA9,SORCS1,TWNK,ZNF488
GO:MF	protein binding	GO:0005515	0.695258	0.157854	4913	75	31	12400	ADGRA1,ALOX5,ANKRD2,ANKRD22,ANXA7,CFAP43,CHAF1B,FGF8,GDF2,GNA11,GOLGA7B,HPS6,HPSE2,KAZALD1,KERA,KIF11,LDB3,LOC100218590,LOC100228612,LRMDA,METTL21C,PIK3AP1,PPP1R3C,PTCD3,RAB11FIP2,SAMD8,SFRP5,SHISA9,SORCS1,TWNK,ZNF488
GO:BP	regulation of mitotic nuclear division	GO:0007088	0.701369	0.154053	54	75	1	12400	FGF8
GO:BP	cation transmembrane transport	GO:0098655	0.701369	0.154053	443	75	4	12400	LOC100228612,METTL21C,PPIF,SHISA9
GO:BP	cellular response to stimulus	GO:0051716	0.703753	0.15258	3526	75	24	12400	ADGRA1,ALOX5,ARHGAP19,AVPI1,DCLRE1A,EXOSC3,FGF8,GDF2,GNA11,INA,KNDC1,LOC100228612,METTL21C,OPN4,PIK3AP1,POLL,PPIF,RAB11FIP2,RGR,SFR1,SFRP5,SHISA9,SHLD2,TNFRSF17
GO:BP	protein-DNA complex assembly	GO:0065004	0.703753	0.15258	55	75	1	12400	CHAF1B
GO:BP	dorsal/ventral pattern formation	GO:0009953	0.703753	0.15258	55	75	1	12400	FGF8
GO:BP	regulation of cellular response to growth factor stimulus	GO:0090287	0.703753	0.15258	174	75	2	12400	GDF2,SFRP5
GO:BP	activation of MAPK activity	GO:0000187	0.703753	0.15258	55	75	1	12400	AVPI1
GO:BP	divalent inorganic cation homeostasis	GO:0072507	0.703753	0.15258	174	75	2	12400	LOC100228612,METTL21C
GO:MF	peptide binding	GO:0042277	0.706442	0.150924	96	75	1	12400	PPIF
GO:MF	S-adenosylmethionine-dependent methyltransferase activity	GO:0008757	0.706442	0.150924	95	75	1	12400	METTL21C
GO:MF	oxidoreductase activity, acting on paired donors, with incorporation or reduction of molecular oxygen	GO:0016705	0.706442	0.150924	95	75	1	12400	LOC100218933
GO:MF	phosphatase binding	GO:0019902	0.706442	0.150924	96	75	1	12400	PPP1R3C
GO:MF	peptide binding	GO:0042277	0.706442	0.150924	96	75	1	12400	PPIF
GO:MF	S-adenosylmethionine-dependent methyltransferase activity	GO:0008757	0.706442	0.150924	95	75	1	12400	METTL21C
GO:MF	oxidoreductase activity, acting on paired donors, with incorporation or reduction of molecular oxygen	GO:0016705	0.706442	0.150924	95	75	1	12400	LOC100218933
GO:MF	phosphatase binding	GO:0019902	0.706442	0.150924	96	75	1	12400	PPP1R3C
GO:BP	metanephros development	GO:0001656	0.708708	0.149533	56	75	1	12400	FGF8
GO:BP	negative regulation of inflammatory response	GO:0050728	0.708708	0.149533	56	75	1	12400	ALOX5
GO:BP	regulation of DNA metabolic process	GO:0051052	0.708708	0.149533	176	75	2	12400	GDF2,SHLD2
GO:BP	spindle assembly	GO:0051225	0.708708	0.149533	56	75	1	12400	KIF11
GO:BP	regulation of generation of precursor metabolites and energy	GO:0043467	0.712173	0.147414	57	75	1	12400	PPIF
GO:BP	regulation of signaling receptor activity	GO:0010469	0.712173	0.147414	57	75	1	12400	SHISA9
GO:BP	polysaccharide metabolic process	GO:0005976	0.712173	0.147414	57	75	1	12400	PPP1R3C
GO:BP	cilium movement involved in cell motility	GO:0060294	0.712173	0.147414	57	75	1	12400	CFAP43
GO:BP	embryonic skeletal system morphogenesis	GO:0048704	0.712173	0.147414	57	75	1	12400	FGF8
GO:CC	transporter complex	GO:1990351	0.713988	0.146309	179	75	2	12400	LOC100230461,SHISA9
GO:BP	microtubule-based movement	GO:0007018	0.71562	0.145317	179	75	2	12400	CFAP43,KIF11
GO:BP	cilium or flagellum-dependent cell motility	GO:0001539	0.715924	0.145133	59	75	1	12400	CFAP43
GO:BP	positive regulation of ion transmembrane transport	GO:0034767	0.715924	0.145133	59	75	1	12400	LOC100228612
GO:BP	kidney morphogenesis	GO:0060993	0.715924	0.145133	59	75	1	12400	FGF8
GO:BP	positive regulation of protein ubiquitination	GO:0031398	0.715924	0.145133	58	75	1	12400	UBE2D1
GO:BP	regulation of B cell activation	GO:0050864	0.715924	0.145133	59	75	1	12400	SHLD2
GO:BP	cilium-dependent cell motility	GO:0060285	0.715924	0.145133	59	75	1	12400	CFAP43
GO:BP	regulation of DNA biosynthetic process	GO:2000278	0.715924	0.145133	59	75	1	12400	GDF2
GO:BP	nephron tubule development	GO:0072080	0.715924	0.145133	59	75	1	12400	FGF8
GO:BP	cellular glucose homeostasis	GO:0001678	0.715924	0.145133	59	75	1	12400	RAB11FIP2
GO:BP	regulation of production of molecular mediator of immune response	GO:0002700	0.715924	0.145133	58	75	1	12400	SHLD2
GO:BP	action potential	GO:0001508	0.715924	0.145133	58	75	1	12400	GNA11
GO:BP	determination of left/right symmetry	GO:0007368	0.716547	0.144755	60	75	1	12400	FGF8
GO:BP	chromatin assembly or disassembly	GO:0006333	0.716547	0.144755	61	75	1	12400	CHAF1B
GO:BP	artery development	GO:0060840	0.716547	0.144755	61	75	1	12400	FGF8
GO:BP	endothelium development	GO:0003158	0.716547	0.144755	60	75	1	12400	GDF2
GO:BP	epithelium migration	GO:0090132	0.716547	0.144755	184	75	2	12400	FGF8,GDF2
GO:BP	epithelial cell differentiation	GO:0030855	0.716547	0.144755	319	75	3	12400	ANXA7,FGF8,GDF2
GO:BP	regulation of mitochondrion organization	GO:0010821	0.716547	0.144755	60	75	1	12400	PPIF
GO:BP	mitotic spindle organization	GO:0007052	0.716547	0.144755	61	75	1	12400	KIF11
GO:BP	positive regulation of transmembrane receptor protein serine/threonine kinase signaling pathway	GO:0090100	0.716547	0.144755	61	75	1	12400	GDF2
GO:BP	microtubule bundle formation	GO:0001578	0.716547	0.144755	60	75	1	12400	CFAP43
GO:BP	cellular response to fibroblast growth factor stimulus	GO:0044344	0.716547	0.144755	61	75	1	12400	FGF8
GO:BP	camera-type eye development	GO:0043010	0.716547	0.144755	185	75	2	12400	KERA,OPN4
GO:BP	response to fibroblast growth factor	GO:0071774	0.716547	0.144755	61	75	1	12400	FGF8
GO:BP	regulation of adaptive immune response based on somatic recombination of immune receptors built from immunoglobulin superfamily domains	GO:0002822	0.716547	0.144755	60	75	1	12400	SHLD2
GO:BP	sensory organ development	GO:0007423	0.716564	0.144745	323	75	3	12400	FGF8,KERA,OPN4
GO:MF	ligand-gated ion channel activity	GO:0015276	0.717749	0.144027	100	75	1	12400	LOC100230461
GO:MF	ligand-gated channel activity	GO:0022834	0.717749	0.144027	100	75	1	12400	LOC100230461
GO:MF	ligand-gated ion channel activity	GO:0015276	0.717749	0.144027	100	75	1	12400	LOC100230461
GO:MF	ligand-gated channel activity	GO:0022834	0.717749	0.144027	100	75	1	12400	LOC100230461
GO:BP	tissue migration	GO:0090130	0.720462	0.142389	187	75	2	12400	FGF8,GDF2
GO:BP	columnar/cuboidal epithelial cell differentiation	GO:0002065	0.722149	0.141373	62	75	1	12400	FGF8
GO:BP	phosphatidylinositol 3-kinase signaling	GO:0014065	0.723573	0.140518	63	75	1	12400	PIK3AP1
GO:BP	renal tubule development	GO:0061326	0.723573	0.140518	63	75	1	12400	FGF8
GO:BP	odontogenesis	GO:0042476	0.723573	0.140518	63	75	1	12400	FGF8
GO:BP	determination of bilateral symmetry	GO:0009855	0.723573	0.140518	63	75	1	12400	FGF8
GO:BP	DNA packaging	GO:0006323	0.723573	0.140518	63	75	1	12400	CHAF1B
GO:BP	nervous system process	GO:0050877	0.723573	0.140518	469	75	4	12400	CFAP43,OPN4,RGR,SHISA9
KEGG	Metabolic pathways	KEGG:01100	0.724204	0.140139	909	75	5	12400	LOC100218590,LOC100218933,LOC100219821,LOC100228612,OGDHL
KEGG	MAPK signaling pathway	KEGG:04010	0.725593	0.139307	185	75	1	12400	FGF8
GO:BP	cellular response to oxygen-containing compound	GO:1901701	0.726244	0.138917	473	75	4	12400	GNA11,METTL21C,PPIF,RAB11FIP2
GO:BP	inner ear morphogenesis	GO:0042472	0.726244	0.138917	64	75	1	12400	FGF8
GO:BP	specification of symmetry	GO:0009799	0.726244	0.138917	64	75	1	12400	FGF8
GO:BP	mesoderm development	GO:0007498	0.726244	0.138917	64	75	1	12400	FGF8
GO:BP	cellular response to metal ion	GO:0071248	0.726244	0.138917	64	75	1	12400	PPIF
GO:BP	calcium ion transport	GO:0006816	0.726963	0.138488	192	75	2	12400	LOC100228612,METTL21C
GO:BP	negative regulation of transport	GO:0051051	0.726963	0.138488	192	75	2	12400	LOC100228612,PPIF
GO:BP	response to glucose	GO:0009749	0.727484	0.138177	65	75	1	12400	RAB11FIP2
GO:BP	chloride transport	GO:0006821	0.727484	0.138177	65	75	1	12400	LOC100230461
GO:BP	amino acid transport	GO:0006865	0.727484	0.138177	65	75	1	12400	SFXN2
GO:BP	regulation of DNA repair	GO:0006282	0.727484	0.138177	65	75	1	12400	SHLD2
GO:BP	ureteric bud development	GO:0001657	0.729957	0.136703	66	75	1	12400	FGF8
GO:BP	centrosome cycle	GO:0007098	0.729957	0.136703	66	75	1	12400	KIF11
GO:BP	cellular response to reactive oxygen species	GO:0034614	0.729957	0.136703	66	75	1	12400	PPIF
GO:BP	regulation of adaptive immune response	GO:0002819	0.729957	0.136703	66	75	1	12400	SHLD2
GO:BP	ion transport	GO:0006811	0.729957	0.136703	778	75	6	12400	LOC100228612,LOC100230461,METTL21C,PPIF,SFXN2,SHISA9
GO:CC	leading edge membrane	GO:0031256	0.730546	0.136352	60	75	1	12400	SHISA9
GO:CC	intrinsic component of synaptic membrane	GO:0099240	0.731649	0.135697	62	75	1	12400	SHISA9
GO:CC	intermediate filament cytoskeleton	GO:0045111	0.731649	0.135697	62	75	1	12400	INA
GO:BP	response to monosaccharide	GO:0034284	0.733044	0.13487	67	75	1	12400	RAB11FIP2
GO:BP	mesonephric epithelium development	GO:0072163	0.733044	0.13487	67	75	1	12400	FGF8
GO:BP	mesonephric tubule development	GO:0072164	0.733044	0.13487	67	75	1	12400	FGF8
GO:BP	response to hexose	GO:0009746	0.733044	0.13487	67	75	1	12400	RAB11FIP2
GO:BP	epithelial tube morphogenesis	GO:0060562	0.733044	0.13487	197	75	2	12400	FGF8,GDF2
GO:BP	positive regulation of protein modification process	GO:0031401	0.733248	0.134749	488	75	4	12400	AVPI1,FGF8,GDF2,UBE2D1
GO:BP	negative regulation of cell growth	GO:0030308	0.733248	0.134749	69	75	1	12400	GDF2
GO:BP	mesonephros development	GO:0001823	0.733248	0.134749	68	75	1	12400	FGF8
GO:BP	positive regulation of angiogenesis	GO:0045766	0.733248	0.134749	70	75	1	12400	GDF2
GO:BP	cell growth	GO:0016049	0.733248	0.134749	199	75	2	12400	GDF2,KAZALD1
GO:BP	striated muscle tissue development	GO:0014706	0.733248	0.134749	199	75	2	12400	FGF8,METTL21C
GO:BP	regulation of leukocyte mediated immunity	GO:0002703	0.733248	0.134749	68	75	1	12400	SHLD2
GO:BP	steroid biosynthetic process	GO:0006694	0.733248	0.134749	70	75	1	12400	LOC100218933
GO:BP	regulation of nuclear division	GO:0051783	0.733248	0.134749	69	75	1	12400	FGF8
GO:BP	cellular response to growth factor stimulus	GO:0071363	0.733248	0.134749	345	75	3	12400	FGF8,GDF2,SFRP5
GO:BP	cellular response to inorganic substance	GO:0071241	0.733248	0.134749	70	75	1	12400	PPIF
GO:BP	negative regulation of epithelial cell proliferation	GO:0050680	0.733248	0.134749	69	75	1	12400	GDF2
GO:BP	regulation of animal organ morphogenesis	GO:2000027	0.733248	0.134749	70	75	1	12400	FGF8
GO:BP	cellular response to leukemia inhibitory factor	GO:1990830	0.733248	0.134749	68	75	1	12400	INA
GO:BP	negative regulation of neuron apoptotic process	GO:0043524	0.733248	0.134749	70	75	1	12400	FGF8
GO:BP	cardiac septum development	GO:0003279	0.733248	0.134749	70	75	1	12400	FGF8
GO:BP	ribonucleoprotein complex biogenesis	GO:0022613	0.733248	0.134749	199	75	2	12400	BMS1,EXOSC3
GO:BP	positive regulation of vasculature development	GO:1904018	0.733248	0.134749	70	75	1	12400	GDF2
GO:BP	regulation of endothelial cell proliferation	GO:0001936	0.733248	0.134749	70	75	1	12400	GDF2
GO:BP	response to leukemia inhibitory factor	GO:1990823	0.733248	0.134749	69	75	1	12400	INA
GO:BP	gland morphogenesis	GO:0022612	0.733313	0.134711	71	75	1	12400	FGF8
GO:BP	cilium movement	GO:0003341	0.733313	0.134711	71	75	1	12400	CFAP43
GO:BP	cellular homeostasis	GO:0019725	0.733313	0.134711	346	75	3	12400	LOC100228612,METTL21C,RAB11FIP2
GO:BP	response to temperature stimulus	GO:0009266	0.733313	0.134711	71	75	1	12400	OPN4
GO:BP	endocrine system development	GO:0035270	0.733313	0.134711	71	75	1	12400	FGF8
GO:BP	nephron epithelium development	GO:0072009	0.733313	0.134711	71	75	1	12400	FGF8
GO:BP	transmembrane receptor protein serine/threonine kinase signaling pathway	GO:0007178	0.736926	0.132576	206	75	2	12400	GDF2,SFRP5
GO:BP	cellular metal ion homeostasis	GO:0006875	0.736926	0.132576	206	75	2	12400	LOC100228612,METTL21C
GO:BP	microtubule organizing center organization	GO:0031023	0.736926	0.132576	72	75	1	12400	KIF11
GO:BP	protein-DNA complex subunit organization	GO:0071824	0.736926	0.132576	72	75	1	12400	CHAF1B
KEGG	KEGG root term	KEGG:00000	0.738096	0.131887	3427	75	19	12400	BMS1,FGF8,GDF2,GNA11,LOC100218590,LOC100218933,LOC100219821,LOC100227500,LOC100228612,LOC100230461,OGDHL,POLL,POLR3GL,PPIF,PPP1R3C,RAB11FIP2,SFRP5,SFTPA,UBE2D1
GO:MF	structural molecule activity	GO:0005198	0.743033	0.128992	266	75	2	12400	ADD3,INA
GO:MF	nuclease activity	GO:0004518	0.743033	0.128992	108	75	1	12400	DCLRE1A
GO:MF	helicase activity	GO:0004386	0.743033	0.128992	106	75	1	12400	TWNK
GO:MF	structural molecule activity	GO:0005198	0.743033	0.128992	266	75	2	12400	ADD3,INA
GO:MF	nuclease activity	GO:0004518	0.743033	0.128992	108	75	1	12400	DCLRE1A
GO:MF	helicase activity	GO:0004386	0.743033	0.128992	106	75	1	12400	TWNK
GO:BP	response to carbohydrate	GO:0009743	0.743423	0.128764	73	75	1	12400	RAB11FIP2
GO:BP	response to radiation	GO:0009314	0.743506	0.128715	208	75	2	12400	OPN4,RGR
GO:BP	response to growth factor	GO:0070848	0.744609	0.128072	353	75	3	12400	FGF8,GDF2,SFRP5
GO:BP	spermatid development	GO:0007286	0.746451	0.126999	74	75	1	12400	CFAP43
GO:BP	regulation of synaptic plasticity	GO:0048167	0.746451	0.126999	74	75	1	12400	SHISA9
GO:BP	eye development	GO:0001654	0.746892	0.126742	210	75	2	12400	KERA,OPN4
GO:BP	positive regulation of protein modification by small protein conjugation or removal	GO:1903322	0.746892	0.126742	75	75	1	12400	UBE2D1
GO:BP	production of molecular mediator of immune response	GO:0002440	0.746892	0.126742	75	75	1	12400	SHLD2
GO:BP	visual system development	GO:0150063	0.746892	0.126742	211	75	2	12400	KERA,OPN4
GO:BP	proton transmembrane transport	GO:1902600	0.746892	0.126742	75	75	1	12400	PPIF
GO:BP	spermatid differentiation	GO:0048515	0.746892	0.126742	75	75	1	12400	CFAP43
GO:MF	nucleoside-triphosphatase activity	GO:0017111	0.747712	0.126266	270	75	2	12400	GNA11,KIF11
GO:MF	nucleoside-triphosphatase activity	GO:0017111	0.747712	0.126266	270	75	2	12400	GNA11,KIF11
GO:BP	muscle tissue development	GO:0060537	0.748721	0.12568	213	75	2	12400	FGF8,METTL21C
GO:BP	positive regulation of ERK1 and ERK2 cascade	GO:0070374	0.748721	0.12568	76	75	1	12400	FGF8
GO:BP	positive regulation of protein phosphorylation	GO:0001934	0.748721	0.12568	359	75	3	12400	AVPI1,FGF8,GDF2
GO:BP	ear morphogenesis	GO:0042471	0.748721	0.12568	76	75	1	12400	FGF8
GO:BP	establishment of cell polarity	GO:0030010	0.748721	0.12568	76	75	1	12400	RAB11FIP2
GO:BP	sensory system development	GO:0048880	0.750061	0.124903	214	75	2	12400	KERA,OPN4
GO:BP	cellular response to tumor necrosis factor	GO:0071356	0.750061	0.124903	77	75	1	12400	TNFRSF17
GO:BP	DNA-dependent DNA replication	GO:0006261	0.750061	0.124903	77	75	1	12400	TWNK
GO:BP	peptidyl-lysine methylation	GO:0018022	0.750061	0.124903	77	75	1	12400	METTL21C
GO:BP	phagocytosis	GO:0006909	0.750061	0.124903	77	75	1	12400	RAB11FIP2
GO:MF	cell adhesion molecule binding	GO:0050839	0.751644	0.123988	113	75	1	12400	ANXA7
GO:MF	guanyl nucleotide binding	GO:0019001	0.751644	0.123988	274	75	2	12400	BMS1,GNA11
GO:MF	cell adhesion molecule binding	GO:0050839	0.751644	0.123988	113	75	1	12400	ANXA7
GO:MF	guanyl nucleotide binding	GO:0019001	0.751644	0.123988	274	75	2	12400	BMS1,GNA11
GO:BP	sensory perception	GO:0007600	0.75283	0.123303	216	75	2	12400	OPN4,RGR
GO:BP	regulation of defense response	GO:0031347	0.75283	0.123303	216	75	2	12400	ALOX5,PIK3AP1
GO:BP	cell division	GO:0051301	0.752947	0.123236	217	75	2	12400	FGF8,KIF11
GO:BP	embryonic skeletal system development	GO:0048706	0.752947	0.123236	79	75	1	12400	FGF8
GO:BP	negative regulation of canonical Wnt signaling pathway	GO:0090090	0.752947	0.123236	79	75	1	12400	SFRP5
GO:BP	microtubule-based transport	GO:0099111	0.752947	0.123236	79	75	1	12400	CFAP43
GO:BP	cardiac chamber morphogenesis	GO:0003206	0.752947	0.123236	79	75	1	12400	FGF8
GO:BP	digestive tract development	GO:0048565	0.752947	0.123236	79	75	1	12400	SFRP5
GO:BP	tissue remodeling	GO:0048771	0.752947	0.123236	78	75	1	12400	FGF8
GO:BP	microtubule cytoskeleton organization involved in mitosis	GO:1902850	0.752947	0.123236	79	75	1	12400	KIF11
GO:BP	positive regulation of immune effector process	GO:0002699	0.756709	0.121071	80	75	1	12400	SHLD2
GO:BP	negative regulation of DNA-binding transcription factor activity	GO:0043433	0.756709	0.121071	80	75	1	12400	SFRP5
GO:BP	regulation of hormone levels	GO:0010817	0.756709	0.121071	220	75	2	12400	LOC100218933,RAB11FIP2
GO:BP	regulation of epithelial cell differentiation	GO:0030856	0.758872	0.119832	81	75	1	12400	GDF2
GO:BP	regulation of protein kinase B signaling	GO:0051896	0.758872	0.119832	81	75	1	12400	SFRP5
GO:BP	mitochondrion organization	GO:0007005	0.758872	0.119832	222	75	2	12400	PPIF,PYROXD2
GO:BP	endothelial cell proliferation	GO:0001935	0.758872	0.119832	81	75	1	12400	GDF2
GO:BP	rRNA processing	GO:0006364	0.758872	0.119832	81	75	1	12400	EXOSC3
GO:BP	phosphatidylinositol-mediated signaling	GO:0048015	0.759167	0.119662	82	75	1	12400	PIK3AP1
GO:BP	positive regulation of developmental growth	GO:0048639	0.759167	0.119662	82	75	1	12400	FGF8
GO:BP	embryonic appendage morphogenesis	GO:0035113	0.759167	0.119662	82	75	1	12400	FGF8
GO:BP	organ growth	GO:0035265	0.759167	0.119662	82	75	1	12400	FGF8
GO:BP	embryonic limb morphogenesis	GO:0030326	0.759167	0.119662	82	75	1	12400	FGF8
GO:CC	mitochondrion	GO:0005739	0.760375	0.118972	778	75	6	12400	OGDHL,PPIF,PTCD3,PYROXD2,SFXN2,TWNK
GO:BP	response to tumor necrosis factor	GO:0034612	0.763358	0.117272	85	75	1	12400	TNFRSF17
GO:BP	epithelial tube formation	GO:0072175	0.763358	0.117272	84	75	1	12400	FGF8
GO:BP	insulin secretion	GO:0030073	0.763358	0.117272	85	75	1	12400	RAB11FIP2
GO:BP	inositol lipid-mediated signaling	GO:0048017	0.763358	0.117272	85	75	1	12400	PIK3AP1
GO:BP	pallium development	GO:0021543	0.763358	0.117272	86	75	1	12400	FGF8
GO:BP	regulation of intrinsic apoptotic signaling pathway	GO:2001242	0.763358	0.117272	84	75	1	12400	PPIF
GO:BP	positive regulation of phosphorylation	GO:0042327	0.763358	0.117272	381	75	3	12400	AVPI1,FGF8,GDF2
GO:BP	regulated exocytosis	GO:0045055	0.763358	0.117272	86	75	1	12400	RAB11FIP2
GO:BP	negative regulation of defense response	GO:0031348	0.763358	0.117272	84	75	1	12400	ALOX5
GO:BP	nuclear division	GO:0000280	0.763358	0.117272	228	75	2	12400	FGF8,KIF11
GO:BP	leukocyte chemotaxis	GO:0030595	0.763358	0.117272	85	75	1	12400	ALOX5
GO:BP	response to organic substance	GO:0010033	0.763358	0.117272	1319	75	9	12400	FGF8,GDF2,GNA11,INA,METTL21C,RAB11FIP2,SFR1,SFRP5,TNFRSF17
GO:BP	male sex differentiation	GO:0046661	0.763358	0.117272	83	75	1	12400	FGF8
GO:BP	digestive system development	GO:0055123	0.763358	0.117272	84	75	1	12400	SFRP5
GO:BP	positive regulation of peptidyl-tyrosine phosphorylation	GO:0050731	0.763358	0.117272	84	75	1	12400	FGF8
GO:BP	protein folding	GO:0006457	0.763358	0.117272	85	75	1	12400	PPIF
GO:BP	blood coagulation	GO:0007596	0.763358	0.117272	86	75	1	12400	HPS6
GO:BP	lymphocyte mediated immunity	GO:0002449	0.763358	0.117272	86	75	1	12400	SHLD2
GO:BP	positive regulation of MAPK cascade	GO:0043410	0.763358	0.117272	226	75	2	12400	AVPI1,FGF8
GO:BP	positive regulation of transmembrane transport	GO:0034764	0.763358	0.117272	86	75	1	12400	LOC100228612
KEGG	Neuroactive ligand-receptor interaction	KEGG:04080	0.764381	0.11669	236	75	1	12400	LOC100230461
GO:BP	hemostasis	GO:0007599	0.768938	0.114109	87	75	1	12400	HPS6
GO:MF	signaling receptor binding	GO:0005102	0.769366	0.113867	614	75	4	12400	ANXA7,FGF8,GDF2,GNA11
GO:MF	signaling receptor binding	GO:0005102	0.769366	0.113867	614	75	4	12400	ANXA7,FGF8,GDF2,GNA11
GO:BP	lymphocyte activation involved in immune response	GO:0002285	0.76976	0.113645	88	75	1	12400	SHLD2
GO:BP	rRNA metabolic process	GO:0016072	0.76976	0.113645	88	75	1	12400	EXOSC3
GO:BP	response to reactive oxygen species	GO:0000302	0.76976	0.113645	88	75	1	12400	PPIF
GO:BP	regulation of neuron apoptotic process	GO:0043523	0.76976	0.113645	88	75	1	12400	FGF8
GO:BP	epithelial to mesenchymal transition	GO:0001837	0.76976	0.113645	88	75	1	12400	FGF8
GO:BP	coagulation	GO:0050817	0.77053	0.113211	89	75	1	12400	HPS6
GO:BP	regulation of cell division	GO:0051302	0.77053	0.113211	89	75	1	12400	FGF8
GO:BP	cellular cation homeostasis	GO:0030003	0.77053	0.113211	235	75	2	12400	LOC100228612,METTL21C
GO:BP	monocarboxylic acid biosynthetic process	GO:0072330	0.77053	0.113211	89	75	1	12400	ALOX5
GO:BP	cellular modified amino acid metabolic process	GO:0006575	0.77053	0.113211	89	75	1	12400	LOC100228612
GO:BP	transmembrane transport	GO:0055085	0.771608	0.112604	859	75	6	12400	LOC100228612,LOC100230461,METTL21C,PPIF,SFXN2,SHISA9
GO:BP	inorganic cation transmembrane transport	GO:0098662	0.773561	0.111505	390	75	3	12400	LOC100228612,METTL21C,PPIF
GO:BP	reactive oxygen species metabolic process	GO:0072593	0.773561	0.111505	90	75	1	12400	ALOX5
GO:BP	metal ion homeostasis	GO:0055065	0.775927	0.110179	239	75	2	12400	LOC100228612,METTL21C
GO:BP	nephron development	GO:0072006	0.775927	0.110179	91	75	1	12400	FGF8
GO:BP	inflammatory response	GO:0006954	0.775927	0.110179	239	75	2	12400	ALOX5,PIK3AP1
GO:BP	hormone metabolic process	GO:0042445	0.775927	0.110179	91	75	1	12400	LOC100218933
GO:MF	transition metal ion binding	GO:0046914	0.776334	0.109952	621	75	4	12400	ALOX5,LOC100218933,MARCHF8,ZCCHC24
GO:MF	hydrolase activity, acting on ester bonds	GO:0016788	0.776334	0.109952	456	75	3	12400	DCLRE1A,LOC100218590,LOC105759360
GO:MF	transition metal ion binding	GO:0046914	0.776334	0.109952	621	75	4	12400	ALOX5,LOC100218933,MARCHF8,ZCCHC24
GO:MF	hydrolase activity, acting on ester bonds	GO:0016788	0.776334	0.109952	456	75	3	12400	DCLRE1A,LOC100218590,LOC105759360
GO:MF	ATPase, acting on DNA	GO:0008094	0.778355	0.108822	126	75	1	12400	TWNK
GO:MF	phosphoprotein phosphatase activity	GO:0004721	0.778355	0.108822	125	75	1	12400	LOC105759360
GO:MF	ubiquitin protein ligase activity	GO:0061630	0.778355	0.108822	124	75	1	12400	UBE2D1
GO:MF	ATPase, acting on DNA	GO:0008094	0.778355	0.108822	126	75	1	12400	TWNK
GO:MF	phosphoprotein phosphatase activity	GO:0004721	0.778355	0.108822	125	75	1	12400	LOC105759360
GO:MF	ubiquitin protein ligase activity	GO:0061630	0.778355	0.108822	124	75	1	12400	UBE2D1
GO:BP	negative regulation of neuron death	GO:1901215	0.779428	0.108224	92	75	1	12400	FGF8
GO:BP	neural precursor cell proliferation	GO:0061351	0.779428	0.108224	92	75	1	12400	FGF8
GO:BP	ameboidal-type cell migration	GO:0001667	0.780041	0.107882	241	75	2	12400	FGF8,GDF2
GO:BP	kidney epithelium development	GO:0072073	0.781109	0.107288	93	75	1	12400	FGF8
GO:BP	spindle organization	GO:0007051	0.781109	0.107288	93	75	1	12400	KIF11
GO:BP	hormone-mediated signaling pathway	GO:0009755	0.781109	0.107288	93	75	1	12400	METTL21C
GO:BP	cellular ion homeostasis	GO:0006873	0.782934	0.106275	243	75	2	12400	LOC100228612,METTL21C
GO:MF	amide binding	GO:0033218	0.783513	0.105954	129	75	1	12400	PPIF
GO:MF	microtubule binding	GO:0008017	0.783513	0.105954	131	75	1	12400	KIF11
GO:MF	ubiquitin-like protein ligase activity	GO:0061659	0.783513	0.105954	131	75	1	12400	UBE2D1
GO:MF	amide binding	GO:0033218	0.783513	0.105954	129	75	1	12400	PPIF
GO:MF	microtubule binding	GO:0008017	0.783513	0.105954	131	75	1	12400	KIF11
GO:MF	ubiquitin-like protein ligase activity	GO:0061659	0.783513	0.105954	131	75	1	12400	UBE2D1
GO:BP	skeletal muscle tissue development	GO:0007519	0.783885	0.105748	94	75	1	12400	METTL21C
GO:BP	carbohydrate biosynthetic process	GO:0016051	0.783885	0.105748	94	75	1	12400	PPP1R3C
GO:BP	morphogenesis of embryonic epithelium	GO:0016331	0.784676	0.10531	95	75	1	12400	FGF8
GO:BP	appendage morphogenesis	GO:0035107	0.784676	0.10531	96	75	1	12400	FGF8
GO:BP	cellular response to organic cyclic compound	GO:0071407	0.784676	0.10531	247	75	2	12400	GNA11,METTL21C
GO:BP	cellular response to hormone stimulus	GO:0032870	0.784676	0.10531	245	75	2	12400	METTL21C,SFR1
GO:BP	cellular ketone metabolic process	GO:0042180	0.784676	0.10531	96	75	1	12400	LOC100218933
GO:BP	gastrulation	GO:0007369	0.784676	0.10531	96	75	1	12400	FGF8
GO:BP	negative regulation of Wnt signaling pathway	GO:0030178	0.784676	0.10531	96	75	1	12400	SFRP5
GO:BP	tube formation	GO:0035148	0.784676	0.10531	95	75	1	12400	FGF8
GO:BP	limb morphogenesis	GO:0035108	0.784676	0.10531	96	75	1	12400	FGF8
GO:BP	metal ion transport	GO:0030001	0.784676	0.10531	246	75	2	12400	LOC100228612,METTL21C
GO:BP	protein kinase B signaling	GO:0043491	0.786139	0.1045	97	75	1	12400	SFRP5
GO:BP	cellular response to steroid hormone stimulus	GO:0071383	0.786139	0.1045	97	75	1	12400	METTL21C
GO:BP	establishment or maintenance of cell polarity	GO:0007163	0.786139	0.1045	97	75	1	12400	RAB11FIP2
GO:BP	positive regulation of ion transport	GO:0043270	0.786139	0.1045	97	75	1	12400	LOC100228612
GO:BP	developmental process involved in reproduction	GO:0003006	0.788681	0.103099	407	75	3	12400	CFAP43,FGF8,LOC100218933
GO:BP	skeletal muscle organ development	GO:0060538	0.788681	0.103099	98	75	1	12400	METTL21C
GO:BP	positive regulation of epithelial cell proliferation	GO:0050679	0.788681	0.103099	98	75	1	12400	GDF2
GO:BP	RNA modification	GO:0009451	0.793431	0.100491	99	75	1	12400	TRUB1
GO:BP	positive regulation of MAP kinase activity	GO:0043406	0.794723	0.0997845	100	75	1	12400	AVPI1
GO:BP	organelle fission	GO:0048285	0.794723	0.0997845	253	75	2	12400	FGF8,KIF11
GO:BP	adaptive immune response based on somatic recombination of immune receptors built from immunoglobulin superfamily domains	GO:0002460	0.794723	0.0997845	100	75	1	12400	SHLD2
GO:BP	positive regulation of cell population proliferation	GO:0008284	0.794723	0.0997845	411	75	3	12400	FGF8,GDF2,HPSE2
GO:MF	pyrophosphatase activity	GO:0016462	0.796757	0.0986742	310	75	2	12400	GNA11,KIF11
GO:MF	pyrophosphatase activity	GO:0016462	0.796757	0.0986742	310	75	2	12400	GNA11,KIF11
GO:BP	cation transport	GO:0006812	0.800193	0.0968051	574	75	4	12400	LOC100228612,METTL21C,PPIF,SHISA9
GO:MF	protein kinase binding	GO:0019901	0.801233	0.0962413	320	75	2	12400	KIF11,RAB11FIP2
GO:MF	hydrolase activity, acting on acid anhydrides, in phosphorus-containing anhydrides	GO:0016818	0.801233	0.0962413	319	75	2	12400	GNA11,KIF11
GO:MF	hydrolase activity, acting on acid anhydrides	GO:0016817	0.801233	0.0962413	320	75	2	12400	GNA11,KIF11
GO:MF	transcription coactivator activity	GO:0003713	0.801233	0.0962413	139	75	1	12400	SFR1
GO:MF	protein kinase binding	GO:0019901	0.801233	0.0962413	320	75	2	12400	KIF11,RAB11FIP2
GO:MF	hydrolase activity, acting on acid anhydrides, in phosphorus-containing anhydrides	GO:0016818	0.801233	0.0962413	319	75	2	12400	GNA11,KIF11
GO:MF	hydrolase activity, acting on acid anhydrides	GO:0016817	0.801233	0.0962413	320	75	2	12400	GNA11,KIF11
GO:MF	transcription coactivator activity	GO:0003713	0.801233	0.0962413	139	75	1	12400	SFR1
GO:BP	neural tube development	GO:0021915	0.801674	0.0960022	102	75	1	12400	FGF8
GO:BP	protein processing	GO:0016485	0.801674	0.0960022	102	75	1	12400	PLAU
GO:BP	cardiac chamber development	GO:0003205	0.801674	0.0960022	102	75	1	12400	FGF8
GO:BP	circadian rhythm	GO:0007623	0.801749	0.0959615	103	75	1	12400	OPN4
GO:BP	positive regulation of phosphorus metabolic process	GO:0010562	0.801749	0.0959615	418	75	3	12400	AVPI1,FGF8,GDF2
GO:BP	positive regulation of phosphate metabolic process	GO:0045937	0.801749	0.0959615	418	75	3	12400	AVPI1,FGF8,GDF2
GO:BP	inorganic ion transmembrane transport	GO:0098660	0.801749	0.0959615	418	75	3	12400	LOC100228612,METTL21C,PPIF
GO:BP	negative regulation of growth	GO:0045926	0.801749	0.0959615	103	75	1	12400	GDF2
GO:BP	inorganic anion transport	GO:0015698	0.805009	0.0941992	104	75	1	12400	LOC100230461
GO:BP	positive regulation of DNA metabolic process	GO:0051054	0.805009	0.0941992	104	75	1	12400	SHLD2
GO:BP	positive regulation of lymphocyte activation	GO:0051251	0.809426	0.0918228	105	75	1	12400	SHLD2
GO:CC	cluster of actin-based cell projections	GO:0098862	0.80984	0.0916009	74	75	1	12400	ADD3
GO:CC	supramolecular polymer	GO:0099081	0.80984	0.0916009	361	75	3	12400	INA,KIF11,LDB3
GO:CC	sarcomere	GO:0030017	0.80984	0.0916009	77	75	1	12400	LDB3
GO:CC	plasma membrane bounded cell projection cytoplasm	GO:0032838	0.80984	0.0916009	76	75	1	12400	CFAP43
GO:CC	supramolecular fiber	GO:0099512	0.80984	0.0916009	355	75	3	12400	INA,KIF11,LDB3
GO:MF	enzyme binding	GO:0019899	0.810151	0.0914338	1021	75	6	12400	GOLGA7B,HPS6,KIF11,PPP1R3C,RAB11FIP2,TWNK
GO:MF	enzyme binding	GO:0019899	0.810151	0.0914338	1021	75	6	12400	GOLGA7B,HPS6,KIF11,PPP1R3C,RAB11FIP2,TWNK
GO:BP	cardiac muscle tissue development	GO:0048738	0.813797	0.0894837	106	75	1	12400	FGF8
GO:BP	response to metal ion	GO:0010038	0.818124	0.0871811	107	75	1	12400	PPIF
GO:BP	peptide hormone secretion	GO:0030072	0.818629	0.0869126	108	75	1	12400	RAB11FIP2
GO:BP	osteoblast differentiation	GO:0001649	0.818629	0.0869126	108	75	1	12400	GDF2
GO:BP	lung development	GO:0030324	0.818629	0.0869126	108	75	1	12400	FGF8
GO:BP	regulation of endothelial cell migration	GO:0010594	0.818629	0.0869126	108	75	1	12400	GDF2
GO:BP	taxis	GO:0042330	0.818629	0.0869126	267	75	2	12400	ALOX5,OPN4
GO:BP	angiogenesis	GO:0001525	0.820832	0.0857458	268	75	2	12400	FGF8,GDF2
GO:BP	positive regulation of cell cycle process	GO:0090068	0.821294	0.0855012	111	75	1	12400	FGF8
GO:BP	regulation of response to DNA damage stimulus	GO:2001020	0.821294	0.0855012	111	75	1	12400	SHLD2
GO:BP	protein methylation	GO:0006479	0.821294	0.0855012	110	75	1	12400	METTL21C
GO:BP	regulation of immune effector process	GO:0002697	0.821294	0.0855012	111	75	1	12400	SHLD2
GO:BP	response to steroid hormone	GO:0048545	0.821294	0.0855012	110	75	1	12400	METTL21C
GO:BP	peptide secretion	GO:0002790	0.821294	0.0855012	110	75	1	12400	RAB11FIP2
GO:BP	protein alkylation	GO:0008213	0.821294	0.0855012	110	75	1	12400	METTL21C
GO:BP	neuron apoptotic process	GO:0051402	0.821294	0.0855012	111	75	1	12400	FGF8
GO:BP	respiratory tube development	GO:0030323	0.821294	0.0855012	111	75	1	12400	FGF8
GO:BP	leukocyte mediated immunity	GO:0002443	0.821294	0.0855012	111	75	1	12400	SHLD2
GO:BP	leukocyte activation involved in immune response	GO:0002366	0.823754	0.0842023	113	75	1	12400	SHLD2
GO:BP	nucleic acid phosphodiester bond hydrolysis	GO:0090305	0.823754	0.0842023	113	75	1	12400	DCLRE1A
GO:BP	cartilage development	GO:0051216	0.823754	0.0842023	112	75	1	12400	GDF2
GO:BP	limb development	GO:0060173	0.823754	0.0842023	113	75	1	12400	FGF8
GO:BP	gonad development	GO:0008406	0.823754	0.0842023	113	75	1	12400	FGF8
GO:BP	appendage development	GO:0048736	0.823754	0.0842023	113	75	1	12400	FGF8
GO:BP	negative regulation of apoptotic signaling pathway	GO:2001234	0.823754	0.0842023	112	75	1	12400	PPIF
GO:MF	guanyl-nucleotide exchange factor activity	GO:0005085	0.824437	0.0838426	152	75	1	12400	KNDC1
GO:MF	guanyl-nucleotide exchange factor activity	GO:0005085	0.824437	0.0838426	152	75	1	12400	KNDC1
GO:MF	anion transmembrane transporter activity	GO:0008509	0.829257	0.081311	155	75	1	12400	LOC100230461
GO:MF	anion transmembrane transporter activity	GO:0008509	0.829257	0.081311	155	75	1	12400	LOC100230461
GO:BP	adaptive immune response	GO:0002250	0.829382	0.0812455	115	75	1	12400	SHLD2
GO:BP	carbohydrate homeostasis	GO:0033500	0.829382	0.0812455	115	75	1	12400	RAB11FIP2
GO:BP	response to stimulus	GO:0050896	0.829382	0.0812455	4064	75	25	12400	ADGRA1,ALOX5,ARHGAP19,AVPI1,DCLRE1A,EXOSC3,FGF8,GDF2,GNA11,HPS6,INA,KNDC1,LOC100228612,METTL21C,OPN4,PIK3AP1,POLL,PPIF,RAB11FIP2,RGR,SFR1,SFRP5,SHISA9,SHLD2,TNFRSF17
GO:BP	glucose homeostasis	GO:0042593	0.829382	0.0812455	115	75	1	12400	RAB11FIP2
GO:BP	cell activation involved in immune response	GO:0002263	0.831489	0.0801433	116	75	1	12400	SHLD2
GO:BP	B cell activation	GO:0042113	0.831489	0.0801433	116	75	1	12400	SHLD2
GO:BP	negative regulation of intracellular signal transduction	GO:1902532	0.831489	0.0801433	280	75	2	12400	PPIF,SFRP5
GO:BP	positive regulation of leukocyte activation	GO:0002696	0.831489	0.0801433	117	75	1	12400	SHLD2
GO:BP	inner ear development	GO:0048839	0.831489	0.0801433	117	75	1	12400	FGF8
GO:BP	development of primary sexual characteristics	GO:0045137	0.831489	0.0801433	117	75	1	12400	FGF8
GO:BP	cation homeostasis	GO:0055080	0.831489	0.0801433	281	75	2	12400	LOC100228612,METTL21C
GO:BP	monosaccharide metabolic process	GO:0005996	0.833037	0.0793357	118	75	1	12400	LOC100228612
GO:BP	regulation of protein ubiquitination	GO:0031396	0.833037	0.0793357	118	75	1	12400	UBE2D1
GO:BP	positive regulation of intracellular signal transduction	GO:1902533	0.833037	0.0793357	448	75	3	12400	AVPI1,FGF8,PIK3AP1
GO:MF	molecular_function	GO:0003674	0.833489	0.0791001	9676	75	58	12400	ADD3,ADGRA1,ALOX5,ANKRD2,ANKRD22,ANXA7,BMS1,CFAP43,CHAF1B,COMTD1,DCLRE1A,EXOSC3,FGF8,GDF2,GNA11,GOLGA7B,HPS6,HPSE2,INA,KAZALD1,KERA,KIF11,KNDC1,LDB3,LOC100218590,LOC100218933,LOC100219821,LOC100228612,LOC100229828,LOC100230461,LOC105759360,LRMDA,MARCHF8,METTL21C,OGDHL,OPN4,PIK3AP1,PLAU,POLL,PPIF,PPP1R3C,PTCD3,PYROXD2,RAB11FIP2,RBP3,RGR,SAMD8,SFR1,SFRP5,SFXN2,SHISA9,SORCS1,TNFRSF17,TRUB1,TWNK,UBE2…
GO:MF	protein-containing complex binding	GO:0044877	0.833489	0.0791001	526	75	3	12400	ANXA7,GNA11,PTCD3
GO:MF	molecular_function	GO:0003674	0.833489	0.0791001	9676	75	58	12400	ADD3,ADGRA1,ALOX5,ANKRD2,ANKRD22,ANXA7,BMS1,CFAP43,CHAF1B,COMTD1,DCLRE1A,EXOSC3,FGF8,GDF2,GNA11,GOLGA7B,HPS6,HPSE2,INA,KAZALD1,KERA,KIF11,KNDC1,LDB3,LOC100218590,LOC100218933,LOC100219821,LOC100228612,LOC100229828,LOC100230461,LOC105759360,LRMDA,MARCHF8,METTL21C,OGDHL,OPN4,PIK3AP1,PLAU,POLL,PPIF,PPP1R3C,PTCD3,PYROXD2,RAB11FIP2,RBP3,RGR,SAMD8,SFR1,SFRP5,SFXN2,SHISA9,SORCS1,TNFRSF17,TRUB1,TWNK,UBE2…
GO:MF	protein-containing complex binding	GO:0044877	0.833489	0.0791001	526	75	3	12400	ANXA7,GNA11,PTCD3
GO:CC	spindle pole	GO:0000922	0.835137	0.0782425	84	75	1	12400	KIF11
GO:CC	motile cilium	GO:0031514	0.835137	0.0782425	82	75	1	12400	CFAP43
GO:CC	plasma membrane signaling receptor complex	GO:0098802	0.835137	0.0782425	85	75	1	12400	SHISA9
GO:CC	mitotic spindle	GO:0072686	0.835137	0.0782425	85	75	1	12400	KIF11
GO:BP	ATP metabolic process	GO:0046034	0.835571	0.0780169	119	75	1	12400	PPIF
GO:BP	apoptotic signaling pathway	GO:0097190	0.835571	0.0780169	285	75	2	12400	METTL21C,PPIF
GO:BP	response to hormone	GO:0009725	0.835571	0.0780169	286	75	2	12400	METTL21C,SFR1
GO:BP	regulation of ERK1 and ERK2 cascade	GO:0070372	0.835571	0.0780169	120	75	1	12400	FGF8
GO:BP	steroid metabolic process	GO:0008202	0.835571	0.0780169	120	75	1	12400	LOC100218933
GO:BP	regulation of peptidyl-tyrosine phosphorylation	GO:0050730	0.835571	0.0780169	120	75	1	12400	FGF8
GO:BP	positive regulation of cell activation	GO:0050867	0.835571	0.0780169	120	75	1	12400	SHLD2
GO:BP	morphogenesis of an epithelium	GO:0002009	0.836336	0.0776191	287	75	2	12400	FGF8,GDF2
GO:BP	positive regulation of growth	GO:0045927	0.836336	0.0776191	121	75	1	12400	FGF8
GO:BP	anterior/posterior pattern specification	GO:0009952	0.836336	0.0776191	121	75	1	12400	FGF8
GO:MF	ATPase	GO:0016887	0.838289	0.0766064	350	75	2	12400	KIF11,TWNK
GO:MF	ATPase	GO:0016887	0.838289	0.0766064	350	75	2	12400	KIF11,TWNK
GO:BP	respiratory system development	GO:0060541	0.840166	0.0756347	123	75	1	12400	FGF8
GO:BP	cell chemotaxis	GO:0060326	0.840166	0.0756347	123	75	1	12400	ALOX5
GO:BP	inorganic ion homeostasis	GO:0098771	0.840166	0.0756347	289	75	2	12400	LOC100228612,METTL21C
GO:BP	response to oxygen-containing compound	GO:1901700	0.840166	0.0756347	624	75	4	12400	GNA11,METTL21C,PPIF,RAB11FIP2
GO:BP	activation of protein kinase activity	GO:0032147	0.840166	0.0756347	123	75	1	12400	AVPI1
GO:BP	muscle structure development	GO:0061061	0.840552	0.0754354	292	75	2	12400	FGF8,METTL21C
GO:BP	growth	GO:0040007	0.840552	0.0754354	460	75	3	12400	FGF8,GDF2,KAZALD1
GO:BP	regulation of intracellular signal transduction	GO:1902531	0.840552	0.0754354	795	75	5	12400	AVPI1,FGF8,PIK3AP1,PPIF,SFRP5
GO:BP	peptide transport	GO:0015833	0.840552	0.0754354	124	75	1	12400	RAB11FIP2
GO:CC	secretory granule	GO:0030141	0.846211	0.0725213	97	75	1	12400	ANXA7
GO:CC	fibrillar center	GO:0001650	0.846211	0.0725213	93	75	1	12400	DCLRE1A
GO:CC	somatodendritic compartment	GO:0036477	0.846211	0.0725213	245	75	2	12400	LOC100218933,SHISA9
GO:CC	contractile fiber	GO:0043292	0.846211	0.0725213	91	75	1	12400	LDB3
GO:CC	synapse	GO:0045202	0.846211	0.0725213	551	75	4	12400	ADD3,INA,LOC100230461,SHISA9
GO:CC	collagen-containing extracellular matrix	GO:0062023	0.846211	0.0725213	95	75	1	12400	KAZALD1
GO:CC	cytoplasmic region	GO:0099568	0.846211	0.0725213	96	75	1	12400	CFAP43
GO:CC	myofibril	GO:0030016	0.846211	0.0725213	88	75	1	12400	LDB3
GO:BP	positive regulation of organelle organization	GO:0010638	0.847251	0.0719877	295	75	2	12400	FGF8,PPIF
GO:BP	regulation of neuron death	GO:1901214	0.847251	0.0719877	126	75	1	12400	FGF8
GO:BP	heart development	GO:0007507	0.848738	0.0712262	296	75	2	12400	FGF8,GNA11
GO:BP	mesenchymal cell differentiation	GO:0048762	0.849534	0.0708191	127	75	1	12400	FGF8
GO:BP	cellular response to oxidative stress	GO:0034599	0.851779	0.0696733	128	75	1	12400	PPIF
GO:BP	germ cell development	GO:0007281	0.851779	0.0696733	128	75	1	12400	CFAP43
GO:BP	response to abiotic stimulus	GO:0009628	0.854682	0.0681954	470	75	3	12400	GNA11,OPN4,RGR
GO:BP	regulation of microtubule-based process	GO:0032886	0.854682	0.0681954	129	75	1	12400	CFAP43
GO:BP	negative regulation of cell migration	GO:0030336	0.856153	0.0674485	130	75	1	12400	GDF2
GO:BP	bone development	GO:0060348	0.856153	0.0674485	130	75	1	12400	FGF8
GO:MF	lipid binding	GO:0008289	0.856654	0.0671945	362	75	2	12400	ANXA7,OPN4
GO:MF	kinase binding	GO:0019900	0.856654	0.0671945	364	75	2	12400	KIF11,RAB11FIP2
GO:MF	lipid binding	GO:0008289	0.856654	0.0671945	362	75	2	12400	ANXA7,OPN4
GO:MF	kinase binding	GO:0019900	0.856654	0.0671945	364	75	2	12400	KIF11,RAB11FIP2
GO:BP	organic acid transport	GO:0015849	0.858284	0.0663688	131	75	1	12400	SFXN2
GO:BP	ERK1 and ERK2 cascade	GO:0070371	0.858284	0.0663688	131	75	1	12400	FGF8
GO:BP	endothelial cell migration	GO:0043542	0.861475	0.0647574	132	75	1	12400	GDF2
GO:BP	tube morphogenesis	GO:0035239	0.86168	0.0646539	476	75	3	12400	FGF8,GDF2,SFRP5
GO:BP	ear development	GO:0043583	0.865555	0.0627055	134	75	1	12400	FGF8
GO:BP	telencephalon development	GO:0021537	0.865555	0.0627055	134	75	1	12400	FGF8
GO:BP	response to organic cyclic compound	GO:0014070	0.865555	0.0627055	307	75	2	12400	GNA11,METTL21C
GO:BP	ion homeostasis	GO:0050801	0.866163	0.0624005	308	75	2	12400	LOC100228612,METTL21C
GO:BP	negative regulation of cell motility	GO:2000146	0.869222	0.0608694	137	75	1	12400	GDF2
GO:BP	cell fate commitment	GO:0045165	0.869222	0.0608694	136	75	1	12400	FGF8
GO:BP	protein maturation	GO:0051604	0.869222	0.0608694	136	75	1	12400	PLAU
GO:BP	positive regulation of protein serine/threonine kinase activity	GO:0071902	0.869222	0.0608694	137	75	1	12400	AVPI1
GO:BP	cellular carbohydrate metabolic process	GO:0044262	0.869222	0.0608694	136	75	1	12400	PPP1R3C
GO:BP	microtubule cytoskeleton organization	GO:0000226	0.869222	0.0608694	311	75	2	12400	CFAP43,KIF11
GO:BP	regulation of angiogenesis	GO:0045765	0.869222	0.0608694	137	75	1	12400	GDF2
GO:BP	hormone secretion	GO:0046879	0.872196	0.0593858	138	75	1	12400	RAB11FIP2
GO:BP	carboxylic acid biosynthetic process	GO:0046394	0.876768	0.0571152	140	75	1	12400	ALOX5
GO:BP	chemical homeostasis	GO:0048878	0.876768	0.0571152	491	75	3	12400	LOC100228612,METTL21C,RAB11FIP2
GO:BP	regulation of vasculature development	GO:1901342	0.876768	0.0571152	140	75	1	12400	GDF2
GO:BP	organic acid biosynthetic process	GO:0016053	0.876768	0.0571152	142	75	1	12400	ALOX5
GO:BP	rhythmic process	GO:0048511	0.876768	0.0571152	143	75	1	12400	OPN4
GO:BP	hormone transport	GO:0009914	0.876768	0.0571152	142	75	1	12400	RAB11FIP2
GO:BP	regulation of canonical Wnt signaling pathway	GO:0060828	0.876768	0.0571152	141	75	1	12400	SFRP5
GO:BP	cellular response to abiotic stimulus	GO:0071214	0.876768	0.0571152	143	75	1	12400	GNA11
GO:BP	cellular response to environmental stimulus	GO:0104004	0.876768	0.0571152	143	75	1	12400	GNA11
GO:BP	heart morphogenesis	GO:0003007	0.876768	0.0571152	143	75	1	12400	FGF8
GO:BP	negative regulation of locomotion	GO:0040013	0.876768	0.0571152	143	75	1	12400	GDF2
GO:BP	negative regulation of cellular component movement	GO:0051271	0.876768	0.0571152	142	75	1	12400	GDF2
GO:BP	regulation of protein modification by small protein conjugation or removal	GO:1903320	0.876768	0.0571152	143	75	1	12400	UBE2D1
GO:BP	amide transport	GO:0042886	0.876768	0.0571152	140	75	1	12400	RAB11FIP2
GO:BP	regulation of cell cycle process	GO:0010564	0.876963	0.057019	323	75	2	12400	FGF8,KIF11
GO:BP	skeletal system morphogenesis	GO:0048705	0.876963	0.057019	144	75	1	12400	FGF8
GO:BP	positive regulation of cellular protein metabolic process	GO:0032270	0.876963	0.057019	671	75	4	12400	AVPI1,FGF8,GDF2,UBE2D1
GO:BP	leukocyte migration	GO:0050900	0.876963	0.057019	144	75	1	12400	ALOX5
GO:BP	regulation of body fluid levels	GO:0050878	0.876963	0.057019	145	75	1	12400	HPS6
GO:BP	lipid biosynthetic process	GO:0008610	0.876963	0.057019	324	75	2	12400	ALOX5,LOC100218933
GO:BP	regulation of epithelial cell migration	GO:0010632	0.876963	0.057019	145	75	1	12400	GDF2
GO:MF	catalytic activity, acting on a protein	GO:0140096	0.877243	0.0568799	1460	75	8	12400	LOC100229828,LOC105759360,MARCHF8,METTL21C,PLAU,PPIF,RBP3,UBE2D1
GO:MF	catalytic activity, acting on a protein	GO:0140096	0.877243	0.0568799	1460	75	8	12400	LOC100229828,LOC105759360,MARCHF8,METTL21C,PLAU,PPIF,RBP3,UBE2D1
GO:BP	negative regulation of molecular function	GO:0044092	0.877446	0.0567795	501	75	3	12400	LOC100228612,PPIF,SFRP5
GO:BP	protein complex oligomerization	GO:0051259	0.877446	0.0567795	146	75	1	12400	TWNK
GO:BP	regulation of MAP kinase activity	GO:0043405	0.877446	0.0567795	146	75	1	12400	AVPI1
GO:BP	regulation of MAPK cascade	GO:0043408	0.877724	0.0566419	326	75	2	12400	AVPI1,FGF8
GO:BP	negative regulation of cell population proliferation	GO:0008285	0.879157	0.0559336	327	75	2	12400	GDF2,SFRP5
GO:BP	blood vessel morphogenesis	GO:0048514	0.883058	0.0540106	329	75	2	12400	FGF8,GDF2
GO:BP	positive regulation of gene expression	GO:0010628	0.883845	0.0536237	509	75	3	12400	FGF8,GDF2,SHLD2
GO:BP	neuron death	GO:0070997	0.883845	0.0536237	150	75	1	12400	FGF8
GO:BP	cellular response to chemical stress	GO:0062197	0.883845	0.0536237	150	75	1	12400	PPIF
GO:BP	establishment of protein localization to extracellular region	GO:0035592	0.883845	0.0536237	150	75	1	12400	RAB11FIP2
GO:BP	protein secretion	GO:0009306	0.883845	0.0536237	150	75	1	12400	RAB11FIP2
GO:BP	mesenchyme development	GO:0060485	0.885521	0.0528012	152	75	1	12400	FGF8
GO:BP	intrinsic apoptotic signaling pathway	GO:0097193	0.885521	0.0528012	151	75	1	12400	PPIF
GO:BP	positive regulation of cell cycle	GO:0045787	0.885521	0.0528012	152	75	1	12400	FGF8
GO:BP	enzyme linked receptor protein signaling pathway	GO:0007167	0.885521	0.0528012	511	75	3	12400	FGF8,GDF2,SFRP5
GO:BP	negative regulation of response to external stimulus	GO:0032102	0.885521	0.0528012	152	75	1	12400	ALOX5
GO:BP	connective tissue development	GO:0061448	0.888004	0.0515852	153	75	1	12400	GDF2
GO:MF	tubulin binding	GO:0015631	0.888464	0.0513602	188	75	1	12400	KIF11
GO:MF	tubulin binding	GO:0015631	0.888464	0.0513602	188	75	1	12400	KIF11
GO:BP	exocytosis	GO:0006887	0.889397	0.0509044	154	75	1	12400	RAB11FIP2
GO:BP	protein localization to extracellular region	GO:0071692	0.889397	0.0509044	154	75	1	12400	RAB11FIP2
GO:CC	polymeric cytoskeletal fiber	GO:0099513	0.891249	0.050001	263	75	2	12400	INA,KIF11
GO:MF	phosphatase activity	GO:0016791	0.893333	0.0489868	192	75	1	12400	LOC105759360
GO:MF	phosphatase activity	GO:0016791	0.893333	0.0489868	192	75	1	12400	LOC105759360
GO:BP	sulfur compound metabolic process	GO:0006790	0.897665	0.0468859	157	75	1	12400	LOC100228612
GO:BP	regulation of developmental growth	GO:0048638	0.897665	0.0468859	157	75	1	12400	FGF8
GO:MF	GTPase activity	GO:0003924	0.90029	0.0456174	197	75	1	12400	GNA11
GO:MF	GTPase activity	GO:0003924	0.90029	0.0456174	197	75	1	12400	GNA11
GO:CC	cytoplasmic ribonucleoprotein granule	GO:0036464	0.901982	0.0448023	109	75	1	12400	INA
GO:BP	homeostasis of number of cells	GO:0048872	0.903108	0.0442605	159	75	1	12400	TNFRSF17
GO:BP	tissue morphogenesis	GO:0048729	0.903108	0.0442605	345	75	2	12400	FGF8,GDF2
GO:BP	cellular response to cytokine stimulus	GO:0071345	0.903267	0.0441837	346	75	2	12400	INA,TNFRSF17
GO:BP	brain development	GO:0007420	0.903267	0.0441837	346	75	2	12400	CFAP43,FGF8
GO:MF	RNA binding	GO:0003723	0.903861	0.0438983	597	75	3	12400	EXOSC3,PTCD3,TRUB1
GO:MF	RNA binding	GO:0003723	0.903861	0.0438983	597	75	3	12400	EXOSC3,PTCD3,TRUB1
GO:BP	locomotion	GO:0040011	0.904349	0.0436641	882	75	5	12400	ALOX5,CFAP43,FGF8,GDF2,OPN4
GO:BP	cytokine-mediated signaling pathway	GO:0019221	0.904759	0.0434672	161	75	1	12400	TNFRSF17
GO:BP	positive regulation of protein metabolic process	GO:0051247	0.910438	0.0407496	711	75	4	12400	AVPI1,FGF8,GDF2,UBE2D1
GO:BP	wound healing	GO:0042060	0.912485	0.0397744	164	75	1	12400	HPS6
GO:CC	cation channel complex	GO:0034703	0.912701	0.0396714	119	75	1	12400	SHISA9
GO:CC	mitochondrial envelope	GO:0005740	0.912701	0.0396714	279	75	2	12400	PPIF,SFXN2
GO:CC	ribonucleoprotein granule	GO:0035770	0.912701	0.0396714	118	75	1	12400	INA
GO:CC	chromatin	GO:0000785	0.912701	0.0396714	278	75	2	12400	CHAF1B,SFR1
GO:CC	cell projection membrane	GO:0031253	0.912701	0.0396714	119	75	1	12400	SHISA9
GO:BP	positive regulation of signal transduction	GO:0009967	0.913115	0.0394745	714	75	4	12400	AVPI1,FGF8,GDF2,PIK3AP1
GO:CC	mitochondrial protein-containing complex	GO:0098798	0.91434	0.0388925	121	75	1	12400	PPIF
GO:BP	mitotic cell cycle process	GO:1903047	0.914898	0.0386275	354	75	2	12400	FGF8,KIF11
GO:CC	neuronal cell body	GO:0043025	0.918354	0.0369898	125	75	1	12400	LOC100218933
GO:CC	cell cortex	GO:0005938	0.918354	0.0369898	126	75	1	12400	ADD3
GO:CC	condensed chromosome	GO:0000793	0.918354	0.0369898	127	75	1	12400	ADD3
GO:BP	sensory organ morphogenesis	GO:0090596	0.925251	0.0337404	169	75	1	12400	FGF8
GO:BP	signal transduction	GO:0007165	0.9253	0.0337175	2797	75	16	12400	ADGRA1,ARHGAP19,AVPI1,FGF8,GDF2,GNA11,KNDC1,METTL21C,OPN4,PIK3AP1,PPIF,RAB11FIP2,RGR,SFRP5,SHISA9,TNFRSF17
GO:CC	envelope	GO:0031975	0.928583	0.0321791	484	75	3	12400	ALOX5,PPIF,SFXN2
GO:CC	organelle envelope	GO:0031967	0.928583	0.0321791	484	75	3	12400	ALOX5,PPIF,SFXN2
GO:CC	nuclear membrane	GO:0031965	0.928583	0.0321791	135	75	1	12400	ALOX5
GO:CC	ribosome	GO:0005840	0.928583	0.0321791	136	75	1	12400	PTCD3
GO:BP	cellular process involved in reproduction in multicellular organism	GO:0022412	0.929326	0.0318321	171	75	1	12400	CFAP43
GO:MF	gated channel activity	GO:0022836	0.930169	0.0314379	215	75	1	12400	LOC100230461
GO:MF	gated channel activity	GO:0022836	0.930169	0.0314379	215	75	1	12400	LOC100230461
GO:BP	MAPK cascade	GO:0000165	0.932322	0.0304343	365	75	2	12400	AVPI1,FGF8
GO:BP	macromolecule methylation	GO:0043414	0.932322	0.0304343	173	75	1	12400	METTL21C
GO:BP	cilium assembly	GO:0060271	0.932322	0.0304343	173	75	1	12400	CFAP43
GO:CC	nucleolus	GO:0005730	0.934193	0.0295634	501	75	3	12400	BMS1,DCLRE1A,RRP12
GO:CC	plasma membrane region	GO:0098590	0.934193	0.0295634	493	75	3	12400	LOC100230461,OPN4,SHISA9
GO:CC	secretory vesicle	GO:0099503	0.934193	0.0295634	144	75	1	12400	ANXA7
GO:CC	ubiquitin ligase complex	GO:0000151	0.934193	0.0295634	143	75	1	12400	UBE2D1
GO:BP	regulation of lymphocyte activation	GO:0051249	0.934463	0.0294378	177	75	1	12400	SHLD2
GO:BP	regulation of trans-synaptic signaling	GO:0099177	0.934463	0.0294378	177	75	1	12400	SHISA9
GO:BP	regulation of epithelial cell proliferation	GO:0050678	0.934463	0.0294378	177	75	1	12400	GDF2
GO:BP	kidney development	GO:0001822	0.934463	0.0294378	176	75	1	12400	FGF8
GO:BP	canonical Wnt signaling pathway	GO:0060070	0.934463	0.0294378	175	75	1	12400	SFRP5
GO:BP	embryonic organ morphogenesis	GO:0048562	0.934463	0.0294378	177	75	1	12400	FGF8
GO:BP	positive regulation of GTPase activity	GO:0043547	0.934463	0.0294378	177	75	1	12400	RAB11FIP2
GO:BP	modulation of chemical synaptic transmission	GO:0050804	0.934463	0.0294378	176	75	1	12400	SHISA9
GO:BP	positive regulation of immune response	GO:0050778	0.934463	0.0294378	175	75	1	12400	SHLD2
GO:BP	reproductive process	GO:0022414	0.936038	0.0287067	567	75	3	12400	CFAP43,FGF8,LOC100218933
GO:BP	reproduction	GO:0000003	0.936038	0.0287067	568	75	3	12400	CFAP43,FGF8,LOC100218933
GO:BP	epithelial cell migration	GO:0010631	0.936038	0.0287067	182	75	1	12400	GDF2
GO:BP	regulation of response to external stimulus	GO:0032101	0.936038	0.0287067	381	75	2	12400	ALOX5,PIK3AP1
GO:BP	regulation of apoptotic signaling pathway	GO:2001233	0.936038	0.0287067	180	75	1	12400	PPIF
GO:BP	regulation of transport	GO:0051049	0.936038	0.0287067	756	75	4	12400	LOC100228612,METTL21C,PPIF,SHISA9
GO:BP	cilium organization	GO:0044782	0.936038	0.0287067	187	75	1	12400	CFAP43
GO:BP	peptidyl-tyrosine phosphorylation	GO:0018108	0.936038	0.0287067	187	75	1	12400	FGF8
GO:BP	positive regulation of cytokine production	GO:0001819	0.936038	0.0287067	183	75	1	12400	GDF2
GO:BP	protein dephosphorylation	GO:0006470	0.936038	0.0287067	186	75	1	12400	LOC105759360
GO:BP	response to inorganic substance	GO:0010035	0.936038	0.0287067	178	75	1	12400	PPIF
GO:BP	regulation of protein phosphorylation	GO:0001932	0.936038	0.0287067	565	75	3	12400	AVPI1,FGF8,GDF2
GO:BP	response to cytokine	GO:0034097	0.936038	0.0287067	375	75	2	12400	INA,TNFRSF17
GO:BP	ncRNA processing	GO:0034470	0.936038	0.0287067	181	75	1	12400	EXOSC3
GO:BP	blood vessel development	GO:0001568	0.936038	0.0287067	381	75	2	12400	FGF8,GDF2
GO:BP	regulation of cell population proliferation	GO:0042127	0.936038	0.0287067	756	75	4	12400	FGF8,GDF2,HPSE2,SFRP5
GO:BP	negative regulation of organelle organization	GO:0010639	0.936038	0.0287067	183	75	1	12400	PPIF
GO:BP	renal system development	GO:0072001	0.936038	0.0287067	185	75	1	12400	FGF8
GO:BP	head development	GO:0060322	0.936038	0.0287067	374	75	2	12400	CFAP43,FGF8
GO:BP	regulation of membrane potential	GO:0042391	0.936038	0.0287067	180	75	1	12400	GNA11
GO:BP	positive regulation of response to stimulus	GO:0048584	0.936038	0.0287067	939	75	5	12400	AVPI1,FGF8,GDF2,PIK3AP1,SHLD2
GO:BP	regulation of response to stress	GO:0080134	0.936038	0.0287067	570	75	3	12400	ALOX5,PIK3AP1,SHLD2
GO:BP	spermatogenesis	GO:0007283	0.936038	0.0287067	179	75	1	12400	CFAP43
GO:BP	regulation of Wnt signaling pathway	GO:0030111	0.936038	0.0287067	182	75	1	12400	SFRP5
GO:BP	response to oxidative stress	GO:0006979	0.936038	0.0287067	181	75	1	12400	PPIF
GO:BP	circulatory system development	GO:0072359	0.93668	0.0284086	575	75	3	12400	FGF8,GDF2,GNA11
GO:CC	cytoplasmic vesicle membrane	GO:0030659	0.939241	0.0272231	149	75	1	12400	ANXA7
GO:BP	cellular response to stress	GO:0033554	0.939836	0.0269477	945	75	5	12400	DCLRE1A,POLL,PPIF,SFR1,SHLD2
GO:BP	regulation of translation	GO:0006417	0.939836	0.0269477	190	75	1	12400	PTCD3
GO:BP	peptidyl-tyrosine modification	GO:0018212	0.939836	0.0269477	190	75	1	12400	FGF8
GO:BP	male gamete generation	GO:0048232	0.941413	0.0262196	191	75	1	12400	CFAP43
GO:BP	tube development	GO:0035295	0.945439	0.0243667	584	75	3	12400	FGF8,GDF2,SFRP5
GO:CC	organelle lumen	GO:0043233	0.947442	0.0234475	2448	75	14	12400	ADD3,ALOX5,BMS1,CHAF1B,DCLRE1A,LOC100228612,OGDHL,POLL,PTCD3,PYROXD2,RAB11FIP2,RRP12,SFR1,TWNK
GO:CC	intracellular non-membrane-bounded organelle	GO:0043232	0.947442	0.0234475	2256	75	13	12400	ADD3,BMS1,CFAP43,CHAF1B,DCLRE1A,INA,KIF11,LDB3,PTCD3,RRP12,SFR1,SHLD2,TWNK
GO:CC	membrane-enclosed lumen	GO:0031974	0.947442	0.0234475	2448	75	14	12400	ADD3,ALOX5,BMS1,CHAF1B,DCLRE1A,LOC100228612,OGDHL,POLL,PTCD3,PYROXD2,RAB11FIP2,RRP12,SFR1,TWNK
GO:CC	supramolecular complex	GO:0099080	0.947442	0.0234475	528	75	3	12400	INA,KIF11,LDB3
GO:CC	intracellular organelle lumen	GO:0070013	0.947442	0.0234475	2448	75	14	12400	ADD3,ALOX5,BMS1,CHAF1B,DCLRE1A,LOC100228612,OGDHL,POLL,PTCD3,PYROXD2,RAB11FIP2,RRP12,SFR1,TWNK
GO:CC	cell body	GO:0044297	0.947442	0.0234475	158	75	1	12400	LOC100218933
GO:CC	non-membrane-bounded organelle	GO:0043228	0.947442	0.0234475	2258	75	13	12400	ADD3,BMS1,CFAP43,CHAF1B,DCLRE1A,INA,KIF11,LDB3,PTCD3,RRP12,SFR1,SHLD2,TWNK
GO:BP	regionalization	GO:0003002	0.949641	0.0224403	195	75	1	12400	FGF8
GO:CC	dendritic tree	GO:0097447	0.951563	0.0215624	180	75	1	12400	SHISA9
GO:CC	receptor complex	GO:0043235	0.951563	0.0215624	177	75	1	12400	SHISA9
GO:CC	microtubule	GO:0005874	0.951563	0.0215624	177	75	1	12400	KIF11
GO:CC	glutamatergic synapse	GO:0098978	0.951563	0.0215624	179	75	1	12400	SHISA9
GO:CC	dendrite	GO:0030425	0.951563	0.0215624	179	75	1	12400	SHISA9
GO:BP	protein ubiquitination	GO:0016567	0.952005	0.0213609	398	75	2	12400	MARCHF8,UBE2D1
GO:BP	vasculature development	GO:0001944	0.952749	0.0210213	399	75	2	12400	FGF8,GDF2
GO:BP	regulation of cellular localization	GO:0060341	0.955995	0.0195443	402	75	2	12400	LOC100228612,METTL21C
GO:BP	regulation of DNA-binding transcription factor activity	GO:0051090	0.955995	0.0195443	199	75	1	12400	SFRP5
GO:BP	localization of cell	GO:0051674	0.956852	0.0191554	784	75	4	12400	ALOX5,CFAP43,FGF8,GDF2
GO:BP	cell motility	GO:0048870	0.956852	0.0191554	784	75	4	12400	ALOX5,CFAP43,FGF8,GDF2
GO:MF	binding	GO:0005488	0.958084	0.0185963	7674	75	44	12400	ADGRA1,ALOX5,ANKRD2,ANKRD22,ANXA7,BMS1,CFAP43,CHAF1B,DCLRE1A,EXOSC3,FGF8,GDF2,GNA11,GOLGA7B,HPS6,HPSE2,KAZALD1,KERA,KIF11,LDB3,LOC100218590,LOC100218933,LOC100219821,LOC100228612,LRMDA,MARCHF8,METTL21C,OGDHL,OPN4,PIK3AP1,POLL,PPIF,PPP1R3C,PTCD3,RAB11FIP2,SAMD8,SFRP5,SHISA9,SORCS1,TRUB1,TWNK,UBE2D1,ZCCHC24,ZNF488
GO:MF	binding	GO:0005488	0.958084	0.0185963	7674	75	44	12400	ADGRA1,ALOX5,ANKRD2,ANKRD22,ANXA7,BMS1,CFAP43,CHAF1B,DCLRE1A,EXOSC3,FGF8,GDF2,GNA11,GOLGA7B,HPS6,HPSE2,KAZALD1,KERA,KIF11,LDB3,LOC100218590,LOC100218933,LOC100219821,LOC100228612,LRMDA,MARCHF8,METTL21C,OGDHL,OPN4,PIK3AP1,POLL,PPIF,PPP1R3C,PTCD3,RAB11FIP2,SAMD8,SFRP5,SHISA9,SORCS1,TRUB1,TWNK,UBE2D1,ZCCHC24,ZNF488
GO:BP	positive regulation of cell communication	GO:0010647	0.958619	0.0183542	787	75	4	12400	AVPI1,FGF8,GDF2,PIK3AP1
GO:BP	immune effector process	GO:0002252	0.958619	0.0183542	202	75	1	12400	SHLD2
GO:BP	system process	GO:0003008	0.958847	0.0182507	788	75	4	12400	CFAP43,OPN4,RGR,SHISA9
GO:MF	transcription coregulator activity	GO:0003712	0.960814	0.0173609	236	75	1	12400	SFR1
GO:MF	transcription coregulator activity	GO:0003712	0.960814	0.0173609	236	75	1	12400	SFR1
GO:BP	epithelium development	GO:0060429	0.961523	0.0170403	604	75	3	12400	ANXA7,FGF8,GDF2
GO:BP	positive regulation of signaling	GO:0023056	0.961523	0.0170403	792	75	4	12400	AVPI1,FGF8,GDF2,PIK3AP1
GO:BP	urogenital system development	GO:0001655	0.961523	0.0170403	205	75	1	12400	FGF8
GO:BP	ossification	GO:0001503	0.962342	0.0166706	207	75	1	12400	GDF2
GO:BP	peptidyl-lysine modification	GO:0018205	0.962342	0.0166706	207	75	1	12400	METTL21C
GO:BP	cellular response to lipid	GO:0071396	0.962342	0.0166706	207	75	1	12400	METTL21C
GO:BP	negative regulation of apoptotic process	GO:0043066	0.962342	0.0166706	413	75	2	12400	FGF8,PPIF
GO:MF	phospholipid binding	GO:0005543	0.964446	0.0157222	241	75	1	12400	ANXA7
GO:MF	phospholipid binding	GO:0005543	0.964446	0.0157222	241	75	1	12400	ANXA7
GO:BP	signal release	GO:0023061	0.964696	0.0156096	210	75	1	12400	RAB11FIP2
GO:BP	forebrain development	GO:0030900	0.964696	0.0156096	209	75	1	12400	FGF8
GO:BP	response to wounding	GO:0009611	0.964696	0.0156096	210	75	1	12400	HPS6
GO:BP	regulation of leukocyte activation	GO:0002694	0.964696	0.0156096	210	75	1	12400	SHLD2
GO:BP	negative regulation of response to stimulus	GO:0048585	0.965005	0.0154706	803	75	4	12400	ALOX5,PPIF,SFRP5,SHLD2
GO:CC	cell leading edge	GO:0031252	0.967662	0.0142765	191	75	1	12400	SHISA9
GO:CC	spindle	GO:0005819	0.967662	0.0142765	191	75	1	12400	KIF11
GO:MF	zinc ion binding	GO:0008270	0.968132	0.0140656	466	75	2	12400	MARCHF8,ZCCHC24
GO:MF	zinc ion binding	GO:0008270	0.968132	0.0140656	466	75	2	12400	MARCHF8,ZCCHC24
GO:BP	mitotic cell cycle	GO:0000278	0.968792	0.0137694	428	75	2	12400	FGF8,KIF11
GO:BP	regulation of phosphorylation	GO:0042325	0.968792	0.0137694	625	75	3	12400	AVPI1,FGF8,GDF2
GO:BP	regulation of mitotic cell cycle	GO:0007346	0.968792	0.0137694	218	75	1	12400	FGF8
GO:BP	negative regulation of programmed cell death	GO:0043069	0.968792	0.0137694	426	75	2	12400	FGF8,PPIF
GO:BP	movement of cell or subcellular component	GO:0006928	0.968792	0.0137694	997	75	5	12400	ALOX5,CFAP43,FGF8,GDF2,KIF11
GO:BP	apoptotic process	GO:0006915	0.968792	0.0137694	811	75	4	12400	CALHM2,FGF8,METTL21C,PPIF
GO:BP	autophagy	GO:0006914	0.968792	0.0137694	219	75	1	12400	ANXA7
GO:BP	gland development	GO:0048732	0.968792	0.0137694	215	75	1	12400	FGF8
GO:BP	regulation of cellular amide metabolic process	GO:0034248	0.968792	0.0137694	216	75	1	12400	PTCD3
GO:BP	regulation of protein modification process	GO:0031399	0.968792	0.0137694	811	75	4	12400	AVPI1,FGF8,GDF2,UBE2D1
GO:BP	epithelial cell proliferation	GO:0050673	0.968792	0.0137694	219	75	1	12400	GDF2
GO:BP	carboxylic acid metabolic process	GO:0019752	0.968792	0.0137694	427	75	2	12400	ALOX5,LOC100228612
GO:BP	process utilizing autophagic mechanism	GO:0061919	0.968792	0.0137694	219	75	1	12400	ANXA7
GO:BP	organelle assembly	GO:0070925	0.968792	0.0137694	424	75	2	12400	CFAP43,KIF11
GO:BP	oxoacid metabolic process	GO:0043436	0.968874	0.0137328	430	75	2	12400	ALOX5,LOC100228612
GO:BP	regulation of anatomical structure morphogenesis	GO:0022603	0.969379	0.0135063	431	75	2	12400	FGF8,GDF2
GO:BP	protein modification by small protein conjugation	GO:0032446	0.97093	0.0128119	433	75	2	12400	MARCHF8,UBE2D1
GO:BP	regulation of system process	GO:0044057	0.97093	0.0128119	222	75	1	12400	SHISA9
GO:BP	regulation of GTPase activity	GO:0043087	0.971959	0.0123519	223	75	1	12400	RAB11FIP2
GO:BP	response to stress	GO:0006950	0.972633	0.012051	1565	75	8	12400	ALOX5,DCLRE1A,HPS6,PIK3AP1,POLL,PPIF,SFR1,SHLD2
GO:BP	positive regulation of apoptotic process	GO:0043065	0.973922	0.0114757	226	75	1	12400	CALHM2
GO:BP	positive regulation of protein kinase activity	GO:0045860	0.973922	0.0114757	226	75	1	12400	AVPI1
GO:BP	regulation of cell activation	GO:0050865	0.973922	0.0114757	226	75	1	12400	SHLD2
GO:MF	GTP binding	GO:0005525	0.976696	0.0102407	257	75	1	12400	BMS1
GO:MF	phosphoric ester hydrolase activity	GO:0042578	0.976696	0.0102407	258	75	1	12400	LOC105759360
GO:MF	GTP binding	GO:0005525	0.976696	0.0102407	257	75	1	12400	BMS1
GO:MF	phosphoric ester hydrolase activity	GO:0042578	0.976696	0.0102407	258	75	1	12400	LOC105759360
GO:BP	positive regulation of programmed cell death	GO:0043068	0.977472	0.00989562	232	75	1	12400	CALHM2
GO:BP	reproductive system development	GO:0061458	0.977472	0.00989562	232	75	1	12400	FGF8
GO:BP	anion transport	GO:0006820	0.977472	0.00989562	231	75	1	12400	LOC100230461
GO:BP	organic acid metabolic process	GO:0006082	0.977472	0.00989562	446	75	2	12400	ALOX5,LOC100228612
GO:BP	peptidyl-amino acid modification	GO:0018193	0.977472	0.00989562	647	75	3	12400	FGF8,METTL21C,PPIF
GO:BP	reproductive structure development	GO:0048608	0.977472	0.00989562	230	75	1	12400	FGF8
GO:BP	positive regulation of developmental process	GO:0051094	0.977472	0.00989562	645	75	3	12400	FGF8,GDF2,SHLD2
GO:BP	programmed cell death	GO:0012501	0.977472	0.00989562	839	75	4	12400	CALHM2,FGF8,METTL21C,PPIF
GO:BP	regulation of apoptotic process	GO:0042981	0.977785	0.00975652	655	75	3	12400	CALHM2,FGF8,PPIF
GO:BP	microtubule-based process	GO:0007017	0.977785	0.00975652	448	75	2	12400	CFAP43,KIF11
GO:BP	lipid metabolic process	GO:0006629	0.977785	0.00975652	653	75	3	12400	ALOX5,LOC100218590,LOC100218933
GO:BP	regulation of protein serine/threonine kinase activity	GO:0071900	0.977785	0.00975652	235	75	1	12400	AVPI1
GO:BP	regulation of molecular function	GO:0065009	0.977785	0.00975652	1410	75	7	12400	AVPI1,KNDC1,LOC100228612,PPIF,RAB11FIP2,SFRP5,SHISA9
GO:BP	RNA processing	GO:0006396	0.977785	0.00975652	453	75	2	12400	EXOSC3,TRUB1
GO:BP	peptide metabolic process	GO:0006518	0.977785	0.00975652	449	75	2	12400	LOC100228612,PTCD3
GO:BP	negative regulation of developmental process	GO:0051093	0.977785	0.00975652	452	75	2	12400	FGF8,SFRP5
GO:CC	membrane protein complex	GO:0098796	0.978237	0.00955611	602	75	3	12400	LOC100230461,PPIF,SHISA9
GO:CC	axon	GO:0030424	0.978237	0.00955611	201	75	1	12400	LOC100218933
GO:CC	endosome	GO:0005768	0.978237	0.00955611	407	75	2	12400	MARCHF8,RAB11FIP2
GO:BP	organelle localization	GO:0051640	0.979308	0.0090809	239	75	1	12400	HPS6
GO:BP	pattern specification process	GO:0007389	0.979308	0.0090809	239	75	1	12400	FGF8
GO:BP	Wnt signaling pathway	GO:0016055	0.979308	0.0090809	239	75	1	12400	SFRP5
GO:MF	ion transmembrane transporter activity	GO:0015075	0.979543	0.0089764	505	75	2	12400	LOC100230461,SFXN2
GO:MF	GTPase activator activity	GO:0005096	0.979543	0.0089764	271	75	1	12400	KNDC1
GO:MF	GTPase regulator activity	GO:0030695	0.979543	0.0089764	282	75	1	12400	KNDC1
GO:MF	transferase activity	GO:0016740	0.979543	0.0089764	1491	75	7	12400	COMTD1,LOC100228612,MARCHF8,METTL21C,POLL,UBE2D1,ZNF488
GO:MF	ion channel activity	GO:0005216	0.979543	0.0089764	279	75	1	12400	LOC100230461
GO:MF	guanyl ribonucleotide binding	GO:0032561	0.979543	0.0089764	269	75	1	12400	BMS1
GO:MF	ion transmembrane transporter activity	GO:0015075	0.979543	0.0089764	505	75	2	12400	LOC100230461,SFXN2
GO:MF	GTPase activator activity	GO:0005096	0.979543	0.0089764	271	75	1	12400	KNDC1
GO:MF	GTPase regulator activity	GO:0030695	0.979543	0.0089764	282	75	1	12400	KNDC1
GO:MF	transferase activity	GO:0016740	0.979543	0.0089764	1491	75	7	12400	COMTD1,LOC100228612,MARCHF8,METTL21C,POLL,UBE2D1,ZNF488
GO:MF	ion channel activity	GO:0005216	0.979543	0.0089764	279	75	1	12400	LOC100230461
GO:MF	guanyl ribonucleotide binding	GO:0032561	0.979543	0.0089764	269	75	1	12400	BMS1
GO:BP	small GTPase mediated signal transduction	GO:0007264	0.980104	0.00872793	240	75	1	12400	KNDC1
GO:BP	endocytosis	GO:0006897	0.980887	0.00838087	241	75	1	12400	LOC100229828
GO:BP	positive regulation of multicellular organismal process	GO:0051240	0.981573	0.00807731	664	75	3	12400	FGF8,GDF2,SHLD2
GO:BP	negative regulation of multicellular organismal process	GO:0051241	0.981573	0.00807731	462	75	2	12400	FGF8,GDF2
GO:BP	negative regulation of cell death	GO:0060548	0.981573	0.00807731	465	75	2	12400	FGF8,PPIF
GO:BP	ncRNA metabolic process	GO:0034660	0.981573	0.00807731	245	75	1	12400	EXOSC3
GO:BP	positive regulation of kinase activity	GO:0033674	0.981573	0.00807731	246	75	1	12400	AVPI1
GO:BP	central nervous system development	GO:0007417	0.981573	0.00807731	463	75	2	12400	CFAP43,FGF8
GO:BP	cell-cell signaling by wnt	GO:0198738	0.981573	0.00807731	243	75	1	12400	SFRP5
GO:BP	regulation of signal transduction	GO:0009966	0.981573	0.00807731	1432	75	7	12400	AVPI1,FGF8,GDF2,PIK3AP1,PPIF,SFRP5,SHISA9
GO:BP	homeostatic process	GO:0042592	0.981748	0.00799981	868	75	4	12400	LOC100228612,METTL21C,RAB11FIP2,TNFRSF17
GO:CC	nuclear envelope	GO:0005635	0.982067	0.00785871	209	75	1	12400	ALOX5
GO:CC	neuron projection	GO:0043005	0.982067	0.00785871	419	75	2	12400	LOC100218933,SHISA9
GO:MF	molecular function regulator	GO:0098772	0.983513	0.00721979	516	75	1	12400	KNDC1
GO:MF	heterocyclic compound binding	GO:1901363	0.983513	0.00721979	3098	75	13	12400	BMS1,DCLRE1A,EXOSC3,GNA11,KIF11,LOC100218933,OGDHL,POLL,PTCD3,TRUB1,TWNK,UBE2D1,ZCCHC24
GO:MF	ATP binding	GO:0005524	0.983513	0.00721979	1004	75	3	12400	KIF11,TWNK,UBE2D1
GO:MF	DNA binding	GO:0003677	0.983513	0.00721979	1062	75	3	12400	DCLRE1A,POLL,TWNK
GO:MF	cytoskeletal protein binding	GO:0008092	0.983513	0.00721979	526	75	1	12400	KIF11
GO:MF	carbohydrate derivative binding	GO:0097367	0.983513	0.00721979	1421	75	6	12400	BMS1,HPSE2,KIF11,LOC100219821,TWNK,UBE2D1
GO:MF	enzyme activator activity	GO:0008047	0.983513	0.00721979	374	75	1	12400	KNDC1
GO:MF	organic cyclic compound binding	GO:0097159	0.983513	0.00721979	3137	75	13	12400	BMS1,DCLRE1A,EXOSC3,GNA11,KIF11,LOC100218933,OGDHL,POLL,PTCD3,TRUB1,TWNK,UBE2D1,ZCCHC24
GO:MF	nucleoside phosphate binding	GO:1901265	0.983513	0.00721979	1445	75	5	12400	BMS1,GNA11,KIF11,TWNK,UBE2D1
GO:MF	passive transmembrane transporter activity	GO:0022803	0.983513	0.00721979	301	75	1	12400	LOC100230461
GO:MF	metal ion binding	GO:0046872	0.983513	0.00721979	1778	75	7	12400	ALOX5,ANXA7,DCLRE1A,LOC100218933,MARCHF8,POLL,ZCCHC24
GO:MF	nucleoside-triphosphatase regulator activity	GO:0060589	0.983513	0.00721979	306	75	1	12400	KNDC1
GO:MF	protein domain specific binding	GO:0019904	0.983513	0.00721979	313	75	1	12400	SHISA9
GO:MF	transporter activity	GO:0005215	0.983513	0.00721979	730	75	2	12400	LOC100230461,SFXN2
GO:MF	transmembrane transporter activity	GO:0022857	0.983513	0.00721979	675	75	2	12400	LOC100230461,SFXN2
GO:MF	enzyme regulator activity	GO:0030234	0.983513	0.00721979	454	75	1	12400	KNDC1
GO:MF	adenyl nucleotide binding	GO:0030554	0.983513	0.00721979	1039	75	3	12400	KIF11,TWNK,UBE2D1
GO:MF	ribonucleotide binding	GO:0032553	0.983513	0.00721979	1294	75	4	12400	BMS1,KIF11,TWNK,UBE2D1
GO:MF	purine ribonucleotide binding	GO:0032555	0.983513	0.00721979	1283	75	4	12400	BMS1,KIF11,TWNK,UBE2D1
GO:MF	adenyl ribonucleotide binding	GO:0032559	0.983513	0.00721979	1034	75	3	12400	KIF11,TWNK,UBE2D1
GO:MF	purine ribonucleoside triphosphate binding	GO:0035639	0.983513	0.00721979	1248	75	4	12400	BMS1,KIF11,TWNK,UBE2D1
GO:MF	purine nucleotide binding	GO:0017076	0.983513	0.00721979	1293	75	5	12400	BMS1,GNA11,KIF11,TWNK,UBE2D1
GO:MF	small molecule binding	GO:0036094	0.983513	0.00721979	1609	75	7	12400	BMS1,GNA11,KIF11,OGDHL,OPN4,TWNK,UBE2D1
GO:MF	identical protein binding	GO:0042802	0.983513	0.00721979	1021	75	3	12400	PIK3AP1,RAB11FIP2,TWNK
GO:MF	protein homodimerization activity	GO:0042803	0.983513	0.00721979	387	75	1	12400	RAB11FIP2
GO:MF	anion binding	GO:0043168	0.983513	0.00721979	1551	75	5	12400	BMS1,KIF11,OGDHL,TWNK,UBE2D1
GO:MF	calcium ion binding	GO:0005509	0.983513	0.00721979	377	75	1	12400	ANXA7
GO:MF	cation binding	GO:0043169	0.983513	0.00721979	1832	75	8	12400	ALOX5,ANXA7,DCLRE1A,LOC100218933,MARCHF8,OGDHL,POLL,ZCCHC24
GO:MF	inorganic molecular entity transmembrane transporter activity	GO:0015318	0.983513	0.00721979	446	75	1	12400	LOC100230461
GO:MF	channel activity	GO:0015267	0.983513	0.00721979	301	75	1	12400	LOC100230461
GO:MF	nucleic acid binding	GO:0003676	0.983513	0.00721979	1748	75	7	12400	DCLRE1A,EXOSC3,POLL,PTCD3,TRUB1,TWNK,ZCCHC24
GO:MF	nucleotide binding	GO:0000166	0.983513	0.00721979	1445	75	5	12400	BMS1,GNA11,KIF11,TWNK,UBE2D1
GO:MF	molecular function regulator	GO:0098772	0.983513	0.00721979	516	75	1	12400	KNDC1
GO:MF	heterocyclic compound binding	GO:1901363	0.983513	0.00721979	3098	75	13	12400	BMS1,DCLRE1A,EXOSC3,GNA11,KIF11,LOC100218933,OGDHL,POLL,PTCD3,TRUB1,TWNK,UBE2D1,ZCCHC24
GO:MF	ATP binding	GO:0005524	0.983513	0.00721979	1004	75	3	12400	KIF11,TWNK,UBE2D1
GO:MF	DNA binding	GO:0003677	0.983513	0.00721979	1062	75	3	12400	DCLRE1A,POLL,TWNK
GO:MF	cytoskeletal protein binding	GO:0008092	0.983513	0.00721979	526	75	1	12400	KIF11
GO:MF	carbohydrate derivative binding	GO:0097367	0.983513	0.00721979	1421	75	6	12400	BMS1,HPSE2,KIF11,LOC100219821,TWNK,UBE2D1
GO:MF	enzyme activator activity	GO:0008047	0.983513	0.00721979	374	75	1	12400	KNDC1
GO:MF	organic cyclic compound binding	GO:0097159	0.983513	0.00721979	3137	75	13	12400	BMS1,DCLRE1A,EXOSC3,GNA11,KIF11,LOC100218933,OGDHL,POLL,PTCD3,TRUB1,TWNK,UBE2D1,ZCCHC24
GO:MF	nucleoside phosphate binding	GO:1901265	0.983513	0.00721979	1445	75	5	12400	BMS1,GNA11,KIF11,TWNK,UBE2D1
GO:MF	passive transmembrane transporter activity	GO:0022803	0.983513	0.00721979	301	75	1	12400	LOC100230461
GO:MF	metal ion binding	GO:0046872	0.983513	0.00721979	1778	75	7	12400	ALOX5,ANXA7,DCLRE1A,LOC100218933,MARCHF8,POLL,ZCCHC24
GO:MF	nucleoside-triphosphatase regulator activity	GO:0060589	0.983513	0.00721979	306	75	1	12400	KNDC1
GO:MF	protein domain specific binding	GO:0019904	0.983513	0.00721979	313	75	1	12400	SHISA9
GO:MF	transporter activity	GO:0005215	0.983513	0.00721979	730	75	2	12400	LOC100230461,SFXN2
GO:MF	transmembrane transporter activity	GO:0022857	0.983513	0.00721979	675	75	2	12400	LOC100230461,SFXN2
GO:MF	enzyme regulator activity	GO:0030234	0.983513	0.00721979	454	75	1	12400	KNDC1
GO:MF	adenyl nucleotide binding	GO:0030554	0.983513	0.00721979	1039	75	3	12400	KIF11,TWNK,UBE2D1
GO:MF	ribonucleotide binding	GO:0032553	0.983513	0.00721979	1294	75	4	12400	BMS1,KIF11,TWNK,UBE2D1
GO:MF	purine ribonucleotide binding	GO:0032555	0.983513	0.00721979	1283	75	4	12400	BMS1,KIF11,TWNK,UBE2D1
GO:MF	adenyl ribonucleotide binding	GO:0032559	0.983513	0.00721979	1034	75	3	12400	KIF11,TWNK,UBE2D1
GO:MF	purine ribonucleoside triphosphate binding	GO:0035639	0.983513	0.00721979	1248	75	4	12400	BMS1,KIF11,TWNK,UBE2D1
GO:MF	purine nucleotide binding	GO:0017076	0.983513	0.00721979	1293	75	5	12400	BMS1,GNA11,KIF11,TWNK,UBE2D1
GO:MF	small molecule binding	GO:0036094	0.983513	0.00721979	1609	75	7	12400	BMS1,GNA11,KIF11,OGDHL,OPN4,TWNK,UBE2D1
GO:MF	identical protein binding	GO:0042802	0.983513	0.00721979	1021	75	3	12400	PIK3AP1,RAB11FIP2,TWNK
GO:MF	protein homodimerization activity	GO:0042803	0.983513	0.00721979	387	75	1	12400	RAB11FIP2
GO:MF	anion binding	GO:0043168	0.983513	0.00721979	1551	75	5	12400	BMS1,KIF11,OGDHL,TWNK,UBE2D1
GO:MF	calcium ion binding	GO:0005509	0.983513	0.00721979	377	75	1	12400	ANXA7
GO:MF	cation binding	GO:0043169	0.983513	0.00721979	1832	75	8	12400	ALOX5,ANXA7,DCLRE1A,LOC100218933,MARCHF8,OGDHL,POLL,ZCCHC24
GO:MF	inorganic molecular entity transmembrane transporter activity	GO:0015318	0.983513	0.00721979	446	75	1	12400	LOC100230461
GO:MF	channel activity	GO:0015267	0.983513	0.00721979	301	75	1	12400	LOC100230461
GO:MF	nucleic acid binding	GO:0003676	0.983513	0.00721979	1748	75	7	12400	DCLRE1A,EXOSC3,POLL,PTCD3,TRUB1,TWNK,ZCCHC24
GO:MF	nucleotide binding	GO:0000166	0.983513	0.00721979	1445	75	5	12400	BMS1,GNA11,KIF11,TWNK,UBE2D1
GO:BP	regulation of programmed cell death	GO:0043067	0.983834	0.00707822	674	75	3	12400	CALHM2,FGF8,PPIF
GO:BP	signaling	GO:0023052	0.984805	0.00664991	3050	75	16	12400	ADGRA1,ARHGAP19,AVPI1,FGF8,GDF2,GNA11,KNDC1,METTL21C,OPN4,PIK3AP1,PPIF,RAB11FIP2,RGR,SFRP5,SHISA9,TNFRSF17
GO:MF	ion binding	GO:0043167	0.984943	0.0065888	3058	75	12	12400	ALOX5,ANXA7,BMS1,DCLRE1A,KIF11,LOC100218933,MARCHF8,OGDHL,POLL,TWNK,UBE2D1,ZCCHC24
GO:MF	protein dimerization activity	GO:0046983	0.984943	0.0065888	601	75	1	12400	RAB11FIP2
GO:MF	ion binding	GO:0043167	0.984943	0.0065888	3058	75	12	12400	ALOX5,ANXA7,BMS1,DCLRE1A,KIF11,LOC100218933,MARCHF8,OGDHL,POLL,TWNK,UBE2D1,ZCCHC24
GO:MF	protein dimerization activity	GO:0046983	0.984943	0.0065888	601	75	1	12400	RAB11FIP2
GO:BP	proteolysis	GO:0006508	0.985264	0.00644731	879	75	4	12400	LOC100229828,PLAU,RBP3,UBE2D1
GO:BP	positive regulation of cell death	GO:0010942	0.985264	0.00644731	251	75	1	12400	CALHM2
GO:BP	regulation of response to stimulus	GO:0048583	0.985264	0.00644731	1812	75	9	12400	ALOX5,AVPI1,FGF8,GDF2,PIK3AP1,PPIF,SFRP5,SHISA9,SHLD2
GO:BP	embryonic organ development	GO:0048568	0.985264	0.00644731	252	75	1	12400	FGF8
GO:BP	regulation of cell cycle	GO:0051726	0.985264	0.00644731	475	75	2	12400	FGF8,KIF11
GO:BP	primary metabolic process	GO:0044238	0.988272	0.00512371	5475	75	30	12400	ALOX5,AVPI1,DCLRE1A,EXOSC3,FGF8,GDF2,LOC100218590,LOC100218933,LOC100219821,LOC100228612,LOC100229828,LOC105759360,MARCHF8,METTL21C,OGDHL,OPN4,PLAU,POLL,POLR3GL,PPIF,PPP1R3C,PTCD3,RBP3,RGR,SFR1,SFRP5,SHLD2,TRUB1,TWNK,UBE2D1
GO:BP	defense response	GO:0006952	0.988272	0.00512371	483	75	2	12400	ALOX5,PIK3AP1
GO:BP	cellular response to organonitrogen compound	GO:0071417	0.988272	0.00512371	258	75	1	12400	GNA11
GO:BP	cytoskeleton organization	GO:0007010	0.988272	0.00512371	693	75	3	12400	CFAP43,INA,KIF11
GO:BP	cell communication	GO:0007154	0.988272	0.00512371	3086	75	16	12400	ADGRA1,ARHGAP19,AVPI1,FGF8,GDF2,GNA11,KNDC1,METTL21C,OPN4,PIK3AP1,PPIF,RAB11FIP2,RGR,SFRP5,SHISA9,TNFRSF17
GO:BP	plasma membrane bounded cell projection assembly	GO:0120031	0.988272	0.00512371	262	75	1	12400	CFAP43
GO:BP	cell-cell signaling	GO:0007267	0.988272	0.00512371	690	75	3	12400	RAB11FIP2,SFRP5,SHISA9
GO:BP	monocarboxylic acid metabolic process	GO:0032787	0.988272	0.00512371	260	75	1	12400	ALOX5
GO:BP	gamete generation	GO:0007276	0.988272	0.00512371	259	75	1	12400	CFAP43
GO:BP	protein localization to membrane	GO:0072657	0.988272	0.00512371	262	75	1	12400	HPS6
GO:BP	regulation of immune response	GO:0050776	0.988272	0.00512371	260	75	1	12400	SHLD2
GO:BP	posttranscriptional regulation of gene expression	GO:0010608	0.988272	0.00512371	261	75	1	12400	PTCD3
GO:MF	transferase activity, transferring phosphorus-containing groups	GO:0016772	0.988373	0.00507892	663	75	1	12400	POLL
GO:MF	transferase activity, transferring phosphorus-containing groups	GO:0016772	0.988373	0.00507892	663	75	1	12400	POLL
GO:BP	chemotaxis	GO:0006935	0.988747	0.0049148	264	75	1	12400	ALOX5
GO:BP	regulation of biological quality	GO:0065008	0.988747	0.0049148	1841	75	9	12400	GNA11,HPS6,LOC100218933,LOC100228612,METTL21C,PPIF,RAB11FIP2,SHISA9,TNFRSF17
GO:BP	cell projection assembly	GO:0030031	0.989126	0.00474836	265	75	1	12400	CFAP43
GO:BP	cell death	GO:0008219	0.991831	0.00356213	904	75	4	12400	CALHM2,FGF8,METTL21C,PPIF
GO:MF	transcription regulator activity	GO:0140110	0.992842	0.00311976	788	75	1	12400	SFR1
GO:MF	transcription regulator activity	GO:0140110	0.992842	0.00311976	788	75	1	12400	SFR1
GO:BP	anterograde trans-synaptic signaling	GO:0098916	0.993527	0.0028202	270	75	1	12400	SHISA9
GO:BP	chemical synaptic transmission	GO:0007268	0.993527	0.0028202	270	75	1	12400	SHISA9
GO:BP	macromolecule modification	GO:0043412	0.995618	0.00190712	2232	75	11	12400	AVPI1,FGF8,GDF2,LOC105759360,MARCHF8,METTL21C,OPN4,PPIF,RGR,TRUB1,UBE2D1
GO:BP	trans-synaptic signaling	GO:0099537	0.995618	0.00190712	275	75	1	12400	SHISA9
GO:BP	cell migration	GO:0016477	0.995618	0.00190712	711	75	3	12400	ALOX5,FGF8,GDF2
GO:BP	regulation of cellular component movement	GO:0051270	0.995618	0.00190712	504	75	2	12400	CFAP43,GDF2
GO:BP	regulation of localization	GO:0032879	0.995618	0.00190712	1303	75	6	12400	CFAP43,GDF2,LOC100228612,METTL21C,PPIF,SHISA9
GO:BP	cell population proliferation	GO:0008283	0.995618	0.00190712	915	75	4	12400	FGF8,GDF2,HPSE2,SFRP5
GO:CC	membrane	GO:0016020	0.996103	0.00169587	4512	75	25	12400	ADD3,ADGRA1,ALOX5,ANKRD22,ANXA7,BORCS7,CALHM2,HPS6,HPSE2,LOC100218933,LOC100229828,LOC100230461,MARCHF8,MFSD13A,OPN4,PIK3AP1,PPIF,PTCD3,RAB11FIP2,RGR,RRP12,SFXN2,SHISA9,SMIM7,SORCS1
GO:CC	cell-cell junction	GO:0005911	0.996103	0.00169587	223	75	1	12400	ADD3
GO:CC	cytoskeleton	GO:0005856	0.997823	0.000946298	1125	75	4	12400	ADD3,CFAP43,INA,KIF11
GO:CC	endoplasmic reticulum	GO:0005783	0.997823	0.000946298	751	75	1	12400	ANXA7
GO:CC	cytoplasm	GO:0005737	0.997823	0.000946298	5329	75	24	12400	ADD3,ALOX5,ANXA7,BORCS7,CFAP43,EXOSC3,GNA11,HPS6,INA,KIF11,LDB3,LOC100228612,MARCHF8,OGDHL,PIK3AP1,PPIF,PTCD3,PYROXD2,RAB11FIP2,RRP12,SFXN2,TRUB1,TWNK,UBE2D1
GO:CC	microtubule cytoskeleton	GO:0015630	0.997823	0.000946298	678	75	1	12400	KIF11
GO:CC	vesicle membrane	GO:0012506	0.997823	0.000946298	311	75	1	12400	ANXA7
GO:CC	endoplasmic reticulum membrane	GO:0005789	0.997823	0.000946298	352	75	1	12400	ANXA7
GO:CC	nucleoplasm	GO:0005654	0.997823	0.000946298	2039	75	8	12400	ALOX5,BMS1,CHAF1B,DCLRE1A,LOC100228612,POLL,PTCD3,RAB11FIP2
GO:CC	integral component of membrane	GO:0016021	0.997823	0.000946298	2774	75	13	12400	ADGRA1,ANKRD22,CALHM2,LOC100230461,MARCHF8,MFSD13A,OPN4,PPIF,RGR,SFXN2,SHISA9,SMIM7,SORCS1
GO:CC	endomembrane system	GO:0012505	0.997823	0.000946298	1874	75	4	12400	ALOX5,ANXA7,MARCHF8,RAB11FIP2
GO:CC	cell projection	GO:0042995	0.997823	0.000946298	881	75	3	12400	CFAP43,LOC100218933,SHISA9
GO:CC	extracellular space	GO:0005615	0.997823	0.000946298	397	75	1	12400	RBP3
GO:CC	cytosol	GO:0005829	0.997823	0.000946298	1795	75	8	12400	ALOX5,HPS6,KIF11,LOC100228612,PIK3AP1,PTCD3,RRP12,TRUB1
GO:CC	cellular_component	GO:0005575	0.997823	0.000946298	9483	75	50	12400	ADD3,ADGRA1,ALOX5,ANKRD2,ANKRD22,ANXA7,BMS1,BORCS7,CALHM2,CFAP43,CHAF1B,DCLRE1A,EXOSC3,FGF8,GDF2,GNA11,HPS6,HPSE2,INA,KAZALD1,KIF11,LDB3,LOC100218933,LOC100219821,LOC100228612,LOC100229828,LOC100230461,MARCHF8,METTL21C,MFSD13A,OGDHL,OPN4,PIK3AP1,POLL,PPIF,PTCD3,PYROXD2,RAB11FIP2,RBP3,RGR,RRP12,SFR1,SFXN2,SHISA9,SHLD2,SMIM7,SORCS1,TRUB1,TWNK,UBE2D1
GO:CC	integral component of plasma membrane	GO:0005887	0.997823	0.000946298	471	75	2	12400	RGR,SHISA9
GO:CC	plasma membrane	GO:0005886	0.997823	0.000946298	2048	75	8	12400	LOC100230461,OPN4,PIK3AP1,PTCD3,RAB11FIP2,RGR,RRP12,SHISA9
GO:CC	intracellular anatomical structure	GO:0005622	0.997823	0.000946298	7164	75	32	12400	ADD3,ALOX5,ANKRD2,ANXA7,BMS1,BORCS7,CFAP43,CHAF1B,DCLRE1A,EXOSC3,GNA11,HPS6,INA,KIF11,LDB3,LOC100228612,MARCHF8,METTL21C,OGDHL,PIK3AP1,POLL,PPIF,PTCD3,PYROXD2,RAB11FIP2,RRP12,SFR1,SFXN2,SHLD2,TRUB1,TWNK,UBE2D1
GO:CC	nucleus	GO:0005634	0.997823	0.000946298	3525	75	15	12400	ADD3,ALOX5,ANXA7,BMS1,CHAF1B,DCLRE1A,LOC100228612,METTL21C,POLL,PTCD3,RAB11FIP2,RRP12,SFR1,SHLD2,TRUB1
GO:CC	nuclear outer membrane-endoplasmic reticulum membrane network	GO:0042175	0.997823	0.000946298	363	75	1	12400	ANXA7
GO:CC	nuclear lumen	GO:0031981	0.997823	0.000946298	2257	75	11	12400	ADD3,ALOX5,BMS1,CHAF1B,DCLRE1A,LOC100228612,POLL,PTCD3,RAB11FIP2,RRP12,SFR1
GO:CC	intrinsic component of plasma membrane	GO:0031226	0.997823	0.000946298	511	75	2	12400	RGR,SHISA9
GO:CC	cytoplasmic vesicle	GO:0031410	0.997823	0.000946298	746	75	3	12400	ANXA7,MARCHF8,RAB11FIP2
GO:CC	mitochondrial membrane	GO:0031966	0.997823	0.000946298	255	75	1	12400	SFXN2
GO:CC	vesicle	GO:0031982	0.997823	0.000946298	821	75	3	12400	ANXA7,MARCHF8,RAB11FIP2
GO:CC	organelle subcompartment	GO:0031984	0.997823	0.000946298	621	75	1	12400	ANXA7
GO:CC	protein-containing complex	GO:0032991	0.997823	0.000946298	2639	75	10	12400	CHAF1B,EXOSC3,HPS6,KIF11,LOC100230461,METTL21C,PPIF,SFR1,SHISA9,UBE2D1
GO:CC	transferase complex	GO:1990234	0.997823	0.000946298	409	75	1	12400	UBE2D1
GO:CC	catalytic complex	GO:1902494	0.997823	0.000946298	717	75	2	12400	EXOSC3,UBE2D1
GO:CC	intracellular protein-containing complex	GO:0140535	0.997823	0.000946298	412	75	1	12400	UBE2D1
GO:CC	nuclear protein-containing complex	GO:0140513	0.997823	0.000946298	644	75	1	12400	SFR1
GO:CC	plasma membrane bounded cell projection	GO:0120025	0.997823	0.000946298	848	75	3	12400	CFAP43,LOC100218933,SHISA9
GO:CC	cellular anatomical entity	GO:0110165	0.997823	0.000946298	9395	75	50	12400	ADD3,ADGRA1,ALOX5,ANKRD2,ANKRD22,ANXA7,BMS1,BORCS7,CALHM2,CFAP43,CHAF1B,DCLRE1A,EXOSC3,FGF8,GDF2,GNA11,HPS6,HPSE2,INA,KAZALD1,KIF11,LDB3,LOC100218933,LOC100219821,LOC100228612,LOC100229828,LOC100230461,MARCHF8,METTL21C,MFSD13A,OGDHL,OPN4,PIK3AP1,POLL,PPIF,PTCD3,PYROXD2,RAB11FIP2,RBP3,RGR,RRP12,SFR1,SFXN2,SHISA9,SHLD2,SMIM7,SORCS1,TRUB1,TWNK,UBE2D1
GO:CC	endoplasmic reticulum subcompartment	GO:0098827	0.997823	0.000946298	359	75	1	12400	ANXA7
GO:CC	plasma membrane protein complex	GO:0098797	0.997823	0.000946298	276	75	1	12400	SHISA9
GO:CC	bounding membrane of organelle	GO:0098588	0.997823	0.000946298	654	75	3	12400	ANXA7,BORCS7,HPS6
GO:CC	intracellular vesicle	GO:0097708	0.997823	0.000946298	751	75	3	12400	ANXA7,MARCHF8,RAB11FIP2
GO:CC	cell periphery	GO:0071944	0.997823	0.000946298	2231	75	11	12400	ADD3,HPSE2,KAZALD1,LOC100230461,OPN4,PIK3AP1,PTCD3,RAB11FIP2,RGR,RRP12,SHISA9
GO:CC	anchoring junction	GO:0070161	0.997823	0.000946298	304	75	1	12400	ADD3
GO:CC	perinuclear region of cytoplasm	GO:0048471	0.997823	0.000946298	296	75	1	12400	ALOX5
GO:CC	intracellular membrane-bounded organelle	GO:0043231	0.997823	0.000946298	5605	75	24	12400	ADD3,ALOX5,ANKRD2,ANXA7,BMS1,BORCS7,CHAF1B,DCLRE1A,HPS6,LOC100228612,MARCHF8,METTL21C,OGDHL,POLL,PPIF,PTCD3,PYROXD2,RAB11FIP2,RRP12,SFR1,SFXN2,SHLD2,TRUB1,TWNK
GO:CC	intracellular organelle	GO:0043229	0.997823	0.000946298	6320	75	28	12400	ADD3,ALOX5,ANKRD2,ANXA7,BMS1,BORCS7,CFAP43,CHAF1B,DCLRE1A,HPS6,INA,KIF11,LDB3,LOC100228612,MARCHF8,METTL21C,OGDHL,POLL,PPIF,PTCD3,PYROXD2,RAB11FIP2,RRP12,SFR1,SFXN2,SHLD2,TRUB1,TWNK
GO:CC	membrane-bounded organelle	GO:0043227	0.997823	0.000946298	5825	75	25	12400	ADD3,ALOX5,ANKRD2,ANXA7,BMS1,BORCS7,CFAP43,CHAF1B,DCLRE1A,HPS6,LOC100228612,MARCHF8,METTL21C,OGDHL,POLL,PPIF,PTCD3,PYROXD2,RAB11FIP2,RRP12,SFR1,SFXN2,SHLD2,TRUB1,TWNK
GO:CC	organelle	GO:0043226	0.997823	0.000946298	6478	75	29	12400	ADD3,ALOX5,ANKRD2,ANXA7,BMS1,BORCS7,CFAP43,CHAF1B,DCLRE1A,HPS6,INA,KIF11,LDB3,LOC100228612,MARCHF8,METTL21C,OGDHL,POLL,PPIF,PTCD3,PYROXD2,RAB11FIP2,RRP12,SFR1,SFXN2,SHISA9,SHLD2,TRUB1,TWNK
GO:CC	intrinsic component of membrane	GO:0031224	0.997823	0.000946298	2819	75	13	12400	ADGRA1,ANKRD22,CALHM2,LOC100230461,MARCHF8,MFSD13A,OPN4,PPIF,RGR,SFXN2,SHISA9,SMIM7,SORCS1
GO:CC	organelle membrane	GO:0031090	0.997823	0.000946298	1254	75	5	12400	ALOX5,ANXA7,BORCS7,HPS6,SFXN2
GO:CC	cilium	GO:0005929	0.997823	0.000946298	314	75	1	12400	CFAP43
GO:CC	cell junction	GO:0030054	0.997823	0.000946298	866	75	4	12400	ADD3,INA,LOC100230461,SHISA9
GO:BP	response to lipid	GO:0033993	0.997863	0.000928994	278	75	1	12400	METTL21C
GO:BP	negative regulation of nucleobase-containing compound metabolic process	GO:0045934	0.998829	0.000508906	709	75	2	12400	GDF2,SHLD2
GO:BP	protein-containing complex subunit organization	GO:0043933	0.998829	0.000508906	786	75	2	12400	CHAF1B,TWNK
GO:BP	animal organ development	GO:0048513	0.998829	0.000508906	1630	75	7	12400	CFAP43,FGF8,GDF2,GNA11,KERA,METTL21C,OPN4
GO:BP	nucleic acid metabolic process	GO:0090304	0.998829	0.000508906	2468	75	10	12400	DCLRE1A,EXOSC3,GDF2,POLL,POLR3GL,SFR1,SFRP5,SHLD2,TRUB1,TWNK
GO:BP	cellular component biogenesis	GO:0044085	0.998829	0.000508906	1453	75	6	12400	BMS1,CFAP43,CHAF1B,EXOSC3,KIF11,TWNK
GO:BP	cell development	GO:0048468	0.998829	0.000508906	996	75	1	12400	CFAP43
GO:BP	positive regulation of molecular function	GO:0044093	0.998829	0.000508906	782	75	3	12400	AVPI1,LOC100228612,RAB11FIP2
GO:BP	regulation of cellular response to stress	GO:0080135	0.998829	0.000508906	320	75	1	12400	SHLD2
GO:BP	regulation of macromolecule metabolic process	GO:0060255	0.998829	0.000508906	2918	75	9	12400	ANXA7,AVPI1,FGF8,GDF2,PTCD3,SFR1,SFRP5,SHLD2,UBE2D1
GO:BP	secretion	GO:0046903	0.998829	0.000508906	412	75	1	12400	RAB11FIP2
GO:BP	lymphocyte activation	GO:0046649	0.998829	0.000508906	288	75	1	12400	SHLD2
GO:BP	positive regulation of hydrolase activity	GO:0051345	0.998829	0.000508906	302	75	1	12400	RAB11FIP2
GO:BP	heterocycle metabolic process	GO:0046483	0.998829	0.000508906	2771	75	11	12400	ALOX5,DCLRE1A,EXOSC3,GDF2,POLL,POLR3GL,SFR1,SFRP5,SHLD2,TRUB1,TWNK
GO:BP	regulation of primary metabolic process	GO:0080090	0.998829	0.000508906	2744	75	8	12400	AVPI1,FGF8,GDF2,PTCD3,SFR1,SFRP5,SHLD2,UBE2D1
GO:BP	positive regulation of transcription by RNA polymerase II	GO:0045944	0.998829	0.000508906	631	75	1	12400	GDF2
GO:BP	anatomical structure development	GO:0048856	0.998829	0.000508906	2728	75	11	12400	ANXA7,CFAP43,FGF8,GDF2,GNA11,INA,KERA,METTL21C,OPN4,SFRP5,SHLD2
GO:BP	cellular developmental process	GO:0048869	0.998829	0.000508906	1898	75	6	12400	ANXA7,CFAP43,FGF8,GDF2,GNA11,HPS6
GO:BP	regulation of biological process	GO:0050789	0.998829	0.000508906	5675	75	28	12400	ADGRA1,ALOX5,ANXA7,ARHGAP19,AVPI1,CALHM2,CFAP43,FGF8,GDF2,GNA11,HPSE2,KAZALD1,KIF11,KNDC1,LOC100228612,METTL21C,OPN4,PIK3AP1,PPIF,PTCD3,RAB11FIP2,RGR,SFR1,SFRP5,SHISA9,SHLD2,TNFRSF17,UBE2D1
GO:BP	regulation of catalytic activity	GO:0050790	0.998829	0.000508906	1064	75	3	12400	AVPI1,KNDC1,RAB11FIP2
GO:BP	regulation of developmental process	GO:0050793	0.998829	0.000508906	1196	75	5	12400	FGF8,GDF2,GNA11,SFRP5,SHLD2
GO:BP	positive regulation of transferase activity	GO:0051347	0.998829	0.000508906	284	75	1	12400	AVPI1
GO:BP	proteolysis involved in cellular protein catabolic process	GO:0051603	0.998829	0.000508906	361	75	1	12400	UBE2D1
GO:BP	amide biosynthetic process	GO:0043604	0.998829	0.000508906	432	75	1	12400	PTCD3
GO:BP	cellular metabolic process	GO:0044237	0.998829	0.000508906	5542	75	26	12400	ALOX5,ANXA7,AVPI1,DCLRE1A,EXOSC3,FGF8,GDF2,LOC100218933,LOC100228612,LOC105759360,MARCHF8,METTL21C,OGDHL,OPN4,POLL,POLR3GL,PPIF,PPP1R3C,PTCD3,RGR,SFR1,SFRP5,SHLD2,TRUB1,TWNK,UBE2D1
GO:BP	organic substance biosynthetic process	GO:1901576	0.998829	0.000508906	2910	75	10	12400	ALOX5,GDF2,LOC100218933,POLL,POLR3GL,PPP1R3C,PTCD3,SFR1,SFRP5,TWNK
GO:BP	organic substance catabolic process	GO:1901575	0.998829	0.000508906	986	75	1	12400	UBE2D1
GO:BP	positive regulation of catalytic activity	GO:0043085	0.998829	0.000508906	580	75	2	12400	AVPI1,RAB11FIP2
GO:BP	organonitrogen compound biosynthetic process	GO:1901566	0.998829	0.000508906	897	75	1	12400	PTCD3
GO:BP	organonitrogen compound catabolic process	GO:1901565	0.998829	0.000508906	627	75	1	12400	UBE2D1
GO:BP	organonitrogen compound metabolic process	GO:1901564	0.998829	0.000508906	3506	75	15	12400	AVPI1,FGF8,GDF2,LOC100228612,LOC100229828,LOC105759360,MARCHF8,METTL21C,OPN4,PLAU,PPIF,PTCD3,RBP3,RGR,UBE2D1
GO:BP	organic cyclic compound biosynthetic process	GO:1901362	0.998829	0.000508906	1990	75	8	12400	ALOX5,GDF2,LOC100218933,POLL,POLR3GL,SFR1,SFRP5,TWNK
GO:BP	organic cyclic compound metabolic process	GO:1901360	0.998829	0.000508906	2897	75	12	12400	ALOX5,DCLRE1A,EXOSC3,GDF2,LOC100218933,POLL,POLR3GL,SFR1,SFRP5,SHLD2,TRUB1,TWNK
GO:BP	macromolecule metabolic process	GO:0043170	0.998829	0.000508906	4971	75	25	12400	ANXA7,AVPI1,DCLRE1A,EXOSC3,FGF8,GDF2,LOC100229828,LOC105759360,MARCHF8,METTL21C,OPN4,PLAU,POLL,POLR3GL,PPIF,PPP1R3C,PTCD3,RBP3,RGR,SFR1,SFRP5,SHLD2,TRUB1,TWNK,UBE2D1
GO:BP	export from cell	GO:0140352	0.998829	0.000508906	382	75	1	12400	RAB11FIP2
GO:BP	localization within membrane	GO:0051668	0.998829	0.000508906	300	75	1	12400	HPS6
GO:BP	positive regulation of cellular process	GO:0048522	0.998829	0.000508906	2712	75	11	12400	AVPI1,CALHM2,FGF8,GDF2,HPSE2,LOC100228612,PIK3AP1,PPIF,SFR1,SHLD2,UBE2D1
GO:BP	plasma membrane bounded cell projection organization	GO:0120036	0.998829	0.000508906	710	75	1	12400	CFAP43
GO:BP	establishment of localization in cell	GO:0051649	0.998829	0.000508906	964	75	3	12400	LOC100228612,METTL21C,RAB11FIP2
GO:BP	cellular localization	GO:0051641	0.998829	0.000508906	1398	75	4	12400	HPS6,LOC100228612,METTL21C,RAB11FIP2
GO:BP	synaptic signaling	GO:0099536	0.998829	0.000508906	281	75	1	12400	SHISA9
GO:BP	negative regulation of biological process	GO:0048519	0.998829	0.000508906	2596	75	9	12400	ALOX5,ANXA7,FGF8,GDF2,LOC100228612,METTL21C,PPIF,SFRP5,SHLD2
GO:BP	positive regulation of biological process	GO:0048518	0.998829	0.000508906	2953	75	11	12400	AVPI1,CALHM2,FGF8,GDF2,HPSE2,LOC100228612,PIK3AP1,PPIF,SFR1,SHLD2,UBE2D1
GO:BP	nucleic acid-templated transcription	GO:0097659	0.998829	0.000508906	1638	75	5	12400	GDF2,POLR3GL,SFR1,SFRP5,TWNK
GO:BP	regulation of kinase activity	GO:0043549	0.998829	0.000508906	403	75	1	12400	AVPI1
GO:BP	cellular amide metabolic process	GO:0043603	0.998829	0.000508906	556	75	2	12400	LOC100228612,PTCD3
GO:BP	modification-dependent macromolecule catabolic process	GO:0043632	0.998829	0.000508906	308	75	1	12400	UBE2D1
GO:BP	regulation of cellular process	GO:0050794	0.998829	0.000508906	5414	75	27	12400	ADGRA1,ALOX5,ARHGAP19,AVPI1,CALHM2,CFAP43,FGF8,GDF2,GNA11,HPSE2,KAZALD1,KIF11,KNDC1,LOC100228612,METTL21C,OPN4,PIK3AP1,PPIF,PTCD3,RAB11FIP2,RGR,SFR1,SFRP5,SHISA9,SHLD2,TNFRSF17,UBE2D1
GO:BP	system development	GO:0048731	0.998829	0.000508906	2264	75	10	12400	CFAP43,FGF8,GDF2,GNA11,INA,KERA,METTL21C,OPN4,SFRP5,SHLD2
GO:BP	generation of neurons	GO:0048699	0.998829	0.000508906	735	75	1	12400	FGF8
GO:BP	multi-organism reproductive process	GO:0044703	0.998829	0.000508906	355	75	1	12400	CFAP43
GO:BP	localization	GO:0051179	0.998829	0.000508906	3233	75	13	12400	ALOX5,CFAP43,FGF8,GDF2,HPS6,LOC100228612,LOC100229828,LOC100230461,METTL21C,PPIF,RAB11FIP2,SFXN2,SHISA9
GO:BP	establishment of protein localization	GO:0045184	0.998829	0.000508906	737	75	1	12400	RAB11FIP2
GO:BP	leukocyte activation	GO:0045321	0.998829	0.000508906	341	75	1	12400	SHLD2
GO:BP	establishment of localization	GO:0051234	0.998829	0.000508906	2388	75	9	12400	CFAP43,LOC100228612,LOC100229828,LOC100230461,METTL21C,PPIF,RAB11FIP2,SFXN2,SHISA9
GO:BP	developmental growth	GO:0048589	0.998829	0.000508906	339	75	1	12400	FGF8
GO:BP	regulation of cell differentiation	GO:0045595	0.998829	0.000508906	737	75	2	12400	GDF2,GNA11
GO:BP	positive regulation of cell differentiation	GO:0045597	0.998829	0.000508906	416	75	1	12400	GDF2
GO:BP	cellular macromolecule localization	GO:0070727	0.998829	0.000508906	881	75	1	12400	HPS6
GO:BP	protein modification by small protein conjugation or removal	GO:0070647	0.998829	0.000508906	524	75	2	12400	MARCHF8,UBE2D1
GO:BP	regulation of multicellular organismal process	GO:0051239	0.998829	0.000508906	1268	75	4	12400	FGF8,GDF2,SHISA9,SHLD2
GO:BP	regulation of protein metabolic process	GO:0051246	0.998829	0.000508906	1278	75	5	12400	AVPI1,FGF8,GDF2,PTCD3,UBE2D1
GO:BP	membrane organization	GO:0061024	0.998829	0.000508906	328	75	1	12400	PPIF
GO:BP	regulation of RNA metabolic process	GO:0051252	0.998829	0.000508906	1696	75	3	12400	GDF2,SFR1,SFRP5
GO:BP	regulation of protein kinase activity	GO:0045859	0.998829	0.000508906	368	75	1	12400	AVPI1
GO:BP	embryonic morphogenesis	GO:0048598	0.998829	0.000508906	347	75	1	12400	FGF8
GO:BP	positive regulation of RNA metabolic process	GO:0051254	0.998829	0.000508906	904	75	2	12400	GDF2,SFR1
GO:BP	biological regulation	GO:0065007	0.998829	0.000508906	6072	75	30	12400	ADGRA1,ALOX5,ANXA7,ARHGAP19,AVPI1,CALHM2,CFAP43,FGF8,GDF2,GNA11,HPS6,HPSE2,KAZALD1,KIF11,KNDC1,LOC100218933,LOC100228612,METTL21C,OPN4,PIK3AP1,PPIF,PTCD3,RAB11FIP2,RGR,SFR1,SFRP5,SHISA9,SHLD2,TNFRSF17,UBE2D1
GO:BP	protein-containing complex assembly	GO:0065003	0.998829	0.000508906	687	75	2	12400	CHAF1B,TWNK
GO:BP	positive regulation of transcription, DNA-templated	GO:0045893	0.998829	0.000508906	837	75	2	12400	GDF2,SFR1
GO:BP	multicellular organismal reproductive process	GO:0048609	0.998829	0.000508906	305	75	1	12400	CFAP43
GO:BP	regulation of phosphorus metabolic process	GO:0051174	0.998829	0.000508906	736	75	3	12400	AVPI1,FGF8,GDF2
GO:BP	small molecule biosynthetic process	GO:0044283	0.998829	0.000508906	295	75	1	12400	ALOX5
GO:BP	small molecule metabolic process	GO:0044281	0.998829	0.000508906	852	75	3	12400	ALOX5,LOC100218933,LOC100228612
GO:BP	positive regulation of nitrogen compound metabolic process	GO:0051173	0.998829	0.000508906	1523	75	6	12400	AVPI1,FGF8,GDF2,SFR1,SHLD2,UBE2D1
GO:BP	regulation of transferase activity	GO:0051338	0.998829	0.000508906	457	75	1	12400	AVPI1
GO:BP	cellular catabolic process	GO:0044248	0.998829	0.000508906	1007	75	3	12400	ANXA7,LOC100228612,UBE2D1
GO:BP	positive regulation of transport	GO:0051050	0.998829	0.000508906	366	75	1	12400	LOC100228612
GO:BP	anatomical structure formation involved in morphogenesis	GO:0048646	0.998829	0.000508906	586	75	2	12400	FGF8,GDF2
GO:BP	cellular biosynthetic process	GO:0044249	0.998829	0.000508906	2867	75	9	12400	ALOX5,GDF2,POLL,POLR3GL,PPP1R3C,PTCD3,SFR1,SFRP5,TWNK
GO:BP	regulation of cellular component organization	GO:0051128	0.998829	0.000508906	1134	75	4	12400	FGF8,GDF2,KAZALD1,PPIF
GO:BP	cellular protein catabolic process	GO:0044257	0.998829	0.000508906	396	75	1	12400	UBE2D1
GO:BP	negative regulation of cellular component organization	GO:0051129	0.998829	0.000508906	347	75	1	12400	PPIF
GO:BP	positive regulation of nucleobase-containing compound metabolic process	GO:0045935	0.998829	0.000508906	984	75	3	12400	GDF2,SFR1,SHLD2
GO:BP	regulation of hydrolase activity	GO:0051336	0.998829	0.000508906	523	75	1	12400	RAB11FIP2
GO:BP	chromosome organization	GO:0051276	0.998829	0.000508906	590	75	2	12400	CHAF1B,TWNK
GO:BP	cellular macromolecule metabolic process	GO:0044260	0.998829	0.000508906	4225	75	19	12400	AVPI1,DCLRE1A,FGF8,GDF2,LOC105759360,MARCHF8,METTL21C,OPN4,POLL,POLR3GL,PPIF,PPP1R3C,PTCD3,RGR,SFR1,SFRP5,SHLD2,TWNK,UBE2D1
GO:BP	multi-organism process	GO:0051704	0.998829	0.000508906	376	75	1	12400	CFAP43
GO:BP	positive regulation of cellular component organization	GO:0051130	0.998829	0.000508906	528	75	2	12400	FGF8,PPIF
GO:BP	regulation of nitrogen compound metabolic process	GO:0051171	0.998829	0.000508906	2660	75	8	12400	AVPI1,FGF8,GDF2,PTCD3,SFR1,SFRP5,SHLD2,UBE2D1
GO:BP	nitrogen compound transport	GO:0071705	0.998829	0.000508906	885	75	2	12400	RAB11FIP2,SFXN2
GO:BP	organic substance metabolic process	GO:0071704	0.998829	0.000508906	5809	75	30	12400	ALOX5,ANXA7,AVPI1,DCLRE1A,EXOSC3,FGF8,GDF2,LOC100218590,LOC100218933,LOC100219821,LOC100228612,LOC100229828,LOC105759360,MARCHF8,METTL21C,OPN4,PLAU,POLL,POLR3GL,PPIF,PPP1R3C,PTCD3,RBP3,RGR,SFR1,SFRP5,SHLD2,TRUB1,TWNK,UBE2D1
GO:BP	negative regulation of nitrogen compound metabolic process	GO:0051172	0.998829	0.000508906	1143	75	2	12400	GDF2,SHLD2
GO:BP	organic substance transport	GO:0071702	0.998829	0.000508906	1082	75	2	12400	RAB11FIP2,SFXN2
GO:BP	cellular macromolecule catabolic process	GO:0044265	0.998829	0.000508906	564	75	1	12400	UBE2D1
GO:BP	cellular protein metabolic process	GO:0044267	0.998829	0.000508906	2678	75	11	12400	AVPI1,FGF8,GDF2,LOC105759360,MARCHF8,METTL21C,OPN4,PPIF,PTCD3,RGR,UBE2D1
GO:BP	cellular nitrogen compound biosynthetic process	GO:0044271	0.998829	0.000508906	2297	75	7	12400	GDF2,POLL,POLR3GL,PTCD3,SFR1,SFRP5,TWNK
GO:BP	cellular component organization or biogenesis	GO:0071840	0.998829	0.000508906	3104	75	14	12400	BMS1,CFAP43,CHAF1B,EXOSC3,FGF8,GDF2,HPS6,HPSE2,INA,KAZALD1,KIF11,PPIF,PYROXD2,TWNK
GO:BP	negative regulation of cellular process	GO:0048523	0.998829	0.000508906	2391	75	7	12400	FGF8,GDF2,LOC100228612,METTL21C,PPIF,SFRP5,SHLD2
GO:BP	negative regulation of cellular metabolic process	GO:0031324	0.998829	0.000508906	1240	75	3	12400	GDF2,PPIF,SHLD2
GO:BP	cellular response to nitrogen compound	GO:1901699	0.998829	0.000508906	281	75	1	12400	GNA11
GO:BP	biological_process	GO:0008150	0.998829	0.000508906	9530	75	54	12400	ADGRA1,ALOX5,ANXA7,ARHGAP19,AVPI1,BMS1,CALHM2,CFAP43,CHAF1B,COMTD1,DCLRE1A,EXOSC3,FGF8,GDF2,GNA11,HPS6,HPSE2,INA,KAZALD1,KERA,KIF11,KNDC1,LOC100218590,LOC100218933,LOC100219821,LOC100228612,LOC100229828,LOC100230461,LOC105759360,MARCHF8,METTL21C,OGDHL,OPN4,PIK3AP1,PLAU,POLL,POLR3GL,PPIF,PPP1R3C,PTCD3,PYROXD2,RAB11FIP2,RBP3,RGR,SFR1,SFRP5,SFXN2,SHISA9,SHLD2,TNFRSF17,TRUB1,TWNK,UBE2D1,ZNF488
GO:BP	metabolic process	GO:0008152	0.998829	0.000508906	6076	75	33	12400	ALOX5,ANXA7,AVPI1,COMTD1,DCLRE1A,EXOSC3,FGF8,GDF2,LOC100218590,LOC100218933,LOC100219821,LOC100228612,LOC100229828,LOC105759360,MARCHF8,METTL21C,OGDHL,OPN4,PLAU,POLL,POLR3GL,PPIF,PPP1R3C,PTCD3,RBP3,RGR,SFR1,SFRP5,SHLD2,TRUB1,TWNK,UBE2D1,ZNF488
GO:BP	catabolic process	GO:0009056	0.998829	0.000508906	1171	75	3	12400	ANXA7,LOC100228612,UBE2D1
GO:BP	macromolecule catabolic process	GO:0009057	0.998829	0.000508906	659	75	1	12400	UBE2D1
GO:BP	biosynthetic process	GO:0009058	0.998829	0.000508906	2949	75	10	12400	ALOX5,GDF2,LOC100218933,POLL,POLR3GL,PPP1R3C,PTCD3,SFR1,SFRP5,TWNK
GO:BP	macromolecule biosynthetic process	GO:0009059	0.998829	0.000508906	2375	75	8	12400	GDF2,POLL,POLR3GL,PPP1R3C,PTCD3,SFR1,SFRP5,TWNK
GO:BP	response to external stimulus	GO:0009605	0.998829	0.000508906	1001	75	4	12400	ALOX5,OPN4,PIK3AP1,RGR
GO:BP	anatomical structure morphogenesis	GO:0009653	0.998829	0.000508906	1369	75	4	12400	FGF8,GDF2,OPN4,SFRP5
GO:BP	embryo development	GO:0009790	0.998829	0.000508906	613	75	1	12400	FGF8
GO:BP	animal organ morphogenesis	GO:0009887	0.998829	0.000508906	552	75	1	12400	FGF8
GO:BP	tissue development	GO:0009888	0.998829	0.000508906	966	75	4	12400	ANXA7,FGF8,GDF2,METTL21C
GO:BP	regulation of biosynthetic process	GO:0009889	0.998829	0.000508906	1898	75	5	12400	ALOX5,GDF2,PTCD3,SFR1,SFRP5
GO:BP	protein localization	GO:0008104	0.998829	0.000508906	1197	75	2	12400	HPS6,RAB11FIP2
GO:BP	negative regulation of biosynthetic process	GO:0009890	0.998829	0.000508906	750	75	1	12400	GDF2
GO:BP	negative regulation of metabolic process	GO:0009892	0.998829	0.000508906	1452	75	4	12400	ANXA7,GDF2,PPIF,SHLD2
GO:BP	positive regulation of metabolic process	GO:0009893	0.998829	0.000508906	1826	75	6	12400	AVPI1,FGF8,GDF2,SFR1,SHLD2,UBE2D1
GO:BP	negative regulation of signal transduction	GO:0009968	0.998829	0.000508906	653	75	2	12400	PPIF,SFRP5
GO:BP	cellular process	GO:0009987	0.998829	0.000508906	8919	75	47	12400	ADGRA1,ALOX5,ANXA7,ARHGAP19,AVPI1,BMS1,CALHM2,CFAP43,CHAF1B,DCLRE1A,EXOSC3,FGF8,GDF2,GNA11,HPS6,HPSE2,INA,KAZALD1,KIF11,KNDC1,LOC100218933,LOC100228612,LOC100229828,LOC100230461,LOC105759360,MARCHF8,METTL21C,OGDHL,OPN4,PIK3AP1,POLL,POLR3GL,PPIF,PPP1R3C,PTCD3,PYROXD2,RAB11FIP2,RGR,SFR1,SFRP5,SFXN2,SHISA9,SHLD2,TNFRSF17,TRUB1,TWNK,UBE2D1
GO:BP	response to organonitrogen compound	GO:0010243	0.998829	0.000508906	384	75	1	12400	GNA11
GO:BP	gene expression	GO:0010467	0.998829	0.000508906	2816	75	12	12400	ANXA7,EXOSC3,FGF8,GDF2,PLAU,POLR3GL,PTCD3,SFR1,SFRP5,SHLD2,TRUB1,TWNK
GO:BP	regulation of gene expression	GO:0010468	0.998829	0.000508906	2198	75	7	12400	ANXA7,FGF8,GDF2,PTCD3,SFR1,SFRP5,SHLD2
GO:BP	regulation of macromolecule biosynthetic process	GO:0010556	0.998829	0.000508906	1809	75	4	12400	GDF2,PTCD3,SFR1,SFRP5
GO:BP	positive regulation of macromolecule biosynthetic process	GO:0010557	0.998829	0.000508906	949	75	2	12400	GDF2,SFR1
GO:BP	negative regulation of macromolecule biosynthetic process	GO:0010558	0.998829	0.000508906	716	75	1	12400	GDF2
GO:BP	positive regulation of macromolecule metabolic process	GO:0010604	0.998829	0.000508906	1703	75	6	12400	AVPI1,FGF8,GDF2,SFR1,SHLD2,UBE2D1
GO:BP	negative regulation of macromolecule metabolic process	GO:0010605	0.998829	0.000508906	1334	75	3	12400	ANXA7,GDF2,SHLD2
GO:BP	positive regulation of biosynthetic process	GO:0009891	0.998829	0.000508906	1000	75	2	12400	GDF2,SFR1
GO:BP	behavior	GO:0007610	0.998829	0.000508906	304	75	1	12400	OPN4
GO:BP	nervous system development	GO:0007399	0.998829	0.000508906	1096	75	3	12400	CFAP43,FGF8,INA
GO:BP	multicellular organism development	GO:0007275	0.998829	0.000508906	2479	75	10	12400	CFAP43,FGF8,GDF2,GNA11,INA,KERA,METTL21C,OPN4,SFRP5,SHLD2
GO:BP	cell activation	GO:0001775	0.998829	0.000508906	389	75	1	12400	SHLD2
GO:BP	cytokine production	GO:0001816	0.998829	0.000508906	294	75	1	12400	GDF2
GO:BP	regulation of cytokine production	GO:0001817	0.998829	0.000508906	289	75	1	12400	GDF2
GO:BP	immune system process	GO:0002376	0.998829	0.000508906	999	75	3	12400	ALOX5,SHLD2,TNFRSF17
GO:BP	immune system development	GO:0002520	0.998829	0.000508906	478	75	1	12400	SHLD2
GO:BP	regulation of immune system process	GO:0002682	0.998829	0.000508906	525	75	1	12400	SHLD2
GO:BP	positive regulation of immune system process	GO:0002684	0.998829	0.000508906	315	75	1	12400	SHLD2
GO:BP	nucleobase-containing compound metabolic process	GO:0006139	0.998829	0.000508906	2710	75	10	12400	DCLRE1A,EXOSC3,GDF2,POLL,POLR3GL,SFR1,SFRP5,SHLD2,TRUB1,TWNK
GO:BP	chromatin organization	GO:0006325	0.998829	0.000508906	354	75	1	12400	CHAF1B
GO:BP	transcription, DNA-templated	GO:0006351	0.998829	0.000508906	1636	75	5	12400	GDF2,POLR3GL,SFR1,SFRP5,TWNK
GO:BP	regulation of transcription, DNA-templated	GO:0006355	0.998829	0.000508906	1546	75	3	12400	GDF2,SFR1,SFRP5
GO:BP	regulation of transcription by RNA polymerase II	GO:0006357	0.998829	0.000508906	1014	75	1	12400	GDF2
GO:BP	transcription by RNA polymerase II	GO:0006366	0.998829	0.000508906	1058	75	1	12400	GDF2
GO:BP	translation	GO:0006412	0.998829	0.000508906	364	75	1	12400	PTCD3
GO:BP	cellular protein modification process	GO:0006464	0.998829	0.000508906	2117	75	10	12400	AVPI1,FGF8,GDF2,LOC105759360,MARCHF8,METTL21C,OPN4,PPIF,RGR,UBE2D1
GO:BP	protein phosphorylation	GO:0006468	0.998829	0.000508906	921	75	3	12400	AVPI1,FGF8,GDF2
GO:BP	ubiquitin-dependent protein catabolic process	GO:0006511	0.998829	0.000508906	304	75	1	12400	UBE2D1
GO:BP	cellular aromatic compound metabolic process	GO:0006725	0.998829	0.000508906	2806	75	10	12400	DCLRE1A,EXOSC3,GDF2,POLL,POLR3GL,SFR1,SFRP5,SHLD2,TRUB1,TWNK
GO:BP	phosphorus metabolic process	GO:0006793	0.998829	0.000508906	1616	75	4	12400	AVPI1,FGF8,GDF2,LOC105759360
GO:BP	phosphate-containing compound metabolic process	GO:0006796	0.998829	0.000508906	1600	75	4	12400	AVPI1,FGF8,GDF2,LOC105759360
GO:BP	nitrogen compound metabolic process	GO:0006807	0.998829	0.000508906	5165	75	24	12400	AVPI1,DCLRE1A,EXOSC3,FGF8,GDF2,LOC100228612,LOC100229828,LOC105759360,MARCHF8,METTL21C,OPN4,PLAU,POLL,POLR3GL,PPIF,PTCD3,RBP3,RGR,SFR1,SFRP5,SHLD2,TRUB1,TWNK,UBE2D1
GO:BP	transport	GO:0006810	0.998829	0.000508906	2296	75	9	12400	CFAP43,LOC100228612,LOC100229828,LOC100230461,METTL21C,PPIF,RAB11FIP2,SFXN2,SHISA9
GO:BP	immune response	GO:0006955	0.998829	0.000508906	516	75	1	12400	SHLD2
GO:BP	organelle organization	GO:0006996	0.998829	0.000508906	1922	75	9	12400	CFAP43,CHAF1B,FGF8,HPS6,INA,KIF11,PPIF,PYROXD2,TWNK
GO:BP	cell cycle	GO:0007049	0.998829	0.000508906	751	75	2	12400	FGF8,KIF11
GO:BP	cell surface receptor signaling pathway	GO:0007166	0.998829	0.000508906	1259	75	5	12400	ADGRA1,FGF8,GDF2,SFRP5,TNFRSF17
GO:BP	transmembrane receptor protein tyrosine kinase signaling pathway	GO:0007169	0.998829	0.000508906	325	75	1	12400	FGF8
GO:BP	negative regulation of gene expression	GO:0010629	0.998829	0.000508906	460	75	1	12400	ANXA7
GO:BP	response to nitrogen compound	GO:1901698	0.998829	0.000508906	415	75	1	12400	GNA11
GO:BP	regulation of cell communication	GO:0010646	0.998829	0.000508906	1626	75	7	12400	AVPI1,FGF8,GDF2,PIK3AP1,PPIF,SFRP5,SHISA9
GO:BP	regulation of cell death	GO:0010941	0.998829	0.000508906	735	75	3	12400	CALHM2,FGF8,PPIF
GO:BP	multicellular organismal process	GO:0032501	0.998829	0.000508906	3295	75	13	12400	CFAP43,FGF8,GDF2,GNA11,HPS6,INA,KERA,METTL21C,OPN4,RGR,SFRP5,SHISA9,SHLD2
GO:BP	developmental process	GO:0032502	0.998829	0.000508906	2920	75	13	12400	ANXA7,CFAP43,FGF8,GDF2,GNA11,HPS6,INA,KERA,LOC100218933,METTL21C,OPN4,SFRP5,SHLD2
GO:BP	multicellular organism reproduction	GO:0032504	0.998829	0.000508906	308	75	1	12400	CFAP43
GO:BP	RNA biosynthetic process	GO:0032774	0.998829	0.000508906	1645	75	5	12400	GDF2,POLR3GL,SFR1,SFRP5,TWNK
GO:BP	secretion by cell	GO:0032940	0.998829	0.000508906	357	75	1	12400	RAB11FIP2
GO:BP	macromolecule localization	GO:0033036	0.998829	0.000508906	1416	75	2	12400	HPS6,RAB11FIP2
GO:BP	regulation of organelle organization	GO:0033043	0.998829	0.000508906	589	75	2	12400	FGF8,PPIF
GO:BP	cellular protein localization	GO:0034613	0.998829	0.000508906	877	75	1	12400	HPS6
GO:BP	cellular protein-containing complex assembly	GO:0034622	0.998829	0.000508906	432	75	1	12400	CHAF1B
GO:BP	cellular nitrogen compound metabolic process	GO:0034641	0.998829	0.000508906	3119	75	12	12400	DCLRE1A,EXOSC3,GDF2,LOC100228612,POLL,POLR3GL,PTCD3,SFR1,SFRP5,SHLD2,TRUB1,TWNK
GO:BP	cellular macromolecule biosynthetic process	GO:0034645	0.998829	0.000508906	2361	75	8	12400	GDF2,POLL,POLR3GL,PPP1R3C,PTCD3,SFR1,SFRP5,TWNK
GO:BP	nucleobase-containing compound biosynthetic process	GO:0034654	0.998829	0.000508906	1880	75	6	12400	GDF2,POLL,POLR3GL,SFR1,SFRP5,TWNK
GO:BP	regulation of cellular protein metabolic process	GO:0032268	0.998829	0.000508906	1194	75	5	12400	AVPI1,FGF8,GDF2,PTCD3,UBE2D1
GO:BP	regulation of RNA biosynthetic process	GO:2001141	0.998829	0.000508906	1549	75	3	12400	GDF2,SFR1,SFRP5
GO:BP	protein modification process	GO:0036211	0.998829	0.000508906	2117	75	10	12400	AVPI1,FGF8,GDF2,LOC105759360,MARCHF8,METTL21C,OPN4,PPIF,RGR,UBE2D1
GO:BP	regulation of cell motility	GO:2000145	0.998829	0.000508906	471	75	1	12400	GDF2
GO:BP	negative regulation of cellular macromolecule biosynthetic process	GO:2000113	0.998829	0.000508906	711	75	1	12400	GDF2
GO:BP	regulation of cellular macromolecule biosynthetic process	GO:2000112	0.998829	0.000508906	1799	75	4	12400	GDF2,PTCD3,SFR1,SFRP5
GO:BP	regulation of locomotion	GO:0040012	0.998829	0.000508906	497	75	1	12400	GDF2
GO:BP	regulation of multicellular organismal development	GO:2000026	0.998829	0.000508906	636	75	1	12400	GDF2
GO:BP	cell surface receptor signaling pathway involved in cell-cell signaling	GO:1905114	0.998829	0.000508906	283	75	1	12400	SFRP5
GO:BP	positive regulation of nucleic acid-templated transcription	GO:1903508	0.998829	0.000508906	837	75	2	12400	GDF2,SFR1
GO:BP	regulation of nucleic acid-templated transcription	GO:1903506	0.998829	0.000508906	1548	75	3	12400	GDF2,SFR1,SFRP5
GO:BP	positive regulation of RNA biosynthetic process	GO:1902680	0.998829	0.000508906	838	75	2	12400	GDF2,SFR1
GO:BP	chordate embryonic development	GO:0043009	0.998829	0.000508906	406	75	1	12400	FGF8
GO:BP	peptide biosynthetic process	GO:0043043	0.998829	0.000508906	375	75	1	12400	PTCD3
GO:BP	intracellular signal transduction	GO:0035556	0.998829	0.000508906	1334	75	6	12400	AVPI1,FGF8,KNDC1,PIK3AP1,PPIF,SFRP5
GO:BP	positive regulation of cellular biosynthetic process	GO:0031328	0.998829	0.000508906	986	75	2	12400	GDF2,SFR1
GO:BP	negative regulation of cellular biosynthetic process	GO:0031327	0.998829	0.000508906	742	75	1	12400	GDF2
GO:BP	regulation of cellular biosynthetic process	GO:0031326	0.998829	0.000508906	1870	75	4	12400	GDF2,PTCD3,SFR1,SFRP5
GO:BP	protein transport	GO:0015031	0.998829	0.000508906	668	75	1	12400	RAB11FIP2
GO:BP	cellular component organization	GO:0016043	0.998829	0.000508906	3017	75	12	12400	CFAP43,CHAF1B,FGF8,GDF2,HPS6,HPSE2,INA,KAZALD1,KIF11,PPIF,PYROXD2,TWNK
GO:BP	RNA metabolic process	GO:0016070	0.998829	0.000508906	2169	75	7	12400	EXOSC3,GDF2,POLR3GL,SFR1,SFRP5,TRUB1,TWNK
GO:BP	mRNA metabolic process	GO:0016071	0.998829	0.000508906	328	75	1	12400	TRUB1
GO:BP	vesicle-mediated transport	GO:0016192	0.998829	0.000508906	727	75	2	12400	LOC100229828,RAB11FIP2
GO:BP	phosphorylation	GO:0016310	0.998829	0.000508906	1084	75	3	12400	AVPI1,FGF8,GDF2
GO:BP	dephosphorylation	GO:0016311	0.998829	0.000508906	289	75	1	12400	LOC105759360
GO:BP	heterocycle biosynthetic process	GO:0018130	0.998829	0.000508906	1922	75	7	12400	ALOX5,GDF2,POLL,POLR3GL,SFR1,SFRP5,TWNK
GO:BP	regulation of nucleobase-containing compound metabolic process	GO:0019219	0.998829	0.000508906	1815	75	4	12400	GDF2,SFR1,SFRP5,SHLD2
GO:BP	regulation of phosphate metabolic process	GO:0019220	0.998829	0.000508906	735	75	3	12400	AVPI1,FGF8,GDF2
GO:BP	regulation of metabolic process	GO:0019222	0.998829	0.000508906	3158	75	11	12400	ALOX5,ANXA7,AVPI1,FGF8,GDF2,PPIF,PTCD3,SFR1,SFRP5,SHLD2,UBE2D1
GO:BP	aromatic compound biosynthetic process	GO:0019438	0.998829	0.000508906	1926	75	6	12400	GDF2,POLL,POLR3GL,SFR1,SFRP5,TWNK
GO:BP	protein metabolic process	GO:0019538	0.998829	0.000508906	3047	75	14	12400	AVPI1,FGF8,GDF2,LOC100229828,LOC105759360,MARCHF8,METTL21C,OPN4,PLAU,PPIF,PTCD3,RBP3,RGR,UBE2D1
GO:BP	modification-dependent protein catabolic process	GO:0019941	0.998829	0.000508906	304	75	1	12400	UBE2D1
GO:BP	sexual reproduction	GO:0019953	0.998829	0.000508906	313	75	1	12400	CFAP43
GO:BP	neurogenesis	GO:0022008	0.998829	0.000508906	808	75	1	12400	FGF8
GO:BP	cell cycle process	GO:0022402	0.998829	0.000508906	564	75	2	12400	FGF8,KIF11
GO:BP	cellular component assembly	GO:0022607	0.998829	0.000508906	1349	75	4	12400	CFAP43,CHAF1B,KIF11,TWNK
GO:BP	regulation of signaling	GO:0023051	0.998829	0.000508906	1632	75	7	12400	AVPI1,FGF8,GDF2,PIK3AP1,PPIF,SFRP5,SHISA9
GO:BP	negative regulation of signaling	GO:0023057	0.998829	0.000508906	700	75	2	12400	PPIF,SFRP5
GO:BP	cell projection organization	GO:0030030	0.998829	0.000508906	720	75	1	12400	CFAP43
GO:BP	cell differentiation	GO:0030154	0.998829	0.000508906	1855	75	6	12400	ANXA7,CFAP43,FGF8,GDF2,GNA11,HPS6
GO:BP	protein catabolic process	GO:0030163	0.998829	0.000508906	482	75	1	12400	UBE2D1
GO:BP	neuron differentiation	GO:0030182	0.998829	0.000508906	662	75	1	12400	FGF8
GO:BP	regulation of cell migration	GO:0030334	0.998829	0.000508906	449	75	1	12400	GDF2
GO:BP	regulation of cellular metabolic process	GO:0031323	0.998829	0.000508906	2848	75	10	12400	ALOX5,AVPI1,FGF8,GDF2,PPIF,PTCD3,SFR1,SFRP5,SHLD2,UBE2D1
GO:BP	positive regulation of cellular metabolic process	GO:0031325	0.998829	0.000508906	1606	75	6	12400	AVPI1,FGF8,GDF2,SFR1,SHLD2,UBE2D1
GO:BP	negative regulation of cell communication	GO:0010648	0.998829	0.000508906	697	75	2	12400	PPIF,SFRP5
GO:BP	embryo development ending in birth or egg hatching	GO:0009792	0.998829	0.000508906	412	75	1	12400	FGF8

## Sheet: e_GO_PAL_Saddlebrown
source	term_name	term_id	adjusted_p_value	negative_log10_of_adjusted_p_value	term_size	query_size	intersection_size	effective_domain_size	ABTB2	ACTR6	AFAP1L1	AHSG	AIF1L	ANLN	APELA	APOH	ARHGEF28	ARHGEF4	ASIC4	ATP1B1	BARHL2	BARX2	BEND7	C6H10ORF90	CD151	CDH19	CENPF	CEPT1	CHST3	CNKSR3	CNP	CRYAB	CTNNA3	CTTNBP2NL	DAAM2	DUS2	EGFLAM	ELOVL1	EMB	ENPP2	ENPP6	ERMN	EXOG	FA2H	FGFR2	FOXB1	FYCO1	GAB1	GCLC
GO:BP	oligodendrocyte differentiation	GO:0048709	0.000132222	3.8787	55	123	8	12400																							IEA				IDA									IEA
GO:BP	glial cell differentiation	GO:0010001	0.000166889	3.77757	117	123	10	12400																							IEA				IDA									IEA
GO:BP	gliogenesis	GO:0042063	0.000166889	3.77757	147	123	11	12400																							IEA				IDA									IEA
GO:BP	glial cell development	GO:0021782	0.000452145	3.34472	53	123	7	12400																																				IEA
GO:BP	ensheathment of neurons	GO:0007272	0.00111765	2.95169	68	123	7	12400																																				IEA
GO:BP	central nervous system myelination	GO:0022010	0.00111765	2.95169	12	123	4	12400																																				IEA
GO:BP	axon ensheathment	GO:0008366	0.00111765	2.95169	68	123	7	12400																																				IEA
GO:BP	myelination	GO:0042552	0.00111765	2.95169	67	123	7	12400																																				IEA
GO:BP	axon ensheathment in central nervous system	GO:0032291	0.00111765	2.95169	12	123	4	12400																																				IEA
KEGG	Ether lipid metabolism	KEGG:00565	0.00234906	2.62911	22	123	4	12400																				KEGG												KEGG	KEGG
GO:BP	neurogenesis	GO:0022008	0.00278154	2.55572	808	123	22	12400													IDA,IMP										IEA				IDA				IEA					IEA		IEA
GO:BP	cell development	GO:0048468	0.00727618	2.1381	996	123	24	12400													IMP										IEA				IDA				IEA					IEA		IEA
GO:BP	regulation of gliogenesis	GO:0014013	0.00791011	2.10182	40	123	5	12400																											IDA
GO:BP	multicellular organism development	GO:0007275	0.00957872	2.01869	2479	123	43	12400				IEA				IEA					IDA,IMP	IEA					IEA				IEA	IEA			IDA,IMP			IMP	IEA	IEA				IEA	IMP	IEA		IEA
GO:BP	nervous system development	GO:0007399	0.00957872	2.01869	1096	123	25	12400													IDA,IMP						IEA				IEA				IDA,IMP				IEA					IEA		IEA
GO:BP	oligodendrocyte development	GO:0014003	0.00957872	2.01869	23	123	4	12400																																				IEA
GO:BP	anatomical structure development	GO:0048856	0.00957872	2.01869	2728	123	46	12400				IEA				IEA					IDA,IMP	IEA			IEA		IEA				IEA	IEA			IDA,IMP			IMP	IEA	IGI,IEA				IEA	IMP	IEA		IEA
GO:BP	myelin maintenance	GO:0043217	0.00969609	2.0134	9	123	3	12400																																				IEA
GO:BP	system development	GO:0048731	0.011241	1.9492	2264	123	40	12400				IEA				IEA					IDA,IMP	IEA					IEA				IEA	IEA			IDA,IMP			IMP	IEA	IEA				IEA	IMP	IEA		IEA
GO:BP	positive regulation of gliogenesis	GO:0014015	0.011241	1.9492	25	123	4	12400
GO:BP	multicellular organismal process	GO:0032501	0.0117389	1.93037	3295	123	52	12400				IEA		IMP		IEA			IMP	IMP	IDA,IMP	IEA					IEA				IEA	IEA	IMP		IDA,IMP			IMP	IEA	IMP,IEA				IEA	IMP	IEA		IEA	IEA
GO:BP	central nervous system myelin maintenance	GO:0032286	0.0272181	1.56514	3	123	2	12400																																				IEA
GO:BP	microglia development	GO:0014005	0.0272181	1.56514	3	123	2	12400
GO:BP	microglia differentiation	GO:0014004	0.0272181	1.56514	3	123	2	12400
GO:BP	generation of neurons	GO:0048699	0.0292799	1.53343	735	123	18	12400													IDA,IMP										IEA				IDA				IEA							IEA
GO:BP	developmental process	GO:0032502	0.0324571	1.48869	2920	123	46	12400				IEA				IEA					IDA,IMP	IEA			IEA		IEA				IEA	IEA			IDA,IMP			IMP	IEA	IGI,IEA				IEA	IMP	IEA		IEA
GO:BP	protein autoprocessing	GO:0016540	0.0328766	1.48311	15	123	3	12400
GO:BP	cell migration	GO:0016477	0.0500907	1.30024	711	123	17	12400						IMP		IEA					IMP				IEA															IDA,IMP,IEA						IEA		IEA
GO:BP	neuron development	GO:0048666	0.0500907	1.30024	523	123	14	12400													IMP										IEA								IEA							IEA
GO:BP	central nervous system development	GO:0007417	0.0500907	1.30024	463	123	13	12400																			IEA				IEA				IDA,IMP									IEA		IEA
GO:BP	response to heat	GO:0009408	0.0504268	1.29734	41	123	4	12400																																									IEA
GO:BP	movement of cell or subcellular component	GO:0006928	0.0525145	1.27972	997	123	21	12400						IMP		IEA					IMP				IEA								IMP						IEA	IDA,IMP,IEA						IEA	IMP,IEA	IEA
GO:BP	cell projection morphogenesis	GO:0048858	0.0544149	1.26428	303	123	10	12400													IMP										IEA								IEA	IGI						IEA
GO:BP	plasma membrane bounded cell projection morphogenesis	GO:0120039	0.0544149	1.26428	301	123	10	12400													IMP										IEA								IEA	IGI						IEA
GO:BP	cellular component morphogenesis	GO:0032989	0.0544149	1.26428	357	123	11	12400													IMP										IEA								IEA	IGI						IEA
GO:BP	positive regulation of blood vessel endothelial cell proliferation involved in sprouting angiogenesis	GO:1903589	0.0588481	1.23027	5	123	2	12400
GO:BP	cell part morphogenesis	GO:0032990	0.065766	1.182	313	123	10	12400													IMP										IEA								IEA	IGI						IEA
GO:BP	autophagosome maturation	GO:0097352	0.0723734	1.14042	22	123	3	12400																																							IMP,IEA
GO:BP	regulation of sodium ion transmembrane transporter activity	GO:2000649	0.0723734	1.14042	22	123	3	12400												IDA,IMP
GO:BP	peripheral nervous system myelin maintenance	GO:0032287	0.0787043	1.104	6	123	2	12400																																				IEA
GO:BP	cell motility	GO:0048870	0.0873777	1.0586	784	123	17	12400						IMP		IEA					IMP				IEA															IDA,IMP,IEA						IEA		IEA
GO:BP	positive regulation of lipase activity	GO:0060193	0.0873777	1.0586	25	123	3	12400								IEA																													IMP
GO:BP	anatomical structure morphogenesis	GO:0009653	0.0873777	1.0586	1369	123	25	12400								IEA					IMP	IEA			IEA						IEA	IEA							IEA	IGI,IEA					IMP	IEA		IEA
GO:BP	membrane depolarization	GO:0051899	0.0873777	1.0586	24	123	3	12400																																									IEA
GO:BP	localization of cell	GO:0051674	0.0873777	1.0586	784	123	17	12400						IMP		IEA					IMP				IEA															IDA,IMP,IEA						IEA		IEA
GO:BP	neuron projection development	GO:0031175	0.0873777	1.0586	451	123	12	12400													IMP										IEA								IEA							IEA
GO:BP	regulation of sodium ion transmembrane transport	GO:1902305	0.0873777	1.0586	25	123	3	12400												IDA,IMP
GO:BP	bleb assembly	GO:0032060	0.0908379	1.04173	7	123	2	12400						IMP
GO:MF	neurotransmitter receptor regulator activity	GO:0099602	0.0999968	1.00001	4	123	2	12400
GO:MF	acetylcholine receptor regulator activity	GO:0030548	0.0999968	1.00001	4	123	2	12400
GO:BP	neuron projection morphogenesis	GO:0048812	0.111516	0.952662	292	123	9	12400													IMP										IEA								IEA							IEA
GO:BP	locomotion	GO:0040011	0.115955	0.93571	882	123	18	12400						IMP		IEA					IMP				IEA														IEA	IDA,IMP,IEA						IEA		IEA
GO:BP	cellular developmental process	GO:0048869	0.121091	0.916888	1898	123	31	12400													IDA,IMP	IEA									IEA				IDA				IEA	IGI				IEA		IEA
GO:BP	regulation of multicellular organismal process	GO:0051239	0.128803	0.890072	1268	123	23	12400				IEA				IEA				IMP													IMP		IDA					IMP,IEA				IEA				IEA
GO:BP	regulation of lipase activity	GO:0060191	0.131612	0.880703	30	123	3	12400								IEA																													IMP
GO:CC	intercalated disc	GO:0014704	0.135073	0.869433	21	123	3	12400												IMP													IDA
GO:CC	myelin sheath	GO:0043209	0.135073	0.869433	18	123	3	12400																							IEA
GO:BP	regulation of sodium ion transport	GO:0002028	0.141939	0.847899	31	123	3	12400												IDA,IMP
GO:BP	cell morphogenesis	GO:0000902	0.151985	0.818198	498	123	12	12400													IMP										IEA								IEA	IGI						IEA
GO:BP	cell differentiation	GO:0030154	0.151985	0.818198	1855	123	30	12400													IDA,IMP	IEA									IEA				IDA				IEA					IEA		IEA
GO:BP	regulation of multicellular organismal development	GO:2000026	0.152069	0.81796	636	123	14	12400				IEA				IEA																			IDA					IEA								IEA
GO:BP	membrane depolarization during action potential	GO:0086010	0.152069	0.81796	10	123	2	12400
GO:BP	regulation of blood vessel endothelial cell proliferation involved in sprouting angiogenesis	GO:1903587	0.152069	0.81796	10	123	2	12400
GO:BP	regulation of membrane protein ectodomain proteolysis	GO:0051043	0.152069	0.81796	10	123	2	12400
GO:BP	regulation of localization	GO:0032879	0.153822	0.812982	1303	123	23	12400				IEA				IEA				IDA,IMP					IEA							IEA	IMP	IMP						IDA,IMP,IEA									IEA
GO:BP	plasma membrane bounded cell projection organization	GO:0120036	0.155973	0.806952	710	123	15	12400						IMP							IMP										IEA								IEA	IGI						IEA
GO:MF	NADPH phosphatase activity	GO:0102757	0.156004	0.806863	1	123	1	12400
GO:MF	phosphatidylcholine-sterol O-acyltransferase activity	GO:0004607	0.156004	0.806863	1	123	1	12400
GO:MF	signaling receptor regulator activity	GO:0030545	0.156004	0.806863	11	123	2	12400
GO:MF	fatty acid alpha-hydroxylase activity	GO:0080132	0.156004	0.806863	1	123	1	12400																																				IEA
GO:MF	mono-ADP-D-ribose binding	GO:0072571	0.156004	0.806863	1	123	1	12400
GO:MF	ADP-D-ribose binding	GO:0072570	0.156004	0.806863	1	123	1	12400
GO:MF	UTP-monosaccharide-1-phosphate uridylyltransferase activity	GO:0051748	0.156004	0.806863	1	123	1	12400
GO:MF	lipoprotein lipase activator activity	GO:0060230	0.156004	0.806863	1	123	1	12400								IEA
GO:MF	phosphoric diester hydrolase activity	GO:0008081	0.156004	0.806863	65	123	4	12400																							IEA									IEA	IEA
GO:MF	channel regulator activity	GO:0016247	0.156004	0.806863	44	123	3	12400
GO:MF	phosphatidylserine decarboxylase activity	GO:0004609	0.156004	0.806863	1	123	1	12400
GO:MF	sodium channel regulator activity	GO:0017080	0.156004	0.806863	12	123	2	12400
GO:MF	UTP:glucose-1-phosphate uridylyltransferase activity	GO:0003983	0.156004	0.806863	1	123	1	12400
GO:MF	2',3'-cyclic-nucleotide 3'-phosphodiesterase activity	GO:0004113	0.156004	0.806863	1	123	1	12400																							IEA
GO:MF	sedoheptulokinase activity	GO:0050277	0.156004	0.806863	1	123	1	12400
GO:MF	glutamate-cysteine ligase activity	GO:0004357	0.156004	0.806863	1	123	1	12400																																									IEA
GO:MF	glycerophosphocholine cholinephosphodiesterase activity	GO:0047390	0.156004	0.806863	1	123	1	12400																																	IEA
GO:MF	calcium ion binding	GO:0005509	0.156004	0.806863	377	123	10	12400					IEA													IEA											IEA			IDA
GO:MF	NADP phosphatase activity	GO:0019178	0.156004	0.806863	1	123	1	12400
GO:MF	platelet-activating factor acetyltransferase activity	GO:0047179	0.156004	0.806863	1	123	1	12400
GO:BP	plasma membrane organization	GO:0007009	0.159798	0.796429	68	123	4	12400																																				IEA
GO:BP	regulation of glial cell differentiation	GO:0045685	0.16022	0.795284	35	123	3	12400																											IDA
GO:BP	regulation of myeloid cell apoptotic process	GO:0033032	0.16022	0.795284	11	123	2	12400								IEA
GO:BP	negative regulation of cellular process	GO:0048523	0.16022	0.795284	2391	123	36	12400				IEA				IEA						IEA					IEA					IEA		IMP	IDA	IEA									IMP	IEA			IEA
GO:BP	establishment of skin barrier	GO:0061436	0.16022	0.795284	11	123	2	12400																														IMP						IEA
GO:BP	response to leptin	GO:0044321	0.16022	0.795284	11	123	2	12400
GO:BP	cell projection organization	GO:0030030	0.16022	0.795284	720	123	15	12400						IMP							IMP										IEA								IEA	IGI						IEA
GO:CC	glutamate-cysteine ligase complex	GO:0017109	0.160694	0.794002	1	123	1	12400																																									IEA
GO:CC	cell-cell contact zone	GO:0044291	0.160694	0.794002	34	123	3	12400												IMP													IDA
GO:CC	cell periphery	GO:0071944	0.160694	0.794002	2231	123	34	12400					IEA	IDA						IDA,IMP,IGI,IEA				IDA	IEA	IEA					IEA	IEA					IDA		IEA		IEA				IDA
GO:CC	mucin granule	GO:0098594	0.160694	0.794002	1	123	1	12400
GO:CC	lateral plasma membrane	GO:0016328	0.160694	0.794002	28	123	3	12400												IDA
GO:CC	lipoprotein particle	GO:1990777	0.160694	0.794002	12	123	2	12400								IEA
GO:CC	integral component of membrane	GO:0016021	0.160694	0.794002	2774	123	40	12400											IEA	IDA,IMP,IEA					IEA	IEA		IEA										IEA						IEA	IDA,IEA
GO:CC	membrane	GO:0016020	0.160694	0.794002	4512	123	58	12400					IEA						IEA	IDA,IMP,IGI,IEA				IDA	IEA	IEA		IEA	IEA	IEA	IEA	IEA						IEA	IEA		IEA		IEA	IEA	IDA,IEA
GO:CC	azurophil granule membrane	GO:0035577	0.160694	0.794002	1	123	1	12400
GO:CC	intrinsic component of membrane	GO:0031224	0.160694	0.794002	2819	123	40	12400											IEA	IDA,IMP,IEA					IEA	IEA		IEA										IEA						IEA	IDA,IEA
GO:CC	protein-lipid complex	GO:0032994	0.160694	0.794002	13	123	2	12400								IEA
GO:CC	plasma lipoprotein particle	GO:0034358	0.160694	0.794002	12	123	2	12400								IEA
GO:CC	high-density lipoprotein particle	GO:0034364	0.160694	0.794002	9	123	2	12400								IEA
GO:BP	response to temperature stimulus	GO:0009266	0.165486	0.781238	71	123	4	12400																																									IEA
GO:BP	negative regulation of protein metabolic process	GO:0051248	0.165486	0.781238	519	123	12	12400				IEA																				IEA				IEA													IEA
GO:BP	sodium ion transmembrane transport	GO:0035725	0.171022	0.766948	72	123	4	12400											IEA	IDA,IMP,IGI
GO:BP	regulation of water loss via skin	GO:0033561	0.171124	0.766688	12	123	2	12400																														IMP						IEA
GO:BP	neuron differentiation	GO:0030182	0.171124	0.766688	662	123	14	12400													IDA,IMP										IEA								IEA							IEA
GO:BP	regulation of cellular process	GO:0050794	0.171124	0.766688	5414	123	68	12400				IEA		IMP		IEA	IEA	IEA		IDA,IMP	IDA,IMP,IEA	IEA			IEA		IEA			IEA		IEA	IMP	IMP	IDA	IEA	IDA			IDA,IMP,IGI,IEA				IEA	IDA,IMP,IEA	IEA	IMP,IEA	IEA	IEA
GO:BP	response to arsenic-containing substance	GO:0046685	0.171124	0.766688	12	123	2	12400																																									IEA
GO:BP	peripheral nervous system development	GO:0007422	0.171124	0.766688	37	123	3	12400																																				IEA
GO:BP	negative regulation of follicle-stimulating hormone secretion	GO:0046882	0.174971	0.757034	1	123	1	12400
GO:BP	eye photoreceptor cell fate commitment	GO:0042706	0.174971	0.757034	1	123	1	12400
GO:BP	myelination in peripheral nervous system	GO:0022011	0.174971	0.757034	15	123	2	12400																																				IEA
GO:BP	tube morphogenesis	GO:0035239	0.174971	0.757034	476	123	11	12400								IEA																								IEA								IEA
GO:BP	negative regulation of developmental pigmentation	GO:0048086	0.174971	0.757034	1	123	1	12400
GO:BP	hepatocyte growth factor production	GO:0032605	0.174971	0.757034	1	123	1	12400
GO:BP	epithelial cell-cell adhesion	GO:0090136	0.174971	0.757034	13	123	2	12400																									IEA
GO:BP	myeloid cell apoptotic process	GO:0033028	0.174971	0.757034	14	123	2	12400								IEA
GO:BP	negative regulation of eye pigmentation	GO:0048074	0.174971	0.757034	1	123	1	12400
GO:BP	blood vessel endothelial cell proliferation involved in sprouting angiogenesis	GO:0002043	0.174971	0.757034	13	123	2	12400
GO:BP	regulation of hepatocyte growth factor production	GO:0032646	0.174971	0.757034	1	123	1	12400
GO:BP	camera-type eye photoreceptor cell fate commitment	GO:0060220	0.174971	0.757034	1	123	1	12400
GO:BP	mammillary body development	GO:0021767	0.174971	0.757034	1	123	1	12400																																						IEA
GO:BP	behavioral response to nutrient	GO:0051780	0.174971	0.757034	1	123	1	12400
GO:BP	chemical homeostasis	GO:0048878	0.174971	0.757034	491	123	11	12400												IDA,IMP																		IMP						IEA					IEA
GO:BP	macroautophagy	GO:0016236	0.174971	0.757034	120	123	5	12400																																							IMP,IEA
GO:BP	endothelial cell chemotaxis to vascular endothelial growth factor	GO:0090668	0.174971	0.757034	1	123	1	12400																																								IEA
GO:BP	cell chemotaxis to vascular endothelial growth factor	GO:0090667	0.174971	0.757034	1	123	1	12400																																								IEA
GO:BP	neuron projection arborization	GO:0140058	0.174971	0.757034	14	123	2	12400
GO:BP	oogenesis	GO:0048477	0.174971	0.757034	42	123	3	12400
GO:BP	regulation of eye pigmentation	GO:0048073	0.174971	0.757034	1	123	1	12400
GO:BP	negative regulation of hepatocyte growth factor production	GO:0032686	0.174971	0.757034	1	123	1	12400
GO:BP	regulation of membrane depolarization	GO:0003254	0.174971	0.757034	13	123	2	12400																																									IEA
GO:BP	inflammatory response	GO:0006954	0.174971	0.757034	239	123	7	12400				IEA
GO:BP	regulation of bleb assembly	GO:1904170	0.174971	0.757034	1	123	1	12400						IMP
GO:BP	positive regulation of bleb assembly	GO:1904172	0.174971	0.757034	1	123	1	12400						IMP
GO:BP	positive regulation of P-type sodium:potassium-exchanging transporter activity	GO:1903408	0.174971	0.757034	1	123	1	12400												IDA,IMP
GO:BP	positive regulation of oligodendrocyte progenitor proliferation	GO:0070447	0.174971	0.757034	1	123	1	12400
GO:BP	axon target recognition	GO:0007412	0.174971	0.757034	1	123	1	12400																																						IEA
GO:BP	cellular response to interleukin-13	GO:0035963	0.174971	0.757034	1	123	1	12400
GO:BP	vitelline membrane formation	GO:0030704	0.174971	0.757034	1	123	1	12400
GO:BP	response to interleukin-13	GO:0035962	0.174971	0.757034	1	123	1	12400
GO:BP	negative regulation of glial cell differentiation	GO:0045686	0.174971	0.757034	14	123	2	12400																											IDA
GO:BP	regulation of developmental process	GO:0050793	0.174971	0.757034	1196	123	21	12400				IEA				IEA					IMP						IEA								IDA					IGI,IEA								IEA
GO:BP	negative regulation of cellular protein metabolic process	GO:0032269	0.174971	0.757034	489	123	11	12400				IEA																				IEA				IEA													IEA
GO:BP	cell migration in diencephalon	GO:0061381	0.174971	0.757034	1	123	1	12400																																						IEA
GO:BP	regulation of P-type sodium:potassium-exchanging transporter activity	GO:1903406	0.174971	0.757034	1	123	1	12400												IDA,IMP
GO:BP	egg coat formation	GO:0035803	0.174971	0.757034	1	123	1	12400
GO:BP	mammillary axonal complex development	GO:0061373	0.174971	0.757034	1	123	1	12400																																						IEA
GO:BP	epithelial cell migration	GO:0010631	0.174971	0.757034	182	123	6	12400						IMP		IEA																								IMP
GO:BP	plasma membrane lactate transport	GO:0035879	0.174971	0.757034	1	123	1	12400
GO:BP	positive regulation of sodium ion transport	GO:0010765	0.174971	0.757034	13	123	2	12400												IDA,IMP
GO:BP	mammillothalamic axonal tract development	GO:0061374	0.174971	0.757034	1	123	1	12400																																						IEA
GO:BP	photoreceptor cell fate commitment	GO:0046552	0.174971	0.757034	1	123	1	12400
GO:BP	peripheral nervous system axon ensheathment	GO:0032292	0.174971	0.757034	15	123	2	12400																																				IEA
GO:BP	chondroitin sulfate metabolic process	GO:0030204	0.174971	0.757034	15	123	2	12400																					IDA								IDA
GO:BP	epithelium migration	GO:0090132	0.174986	0.756996	184	123	6	12400						IMP		IEA																								IMP
GO:BP	ameboidal-type cell migration	GO:0001667	0.176003	0.754479	241	123	7	12400						IMP		IEA																								IMP
GO:BP	positive regulation of hydrolase activity	GO:0051345	0.178634	0.748036	302	123	8	12400								IEA																													IMP
GO:BP	negative regulation of gliogenesis	GO:0014014	0.182595	0.73851	16	123	2	12400																											IDA
GO:BP	tissue migration	GO:0090130	0.182595	0.73851	187	123	6	12400						IMP		IEA																								IMP
GO:MF	structural constituent of myelin sheath	GO:0019911	0.195155	0.70962	2	123	1	12400
GO:MF	voltage-gated sodium channel activity involved in cardiac muscle cell action potential	GO:0086006	0.195155	0.70962	2	123	1	12400
GO:MF	molecular function regulator	GO:0098772	0.195155	0.70962	516	123	11	12400				IEA					IEA	IEA		IDA,IMP
GO:MF	ion channel regulator activity	GO:0099106	0.195155	0.70962	53	123	3	12400
GO:MF	phosphoric ester hydrolase activity	GO:0042578	0.195155	0.70962	258	123	7	12400																							IEA									IEA	IEA
GO:MF	acetylcholine receptor inhibitor activity	GO:0030550	0.195155	0.70962	2	123	1	12400
GO:MF	histone pre-mRNA DCP binding	GO:0071208	0.195155	0.70962	2	123	1	12400
GO:MF	heme oxygenase (decyclizing) activity	GO:0004392	0.195155	0.70962	2	123	1	12400
GO:MF	glycerophosphodiester phosphodiesterase activity	GO:0008889	0.195155	0.70962	2	123	1	12400																																	IEA
GO:MF	cyclic-nucleotide phosphodiesterase activity	GO:0004112	0.195155	0.70962	19	123	2	12400																							IEA
GO:MF	exonuclease activity	GO:0004527	0.195155	0.70962	51	123	3	12400																																IEA			IEA
GO:MF	U7 snRNA binding	GO:0071209	0.195155	0.70962	2	123	1	12400
GO:MF	chondroitin 6-sulfotransferase activity	GO:0008459	0.195155	0.70962	2	123	1	12400																					IDA
GO:BP	regulation of angiogenesis	GO:0045765	0.1967	0.706196	137	123	5	12400								IEA																								IEA								IEA
GO:BP	Schwann cell development	GO:0014044	0.199342	0.700402	17	123	2	12400																																				IEA
GO:BP	NADP metabolic process	GO:0006739	0.199342	0.700402	17	123	2	12400
HP	Head titubation	HP:0002599	0.20644	0.685207	12	123	3	12400
HP	Peripheral demyelination	HP:0011096	0.20644	0.685207	33	123	4	12400																																				HP
HP	Dysmyelinating leukodystrophy	HP:0006978	0.20644	0.685207	3	123	2	12400																																				HP
GO:MF	cadherin binding	GO:0045296	0.207145	0.683725	23	123	2	12400																									IEA
GO:BP	regulation of vasculature development	GO:1901342	0.209586	0.678639	140	123	5	12400								IEA																								IEA								IEA
GO:CC	lytic vacuole membrane	GO:0098852	0.209854	0.678082	95	123	4	12400
GO:CC	lysosomal membrane	GO:0005765	0.209854	0.678082	95	123	4	12400
GO:CC	plasma membrane	GO:0005886	0.210912	0.675898	2048	123	30	12400					IEA							IDA,IMP,IGI,IEA				IDA		IEA					IEA	IEA							IEA		IEA				IDA
GO:BP	tube development	GO:0035295	0.213664	0.670269	584	123	12	12400								IEA																								IEA						IEA		IEA
GO:BP	regulation of ovulation	GO:0060278	0.214177	0.669227	2	123	1	12400
GO:BP	manganese ion transmembrane transport	GO:0071421	0.214177	0.669227	2	123	1	12400
GO:BP	regulation of histamine secretion by mast cell	GO:1903593	0.214177	0.669227	2	123	1	12400
GO:BP	positive regulation of histamine secretion by mast cell	GO:1903595	0.214177	0.669227	2	123	1	12400
GO:BP	transforming growth factor beta1 activation	GO:0036364	0.214177	0.669227	2	123	1	12400
GO:BP	regulation of body fluid levels	GO:0050878	0.214177	0.669227	145	123	5	12400								IEA																						IMP						IEA		IEA
GO:BP	actin cytoskeleton reorganization	GO:0031532	0.214177	0.669227	57	123	3	12400																																								IEA
GO:BP	pentose-phosphate shunt, non-oxidative branch	GO:0009052	0.214177	0.669227	2	123	1	12400
GO:BP	regulation of transcription from RNA polymerase II promoter in response to iron	GO:0034395	0.214177	0.669227	2	123	1	12400
GO:BP	positive regulation of ovulation	GO:0060279	0.214177	0.669227	2	123	1	12400
GO:BP	regulation of biological process	GO:0050789	0.214177	0.669227	5675	123	69	12400				IEA		IMP		IEA	IEA	IEA		IDA,IMP	IDA,IMP,IEA	IEA			IEA		IEA			IEA		IEA	IMP	IMP	IDA	IEA	IDA			IDA,IMP,IGI,IEA				IEA	IDA,IMP,IEA	IEA	IMP,IEA	IEA	IEA
GO:BP	blood coagulation, intrinsic pathway	GO:0007597	0.214177	0.669227	2	123	1	12400								IEA
GO:BP	regulation of myelination	GO:0031641	0.214177	0.669227	19	123	2	12400
GO:BP	regulation of heart rate by cardiac conduction	GO:0086091	0.214177	0.669227	22	123	2	12400																									IMP
GO:BP	mast cell activation	GO:0045576	0.214177	0.669227	19	123	2	12400
GO:BP	blood vessel morphogenesis	GO:0048514	0.214177	0.669227	329	123	8	12400								IEA																								IEA								IEA
GO:BP	regulation of actin cytoskeleton reorganization	GO:2000249	0.214177	0.669227	21	123	2	12400
GO:BP	positive regulation of epithelial cell migration	GO:0010634	0.214177	0.669227	96	123	4	12400																																IMP
GO:BP	regulation of epithelial cell migration	GO:0010632	0.214177	0.669227	145	123	5	12400								IEA																								IMP
GO:BP	corpora quadrigemina development	GO:0061378	0.214177	0.669227	2	123	1	12400																																						IEA
GO:BP	inferior colliculus development	GO:0061379	0.214177	0.669227	2	123	1	12400																																						IEA
GO:BP	positive regulation of phospholipase activity	GO:0010518	0.214177	0.669227	20	123	2	12400																																					IMP
GO:BP	regulation of membrane depolarization during action potential	GO:0098902	0.214177	0.669227	2	123	1	12400
GO:BP	negative regulation of biological process	GO:0048519	0.214177	0.669227	2596	123	36	12400				IEA				IEA						IEA					IEA					IEA		IMP	IDA	IEA									IMP	IEA			IEA
GO:BP	positive regulation of follicle-stimulating hormone secretion	GO:0046881	0.214177	0.669227	2	123	1	12400
GO:BP	Schwann cell differentiation	GO:0014037	0.214177	0.669227	21	123	2	12400																																				IEA
GO:BP	positive regulation of metalloendopeptidase activity	GO:1904685	0.214177	0.669227	2	123	1	12400
GO:BP	vacuolar transmembrane transport	GO:0034486	0.214177	0.669227	2	123	1	12400
GO:BP	epithelial cell proliferation involved in renal tubule morphogenesis	GO:2001013	0.214177	0.669227	2	123	1	12400
GO:BP	macrophage differentiation	GO:0030225	0.214177	0.669227	20	123	2	12400
GO:BP	positive regulation of multicellular organismal process	GO:0051240	0.214177	0.669227	664	123	13	12400								IEA																																IEA
GO:BP	localization	GO:0051179	0.214177	0.669227	3233	123	43	12400				IEA		IMP		IEA			IEA	IDA,IMP,IGI,IEA	IMP				IEA		IEA					IEA	IMP	IMP						IDA,IMP,IEA						IEA	IMP,IEA	IEA	IEA
GO:BP	positive regulation of potassium ion import across plasma membrane	GO:1903288	0.214177	0.669227	2	123	1	12400												IDA
GO:BP	positive regulation of glial cell differentiation	GO:0045687	0.214177	0.669227	19	123	2	12400
GO:BP	positive regulation of calcium:sodium antiporter activity	GO:1903281	0.214177	0.669227	2	123	1	12400												IMP
GO:BP	action potential	GO:0001508	0.214177	0.669227	58	123	3	12400																									IMP
GO:BP	angiogenesis	GO:0001525	0.214177	0.669227	268	123	7	12400								IEA																								IEA								IEA
GO:BP	heme catabolic process	GO:0042167	0.214177	0.669227	2	123	1	12400
GO:BP	retrograde transport, plasma membrane to Golgi	GO:0035526	0.214177	0.669227	2	123	1	12400
GO:BP	sodium ion transport	GO:0006814	0.214177	0.669227	94	123	4	12400											IEA	IDA,IMP,IGI,IEA
GO:BP	sebaceous gland cell differentiation	GO:0001949	0.214177	0.669227	2	123	1	12400																																				IEA
GO:BP	heme oxidation	GO:0006788	0.214177	0.669227	2	123	1	12400
GO:BP	chondroitin sulfate proteoglycan metabolic process	GO:0050654	0.214177	0.669227	20	123	2	12400																					IDA								IDA
GO:BP	pigment catabolic process	GO:0046149	0.214177	0.669227	2	123	1	12400
GO:BP	protein localization to paranode region of axon	GO:0002175	0.214177	0.669227	2	123	1	12400
GO:BP	glucosylceramide biosynthetic process	GO:0006679	0.214177	0.669227	2	123	1	12400																																				IEA
GO:BP	proteoglycan metabolic process	GO:0006029	0.214177	0.669227	51	123	3	12400																					IDA								IDA
GO:BP	regulation of nervous system development	GO:0051960	0.214177	0.669227	200	123	6	12400																											IDA
GO:BP	cerebellar molecular layer development	GO:0021679	0.214177	0.669227	2	123	1	12400
GO:BP	mitotic nuclear membrane organization	GO:0101024	0.214177	0.669227	2	123	1	12400
GO:BP	cerebellar molecular layer morphogenesis	GO:0021687	0.214177	0.669227	2	123	1	12400
GO:BP	regulation of hydrolase activity	GO:0051336	0.214177	0.669227	523	123	11	12400				IEA				IEA																IEA													IMP
GO:BP	regulation of oligodendrocyte differentiation	GO:0048713	0.214177	0.669227	19	123	2	12400																											IDA
GO:BP	regulation of neurogenesis	GO:0050767	0.214177	0.669227	152	123	5	12400																											IDA
GO:BP	cell communication involved in cardiac conduction	GO:0086065	0.214177	0.669227	20	123	2	12400																									IMP
GO:BP	positive regulation of neurogenesis	GO:0050769	0.214177	0.669227	97	123	4	12400
GO:BP	regulation of calcium:sodium antiporter activity	GO:1903279	0.214177	0.669227	2	123	1	12400												IMP
GO:BP	positive regulation of sodium ion export across plasma membrane	GO:1903278	0.214177	0.669227	2	123	1	12400												IDA
GO:BP	regulation of sodium ion export across plasma membrane	GO:1903276	0.214177	0.669227	2	123	1	12400												IDA
GO:BP	response to cisplatin	GO:0072718	0.214177	0.669227	2	123	1	12400
GO:BP	cellular response to cisplatin	GO:0072719	0.214177	0.669227	2	123	1	12400
GO:BP	heterotypic cell-cell adhesion	GO:0034113	0.214177	0.669227	22	123	2	12400																									IMP
GO:BP	positive regulation of gonadotropin secretion	GO:0032278	0.214177	0.669227	2	123	1	12400
GO:BP	protein processing	GO:0016485	0.214177	0.669227	102	123	4	12400								IEA
GO:BP	dendritic spine morphogenesis	GO:0060997	0.214177	0.669227	22	123	2	12400
GO:BP	regulation of transporter activity	GO:0032409	0.214177	0.669227	102	123	4	12400												IDA,IMP														IMP
GO:BP	mitotic nuclear membrane reassembly	GO:0007084	0.214177	0.669227	2	123	1	12400
HP	Lacrimal gland hypoplasia	HP:0007732	0.215047	0.667467	4	123	2	12400																																					HP
HP	Aplastic/hypoplastic lacrimal glands	HP:0008038	0.215047	0.667467	5	123	2	12400																																					HP
HP	Leukodystrophy	HP:0002415	0.215047	0.667467	78	123	5	12400																																				HP
HP	Titubation	HP:0030187	0.215047	0.667467	20	123	3	12400
HP	Abnormal lacrimal gland morphology	HP:0011482	0.215047	0.667467	5	123	2	12400																																					HP
HP	Radial deviation of the 3rd finger	HP:0009462	0.215047	0.667467	4	123	2	12400																																					HP
HP	Aplasia/Hypoplasia of the proximal phalanx of the thumb	HP:0009629	0.215047	0.667467	5	123	2	12400																																					HP
GO:BP	biological regulation	GO:0065007	0.219654	0.658261	6072	123	72	12400				IEA		IMP		IEA	IEA	IEA		IDA,IMP	IDA,IMP,IEA	IEA			IEA		IEA			IEA		IEA	IMP	IMP	IDA	IEA	IDA	IMP		IDA,IMP,IGI,IEA				IEA	IDA,IMP,IEA	IEA	IMP,IEA	IEA	IEA
GO:BP	regulation of molecular function	GO:0065009	0.220305	0.656976	1410	123	22	12400				IEA				IEA	IEA	IEA		IDA,IMP												IEA		IMP		IEA									IMP
HP	Abnormality of the spinocerebellar tracts	HP:0003133	0.226051	0.645793	9	123	2	12400																																									HP
HP	Anemia due to reduced life span of red cells	HP:0011895	0.226051	0.645793	83	123	4	12400																																									HP
HP	T-wave alternans	HP:0012266	0.226051	0.645793	1	123	1	12400
HP	Ocular anterior segment dysgenesis	HP:0007700	0.226051	0.645793	212	123	7	12400																			HP		HP			HP													HP
HP	Excessive wrinkling of palmar skin	HP:0007605	0.226051	0.645793	8	123	2	12400																																					HP
HP	Pretibial blistering	HP:0012221	0.226051	0.645793	1	123	1	12400																	HP
HP	Abnormal peripheral myelination	HP:0003130	0.226051	0.645793	73	123	4	12400																																				HP
HP	Cerebral dysmyelination	HP:0007266	0.226051	0.645793	12	123	2	12400
HP	Progressive spasticity	HP:0002191	0.226051	0.645793	22	123	3	12400																																				HP
HP	Palmoplantar cutis laxa	HP:0007517	0.226051	0.645793	6	123	2	12400																																					HP
HP	Sternocleidomastoid amyotrophy	HP:0012036	0.226051	0.645793	1	123	1	12400
HP	Cone-shaped epiphysis of the 1st metacarpal	HP:0010017	0.226051	0.645793	1	123	1	12400
HP	Scimitar anomaly	HP:0011626	0.226051	0.645793	1	123	1	12400
HP	Abnormal head movements	HP:0002457	0.226051	0.645793	28	123	3	12400
HP	Progressive spastic quadriplegia	HP:0002478	0.226051	0.645793	7	123	2	12400																																				HP
HP	Spinocerebellar tract degeneration	HP:0002503	0.226051	0.645793	7	123	2	12400																																									HP
HP	Patent urachus	HP:0010479	0.226051	0.645793	1	123	1	12400
HP	Symphalangism affecting the phalanges of the hand	HP:0009773	0.226051	0.645793	10	123	2	12400																																					HP
HP	Cervical C5/C6 vertebrae fusion	HP:0004635	0.226051	0.645793	1	123	1	12400																																					HP
HP	Abnormality of the proximal phalanx of the thumb	HP:0009618	0.226051	0.645793	7	123	2	12400																																					HP
HP	Enlargement of the distal femoral epiphysis	HP:0006438	0.226051	0.645793	1	123	1	12400
HP	Abnormality of the middle phalanges of the toes	HP:0010183	0.226051	0.645793	8	123	2	12400																																					HP
HP	Arthrogryposis multiplex congenita	HP:0002804	0.226051	0.645793	99	123	5	12400
HP	Congenital contracture	HP:0002803	0.226051	0.645793	125	123	5	12400
HP	Abnormality of the epiphysis of the 1st metacarpal	HP:0010014	0.226051	0.645793	1	123	1	12400
HP	Abnormality of the phalanges of the hallux	HP:0010057	0.226051	0.645793	35	123	3	12400																																					HP
HP	Bronchomalacia	HP:0002780	0.226051	0.645793	13	123	2	12400																																					HP
HP	Generalized bone demineralization	HP:0006462	0.226051	0.645793	1	123	1	12400																					HP
HP	Cone-shaped metacarpal epiphyses	HP:0006059	0.226051	0.645793	1	123	1	12400
HP	Deviation of the 3rd finger	HP:0009317	0.226051	0.645793	10	123	2	12400																																					HP
HP	Late-onset spinocerebellar degeneration	HP:0006904	0.226051	0.645793	1	123	1	12400																																									HP
HP	Broad distal hallux	HP:0008111	0.226051	0.645793	1	123	1	12400																																					HP
HP	Spastic paraparesis	HP:0002313	0.226051	0.645793	42	123	3	12400																																				HP
HP	Head tremor	HP:0002346	0.226051	0.645793	29	123	3	12400
HP	Demyelinating peripheral neuropathy	HP:0007108	0.226051	0.645793	36	123	3	12400
HP	Ulnar bowing	HP:0003031	0.226051	0.645793	8	123	2	12400																					HP																HP
HP	Abnormal CNS myelination	HP:0011400	0.226051	0.645793	215	123	7	12400																																				HP
HP	Radial deviation of the 4th finger	HP:0009279	0.226051	0.645793	1	123	1	12400
HP	Broad metacarpal epiphyses	HP:0006146	0.226051	0.645793	1	123	1	12400
HP	Abnormal auditory evoked potentials	HP:0006958	0.226051	0.645793	14	123	2	12400
HP	Intraaxonal accumulation of curvilinear autofluorescent lipopigment storage material	HP:0006916	0.226051	0.645793	1	123	1	12400
HP	Thin proximal phalanges with broad epiphyses of the hand	HP:0006213	0.226051	0.645793	1	123	1	12400
HP	Progressive distal muscle weakness	HP:0009063	0.226051	0.645793	7	123	2	12400																								HP
HP	Long-segment aganglionic megacolon	HP:0011285	0.226051	0.645793	1	123	1	12400
HP	Progressive proximal muscle weakness	HP:0009073	0.226051	0.645793	13	123	2	12400																								HP
HP	Dilated vestibule of the inner ear	HP:0011379	0.226051	0.645793	1	123	1	12400
HP	Metopic depression	HP:0011223	0.226051	0.645793	1	123	1	12400																																					HP
HP	Prominent scrotal raphe	HP:0003246	0.226051	0.645793	1	123	1	12400																																					HP
HP	Confluent hyperintensity of cerebral white matter on MRI	HP:0040330	0.226051	0.645793	1	123	1	12400
HP	Abnormality of the carpal bones	HP:0001191	0.226051	0.645793	59	123	4	12400																					HP																HP
HP	Abnormal tendon morphology	HP:0100261	0.226051	0.645793	557	123	12	12400				HP																	HP			HP													HP
HP	Ectrodactyly	HP:0100257	0.226051	0.645793	51	123	4	12400				HP																																	HP
HP	Synostosis involving bones of the upper limbs	HP:0100238	0.226051	0.645793	80	123	4	12400																					HP																HP
HP	Posterior capsular cataract	HP:0100020	0.226051	0.645793	1	123	1	12400																								HP
HP	Capsular cataract	HP:0100017	0.226051	0.645793	1	123	1	12400																								HP
HP	Abnormal nasolacrimal system morphology	HP:0000614	0.226051	0.645793	44	123	3	12400																	HP																				HP
HP	Synostosis involving bones of the hand	HP:0004278	0.226051	0.645793	35	123	3	12400																																					HP
HP	Skewfoot	HP:0032649	0.226051	0.645793	1	123	1	12400
HP	Alacrima	HP:0000522	0.226051	0.645793	15	123	2	12400																																					HP
HP	Preauricular skin furrow	HP:0004450	0.226051	0.645793	1	123	1	12400																																					HP
HP	Flexion contracture	HP:0001371	0.226051	0.645793	539	123	12	12400				HP																	HP			HP													HP
HP	Neck muscle weakness	HP:0000467	0.226051	0.645793	61	123	4	12400																								HP												HP
HP	Non-acidotic proximal tubulopathy	HP:0005574	0.226051	0.645793	1	123	1	12400
HP	Hyperintensity of cerebral white matter on MRI	HP:0030890	0.226051	0.645793	36	123	3	12400																							HP
HP	Hemolytic anemia	HP:0001878	0.226051	0.645793	83	123	4	12400																																									HP
HP	Dysplastic tricuspid valve	HP:0030732	0.226051	0.645793	1	123	1	12400
HP	Accumulation of muscle fiber desmin	HP:0030225	0.226051	0.645793	1	123	1	12400																								HP
HP	Abnormal muscle fiber desmin	HP:0030224	0.226051	0.645793	1	123	1	12400																								HP
HP	Mitochondrial depletion	HP:0030059	0.226051	0.645793	1	123	1	12400
HP	Incomplete ossification of pubis	HP:0030042	0.226051	0.645793	1	123	1	12400																																					HP
HP	Small finger	HP:0030033	0.226051	0.645793	1	123	1	12400
HP	Abnormal 3rd finger morphology	HP:0004150	0.226051	0.645793	15	123	2	12400																																					HP
HP	Bilateral elbow dislocations	HP:0005021	0.226051	0.645793	1	123	1	12400																					HP
HP	Hallux valgus	HP:0001822	0.226051	0.645793	42	123	3	12400																					HP																HP
HP	Congenital laryngeal stridor	HP:0004886	0.226051	0.645793	1	123	1	12400
HP	Acrobrachycephaly	HP:0004487	0.226051	0.645793	1	123	1	12400																																					HP
HP	Reduction of oligodendroglia	HP:0100709	0.226051	0.645793	1	123	1	12400
HP	Abnormal morphology of musculature of pharynx	HP:0430015	0.226051	0.645793	1	123	1	12400
HP	Abnormal oligodendroglia morphology	HP:0100706	0.226051	0.645793	1	123	1	12400
HP	Hepatopulmonary fusion	HP:0410259	0.226051	0.645793	1	123	1	12400
HP	Abnormal enchondral ossification	HP:0003336	0.226893	0.644179	85	123	4	12400																					HP																HP
GO:BP	membrane repolarization	GO:0086009	0.22848	0.641153	23	123	2	12400												IDA
GO:BP	positive regulation of Ras protein signal transduction	GO:0046579	0.22848	0.641153	23	123	2	12400
GO:BP	regulation of biological quality	GO:0065008	0.229734	0.638776	1841	123	27	12400								IEA				IDA,IMP	IMP											IEA	IMP					IMP						IEA		IEA			IEA
GO:BP	histamine production involved in inflammatory response	GO:0002349	0.23573	0.627586	3	123	1	12400
GO:BP	homeostatic process	GO:0042592	0.23573	0.627586	868	123	15	12400												IDA,IMP																		IMP						IEA					IEA
GO:BP	histamine secretion involved in inflammatory response	GO:0002441	0.23573	0.627586	3	123	1	12400
GO:BP	positive regulation of neutrophil apoptotic process	GO:0033031	0.23573	0.627586	3	123	1	12400
GO:BP	regulation of cellular component movement	GO:0051270	0.23573	0.627586	504	123	10	12400								IEA									IEA								IMP							IDA,IMP,IEA
GO:BP	histamine secretion by mast cell	GO:0002553	0.23573	0.627586	3	123	1	12400
GO:BP	epithelial cell differentiation involved in mammary gland alveolus development	GO:0061030	0.23573	0.627586	3	123	1	12400																																						IEA
GO:BP	tRNA dihydrouridine synthesis	GO:0002943	0.23573	0.627586	3	123	1	12400																												IEA
GO:BP	membrane biogenesis	GO:0044091	0.23573	0.627586	27	123	2	12400
GO:BP	wound healing involved in inflammatory response	GO:0002246	0.23573	0.627586	3	123	1	12400
GO:BP	sulfur compound biosynthetic process	GO:0044272	0.23573	0.627586	63	123	3	12400																					IDA									IEA											IEA
GO:BP	galactosylceramide biosynthetic process	GO:0006682	0.23573	0.627586	3	123	1	12400																																				IEA
GO:BP	porphyrin-containing compound catabolic process	GO:0006787	0.23573	0.627586	3	123	1	12400
GO:BP	tetrapyrrole catabolic process	GO:0033015	0.23573	0.627586	3	123	1	12400
GO:BP	negative regulation of immature T cell proliferation	GO:0033087	0.23573	0.627586	3	123	1	12400
GO:BP	negative regulation of mitochondrial outer membrane permeabilization involved in apoptotic signaling pathway	GO:1901029	0.23573	0.627586	3	123	1	12400																																									IEA
GO:BP	histamine secretion	GO:0001821	0.23573	0.627586	3	123	1	12400
GO:BP	regulation of lysosomal protein catabolic process	GO:1905165	0.23573	0.627586	3	123	1	12400
GO:BP	long-chain fatty-acyl-CoA biosynthetic process	GO:0035338	0.23573	0.627586	3	123	1	12400																														IEA
GO:BP	negative regulation of smooth muscle cell apoptotic process	GO:0034392	0.23573	0.627586	3	123	1	12400								IEA
GO:BP	negative regulation of secretion by cell	GO:1903531	0.23573	0.627586	64	123	3	12400
GO:BP	regulation of potassium ion import	GO:1903286	0.23573	0.627586	3	123	1	12400												IDA
GO:BP	regulation of fibrinolysis	GO:0051917	0.23573	0.627586	3	123	1	12400								IEA
GO:BP	regulation of follicle-stimulating hormone secretion	GO:0046880	0.23573	0.627586	3	123	1	12400
GO:BP	negative regulation of fibrinolysis	GO:0051918	0.23573	0.627586	3	123	1	12400								IEA
GO:BP	choline metabolic process	GO:0019695	0.23573	0.627586	3	123	1	12400																																	IEA
GO:BP	negative regulation of peptidyl-serine dephosphorylation	GO:1902309	0.23573	0.627586	3	123	1	12400
GO:BP	fatty-acyl-CoA biosynthetic process	GO:0046949	0.23573	0.627586	3	123	1	12400																														IEA
GO:BP	galactolipid biosynthetic process	GO:0019375	0.23573	0.627586	3	123	1	12400																																				IEA
GO:BP	positive regulation of autophagosome maturation	GO:1901098	0.23573	0.627586	3	123	1	12400																																							IMP,IEA
GO:BP	positive regulation of Rac protein signal transduction	GO:0035022	0.23573	0.627586	3	123	1	12400
GO:BP	positive regulation of biological process	GO:0048518	0.23573	0.627586	2953	123	39	12400				IEA		IMP		IEA				IDA,IMP	IDA,IMP	IEA			IEA										IDA		IDA			IDA,IMP,IGI					IDA,IMP,IEA		IMP,IEA	IEA	IEA
GO:BP	negative regulation of immature T cell proliferation in thymus	GO:0033088	0.23573	0.627586	3	123	1	12400
[truncated: 4,449 more rows]
[truncated: 82 more columns]

## Sheet: f_GO_PAL_blue
source	term_name	term_id	adjusted_p_value	negative_log10_of_adjusted_p_value	term_size	query_size	intersection_size	effective_domain_size	intersections
[truncated: 55 more rows]

[truncated: 4 more sheets: g_GO_PAL_Darkolivegreen, h_GO_PAL_Darkturqouse, i_GO_PAL_Darkgreen, j_Module_Gene_Correlations]
