# Supplementary material for: Transcriptomic changes in the testes and brain associated with sperm competition risk in male zebra finches
Source: Research Square preprint supplement (doi:10.21203/rs.3.rs-3456692/v1), 2023-11-28
Supplement: Supplementary file 3 [file c9e897aa0454708f81b94df7.xlsx]

## Sheet: a_Modules_Treatment_ANOVA
Modules	# Genes	F	p	Qval	Factor
OT Salmon	255	5.054	0.0286	0.6493	Treatment
OT Thistle1	48	4.43	0.0399	0.6493	Treatment
OT Lightyellow	190	4.066	0.0487	0.6493	Treatment
OT Green	2396	2.905	0.094	0.94	Treatment
OT Black	763	2.407	0.1265	0.9583	Treatment
OT Darkgrey	150	1.915	0.172	0.9583	Treatment
OT Maroon	38	1.367	0.2474	0.9583	Treatment
OT Palevioletred3	40	1.218	0.2746	0.9583	Treatment
OT Paleturquoise	120	0.979	0.3268	0.9583	Treatment
OT Salmon4	46	0.885	0.3509	0.9583	Treatment
OT Magenta	399	0.855	0.3592	0.9583	Treatment
OT Bisque4	57	0.825	0.3676	0.9583	Treatment
OT Purple	306	0.768	0.3848	0.9583	Treatment
OT Mediumpurple3	82	0.633	0.4297	0.9583	Treatment
OT Orange	150	0.583	0.4485	0.9583	Treatment
OT Plum2	49	0.535	0.4678	0.9583	Treatment
OT Floralwhite	75	0.403	0.528	0.9583	Treatment
OT Lightsteelblue1	79	0.345	0.5595	0.9583	Treatment
OT Orangered4	82	0.291	0.5919	0.9583	Treatment
OT Darkorange	149	0.274	0.6028	0.9583	Treatment
OT Darkslateblue	55	0.257	0.6139	0.9583	Treatment
OT Saddlebrown	126	0.242	0.625	0.9583	Treatment
OT Pink	712	0.226	0.6363	0.9583	Treatment
OT Midnightblue	3417	0.211	0.6476	0.9583	Treatment
OT Darkmagenta	97	0.197	0.659	0.9583	Treatment
OT Thistle2	49	0.17	0.682	0.9583	Treatment
OT Skyblue	133	0.157	0.6936	0.9583	Treatment
OT Blue	3228	0.157	0.6936	0.9583	Treatment
OT Cyan	244	0.121	0.7289	0.9583	Treatment
OT Darkturquoise	162	0.1	0.7527	0.9583	Treatment
OT Brown4	73	0.081	0.7767	0.9583	Treatment
OT Navajowhite2	40	0.072	0.7889	0.9583	Treatment
OT Plum1	476	0.064	0.801	0.9583	Treatment
OT Lightcyan1	3324	0.036	0.8501	0.9583	Treatment
OT Grey60	207	0.03	0.8625	0.9583	Treatment
OT Greenyellow	283	0.03	0.8625	0.9583	Treatment
OT Lightpink4	37	0.02	0.8873	0.9592	Treatment
OT Darkgreen	305	0.002	0.9623	0.987	Treatment
OT Sienna3	90	0.002	0.9623	0.987	Treatment
OT Darkolivegreen	107	0	1	1	Treatment

## Sheet: b_Gene_IDs
OT Salmon	OT Thistle1	OT Lightyellow	OT Green	OT Black	OT Darkgrey	OT Maroon	OT Palevioletred3	OT Paleturquoise	OT Salmon4	OT Magenta	OT Bisque4	OT Purple	OT Mediumpurple3	OT Orange	OT Plum2	OT Floralwhite	OT Lightsteelblue1	OT Orangered4	OT Darkorange	OT Darkslateblue	OT Saddlebrown	OT Pink	OT Midnightblue	OT Darkmagenta	OT Thistle2	OT Skyblue	OT Blue	OT Cyan	OT Darkturquoise	OT Brown4	OT Navajowhite2	OT Plum1	OT Lightcyan1	OT Grey60	OT Greenyellow	OT Lightpink4	OT Darkgreen	OT Sienna3	OT Darkolivegreen
ACSS3	ADGB	AGRP	ABCA4	AAK1	AASDHPPT	AIFM2	CALHM4	AACS	ACTC1	ADPRS	ABCA12	ABCB5	ADCY7	ABCC8	ARL8A	ARHGEF37	AICDA	AADAC	ABTB2	ACYP2	ABCF2	ABHD10	AAGAB	AARS2	LOC100220454	APLN	AADAT	ABCA2	ACTN2	AKAP8L	ANO8	A2M	A1CF	ABCB7	ACACB	AHSA2P	ABHD11	ABCD4	ABCB11
ADAMTS7	AGBL2	ALDH1A1	ABCA7	ABCC3	ACE2	AKIP1	CCDC112	ACTA1	AGTR2	AGR3	ACKR3	ACAD11	ADGRG1	ACAT2	BCAS2	BNIP1	AP1S2	ADTRP	AMPD3	ALDH8A1	AEBP2	ACBD7	AAMDC	ABCC10	LOC100220813	B4GALNT3	AATF	ACVR1	ADGRG6	AURKA	ARAP3	ABR	A4GNT	ADGRV1	ADAM12	BAG3	ABI1	ACYP1	ACER1
ADCK2	ANKRD66	BSX	ABCB10	ABCG5	ADPRHL1	ANO1	CDK7	ACTR2	AKAP14	AKAP13	AK8	ACOT13	AMFR	ACOT7	CSRP1	BRD8	AQP11	ALDH1A3	ARG2	BST1	ANKRD11	ACP6	AANAT	ABCG8	LOC100222056	C1H13orf42	ABAT	ADAMTS1	ADI1	BARX1	ARFIP1	ACACA	AAAS	ALKBH8	ADAMTSL3	CRELD2	ACP1	ADCK1	ACMSD
ADSL	ANXA2	C22H8orf58	ABCG2	ACER2	ANGPTL5	APIP	CSNK1G1	ADAMTS10	AMN	ALKBH4	ATIC	ADHFE1	ARL2BP	ADCY2	DCST1	C1QTNF2	ASMTL	B3GALT5	ARL14EP	CAPN11	ANKRD12	ACTR8	AARS1	ASIP	LOC100226816	C1QTNF3	ABCA3	ADIPOR2	AFG1L	BRDT	ARMH4	ACSBG1	AAMP	ANKDD1B	ADGRA2	DGKQ	ACSL1	ALKBH1	AOX1
APAF1	ARMC4	CACNG2	ABHD15	ACKR4	ARHGAP20	C5H15orf41	CZH5orf51	ADK	BDKRB1	ANKRD49	FTCD	AGMO	ATP6V0D1	ADGRB3	DRAM2	CAMLG	C1R	BDH1	ASCL3	CAPN14	ARID4A	ADCY9	AASDH	BVES	LOC100229431	C8H1orf112	ABCA5	ADRB1	AHI1	C2H9orf152	ASTN2	ACTR3	AAR2	ANKRA2	ADGRD1	DNAJA1	ACSL3	AP4S1	ASB12
APPL2	C15H22orf15	CAPN3	ABHD17C	ACOD1	ARL13B	CAT	F2R	ADSS2	CABP2	ANKRD6	HACD2	ALDH5A1	B3GNT9	ADRA2C	DYRK3	CCNG1	CCDC138	CDHR4	BBOX1	CCDC39	ARID4B	AGAP1	AASS	C3AR1	LOC100231785	CA14	ABCB9	AEN	ANGPT2	CCDC63	BRD7	ADGRB1	AATK	APCDD1	AEBP1	DNAJA4	ADAM10	BATF	ASDURF
ASCL4	CAPSL	CARTPT	ABHD2	ACRBP	BEND2	CCDC32	FBXO4	AIG1	CELF1	AP5S1	HSPBAP1	ALKAL1	BBS2	ALK	ELAPOR1	CDC23	CD80	CEBPZ	BDNF	CCN6	ARRB1	AGO3	ABCA1	CEP162	LOC101233369	CAMKMT	ABCD2	AFAP1L1	ANHX	CCDC71L	C11H16orf87	ADNP	ABCB1	ARL14EPL	AHNAK	DNAJB9	AGPS	C5H11orf94	C7H2orf69
ASZ1	CCDC166	CCKAR	ABLIM2	ACSS1	BTBD18	CCDC86	GNE	ALG12	CHAC1	APOOL	INSRR	ANGPT1	BCO1	AMIGO2	ELF3	CPEB4	CDC16	CETP	C5H11orf91	CD93	ATRX	AHSA1	ABCA13	COQ3	LOC101233579	CNGA4	ABCD3	AIF1L	ARMC2	DCUN1D3	CELF3	AHCYL2	ABCB6	ARSB	AKNA	ENOX1	AK5	C5H14orf180	CHN1
BRAF	CCDC17	CGA	ACLY	ADAMTS14	CCDC83	DENND2B	IFT74	AP1M1	CIPC	ARHGEF4	INTS9	ANKRD29	CA5A	ANK1	FAM72A	CREBRF	CENPJ	CFTR	CCDC34	COG2	B4GALNT4	AK3	ABCB8	COQ8A	LOC105760005	DARS1	ABCG1	APLP2	ARMT1	DNAJB8	CNTNAP1	AIMP2	ABCF1	ARSK	ALCAM	FXR1	ALDH1L2	CCDC177	CIR1
C1AH12orf4	CCDC170	CHRNA3	ACSBG2	ADAMTS15	CCDC89	DTD2	LOC100219012	ARAP1	DDX24	ASTN1	ITGB5	ANKRD46	CBFB	AP3M2	KCTD20	DOK3	CFAP91	CHAD	CCND1	CPN2	B4GALT2	AKTIP	ABCC2	CRIPT	LOC105760267	DDX18	ABCG4	ARHGEF28	ASRGL1	E2F8	CUL1	ALMS1	ABHD12	CBWD1	ALDH1A2	HERPUD1	ANGEL2	CINP	CWC22
C1AH12orf66	CDHR3	DBH	ACSF2	ADAP2	CCDC90B	GPR176	LOC100232251	ARMC1	DPH6	ATOX1	LOC100223706	ASTE1	CCDC102A	ARHGEF9	LOC100221146	EIF4E1B	CLN5	CLIC6	CD44	DTL	BAP1	ALG5	ABCC4	DDO	LOC115490868	EPHX2	ABHD6	ATF3	ATP6V1C2	EPHA8	ERGIC2	AMBRA1	ABHD14A	CCDC152	ALX4	HSP90AA1	ANKS1B	CLEC14A	DNAJC10
C1AH12orf73	CERKL	DDC	ACSL4	ADCY5	CCNA1	IRAG1	LOC115490957	ATP1B1	FAM98B	ATP6AP1	LOC100230707	ATAD2	CIDEC	ARMC8	LOC100221733	ERGIC1	COMMD6	CLTRN	CHID1	DZANK1	BBX	AMACR	ABCC5	DSE	LOC115491594	GPR88	ABI2	ATP1A1	BCKDHB	ERICH6	GANAB	AMIGO3	ABHD14B	CDC42SE2	ANGPTL2	HSP90B1	AQP9	COQ6	DPP10
C1AH12orf75	CFAP46	DLX3	ACTR3B	ADD3	CDADC1	IVD	LOC115491068	ATP1B3	FEN1	B3GAT2	LOC100231735	ATP6V0D2	CMTR2	ARNTL	LOC100223070	FAM114A2	CUL4A	COL4A4	CTSD	EGLN1	BCL2	AMPH	ABCC9	EPM2A	LOC115491660	ILVBL	ABI3BP	C2CD2	BPNT1	FAM155A	GIN1	AMPD2	ABHD17A	CENPH	ANTXR2	HSPA2	ARHGEF3	CX3CR1	DPP4
C1AH22orf23	CFAP47	DMRT3	ACTR6	ADGRL4	CEP126	LOC100218133	LOC115491080	AUH	GEMIN2	BLMH	LOC105759403	ATP9B	CNGB1	BCL11B	LOC115493412	FAXDC2	DCUN1D2	CPA6	DENND5A	ENTPD2	BOD1L1	ANAPC10	ABCE1	ERCC5	LOC115491674	LOC100221701	ABL2	C6H10orf90	C3H1orf131	FNDC11	GIPC1	ANKRD13C	ABHD5	CEP120	ANXA1	HSPA4	ARL15	DCAF4	DUSP19
C1QTNF6	CYP11A1	DMRTA2	ACVR1C	AKAP17A	CFAP44	LOC100229562	LOC115491119	BAIAP2	GSKIP	BMPR2	LOC115490572	BAALC	COTL1	BEGAIN	LOC115493413	FGD2	FAM124A	CRYAA	DNAJC24	ENTPD6	C14H7orf26	ANKRD52	ABHD12B	FAM120B	LOC115492295	LOC100221949	ABLIM3	CA4	C3H1orf198	GPS1	HCN2	AP1B1	ABHD8	CHRNB3	AP1AR	HSPA5	ARPP19	DDB2	ESYT3
CBY1	DNAAF6	DRGX	ACVR2B	ALG9	CKAP2	LOC100230575	LOC115491139	BOC	LOC100219030	BORCS5	LOC115490699	BLOC1S4	DHX38	C2CD5	LOC115493964	GABRG2	FARP1	DHRS9	EPHA2	EPHX1	CAAP1	ANKRD9	ABHD13	FANCL	LOC115492297	LOC100222682	ABRACL	CAB39	C3H6orf58	HK3	KCNH2	APC2	ABITRAM	CHRND	APCDD1L	HSPA8	ASCC2	DEGS2	FAM181A
CCDC107	DNAH1	FAM3D	ADAMTS2	ALOX5AP	CRACDL	LOC115490544	LOC115491190	CBFA2T3	LOC100219548	BPHL	LOC115490891	BLOC1S5	DRC7	CADPS	LOC115495565	GNPDA1	GAS6	DLEC1	F13A1	FAM161A	CDK8	AP3D1	ABHD17B	FRMD1	LOC115492350	LOC100223636	ABTB1	CABIN1	CALHM5	KATNA1	KIAA0100	ARF4	ABL1	CILP	ARHGAP28	HSPD1	ASPH	DGKZ	FASTKD1
CCT2	FOXJ1	FAM76A	ADAMTS3	ANKRD35	CRACR2A	LOC115493637	LOC115491229	CFL2	LOC100232496	C1H3orf52	LOC115490939	BPNT2	ELMO3	CAMK2G	LOC115497604	HBEGF	GCC2	ERICH5	FGF19	GPR137B	CELF2	ARC	ABHD18	GABRR1	LOC115492816	LOC100224239	ACADS	CACNA1H	CCNC	KIF2C	KLHL18	ARFGAP1	ABRAXAS1	COMMD10	ARL13A	HSPH1	ATF2	EAPP	FASTKD2
CELSR1	FRMPD2	FERD3L	ADAMTS9	APBA3	CYFIP1	LOC115493651	LOC115491277	CPB1	LOC101234143	C2H18orf63	LOC115490940	BRD9	FANCA	CAMK2N1	LOC115498471	HMMR	GLRA2	FREM2	FGF3	HAO1	CELF4	ARL6IP4	ABI3	GJE1	LOC115493001	LOC100225575	ACAN	CCDC13	CCR6	LOC100219532	LOC100223308	ARHGEF12	ABRAXAS2	CREB3	ARL6IP5	HYOU1	ATN1	ECT2	GPR1
CENPM	IRAK2	FEV	ADAMTSL2	APBB1IP	DDX10	LOC115493709	LOC115492501	CPNE3	LOC101234163	C5	LOC115491104	BTD	GALNS	CAMK4	LOC115498551	IL12B	GPC5	HEPH	FIBIN	HINT3	CHD1	ARL9	ABLIM1	GLO1	LOC115493232	LOC100226082	ACOT9	CD151	CENPW	LOC100219846	LOC115490942	ARID1A	ABT1	CRYZ	ASPDH	LAMC2	B3GALT1	EIF2AK4	GTF3C3
CHPT1	LOC100232083	FEZF1	ADAP1	APOF	DHRS12	LOC115494942	LOC115493817	DNAH7	LOC105759318	CADM3	LOC115491136	C2H18orf21	GINS3	CAMTA1	LOC115498553	KCTD16	GRTP1	HTR2B	FSHB	LAMP5	CHIC2	ARPC4	ACAA2	GLP1R	LOC115493233	LOC100226943	ACOX3	CDH10	CFAP206	LOC100221395	LOC115492023	ARL5B	ACAA1	CSNK1G3	ATP10A	LOC100190429	B4GAT1	ENTPD5	HAT1
CHRM2	LOC105760877	FGR	ADARB2	ARHGAP15	DIAPH3	LOC115495395	LOC115495557	DNAJA2	LOC115495517	CASP3	LOC115491524	C2H5orf22	HSBP1	CASKIN2	LOC115498583	KIF20A	IL18R1	IGFBP7	GALC	LOC100220068	CLCN7	ASB5	ACAD10	KAT14	LOC115493829	LOC100227297	ACP2	CDH19	COL9A1	LOC100223710	LOC115493013	ARL6	ACADSB	CZH9orf64	ATP2C2	LOC105759762	BCAT1	F2	HIBCH
CLRN1	LOC115491258	FOXA1	ADCY1	ARHGAP25	DNAJB13	LOC115495653	LOC115497389	DOK1	LOC115495520	CD96	LOC115491887	C2H7orf25	HSD17B2	CCDC85C	LOC116808444	LARS1	IL1R1	ITGBL1	GATD1	LOC100220807	CMTM4	ASXL1	ACAD8	KLHL31	LOC115494575	LOC100228957	ACSL6	CDR2L	COLEC11	LOC100224784	LOC115493164	ASH1L	ACAP2	DDX4	BMP2	LOC115493443	BCLAF3	GJD2	IFIH1
CMAS	LOC115492069	FOXA2	ADCY8	ARHGAP27	DRC1	LOC116807600	LOC116806727	DYNLL2	LOC115495562	CDO1	LOC115493404	C2H8orf37	HSDL1	CHN2	LOC116808599	LOC100221179	KLHL15	KCNJ13	GPX2	LOC100228630	CNOT4	ATF4	ACAD9	LCA5	LOC115495071	LOC100229443	ACTA2	CEBPA	CRYBG1	LOC100224801	LSM14A	ATP23	ACBD3	DEPDC1B	BMP3	LOC115494700	BMT2	GPN1	IL20RB
COG5	LOC115492191	FOXD3	ADCYAP1	ARHGAP45	ECRG4	LOC116808452	LOC116806783	EIF4E	LOC115495575	CEP135	LOC115493466	CABLES1	HSF4	CLDN19	LOC116809276	LOC100221968	LOC100221480	KIF9	HARBI1	LOC105759064	CPEB2	ATG4A	ACADL	LOC100219265	LOC116806810	LOC100230782	ACTB	CERS2	DDX1	LOC100226032	MAP1S	ATP2B2	ACBD4	EXOSC2	BMP6	LOC115495299	BOD1	GSTZ1	INO80D
CPM	LOC115496080	GAL	ADGRA1	ARPC1B	ENDOD1	LOC116808474	LOC116806788	ELAC1	LOC115495583	CHAF1A	LOC115493741	CASD1	IL17C	CRTAC1	LOC116809316	LOC100226723	LOC100229427	KL	HIPK3	LOC115494259	CWF19L2	ATG4C	ACADM	LOC100221933	LOC116806956	LOC100231164	ACTG1	CFAP70	DISC1	LOC100227863	MECR	ATP6V1C1	ACBD6	FAF1	C12H3orf14	LOC115495494	BRMS1L	IFT43	ITGAV
CPNE8	LOC115496129	GCG2	ADGRD2	ARSI	FBXO40	LOC116808479	LOC116806829	EPHB1	LOC115495606	CISD2	LOC115493883	CCN4	KIFC3	CTNNB1	MAPKAPK2	LOC100226810	LOC100229435	LOC100224416	HPS5	LOC115494344	DNAJC2	ATP2A3	ACAP3	LOC100224332	LOC116806959	LOC100231724	ACTR1A	CHST3	DLK2	LOC100229371	NLGN3	ATP6V1D	ACCS	FGF10	C1QTNF5	LOC115495560	BTBD3	ITPKA	KLHL23
CREB3L2	LOC115497384	GCH1	ADORA3	ASAH1	FHL2	LOC116808484	LOC116806899	ESRRG	LOC115495626	CLEC3B	LOC115494293	CDKAL1	KLHDC4	CTXN1	NFKBIZ	LOC100229617	LOC100230753	LOC100227584	IFTAP	LOC115494452	EEA1	ATP5F1E	ACAT1	LOC100224932	LOC116807041	LOC100232391	ACVRL1	CLDN11	ECHDC1	LOC101234190	PLEKHN1	ATXN10	ACE	FNTA	C26H6orf132	LOC115497218	C1H2orf49	JMJD7	KLHL41
CYREN	LOC115498500	GDPD5	ADRA1A	ASPM	FOXM1	LOC116808656	LOC116807250	EXTL2	LOC115497433	COMMD9	LOC115494775	CEP76	LOC100218405	CZH5orf34	PFKFB2	LOC115490631	LOC100232375	LOC100228408	INCENP	LOC115494499	EIF5B	ATP5MD	ACBD5	LOC100232209	LOC116807045	LOC101232904	ADAL	CLDN20	EDARADD	LOC105758791	RPAP2	AZI2	ACER3	FREM1	CAPN9	LOC115497586	CACNA2D1	LGMN	LCT
DBX2	LOC115498503	GJB1	ADRA2A	ATP1B4	FSTL1	NOC4L	LOC116807869	FABP5	LOC116807283	CPT1A	LOC115495912	CHST9	LOC100220796	DAB2IP	PHLDA3	LOC115490688	LOC101233590	LOC100232495	KCNJ11	LOC115497068	ELK4	ATP5MF	ACO2	LOC101233698	LOC116807053	LOC101233936	ADAM19	CLIC4	EFCAB2	LOC105759428	SCAP	BCAP29	ACKR2	FSD1L	CASR	LOC115497655	CALM1	LOC100219136	LOC100190105
DEPDC4	LOC115498507	GJB7	ADRB3	B2M	GFPT1	PPP1R14D	MEGF10	FBXO25	LOC116808499	CREB3L4	LOC115495916	CIBAR1	LOC100220861	DIRAS2	PIGR	LOC115494113	LOC105758648	LOC115490866	KIAA1549L	LOC115497228	FAM126B	ATP5PF	ACOT12	LOC105759105	LOC116807101	LOC105759704	ADAM22	CLMP	ENPP3	LOC105760754	SET	BCL9	ACO1	GFM2	CCN2	MIR23	CAPZA2	LOC100220969	LOC100218944
DMC1	LOC116806616	GLRA1	ADSS1	BAIAP2L1	GLOD5	RIC3	NUDT12	FGF9	LOC116808519	CTDSPL	LOC115496608	CIDEA	LOC100221543	DKK2	PKP1	LOC115495215	LOC115490751	LOC115490886	KIF18A	LOC116808016	FBXW5	ATXN1L	ACOX1	LOC105759169	LOC116807103	LOC105759757	ADAM23	CNKSR3	ERMARD	LOC115490962	SNPH	BCL9L	ACOT11	GJD4	CCN3	P4HA2	CARNMT1	LOC100221708	LOC100219277
DUS4L	LOC116809279	GPR22	AFAP1	BATF3	GNB3	RMDN3	OTOS	FKBP14	LOC116808525	DEK	LOC115496668	CLVS1	LOC100222183	DLG2	PM20D1	LOC115495509	LOC115493358	LOC115491108	KNL1	LOC116808022	FCHO2	AUTS2	ACP5	LOC105760808	LOC116807107	LOC105759916	ADAM28	CNP	EYA4	LOC115491111	SPTB	BCORL1	ACOT8	GOLM1	CD99	PDIA4	CCDC91	LOC100226769	LOC100220375
ELK3	LRGUK	GRIN2C	AFAP1L2	BBS12	GPR12	SLC39A13	PJA2	FOSL2	LOC116808572	DENND10	LOC115497946	CMTM6	LOC100228584	DMD	PTPN7	LOC115495998	LOC115493512	LOC115491164	LGR4	LOC116808023	FEM1A	AVEN	ACSL5	LOC115492346	LOC116807125	LOC115491101	ADAM9	COL27A1	FAM89A	LOC115491278	SRP54	BET1	ACSF3	GRIN3A	CDC42EP1	PDIA6	CCPG1	LOC100229594	LOC100230314
ERP27	LRP2	GTF2H1	AGBL1	BCL2A1	GPR135	SSH3	PLGRKT	FPGT	NUBPL	DHX9	LOC116806778	CNDP2	LOC100230391	DPP6	RAB29	LOC115497040	LOC115493533	LOC115491200	LOC100218771	LOC116808077	FIGN	B3GALT6	ACTG2	LOC115493846	LOC116807366	LOC115491519	ADAMTS8	CREB5	FBXO28	LOC115492401	STX1A	BNC2	ACSS2	IL18BP	CDH11	SDF2L1	CCZ1	LOC100231622	LOC100231025
ETFBKMT	LRRC43	HESX1	AGPAT4	BID	GPR83	TRPM5	RNF180	FRMD5	NUDT14	DNAH9	LOC116807696	CPQ	LOC100230797	EIF5	RAB7B	LOC115497049	LOC115495134	LOC115491889	LOC100223914	LOC116808078	FOXO1	BAMBI	ACTL6A	LOC115494272	LOC116807368	LOC115491662	ADAMTSL5	CRYAB	FBXO5	LOC115492560	STX6	BRPF3	ACTL6B	ISOC1	CEBPD	SPART	CDC123	LOC101233080	LOC101233194
FAM102B	LRRIQ1	HMX2	AGR2	BIN2	GRIK1	TSSC4	TAL2	GCLM	PRORP	DPYSL2	LOC116808084	CRPPA	LOC115492307	ELAPOR2	RGP1	LOC115497063	LOC115495246	LOC115493496	LOC100224825	LOC116808616	FOXP1	BCAS3	ACTR10	LOC115494301	LOC116807372	LOC115491921	ADARB1	CRYBA1	FIG4	LOC115493492	SV2A	BRSK2	ACTN1	JHY	CHRDL1	SRL	CDV3	LOC105759334	LOC101234258
FASTKD5	MDH1B	HMX3	AGTR1	BLK	GRPR	UEVLD	TMEM171	GLUD1	PROX2	DTHD1	LOC116808085	CTHRC1	LOC115492309	ELMOD1	RHEX	LOC115497064	LOC115495305	LOC115493727	LOC100224883	MGME1	FUBP1	BCCIP	ACVR1B	LOC115494302	LOC116807375	LOC115492409	ADCYAP1R1	CTNNA3	FNDC1	LOC115493706	SYVN1	BSN	ACTR5	LETM2	CLCF1		CERK	LOC115493348	LOC105759421
FBXO7	MLPH	HOXA1	AGTRAP	BLNK	GTF2E1		TPM2	GPR78	SLC10A1	DUS1L	LOC116808139	DBF4	LOC115494519	EPC2	SLC16A4	LOC115497065	LOC115496047	LOC115493974	LOC100226232	MSH2	FYCO1	BCDIN3D	ACVR2A	LOC115494311	LOC116807414	LOC115492433	ADD1	CTTNBP2NL	FRK	LOC115494254	WHRN	BTBD1	ADA2	LMNB1	CLDN14		CHP1	LOC115494307	LOC105760283
FGF6	PAWR	HOXA2	AHNAK2	BRD3OS	HGD		TRABD2A	HSD17B12	SLC39A9	DUSP16	LOC116808230	DCAF13	LOC115496711	FAM110C	SLC26A9	LOC115497067	LOC115496118	LOC115494338	LOC100228351	NOL10	GOLGA4	BHLHA15	ADA	LOC115494330	LOC116807432	LOC115492502	ADGRA3	DAAM2	GCFC2	LOC115494530	XPO6	BTF3L4	ADAM15	LMOD3	COL18A1		CLASP2	LOC115495308	LOC115492659
FOXRED2	RFX2	HOXA3	AIDA	BRINP2	HSD3B1			HSD17B4	TDRD9	DUT	LOC116808467	DCDC2	LOC115496752	FAM184A	SLC45A3	LOC115497078	LOC115496367	LOC115494370	LOC100229613	PKIB	GPAT4	BLOC1S2	ADAD1	LOC115494340	LOC116807538	LOC115492532	ADGRF4	DAB1	GEN1	LOC115495570		C15H12orf65	ADAM17	LOC100218989	COL1A2		CLCN3	LOC115495312	LOC115495954
GCAT	RGS22	HOXA4	AIFM3	C1HXorf21	IL17D			IMPA1	TSHR	EEF1A1	LOC116808582	DIPK1C	LOC115496758	FAM184B	SRGAP2	LOC115497098	LOC115496410	LOC115494395	LOC100230866	POLR1B	GRB10	BRCC3	ADAMTS13	LOC115494348	LOC116807579	LOC115492573	ADGRL3	DCBLD1	GINM1	LOC115496012		C1AH12orf29	ADAM8	LOC100220295	COL5A1		CLGN	LOC115495314	LOC115495957
GLIPR1	SFT2D2	HOXA5	AK4	C1QB	ITFG2			INPP5A	UBR7	EEF1B2	LOC116808583	DPEP1	LOC115496773	FBXO33	SYPL2	LOC115497099	LOC115496564	LOC115495484	LOC100231529	RALGAPA2	HMGXB4	BRIX1	ADAMTS19	LOC115494349	LOC116807634	LOC115492814	ADM	DEGS1	GNG4	LOC115496761		C1AH12orf45	ADAMTS12	LOC100220752	COL6A1		CLPTM1L	LOC115495495	LOC115495960
GPR37	SLCO4C1	HOXB2	AKAP10	C1QC	KLF5			ITFG1	WDR89	EEF1D	LOC116808586	DSCC1	LOC115496781	FGD6	SYT6	LOC115497118	LOC115496569	LOC115496266	LOC100231973	RBM34	HNRNPU	BTF3	ADAMTS20	LOC115494411	LOC116807637	LOC115493331	ADNP2	DHX37	GPATCH11	LOC115497886		C4AHXorf56	ADAMTS17	LOC100221782	COL6A2		CNN1	LOC115495514	LOC115495962
GPR85	SMIM35	HOXB3	AKAP5	C1QTNF12	LACC1			KIF7	XRCC3	EFCC1	LOC116808588	E2F5	LOC115496790	FGF13	TMEM183A	LOC115497123	LOC115496656	LOC115496841	LOC100232689	RELL1	KEL	BUD31	ADAMTS6	LOC115494443	LOC116807640	LOC115493665	ADORA2A	DOCK10	GTF3C6	LOC115498193		C5H11orf58	ADAMTS18	LOC100221863	COL8A2		CNOT7	LOC115495519	LOC115495964
GRAP2	SPEF1	HOXD3	AKAP7	C1S	LNX2			KYNU	ZNF770	EIF3E	LOC116809087	ECI2	LOC115496795	FLRT3	TNNI1	LOC115497124	LOC115496760	LOC115497117	LOC105759274	RIN2	KIAA0319L	C13H5orf15	ADAMTSL1	LOC115494465	LOC116807711	LOC115493710	ADPGK	EGFLAM	HASPIN	LOC115498446		CACHD1	ADAMTS5	LOC100226718	CORIN		COQ9	LOC115495530	LOC115495965
GTSE1	SPEF2	HOXD4	AKR1D1	C3	LOC100217615			LOC100217677		EIF3F	NDUFV3	EEPD1	LOC115496796	FRMD3	TSHB	LOC115497143	LOC115496797	LOC115498206	LOC105759305	SLC46A1	LASP1	C17H9orf78	ADAR	LOC115494473	LOC116809030	LOC115493779	ADRB2	EHD4	HHAT	LOC116806615		CACNA1B	ADAT1	LOC100228496	CPED1		CORO1B	LOC115495549	LOC115495967
GXYLT1	TP73	IER3IP1	ALDH18A1	C9H3orf33	LOC100218905			LOC100218025		EMILIN3	PCBP3	EIF3H	LOC115496810	FSTL5	UBL7	LOC115497150	LOC115497343	LOC115498419	LOC105759308	SMIM26	LOC100217945	C1D	ADAT2	LOC115494487	MPZL3	LOC115493927	AFF2	ELOVL1	HS1BP3	LOC116807252		CACNA1C	ADCY6	LOC100228762	CRABP2		CPE	LOC115495580	LOC115495969
HAL		ISL1	ALDOB	CALHM6	LOC100219761			LOC100220381		ENKD1	PDE9A	ELP2	LOC115496829	GAD1	YOD1	LOC116808214	LOC115497615	LOC116806752	LOC105760050	SPTBN1	LOC100220017	C21H1orf50	ADGRL2	LOC115494490	MTHFR	LOC115493982	AFF4	ELOVL7	HSP90AB1	LOC116807455		CACNA1I	ADD2	LOC100229949	CTNNA1		CPLANE2	LOC115495581	LOC115495972
HEBP1		ISL2	ALG8	CARD11	LOC100222639			LOC100224270		EPAS1	PKNOX1	ENKUR	LOC115496853	GCNT4		LOC116808900	LOC115497827	LOC116807519	LOC105760451	THBD	LOC100223646	C5H11orf24	ADIG	LOC115494503		LOC115494410	AFG3L2	ENDOU	ITGB1BP1	LOC116807559		CACNA2D2	ADGRB2	LOC100230026	CUBN		CPLX1	LOC115495584	LOC115495984
HELB		KLHDC7A	ALKAL2	CASP6	LOC100222730			LOC100225980		EPO	POLE2	ENTPD3	LOC115496892	GPHN		LOC116808917	LOC116808416	LOC116808141	LOC115491230	TMPRSS6	LOC100226244	C8H1orf21	ADIPOR1	LOC115494609		LOC115496031	AFMID	ENPP2	IYD	LOC116807670		CACNB4	ADGRF5	LOC100230481	DCN		CRNKL1	LOC115495591	LOC115495985
HMGA2		LBX1	AMER1	CASP7	LOC100223080			LOC100226992		ERAL1	RRNAD1	EPDR1	LOC115496924	GRIP2		LOC116808918	LOC116808462	LOC116808156	LOC115494360	TP53BP2	LOC115493109	C8H1orf52	ADM2	LOC115494619		LOC115496076	AFTPH	ENPP6	KIF25	LOC116807674		CACYBP	ADGRG2	LOC100231439	DDR2		CRYL1	LOC115495596	LOC115495990
IAPP		LDLRAP1	AMHR2	CBR4	LOC100224083			LOC100228354		ERLIN2	SMKR1	ESRP1	LOC116807398	GRM1		LOC116808940	LOC116808537	LOC116808254	LOC115494402	UBE3D	LOC115495037	CACNA1E	ADPRH	LOC115494686		LOC115496172	AGA	EOGT	LOC100190440	LOC116807890		CAPN15	ADGRG3	LOC100231964	DECR1		CSNK1D	LOC115495610	LOC115496004
IFT27		LHX3	ANAPC13	CBX1	LOC100227271			LOC100229524		ETV4	TNFRSF4	EXOC2	LOC116808821	GRM8		LOC116808947	LOC116809241	LOC116808423	LOC115494559	WDR35	LOC115496635	CALM2	ADRM1	LOC115494732		LOC115496212	AGPAT2	ERMN	LOC100223159	LOC116808091		CARS1	ADIPOQ	LOC100232465	DSC1		CSTF1	LOC115495649	LOC115496007
IL2RB		LHX4	ANAPC4	CCDC69	LOC100227480			LOC115492572		EVA1C	TRNAS-GCU_3	FAM210A	LOC116808829	GSG1L		LOC116808948	LYG2	LOC116808457	LOC115495313	ZBTB24	LOC115496918	CCDC27	AFDN	LOC115495092		LOC115496655	AGPAT3	ETNK2	LOC100225542	LOC116808666		CBFA2T2	ADO	LOC101233531	DSG2		CUL2	LOC115495948	LOC115496009
INTS13		LMO1	ANAPC5	CCL17	LOC100228523			LOC115493583		EVC	TRPM8	FAM221A	LOC116808839	HACE1		MEIKIN	MFSD9	LOC116808473	LOC115495344		LOC115498407	CCDC47	AFF1	LOC116806675		LOC115496845	AGPAT5	ETS2	LOC100228466	LOC116809066		CCDC3	ADORA2B	LOC105759661	DSP		CYRIA	LOC116806835	LOC115496017
IQGAP3		LMX1B	ANAPC7	CCNA2	LOC100231773			LOC115494256		EVL	TSN	FAM83A	LONP2	HCN1		MFAP3	MRPL57	LOC116808486	LOC115495350		LOC116807725	CCDC58	AGFG1	LOC116806745		LOC115496851	AGT	EXOG	LOC100232332	LOC116809248		CCDC42	ADPRM	LOC105760829	ECM2		DCAF12	LOC116808482	LOC115496018
ITPR2		LOC100217613	ANGPTL1	CCNL1	LOC100232370			LOC115494337		FAM114A1		FASTKD3	MBTPS1	INPP4B		NME5	MYOZ2	LOC116808652	LOC115495359		LOC116808060	CCDC59	AGK	LOC116808032		LOC115497031	AHCYL1	FA2H	LOC100232533	MEX3A		CD24	ADRA1B	LOC115490934	EFEMP1		DCUN1D4	LOC116808496	LOC115496022
KCNMB4		LOC100217876	ANGPTL7	CCR4	LOC101233542			LOC115494797		FAM237A		FKBP9	MFRP	INSYN2B		NUDCD2	NCAPD2	LOC116809162	LOC115495366		LOC116808225	CCNE2	AGL	LOC116808070		LOC115497073	AIMP1	FAM102A	LOC101233949	NME8		CDC37L1	ADRA1D	LOC115490943	EFNB1		DIO3	LOC116808501	LOC115496060
KDELR3		LOC100218674	ANKEF1	CCR5	LOC105758664			LOC115495084		FAU		FRRS1L	MLKL	IRS1		PARP3	NDFIP2	LRAT	LOC115495368		LOC116809070	CDHR5	AGMAT	LOC116808087		LOC115497283	AK2	FAM126A	LOC105759083	ODF1		CDC42	AFF3	LOC115490963	ENG		DNAJB14	MOK	LOC115496062
KIAA0930		LOC100218751	ANKFN1	CCR7	LOC105758795			LOC115496652		FBXL18		GALR1	MMP2	KCNC2		PCBD2	NEK5	MLANA	LOC115495370		LRRN2	CDK2AP1	AGO2	LOC116808105		LOC115497352	AK6	FAM177A1	LOC105759120	OTOP3		CDC42EP3	AGAP2	LOC115490970	EPYC		DPY19L3	NDUFAF1	LOC115496073
KIN		LOC100218875	ANKRD31	CD14	LOC115490898			LOC115497202		FBXO16		GATAD1	MPHOSPH6	KCND2		PDLIM4	NFKBID	MSTN	LOC115495371		MAF1	CEBPG	AGRN	LOC116808167		LOC116806626	AKAP1	FAM53B	LOC105759122	PKDREJ		CELSR3	AGAP3	LOC115490975	ESM1		DUSP22	NFKBIA	LOC115496089
LAMB4		LOC100221042	ANKRD34C	CD2	LOC115492421			LOC115498205		FBXW11		GDAP1	MTHFSD	KCNF1		PTTG1	PCDH9	NTRK1	LOC115495373		MAN2A2	CENPN	AGTPBP1	LOC116808169		LOC116806629	AKAP11	FGFR2	LOC105759123	PLCZ1		CENPK	AGBL5	LOC115490984	EXT1		E2F6	NOCT	LOC115498271
LGR5		LOC100221841	ANKRD37	CD247	LOC115493823			LOC115498308		FGF20		GDF6	NAT1	KCNIP4		RAD50	PNPLA4	PLEKHG7	LOC115495383		MAPK10	CENPQ	AHCTF1	LOC116808560		LOC116806643	AKAP12	FGL1	LOC115490979	PRRT1B		CEP128	AGGF1	LOC115490988	EYA1		EIF4E2	NPC2	LOC115498287
LIPT1		LOC100222166	ANKRD42	CD274	LOC115493915			LOC116806604		FIGNL1		GEM	NRN1L	KCNJ6		RARS1	POPDC2	RARRES1	LOC115495385		MBNL2	CEP170B	AHCY	LOC116808598		LOC116806809	AKAP6	FITM2	LOC115491150	PRSS55		CETN3	AHDC1	LOC115490991	FAM166A		EIF4EBP3	NRDE2	LOC115498325
LLPH		LOC100222314	ANO10	CD28	LOC115494350			LOC116807020		FOXF1		GFOD1	OGFOD1	KCNK2		RNF14	PROS1	RBM47	LOC115495396		MBNL3	CEP20	AHR	LRP11		LOC116806962	AKIRIN2	FOXN2	LOC115494255	RFX8		CLDN10	AHRR	LOC115491012	FBLN2		ELOC	PAMR1	LOC116807082
LMOD2		LOC100222387	ANO5	CD3E	LOC115494459			LOC116807809		FZD7		GGH	ORC6	KCNS2		SGCD	PUDP	SLC13A1	LOC115495398		MPHOSPH8	CEP44	AJAP1	MATN3		LOC116807051	ALDH6A1	FSCN1	LOC115494263	SMC1B		CLRN3	AIFM1	LOC115491014	FBLN5		ELOVL4	PIGH	LOC116807116
LOC100218635		LOC100223151	ANOS1	CD4	LOC115494647			LOC116807845		GDAP2		GIT2	PKD1L2	KCNT1		SLC22A4	RGCC	SLC13A4	LOC115495399		MTF2	CER1	AK1	MCM9		LOC116807054	ALG14	GAB1	LOC115494283	SPATA18		CMSS1	AIP	LOC115491033	FGL2		ELOVL5	PLA2G4F	LOC116807156
LOC100218691		LOC100223483	ANP32E	CD5	LOC115494841			LOC116808700		GEMIN6		GLIPR2	PLCG2	KDM5B		SLC34A1	SGCG	SLC16A8	LOC115495404		NANP	CFAP36	AK9	ME1		LOC116807076	ALG3	GAB3	LOC115494286	TCFL5		CNEP1R1	AK7	LOC115491036	FHL5		ENTPD7	PLEK2	LOC116808595
LOC100220543		LOC100226250	ANXA13	CD58	LOC115494880			LOC116808854		GFI1B		GMNN	PNP	KIF16B		SLU7	SIGIRR	SLC5A9	LOC115495406		NCL	CHAC2	AKAP9	MMS22L		LOC116807108	ALS2CL	GALNT2	LOC115494288	TEKT3		COPS2	AKAIN1	LOC115491056	FLNB		EPS15	PLEKHD1	LOC116808597
LOC100221944		LOC100226474	ANXA4	CD6	LOC115494903			LOC116808916		GNGT2		GPLD1	POLR2C	KLF10		SPARC	SLC38A3	SLC6A20	LOC115495407		NDRG3	CHURC1	AKNAD1	MOXD1		LOC116807109	AMDHD1	GAN	LOC115494294	TET3		COPS8	AKR7A2	LOC115491069	FOXC1		EPS15L1	PRR5L	LOC116808600
LOC100222013		LOC100227226	ANXA5	CD7	LOC115494932			LOC116809172		GPR27		GSDME	POP4	LDB2		STK32A	SPICE1	SLCO2A1	LOC115495423		NEK6	CIB3	AKR1A1	MTO1		LOC116807110	AMH	GCLC	LOC115494295	TEX36		CPPED1	AKT1	LOC115491072	FOXC2		ESCO1	PSMC1	LOC116808604
LOC100222415		LOC100227351	ANXA6	CD74	LOC115495011			LOC116809310		GPR87		GYS2	PPP1R3E	LIMK2		TERF1	SRPX	SPAG17	LOC115495431		NFIB	CKS2	AKT3	MYOM2		LOC116807130	AMMECR1L	GGACT	LOC115494304	ZPBP2		CPSF4L	ALAD	LOC115491082	FOXD1		ETNK1	PTGR2	LOC116808605
LOC100222446		LOC100230474	AP1M2	CD79B	LOC115495129			LY96		GPRIN3		HACL1	PSKH1	LMX1A		TMIGD1	STS	TF	LOC115495432		NKTR	CLASP1	ALDH2	NFKBIE		LOC116807131	AMOT	GINS2	LOC115494310			CREBBP	ALAS1	LOC115491088	FOXD2		EVI5	RAD51B	LOC116808612
LOC100224417		LOC100231496	AP2B1	CD83	LOC115495255			MDH1		GPT2		HEPACAM2	RBL2	LOC100221315		TXNDC15	TEX30	TLL2	LOC115495435		NPRL2	CLDND1	ALDH7A1	NUP43		LOC116807134	AMOTL1	GK5	LOC115494316			CRTC1	ALB	LOC115491109	FZD4		EWSR1	RPS6KL1	LOC116808631
LOC100224455		LOC100231595	AP3M1	CD8B	LOC115495758			NARS1		GPX7		HSBP1L1	RFWD3	LOC100224218			TFDP1	TMEM72	LOC115495446		NR3C2	CLNS1A	ALG1	OPN3		LOC116807138	AMPD1	GMFB	LOC115494323			CSNK1A1	ALDH3A2	LOC115491110	GALM		EXOC3	SIX4	LOC116808909
LOC100224928		LOC105758513	AP5M1	CDCA3	LOC115495774			NCAPH2		GRM3		IGFBP1	SHCBP1	LOC100229020			TMTC4	TRNAG-GCC_2	LOC115495451		NRG1	CLTA	ALG11	PARP1		LOC116807169	ANAPC1	GNAI1	LOC115494354			CSNK1G2	ALDH4A1	LOC115491113	GATA5		FAM110D	SLC25A21	METTL21A
LOC100225312		LOC105759411	APELA	CDK1	LOC115495827			OPTN		GSK3B		IMPA2	SLC38A8	LOC105758851			UFM1	TRPM3	LOC115495453		NRXN1	CMBL	ALG2	PEX7		LOC116807271	ANAPC15	GNPNAT1	LOC115494359			D2HGDH	ALDH9A1	LOC115491134	GATM		FAM189B	SPINT1	METTL5
LOC100225408		LOC105760884	API5	CDK5RAP3	LOC115496006			PANX2		HDAC8		INVS	SLC7A6OS	LOC105760897			USP12	TTR	LOC115495455		NUCKS1	CNIH4	ALPK1	POLR1C		LOC116807275	ANGEL1	GPR137C	LOC115494373			DAGLA	ALDOC	LOC115491138	GDF7		FAM199X	SYNE3	MTX2
LOC100225970		LOC115490557	APMAP	CENPC	LOC115496198			PCMT1		HOPX		ITGA9	TMEM170A	LOC115491077				TYRP1	LOC115495460		NUFIP2	CNOT11	ALPK3	PRPH2		LOC116807278	ANGPT4	GPR62	LOC115494382			DCAF5	ALG6	LOC115491151	GDPD4		FAM222A	TDP1	MYO1B
LOC100226070		LOC115490731	APOD	CENPE	LOC115496204			PDCD4		HOXD8		KCNG4	TPPP3	LOC115493922				UPP2	LOC115495466		OSBPL6	COL4A3	ALS2	PTK7		LOC116807286	ANGPTL3	GPRC5B	LOC115494393			DCTN4	ALKBH2	LOC115491154	GHR		FANCG	TIPIN	MYO3B
LOC100228825		LOC115490996	APP	CENPU	LOC115496264			PELO		HSPB7		KCTD1	ZDHHC7	LOC115495754				WDR63	LOC115495475		PARP6	COMMD1	ALX3	RARS2		LOC116807395	ANK2	GTPBP2	LOC115494507			DEPDC5	ALKBH3	LOC115491161	GPC1		FAR1	TMEM251	NEMP2
LOC100229115		LOC115491153	AR	CEP55	LOC115496446			PHF19		HUS1		KLHL36		LOC115496043					LOC115495476		PDHB	COMMD2	AMDHD2	RASGRP3		LOC116807417	ANK3	GYG1	LOC115494509			DGKI	ALKBH5	LOC115491171	GPC4		FBXO9	TP53I11	NIF3L1
LOC100229197		LOC115491658	AREG	CEP85	LOC115496551			PIGK		IFNGR2		LACTB2		LOC115496396					LOC115495479		PHF20	COMMD7	AMER2	RIPPLY2		LOC116807418	ANKFY1	HAS2	LOC115494523			DHX30	ALKBH7	LOC115491173	GPX8		FDXR	TRDMT1	ORMDL1
LOC100230811		LOC115492412	ARHGAP10	CFH	LOC115496627			PIP4P2		IFT52		LOC100189937		LOC115496654					LOC115495493		PI4K2A	COX6C	AMMECR1	RMDN2		LOC116807419	ANKH	HERPUD2	LOC115494570			DNMT3A	ALOX5	LOC115491178	GYPC		FNBP4	TTC8	OSGEPL1
LOC100231110		LOC115492999	ARHGAP22	CFLAR	LOC115496828			PLD1		IKZF4		LOC100190123		LOC115497551					LOC115495563		PNN	COX7A2	AMOTL2	RPF2		LOC116807424	ANKHD1	HGF	LOC115494608			DPP9	ALPL	LOC115491236	HHIPL1		FOXL1	TTLL5	PECR
LOC100231669		LOC115493338	ARHGAP24	CH25H	LOC115497607			POLH		IL5RA		LOC100218558		LOC115498332					LOC115495659		PPIG	COX7B	ANAPC16	RWDD2A		LOC116807430	ANKIB1	HIP1	LOC115494706			DR1	ALYREF	LOC115491248	HTRA3		GABRA1	VIPAS39	PLCL1
LOC101234089		LOC115493685	ARHGEF16	CIITA	LOC115497624			PPP3R1		IL7		LOC100219261		LRP4					LOC115495664		PSIP1	CPTP	ANKDD1A	SDCCAG8		LOC116807431	ANKRD13B	HMOX1	LOC115494723			DRD2	AMBP	LOC115491269	ID2		GLIS2	VPS39	PPIL3
LOC105758557		LOC115493832	ARHGEF26	CMPK2	LOC115497795			PRRX2		IRS2		LOC100220322		LRRK1					LOC115495679		PTBP2	CSGALNACT1	ANKRD10	SDHAF4		LOC116807464	ANKRD22	IL12RB1	LOC115494729			DSCAML1	AMD1	LOC115491272	IGF2		GLRA3	ZDHHC13	PPP1R1C
LOC105758573		LOC115493887	ARHGEF39	CMTM3	LOC116807122			PSMD12		ITIH4		LOC100220330		LYZ					LOC115495680		PTPRD	CTIF	ANKRD16	SF3B5		LOC116807465	ANKRD33	INF2	LOC115494733			DSTN	AMER3	LOC115491281	ISLR		GNB1	ZFYVE26	REN
LOC105758584		LOC115493975	ARID5B	CMTM7	LOC116807812			RAB11B		KCNK5		LOC100220507		LZTR1					LOC115495685		QKI	CTXN2	ANKRD17	SLC35D3		LOC116807466	ANKRD34B	INSR	LOC115494734			DSTYK	AMIGO1	LOC115491283	ISM2		GOLPH3		RFTN2
LOC105758588		LOC115494108	ARL11	COG7	LOC116807832			RAB2A		KCNMA1		LOC100220976		MAPK12					LOC115495687		RABGAP1	CUL3	ANKRD26	SLC66A3		LOC116807467	ANKRD50	ITGB8	LOC115494739			DTD1	AMN1	LOC115491379	ITGA8		GOLT1B		RNF25
LOC105758589		LOC115494322	ARL14	CPSF2	LOC116807850			RAB31		KIF26A		LOC100221885		NFE2L1					LOC115495693		RBM25	CYGB	ANKRD27	THADA		LOC116807510	ANKRD54	KANK1	LOC115494744			DTNB	AMT	LOC115491858	ITIH2		GOPC		SGO2
LOC105758592		LOC115494438	ARMC10	CRLF3	LOC116807889			RAVER2		LHPP		LOC100224067		NGEF					LOC115495760		RGS4	CZH5orf63	ANKRD28	TPD52L1		LOC116807514	ANKZF1	KCNN3	LOC115496171			DUSP8	AMZ1	LOC115493678	JAM3		GPM6A		SPATS2L
LOC105759175		LOC115494753	ARMC3	CRTAM	LOC116807936			RCAN3		LOC100219809		LOC100224151		NIPSNAP2					LOC115496777		RHOBTB2	CZH9orf40	ANKRD33B	TXLNB		LOC116807515	ANO6	KCTD4	LOC116806628			DVL1	ANAPC11	LOC115493737	JPT2		GPN2		STAT4
LOC105760490		LOC115495196	ARNT2	CRYM	LOC116808216			RFK		LOC100219858		LOC100226594		NKX2-2					LOC115497201		RNF145	CZIB	ANKRD40	UNC93A		LOC116807526	ANP32A	KIAA0040	LOC116807788			DYNC1LI1	ANAPC2	LOC115494930	KDR		GRINA		STEAP3
LOC115490609		LOC115495363	ARPC5	CSF1R	LOC116808503			RFLNB		LOC100220125		LOC100227844		NLK					LOC115497790		SCN2B	DCBLD2	ANKS1A	VRK2		LOC116807537	ANXA10	KLHL38	LOC116808021			EDC4	ANGPTL4	LOC115495083	KIAA1210		GSE1		STK17B
LOC115490662		LOC115495389	ARSG	CSF2RB	LOC116808576			RTCA		LOC100220197		LOC100228345		NLRX1					LOC115497915		SEPTIN7	DCTN3	ANKS3			LOC116807546	AP1G1	KREMEN1	LOC116808025			EDN2	ANKK1	LOC115495699	KIAA1522		HES4		TG
LOC115490690		LOC115495430	ARSJ	CTLA4	LOC116808603			SEC61A2		LOC100220601		LOC101233268		NPAS2					LOC115498261		SH3PXD2A	DCUN1D5	ANKS6			LOC116807547	AP1S3	LAMC1	LOC116808034			EGR3	ANKLE2	LOC115496182	KLF2		HRH2		TMEM237
LOC115490696		LOC115495433	AS3MT	CTSS	LOC116808706			SH3GL2		LOC100221565		LOC101234087		NR2F2					LOC115498575		SLC38A7	DDX47	ANLN			LOC116807548	AP2A2	LOC100190237	LOC116808058			EHMT1	ANKMY2	LOC115496249	KLF4		IFFO1		TTC30B
LOC115490732		LOC115495627	ASB1	CX3CL1	LOC116808710			SLC1A1		LOC100223058		LOC105758975		NR5A2					LOC116806610		SNX16	DDX6	ANO3			LOC116807555	AP2S1	LOC100221380	LOC116808088			EIF1AX	ANKRD1	LOC115496806	KRT80		IFNGR1		TYW5
LOC115490733		LOC115495712	ASB15	CYTH4	LOC116808896			SMAP1		LOC100223676		LOC105758977		OBI1					LOC116807129		SREK1	DENND1A	ANPEP			LOC116807556	AP3B1	LOC100221970	LOC116808106			EIF2S3	ANKRD13A	LOC115497032	LAMA2		IGF2R		UACA
LOC115490816		LOC115495896	ASB7	CYTIP	LOC116808949			SMIM13		LOC100224002		LOC105758998		OGFOD3					LOC116807389		SRFBP1	DERL2	ANTXR1			LOC116807597	APBA1	LOC100224987	LOC116808149			EIF4G3	ANKRD13D	LOC115497334	LAMB2		IGHMBP2		UBE2E3
LOC115490906		LOC115495898	ASNS	DDRGK1	LOC116809016			SNCG		LOC100224576		LOC105760323		OSBPL9					LOC116807941		SRPK2	DFFA	ANXA11			LOC116807598	APBA2	LOC100227658	LOC116808154			ELL	ANKRD2	LOC116806603	LAMC3		IPO5		VIL1
LOC115490950		LOC115495946	ASPA	DENND2D	ME3			SOD2		LOC100224867		LOC115491655		PAK2					LOC116808458		STK40	DMAC2L	ANXA7			LOC116807602	APBB2	LOC100227890	LOC116808160			ELOA	ANKRD24	LOC116806640	LBHD2		ITGA6		WDHD1
LOC115490983		LOC115496332	ASPG	DIS3L2	MFAP5			SPP2		LOC100225363		LOC115492889		PAK6					LOC116808459		TAF3	DMRT2	AOC1			LOC116807603	APC	LOC100228774	LOC116808161			EPHA4	ANKRD34A	LOC116806696	LCN15		JPH3		WIPF1
LOC115491098		LOC115496341	ATG10	DLG3	MICU2			ST3GAL4		LOC100225584		LOC115493568		PAX3					LOC116808460		TBL1XR1	DNAAF2	AP4E1			LOC116807604	APOA1	LOC101232962	LOC116808172			EPHB2	ANKRD39	LOC116806728	LEPR		KDSR		ZRANB3
LOC115491199		LOC115496834	ATG16L1	DNALI1	MRPL30			STX16		LOC100225666		LOC115493629		PBX3					LOC116808461		TGFB2	DNAJC25	APLNR			LOC116807905	APOB	LOC101232972	MAP1LC3C			EPHB3	ANKRD44	LOC116806739	LHFPL2		KIF5B
LOC115491386		LOC115497131	ATG4B	DNASE1L3	MSL3			SUCLA2		LOC100226112		LOC115493630		PDGFA					LOC116808472		THOC2	DNAJC5	APOA4			LOC116808529	APOBEC2	LOC101233006	MARCKS			ERBB4	ANKRD55	LOC116806741	LOC100217663		KPNA3
LOC115491666		LOC115497181	ATL1	DNASE2B	MTIF3			SUCLG1		LOC100229295		LOC115493642		PEX5L					LOC116808475		TIMM9	DNAJC8	APOH			LOC116808815	APOC3	LOC101233749	MCPH1			ERGIC3	ANKS4B	LOC116806744	LOC100217969		LBR
LOC115492497		LOC115497219	ATP13A4	DNTT	NEK3			TBC1D31		LOC100229304		LOC115493656		PIK3IP1					LOC116808524		TMEM259	DNM3	APOLD1			LOC116808863	APPBP2	LOC101234123	METTL9			EZH1	ANO4	LOC116806746	LOC100218092		LGI1
LOC115493340		LOC115497757	ATP6AP2	DOC2B	NUFIP1			TMEM163		LOC100229641		LOC115493660		PPFIA2					LOC116808688		TMPO	DNMBP	APOO			LOC116808868	APPL1	LOC105758805	MNS1			FAM149B1	ANO9	LOC116806764	LOC100218607		LIPT2
LOC115493344		LOC116806598	ATP6V1H	DOCK2	P2RY2			TRIAP1		LOC100229646		LOC115493683		PPFIBP1					LOC116808944		TNPO1	DOCK7	APRT			LOC116808884	APTX	LOC105759312	MTFR2			FAM3C	ANTKMT	LOC116806765	LOC100219164		LMBRD2
LOC115493349		LOC116806627	ATPSCKMT	DOCK8	P2RY8			UBE2J1		LOC100230192		LOC115493688		PPP2R2D					LRP5		TNPO2	DPF3	AQP1			LOC116808971	AQP3	LOC105759349	MTRF1L			FANCM	ANTXRL	LOC116806766	LOC100219184		LOC100218507
LOC115493361		LOC116806824	AXIN2	DRAM1	PARP11			USP49		LOC100230937		LOC115493704		PPP3CA					LRRC56		TNRC6B	DPM1	ARF6			LOC116809180	AQP4	LOC105760879	MYCT1			FAT1	AOAH	LOC116806768	LOC100220008		LOC100219837
LOC115493367		LOC116806825	B3GNT2	DSG4	PCYT1B			YWHAB		LOC100231369		LOC115493715		PRIMA1					LTO1		TOP1	DUSP12	ARFGAP3			LOC116809185	AQP8	LOC115493557	NT5E			FAT4	AOPEP	LOC116806772	LOC100220024		LOC100220416
LOC115493374		LOC116806852	B3GNT4	DTX3L	PDC			YWHAQ		LOC100231534		LOC115493756		PWWP2A					MSL2		TSPAN3	DUSP4	ARGLU1			NEK4	AQR	LOC115493908	OSTM1			FGFBP1	AP1S1	LOC116806777	LOC100221245		LOC100221697
LOC115493381		LOC116807046	B4GALT1	DUSP11	PDCL3			YWHAZ		LOC101233348		LOC115493760		QDPR					MUC2		TULP4	DYNLT1	ARHGAP18			PITPNA	ARAP2	LOC115493923	PDCD2			FMNL2	AP3B2	LOC116806782	LOC100221256		LOC100222291
LOC115493385		LOC116807390	BACE2	E2F2	PIBF1			ZMPSTE24		LOC105758978		LOC115493766		RBFOX1					MUC5B		UBL3	EARS2	ARHGAP21			PXN	AREL1	LOC115494012	PEX3			FOXK2	AP3S1	LOC116806787	LOC100221772		LOC100225043
LOC115493401		LOC116807590	BAG2	EIF2AK2	PIGA			ZRANB2		LOC105758980		LOC115493768		RBM26					NAT10		UPF2	EBAG9	ARHGAP26			RAB40C	ARF1	LOC115494093	PIGF			FOXO3	AP3S2	LOC116806789	LOC100223101		LOC100231218
LOC115493402		LOC116807839	BAG5	ELF1	POSTN					LOC105759498		LOC115493772		RGS6					NLRP3		URM1	EDF1	ARHGAP30			RALGPS2	ARFGAP2	LOC115494724	PIGM			FOXO6	AP4B1	LOC116806790	LOC100223273		LOC105758771
LOC115493405		LOC116807840	BAIAP2L2	EOMES	PROZ					LOC105760995		LOC115493777		RGS7					NUCB2		VPS4A	EEF1E1	ARHGAP32			RBKS	ARFGEF1	LOC115495505	PLA2G7			FRAS1	AP5Z1	LOC116806793	LOC100224093		LOC105758783
LOC115493411		LOC116808093	BANK1	EPCAM	PRSS23					LOC115490691		LOC115493778		RIPOR2					PARVA		WWTR1	EGR1	ARHGAP36			S100A1	ARFGEF2	LOC115495526	PLAGL1			FYTTD1	APBB1	LOC116806797	LOC100224644		LOC115490759
LOC115493416		LOC116808131	BARD1	EPHA3	PRTFDC1					LOC115490860		LOC115493796		RORA					PDHX		ZBTB20	EIF2B1	ARHGAP42			SERPINB12	ARHGAP1	LOC115495808	POU3F2			GALNT13	APBB3	LOC116806802	LOC100224757		LOC115490997
LOC115493427		LOC116808273	BARHL2	EPSTI1	QTRT2					LOC115491013		LOC115493814		SEMA4G					PIDD1		ZNF710	EIF3A	ARHGDIA			SERPINB5	ARHGAP17	LOC115496311	PPIL4			GALNTL6	APH1A	LOC116806807	LOC100225315		LOC115491124
LOC115493432		LOC116808562	BARX2	ERN2	RCBTB2					LOC115491045		LOC115493837		SERTAD2					PKP3		ZNF740	EIF4A2	ARHGEF33			SFXN2	ARHGAP19	LOC115496397	PPP1R14C			GATAD2B	APLF	LOC116806816	LOC100227468		LOC115492377
LOC115493438		LOC116808972	BBS10	ETS1	REPS2					LOC115491147		LOC115493841		SH3RF3					PLEKHG3			ENTR1	ARHGEF38			SLC16A9	ARHGAP29	LOC115496404	PRIM2			GFAP	AQP10	LOC116806821	LOC100227535		LOC115492722
LOC115493448		LOC116809096	BCAR3	ETV7	RFC3					LOC115491312		LOC115493849		SHISA9					POLD4			ERH	ARHGEF6			SRR	ARHGAP31	LOC115497326	QRSL1			GGCT	AQP5	LOC116806822	LOC100228510		LOC115495864
LOC115493472		LOC116809165	BCL10	EVI2A	RGN					LOC115492115		LOC115493850		SHOX					POLR2L			ERLEC1	ARHGEF7			SUSD5	ARHGAP35	LOC115497360	RD3			GIGYF2	ARCN1	LOC116806840	LOC100228623		LOC115496580
LOC115493475		LOC116809275	BCL11A	EVI2B	RHNO1					LOC115492335		LOC115493874		SHROOM2					RAD51			ETNPPL	ARID1B			TECR	ARHGAP39	LOC115497609	RMND1			GKN2	ARF3	LOC116806848	LOC100230077		LOC115497092
LOC115493476		LRATD2	BCL6	FAM160A1	SERTM1					LOC115492348		LOC115493875		SLC35F3					RCN1			FAAH	ARID2			TRAF3IP1	ARHGAP40	LOC115498013	RNASET2			GLB1	ARFGEF3	LOC116807012	LOC100230348		LOC115497232
LOC115493503		LRRC38	BCO2	FAS	SKA3					LOC115492367		LOC115493878		SLC4A11					RIC8A			FABP7	ARID3A			USE1	ARHGAP5	LOC115498317	RSPH9			GLRX5	ARFIP2	LOC116807019	LOC100230978		LOC115497879
LOC115493509		LZIC	BDKRB2	FBXW7	SLC35F2					LOC115493308		LOC115493881		SLC9A3R2					SCT			FAM151B	ARL1			WDR82	ARHGDIB	LOC115498461	RTN4IP1			GNAT1	ARFRP1	LOC116807077	LOC100231076		LOC116807387
LOC115493513		MCIDAS	BGLAP	FCER1G	SLC9A7					LOC115493477		LOC115493884		SNX17					SERGEF			FAM162A	ARL6IP1				ARHGEF10	LOC116807777	RWDD1			GOLGA2	ARHGAP12	LOC116807221	LOC100231283		LOC116807453
LOC115493514		MIR2994	BHLHA9	FERMT1	SLN					LOC115493643		LOC115493901		SORBS2					SLC25A22			FAM162B	ARMC9				ARHGEF18	LOC116808494	SAMD3			GORAB	ARHGAP23	LOC116807222	LOC101233849		LOC116807943
LOC115493530		MLIP	BHLHE22	FGB	SMAD9					LOC115493686		LOC115493905		SPHKAP					SLC43A3			FAM214B	ARMH3				ARHGEF5	LOC116808643	SF3B6			GPR179	ARHGAP44	LOC116807226	LOC105758686		LOC116808516
LOC115493545		MME	BHLHE40	FGF22	TBC1D4					LOC115493693		LOC115493909		STRIP2					SLC5A12			FARSB	ARNT				ARID3C	LOC116808967	SH3YL1			GRID2IP	ARHGAP6	LOC116807227	LOC105759048		LOC116808803
LOC115494100		MYF5	BHLHE41	FLI1	TCEANC					LOC115493719		LOC115493912		SYT13					SLC7A9			FLII	ARNTL2				ARIH1	LOC116809048	SIRT1			GRIN1	ARHGDIG	LOC116807229	LOC105759945		LOC116808858
LOC115495304		NBN	BIN1	FLNC	TMCO3					LOC115493739		LOC115493920		TIAM1					SMIM38			FOXI1	ARPC2				ARIH2	LOC116809112	SLC17A5			GRK6	ARHGEF10L	LOC116807232	LOC115490627		LOC116808953
LOC115495622		NKX2-1	BIRC5	FLT3	TMEM139					LOC115493763		LOC115493931		TIMP2					SMTNL1			FOXJ2	ARPC3				ARL3	LOC116809159	SMPDL3A			GTPBP10	ARHGEF11	LOC116807234	LOC115490693		LOC116809183
LOC115496220		NKX2-4	BLVRA	FN3K	TOR4A					LOC115493770		LOC115493935		TOX					SOX6			FOXK1	ARPC5L				ARL4A	LOC116809197	SMYD2			HCN4	ARHGEF17	LOC116807237	LOC115490879		LOC116809204
LOC115496878		NKX6-1	BMERB1	FOXS1	TRIM63					LOC115493804		LOC115493939		TRERF1					SPON1			FRMPD1	ARPP21				ARL5A	LPAR1	SNX3			HDAC4	ARHGEF2	LOC116807242	LOC115490949		LOC752003
LOC115497377		NMU	BMI1	FYB1	TRNAI-UAU					LOC115493810		LOC115493947		TRIB2					SWAP70			FTH1	ARR3				ARL8B	LRRC1	SUPT3H			HDGFL3	ARID3B	LOC116807245	LOC115491156		LRRC10B
LOC115497799		NOX4	BMP10	GALNT6	TUBGCP5					LOC115493825		LOC115493948		TRIM32					TMEM79			FUNDC1	ARRDC2				ARRDC1	LTBP1	TAAR1			HEATR6	ARID5A	LOC116807247	LOC115491358		LRRC4
LOC115498534		NPVF	BMPER	GDA	UGGT2					LOC115494023		LOC115493949		TRPC5					TMEM9B			FUNDC2	ARV1				ARTN	MAP4	TBCC			HELZ	ARL16	LOC116807248	LOC115491968		LSM14B
LOC115498587		NR2E1	BNIP2	GEMIN4	UPF3A					LOC115494106		LOC115493952		TSHZ1					TNKS1BP1			FXN	ARVCF				ASAP1	MAPK8IP1	TBXT			HIPK1	ARL4C	LOC116807249	LOC115493139		M6PR
LOC116806607		NTN1	BRAT1	GFI1	VAMP1					LOC115494329		LOC115493967		TTC33					USH1C			G6PC	ARX				ASAP2	MARCHF8	TCTE1			HMGB1	ARMC6	LOC116807256	LOC115493853		MAP11
LOC116806758		OTP	BRD3	GFM1	ZAR1L					LOC115494333		LOC115493969		TTLL11					WEE1			GABARAPL2	ASB10				ASB13	MARK1	TDRD6			HMGN1	ARMC7	LOC116807257	LOC115493860		MAP3K7
LOC116806895		PARD6G	BSPRY	GGA2	ZNF185					LOC115494339		LOC115493985		UTRN					WT1			GAK	ASB11				ASB4	MBP	TDRP			HSPA14	ARPC1A	LOC116807561	LOC115493867		MAP7D1
LOC116807087		PAX2	BTBD6	GLDC	ZRSR2					LOC115494415		LOC115493987		ZFPM2								GALR3	ASB14				ASCC3	MMD	TFB1M			HTR6	ARRDC3	LOC116807671	LOC115494090		MAPK1
LOC116807208		PCYT1A	BTBD8	GLE1						LOC115494449		LOC115493988										GAS2L2	ASB3				ASCL2	MOSPD2	TIAM2			IFT81	ARRDC4	LOC116807928	LOC115494314		MAPT
LOC116807268		PDYN	BTK	GMPPB						LOC115494550		LOC115493994										GET4	ASB6				ASIC5	MRPS18C	TMEM14A			IGFBP4	ARSA	LOC116807930	LOC115494352		MARCHF5
LOC116807684		PHOX2A	C13H5orf47	GPR132						LOC115494822		LOC115493995										GNRH1	ASCC1				ASXL2	MTM1	TNFAIP3			IGSF3	ASAP3	LOC116807931	LOC115495004		MAST3
LOC116807697		PHOX2B	C14H16orf71	GPR143						LOC115494926		LOC115494001										GORASP1	ASF1A				ATAD5	MTUS1	TP53I3			IL17RA	ASB16	LOC116808115	LOC115495212		MBD3
LOC116807699		PITX2	C14H16orf72	GPR146						LOC115494929		LOC115494009										GORASP2	ASIC3				ATE1	MYO18B	TPBG			INPPL1	ASB2	LOC116808168	LOC115495222		MESD
LOC116807723		PITX3	C18H17orf58	GPR160						LOC115495048		LOC115494017										GPR157	ASMT				ATF1	MYO1D	TRAF3IP2			IQCK	ASB8	LOC116808846	LOC115495564		MIB1
LOC116807729		PLEKHS1	C1H11orf54	GPR174						LOC115495080		LOC115494091										GPR180	ASS1				ATF6	MYRF	TTC27			IQSEC3	ASCL1	LOC116809149	LOC115495869		MMEL1
LOC116807736		PPP1R3A	C1H3orf38	GPR18						LOC115495102		LOC115494096										GRIN2B	ATAD1				ATG13	NCAM1	TTK			IRF2	ASH2L	LOX	LOC115497206		MRPL15
LOC116807739		PSCA	C1QL3	GPR34						LOC115495113		LOC115494099										GRPEL1	ATAD2B				ATG14	NDRG1	UFL1			KCNA1	ASIC1	LOXHD1	LOC115497257		NAA35
LOC116807746		PTGFR	C20H20orf85	GPR55						LOC115495141		LOC115495739										GTF2A1L	ATCAY				ATG2B	NFASC	WDR27			KCNA10	ASIC4	MAMDC2	LOC115497277		NCAM2
LOC116807747		QPRT	C21H1orf167	GPR65						LOC115495623		LOC115496463										GTF2A2	ATF7IP				ATG7	NIBAN1	ZC3H12D			KCND3	ASPHD2	MARVELD2	LOC115497617		NCOA7
LOC116807748		RAB9B	C23H1orf109	GPR82						LOC115495657		LOC115496786										GTF2B	ATG12				ATG9A	NINJ2	ZUP1			KCNJ3	ASPN	MBLAC2	LOC115497939		NDRG4
LSMEM1		RASL11A	C25H1orf189	GSDMA						LOC115495816		LOC115498198										GTF2F2	ATG3				ATMIN	NKX6-2				KCNQ2	ASPSCR1	MCC	LOC115498512		NECTIN1
LTA4H		RASSF6	C2CD4C	GZMA						LOC115495931		LOC116806964										HAPLN1	ATOH8				ATOH7	OTOL1				KLF9	ASXL3	MCCC2	LOC116806605		NIPA1
MAP6D1		RET	C4H4orf19	HACD4						LOC115496055		LOC116807664										HDLBP	ATP11B				ATP10B	OTUD7B				KLHL17	ATAD3A	MEF2C	LOC116806973		NISCH
MCM10		RTN4RL1	C4H4orf54	HAUS8						LOC115496122		LOC116807760										HEXB	ATP4A				ATP11C	P2RY13				KMT2D	ATAT1	MIR2954	LOC116807106		NOL4L
MCM5		SERPINE3	C5H15orf62	HELT						LOC115496387		LOC116807768										HIVEP1	ATP5F1A				ATP12A	P3H2				KRR1	ATG101	MIR9-2	LOC116807253		NRCAM
MED21		SIM1	C7H21orf58	HELZ2						LOC115496402		LOC116807770										HMGB3	ATP5F1C				ATP13A1	PCDH20				KSR1	ATG4D	MIRLET7F	LOC116807384		NRF1
METAP2		SKOR1	C7H2orf88	HHEX						LOC115496581		LOC116807785										HMGN5	ATP5ME				ATP13A3	PDLIM2				LAPTM4A	ATG5	MTMR12	LOC116807434		NSUN5
METTL25		SLC10A4	C8A	HLCS						LOC115496917		LOC116807790										HS3ST5	ATP5PB				ATP2A1	PHLDB1				LGR6	ATG9B	MYORG	LOC116807636		NTRK2
MICALL1		SLC17A8	CA10	HSPB3						LOC115496960		LOC116807803										HSPB2	ATP5PD				ATP2A2	PHLPP1				LIN54	ATL2	NANS	LOC116807649		NUP50
MIEF1		SLC18A2	CA12	HSPG2						LOC115496998		LOC116807804										HUNK	ATP6V0A4				ATP2B1	PIK3CB				LINGO3	ATM	NIM1K	LOC116808082		OSBPL11
MTERF2		SLC6A2	CA8	HVCN1						LOC115497011		LOC116807833										ICA1	ATP6V0E1				ATP2B4	PIP4K2A				LINS1	ATP10D	NMRK1	LOC116808276		OVOL1
NAGA		SLC6A4	CABCOCO1	IFI30						LOC115497013		LOC116807838										ICE2	ATP6V1E1				ATP5F1D	PKP4				LMBRD1	ATP11A	NSA2	LOC116808841		OXCT1
NCF4		SLC6A5	CABLES2	IFI35						LOC115497025		LOC116807843										IGF1R	ATP6V1G1				ATP5MPL	PLEKHG4				LOC100189939	ATP13A2	NUDT2	LOC116809036		OXR1
NDUFA12		SPX	CABP1	IFI6						LOC115497037		LOC116807849										IGSF5	ATP6V1G3				ATP6V0A1	PLLP				LOC100190084	ATP2C1	NXNL2	LOC116809130		PACSIN1
NDUFB2		STK39	CABP7	IFNG						LOC115497274		LOC116807851										IHO1	ATP7B				ATP6V0A2	PLP1				LOC100217943	ATP4B	OSTF1	LOC116809194		PAIP1
NFAM1		STKLD1	CACNA2D4	IFT80						LOC115497405		LOC116807857										IL1RAP	ATR				ATP6V0C	PLS3				LOC100219675	ATP5F1B	PARD3B	LPAR4		PAN2
NFYB		SYNJ2	CACNG4	IKBKE						LOC115497439		LOC116807871										IMMP1L	ATXN2				ATP6V1A	PNPLA2				LOC100221705	ATP5IF1	PCGF3	LPL		PAPSS2
NOL12		TASP1	CACNG5	IKZF1						LOC115497569		LOC116807872										INIP	ATXN7				ATP6V1B1	PPFIBP2				LOC100223254	ATP5MC1	PDE6B	LTBP2		PATL1
NTF3		TFAP2D	CADPS2	IKZF3						LOC115497598		LOC116807886										INO80C	ATXN7L1				ATP7A	PPP1R16B				LOC100227764	ATP5MC3	PDE8B	LTK		PCBP2
NUP37		TH	CALB1	IL10RA						LOC115497819		LOC116807891										INTS14	AURKAIP1				ATP8A1	PPP2R3B				LOC100228308	ATP5MG	PGM5	LUM		PCGF5
OTOGL		TLX3	CALB2	IL15						LOC115497902		LOC116807893										IP6K2	AVPR1A				ATP8A2	PRAG1				LOC100228642	ATP5PO	PIGG	MDK		PDK1
PAH		TPH2	CALCB	IL18RAP						LOC115497921		LOC116807895										IQGAP2	B3GLCT				ATP8B2	PRKRIP1				LOC100229500	ATP6AP1L	PLAA	MEOX2		PDK3
PARVG		TRIM55	CALCR	IL1R2						LOC115497936		LOC116807900										IRAK4	BACH1				ATP9A	PTPN3				LOC100231857	ATP6V0B	PPEF2	MEP1B		PDZD8
PDE6H		TUBB6	CAMK1D	IL1RL1						LOC115498246		LOC116807901										ISCA1	BAG4				ATRN	PTPRE				LOC100232385	ATP6V1B2	PPIC	MFSD2B		PGRMC1
PDXP		USP1	CAMK1G	IL21R						LOC115498310		LOC116807942										ISCA2	BASP1				ATRNL1	PXMP4				LOC100232386	ATP6V1F	PRKAA1	MRC2		PHAX
PHETA2		UTS2	CAMK2D	IL2RG						LOC115498338		LOC116808414										ITM2A	BAZ1B				ATXN1	RAB26				LOC105758954	ATP8B3	PTBP3	MSX2		PHF6
PHLDA1		VSX2	CAMKK2	IL4R						LOC115498366		LRRCC1										ITM2B	BAZ2B				AZIN1	RALGDS				LOC105759097	ATPAF1	PTGER4	MXRA5		PIFO
PHYH		WNT4	CAMKV	IL7R						LOC115498374		LYPLA1										KARS1	BBS5				B3GALNT1	RAP2C				LOC105760185	ATPAF2	RCL1	MXRA8		PLRG1
PICK1			CAP2	INPP5D						LOC115498555		MAK										KCNQ5	BCAS1				B3GALNT2	REEP3				LOC105760330	ATRAID	SDK1	MYO1C		PNPLA8
PLA2G6			CAPN5	INPP5K						LOC116806634		MARCHF11										KDF1	BCL2L10				B3GALT2	RFC2				LOC105760702	ATRIP	SELENOP	NIBAN2		PPARGC1A
PMCH			CAPN8	INSC						LOC116806660		MATN2										KIAA0556	BCL2L11				B3GAT1	RHOB				LOC105760834	ATXN3	SLC14A1	NID2		PPP1CB
POLR3B			CAPRIN2	INTS10						LOC116806749		MC4R										KIAA1671	BCLAF1				B4GALT5	RHOU				LOC115490574	ATXN7L2	SLC38A9	NSUN3		PPP1CC
POLR3H			CARNS1	IQCD						LOC116806754		MCM4										KIF24	BCOR				B4GALT6	RILPL1				LOC115490986	ATXN7L3	SLC49A3	OCSTAMP		PPP1R2
PPHLN1			CAV1	IRAG2						LOC116807004		MCMDC2										KLHL10	BCR				BABAM2	RNH1				LOC115491295	AUP1	SPAG8	OGN		PPP1R21
PRDM4			CAV2	IRF1						LOC116807006		MEAK7										KPNA7	BDH2				BACH2	RNPEPL1				LOC115491297	AVL9	SPINK4	OLFML2A		PPP2R5E
PTX4			CAVIN2	IRF4						LOC116807009		MED10										L3MBTL2	BDP1				BAG1	RRBP1				LOC115491595	AVPI1	ST8SIA4	OLFML3		PPRC1
PUS7			CBLN1	IRF7						LOC116807042		MED30										LACTB	BECN1				BAHD1	S1PR3				LOC115491724	AXIN1	TDRD7	OSR1		PRKCA
PVALB			CBLN2	IRF8						LOC116807104		METTL4										LARP1	BEST3				BAK1	SCCPDH				LOC115491734	AZIN2	TMC1	PAPLN		PRMT7
PYROXD1			CBLN4	ITGA11						LOC116807137		MIOS										LARP4B	BFSP1				BBS4	SCD				LOC115491946	B3GNT5	TMOD1	PDCD2L		PRPF3
RASD2			CBY2	ITGA4						LOC116807287		MPP6										LAS1L	BHLHE23				BBS7	SEC14L5				LOC115492448	B3GNT7	TRIM14	PDGFC		PRPF39
RECQL			CC2D2A	ITGB2						LOC116807385		MPPE1										LCMT1	BICDL1				BBS9	SEPTIN5				LOC115492886	B3GNTL1	UBASH3B	PDGFRB		PRUNE2
REP15			CCDC126	ITK						LOC116807505		MRPL13										LCOR	BICRAL				BCL2L13	SEPTIN8				LOC115492903	B4GALT3	UNG	PDPN		PSEN2
RIC8B			CCDC134	ITPRIP						LOC116807574		MRPL3										LIMD2	BIN3				BCL2L14	SLAIN1				LOC115493170	B4GALT4	VDAC3	PERP		PURB
RINT1			CCDC148	JAML						LOC116807704		MRS2										LIN28B	BIRC6				BEAN1	SLC16A1				LOC115493532	B4GALT7	WDR36	PHLDB2		RAB33B
RXYLT1			CCDC174	JCHAIN						LOC116807854		MSMO1										LIPH	BLCAP				BEND3	SLC16A10				LOC115493634	B9D1	WDR41	PI15		RAB3C
SAMM50			CCDC178	JDP2						LOC116807949		MSRB2										LITAF	BLOC1S6				BEND4	SLC22A7				LOC115493671	BABAM1		PKP2		RAB3GAP2
SEPTIN3			CCDC181	KATNB1						LOC116808035		MTBP										LOC100190436	BNIP3				BEND5	SLC25A29				LOC115493679	BACE1		PLEKHH2		RAB5A
SERHL2			CCDC28A	KCNA2						LOC116808056		MTERF3										LOC100190483	BOK				BEND6	SLC44A5				LOC115493851	BAHCC1		PLN		RAB5B
SLC25A3			CCDC51	KDM1A						LOC116808064		MTRR										LOC100190503	BOLL				BEND7	SLC45A2				LOC115494432	BANP		PMP22		RAB9A
SLC25A51			CCDC82	KLF13						LOC116808210		MYLIP										LOC100218477	BPIFB2				BICD1	SLC49A4				LOC115494837	BARHL1		PNPLA7		RABL6
SLC37A3			CCDC92	KLHL6						LOC116808219		MYMK										LOC100218829	BPTF				BIRC2	SLC6A9				LOC115495670	BAZ1A		PRDM6		RAD1
SMIM30			CCK	KLRG1						LOC116808235		MYO3A										LOC100220010	BRCA1				BIRC7	SMIM8				LOC115495781	BAZ2A		PRELP		RAD23B
SNU13			CCKBR	KPNA2						LOC116808267		MYOM1										LOC100220484	BRD1				BMP1	SMURF1				LOC115495873	BBIP1		PRIMPOL		RALA
SOCS2			CCNB2	LAG3						LOC116808438		NCALD										LOC100220799	BRF1				BMP2K	SOX10				LOC115495950	BCAN		PRRX1		RANBP1
SPAM1			CCNE1	LAPTM5						LOC116808468		NEK11										LOC100221249	BRICD5				BMP4	SOX8				LOC115496648	BCAR1		PTGER2		RASSF9
SREBF2			CCNO	LCK						LOC116808480		NFATC1										LOC100221679	BRINP1				BMP5	SPECC1				LOC115496932	BCHE		RAB11FIP1		RB1CC1
SSTR3			CD164	LCP1						LOC116808623		NKIRAS1										LOC100221838	BRK1				BMP7	SPPL2A				LOC115497269	BCKDK		RASD1		RCCD1
ST13			CD36	LCP2						LOC116808833		NPHP3										LOC100221905	BRWD1				BMPR1A	ST18				LOC115497284	BCL2L1		RBP5		RELCH
STAB2			CD38	LETMD1						LOC116808860		NPSR1										LOC100222004	BRWD3				BMPR1B	STX2				LOC115497307	BCL7A		RBPMS2		RHBDF2
STK38L			CDC7	LIF						LOC116808873		NSMAF										LOC100222099	BSG				BNIP3L	SUCLG2				LOC115497625	BCL7B		RILPL2		RNF113A2
SULT4A1			CDCA7	LIME1						LOC116808881		NUDCD1										LOC100222111	BTBD11				BPGM	SYN2				LOC115497739	BET1L		RPA1		RNF141
SUOX			CDH20	LIPI						LOC116808893		OSR2										LOC100222254	BTC				BPIFC	SYNPO2				LOC115497891	BFAR		SCIN		RNF170
SYCE3			CDH5	LMOD1						LOC116808946		OTUD6B										LOC100223021	BUB1B				BRAP	TBC1D2				LOC115497908	BFSP2		SERPIND1		RO60
SYCP3			CDHR1	LOC100217562						LOC116808962		OTULINL										LOC100223567	BZW1				BRCA2	TESK2				LOC115497955	BICC1		SERPINF1		ROBO4
TAB1			CDHR2	LOC100217691						LOC116809000		OXSM										LOC100224019	BZW2				BRI3BP	TGFB3				LOC115498017	BICD2		SERPINH1		RSKR
TBXAS1			CDK20	LOC100217693						LOC116809028		PDE7A										LOC100224559	C10H15orf40				BRIP1	TJP2				LOC115498022	BIVM		SFN		SAR1B
TCP11L2			CDKN1A	LOC100217705						LOC116809032		PKIA										LOC100224645	C10H15orf48				BROX	TMEM125				LOC115498249	BLM		SFRP1		SCAMP1
TEF			CDKN1B	LOC100217789						LOC116809076		PLEKHF2										LOC100225817	C10H15orf61				BSND	TMEM52				LOC116806625	BLOC1S3		SGMS2		SEC31A
THAP5			CDKN2AIP	LOC100217895						LOC116809125		POLR2K										LOC100226358	C11H16orf70				BTBD2	TMEM63A				LOC116807055	BLZF1		SIDT1		SEC61A1
TMBIM4			CDR2	LOC100218402						LOC116809313		PPDPFL										LOC100226437	C14H16orf91				BTBD7	TMEM87A				LOC116807115	BMF		SIGLEC15		SEMA6D
TMEM117			CDS1	LOC100218628						LOC751995		PPP1R3G										LOC100227822	C14H7orf50				BTBD9	TPM3				LOC116807171	BMP15		SIX1		SF3A1
TMEM19			CDX2	LOC100218724						LRRC14B		PPP1R42										LOC100229180	C15H12orf43				BTG1	TSPAN2				LOC116807179	BMS1		SIX2		SHB
TOM1			CEMIP	LOC100219422						LRRC72		PRELID3A										LOC100229366	C15H12orf49				BTRC	TXNDC16				LOC116807439	BNC1		SLC13A3		SLC16A3
TOMM22			CENPV	LOC100219865						MAEA		RAD54B										LOC100229546	C17H9orf16				BUB1	TXNL4B				LOC116807449	BOLA1		SLC16A12		SLC1A3
TPRKB			CEP112	LOC100220042						MAP1A		RALBP1										LOC100229729	C18H17orf67				BUB3	UBE2Q2				LOC116807531	BOLA3		SLC19A1		SLC30A9
TRABD			CEP63	LOC100220118						MAVS		RAMP3										LOC100230290	C18H17orf80				BYSL	UGT8				LOC116807681	BOP1		SLC22A2		SLC35E3
TRIM24			CEP85L	LOC100220412						MC2R		RANBP9										LOC100230295	C1AH12orf50				C12H3orf18	VMP1				LOC116807860	BORA		SLC26A1		SLC8B1
TSPO			CFAP161	LOC100220453						MEGF11		RAPGEF5										LOC100230461	C1H11orf97				C1GALT1C1	WNK1				LOC116807887	BORCS6		SLC26A5		SMARCD2
TTC26			CFAP20DC	LOC100220534						MIR101-2		RBIS										LOC100230612	C1H21orf91				C1H11orf87	XG				LOC116808419	BORCS7		SLC26A7		SMIM14
TTLL1			CFAP300	LOC100220779						MKNK1		RHPN1										LOC100231060	C1QTNF1				C1QL2	ZDHHC14				LOC116808639	BORCS8		SLC2A10		SNX2
TTLL12			CFAP53	LOC100221052						MN1		RIOK3										LOC100231213	C21H1orf159				C1QTNF7	ZDHHC20				LOC116808673	BRF2		SLC2A9		SNX30
TWF1			CFAP58	LOC100221316						MRPL19		RNF138										LOC100232500	C22H2orf68				C1QTNF8	ZYX				LOC116808816	BRI3		SLC38A4		SOCS6
VT1			CFAP99	LOC100221351						MTMR9		RNF182										LOC101232979	C24H11orf52				C20H20orf204					LOC116809006	BRPF1		SLC39A8		SP1
VWF			CHCHD4	LOC100221952						MTTP		RPA3										LOC101233540	C26H1orf162				C26H1orf116					LOC116809114	BRS3		SLC5A5		SPAG9
WASL			CHCHD7	LOC100221999						MYDGF		RRM2B										LOC101233900	C26H1orf74				C26H6orf89					LOC116809250	BSCL2		SMOC2		SPRED1
WDR64			CHD7	LOC100222323						NAAA		RSPO2										LOC101233957	C2CD3				C28H19orf44					LOC116809306	BSDC1		SMYD4		SPTLC1
WEE2			CHERP	LOC100222365						NACA		SCGN										LOC101234054	C2H5orf49				C2CD2L					LRP1	BTAF1		SNX22		SRA1
WNT2			CHGB	LOC100222416						NACC2		SDCBP										LOC101234197	C2H8orf76				C2H1orf35					LRRC47	BTBD10		SOS2		SRSF7
XPNPEP3			CHIC1	LOC100222441						NCOR2		SDR16C5										LOC105758732	C2H8orf88				C2H6orf62					LRTM2	BTBD17		ST6GAL1		ST14
YARS2			CHKA	LOC100222610						NDUFB8		SEH1L										LOC105758863	C3H2orf50				C2H8orf34					LSAMP	BTBD19		STAU2		STAT3
YEATS4			CHL1	LOC100222691						NECAP1		SLC12A7										LOC105759311	C3H6orf120				C4H4orf46					LUZP1	BTG4		STOM		STAT6
ZCRB1			CHMP2B	LOC100222957						NECTIN4		SLC22A23										LOC105760244	C4AH8orf48				C5H11orf49					LYAR	BUD13		STRA6		STK11
ZNF277			CHODL	LOC100222960						NIPAL1		SLC35B3										LOC105760508	C4H20orf27				C5H11orf96					LYRM1	BUD23		SYNPO		STK26
			CHRDL2	LOC100223132						NOA1		SLC66A2										LOC115490753	C4H4orf50				C5H14orf39					LYRM7	C13H5orf24		TBX15		STRN
			CHRM4	LOC100223160						NOVA1		SLC6A19										LOC115490855	C5H11orf16				C6H10orf143					MAP2K4	C15H22orf39		TBX18		STX17
			CHRM5	LOC100223311						NOX5		SNTB1										LOC115490903	C7H2orf66				C6H10orf71					MAP3K13	C17H9orf116		TCF7L1		SUGP1
			CHRNA4	LOC100223333						NPAS3		SPAG1										LOC115490904	C7H2orf76				C6H10orf88					MAPRE1	C18H17orf75		TGM2		TBC1D14
			CHRNA6	LOC100223369						NR0B1		SRD5A1										LOC115490945	C8B				C6H10orf95					MBD5	C1AH12orf40		THBS4		TBC1D22A
			CHRNA9	LOC100223480						NTRK3		SRI										LOC115491008	C8G				C8H1orf146					MCTS1	C1GALT1		TIMP3		THOC5
			CHRNB4	LOC100223649						NUDT6		STEAP1										LOC115491029	CACNA1D				C8H1orf210					MCUR1	C1H12orf57		TMEM106C		TLN1
			CHST13	LOC100223994						NUP42		STK3										LOC115491142	CACNA1G				C9H17orf50					MED12	C1QL1		TMEM114		TM9SF3
			CHST7	LOC100224009						OBSL1		SUGCT										LOC115491231	CACNA2D3				C9H2orf72					MED13L	C1QTNF4		TMEM263		TMED7
			CHST8	LOC100224709						PAGR1		SULF1										LOC115491257	CACNG1				C9H3orf70					MEF2D	C21H1orf174		TMEM37		TMEM106B
			CISD1	LOC100224870						PALLD		SYBU										LOC115491911	CACUL1				C9orf72					MGAT5B	C22H2orf42		TMPRSS9		TMEM132E
			CISH	LOC100224927						PAX9		SYCP2L										LOC115492373	CADM1				CA6					MIER2	C23H1orf216		TNC		TMEM164
			CKB	LOC100225149						PCARE		TBC1D7										LOC115492406	CALCRL				CAB39L					MILR1	C25H1orf43		TNFAIP2		TMEM170B
			CKMT2	LOC100225270						PCDH7		TCF24										LOC115492509	CALHM2				CACFD1					MTMR3	C27H17orf113		TNFAIP8		TMEM175
			CLDN1	LOC100225635						PCP4		TDP2										LOC115492514	CALML4				CACNB1					MXD1	C28H19orf25		TRNAC-GCA_1		TMEM30A
			CLDN18	LOC100225774						PECAM1		TERT										LOC115492562	CALN1				CACNB2					MYO9A	C3H1orf115		TSKU		TMEM33
			CLDN5	LOC100225830						PERM1		TGM4										LOC115492667	CALR				CALD1					MZT1	C4H20orf194		UNC5B		TMEM39B
			CLEC16A	LOC100226157						PEX11A		TGS1										LOC115493033	CAMK2A				CALU					NAA50	C5H14orf132		USP10		TMEM41B
			CLIC5	LOC100226165						PLCB2		THOC1										LOC115493121	CAPN7				CAMKK1					NAP1L4	C6		VASN		TMF1
			CLN8	LOC100226208						PLEKHA8		TMC2										LOC115493347	CAPS2				CAMP					NCOA2	C7		VILL		TMX3
			CLSTN3	LOC100226213						POC1A		TMED6										LOC115493355	CAPZA1				CAMSAP1					NCOR1	C9		VIM		TRAPPC2L
			CLYBL	LOC100226241						POGLUT1		TMEM42										LOC115493495	CARD10				CAMSAP2					NCS1	CA7		WDR86		TRIM54
			CMC4	LOC100226582						POLD1		TMEM65										LOC115493508	CARD19				CAND1					NDUFAF2	CACNA1S		WNT6		TSPAN13
			CMPK1	LOC100226645						POMK		TMEM67										LOC115493644	CARF				CAPNS2					NEO1	CACNB3		WTIP		TSPAN14
			CNGA3	LOC100226902						POPDC3		TMEM70										LOC115493680	CARMIL1				CAPRIN1					NMUR1	CACNG3		XDH		TTI2
			CNIH3	LOC100227341						PPA2		TMEM74										LOC115493762	CARS2				CARHSP1					NOC2L	CACTIN		YAP1		UBAP2
			CNN3	LOC100227477						PPL		TPD52										LOC115493902	CASC1				CASS4					NOTCH2	CAD		ZBTB46		UBAP2L
			CNOT2	LOC100227488						PPP1R3B		TRAPPC9										LOC115493918	CASK				CASTOR2					NPM1	CADM2		ZNF217		UBE2K
			CNOT8	LOC100227529						PRMT9		TRHR										LOC115493979	CASP2				CBL					NRP2	CALHM3				UBE2W
			CNPY1	LOC100228079						PRPF18		TRIP13										LOC115494021	CASP8AP2				CBX6					NSMCE1	CAMK1				UBE3A
			CNRIP1	LOC100228097						PRR36		TRNAL-CAG_2										LOC115494085	CASP9				CBX7					NT5C3A	CAMK2B				UBE3C
			CNTD1	LOC100228653						PRRG1		TRPA1										LOC115494127	CASZ1				CBX8					NUDT13	CAMK2N2				UBL5
			CNTF	LOC100228705						PTGR1		TWSG1										LOC115494260	CATIP				CC2D1B					NUMA1	CANT1				UBXN2B
			CNTFR	LOC100228858						RFC1		TXNL4A										LOC115494327	CAVIN1				CCDC125					NUMB	CANX				UCHL3
			CNTN6	LOC100229245						RHBG		UMAD1										LOC115494488	CBLL1				CCDC127					NUP133	CAP1				UGCG
			CNTNAP5	LOC100229375						RNFT2		UTP23										LOC115494492	CCAR1				CCDC14					NUP98	CAPN10				UNC45A
			COCH	LOC100229421						RP1L1		VAPA										LOC115494493	CCDC146				CCDC158					OCIAD1	CAPZB				USP3
			COL22A1	LOC100229516						RPL10A		VDR										LOC115494501	CCDC171				CCDC167					ORM2	CARD9				VAC14
			COL25A1	LOC100229609						RPL11		VPS13B										LOC115494540	CCDC18				CCDC25					OSBP2	CARM1				WDR11
			COL5A2	LOC100229789						RPL13		VPS41										LOC115494722	CCDC183				CCDC30					PACRGL	CARMIL2				WNK4
			COL6A3	LOC100229802						RPL13A		VPS4B										LOC115494860	CCDC186				CCDC40					PALM	CASC3				XPOT
			COL7A1	LOC100229988						RPL14		WDR60										LOC115494879	CCDC43				CCDC6					PCDH1	CASKIN1				YME1L1
			COLCA2	LOC100230194						RPL15		WIPF3										LOC115494928	CCDC65				CCDC61					PCDH15	CASQ2				ZBED4
			COLEC12	LOC100230285						RPL18A		WNT7A										LOC115494957	CCDC66				CCDC84					PDCD10	CAST				ZBTB48
			COPS3	LOC100230452						RPL21		WRNIP1										LOC115494972	CCDC71				CCDC93					PDE4DIP	CASTOR1				ZBTB7A
			CORO1C	LOC100230680						RPL22		YES1										LOC115494976	CCDC85A				CCL20					PITPNM1	CAVIN4				ZFAND5
			CORO6	LOC100231144						RPL23A		ZBTB10										LOC115495022	CCDC88A				CCM2L					PLAGL2	CBARP				ZNF384
			CPAMD8	LOC100231469						RPL24		ZFAND1										LOC115495047	CCL19				CCN1					PLEKHA6	CBLB				ZNF451
			CPB2	LOC100231510						RPL26L1		ZHX1										LOC115495063	CCL28				CCNB3					PLXND1	CBX2				ZNF639
			CPEB1	LOC100231564						RPL27		ZHX2										LOC115495115	CCNDBP1				CCND2					PMM1	CBX3				ZNF703
			CPLX3	LOC100231797						RPL27A		ZMYND11										LOC115495277	CCNI				CCNY					POLR2A	CBX4
			CPNE2	LOC100232025						RPL29												LOC115495492	CCNL2				CCNYL1					POLRMT	CBX5
			CPNE4	LOC100232117						RPL3												LOC115495500	CCNT2				CCP110					POMP	CC2D1A
			CPO	LOC100232284						RPL30												LOC115495533	CCR10				CCSER1					POU4F1	CCBE1
			CPS1	LOC100232395						RPL31												LOC115495597	CCSAP				CCT5					PPFIA4	CCDC103
			CPXM2	LOC100232623						RPL32												LOC115495749	CCT3				CD101					PPID	CCDC115
			CRABP1	LOC100232747						RPL34												LOC115495821	CCT4				CD2AP					PPM1B	CCDC117
			CRB1	LOC101232842						RPL35												LOC115495851	CCT8				CD82					PPP1R12B	CCDC12
			CRB2	LOC101232863						RPL35A												LOC115495943	CD109				CD86					PPWD1	CCDC122
			CREB3L1	LOC101232986						RPL36												LOC115496120	CD180				CD99L2					PRDM11	CCDC124
			CREM	LOC101233009						RPL36A												LOC115496153	CD320				CDC27					PRDX1	CCDC137
			CRHBP	LOC101233140						RPL37												LOC115496234	CD34				CDC42BPA					PRKAG2	CCDC141
			CRHR2	LOC101233188						RPL3L												LOC115496273	CD40				CDC73					PRKCB	CCDC142
			CRIP1	LOC101233303						RPL4												LOC115496377	CD40LG				CDCP1					PROM2	CCDC149
			CRISP2	LOC101233381						RPL5												LOC115496409	CD59				CDCP2					PRPF8	CCDC15
			CRISPLD1	LOC101233409						RPL7												LOC115496426	CD81				CDH13					PRPSAP2	CCDC187
			CRY1	LOC101233449						RPL7A												LOC115496571	CD9				CDH2					PRR12	CCDC191
			CSF3R	LOC101233451						RPL7L1												LOC115496624	CDA				CDH22					PSMA2	CCDC198
			CSPG4	LOC101233494						RPL8												LOC115496669	CDAN1				CDH4					PSMA6	CCDC50
			CSPP1	LOC101233514						RPL9												LOC115496724	CDC14B				CDH8					PSMD14	CCDC57
			CSRNP1	LOC101233554						RPLP0												LOC115496820	CDC20B				CDK14					PTCD2	CCDC62
			CSRP3	LOC101233626						RPLP1												LOC115496860	CDC25A				CDK15					PTCH2	CCDC73
			CTCF	LOC101233669						RPLP2												LOC115496962	CDC34				CDK17					PTPA	CCDC77
			CTDP1	LOC101233700						RPS11												LOC115496974	CDC40				CDK19					PTPRF	CCDC78
			CTDSPL2	LOC101233730						RPS12												LOC115497246	CDC45				CDK3					PTPRS	CCDC80
			CTNNA2	LOC101233739						RPS13												LOC115497254	CDC5L				CDKL2					PUM3	CCDC88C
			CTNND1	LOC101233771						RPS14												LOC115497309	CDCA7L				CDKN1C					PWP1	CCDC9B
			CTNS	LOC101233989						RPS15A												LOC115497321	CDCA8				CDKN3					RAB11FIP3	CCM2
			CTPS2	LOC101234056						RPS16												LOC115497675	CDH15				CDS2					RAB18	CCN5
			CTXND1	LOC101234091						RPS17												LOC115497695	CDH23				CDYL2					RAB21	CCNF
			CUTA	LOC101234096						RPS2												LOC115497741	CDH9				CEBPB					RAI1	CCNG2
			CXCL14	LOC101234182						RPS20												LOC115497750	CDK13				CEL					RASGRF1	CCNH
			CYP19A1	LOC101234199						RPS23												LOC115497791	CDK18				CELF5					RASL10B	CCNJ
			CYRIB	LOC101234202						RPS24												LOC115497839	CDK2				CEND1					RBBP8NL	CCNK
			CYTL1	LOC105758756						RPS25												LOC115497920	CDK5RAP2				CENPX					RBMS3	CCNT1
			DACH1	LOC105758767						RPS26												LOC115497927	CDK6				CEP19					RCN2	CCR9
			DACH2	LOC105758806						RPS27A												LOC115498114	CDKL1				CEP68					RERE	CCSER2
			DACT1	LOC105758876						RPS3												LOC115498190	CDKL5				CERS1					RGS2	CCT7
			DACT2	LOC105758892						RPS3A												LOC115498248	CDKN2C				CERS5					RGS7BP	CD164L2
			DAGLB	LOC105759033						RPS4X												LOC115498373	CDT1				CERS6					RHEB	CD47
			DAP	LOC105759143						RPS6												LOC116806631	CELSR2				CERT1					RHOA	CD84
			DAPL1	LOC105759153						RPS7												LOC116806781	CEMIP2				CFAP221					RHOH	CDC14A
			DARS2	LOC105759190						RPS8												LOC116806834	CENPP				CFAP410					RIF1	CDC26
			DBX1	LOC105759381						RPSA												LOC116807175	CENPS				CFAP77					RIMS3	CDC42BPB
			DCAF17	LOC105759399						SAP30L												LOC116807206	CEP152				CFAP97					RIMS4	CDC42EP4
			DCAF6	LOC105759491						SBSPON												LOC116807281	CEP164				CGAS					RMI2	CDC42SE1
			DCLRE1C	LOC105759518						SCFD2												LOC116807282	CEP170				CGGBP1					RNF123	CDC6
			DCP1A	LOC105759805						SDAD1												LOC116807288	CEP192				CGREF1					RNF157	CDCA2
			DCP1B	LOC105759932						SENP2												LOC116807374	CEP250				CHAF1B					RNF7	CDH12
			DCTD	LOC105760310						SH3BP5												LOC116807377	CEP290				CHAT					RNFT1	CDH17
			DDX42	LOC105760522						SIKE1												LOC116807380	CEP295				CHD5					ROGDI	CDIP1
			DEAF1	LOC105760649						SKI												LOC116807483	CEP350				CHGA					RPH3A	CDK10
			DERA	LOC115490562						SLC1A4												LOC116807655	CEP43				CHM					RPRD2	CDK12
			DEUP1	LOC115490588						SLC25A27												LOC116807673	CEP57				CHMP7					RRAS2	CDK2AP2
			DFFB	LOC115490720						SLC26A2												LOC116807675	CEP57L1				CHORDC1					RSBN1	CDK5
			DHCR24	LOC115490725						SLC2A1												LOC116807695	CEP78				CHRAC1					RUSC2	CDK5R1
			DHRS11	LOC115490810						SLC30A8												LOC116807740	CEP89				CHRNA5					RWDD4	CDK5R2
			DHTKD1	LOC115490877						SLC39A1												LOC116807745	CEP97				CHRNG					SBF1	CDK5RAP1
			DISP2	LOC115490889						SLC9A3												LOC116807796	CERS4				CHST10					SCARF1	CDK9
			DKC1	LOC115491032						SLIT2												LOC116807816	CES2				CHST11					SCN8A	CDON
			DLAT	LOC115491047						SMARCAL1												LOC116807883	CETN2				CHST2					SCRT2	CDYL
			DLG1	LOC115491052						SMPDL3B												LOC116808050	CFAP100				CHSY1					SEC62	CELF6
			DLGAP1	LOC115491083						SNRNP25												LOC116808097	CFAP298				CHTOP					SEC63	CENPF
			DLK1	LOC115491094						SNRNP35												LOC116808107	CFAP43				CIAO2A					SERF1A	CENPI
			DMRT1	LOC115491103						SNRPF												LOC116808119	CFAP54				CILK1					SESTD1	CENPL
			DNAAF3	LOC115491115						SNX8												LOC116808147	CFAP61				CIP2A					SETD1B	CENPT
			DNAAF5	LOC115491116						SPO11												LOC116808173	CFAP65				CITED4					SETD2	CEP104
			DNAH12	LOC115491120						SS18L1												LOC116808182	CFAP69				CIZ1					SH2B2	CEP131
			DNAI1	LOC115491181						SYT2												LOC116808450	CFAP73				CKAP5					SH3GL3	CEP41
			DNAI2	LOC115491204						SYT8												LOC116808535	CFDP1				CKS1B					SIN3A	CEP83
			DNAJC12	LOC115491205						TAFA1												LOC116808573	CGRRF1				CLBA1					SKP1	CEP95
			DNMT3B	LOC115491394						TANGO2												LOC116808617	CHAMP1				CLCC1					SLC12A5	CEPT1
			DOCK11	LOC115491505						TBC1D19												LOC116808699	CHCHD1				CLCN4					SLC12A9	CERCAM
			DOK4	LOC115492013						TCTE3												LOC116808776	CHCHD10				CLCN6					SLC8A1	CERS3
			DOK6	LOC115492234						TECRL												LOC116808785	CHCHD2				CLEC19A					SLITRK3	CFAP20
			DOLK	LOC115492259						TFAM												LOC116808787	CHCHD3				CLIP2					SMAGP	CFAP57
			DPAGT1	LOC115492340						TMEM192												LOC116808826	CHCHD6				CLIP4					SMARCA4	CFAP74
			DPY19L1	LOC115492347						TMEM41A												LOC116808849	CHD2				CLMN					SMARCA5	CFI
			DPYD	LOC115492508						TNS1												LOC116808875	CHD4				CLPS					SMG6	CGNL1
			DPYSL3	LOC115492664						TOP1MT												LOC116808886	CHD6				CLPX					SMG7	CHADL
			DPYSL4	LOC115492670						TPT1												LOC116808902	CHD9				CLRN2					SNRNP200	CHD1L
			DRAXIN	LOC115492673						TRAFD1												LOC116808904	CHEK1				CLSTN1					SNX24	CHD3
			DRC3	LOC115492675						TRIM29												LOC116808974	CHMP1B				CLSTN2					SNX5	CHDH
			DRD1	LOC115493017						TTC29												LOC116808976	CHMP4B				CLTC					SNX6	CHEK2
			DRD5	LOC115493031						UBA52												LOC116809064	CHMP4C				CLTCL1					SORL1	CHFR
			DTNBP1	LOC115493097						UBE2T												LOC116809107	CHMP5				CLUH					SPATA1	CHKB
			DTWD1	LOC115493225						UBTD2												LOC116809190	CHPF2				CMIP					SPATA2	CHMP1A
			DUSP1	LOC115493242						UBXN11												LOC116809196	CHST12				CMTM8					SPEG	CHMP2A
			DUSP10	LOC115493243						URGCP												LOC116809210	CHST14				CMTR1					SPEN	CHMP6
			DUSP14	LOC115493244						URI1												LOC116809218	CHST15				CNBP					SPG11	CHPF
			DUSP28	LOC115493246						UTP18												LOC116809229	CHST4				CNGA1					SPOCK1	CHRM3
			DUSP5	LOC115493263						VPS37B												LOC116809232	CHSY3				CNGB3					SQOR	CHRNA1
			DUSP6	LOC115493267						WFS1												LOC116809327	CHUK				CNMD					SRC	CHRNA10
			DYDC1	LOC115493268						ZMAT2												LRRC30	CIAPIN1				CNN2					SREK1IP1	CHRNA2
			DYNLT3	LOC115493272																		LRRC3B	CIB1				CNNM4					SRRM1	CHRNB2
			DYRK4	LOC115493286																		LRTM1	CIB2				CNOT10					SSB	CHST1
			EBF1	LOC115493342																		LSM11	CIRBP				CNOT9					STK35	CHTF18
			EBF3	LOC115493368																		LSM3	CIT				CNPY3					STX12	CHTF8
			ECD	LOC115493419																		LSM5	CITED2				CNR1					STXBP1	CIAO1
			ECE2	LOC115493447																		LSM8	CLCN1				CNST					STXBP5L	CIAO2B
			EDA2R	LOC115493463																		LUC7L	CLIC3				CNTN1					SUGT1	CIAO3
			EDN3	LOC115493497																		LYRM4	CLK4				CNTN5					SUPT5H	CIART
			EDNRB	LOC115493722																		LYSMD2	CLNK				CNTNAP2					SUPT6H	CIC
			EFHC1	LOC115493736																		LZTS1	CLOCK				COBL					SYAP1	CILP2
			EFHC2	LOC115493753																		MACC1	CLPB				COG3					SYNCRIP	CISD3
			EFHD1	LOC115493820																		MAD2L1BP	CLUAP1				COG6					SZT2	CKAP2L
			EFNA2	LOC115493839																		MAGOH	CLVS2				COL13A1					TAF6	CKAP4
			EFNA5	LOC115493899																		MAIP1	CMC1				COL17A1					TAGLN3	CLCNKA
			EHHADH	LOC115493928																		MAN2C1	CMKLR1				COL1A1					TBC1D15	CLDN12
			EIF3B	LOC115493930																		MANBA	CNIH1				COL26A1					TBPL1	CLDN25
			EIF4EBP2	LOC115493950																		MAP2K6	CNKSR1				COL3A1					TCF3	CLINT1
			EIF5A2	LOC115494016																		MAPK1IP1L	CNKSR2				COL4A5					TCP1	CLIP1
			EIF6	LOC115494136																		MARVELD3	CNNM2				COL4A6					TFIP11	CLK2
			ELAVL4	LOC115494142																		MAST2	CNOT1				COL8A1					THAP1	CLK3
			ELOVL6	LOC115494249																		MAT2B	CNOT6				COL9A2					THG1L	CLN6
			EMB	LOC115494264																		MC1R	CNOT6L				COL9A3					THRA	CLP1
			EMX2	LOC115494289																		MDC1	CNTN2				COLQ					TIGAR	CLPP
			EN1	LOC115494313																		MED31	CNTN3				COMMD3					TLE3	CLSPN
			EN2	LOC115494363																		MED9	CNTNAP4				COPRS					TMEM131	CLTB
			ENDOV	LOC115494388																		MEGF6	CNTRL				CORO2B					TMEM132C	CLU
			ENO2	LOC115494390																		MEMO1	COL11A1				COX19					TMEM159	CLUL1
			ENO4	LOC115494484																		MGLL	COL12A1				COX6A1					TMEM18	CMC2
			ENTPD1	LOC115494645																		MICOS10	COL16A1				CPD					TMEM63C	CMYA5
			EPC1	LOC115494699																		MIF4GD	COL19A1				CPSF1					TMEM94	CNNM1
			EPHB6	LOC115494810																		MIR142	COL20A1				CPSF3					TMSB4X	CNPPD1
			EPHX4	LOC115494861																		MIR7644	COL21A1				CPT2					TNRC18	CNPY2
			EPS8	LOC115494876																		MIRLET7C-2	COL24A1				CPZ					TNRC6C	CNTLN
			ERC2	LOC115494878																		MIS18BP1	COL2A1				CRAT					TOGARAM1	COASY
			ERG	LOC115494895																		MLH1	COMMD4				CRBN					TOM1L2	COBLL1
			ERICH3	LOC115494907																		MLYCD	COMMD8				CREB1					TPM1	COG1
			ESR2	LOC115494946																		MMGT1	COMT				CREBL2					TPR	COG4
			ESRP2	LOC115494978																		MND1	COMTD1				CREG1					TRAF2	COG8
			ETFDH	LOC115494986																		MOSPD1	COP1				CREG2					TRARG1	COIL
			ETV1	LOC115494992																		MPC1	COPG1				CRH					TRMT11	COL14A1
			ETV3	LOC115494995																		MPRIP	COPS4				CRLF2					TSHZ2	COL15A1
			EVA1B	LOC115495075																		MRPL14	COPS7B				CRMP1					TXNDC12	COL23A1
			EVPL	LOC115495146																		MRPL18	COPS9				CRYBB3					TXNDC9	COL28A1
			EXOC1L	LOC115495221																		MRPL21	COPZ1				CRYGN					UBA3	COL4A1
			EXOC3L1	LOC115495351																		MRPL23	COQ10B				CRYGS					UBE2D1	COL4A2
			EXOSC3	LOC115495436																		MRPL32	COQ2				CSAD					UBE2D2	COLEC10
			EZH2	LOC115495442																		MRPL35	COQ4				CSF1					UBE2D3	COLGALT1
			F3	LOC115495485																		MRPL39	CORO2A				CSGALNACT2					UBE2F	COLGALT2
			FABP1	LOC115495515																		MRPL53	CP				CSNK2A1					UBE2V2	COMP
			FABP3	LOC115495559																		MRPS15	CPLANE1				CSRNP3					UBTF	COPA
			FAHD1	LOC115495615																		MRPS17	CPN1				CSTF3					UNC13A	COPB1
			FAM133B	LOC115495722																		MRPS25	CPSF4				CTBP1					UPF1	COPB2
			FAM167A	LOC115495731																		MRPS27	CPSF6				CTBP2					UPF3B	COPE
			FAM174B	LOC115495892																		MRPS28	CRACD				CTH					USP16	COPG2
			FAM20A	LOC115495894																		MRPS36	CRADD				CTNNAL1					VBP1	COPS5
			FAM222B	LOC115495935																		MTF1	CRAMP1				CTPS1					VDAC2	COPS7A
			FAM234A	LOC115495949																		MTMR4	CRCP				CTSC					VPS26A	COQ10A
			FAM240A	LOC115496272																		MTR	CREB3L3				CTSE					VWCE	COX7C
			FAM53A	LOC115496342																		MTRES1	CREBZF				CTSH					WNK2	CPEB3
			FAM83G	LOC115496345																		MUC3A	CRIM1				CUL5					WNT9B	CPLX2
			FAN1	LOC115496483																		MXI1	CRKL				CUX1					XIAP	CPNE7
			FAT2	LOC115496534																		MYBL1	CRLF1				CUZD1					XYLT2	CPNE9
			FAT3	LOC115496644																		MYCBPAP	CRLS1				CWC25					YIPF4	CPOX
			FBLN1	LOC115496763																		MYH10	CROCC				CWH43					YPEL5	CPSF7
			FBRSL1	LOC115496802																		MYO1E	CRTAP				CXADR					ZBTB39	CPT1B
			FBXL14	LOC115496826																		MYZAP	CRY2				CXXC5					ZBTB47	CRACR2B
			FBXL21P	LOC115496888																		N6AMT1	CRYBA2				CYFIP2					ZC3H15	CRELD1
			FBXL7	LOC115496956																		NADSYN1	CRYBA4				CYLD					ZC3H6	CRIP2
			FBXO2	LOC115497026																		NAE1	CRYBG3				CYSRT1					ZNF335	CRISPLD2
			FBXO22	LOC115497057																		NASP	CSDE1				CYSTM1					ZNF341	CRK
			FCHSD1	LOC115497110																		NAV1	CSE1L				CZH18orf25					ZNF462	CROT
			FDFT1	LOC115497243																		NDUFA4	CSMD1				DAP3					ZNF469	CRTC2
			FER1L6	LOC115497281																		NDUFA5	CSMD2				DAPP1					ZNF598	CRYBB1
			FEZF2	LOC115497339																		NDUFA6	CSMD3				DAXX					ZNF609	CRYBG2
			FFAR4	LOC115497425																		NDUFAF4	CSRP2				DAZAP1					ZNF706	CRYZL1
			FGA	LOC115497431																		NDUFAF5	CSTB				DAZAP2					ZNRF2	CS
			FGD4	LOC115497447																		NDUFAF6	CTBS				DBI					ZSWIM8	CSDC2
			FGF1	LOC115497448																		NDUFB1	CTC1				DBNL						CSK
			FGF16	LOC115497571																		NDUFB10	CTDSP1				DBR1						CSNK1E
			FGF8	LOC115497572																		NDUFS3	CTNNBIP1				DBT						CSNK2A2
			FHL1	LOC115497621																		NDUFS4	CTNNBL1				DCAF10						CSPG5
			FHL3	LOC115497649																		NELFA	CTR9				DCAF15						CST7
			FHOD1	LOC115497653																		NEPRO	CTSA				DCAKD						CSTF2
			FILIP1	LOC115497657																		NEURL1B	CTSL				DCLK1						CTCFL
			FLOT1	LOC115497720																		NF1	CTSZ				DCP2						CTNND2
			FLT4	LOC115497760																		NFAT5	CTTN				DCUN1D1						CTRL
			FLVCR2	LOC115497767																		NINJ1	CTTNBP2				DDX20						CTSB
			FN1	LOC115497828																		NIT2	CUL9				DDX27						CTSK
			FNDC10	LOC115497877																		NKAPD1	CUNH19orf57				DDX46						CTSO
			FNDC3B	LOC115497917																		NME7	CUX2				DDX49						CTU2
			FNDC5	LOC115497924																		NOP16	CWC15				DDX52						CUEDC1
			FNDC9	LOC115497930																		NOTCH1	CXCR4				DDX59						CUEDC2
			FNTM1	LOC115498096																		NRTN	CXXC4				DEF6						CUL4B
			FOXB1	LOC115498168																		NSMCE4A	CYCS				DELE1						CUNH6orf136
			FOXF2	LOC115498297																		NUBP1	CYP2AC7				DENND11						CUTC
			FOXG1	LOC115498316																		NUS1	CYP2J19A				DENND4A						CWC27
			FOXN1	LOC115498377																		OAZ1	CYP2W1				DERL1						CWF19L1
			FOXN3	LOC115498493																		OLA1	CYS1				DERL3						CXCL12
			FRMD7	LOC115498496																		OPCML	CYTH3				DES						CXCR5
			FRRS1	LOC115498566																		OSTC	CZH9orf85				DESI1						CXXC1
			FSBP	LOC115498595																		OSTN	D1DR				DESI2						CYBASC3
			FST	LOC116806606																		OXTR	DAAM1				DET1						CYHR1
			FSTL4	LOC116806621																		PAIP2	DAG1				DEXI						CYP2J40
			FUT10	LOC116806697																		PARL	DAO				DGAT2						CYSLTR1
			FUT4	LOC116806700																		PAX1	DAPK1				DGCR2						CYSLTR2
			FZD1	LOC116806842																		PBK	DAPK2				DGCR8						CYTH1
			FZD10	LOC116806851																		PBRM1	DAPK3				DGKB						CZH18orf32
			FZD8	LOC116806871																		PCNP	DAW1				DGKE						DAB2
			G6PC2	LOC116806948																		PDAP1	DAZL				DGLUCY						DAD1
			GAB2	LOC116807032																		PDCD6	DBNDD2				DGUOK						DALRD3
			GABARAPL1	LOC116807037																		PDE12	DCAF1				DHDH						DBF4B
			GABBR2	LOC116807062																		PER2	DCAF7				DHH						DBN1
			GABPB1	LOC116807066																		PFDN1	DCHS1				DHRS7C						DBNDD1
			GABRA5	LOC116807069																		PHB2	DCK				DHX15						DCAF8
			GABRD	LOC116807081																		PIGY	DCLK2				DHX33						DCLK3
			GABRG1	LOC116807083																		PINX1	DCLRE1B				DHX35						DCLRE1A
			GABRG3	LOC116807085																		PITPNB	DCSTAMP				DICER1						DCPS
			GAD2	LOC116807092																		PLA2G4E	DCT				DIP2A						DCST2
			GALNT11	LOC116807121																		PMEL	DCTN2				DIPK2B						DCTN1
			GALNT12	LOC116807209																		POLR1E	DCTN5				DKK3						DCX
			GALNT14	LOC116807214																		POLR2F	DCTN6				DLC1						DDAH1
			GALNT17	LOC116807230																		POU2F1	DDA1				DLL1						DDB1
			GALNT18	LOC116807407																		PPIB	DDI2				DMAP1						DDHD1
			GALNT7	LOC116807473																		PPIE	DDIAS				DMBT1						DDHD2
			GALNT9	LOC116807474																		PPP1R10	DDN				DMBX1						DDIT4
			GALR2	LOC116807563																		PPP1R15B	DDT				DMTN						DDOST
			GAP43	LOC116807706																		PPP2CA	DDX11				DMXL2						DDX23
			GAS7	LOC116807715																		PPP2CB	DDX17				DNAAF4						DDX25
			GASK1A	LOC116807820																		PPP2R3C	DDX31				DNAH17						DDX28
			GATA2	LOC116807826																		PPP2R5A	DDX3X				DNAH8						DDX41
			GATA3	LOC116807842																		PRKG1	DDX5				DNAJB5						DDX43
			GATB	LOC116807870																		PRKX	DDX51				DNAJC11						DDX54
			GBGT1	LOC116807945																		PRR35	DENND1B				DNAJC15						DDX56
			GBX2	LOC116808030																		PRRC2B	DENND2A				DNAJC16						DDX58
			GC	LOC116808039																		PRRC2C	DENND2C				DNAJC18						DECR2
			GCGR	LOC116808053																		PSD3	DENND4C				DNAJC19						DEDD
			GCK	LOC116808184																		PSMA3	DENND5B				DNAJC3						DEF8
			GCNA	LOC116808185																		PSMA4	DENND6A				DNAJC6						DENND3
			GCNT3	LOC116808228																		PSMA7	DENR				DNAJC7						DENND4B
			GDF2	LOC116808237																		PSMB2	DEPDC1				DNAL1						DENND6B
			GEMIN5	LOC116808238																		PSMB7	DEPDC7				DNER						DGKK
			GFER	LOC116808424																		RAB12	DEPTOR				DNM1						DHCR7
			GFOD2	LOC116808490																		RAB37	DGCR6L				DNM1L						DHODH
			GFRA1	LOC116808526																		RAD9B	DGKD				DOCK1						DHRS13
			GFRA3	LOC116808608																		RAE1	DGKH				DOCK3						DHRS7B
			GFRAL	LOC116808661																		RAMAC	DHDDS				DOCK9						DHX16
			GGA1	LOC116808705																		RAP1A	DHRS3				DOK5						DHX32
			GGT1	LOC116808714																		RAPH1	DHRS7				DOK7						DHX40
			GHITM	LOC116808729																		RASGRF2	DHRSX				DOP1A						DIAPH2
			GHRH	LOC116808819																		RBM18	DHX29				DPH5						DIO2
			GHRHR	LOC116808887																		RBM19	DHX57				DPH7						DIPK1A
			GHSR	LOC116808924																		RBM33	DHX58				DPM3						DIPK1B
			GID8	LOC116808933																		RBM8A	DHX8				DPP8						DIRAS1
			GJA1	LOC116808982																		RBX1	DIABLO				DPY19L4						DIS3L
			GJB2	LOC116808987																		RER1	DIDO1				DRD4						DIXDC1
			GLIS1	LOC116809013																		REXO2	DIO1				DRG1						DKK1
			GLOD4	LOC116809018																		RHOT1	DIP2B				DRP2						DLD
			GMEB1	LOC116809031																		RIT1	DIP2C				DTNA						DLGAP3
			GMNC	LOC116809052																		RNASEH1	DIPK2A				DUS2						DLGAP4
			GNAS	LOC116809068																		RNF13	DIRAS3				DUSP3						DLGAP5
			GNB1L	LOC116809102																		RNF146	DIS3				DYM						DLL4
			GNG2	LOC116809122																		RNF186	DISP1				DYNC1H1						DLX4
			GOLGA5	LOC116809123																		RNF207	DISP3				DYNC1I1						DMAC1
			GOT2	LOC116809124																		RNF43	DLG5				DYSF						DMRTB1
			GPA33	LOC116809227																		ROMO1	DLGAP2				E2F1						DMWD
			GPALPP1	LOC116809290																		RPL22L1	DLST				ECHDC3						DNAH10
			GPD1	LOC116809291																		RPL37A	DLX1				ECSCR						DNAH3
			GPD1L	LOC116809309																		RPL39	DLX2				EDAR						DNAH5
			GPER1	LPAR5																		RPN1	DLX5				EDEM1						DNAJA3
			GPI	LPAR6																		RPP30	DLX6				EDEM3						DNAJB1
			GPNMB	LPXN																		RPS21	DMGDH				EDIL3						DNAJB2
			GPR119	LRP3																		RPTOR	DMTF1				EDNRA						DNAJB4
			GPR142	LRRC34																		RRN3	DMXL1				EED						DNAJC17
			GPR156	LSP1																		RSRC2	DNAAF1				EEF2K						DNAJC28
			GPR20	LWS																		RTF2	DNAH11				EFCAB1						DNAJC5G
			GPR21	LYN																		RUBCN	DNAJB11				EFCAB14						DNAJC9
			GPR52	LYVE1																		RUVBL1	DNAJB12				EFCAB7						DND1
			GPR6	MAN2B2																		RYK	DNAJB6				EFNB2						DNM2
			GPR68	MAP3K8																		SAMD13	DNAJC1				EFR3A						DNPEP
			GPSM2	MAPK15																		SAP18	DNAJC13				EFTUD2						DNTTIP1
			GRAMD2A	MATK																		SAP30BP	DNAJC21				EGF						DNTTIP2
			GRAP	MCOLN2																		SCD5	DNAJC30				EGFL7						DOHH
			GRB14	MED6																		SCP2	DNAL4				EGLN3						DONSON
			GRB2	MELK																		SCRN3	DNLZ				EIF1						DPH1
			GREB1L	MFNG																		SDHAF3	DOCK5				EIF1B						DPH2
			GREM1	MFSD1																		SEC31B	DOK2				EIF2A						DPH3
			GRHL1	MFSD10																		SEC61G	DOLPP1				EIF2B5						DPYS
			GRIN3B	MINAR2																		SELENOK	DOP1B				EIF2S2						DPYSL5
			GRIP1	MIR30C																		SELENOT	DOT1L				EIF3D						DQX1
			GRM2	MKI67																		SEPTIN6	DPCD				EIF3J						DRAP1
			GRM7	MLF1																		SETD5	DPM2				EIF4G2						DST
			GSG1	MMRN2																		SH3GLB1	DPP7				EIF4H						DTX2
			GSTCD	MOV10																		SHMT1	DPT				ELMO1						DTX4
			GTF2H3	MPEG1																		SKA2	DRD3				ELMOD2						DTYMK
			GTF2IRD1	MRPL45																		SLC16A6	DRG2				ELOVL2						DUPD1
			GTF3C4	MTG2																		SLC22A15	DROSHA				ELP1						DUS3L
			GTF3C5	MTHFD1L																		SLC25A12	DSCAM				ELP3						DUSP26
			GUCA1B	MUC4																		SLC25A47	DSEL				EME1						DUSP27
			GUCA1C	MYO1F																		SLC30A4	DTWD2				EMILIN2						DUSP7
			GUCY1A1	MZB1																		SLC7A13	DUSP15				EML1						DVL3
			GUCY1A2	N4BP2L1																		SLIT1	DYNC2H1				EMP2						DYNC1I2
			GUCY2F	NAALADL2																		SMAD5	DYNC2LI1				ENOX2						DYNC1LI2
			HABP2	NELFCD																		SMIM20	DYNLRB1				ENPP1						DYRK2
			HACD3	NKX1-2																		SMTN	DYRK1A				ENPP5						E2F4
			HCN3	NLRC3																		SNAP25	DYTN				ENTPD8						EAF2
			HDX	NLRC5																		SNAPC3	DZIP1				EPB41L1						ECE1
			HEY1	NME9																		SNRNP48	E2F3				EPB41L4B						ECEL1
			HEY2	NMI																		SNRPB2	E2F7				EPB42						ECI1
			HHIP	NOP14																		SNRPD1	E4F1				EPG5						ECPAS
			HIC2	NPHS2																		SNRPD3	EAF1				EPHA1						ECSIT
			HIVEP2	NUB1																		SNRPG	EBF2				EPHA5						EDC3
			HJURP	NUF2																		SOGA1	EBI3				EPN2						EEF1A2
			HLF	OCIAD2																		SORCS2	EBNA1BP2				EPOP						EEF1AKMT1
			HMGCR	OLFML1																		SOX5	ECHDC2				EPPK1						EEF1AKMT2
			HMGCS1	OMD																		SPATA20	ECHS1				ERBIN						EEF1AKMT4
			HMGCS2	OSMR																		SPG21	ECM1				ERC1						EEF1AKNMT
			HNRNPLL	P2RX1																		SRP19	EDA				ERCC3						EEF1G
			HOMER2	P2RY12																		SS18L2	EDN1				ERCC6L						EEF2
			HOXA7	P2RY14																		SSBP1	EDRF1				ERCC8						EEF2KMT
			HOXB9	P2RY6																		SSH1	EEF1AKMT3				ERICH1						EEFSEC
			HOXD9	PALMD																		SSU72	EFHD2				ERLIN1						EFCAB10
			HPCAL1	PANK3																		ST6GALNAC2	EFL1				ERMP1						EFHB
			HPCAL4	PARP10																		STARD3NL	EFNA1				ESAM						EFNA3
			HPD	PARP9																		STARD5	EGFL6				ESPNL						EFNA4
			HPDL	PATL2																		STRAP	EGFR				ESRRB						EGR4
			HPSE	PDCD1																		SUDS3	EGR2				ESS2						EHBP1
			HRH3	PDCD1LG2																		SUMO1	EHD3				ETF1						EHF
			HS3ST1	PDGFRL																		SUMO2	EIF2B2				ETFA						EI24
			HS3ST2	PDLIM3																		SYNJ1	EIF2B3				ETV6						EIF2AK1
			HS3ST4	PDZD7																		SYNRG	EIF2S1				EVA1A						EIF2AK3
			HS6ST2	PEAK3																		TAF12	EIF3L				EVX1						EIF2B4
			HS6ST3	PEPD																		TAF13	EIF3M				EVX2						EIF3G
			HSD11B2	PI4K2B																		TAOK1	EIF4ENIF1				EXD2						EIF3I
			HSPA9	PIK3AP1																		TATDN1	EIPR1				EXD3						EIF4A3
			HSPB1	PKD2																		TBC1D22B	ELAVL1				EXO1						EIF4B
			HSPB8	PKDCC																		TBCA	ELAVL2				EXOC3L2						EIF4E3
			HTR1B	PKN3																		TCEA1	ELFN2				EXOC4						EIF4EBP1
			HTR1D	PLBD1																		TCTEX1D1	ELMO2				EXOC5						ELAC2
			HTR1E	PLD4																		TCTN3	EMC2				EXOC8						ELF2
			HTR1F	PLEK																		TEC	EMC7				EXOSC8						ELFN1
			HTR2C	PLK1																		TERF2	EMC8				EXOSC9						ELMOD3
			HTR4	PLSCR1																		TET1	EMG1				EXT2						ELOF1
			HTR5A	PODN																		TEX261	EML5				EXTL3						ELP4
			HTR7	POFUT2																		TFB2M	EML6				EYA2						ELP6
			IBSP	POLG																		THOC7	EMP1				EYA3						EMC1
			IDI1	POLR3E																		TIMM17A	EMSY				EYS						EMC10
			IFRD1	POU2AF1																		TIMM44	ENAH				EZR						EMC4
			IGF2BP3	PPARD																		TJP1	ENC1				F2RL2						EMC6
			IHH	PRCC																		TK1	ENDOG				F8						EMCN
			IKBIP	PRDM1																		TLX2	ENO1				F9						EMID1
			IL11RA	PRKCQ																		TM2D1	ENPP4				FADS1						EMILIN1
			IL17B	PSD																		TM2D3	ENPP7				FADS2						EML4
			IL17REL	PSTPIP2																		TM9SF2	ENY2				FADS6						ENGASE
			IL22RA1	PTAFR																		TMA16	EP300				FAF2						ENHO
			IL23A	PTPN22																		TMED2	EP400				FAM107B						ENOPH1
			ILDR1	PTPN6																		TMEFF1	EPB41				FAM110B						ENPEP
			ILDR2	PTPRC																		TMEFF2	EPB41L2				FAM124B						ENTPD4
			ILKAP	PTPRCAP																		TMEM165	EPB41L3				FAM135B						EPHA7
			ING3	RAB44																		TMEM167A	EPB41L4A				FAM13A						EPN3
			ING5	RAC2																		TMEM167B	EPB41L5				FAM149A						EPRS1
			INHBA	RASGRP1																		TMEM185A	EPHA10				FAM155B						EPS8L3
			INHBB	RASSF3																		TMEM186	ERBB3				FAM160B1						ERCC1
			INSIG1	RBM43																		TMEM208	ERCC4				FAM163A						ERCC6L2
			INSM1	RCSD1																		TMEM59	ERCC6				FAM163B						ERI2
			INSM2	RGMA																		TMPRSS12	ERG28				FAM168A						ERO1B
			INSYN2A	RGS1																		TMPRSS3	ERI3				FAM168B						ESF1
			IPCEF1	RGS10																		TMPRSS4	ERN1				FAM171B						ESPN
			IQCG	RGS18																		TNRC6A	ERO1A				FAM180A						ETHE1
			IRF6	RHOF																		TOMM7	ERP29				FAM180B						ETV5
			IRX3	RHOG																		TOP3B	ERP44				FAM183A						EXOC1
			IRX4	RNF135																		TPMT	ERRFI1				FAM187A						EXOC6
			IRX5	RNF213																		TRMU	ESD				FAM20B						EXOSC1
			ISM1	RRM1																		TRNAG-GCC_3	ESR1				FAM20C						EXOSC5
			ITGA3	RRM2																		TSC2	ESYT2				FAM217B						EXOSC6
			ITGB1	RSAD2																		TTC12	ETAA1				FAM219A						EXOSC7
			ITGB3	RUFY4																		TVP23A	ETFB				FAM228B						EXPH5
			ITGB3BP	RUNX3																		TXN	ETFRF1				FAM234B						EXTL1
			ITIH5	SAP30																		TXNDC17	EVC2				FAM32A						F11R
			ITPKB	SASH3																		UBAC2	EXOC3L4				FAM3B						F2RL1
			ITPRIPL2	SBNO2																		UBE2G1	EXOC7				FAM78A						F2RL3
			IVNS1ABP	SCPEP1																		UBE2I	EXOSC10				FAM8A1						FAAH2
			JADE2	SCTR																		UBE2O	F5				FAM91A1						FAAP100
			JAK3	SEC11C																		UBR4	FAAP20				FANCC						FAAP24
			JAZF1	SEC22C																		UBXN4	FABP2				FARP2						FABP6
			JKAMP	SELE																		UCHL5	FADD				FAXC						FAIM2
			JOSD1	SELPLG																		UPRT	FAH				FBF1						FAM104A
			JPT1	SEPHS1																		USP48	FAM117B				FBLIM1						FAM107A
			JUP	SERPING1																		UTP11	FAM118A				FBXL12						FAM110A
			KANK4	SGCA																		UTP6	FAM118B				FBXL13						FAM120A
			KAT6B	SH2D1A																		UTS2B	FAM131B				FBXL15						FAM136A
			KATNAL1	SH2D1B																		VCPKMT	FAM135A				FBXL20						FAM13B
			KCNA3	SH2D4B																		VEZT	FAM13C				FBXL3						FAM160A2
			KCNA5	SH3BP1																		VOPP1	FAM161B				FBXL4						FAM171A1
			KCNB2	SKAP1																		VPS37A	FAM169A				FBXL5						FAM171A2
			KCNC1	SLA																		VSNL1	FAM169B				FBXO31						FAM172A
			KCNC4	SLBP																		VTA1	FAM174A				FBXO45						FAM174C
			KCNE3	SLC17A9																		WDCP	FAM185A				FBXW2						FAM181B
			KCNE4	SLC22A18																		WDR45B	FAM207A				FDPS						FAM189A1
			KCNG1	SLC23A1																		WDR61	FAM210B				FDX2						FAM193A
			KCNG2	SLC25A25																		WDR75	FAM219B				FER1L5						FAM193B
			KCNG3	SLC27A3																		WDR92	FAM78B				FERMT2						FAM204A
			KCNH5	SLC2A6																		YAE1	FAM83B				FES						FAM214A
			KCNH8	SLC33A1																		YIPF3	FANCB				FGF18						FAM241A
			KCNIP2	SLC7A10																		YIPF6	FANCD2				FGF2						FAM43B
			KCNJ1	SMC2																		YLPM1	FANCI				FGF23						FAM76B
			KCNJ15	SMIM5																		ZBTB8A	FARS2				FGF5						FAM81A
			KCNJ16	SMPD4																		ZDHHC3	FASLG				FGF7						FAM83C
			KCNJ2	SOCS1																		ZFHX3	FASN				FGFBP2						FAM83F
			KCNJ4	SOCS3																		ZMIZ1	FBH1				FGFR1OP2						FAM98A
			KCNK10	SOD3																		ZNF330	FBLN7				FGFR3						FANCE
			KCNK12	SP6																		ZNF618	FBN1				FGFRL1						FANCF
			KCNK15	SPI1																		ZNF821	FBN2				FHDC1						FARSA
			KCNK18	SRGN																		ZPLD1	FBN3				FHOD3						FASTK
			KCNK9	STAB1																			FBXL17				FIBCD1						FBXL16
			KCNS1	STAT1																			FBXL22				FIP1L1						FBXO11
			KCTD8	STING1																			FBXO15				FKBP15						FBXO21
			KDM2B	STRA8																			FBXO3				FKBP4						FBXO30
			KDM4B	SUCNR1																			FBXO34				FKTN						FBXO32
			KDM4C	SYCP1																			FBXO38				FLCN						FBXO42
			KDM8	SYNE2																			FBXO39				FLT1						FBXO46
			KERA	SYT3																			FBXO41				FMN1						FBXO47
			KHDC4	SYTL1																			FBXO48				FMOD						FBXO8
			KHDRBS2	SYTL3																			FDXACB1				FNBP1						FBXW4
			KHDRBS3	TBX21																			FER				FNIP2						FBXW8
			KIAA0319	TEK																			FGD3				FOCAD						FBXW9
			KIAA0513	TENT5C																			FGD5				FOXL2						FCF1
			KIAA0895	TFEC																			FGF12				FOXN4						FCHO1
			KIAA1549	THEMIS																			FGGY				FOXO4						FCHSD2
			KIF23	TICAM1																			FH				FOXP4						FCSK
			KIF3A	TLR2																			FHAD1				FRG1						FDX1
			KIF4A	TLR3																			FHIT				FRMD4B						FEM1B
			KIFAP3	TLR5																			FICD				FRMD6						FEM1C
			KIT	TMEM140																			FIGNL2				FRMPD3						FETUB
			KITLG	TMEM144																			FKBP10				FRMPD4						FEZ1
			KLC1	TMEM156																			FKBP11				FRY						FEZ2
			KLF11	TMEM207																			FKBP3				FSIP1						FGF14
			KLF15	TMEM220																			FKBP5				FUBP3						FGF4
			KLF6	TMEM273																			FLAD1				FZD2						FGFBP3
			KLF7	TNFRSF13B																			FLOT2				FZR1						FGFR1
			KLHL1	TNFRSF18																			FLRT2				G3BP2						FGFR4
			KLHL14	TNFSF13B																			FMN2				G6PD						FILIP1L
			KLHL21	TOP2A																			FMNL1				GABPA						FJX1
			KLHL26	TOR1B																			FMNL3				GABRB2						FKBP1B
			KLHL40	TRADD																			FN3KRP				GADD45A						FKBP6
			KLHL5	TRAF3IP3																			FNBP1L				GADD45B						FKBP7
			KLHL8	TREM2																			FNIP1				GALNT15						FKBP8
			KMO	TRIM25																			FOS				GALNT16						FKRP
			KNG1	TRIM65																			FOXI3				GALT						FLVCR1
			KPNA4	TRMT5																			FOXP2				GANC						FMC1
			LAMA1	TRMT61A																			FRMD4A				GAPVD1						FMR1
			LAMB1	TTF2																			FRZB				GAR1						FNDC3A
			LAMB3	TXNDC5																			FSCN2				GAREM1						FNDC4
			LAP3	UBASH3A																			FSD2				GARNL3						FNDC7
			LAPTM4B	UBE2A																			FSIP2				GARRE1						FOSB
			LBH	UNC13D																			FUCA2				GART						FOXE1
			LCMT2	USP18																			FUT11				GAS2						FOXL3
			LEF1	VCAM1																			FUT7				GATA1						FOXQ1
			LEKR1	VRTN																			FXYD2				GATA4						FOXRED1
			LEMD3	VSIR																			FYB2				GATA6						FPGS
			LGALS8	WDFY4																			FZD3				GATAD2A						FRMD8
			LHFPL6	XCR1																			FZD5				GBF1						FRS2
			LHX6	YBEY																			G0S2				GBX1						FSD1
			LIAS	ZNFX1																			GABRA2				GCG						FSTL3
			LIMD1	ZP2																			GABRA4				GCHFR						FTO
			LIN7A																				GABRB1				GDF5						FTSJ3
			LIPC																				GABRB3				GDPD1						FUCA1
			LLGL2																				GADD45G				GDPD2						FURIN
			LMO3																				GALK2				GFPT2						FUT8
			LNP1																				GALNT3				GGA3						FUT9
			LNPK																				GAPDH				GGNBP2						FYN
			LNX1																				GARS1				GGPS1						FZD6
			LOC100189933																				GATC				GGT7						FZD9
			LOC100190505																				GATD3A				GIPR						G2E3
			LOC100190718																				GCDH				GJA3						G3BP1
			LOC100217831																				GCN1				GJA4						G6PC3
			LOC100217958																				GCNT1				GJA5						GAA
			LOC100218075																				GCSH				GJA8						GABRA6
			LOC100218233																				GDAP1L1				GJB3						GABRP
			LOC100218462																				GDE1				GJC1						GABRR3
			LOC100218634																				GDF10				GJC2						GADD45GIP1
			LOC100218703																				GDF9				GK						GADL1
			LOC100218721																				GDI2				GLCCI1						GALE
			LOC100218725																				GDNF				GLCE						GALK1
			LOC100218765																				GEMIN8				GLG1						GALNT1
			LOC100219101																				GET1				GLP2R						GALNT10
			LOC100219177																				GHDC				GLRB						GALNT4
			LOC100219242																				GID4				GLT8D1						GALNT5
			LOC100219398																				GIPC2				GLYR1						GAMT
			LOC100219425																				GIPC3				GMCL1						GAS1
			LOC100219651																				GJA10				GMDS						GAS2L1
			LOC100219825																				GJA9				GMPR						GAS2L3
			LOC100219910																				GLA				GNA11						GAS8
			LOC100220064																				GLDN				GNAO1						GASK1B
			LOC100220115																				GLI2				GNAT2						GBE1
			LOC100220117																				GLI3				GNB4						GCC1
			LOC100220162																				GLIS3				GNB5						GCM1
			LOC100220428																				GLMP				GNG12						GCM2
			LOC100220557																				GLRX2				GNG7						GDF1
			LOC100220650																				GLT8D2				GNPTAB						GDF15
			LOC100220698																				GLTP				GOLGA3						GDPGP1
			LOC100220712																				GLUL				GOSR1						GFRA2
			LOC100220937																				GNA12				GOSR2						GGCX
			LOC100221073																				GNAI2				GP1BB						GGT5
			LOC100221075																				GNAL				GP9						GINS1
			LOC100221095																				GNAZ				GPAM						GINS4
			LOC100221324																				GNG10				GPAT2						GIT1
			LOC100221492																				GNG3				GPATCH2L						GJD3
			LOC100221517																				GNG5				GPATCH3						GLB1L
			LOC100221534																				GNL1				GPBP1L1						GLI1
			LOC100221615																				GNL2				GPCPD1						GLMN
			LOC100221700																				GNMT				GPM6B						GLRX3
			LOC100221786																				GNPAT				GPN3						GLS
			LOC100221884																				GNPTG				GPR107						GM2A
			LOC100221947																				GOLGA7				GPR139						GMEB2
			LOC100222119																				GOLGA7B				GPR155						GMPPA
			LOC100222288																				GOLM2				GPR158						GMPS
			LOC100222345																				GOT1				GPR182						GNA13
			LOC100222403																				GPATCH1				GPR26						GNAI3
			LOC100222632																				GPATCH4				GPR50						GNG13
			LOC100222702																				GPATCH8				GPR75						GNL3
			LOC100222802																				GPD2				GPR89B						GNPDA2
			LOC100222906																				GPR15				GRAMD1B						GNS
			LOC100223131																				GPR161				GRAMD4						GOLGA1
			LOC100223232																				GPR17				GREB1						GOLGB1
			LOC100223270																				GPR19				GRIA3						GOLIM4
			LOC100223320																				GPR3				GRIA4						GOLPH3L
			LOC100223335																				GPR63				GRID1						GPAA1
			LOC100223410																				GPRC5C				GRIK3						GPATCH2
			LOC100223643																				GPRIN2				GRIK4						GPBP1
			LOC100223670																				GPSM1				GRIN2A						GPC3
			LOC100223684																				GPX1				GRIN2D						GPC6
			LOC100223718																				GPX3				GRK5						GPR141
			LOC100223725																				GPX4				GRM5						GPR162
			LOC100223776																				GRAMD1C				GRPEL2						GPR171
			LOC100223936																				GRAMD2B				GRSF1						GPR183
			LOC100224071																				GREM2				GSG1L2						GPR37L1
			LOC100224101																				GRHL2				GSN						GPR61
			LOC100224234																				GRHL3				GSPT1						GPRC6A
			LOC100224358																				GRIA1				GSR						GPRIN1
			LOC100224590																				GRIA2				GSS						GRHPR
			LOC100224754																				GRID2				GSX2						GRK2
			LOC100224802																				GRIFIN				GTPBP6						GRK7
			LOC100224907																				GRIK2				GTPBP8						GRM4
			LOC100224950																				GRK3				GUCY1B1						GRN
			LOC100224972																				GRK4				GUCY2C						GRXCR2
			LOC100225066																				GSC				H2AFV						GSAP
			LOC100225076																				GSC2				H3F3A						GSX1
			LOC100225145																				GSTK1				H3F3B						GTF2A1
			LOC100225216																				GTDC1				HABP4						GTF2H5
			LOC100225286																				GTF2E2				HAPLN3						GTF3C2
			LOC100225337																				GTF2I				HARS1						GTPBP3
			LOC100225458																				GTF3A				HAUS1						GUCD1
			LOC100225532																				GTF3C1				HAUS3						GULP1
			LOC100225627																				GTPBP1				HBAA						GUSB
			LOC100225641																				GTPBP4				HBAD						GXYLT2
			LOC100225683																				GUF1				HDAC1						GZF1
			LOC100225782																				GYG2				HDAC2						HAAO
			LOC100225836																				H6PD				HDDC2						HAGH
			LOC100225858																				HACD1				HDHD5						HAO2
			LOC100225865																				HADH				HEATR3						HAP1
			LOC100225878																				HAPLN2				HEATR5B						HAPLN4
			LOC100225918																				HAS3				HECTD1						HAX1
			LOC100225968																				HAUS2				HECTD4						HBE1
			LOC100225999																				HAUS6				HECW1						HBP1
			LOC100226434																				HCFC2				HEG1						HBS1L
			LOC100226449																				HCK				HELLS						HDAC3
			LOC100226496																				HCRTR2				HEMGN						HDAC5
			LOC100226503																				HDAC11				HGFAC						HDAC7
			LOC100226671																				HDAC9				HGSNAT						HDC
			LOC100226727																				HDGF				HID1						HDDC3
			LOC100226888																				HDGFL2				HIF1AN						HDHD3
			LOC100226894																				HDHD2				HIKESHI						HECA
			LOC100226903																				HEATR1				HIP1R						HECTD3
			LOC100226962																				HEATR5A				HK1						HELQ
			LOC100226970																				HEBP2				HLTF						HENMT1
			LOC100227069																				HECTD2				HLX						HEPACAM
			LOC100227654																				HECW2				HMBOX1						HEPHL1
			LOC100227698																				HEMK1				HMBS						HERC4
			LOC100227703																				HERC1				HMG20A						HEXA
			LOC100227800																				HERC2				HMGCLL1						HEXIM1
			LOC100227872																				HERC3				HMGXB3						HEYL
			LOC100227924																				HEXD				HMX1						HGS
			LOC100228012																				HFM1				HNRNPA2B1						HIC1
			LOC100228068																				HHATL				HNRNPDL						HIGD2A
			LOC100228113																				HHIPL2				HNRNPH3						HINFP
			LOC100228204																				HHLA1				HOMER3						HINT1
			LOC100228216																				HIBADH				HOOK3						HINT2
			LOC100228263																				HIF1A				HOXB8						HJV
			LOC100228587																				HIGD1A				HP1BP3						HMG20B
			LOC100228737																				HIPK2				HPGD						HMGCL
			LOC100228865																				HIVEP3				HPS3						HNF4A
			LOC100228927																				HM13				HPS6						HNF4G
			LOC100228968																				HMCES				HR						HNRNPA1
			LOC100229133																				HMCN1				HRG						HNRNPA3
			LOC100229165																				HMCN2				HROB						HNRNPAB
			LOC100229225																				HMGA1				HSD17B7						HNRNPH1
			LOC100229315																				HMGB2				HSF2BP						HNRNPK
			LOC100229350																				HMGN2				HSPA12A						HNRNPL
			LOC100229676																				HMGN3				HSPA13						HNRNPM
			LOC100229734																				HMOX2				HTT						HNRNPR
			LOC100229852																				HNF1A				HUWE1						HOGA1
			LOC100229855																				HNRNPD				HYAL3						HOOK2
			LOC100230293																				HOMER1				HYLS1						HOXC13
			LOC100230322																				HOOK1				IARS1						HPS1
			LOC100230541																				HORMAD1				ID1						HRH1
			LOC100230766																				HORMAD2				ID3						HS2ST1
			LOC100231148																				HPCA				ID4						HSCB
			LOC100231233																				HPGDS				IDE						HSD17B1
			LOC100231240																				HPRT1				IDH1						HSD17B10
			LOC100231322																				HPS4				IDH3A						HTATIP2
			LOC100231339																				HPSE2				IDO2						HTATSF1
			LOC100231426																				HRAS				IDUA						HTR1A
			LOC100231450																				HS3ST6				IER5L						HTR2A
			LOC100231660																				HS6ST1				IFNAR1						HYI
			LOC100231740																				HSD3B7				IFRD2						HYPK
			LOC100231862																				HSDL2				IFT122						IBA57
			LOC100232037																				HSF2				IFT57						IBTK
			LOC100232098																				HSPB11				IGFBP5						ICAM5
			LOC100232125																				HSPE1				IGFN1						ICMT
			LOC100232129																				HTRA1				IGSF6						IDH3B
			LOC100232228																				HTRA2				IKBKB						IER5
			LOC100232263																				IAH1				IKZF5						IFNLR1
			LOC100232309																				IARS2				IL6R						IFT22
			LOC100232323																				ICE1				IL6ST						IGBP1
			LOC100232358																				ICOSLG				ILRUN						IGF2BP2
			LOC100232469																				IDH2				IMPACT						IGFBP3
			LOC100232561																				IDNK				IMPG1						IGSF21
			LOC100232580																				IDS				INAVA						IKBKG
			LOC100232645																				IFFO2				ING1						IL13RA1
			LOC100232659																				IFITM10				ING2						IL13RA2
			LOC101232903																				IFNAR2				INPP4A						IL17RC
			LOC101232981																				IFT140				INPP5E						IL17RD
			LOC101233001																				IFT172				INSIG2						IL18
			LOC101233028																				IFT20				INTS12						IL1RAPL1
			LOC101233115																				IFT46				INTS4						IL1RAPL2
			LOC101233154																				IFT88				IP6K3						IL20RA
			LOC101233334																				IGDCC3				IPMK						IL21
			LOC101233398																				IGDCC4				IPO11						IL26
			LOC101233471																				IGF1				IPO7						ILF2
			LOC101233572																				IGF2BP1				IPO8						ILF3
			LOC101233722																				IGFALS				IPO9						ILK
			LOC101233796																				IGFBP2				IPP						IMP4
			LOC101233818																				IGSF10				IPPK						IMPDH2
			LOC101233947																				IGSF11				IQSEC1						INA
			LOC101234101																				IGSF9B				IRF2BP2						INAFM2
			LOC101234217																				IK				IRS4						ING4
			LOC101234234																				IKZF2				IRX1						INKA1
			LOC105758548																				IL10RB				IRX2						INKA2
			LOC105758559																				IL16				IST1						INO80B
			LOC105758560																				IL1B				ITCH						INTS3
			LOC105758586																				IL22RA2				ITGA1						INTS5
			LOC105758604																				IL31RA				ITGB4						INTS8
			LOC105758645																				IL34				ITPK1						IP6K1
			LOC105758692																				IL4I1				ITSN1						IPO13
			LOC105758723																				IMMT				JADE3						IQCA1
			LOC105758737																				IMPG2				JMJD4						IQCB1
			LOC105758763																				INHA				JMJD6						IQCE
			LOC105758852																				INO80				JUN						IQUB
			LOC105758854																				INPP5B				KANSL1L						IREB2
			LOC105758906																				INPP5F				KBTBD12						IRF2BPL
			LOC105758928																				INTS1				KBTBD2						IRF5
			LOC105758985																				INTS11				KCNA4						IRX6
			LOC105759051																				INTS2				KCNAB1						ISG20L2
			LOC105759056																				INTS6				KCNB1						ISX
			LOC105759117																				INTS7				KCNIP3						ISYNA1
			LOC105759161																				INTU				KCNK1						ITGA10
			LOC105759204																				IQCH				KCNQ3						ITGA2B
			LOC105759327																				IQGAP1				KCNQ4						ITGB6
			LOC105759360																				IRAK1BP1				KCTD12						ITPA
			LOC105759652																				ISCU				KCTD2						ITPR3
			LOC105760369																				ISY1				KCTD21						ITPRID2
			LOC105760502																				ITGA2				KCTD3						JAG1
			LOC105760690																				ITGB1BP2				KCTD7						JAG2
			LOC105760697																				ITM2C				KCTD9						JAGN1
			LOC105760871																				ITPR1				KDM3A						JAK1
			LOC105760944																				ITSN2				KDM3B						JAK2
			LOC115490551																				IWS1				KDM4A						JAKMIP1
			LOC115490602																				JADE1				KHDRBS1						JAM2
			LOC115490629																				JAKMIP2				KIAA0825						JMJD1C
			LOC115490726																				JAKMIP3				KIAA1109						JMJD8
			LOC115490735																				JARID2				KIAA1958						JOSD2
			LOC115490742																				JCAD				KIAA2013						JPH2
			LOC115490793																				JMY				KIDINS220						JUND
			LOC115490836																				JPH1				KIF11						KANSL1
			LOC115490876																				KALRN				KIF13B						KANSL2
			LOC115490899																				KANK3				KIF1A						KANSL3
			LOC115490931																				KAT6A				KIF1B						KAT2A
			LOC115490946																				KAZALD1				KIF20B						KAT2B
			LOC115490948																				KBTBD13				KIF21B						KAT5
			LOC115490951																				KBTBD3				KIF26B						KAT7
			LOC115490959																				KCNH1				KIF3B						KAT8
			LOC115490981																				KCNH4				KIF5C						KATNAL2
			LOC115490992																				KCNH6				KIRREL1						KATNBL1
			LOC115491049																				KCNJ8				KIZ						KBTBD11
			LOC115491050																				KCNK17				KLB						KBTBD4
			LOC115491063																				KCNN2				KLF12						KBTBD8
			LOC115491065																				KCNQ1				KLHDC2						KCNAB2
			LOC115491071																				KCNRG				KLHL11						KCNH7
			LOC115491084																				KCNS3				KLHL13						KCNJ10
			LOC115491117																				KCNV1				KLHL20						KCNJ5
			LOC115491118																				KCTD10				KLHL22						KCNK13
			LOC115491133																				KCTD15				KLHL29						KCNMB2
			LOC115491135																				KCTD17				KLHL30						KCNN1
			LOC115491141																				KCTD18				KLHL32						KCNT2
			LOC115491143																				KCTD6				KLHL34						KDM2A
			LOC115491145																				KDELR2				KLHL7						KDM6A
			LOC115491158																				KDM1B				KMT2A						KEAP1
			LOC115491160																				KDM5A				KMT5A						KHK
			LOC115491174																				KDM7A				KNOP1						KHSRP
			LOC115491184																				KIAA0753				KNTC1						KIAA0232
			LOC115491185																				KIAA1191				KPNA1						KIAA0586
			LOC115491211																				KIAA1217				KPNA5						KIAA0895L
			LOC115491222																				KIAA1328				KRT18						KIAA1143
			LOC115491233																				KIAA1755				KRT20						KIAA1614
			LOC115491243																				KIAA1841				KRTCAP2						KIF14
			LOC115491266																				KIAA2026				KSR2						KIF15
			LOC115491279																				KIF13A				KTN1						KIF21A
			LOC115491284																				KIF27				KY						KIRREL3
			LOC115491367																				KIF2A				L3MBTL1						KLC4
			LOC115491449																				KIF6				L3MBTL3						KLF3
			LOC115491471																				KIFBP				LACTBL1						KLF8
			LOC115491512																				KLHDC1				LAMP2						KLHDC3
			LOC115491517																				KLHDC10				LANCL1						KLHDC8A
			LOC115491520																				KLHDC8B				LANCL2						KLHL12
			LOC115491552																				KLHL2				LATS2						KLHL25
			LOC115491633																				KLHL24				LCORL						KLHL28
			LOC115491649																				KLHL33				LCTL						KLHL42
			LOC115491783																				KLHL4				LDLRAD1						KMT2C
			LOC115491912																				KMT2E				LEO1						KMT5B
			LOC115492139																				KNDC1				LETM1						KRAS
			LOC115492167																				KPNA6				LFNG						KRI1
			LOC115492204																				KPNB1				LGALS3						KRT222
			LOC115492329																				KRIT1				LGI2						KRTCAP3
			LOC115492379																				KYAT1				LGSN						KTI12
			LOC115492382																				KYAT3				LHX1						KXD1
			LOC115492434																				L3HYPDH				LIG3						L2HGDH
			LOC115492465																				LAD1				LIMA1						LAMA3
			LOC115492472																				LAMA4				LIMCH1						LAMTOR2
			LOC115492481																				LAMA5				LIMS2						LAMTOR4
			LOC115492536																				LAMP1				LIN7C						LAMTOR5
			LOC115492615																				LAMP3				LIPG						LARGE2
			LOC115492653																				LAMTOR1				LIX1L						LARP4
			LOC115492732																				LAMTOR3				LMBR1						LARP6
			LOC115493072																				LANCL3				LMCD1						LARS2
			LOC115493093																				LARGE1				LMNA						LATS1
			LOC115493100																				LARP1B				LMO4						LAYN
			LOC115493238																				LARP7				LMO7						LDB1
			LOC115493334																				LAT2				LMTK2						LDB3
			LOC115493351																				LCA5L				LOC100189956						LDLRAD3
			LOC115493353																				LCAT				LOC100189957						LEMD2
			LOC115493359																				LCLAT1				LOC100189978						LGALSL
			LOC115493363																				LDAH				LOC100190031						LGI3
			LOC115493369																				LDHB				LOC100190348						LHFPL4
			LOC115493372																				LDLR				LOC100190538						LHX5
			LOC115493377																				LECT2				LOC100190585						LHX8
			LOC115493394																				LEPROT				LOC100190592						LIG4
			LOC115493395																				LEPROTL1				LOC100190610						LIMK1
			LOC115493407																				LHFPL3				LOC100190622						LIMS1
			LOC115493414																				LHFPL5				LOC100217539						LIN52
			LOC115493418																				LHX2				LOC100217561						LINGO1
			LOC115493435																				LHX9				LOC100217839						LITAFD
			LOC115493437																				LIFR				LOC100217864						LLGL1
			LOC115493440																				LIN28A				LOC100217899						LMAN2
			LOC115493470																				LIN9				LOC100218088						LMAN2L
			LOC115493488																				LINGO2				LOC100218258						LMBR1L
			LOC115493518																				LMLN				LOC100218287						LMF1
			LOC115493520																				LMNB2				LOC100218308						LMF2
			LOC115493543																				LOC100144431				LOC100218354						LMO2
			LOC115493627																				LOC100189932				LOC100218406						LNPEP
			LOC115493649																				LOC100190001				LOC100218614						LOC100189947
			LOC115493650																				LOC100190002				LOC100218769						LOC100190229
			LOC115493667																				LOC100190026				LOC100218844						LOC100190325
			LOC115493713																				LOC100190094				LOC100218870						LOC100190336
			LOC115493729																				LOC100190115				LOC100218887						LOC100190410
			LOC115493758																				LOC100190135				LOC100218902						LOC100190442
			LOC115493776																				LOC100190137				LOC100219000						LOC100190507
			LOC115493780																				LOC100190143				LOC100219141						LOC100190731
			LOC115493786																				LOC100190204				LOC100219145						LOC100217780
			LOC115493795																				LOC100190249				LOC100219300						LOC100217844
			LOC115493800																				LOC100190340				LOC100219353						LOC100217866
			LOC115493809																				LOC100190349				LOC100219615						LOC100217869
			LOC115493854																				LOC100190355				LOC100219821						LOC100218141
			LOC115493863																				LOC100190416				LOC100219985						LOC100218173
			LOC115493865																				LOC100190467				LOC100220137						LOC100218227
			LOC115493890																				LOC100190491				LOC100220296						LOC100218271
			LOC115493906																				LOC100190573				LOC100220302						LOC100218307
			LOC115493921																				LOC100190699				LOC100220399						LOC100218384
			LOC115493926																				LOC100190710				LOC100220716						LOC100218564
			LOC115493951																				LOC100190722				LOC100220738						LOC100218573
			LOC115493971																				LOC100217480				LOC100220866						LOC100218590
			LOC115493981																				LOC100217703				LOC100220906						LOC100218704
			LOC115493990																				LOC100217786				LOC100220938						LOC100218816
			LOC115493992																				LOC100217858				LOC100220956						LOC100218845
			LOC115494002																				LOC100217918				LOC100220978						LOC100218864
			LOC115494004																				LOC100218016				LOC100221170						LOC100218918
			LOC115494019																				LOC100218152				LOC100221212						LOC100218923
			LOC115494042																				LOC100218246				LOC100221217						LOC100219169
			LOC115494055																				LOC100218400				LOC100221272						LOC100219182
			LOC115494089																				LOC100218528				LOC100221326						LOC100219254
			LOC115494103																				LOC100218541				LOC100221606						LOC100219283
			LOC115494112																				LOC100218598				LOC100221727						LOC100219287
			LOC115494129																				LOC100218707				LOC100221738						LOC100219442
			LOC115494251																				LOC100218804				LOC100221763						LOC100219445
			LOC115494257																				LOC100218848				LOC100221794						LOC100219447
			LOC115494258																				LOC100218930				LOC100221889						LOC100219485
			LOC115494274																				LOC100218931				LOC100221985						LOC100219500
			LOC115494347																				LOC100218933				LOC100222002						LOC100219596
			LOC115494356																				LOC100218935				LOC100222067						LOC100219794
			LOC115494366																				LOC100218943				LOC100222284						LOC100219814
			LOC115494367																				LOC100219050				LOC100222299						LOC100219950
			LOC115494397																				LOC100219073				LOC100222342						LOC100220427
			LOC115494406																				LOC100219113				LOC100222370						LOC100220663
			LOC115494435																				LOC100219379				LOC100222462						LOC100220727
			LOC115494441																				LOC100219450				LOC100222525						LOC100220728
			LOC115494447																				LOC100219720				LOC100222646						LOC100220758
			LOC115494461																				LOC100219721				LOC100222749						LOC100220790
			LOC115494477																				LOC100219970				LOC100222819						LOC100220927
			LOC115494480																				LOC100219971				LOC100222956						LOC100221139
			LOC115494505																				LOC100219992				LOC100223012						LOC100221364
			LOC115494521																				LOC100220060				LOC100223250						LOC100221377
			LOC115494524																				LOC100220079				LOC100223347						LOC100221382
			LOC115494525																				LOC100220107				LOC100223445						LOC100221408
			LOC115494539																				LOC100220148				LOC100223458						LOC100221461
			LOC115494624																				LOC100220263				LOC100223531						LOC100221646
			LOC115494662																				LOC100220385				LOC100223548						LOC100221837
			LOC115494689																				LOC100220430				LOC100223619						LOC100221862
			LOC115494715																				LOC100220586				LOC100223778						LOC100221865
			LOC115494788																				LOC100220603				LOC100223824						LOC100221946
			LOC115494803																				LOC100220617				LOC100223925						LOC100222137
			LOC115494806																				LOC100220618				LOC100224131						LOC100222286
			LOC115494816																				LOC100220634				LOC100224152						LOC100222320
			LOC115494823																				LOC100220647				LOC100224235						LOC100222482
			LOC115494833																				LOC100220690				LOC100224263						LOC100222731
			LOC115494862																				LOC100220715				LOC100224313						LOC100222777
			LOC115494877																				LOC100220722				LOC100224487						LOC100223004
			LOC115494883																				LOC100220740				LOC100224495						LOC100223162
			LOC115494885																				LOC100220754				LOC100224543						LOC100223312
			LOC115494887																				LOC100220760				LOC100224564						LOC100223493
			LOC115494888																				LOC100220775				LOC100224567						LOC100223651
			LOC115494899																				LOC100220846				LOC100224616						LOC100223789
			LOC115494906																				LOC100220853				LOC100224854						LOC100223798
			LOC115494911																				LOC100220872				LOC100225136						LOC100223864
			LOC115494920																				LOC100221041				LOC100225322						LOC100223967
			LOC115494925																				LOC100221185				LOC100225355						LOC100224272
			LOC115494954																				LOC100221285				LOC100225407						LOC100224284
			LOC115494994																				LOC100221337				LOC100225453						LOC100224290
			LOC115495013																				LOC100221413				LOC100225462						LOC100224299
			LOC115495016																				LOC100221426				LOC100225533						LOC100224303
			LOC115495017																				LOC100221432				LOC100225686						LOC100224401
			LOC115495033																				LOC100221672				LOC100225871						LOC100224575
			LOC115495049																				LOC100221796				LOC100225953						LOC100224585
			LOC115495054																				LOC100221871				LOC100226015						LOC100224667
			LOC115495062																				LOC100221958				LOC100226079						LOC100224894
			LOC115495077																				LOC100221986				LOC100226089						LOC100225005
			LOC115495135																				LOC100221996				LOC100226104						LOC100225060
			LOC115495144																				LOC100222224				LOC100226245						LOC100225213
			LOC115495200																				LOC100222277				LOC100226342						LOC100225592
			LOC115495216																				LOC100222319				LOC100226571						LOC100225594
			LOC115495218																				LOC100222344				LOC100226641						LOC100225609
			LOC115495219																				LOC100222418				LOC100226679						LOC100225909
			LOC115495230																				LOC100222565				LOC100226706						LOC100226145
			LOC115495244																				LOC100222616				LOC100226788						LOC100226207
			LOC115495266																				LOC100222883				LOC100226809						LOC100226230
			LOC115495271																				LOC100222897				LOC100226875						LOC100226286
			LOC115495309																				LOC100222908				LOC100226900						LOC100226294
			LOC115495316																				LOC100223114				LOC100226913						LOC100226305
			LOC115495332																				LOC100223260				LOC100227062						LOC100226555
			LOC115495360																				LOC100223408				LOC100227175						LOC100226560
			LOC115495381																				LOC100223460				LOC100227296						LOC100226561
			LOC115495452																				LOC100223512				LOC100227445						LOC100226673
			LOC115495463																				LOC100223640				LOC100227500						LOC100226820
			LOC115495482																				LOC100223728				LOC100227533						LOC100226843
			LOC115495486																				LOC100224150				LOC100227551						LOC100226896
			LOC115495498																				LOC100224236				LOC100227609						LOC100227010
			LOC115495510																				LOC100224318				LOC100227710						LOC100227201
			LOC115495531																				LOC100224354				LOC100227828						LOC100227325
			LOC115495534																				LOC100224449				LOC100227831						LOC100227365
			LOC115495537																				LOC100224489				LOC100227837						LOC100227411
			LOC115495588																				LOC100224497				LOC100228103						LOC100227464
			LOC115495593																				LOC100224554				LOC100228139						LOC100227536
			LOC115495598																				LOC100224572				LOC100228270						LOC100227575
			LOC115495624																				LOC100224677				LOC100228369						LOC100227578
			LOC115495637																				LOC100224698				LOC100228395						LOC100227652
			LOC115495646																				LOC100224823				LOC100228420						LOC100227878
			LOC115495654																				LOC100224843				LOC100228479						LOC100227898
			LOC115495672																				LOC100224866				LOC100228501						LOC100227999
			LOC115495681																				LOC100225003				LOC100228608						LOC100228000
			LOC115495691																				LOC100225050				LOC100228612						LOC100228027
			LOC115495696																				LOC100225057				LOC100228682						LOC100228221
			LOC115495716																				LOC100225095				LOC100228717						LOC100228280
			LOC115495745																				LOC100225196				LOC100228959						LOC100228347
			LOC115495796																				LOC100225224				LOC100229022						LOC100228594
			LOC115495798																				LOC100225248				LOC100229107						LOC100228780
			LOC115495809																				LOC100225279				LOC100229126						LOC100228856
			LOC115495814																				LOC100225287				LOC100229420						LOC100228861
			LOC115495834																				LOC100225375				LOC100229528						LOC100228872
			LOC115495845																				LOC100225436				LOC100229572						LOC100228906
			LOC115495886																				LOC100225471				LOC100229618						LOC100228958
			LOC115495899																				LOC100225628				LOC100229648						LOC100228990
			LOC115495914																				LOC100225730				LOC100229692						LOC100229266
			LOC115495933																				LOC100225784				LOC100229718						LOC100229347
			LOC115495961																				LOC100225801				LOC100229828						LOC100229557
			LOC115496028																				LOC100226365				LOC100229858						LOC100229630
			LOC115496040																				LOC100226418				LOC100229925						LOC100229685
			LOC115496050																				LOC100226446				LOC100230051						LOC100229710
			LOC115496078																				LOC100226600				LOC100230178						LOC100229769
			LOC115496083																				LOC100226754				LOC100230245						LOC100229864
			LOC115496092																				LOC100226815				LOC100230278						LOC100229913
			LOC115496148																				LOC100226846				LOC100230549						LOC100229929
			LOC115496166																				LOC100226912				LOC100230587						LOC100230025
			LOC115496207																				LOC100226935				LOC100230622						LOC100230156
			LOC115496209																				LOC100227038				LOC100230638						LOC100230168
			LOC115496210																				LOC100227087				LOC100230755						LOC100230182
			LOC115496215																				LOC100227202				LOC100230872						LOC100230310
			LOC115496219																				LOC100227231				LOC100231107						LOC100230361
			LOC115496221																				LOC100227272				LOC100231131						LOC100230413
			LOC115496222																				LOC100227298				LOC100231134						LOC100230531
			LOC115496229																				LOC100227392				LOC100231371						LOC100230674
			LOC115496230																				LOC100227476				LOC100231488						LOC100230856
			LOC115496235																				LOC100227542				LOC100231559						LOC100230972
			LOC115496240																				LOC100227651				LOC100231572						LOC100231014
			LOC115496241																				LOC100227695				LOC100231703						LOC100231116
			LOC115496251																				LOC100227781				LOC100231768						LOC100231234
			LOC115496255																				LOC100227840				LOC100231840						LOC100231535
			LOC115496265																				LOC100227862				LOC100232028						LOC100231542
			LOC115496280																				LOC100228060				LOC100232233						LOC100231625
			LOC115496286																				LOC100228106				LOC100232247						LOC100231670
			LOC115496300																				LOC100228109				LOC100232344						LOC100231893
			LOC115496309																				LOC100228336				LOC100232392						LOC100231911
			LOC115496320																				LOC100228379				LOC100232607						LOC100232219
			LOC115496350																				LOC100228474				LOC100232749						LOC100232364
			LOC115496354																				LOC100228529				LOC100232776						LOC100232372
			LOC115496355																				LOC100228799				LOC100232832						LOC100232461
			LOC115496356																				LOC100228937				LOC101232941						LOC100232483
			LOC115496358																				LOC100229057				LOC101232953						LOC100232594
			LOC115496359																				LOC100229162				LOC101232977						LOC100232745
			LOC115496360																				LOC100229177				LOC101233072						LOC101232870
			LOC115496366																				LOC100229249				LOC101233155						LOC101233052
			LOC115496369																				LOC100229272				LOC101233353						LOC101233224
			LOC115496371																				LOC100229276				LOC101233507						LOC101233247
			LOC115496373																				LOC100229402				LOC101233586						LOC101233280
			LOC115496376																				LOC100229407				LOC101233588						LOC101233360
			LOC115496380																				LOC100229438				LOC101233610						LOC101233387
			LOC115496381																				LOC100229624				LOC101233650						LOC101233511
			LOC115496388																				LOC100229701				LOC101233664						LOC101234090
			LOC115496391																				LOC100229817				LOC101233692						LOC101234180
			LOC115496422																				LOC100229886				LOC101233732						LOC101234219
			LOC115496431																				LOC100229898				LOC101233767						LOC101234247
			LOC115496437																				LOC100230113				LOC101233937						LOC105758517
			LOC115496442																				LOC100230122				LOC101234062						LOC105758620
			LOC115496443																				LOC100230258				LOC101234162						LOC105758623
			LOC115496467																				LOC100230284				LOC101234170						LOC105758644
			LOC115496469																				LOC100230724				LOC101234259						LOC105758753
			LOC115496474																				LOC100230849				LOC105758514						LOC105758775
			LOC115496477																				LOC100230859				LOC105758561						LOC105758793
			LOC115496478																				LOC100230890				LOC105758587						LOC105758838
			LOC115496552																				LOC100230949				LOC105758603						LOC105758912
			LOC115496555																				LOC100231047				LOC105758667						LOC105758993
			LOC115496556																				LOC100231121				LOC105758668						LOC105759092
			LOC115496573																				LOC100231284				LOC105758694						LOC105759121
			LOC115496647																				LOC100231303				LOC105758698						LOC105759147
			LOC115496651																				LOC100231317				LOC105758733						LOC105759165
			LOC115496658																				LOC100231554				LOC105758748						LOC105759242
			LOC115496659																				LOC100231656				LOC105758803						LOC105759261
			LOC115496660																				LOC100231678				LOC105758935						LOC105759267
			LOC115496736																				LOC100231709				LOC105758956						LOC105759314
			LOC115496751																				LOC100231722				LOC105759055						LOC105759353
			LOC115496755																				LOC100231733				LOC105759069						LOC105759438
			LOC115496764																				LOC100231824				LOC105759171						LOC105759524
			LOC115496794																				LOC100231934				LOC105759208						LOC105759815
			LOC115496813																				LOC100231949				LOC105759233						LOC105759937
			LOC115496814																				LOC100232010				LOC105759260						LOC105759942
			LOC115496819																				LOC100232073				LOC105759265						LOC105760079
			LOC115496832																				LOC100232087				LOC105759325						LOC105760147
			LOC115496833																				LOC100232212				LOC105759356						LOC105760210
			LOC115496836																				LOC100232337				LOC105759492						LOC105760726
			LOC115496840																				LOC100232360				LOC105759510						LOC105760850
			LOC115496857																				LOC100232471				LOC105759685						LOC105760861
			LOC115496868																				LOC100232617				LOC105759741						LOC105760863
			LOC115496885																				LOC100232706				LOC105759787						LOC105760990
			LOC115496890																				LOC100232751				LOC105760408						LOC105760992
			LOC115496894																				LOC100232794				LOC105760446						LOC115490584
			LOC115496898																				LOC101233002				LOC105760489						LOC115490595
			LOC115496912																				LOC101233349				LOC105760670						LOC115490615
			LOC115496927																				LOC101233446				LOC105760824						LOC115490677
			LOC115496941																				LOC101233484				LOC105760940						LOC115490683
			LOC115496951																				LOC101233523				LOC105760993						LOC115490694
			LOC115496952																				LOC101233662				LOC105760997						LOC115490839
			LOC115496969																				LOC101233672				LOC105760998						LOC115490840
			LOC115496970																				LOC101233680				LOC115490593						LOC115490883
			LOC115496972																				LOC101233820				LOC115490603						LOC115490941
			LOC115496973																				LOC101233878				LOC115490606						LOC115490987
			LOC115496975																				LOC101233925				LOC115490628						LOC115490990
			LOC115496977																				LOC101233943				LOC115490633						LOC115491002
			LOC115496979																				LOC101234119				LOC115490655						LOC115491017
			LOC115496981																				LOC101234126				LOC115490676						LOC115491018
			LOC115496982																				LOC101234248				LOC115490737						LOC115491019
			LOC115497102																				LOC105758485				LOC115490739						LOC115491022
			LOC115497109																				LOC105758607				LOC115490748						LOC115491023
			LOC115497111																				LOC105758841				LOC115490768						LOC115491025
			LOC115497130																				LOC105758871				LOC115490769						LOC115491028
			LOC115497134																				LOC105758909				LOC115490770						LOC115491067
			LOC115497139																				LOC105758914				LOC115490815						LOC115491091
			LOC115497146																				LOC105758955				LOC115490825						LOC115491096
			LOC115497152																				LOC105759005				LOC115490831						LOC115491122
			LOC115497171																				LOC105759009				LOC115490834						LOC115491129
			LOC115497211																				LOC105759025				LOC115490863						LOC115491140
			LOC115497224																				LOC105759036				LOC115490864						LOC115491170
			LOC115497272																				LOC105759119				LOC115490885						LOC115491188
			LOC115497275																				LOC105759140				LOC115490917						LOC115491191
			LOC115497286																				LOC105759159				LOC115490935						LOC115491251
			LOC115497320																				LOC105759170				LOC115490947						LOC115491262
			LOC115497345																				LOC105759181				LOC115490980						LOC115491286
			LOC115497347																				LOC105759289				LOC115491026						LOC115491292
			LOC115497359																				LOC105759473				LOC115491059						LOC115491296
			LOC115497375																				LOC105759512				LOC115491064						LOC115491327
			LOC115497376																				LOC105760106				LOC115491066						LOC115491354
			LOC115497396																				LOC105760188				LOC115491075						LOC115491432
			LOC115497402																				LOC105760648				LOC115491090						LOC115491475
			LOC115497415																				LOC105760701				LOC115491106						LOC115491482
			LOC115497418																				LOC105760756				LOC115491125						LOC115491486
			LOC115497531																				LOC105760826				LOC115491137						LOC115491489
			LOC115497574																				LOC105760853				LOC115491152						LOC115491506
			LOC115497579																				LOC105760973				LOC115491165						LOC115491507
			LOC115497585																				LOC115490530				LOC115491175						LOC115491526
			LOC115497644																				LOC115490569				LOC115491182						LOC115491548
			LOC115497682																				LOC115490650				LOC115491183						LOC115491573
			LOC115497696																				LOC115490697				LOC115491214						LOC115491583
			LOC115497698																				LOC115490701				LOC115491220						LOC115491599
			LOC115497712																				LOC115490727				LOC115491225						LOC115491612
			LOC115497743																				LOC115490728				LOC115491237						LOC115491620
			LOC115497754																				LOC115490750				LOC115491241						LOC115491650
			LOC115497801																				LOC115490752				LOC115491242						LOC115491654
			LOC115497802																				LOC115490771				LOC115491252						LOC115491676
			LOC115497825																				LOC115490773				LOC115491288						LOC115491692
			LOC115497832																				LOC115490792				LOC115491289						LOC115491712
			LOC115497862																				LOC115490813				LOC115491291						LOC115491714
			LOC115497918																				LOC115490875				LOC115491294						LOC115491769
			LOC115497919																				LOC115490881				LOC115491348						LOC115491782
			LOC115497928																				LOC115490928				LOC115491404						LOC115491788
			LOC115497933																				LOC115490936				LOC115491597						LOC115491977
			LOC115497979																				LOC115490952				LOC115491606						LOC115492049
			LOC115497990																				LOC115490956				LOC115491623						LOC115492083
			LOC115498011																				LOC115490971				LOC115491683						LOC115492108
			LOC115498029																				LOC115490972				LOC115491745						LOC115492169
			LOC115498048																				LOC115490977				LOC115491799						LOC115492180
			LOC115498049																				LOC115490978				LOC115491841						LOC115492192
			LOC115498111																				LOC115490985				LOC115491851						LOC115492201
			LOC115498161																				LOC115491004				LOC115491915						LOC115492322
			LOC115498164																				LOC115491007				LOC115491917						LOC115492334
			LOC115498232																				LOC115491015				LOC115491932						LOC115492342
			LOC115498279																				LOC115491016				LOC115491935						LOC115492383
			LOC115498319																				LOC115491037				LOC115491955						LOC115492386
			LOC115498364																				LOC115491041				LOC115491957						LOC115492389
			LOC115498406																				LOC115491044				LOC115492038						LOC115492399
			LOC115498474																				LOC115491060				LOC115492053						LOC115492405
			LOC115498478																				LOC115491061				LOC115492054						LOC115492410
			LOC115498489																				LOC115491070				LOC115492105						LOC115492453
			LOC115498508																				LOC115491073				LOC115492207						LOC115492484
			LOC115498565																				LOC115491126				LOC115492298						LOC115492496
			LOC115498584																				LOC115491128				LOC115492308						LOC115492525
			LOC116806613																				LOC115491132				LOC115492314						LOC115492551
			LOC116806630																				LOC115491144				LOC115492315						LOC115492576
			LOC116806636																				LOC115491155				LOC115492365						LOC115492592
			LOC116806658																				LOC115491162				LOC115492417						LOC115492594
			LOC116806679																				LOC115491169				LOC115492427						LOC115492610
			LOC116806695																				LOC115491172				LOC115492495						LOC115492620
			LOC116806731																				LOC115491176				LOC115492515						LOC115492685
			LOC116806740																				LOC115491177				LOC115492597						LOC115492695
			LOC116806743																				LOC115491180				LOC115492616						LOC115492712
			LOC116806747																				LOC115491213				LOC115492698						LOC115492733
			LOC116806753																				LOC115491219				LOC115492926						LOC115492776
			LOC116806780																				LOC115491224				LOC115492991						LOC115492817
			LOC116806791																				LOC115491228				LOC115493004						LOC115492854
			LOC116806794																				LOC115491263				LOC115493085						LOC115492923
			LOC116806808																				LOC115491282				LOC115493087						LOC115492946
			LOC116806815																				LOC115491290				LOC115493091						LOC115492965
			LOC116806850																				LOC115491300				LOC115493092						LOC115492979
			LOC116806860																				LOC115491304				LOC115493094						LOC115492993
			LOC116806983																				LOC115491305				LOC115493101						LOC115493062
			LOC116807023																				LOC115491410				LOC115493118						LOC115493103
			LOC116807024																				LOC115491510				LOC115493145						LOC115493106
			LOC116807028																				LOC115491619				LOC115493154						LOC115493124
			LOC116807043																				LOC115491624				LOC115493356						LOC115493143
			LOC116807100																				LOC115491631				LOC115493362						LOC115493148
			LOC116807126																				LOC115491679				LOC115493366						LOC115493161
			LOC116807145																				LOC115491738				LOC115493375						LOC115493162
			LOC116807166																				LOC115491814				LOC115493417						LOC115493173
			LOC116807170																				LOC115491835				LOC115493420						LOC115493180
			LOC116807196																				LOC115491914				LOC115493424						LOC115493185
			LOC116807239																				LOC115491918				LOC115493442						LOC115493202
			LOC116807240																				LOC115492129				LOC115493451						LOC115493205
			LOC116807289																				LOC115492257				LOC115493452						LOC115493213
			LOC116807371																				LOC115492303				LOC115493460						LOC115493297
			LOC116807373																				LOC115492331				LOC115493464						LOC115493341
			LOC116807388																				LOC115492352				LOC115493469						LOC115493346
			LOC116807397																				LOC115492366				LOC115493471						LOC115493360
			LOC116807409																				LOC115492374				LOC115493485						LOC115493389
			LOC116807444																				LOC115492396				LOC115493510						LOC115493397
			LOC116807459																				LOC115492402				LOC115493570						LOC115493410
			LOC116807468																				LOC115492408				LOC115493573						LOC115493428
			LOC116807520																				LOC115492413				LOC115493601						LOC115493429
			LOC116807541																				LOC115492415				LOC115493609						LOC115493430
			LOC116807615																				LOC115492425				LOC115493635						LOC115493431
			LOC116807631																				LOC115492429				LOC115493652						LOC115493434
			LOC116807632																				LOC115492464				LOC115493663						LOC115493454
			LOC116807657																				LOC115492498				LOC115493664						LOC115493455
			LOC116807669																				LOC115492499				LOC115493672						LOC115493458
			LOC116807676																				LOC115492510				LOC115493673						LOC115493474
			LOC116807693																				LOC115492511				LOC115493675						LOC115493479
			LOC116807700																				LOC115492519				LOC115493696						LOC115493486
			LOC116807713																				LOC115492522				LOC115493724						LOC115493487
			LOC116807733																				LOC115492619				LOC115493745						LOC115493489
			LOC116807735																				LOC115492621				LOC115493746						LOC115493506
			LOC116807753																				LOC115492635				LOC115493751						LOC115493519
			LOC116807755																				LOC115492672				LOC115493771						LOC115493552
			LOC116807774																				LOC115492902				LOC115493773						LOC115493553
			LOC116807818																				LOC115492922				LOC115493785						LOC115493554
			LOC116807831																				LOC115493074				LOC115493791						LOC115493559
			LOC116807836																				LOC115493090				LOC115493819						LOC115493560
			LOC116807858																				LOC115493107				LOC115493834						LOC115493618
			LOC116807867																				LOC115493134				LOC115493838						LOC115493619
			LOC116807874																				LOC115493149				LOC115493840						LOC115493620
			LOC116807897																				LOC115493254				LOC115493847						LOC115493631
			LOC116807898																				LOC115493266				LOC115493855						LOC115493636
			LOC116807899																				LOC115493304				LOC115493862						LOC115493657
			LOC116807903																				LOC115493350				LOC115493869						LOC115493670
			LOC116807908																				LOC115493373				LOC115493896						LOC115493676
			LOC116807923																				LOC115493382				LOC115493910						LOC115493702
			LOC116807944																				LOC115493386				LOC115493913						LOC115493705
			LOC116808018																				LOC115493396				LOC115493917						LOC115493718
			LOC116808033																				LOC115493408				LOC115493945						LOC115493725
			LOC116808040																				LOC115493449				LOC115493953						LOC115493735
			LOC116808042																				LOC115493457				LOC115493972						LOC115493740
			LOC116808098																				LOC115493459				LOC115493973						LOC115493744
			LOC116808103																				LOC115493461				LOC115494005						LOC115493749
			LOC116808126																				LOC115493462				LOC115494013						LOC115493775
			LOC116808130																				LOC115493465				LOC115494034						LOC115493789
			LOC116808155																				LOC115493467				LOC115494062						LOC115493812
			LOC116808164																				LOC115493478				LOC115494072						LOC115493816
			LOC116808179																				LOC115493490				LOC115494092						LOC115493826
			LOC116808181																				LOC115493504				LOC115494104						LOC115493833
			LOC116808192																				LOC115493522				LOC115494116						LOC115493835
			LOC116808201																				LOC115493529				LOC115494138						LOC115493859
			LOC116808204																				LOC115493544				LOC115494152						LOC115493871
			LOC116808218																				LOC115493571				LOC115494153						LOC115493903
			LOC116808240																				LOC115493578				LOC115494158						LOC115493932
			LOC116808245																				LOC115493595				LOC115494245						LOC115493933
			LOC116808249																				LOC115493602				LOC115494250						LOC115493934
			LOC116808264																				LOC115493606				LOC115494291						LOC115493966
			LOC116808270																				LOC115493613				LOC115494292						LOC115493976
			LOC116808274																				LOC115493614				LOC115494315						LOC115494006
			LOC116808436																				LOC115493615				LOC115494328						LOC115494036
			LOC116808464																				LOC115493621				LOC115494396						LOC115494071
			LOC116808506																				LOC115493632				LOC115494399						LOC115494074
			LOC116808513																				LOC115493639				LOC115494405						LOC115494079
			LOC116808546																				LOC115493640				LOC115494445						LOC115494107
			LOC116808555																				LOC115493641				LOC115494463						LOC115494110
			LOC116808578																				LOC115493645				LOC115494476						LOC115494115
			LOC116808579																				LOC115493646				LOC115494496						LOC115494157
			LOC116808580																				LOC115493654				LOC115494518						LOC115494161
			LOC116808601																				LOC115493659				LOC115494538						LOC115494279
			LOC116808619																				LOC115493674				LOC115494541						LOC115494282
			LOC116808636																				LOC115493682				LOC115494572						LOC115494290
			LOC116808637																				LOC115493684				LOC115494584						LOC115494306
			LOC116808638																				LOC115493692				LOC115494606						LOC115494343
			LOC116808644																				LOC115493694				LOC115494610						LOC115494372
			LOC116808651																				LOC115493697				LOC115494616						LOC115494380
			LOC116808653																				LOC115493703				LOC115494622						LOC115494427
			LOC116808654																				LOC115493720				LOC115494630						LOC115494430
			LOC116808658																				LOC115493723				LOC115494655						LOC115494444
			LOC116808689																				LOC115493743				LOC115494669						LOC115494448
			LOC116808701																				LOC115493759				LOC115494693						LOC115494466
			LOC116808711																				LOC115493781				LOC115494698						LOC115494472
			LOC116808719																				LOC115493782				LOC115494704						LOC115494494
			LOC116808720																				LOC115493794				LOC115494713						LOC115494498
			LOC116808727																				LOC115493798				LOC115494716						LOC115494515
			LOC116808781																				LOC115493806				LOC115494719						LOC115494531
			LOC116808784																				LOC115493808				LOC115494735						LOC115494536
			LOC116808786																				LOC115493811				LOC115494749						LOC115494545
			LOC116808795																				LOC115493818				LOC115494757						LOC115494555
			LOC116808797																				LOC115493824				LOC115494782						LOC115494614
			LOC116808812																				LOC115493827				LOC115494805						LOC115494618
			LOC116808828																				LOC115493843				LOC115494818						LOC115494682
			LOC116808830																				LOC115493844				LOC115494852						LOC115494683
			LOC116808832																				LOC115493845				LOC115494865						LOC115494737
			LOC116808844																				LOC115493848				LOC115494874						LOC115494750
			LOC116808845																				LOC115493868				LOC115494889						LOC115494752
			LOC116808848																				LOC115493872				LOC115494890						LOC115494793
			LOC116808850																				LOC115493873				LOC115494908						LOC115494819
			LOC116808852																				LOC115493889				LOC115494913						LOC115494830
			LOC116808874																				LOC115493898				LOC115494917						LOC115494834
			LOC116808889																				LOC115493904				LOC115494918						LOC115494840
			LOC116808912																				LOC115493907				LOC115494931						LOC115494850
			LOC116808919																				LOC115493911				LOC115494933						LOC115494853
			LOC116808928																				LOC115493916				LOC115494944						LOC115494867
			LOC116808941																				LOC115493924				LOC115494948						LOC115494950
			LOC116808980																				LOC115493936				LOC115494955						LOC115494951
			LOC116809005																				LOC115493954				LOC115494968						LOC115494956
			LOC116809019																				LOC115493958				LOC115494983						LOC115494964
			LOC116809045																				LOC115493968				LOC115494985						LOC115494974
			LOC116809050																				LOC115493984				LOC115495000						LOC115494999
			LOC116809069																				LOC115493999				LOC115495032						LOC115495023
			LOC116809084																				LOC115494011				LOC115495058						LOC115495026
			LOC116809088																				LOC115494014				LOC115495097						LOC115495036
			LOC116809094																				LOC115494015				LOC115495108						LOC115495041
			LOC116809100																				LOC115494059				LOC115495125						LOC115495044
			LOC116809116																				LOC115494075				LOC115495138						LOC115495046
			LOC116809117																				LOC115494082				LOC115495190						LOC115495051
			LOC116809131																				LOC115494098				LOC115495205						LOC115495053
			LOC116809136																				LOC115494101				LOC115495208						LOC115495065
			LOC116809139																				LOC115494247				LOC115495214						LOC115495070
			LOC116809157																				LOC115494269				LOC115495223						LOC115495091
			LOC116809163																				LOC115494276				LOC115495228						LOC115495098
			LOC116809174																				LOC115494280				LOC115495232						LOC115495101
			LOC116809178																				LOC115494285				LOC115495234						LOC115495119
			LOC116809193																				LOC115494308				LOC115495267						LOC115495130
			LOC116809240																				LOC115494309				LOC115495286						LOC115495131
			LOC116809271																				LOC115494321				LOC115495293						LOC115495139
			LOC116809272																				LOC115494324				LOC115495295						LOC115495140
			LOC116809274																				LOC115494334				LOC115495317						LOC115495185
			LOC116809278																				LOC115494346				LOC115495376						LOC115495186
			LOC116809304																				LOC115494358				LOC115495393						LOC115495189
			LOC116809312																				LOC115494365				LOC115495428						LOC115495191
			LONRF1																				LOC115494369				LOC115495429						LOC115495197
			LOXL4																				LOC115494375				LOC115495434						LOC115495199
			LPIN2																				LOC115494383				LOC115495440						LOC115495202
			LRFN2																				LOC115494384				LOC115495456						LOC115495210
			LRFN5																				LOC115494386				LOC115495471						LOC115495227
			LRIT1																				LOC115494401				LOC115495488						LOC115495235
			LRIT3																				LOC115494412				LOC115495497						LOC115495236
			LRRC17																				LOC115494414				LOC115495502						LOC115495239
			LRRC18																				LOC115494423				LOC115495523						LOC115495253
			LRRC23																				LOC115494434				LOC115495527						LOC115495254
			LRRC28																				LOC115494446				LOC115495532						LOC115495268
			LRRC41																				LOC115494454				LOC115495539						LOC115495272
			LRRC45																				LOC115494460				LOC115495547						LOC115495276
			LRRC4C																				LOC115494467				LOC115495572						LOC115495291
			LRRC52																				LOC115494478				LOC115495594						LOC115495294
			LRRC58																				LOC115494481				LOC115495655						LOC115495297
			LRRC6																				LOC115494483				LOC115495661						LOC115495302
			LRRC70																				LOC115494486				LOC115495663						LOC115495337
			LRRC75B																				LOC115494495				LOC115495665						LOC115495346
			LRRC8A																				LOC115494502				LOC115495688						LOC115495367
			LRRC8B																				LOC115494504				LOC115495695						LOC115495372
			LRRN1																				LOC115494513				LOC115495698						LOC115495387
			LRRN4																				LOC115494516				LOC115495738						LOC115495400
			LRRTM1																				LOC115494517				LOC115495746						LOC115495402
			LRRTM2																				LOC115494522				LOC115495748						LOC115495437
			LRSAM1																				LOC115494532				LOC115495755						LOC115495450
			LURAP1L																				LOC115494544				LOC115495765						LOC115495467
			LUZP2																				LOC115494556				LOC115495769						LOC115495468
			LVRN																				LOC115494557				LOC115495770						LOC115495472
			LY75																				LOC115494560				LOC115495771						LOC115495473
			LYPD1																				LOC115494571				LOC115495777						LOC115495481
			LYPD6B																				LOC115494611				LOC115495790						LOC115495489
			LYSMD4																				LOC115494617				LOC115495801						LOC115495541
			MAB21L1																				LOC115494621				LOC115495829						LOC115495542
			MAEL																				LOC115494623				LOC115495837						LOC115495546
			MAF																				LOC115494646				LOC115495870						LOC115495573
			MAFA																				LOC115494692				LOC115495871						LOC115495577
			MAFG																				LOC115494694				LOC115495932						LOC115495589
			MAFK																				LOC115494696				LOC115495963						LOC115495590
			MAGI1																				LOC115494709				LOC115495971						LOC115495595
			MAGT1																				LOC115494710				LOC115495980						LOC115495602
			MAL2																				LOC115494720				LOC115495995						LOC115495621
			MALRD1																				LOC115494725				LOC115496002						LOC115495650
			MAMDC4																				LOC115494726				LOC115496023						LOC115495673
			MAN1A2																				LOC115494727				LOC115496035						LOC115495682
			MAP1B																				LOC115494740				LOC115496036						LOC115495711
			MAP3K15																				LOC115494741				LOC115496037						LOC115495720
			MAP3K20																				LOC115494755				LOC115496038						LOC115495750
			MAP3K7CL																				LOC115494758				LOC115496049						LOC115495756
			MAP6																				LOC115494811				LOC115496051						LOC115495773
			MAP7D2																				LOC115494881				LOC115496061						LOC115495786
			MAPK11																				LOC115494921				LOC115496065						LOC115495789
			MAPK14																				LOC115494923				LOC115496087						LOC115495805
			MAPK4																				LOC115494927				LOC115496127						LOC115495810
			MAPK6																				LOC115494952				LOC115496136						LOC115495811
			MARCO																				LOC115494966				LOC115496151						LOC115495848
			MARK3																				LOC115494973				LOC115496154						LOC115495858
			MASP1																				LOC115494975				LOC115496160						LOC115495887
			MASTL																				LOC115494991				LOC115496164						LOC115495889
			MATN1																				LOC115494998				LOC115496168						LOC115495895
			MBIP																				LOC115495014				LOC115496192						LOC115495904
			MBNL1																				LOC115495045				LOC115496214						LOC115495919
			MBOAT1																				LOC115495056				LOC115496238						LOC115495938
			MC3R																				LOC115495057				LOC115496257						LOC115495947
			MC5R																				LOC115495067				LOC115496271						LOC115495951
			MCEE																				LOC115495079				LOC115496274						LOC115495966
			MCFD2																				LOC115495081				LOC115496278						LOC115495979
			MCM2																				LOC115495082				LOC115496308						LOC115495982
			MCTP1																				LOC115495104				LOC115496312						LOC115495987
			MCTP2																				LOC115495107				LOC115496319						LOC115495989
			MCU																				LOC115495109				LOC115496343						LOC115496024
			MCUB																				LOC115495110				LOC115496348						LOC115496033
			MDGA1																				LOC115495121				LOC115496372						LOC115496039
			MECOM																				LOC115495124				LOC115496411						LOC115496044
			MEI4																				LOC115495127				LOC115496420						LOC115496046
			MEIS1																				LOC115495137				LOC115496433						LOC115496053
			MEIS2																				LOC115495145				LOC115496441						LOC115496071
			MELTF																				LOC115495181				LOC115496453						LOC115496093
			MET																				LOC115495195				LOC115496461						LOC115496139
			METTL14																				LOC115495198				LOC115496561						LOC115496162
			METTL24																				LOC115495204				LOC115496574						LOC115496174
			MFF																				LOC115495206				LOC115496575						LOC115496186
			MFSD4A																				LOC115495226				LOC115496587						LOC115496213
			MFSD6																				LOC115495233				LOC115496631						LOC115496223
			MGMT																				LOC115495241				LOC115496634						LOC115496224
			MICU1																				LOC115495243				LOC115496636						LOC115496242
			MIGA1																				LOC115495247				LOC115496638						LOC115496243
			MIIP																				LOC115495252				LOC115496657						LOC115496246
			MIR181A-2																				LOC115495258				LOC115496663						LOC115496250
			MIR2131																				LOC115495261				LOC115496670						LOC115496253
			MIR2978																				LOC115495264				LOC115496722						LOC115496254
			MIR2989-2																				LOC115495273				LOC115496737						LOC115496258
			MKRN2																				LOC115495280				LOC115496739						LOC115496269
			MLLT11																				LOC115495315				LOC115496779						LOC115496292
			MLNR																				LOC115495343				LOC115496780						LOC115496344
			MMD2																				LOC115495364				LOC115496783						LOC115496349
			MMP11																				LOC115495377				LOC115496799						LOC115496351
			MMP17																				LOC115495379				LOC115496801						LOC115496364
			MMP9																				LOC115495462				LOC115496804						LOC115496365
			MMRN1																				LOC115495490				LOC115496859						LOC115496385
			MOGAT2																				LOC115495491				LOC115496873						LOC115496389
			MORN3																				LOC115495496				LOC115496887						LOC115496398
			MOV10L1																				LOC115495504				LOC115496891						LOC115496432
			MPL																				LOC115495508				LOC115496893						LOC115496445
			MPP7																				LOC115495512				LOC115496916						LOC115496452
			MPPED1																				LOC115495528				LOC115496928						LOC115496459
			MPZ																				LOC115495529				LOC115496933						LOC115496462
			MPZL1																				LOC115495535				LOC115496947						LOC115496468
			MRAP2																				LOC115495574				LOC115497017						LOC115496473
			MRAS																				LOC115495586				LOC115497018						LOC115496482
			MREG																				LOC115495587				LOC115497034						LOC115496485
			MRGBP																				LOC115495603				LOC115497035						LOC115496557
			MRNIP																				LOC115495625				LOC115497042						LOC115496566
			MSANTD4																				LOC115495628				LOC115497043						LOC115496584
			MSGN1																				LOC115495652				LOC115497066						LOC115496622
			MSI1																				LOC115495690				LOC115497072						LOC115496637
			MSI2																				LOC115495692				LOC115497095						LOC115496662
			MSRB3																				LOC115495694				LOC115497100						LOC115496665
			MTFR1																				LOC115495697				LOC115497107						LOC115496706
			MTHFD1																				LOC115495725				LOC115497108						LOC115496712
			MTMR1																				LOC115495729				LOC115497115						LOC115496728
			MTMR10																				LOC115495744				LOC115497116						LOC115496733
			MUC1																				LOC115495752				LOC115497121						LOC115496754
			MUSK																				LOC115495762				LOC115497122						LOC115496765
			MXD4																				LOC115495776				LOC115497142						LOC115496771
			MYADML2																				LOC115495784				LOC115497147						LOC115496778
			MYB																				LOC115495788				LOC115497161						LOC115496788
			MYBPC3																				LOC115495794				LOC115497185						LOC115496831
			MYBPH																				LOC115495803				LOC115497245						LOC115496843
			MYCL																				LOC115495804				LOC115497258						LOC115496844
			MYH7B																				LOC115495813				LOC115497268						LOC115496849
			MYLK2																				LOC115495822				LOC115497290						LOC115496852
			MYLK3																				LOC115495824				LOC115497341						LOC115496863
			MYO19																				LOC115495826				LOC115497349						LOC115496869
			MYO1A																				LOC115495839				LOC115497358						LOC115496880
			MYO5C																				LOC115495857				LOC115497368						LOC115496886
			MYO7A																				LOC115495859				LOC115497379						LOC115496889
			MYOD1																				LOC115495860				LOC115497392						LOC115496897
			MYOG																				LOC115495862				LOC115497394						LOC115496915
			MYOZ3																				LOC115495863				LOC115497399						LOC115496923
			MYT1L																				LOC115495897				LOC115497404						LOC115496926
			NABP1																				LOC115495905				LOC115497407						LOC115496955
			NADK2																				LOC115495906				LOC115497442						LOC115496957
			NAF1																				LOC115495918				LOC115497538						LOC115496959
			NANOS3																				LOC115495920				LOC115497552						LOC115496967
			NAPEPLD																				LOC115495924				LOC115497554						LOC115496971
			NAPRT																				LOC115495928				LOC115497562						LOC115496990
			NAXD																				LOC115495929				LOC115497564						LOC115496992
			NCBP2																				LOC115495934				LOC115497567						LOC115496993
			NCK2																				LOC115495937				LOC115497582						LOC115496997
			NCOA4																				LOC115495953				LOC115497601						LOC115497036
			NDC80																				LOC115495958				LOC115497613						LOC115497050
			NDFIP1																				LOC115495975				LOC115497630						LOC115497052
			NDNF																				LOC115495992				LOC115497647						LOC115497056
			NDST4																				LOC115496003				LOC115497648						LOC115497062
			NECAB1																				LOC115496015				LOC115497651						LOC115497069
			NEFH																				LOC115496020				LOC115497679						LOC115497085
			NEFL																				LOC115496025				LOC115497681						LOC115497094
			NEFM																				LOC115496032				LOC115497694						LOC115497097
			NELL1																				LOC115496034				LOC115497726						LOC115497140
			NETO1																				LOC115496041				LOC115497748						LOC115497169
			NEUROD1																				LOC115496084				LOC115497751						LOC115497170
			NEUROD2																				LOC115496094				LOC115497766						LOC115497174
			NEUROD6																				LOC115496121				LOC115497779						LOC115497184
			NEXN																				LOC115496126				LOC115497804						LOC115497190
			NFATC2																				LOC115496140				LOC115497816						LOC115497205
			NFIL3																				LOC115496157				LOC115497829						LOC115497210
			NFILZ																				LOC115496173				LOC115497838						LOC115497212
			NGB																				LOC115496184				LOC115497842						LOC115497223
			NHLH2																				LOC115496199				LOC115497846						LOC115497256
			NHLRC4																				LOC115496201				LOC115497881						LOC115497270
			NHSL2																				LOC115496202				LOC115497893						LOC115497288
			NIPAL4																				LOC115496205				LOC115497900						LOC115497289
			NKAIN2																				LOC115496208				LOC115497926						LOC115497297
			NKAIN3																				LOC115496227				LOC115497951						LOC115497306
			NKRF																				LOC115496231				LOC115497952						LOC115497354
			NKX3-2																				LOC115496237				LOC115497957						LOC115497366
			NLGN4X																				LOC115496239				LOC115497968						LOC115497382
			NMB																				LOC115496247				LOC115497994						LOC115497383
			NMBR																				LOC115496260				LOC115498003						LOC115497397
			NME1																				LOC115496261				LOC115498080						LOC115497416
			NMNAT3																				LOC115496268				LOC115498090						LOC115497479
			NMUR2																				LOC115496270				LOC115498095						LOC115497519
			NOBOX																				LOC115496279				LOC115498147						LOC115497532
			NOTUM																				LOC115496281				LOC115498162						LOC115497553
			NOXA1																				LOC115496283				LOC115498182						LOC115497592
			NPAS4																				LOC115496285				LOC115498235						LOC115497596
			NPBWR2																				LOC115496310				LOC115498240						LOC115497603
			NPC1																				LOC115496313				LOC115498245						LOC115497612
			NPNT																				LOC115496314				LOC115498253						LOC115497614
			NPR2																				LOC115496322				LOC115498257						LOC115497618
			NPR3																				LOC115496323				LOC115498267						LOC115497635
			NPS																				LOC115496335				LOC115498270						LOC115497661
			NPTX2																				LOC115496337				LOC115498294						LOC115497666
			NPTXR																				LOC115496340				LOC115498302						LOC115497669
			NPY2R																				LOC115496361				LOC115498304						LOC115497768
			NPY5R																				LOC115496383				LOC115498305						LOC115497772
			NR1D2																				LOC115496401				LOC115498318						LOC115497789
			NR1H4																				LOC115496403				LOC115498355						LOC115497800
			NR2E3																				LOC115496408				LOC115498370						LOC115497810
			NR4A2																				LOC115496413				LOC115498404						LOC115497830
			NR4A3																				LOC115496449				LOC115498426						LOC115497857
			NRG2																				LOC115496454				LOC115498444						LOC115497883
			NRG4																				LOC115496457				LOC115498447						LOC115497905
			NRIP1																				LOC115496458				LOC115498449						LOC115497925
			NRIP3																				LOC115496460				LOC115498459						LOC115497934
			NRN1																				LOC115496464				LOC115498484						LOC115497964
			NRROS																				LOC115496479				LOC115498505						LOC115497970
			NRSN1																				LOC115496484				LOC115498509						LOC115497975
			NRXN3																				LOC115496554				LOC115498593						LOC115497985
			NSG1																				LOC115496563				LOC116806596						LOC115497993
			NT5DC1																				LOC115496565				LOC116806602						LOC115498030
			NTN3																				LOC115496567				LOC116806608						LOC115498033
			NTNG1																				LOC115496570				LOC116806622						LOC115498098
			NTS																				LOC115496578				LOC116806633						LOC115498199
			NTSR1																				LOC115496586				LOC116806650						LOC115498214
			NUAK2																				LOC115496588				LOC116806699						LOC115498218
			NUDT7																				LOC115496629				LOC116806709						LOC115498242
			NUDT9																				LOC115496633				LOC116806734						LOC115498250
			NUP93																				LOC115496649				LOC116806736						LOC115498269
			NWD2																				LOC115496650				LOC116806786						LOC115498303
			NXPH1																				LOC115496667				LOC116806799						LOC115498339
			NXPH2																				LOC115496698				LOC116806806						LOC115498340
			NXPH3																				LOC115496707				LOC116806813						LOC115498346
			NYAP2																				LOC115496716				LOC116806820						LOC115498354
			OCA2																				LOC115496735				LOC116806831						LOC115498367
			OCRL																				LOC115496740				LOC116806836						LOC115498371
			ODC1																				LOC115496741				LOC116806844						LOC115498476
			ODR4																				LOC115496753				LOC116806847						LOC115498480
			OFD1																				LOC115496768				LOC116806862						LOC115498494
			OGDH																				LOC115496789				LOC116806872						LOC115498517
			OLFM3																				LOC115496792				LOC116806873						LOC115498535
			OLIG3																				LOC115496793				LOC116806908						LOC115498542
			OMG																				LOC115496811				LOC116806933						LOC115498546
			OMP																				LOC115496812				LOC116806975						LOC115498559
			ONECUT1																				LOC115496815				LOC116806991						LOC115498586
			ONECUT3																				LOC115496830				LOC116807005						LOC115498598
			OPHN1																				LOC115496872				LOC116807015						LOC115498601
			OPRD1																				LOC115496874				LOC116807018						LOC116806599
			OPRK1																				LOC115496895				LOC116807022						LOC116806624
			OPRL1																				LOC115496914				LOC116807030						LOC116806632
			OPRM1																				LOC115496920				LOC116807034						LOC116806638
			ORC3																				LOC115496930				LOC116807036						LOC116806656
			ORC4																				LOC115496936				LOC116807056						LOC116806661
			ORC5																				LOC115496944				LOC116807094						LOC116806664
			OSBPL8																				LOC115496966				LOC116807098						LOC116806680
			OTOP2																				LOC115496994				LOC116807123						LOC116806684
			OTX1																				LOC115497003				LOC116807136						LOC116806704
			OTX2																				LOC115497009				LOC116807139						LOC116806708
			P2RX3																				LOC115497012				LOC116807150						LOC116806724
			P2RX4																				LOC115497044				LOC116807157						LOC116806725
			P2RX5																				LOC115497045				LOC116807160						LOC116806748
			PACSIN3																				LOC115497051				LOC116807167						LOC116806751
			PAFAH1B2																				LOC115497071				LOC116807176						LOC116806757
			PANX1																				LOC115497076				LOC116807189						LOC116806798
			PAPPA																				LOC115497079				LOC116807207						LOC116806823
			PAPSS1																				LOC115497090				LOC116807235						LOC116806828
			PAQR3																				LOC115497106				LOC116807264						LOC116806830
			PAQR9																				LOC115497112				LOC116807267						LOC116806843
			PARD3																				LOC115497113				LOC116807369						LOC116806893
			PARVB																				LOC115497128				LOC116807378						LOC116806897
			PATJ																				LOC115497141				LOC116807386						LOC116806907
			PAX5																				LOC115497144				LOC116807435						LOC116806909
			PAX6																				LOC115497148				LOC116807454						LOC116806915
			PBX1																				LOC115497166				LOC116807456						LOC116806938
			PCBD1																				LOC115497168				LOC116807458						LOC116806941
			PCCB																				LOC115497176				LOC116807478						LOC116806952
			PCDH11X																				LOC115497203				LOC116807507						LOC116806954
			PCDH17																				LOC115497213				LOC116807517						LOC116806992
			PCDH18																				LOC115497227				LOC116807551						LOC116807001
			PCDH8																				LOC115497230				LOC116807565						LOC116807003
			PCMTD1																				LOC115497235				LOC116807569						LOC116807014
			PCOLCE2																				LOC115497239				LOC116807571						LOC116807016
			PCP2																				LOC115497240				LOC116807580						LOC116807021
			PCSK2																				LOC115497247				LOC116807607						LOC116807026
			PDE11A																				LOC115497248				LOC116807617						LOC116807038
			PDE1A																				LOC115497252				LOC116807644						LOC116807075
			PDE3A																				LOC115497271				LOC116807646						LOC116807090
			PDE3B																				LOC115497273				LOC116807650						LOC116807099
			PDE4B																				LOC115497282				LOC116807654						LOC116807112
			PDE8A																				LOC115497292				LOC116807663						LOC116807118
			PDGFB																				LOC115497294				LOC116807668						LOC116807140
			PDGFD																				LOC115497302				LOC116807685						LOC116807144
			PDK4																				LOC115497319				LOC116807689						LOC116807154
			PDLIM1																				LOC115497327				LOC116807691						LOC116807211
			PDLIM5																				LOC115497329				LOC116807694						LOC116807212
			PDXDC1																				LOC115497335				LOC116807701						LOC116807213
			PDZK1IP1																				LOC115497338				LOC116807703						LOC116807218
			PDZRN3																				LOC115497340				LOC116807709						LOC116807238
			PDZRN4																				LOC115497361				LOC116807710						LOC116807244
			PEAK1																				LOC115497378				LOC116807714						LOC116807254
			PENK																				LOC115497400				LOC116807716						LOC116807255
			PER3																				LOC115497401				LOC116807717						LOC116807259
			PFKFB3																				LOC115497412				LOC116807722						LOC116807265
			PFN2																				LOC115497421				LOC116807724						LOC116807269
			PGAP1																				LOC115497434				LOC116807727						LOC116807273
			PGF																				LOC115497435				LOC116807730						LOC116807376
			PGM2																				LOC115497436				LOC116807731						LOC116807381
			PGR																				LOC115497443				LOC116807738						LOC116807383
			PHACTR3																				LOC115497444				LOC116807778						LOC116807391
			PHETA1																				LOC115497451				LOC116807782						LOC116807392
			PHF12																				LOC115497455				LOC116807783						LOC116807402
			PHF13																				LOC115497456				LOC116807794						LOC116807406
			PHKA2																				LOC115497457				LOC116807799						LOC116807425
			PHLDA2																				LOC115497506				LOC116807800						LOC116807426
			PIANP																				LOC115497533				LOC116807806						LOC116807429
			PIMREG																				LOC115497542				LOC116807811						LOC116807441
			PITX1																				LOC115497549				LOC116807813						LOC116807446
			PIWIL1																				LOC115497558				LOC116807824						LOC116807451
			PIWIL2																				LOC115497561				LOC116807828						LOC116807457
			PKM																				LOC115497563				LOC116807835						LOC116807471
			PKNOX2																				LOC115497566				LOC116807853						LOC116807475
			PLA2G12A																				LOC115497622				LOC116807855						LOC116807504
			PLCB1																				LOC115497642				LOC116807865						LOC116807513
			PLCD3																				LOC115497652				LOC116807879						LOC116807516
			PLCD4																				LOC115497671				LOC116807880						LOC116807524
			PLCH2																				LOC115497674				LOC116807885						LOC116807536
			PLCXD3																				LOC115497683				LOC116807902						LOC116807549
			PLEKHA3																				LOC115497718				LOC116807909						LOC116807550
			PLEKHA7																				LOC115497775				LOC116807946						LOC116807564
			PLK2																				LOC115497782				LOC116807960						LOC116807578
			PLK5																				LOC115497794				LOC116807961						LOC116807591
			PLOD1																				LOC115497798				LOC116808020						LOC116807594
			PLPPR1																				LOC115497803				LOC116808028						LOC116807609
			PLPPR4																				LOC115497806				LOC116808051						LOC116807642
			PLSCR5																				LOC115497824				LOC116808061						LOC116807643
			PLVAP																				LOC115497836				LOC116808072						LOC116807651
			PLXNA2																				LOC115497837				LOC116808083						LOC116807652
			PLXNA4																				LOC115497840				LOC116808092						LOC116807658
			PLXNC1																				LOC115497864				LOC116808094						LOC116807661
			PM20D2																				LOC115497868				LOC116808095						LOC116807665
			PMAIP1																				LOC115497903				LOC116808102						LOC116807667
			PMF1																				LOC115497906				LOC116808104						LOC116807678
			PNPLA1																				LOC115497911				LOC116808116						LOC116807682
			PNPO																				LOC115497913				LOC116808129						LOC116807687
			PNRC2																				LOC115497935				LOC116808150						LOC116807719
			PODXL																				LOC115497956				LOC116808152						LOC116807732
			POGLUT2																				LOC115497967				LOC116808162						LOC116807737
			POLA1																				LOC115497987				LOC116808166						LOC116807754
			POLB																				LOC115498026				LOC116808174						LOC116807779
			POLD3																				LOC115498054				LOC116808176						LOC116807781
			POLDIP3																				LOC115498075				LOC116808177						LOC116807791
			POMGNT2																				LOC115498109				LOC116808178						LOC116807802
			POU2F3																				LOC115498124				LOC116808183						LOC116807825
			POU4F3																				LOC115498177				LOC116808199						LOC116807859
			POU6F2																				LOC115498215				LOC116808211						LOC116807877
			PPM1F																				LOC115498220				LOC116808215						LOC116807881
			PPP1R3D																				LOC115498224				LOC116808217						LOC116807907
			PPP1R7																				LOC115498225				LOC116808223						LOC116807924
			PPP3CB																				LOC115498236				LOC116808229						LOC116807926
			PPP4R3A																				LOC115498258				LOC116808232						LOC116807940
			PPTC7																				LOC115498264				LOC116808233						LOC116808069
			PRAM1																				LOC115498265				LOC116808234						LOC116808100
			PRDM8																				LOC115498272				LOC116808236						LOC116808109
			PREP																				LOC115498273				LOC116808241						LOC116808118
			PREX1																				LOC115498278				LOC116808247						LOC116808125
			PRICKLE2																				LOC115498300				LOC116808257						LOC116808158
			PRKAR1B																				LOC115498301				LOC116808258						LOC116808200
			PRKCD																				LOC115498337				LOC116808262						LOC116808208
			PRKCE																				LOC115498347				LOC116808266						LOC116808220
			PRNP																				LOC115498350				LOC116808271						LOC116808224
			PROCA1																				LOC115498359				LOC116808420						LOC116808243
			PROKR1																				LOC115498372				LOC116808422						LOC116808246
			PROM1																				LOC115498416				LOC116808425						LOC116808253
			PROSER2																				LOC115498479				LOC116808426						LOC116808268
			PROX1																				LOC115498501				LOC116808428						LOC116808272
			PRPH																				LOC115498515				LOC116808429						LOC116808427
			PRPS1																				LOC115498543				LOC116808431						LOC116808447
			PRPS2																				LOC115498544				LOC116808433						LOC116808451
			PRR5																				LOC115498554				LOC116808439						LOC116808463
			PRSS12																				LOC115498569				LOC116808443						LOC116808470
			PRSS2																				LOC115498571				LOC116808445						LOC116808476
			PRXL2A																				LOC116806597				LOC116808446						LOC116808478
			PSTPIP1																				LOC116806620				LOC116808455						LOC116808483
			PTCD3																				LOC116806639				LOC116808489						LOC116808488
			PTEN																				LOC116806648				LOC116808512						LOC116808492
			PTER																				LOC116806668				LOC116808517						LOC116808497
			PTGFRN																				LOC116806669				LOC116808527						LOC116808509
			PTN																				LOC116806682				LOC116808533						LOC116808511
			PTP4A3																				LOC116806722				LOC116808536						LOC116808523
			PTPRN																				LOC116806732				LOC116808538						LOC116808532
			PTPRO																				LOC116806733				LOC116808551						LOC116808534
			PTPRQ																				LOC116806735				LOC116808563						LOC116808540
			PTPRU																				LOC116806737				LOC116808568						LOC116808550
			PTX3																				LOC116806742				LOC116808571						LOC116808552
			PWWP3A																				LOC116806756				LOC116808585						LOC116808592
			PXK																				LOC116806774				LOC116808591						LOC116808593
			PXYLP1																				LOC116806817				LOC116808614						LOC116808602
			PYGL																				LOC116806839				LOC116808618						LOC116808609
			QPCT																				LOC116806845				LOC116808622						LOC116808624
			QSOX1																				LOC116806846				LOC116808635						LOC116808627
			RAB17																				LOC116806849				LOC116808646						LOC116808650
			RAB25																				LOC116806855				LOC116808649						LOC116808664
			RAB35																				LOC116806885				LOC116808657						LOC116808668
			RAB36																				LOC116806913				LOC116808659						LOC116808670
			RAB39A																				LOC116806921				LOC116808663						LOC116808678
			RAB3B																				LOC116806935				LOC116808665						LOC116808683
			RAB3IP																				LOC116806937				LOC116808667						LOC116808698
			RAB4A																				LOC116806942				LOC116808676						LOC116808702
			RAB6A																				LOC116807002				LOC116808679						LOC116808703
			RABGGTB																				LOC116807008				LOC116808680						LOC116808708
			RADIL																				LOC116807010				LOC116808692						LOC116808713
			RANGAP1																				LOC116807017				LOC116808704						LOC116808716
			RAP2A																				LOC116807025				LOC116808722						LOC116808718
			RAP2B																				LOC116807027				LOC116808723						LOC116808725
			RASAL1																				LOC116807029				LOC116808726						LOC116808789
			RASEF																				LOC116807031				LOC116808728						LOC116808791
			RASGEF1B																				LOC116807040				LOC116808779						LOC116808801
			RASGEF1C																				LOC116807044				LOC116808782						LOC116808811
			RAX																				LOC116807058				LOC116808793						LOC116808814
			RBBP8																				LOC116807079				LOC116808807						LOC116808824
			RBM24																				LOC116807080				LOC116808809						LOC116808838
			RBM46																				LOC116807089				LOC116808813						LOC116808861
			RBP1																				LOC116807124				LOC116808820						LOC116808869
			REELD1																				LOC116807135				LOC116808834						LOC116808883
			REL																				LOC116807143				LOC116808847						LOC116808895
			RELT																				LOC116807152				LOC116808859						LOC116808897
			REM1																				LOC116807162				LOC116808872						LOC116808914
			REXO1																				LOC116807181				LOC116808876						LOC116808915
			REXO4																				LOC116807183				LOC116808890						LOC116808931
			RFLNA																				LOC116807219				LOC116808898						LOC116808939
			RFTN1																				LOC116807225				LOC116808908						LOC116808942
			RFX6																				LOC116807228				LOC116808926						LOC116808950
			RFX7																				LOC116807241				LOC116808934						LOC116808960
			RGL1																				LOC116807243				LOC116808951						LOC116808966
			RGR																				LOC116807246				LOC116808957						LOC116808973
			RGS20																				LOC116807251				LOC116808958						LOC116808984
			RGS5																				LOC116807379				LOC116808970						LOC116808991
			RGS9																				LOC116807393				LOC116808975						LOC116809020
			RHBDD1																				LOC116807405				LOC116808983						LOC116809037
			RHBDD2																				LOC116807408				LOC116809001						LOC116809038
			RHCG																				LOC116807421				LOC116809002						LOC116809047
			RHOBTB1																				LOC116807440				LOC116809015						LOC116809057
			RHOD																				LOC116807443				LOC116809022						LOC116809060
			RHOQ																				LOC116807448				LOC116809024						LOC116809062
			RIBC2																				LOC116807450				LOC116809027						LOC116809063
			RILP																				LOC116807476				LOC116809029						LOC116809071
			RIMS1																				LOC116807477				LOC116809040						LOC116809074
			RIMS2																				LOC116807501				LOC116809049						LOC116809075
			RIOK2																				LOC116807539				LOC116809053						LOC116809082
			RIPK2																				LOC116807540				LOC116809055						LOC116809091
			RIT2																				LOC116807542				LOC116809056						LOC116809132
			RLBP1																				LOC116807553				LOC116809059						LOC116809134
			RNASEH2B																				LOC116807560				LOC116809065						LOC116809137
			RNF11																				LOC116807566				LOC116809083						LOC116809150
			RNF128																				LOC116807568				LOC116809085						LOC116809170
			RNF149																				LOC116807586				LOC116809126						LOC116809171
			RNF20																				LOC116807587				LOC116809143						LOC116809173
			ROBO3																				LOC116807608				LOC116809158						LOC116809176
			ROR1																				LOC116807618				LOC116809166						LOC116809182
			RPA2																				LOC116807619				LOC116809177						LOC116809199
			RPGR																				LOC116807620				LOC116809184						LOC116809207
			RPRML																				LOC116807647				LOC116809186						LOC116809213
			RPS6KA1																				LOC116807648				LOC116809188						LOC116809214
			RPS6KA2																				LOC116807659				LOC116809192						LOC116809224
			RRAD																				LOC116807677				LOC116809202						LOC116809228
			RRAGD																				LOC116807680				LOC116809230						LOC116809231
			RRH																				LOC116807688				LOC116809233						LOC116809245
			RSBN1L																				LOC116807698				LOC116809238						LOC116809255
			RSPH3																				LOC116807712				LOC116809242						LOC116809266
			RSPH4A																				LOC116807718				LOC116809243						LOC116809289
			RSPO1																				LOC116807721				LOC116809244						LOC116809293
			RSPO3																				LOC116807728				LOC116809252						LOC116809294
			RSRC1																				LOC116807734				LOC116809256						LOC116809303
			RSU1																				LOC116807742				LOC116809292						LOC116809314
			RTF1																				LOC116807743				LOC116809308						LOC116809333
			RTTN																				LOC116807749				LOC116809311						LOC116809335
			RUNX1																				LOC116807750				LOC116809315						LOC116809336
			RUNX1T1																				LOC116807751				LOC116809317						LONRF2
			RWDD2B																				LOC116807752				LOC116809318						LOXL3
			RXFP3																				LOC116807763				LOC116809332						LPAR3
			RYR2																				LOC116807769				LOC116809334						LRFN1
			S100A10																				LOC116807773				LPAR2						LRP2BP
			SAAL1																				LOC116807780				LPCAT1						LRPPRC
			SARDH																				LOC116807787				LPCAT2						LRR1
			SART3																				LOC116807793				LPGAT1						LRRC2
[truncated: 1,418 more rows]

## Sheet: c_HUB_Gens
OT Salmon	OT Thistle1	OT Lightyellow
SYCE3	CAPSL	ISL1
DEPDC4	LOC100232083	CARTPT
LAMB4	CCDC170	SLC17A8
TCP11L2	CCDC166	RET
HELB	LRRC43	HMX2
C1AH12orf73	MLPH
COG5	LOC105760877
LOC115493432	CFAP47
SULT4A1	FOXJ1
STAB2	LOC115496080
HMGA2
RIC8B
HAL
MED21
CENPM
ASZ1
ZCRB1
VWF
PHETA2
LOC116807087
TPRKB
LOC115491386
TOMM22
IL2RB
RECQL
PVALB
ADCK2
SOCS2
CHPT1
GPR37
LOC116807729
TTC26
TSPO
LOC115490906
SLC25A3
VT1
TWF1
DBX2
LOC116807723
ADSL

## Sheet: d_GO_OT_Salmon
source	term_name	term_id	adjusted_p_value	negative_log10_of_adjusted_p_value	term_size	query_size	intersection_size	effective_domain_size	intersections
GO:CC	protein-DNA complex	GO:0032993	0.0147105	1.83237	81	166	7	12419	HELB,LOC100218635,LOC100218691,LOC100220543,LOC100221944,LOC100224417,NFYB
GO:CC	nucleosome	GO:0000786	0.0147105	1.83237	33	166	5	12419	LOC100218635,LOC100218691,LOC100220543,LOC100221944,LOC100224417
GO:CC	DNA packaging complex	GO:0044815	0.0154272	1.81171	39	166	5	12419	LOC100218635,LOC100218691,LOC100220543,LOC100221944,LOC100224417
KEGG	Arachidonic acid metabolism	KEGG:00590	0.130088	0.885763	19	166	3	12419	LTA4H,PLA2G6,TBXAS1
GO:MF	pyridoxal phosphatase activity	GO:0033883	0.181602	0.74088	1	166	1	12419	PDXP
GO:MF	thromboxane-A synthase activity	GO:0004796	0.181602	0.74088	1	166	1	12419	TBXAS1
GO:MF	ribitol beta-1,4-xylosyltransferase activity	GO:0120053	0.181602	0.74088	1	166	1	12419	RXYLT1
GO:MF	metalloaminopeptidase activity	GO:0070006	0.181602	0.74088	14	166	3	12419	LTA4H,METAP2,XPNPEP3
GO:MF	hexosaminidase activity	GO:0015929	0.181602	0.74088	12	166	2	12419	NAGA,SPAM1
GO:MF	aminopeptidase activity	GO:0004177	0.181602	0.74088	25	166	3	12419	LTA4H,METAP2,XPNPEP3
GO:MF	diacylglycerol cholinephosphotransferase activity	GO:0004142	0.181602	0.74088	1	166	1	12419	CHPT1
GO:MF	hydroperoxy icosatetraenoate dehydratase activity	GO:0106256	0.181602	0.74088	1	166	1	12419	TBXAS1
GO:MF	protein heterodimerization activity	GO:0046982	0.181602	0.74088	149	166	7	12419	FBXO7,LOC100218635,LOC100218691,LOC100220543,LOC100221944,LOC100224417,NFYB
GO:MF	protein dimerization activity	GO:0046983	0.181602	0.74088	604	166	16	12419	APPL2,ASCL4,FBXO7,LOC100218635,LOC100218691,LOC100220543,LOC100221944,LOC100224417,NAGA,NFYB,PDXP,PHETA2,SREBF2,ST13,XPNPEP3,YARS2
GO:MF	N6-(1,2-dicarboxyethyl)AMP AMP-lyase (fumarate-forming) activity	GO:0004018	0.181602	0.74088	1	166	1	12419	ADSL
GO:MF	carbon-nitrogen lyase activity	GO:0016840	0.181602	0.74088	11	166	2	12419	ADSL,HAL
GO:MF	box C/D RNA binding	GO:0034512	0.181602	0.74088	1	166	1	12419	SNU13
GO:MF	melanin-concentrating hormone activity	GO:0030354	0.181602	0.74088	1	166	1	12419	PMCH
GO:MF	acetylation-dependent protein binding	GO:0140033	0.181602	0.74088	11	166	2	12419	TRIM24,YEATS4
GO:MF	metalloexopeptidase activity	GO:0008235	0.181602	0.74088	38	166	4	12419	CPM,LTA4H,METAP2,XPNPEP3
GO:MF	exopeptidase activity	GO:0008238	0.181602	0.74088	63	166	4	12419	CPM,LTA4H,METAP2,XPNPEP3
GO:MF	alpha-N-acetylgalactosaminidase activity	GO:0008456	0.181602	0.74088	1	166	1	12419	NAGA
GO:MF	myosin VI light chain binding	GO:0070856	0.181602	0.74088	1	166	1	12419	IQGAP3
GO:MF	N-acylneuraminate cytidylyltransferase activity	GO:0008781	0.181602	0.74088	1	166	1	12419	CMAS
GO:MF	histidine ammonia-lyase activity	GO:0004397	0.181602	0.74088	1	166	1	12419	HAL
GO:MF	xylosyltransferase activity	GO:0042285	0.181602	0.74088	8	166	2	12419	GXYLT1,RXYLT1
GO:MF	glycine C-acetyltransferase activity	GO:0008890	0.181602	0.74088	1	166	1	12419	GCAT
GO:MF	(S)-2-(5-amino-1-(5-phospho-D-ribosyl)imidazole-4-carboxamido)succinate AMP-lyase (fumarate-forming) activity	GO:0070626	0.181602	0.74088	1	166	1	12419	ADSL
GO:MF	lysine-acetylated histone binding	GO:0070577	0.181602	0.74088	11	166	2	12419	TRIM24,YEATS4
GO:MF	phenylalanine 4-monooxygenase activity	GO:0004505	0.181602	0.74088	1	166	1	12419	PAH
GO:MF	UDP-xylosyltransferase activity	GO:0035252	0.181602	0.74088	7	166	2	12419	GXYLT1,RXYLT1
GO:MF	leukotriene-A4 hydrolase activity	GO:0004463	0.181602	0.74088	1	166	1	12419	LTA4H
GO:MF	phytanoyl-CoA dioxygenase activity	GO:0048244	0.181602	0.74088	1	166	1	12419	PHYH
GO:MF	DNA binding	GO:0003677	0.204821	0.688625	1074	166	23	12419	CREB3L2,DBX2,DMC1,ELK3,HMGA2,LOC100218635,LOC100218691,LOC100220543,LOC100221944,LOC100224417,MCM10,MCM5,MTERF2,NFYB,POLR3B,POLR3H,PRDM4,SREBF2,TEF,THAP5,TRIM24,WEE2,ZNF277
GO:MF	ADP binding	GO:0043531	0.204821	0.688625	15	166	2	12419	APAF1,MIEF1
GO:MF	actin monomer binding	GO:0003785	0.204821	0.688625	15	166	2	12419	LMOD2,TWF1
GO:MF	U4atac snRNA binding	GO:0030622	0.232509	0.63356	2	166	1	12419	SNU13
GO:MF	epoxide hydrolase activity	GO:0004301	0.232509	0.63356	2	166	1	12419	LTA4H
GO:MF	tyrosine-tRNA ligase activity	GO:0004831	0.232509	0.63356	2	166	1	12419	YARS2
GO:MF	KDEL sequence binding	GO:0005046	0.232509	0.63356	2	166	1	12419	KDELR3
GO:MF	prosaposin receptor activity	GO:0036505	0.232509	0.63356	2	166	1	12419	GPR37
GO:MF	DNA strand exchange activity	GO:0000150	0.232509	0.63356	2	166	1	12419	DMC1
GO:MF	myosin VI binding	GO:0070853	0.232509	0.63356	2	166	1	12419	IQGAP3
GO:MF	H4K20me3 modified histone binding	GO:1990889	0.232509	0.63356	2	166	1	12419	TTLL12
GO:MF	phosphatidylinositol binding	GO:0035091	0.232509	0.63356	159	166	6	12419	APPL2,ITPR2,LOC100224455,NCF4,PHLDA1,TWF1
GO:MF	alpha-L-arabinofuranosidase activity	GO:0046556	0.232509	0.63356	2	166	1	12419	OTOGL
GO:MF	DNA helicase activity	GO:0003678	0.232509	0.63356	47	166	3	12419	HELB,MCM5,RECQL
GO:MF	hydrolase activity, acting on glycosyl bonds	GO:0016798	0.232509	0.63356	82	166	4	12419	LOC100222446,NAGA,OTOGL,SPAM1
GO:MF	tyrosine binding	GO:0072545	0.232509	0.63356	2	166	1	12419	YARS2
GO:MF	Rho GDP-dissociation inhibitor activity	GO:0005094	0.23326	0.63216	3	166	1	12419	ERP27
GO:MF	tRNA dihydrouridine synthase activity	GO:0017150	0.23326	0.63216	3	166	1	12419	DUS4L
GO:MF	thiosulfate sulfurtransferase activity	GO:0004792	0.23326	0.63216	3	166	1	12419	LOC105758589
GO:MF	phosphatidylinositol phosphate binding	GO:1901981	0.23326	0.63216	91	166	4	12419	LOC100224455,NCF4,PHLDA1,TWF1
GO:MF	ribonucleoside binding	GO:0032549	0.23326	0.63216	3	166	1	12419	POLR3B
GO:MF	oxidoreductase activity, acting on paired donors, with incorporation or reduction of molecular oxygen	GO:0016705	0.23326	0.63216	96	166	4	12419	LOC100222415,PAH,PHYH,TBXAS1
GO:MF	ER retention sequence binding	GO:0046923	0.23326	0.63216	3	166	1	12419	KDELR3
GO:MF	superoxide-generating NADPH oxidase activator activity	GO:0016176	0.23326	0.63216	3	166	1	12419	NCF4
GO:MF	5'-3' RNA polymerase activity	GO:0034062	0.23326	0.63216	23	166	2	12419	POLR3B,POLR3H
GO:MF	estrogen response element binding	GO:0034056	0.23326	0.63216	3	166	1	12419	TRIM24
GO:MF	inositol 1,4,5-trisphosphate-sensitive calcium-release channel activity	GO:0005220	0.23326	0.63216	3	166	1	12419	ITPR2
GO:MF	membrane curvature sensor activity	GO:0140090	0.23326	0.63216	3	166	1	12419	PICK1
GO:MF	propionate-CoA ligase activity	GO:0050218	0.23326	0.63216	3	166	1	12419	ACSS3
GO:MF	ammonia-lyase activity	GO:0016841	0.23326	0.63216	3	166	1	12419	HAL
GO:MF	RNA polymerase activity	GO:0097747	0.23326	0.63216	23	166	2	12419	POLR3B,POLR3H
GO:MF	DNA-directed 5'-3' RNA polymerase activity	GO:0003899	0.23326	0.63216	21	166	2	12419	POLR3B,POLR3H
GO:MF	ether hydrolase activity	GO:0016803	0.23326	0.63216	3	166	1	12419	LTA4H
GO:MF	acetate-CoA ligase activity	GO:0003987	0.23326	0.63216	3	166	1	12419	ACSS3
GO:MF	monooxygenase activity	GO:0004497	0.23326	0.63216	51	166	3	12419	LOC100222415,PAH,TBXAS1
GO:MF	U4 snRNA binding	GO:0030621	0.23326	0.63216	3	166	1	12419	SNU13
GO:MF	intraciliary transport particle B binding	GO:0120170	0.23326	0.63216	3	166	1	12419	TTC26
GO:MF	tubulin-glutamic acid ligase activity	GO:0070740	0.23326	0.63216	3	166	1	12419	TTLL1
GO:MF	iron ion binding	GO:0005506	0.233871	0.631023	97	166	4	12419	LOC100222415,PAH,PHYH,TBXAS1
GO:MF	transferase activity, transferring sulphur-containing groups	GO:0016782	0.233871	0.631023	57	166	3	12419	LOC100228825,LOC105758589,SULT4A1
GO:MF	phospholipid binding	GO:0005543	0.242661	0.615001	241	166	7	12419	APPL2,ITPR2,LOC100224455,MICALL1,NCF4,PHLDA1,TWF1
GO:CC	early phagosome membrane	GO:0036186	0.25753	0.589172	1	166	1	12419	APPL2
GO:CC	outer mitochondrial membrane protein complex	GO:0098799	0.25753	0.589172	10	166	2	12419	SAMM50,TOMM22
GO:CC	classical Lewy body	GO:0097414	0.25753	0.589172	1	166	1	12419	FBXO7
GO:CC	glial cytoplasmic inclusion	GO:0097409	0.25753	0.589172	1	166	1	12419	FBXO7
GO:CC	Lewy body corona	GO:1990038	0.25753	0.589172	1	166	1	12419	FBXO7
GO:CC	dense fibrillar component	GO:0001651	0.25753	0.589172	1	166	1	12419	SNU13
GO:CC	Golgi-associated vesicle	GO:0005798	0.25753	0.589172	36	166	3	12419	CLRN1,KDELR3,MAP6D1
GO:CC	mitochondrial outer membrane translocase complex	GO:0005742	0.25753	0.589172	9	166	2	12419	SAMM50,TOMM22
GO:CC	Lewy neurite	GO:0097462	0.25753	0.589172	1	166	1	12419	FBXO7
GO:CC	intraciliary transport particle B	GO:0030992	0.25753	0.589172	8	166	2	12419	IFT27,TTC26
GO:CC	U4atac snRNP	GO:0005690	0.25753	0.589172	1	166	1	12419	SNU13
GO:CC	RNA polymerase III complex	GO:0005666	0.25753	0.589172	9	166	2	12419	POLR3B,POLR3H
GO:MF	C-acetyltransferase activity	GO:0016453	0.264739	0.577183	4	166	1	12419	GCAT
GO:MF	annealing helicase activity	GO:0036310	0.264739	0.577183	4	166	1	12419	RECQL
GO:MF	protein-glutamic acid ligase activity	GO:0070739	0.264739	0.577183	4	166	1	12419	TTLL1
GO:MF	CDP-alcohol phosphatidyltransferase activity	GO:0017169	0.264739	0.577183	4	166	1	12419	CHPT1
GO:MF	immunoglobulin binding	GO:0019865	0.264739	0.577183	4	166	1	12419	VWF
GO:MF	purine-rich negative regulatory element binding	GO:0032422	0.264739	0.577183	4	166	1	12419	ELK3
GO:MF	myosin light chain binding	GO:0032027	0.264739	0.577183	4	166	1	12419	IQGAP3
GO:MF	palmitoyl-CoA hydrolase activity	GO:0016290	0.264739	0.577183	4	166	1	12419	PLA2G6
GO:MF	hydrolase activity, hydrolyzing O-glycosyl compounds	GO:0004553	0.266258	0.574698	64	166	3	12419	NAGA,OTOGL,SPAM1
GO:MF	helicase activity	GO:0004386	0.266258	0.574698	106	166	4	12419	DMC1,HELB,MCM5,RECQL
GO:CC	intraciliary transport particle	GO:0030990	0.282799	0.548522	15	166	2	12419	IFT27,TTC26
GO:CC	ruffle membrane	GO:0032587	0.282799	0.548522	40	166	3	12419	APPL2,PDXP,TWF1
GO:MF	neuropeptide binding	GO:0042923	0.294732	0.530573	5	166	1	12419	GPR37
GO:MF	calcium-independent phospholipase A2 activity	GO:0047499	0.294732	0.530573	5	166	1	12419	PLA2G6
GO:MF	G protein-coupled acetylcholine receptor activity	GO:0016907	0.294732	0.530573	5	166	1	12419	CHRM2
GO:MF	U3 snoRNA binding	GO:0034511	0.294732	0.530573	5	166	1	12419	SNU13
GO:MF	low-density lipoprotein particle receptor activity	GO:0005041	0.294732	0.530573	5	166	1	12419	STAB2
GO:MF	vasopressin receptor activity	GO:0005000	0.294732	0.530573	5	166	1	12419	VT1
GO:MF	somatostatin receptor activity	GO:0004994	0.294732	0.530573	5	166	1	12419	SSTR3
GO:MF	hyalurononglucosaminidase activity	GO:0004415	0.331099	0.480043	7	166	1	12419	SPAM1
GO:MF	acyl-CoA hydrolase activity	GO:0047617	0.331099	0.480043	7	166	1	12419	PLA2G6
GO:MF	metallopeptidase activity	GO:0008237	0.331099	0.480043	126	166	4	12419	CPM,LTA4H,METAP2,XPNPEP3
GO:MF	neuropeptide receptor activity	GO:0008188	0.331099	0.480043	36	166	2	12419	GPR37,SSTR3
GO:MF	oxidoreductase activity, acting on paired donors, with incorporation or reduction of molecular oxygen, reduced pteridine as one donor, and incorporation of one atom of oxygen	GO:0016714	0.331099	0.480043	6	166	1	12419	PAH
GO:MF	G protein-coupled neurotransmitter receptor activity	GO:0099528	0.331099	0.480043	7	166	1	12419	CHRM2
GO:MF	ATPase, acting on DNA	GO:0008094	0.331099	0.480043	126	166	4	12419	DMC1,HELB,MCM5,RECQL
GO:MF	calcium-activated potassium channel activity	GO:0015269	0.331099	0.480043	7	166	1	12419	KCNMB4
GO:MF	5'-3' DNA helicase activity	GO:0043139	0.331099	0.480043	6	166	1	12419	HELB
GO:MF	annealing activity	GO:0097617	0.331099	0.480043	7	166	1	12419	RECQL
GO:MF	superoxide-generating NAD(P)H oxidase activity	GO:0016175	0.331099	0.480043	7	166	1	12419	NCF4
GO:MF	lyase activity	GO:0016829	0.331099	0.480043	125	166	4	12419	ADSL,HAL,LOC100222446,TBXAS1
GO:MF	DNA replication origin binding	GO:0003688	0.331099	0.480043	7	166	1	12419	MCM5
GO:MF	hydrolase activity, acting on ether bonds	GO:0016801	0.331099	0.480043	6	166	1	12419	LTA4H
GO:MF	G protein-coupled receptor activity	GO:0004930	0.331099	0.480043	285	166	7	12419	CELSR1,CHRM2,GPR37,GPR85,LGR5,SSTR3,VT1
GO:MF	cytidylyltransferase activity	GO:0070567	0.331099	0.480043	7	166	1	12419	CMAS
GO:MF	histone methyltransferase binding	GO:1990226	0.331099	0.480043	7	166	1	12419	PRDM4
GO:MF	tropomyosin binding	GO:0005523	0.331099	0.480043	7	166	1	12419	LMOD2
GO:MF	amidine-lyase activity	GO:0016842	0.331099	0.480043	7	166	1	12419	ADSL
GO:MF	nucleoside binding	GO:0001882	0.331099	0.480043	6	166	1	12419	POLR3B
GO:MF	nucleic acid binding	GO:0003676	0.341886	0.466118	1761	166	30	12419	CREB3L2,DBX2,DMC1,ELK3,HMGA2,LOC100218635,LOC100218691,LOC100220543,LOC100221944,LOC100224417,LOC105758589,LOC105759175,MCM10,MCM5,MTERF2,NFYB,POLR3B,POLR3H,PRDM4,PUS7,RECQL,SNU13,SREBF2,TEF,THAP5,TRIM24,WEE2,YARS2,ZCRB1,ZNF277
GO:MF	sulfurtransferase activity	GO:0016783	0.344763	0.462479	8	166	1	12419	LOC105758589
GO:MF	C-acyltransferase activity	GO:0016408	0.344763	0.462479	8	166	1	12419	GCAT
GO:MF	cGMP binding	GO:0030553	0.344763	0.462479	8	166	1	12419	PDE6H
GO:MF	lipoprotein particle receptor activity	GO:0030228	0.344763	0.462479	8	166	1	12419	STAB2
GO:MF	nucleotidyltransferase activity	GO:0016779	0.344763	0.462479	83	166	3	12419	CMAS,POLR3B,POLR3H
GO:MF	ubiquitin ligase-substrate adaptor activity	GO:1990756	0.344763	0.462479	8	166	1	12419	FBXO7
GO:MF	neurotrophin receptor binding	GO:0005165	0.344763	0.462479	8	166	1	12419	NTF3
GO:MF	protein C-terminus binding	GO:0008022	0.344763	0.462479	84	166	3	12419	PICK1,SREBF2,YEATS4
GO:MF	5S rRNA binding	GO:0008097	0.344763	0.462479	8	166	1	12419	LOC105758589
GO:CC	Weibel-Palade body	GO:0033093	0.344983	0.462203	3	166	1	12419	VWF
GO:CC	Lewy body core	GO:1990037	0.344983	0.462203	2	166	1	12419	FBXO7
GO:CC	Dsl1/NZR complex	GO:0070939	0.344983	0.462203	3	166	1	12419	RINT1
GO:CC	EKC/KEOPS complex	GO:0000408	0.344983	0.462203	3	166	1	12419	TPRKB
GO:CC	apoptosome	GO:0043293	0.344983	0.462203	2	166	1	12419	APAF1
GO:CC	intracellular anatomical structure	GO:0005622	0.344983	0.462203	7179	166	109	12419	ACSS3,ADSL,APAF1,APPL2,ASZ1,BRAF,C1AH12ORF66,C1AH12ORF73,CBY1,CCDC107,CCT2,CENPM,CLRN1,COG5,CREB3L2,DMC1,ELK3,ERP27,FBXO7,FOXRED2,GCAT,GPR37,GPR85,GRAP2,GTSE1,HAL,HELB,HMGA2,IFT27,INTS13,IQGAP3,ITPR2,KDELR3,LGR5,LMOD2,LOC100218635,LOC100218691,LOC100220543,LOC100221944,LOC100224417,LOC100225408,LOC100229115,LOC105758589,LTA4H,MAP6D1,MCM10,MCM5,MED21,METAP2,MICALL1,MIEF1,MTERF2,NAGA,NCF4,NDUFA12,N…
GO:CC	KICSTOR complex	GO:0140007	0.344983	0.462203	3	166	1	12419	C1AH12ORF66
GO:CC	Lewy body	GO:0097413	0.344983	0.462203	3	166	1	12419	FBXO7
GO:CC	actin cap	GO:0030478	0.344983	0.462203	3	166	1	12419	WASL
GO:CC	clathrin-coated vesicle	GO:0030136	0.344983	0.462203	57	166	3	12419	CLRN1,PHETA2,VWF
GO:CC	CCAAT-binding factor complex	GO:0016602	0.344983	0.462203	3	166	1	12419	NFYB
GO:CC	SREBP-SCAP-Insig complex	GO:0032937	0.344983	0.462203	3	166	1	12419	SREBF2
GO:CC	extrinsic component of external side of plasma membrane	GO:0031232	0.344983	0.462203	3	166	1	12419	WNT2
GO:CC	coated vesicle	GO:0030135	0.344983	0.462203	85	166	4	12419	CLRN1,KDELR3,PHETA2,VWF
GO:CC	box C/D RNP complex	GO:0031428	0.344983	0.462203	2	166	1	12419	SNU13
GO:CC	mitochondrion	GO:0005739	0.344983	0.462203	778	166	17	12419	ACSS3,BRAF,C1AH12ORF73,ELK3,FBXO7,GCAT,LOC105758589,MIEF1,MTERF2,NDUFA12,NDUFB2,SAMM50,SLC25A3,TOMM22,TSPO,XPNPEP3,YARS2
GO:CC	pi-body	GO:0071546	0.344983	0.462203	3	166	1	12419	ASZ1
GO:MF	pentosyltransferase activity	GO:0016763	0.346868	0.459836	41	166	2	12419	GXYLT1,RXYLT1
GO:MF	receptor ligand activity	GO:0048018	0.350547	0.455254	187	166	5	12419	FGF6,IAPP,NTF3,PMCH,WNT2
GO:MF	oxidoreductase activity, acting on NAD(P)H	GO:0016651	0.355122	0.449622	42	166	2	12419	NCF4,NDUFA12
GO:MF	signaling receptor activator activity	GO:0030546	0.35964	0.444132	191	166	5	12419	FGF6,IAPP,NTF3,PMCH,WNT2
GO:MF	cAMP response element binding	GO:0035497	0.35964	0.444132	9	166	1	12419	CREB3L2
GO:MF	lipid binding	GO:0008289	0.35964	0.444132	363	166	8	12419	APPL2,ITPR2,LOC100224455,MICALL1,NCF4,PHLDA1,PICK1,TWF1
GO:MF	sulfotransferase activity	GO:0008146	0.35964	0.444132	43	166	2	12419	LOC100228825,SULT4A1
GO:MF	calcium-release channel activity	GO:0015278	0.35964	0.444132	9	166	1	12419	ITPR2
GO:MF	CoA hydrolase activity	GO:0016289	0.375939	0.424883	10	166	1	12419	PLA2G6
GO:MF	inositol 1,4,5 trisphosphate binding	GO:0070679	0.375939	0.424883	10	166	1	12419	ITPR2
GO:MF	G protein-coupled peptide receptor activity	GO:0008528	0.375939	0.424883	91	166	3	12419	GPR37,SSTR3,VT1
GO:MF	G-protein beta-subunit binding	GO:0031681	0.375939	0.424883	10	166	1	12419	RASD2
GO:MF	protein-hormone receptor activity	GO:0016500	0.375939	0.424883	10	166	1	12419	LGR5
GO:MF	oxidoreductase activity, acting on paired donors, with incorporation or reduction of molecular oxygen, reduced flavin or flavoprotein as one donor, and incorporation of one atom of oxygen	GO:0016712	0.375939	0.424883	10	166	1	12419	LOC100222415
GO:MF	single-stranded DNA helicase activity	GO:0017116	0.375939	0.424883	10	166	1	12419	HELB
GO:CC	leading edge membrane	GO:0031256	0.380873	0.419219	60	166	3	12419	APPL2,PDXP,TWF1
GO:MF	lysophospholipase activity	GO:0004622	0.387363	0.411882	11	166	1	12419	PLA2G6
GO:MF	peptide receptor activity	GO:0001653	0.387363	0.411882	94	166	3	12419	GPR37,SSTR3,VT1
GO:MF	phospholipase A2 activity	GO:0004623	0.387363	0.411882	11	166	1	12419	PLA2G6
GO:MF	acid-amino acid ligase activity	GO:0016881	0.387363	0.411882	11	166	1	12419	TTLL1
GO:MF	ferrous iron binding	GO:0008198	0.387363	0.411882	11	166	1	12419	PHYH
GO:MF	acetylcholine receptor activity	GO:0015464	0.387363	0.411882	11	166	1	12419	CHRM2
GO:MF	peptide binding	GO:0042277	0.387363	0.411882	95	166	3	12419	GPR37,KDELR3,VT1
GO:MF	GDP-dissociation inhibitor activity	GO:0005092	0.387363	0.411882	11	166	1	12419	ERP27
GO:MF	RNA polymerase II cis-regulatory region sequence-specific DNA binding	GO:0000978	0.388525	0.410582	321	166	7	12419	CREB3L2,ELK3,NFYB,PRDM4,SREBF2,TRIM24,ZNF277
GO:MF	heterocyclic compound binding	GO:1901363	0.394472	0.403983	3111	166	48	12419	ADCK2,APAF1,BRAF,CCT2,CREB3L2,DBX2,DMC1,DUS4L,ELK3,FOXRED2,GCAT,HMGA2,IFT27,LOC100218635,LOC100218691,LOC100220543,LOC100221944,LOC100222415,LOC100224417,LOC105758589,LOC105759175,MCM10,MCM5,MIEF1,MTERF2,NFYB,PDE6H,POLR3B,POLR3H,PRDM4,PUS7,RASD2,RECQL,SEPTIN3,SNU13,SREBF2,STK38L,TBXAS1,TEF,THAP5,TRIM24,TTLL1,TTLL12,TWF1,WEE2,YARS2,ZCRB1,ZNF277
GO:MF	pseudouridine synthase activity	GO:0009982	0.394472	0.403983	12	166	1	12419	PUS7
GO:MF	calcium-dependent cysteine-type endopeptidase activity	GO:0004198	0.394472	0.403983	12	166	1	12419	LOC100225408
GO:MF	phosphatidylinositol bisphosphate binding	GO:1902936	0.394472	0.403983	51	166	2	12419	LOC100224455,TWF1
GO:MF	chemoattractant activity	GO:0042056	0.394472	0.403983	12	166	1	12419	NTF3
GO:MF	signal sequence binding	GO:0005048	0.394472	0.403983	12	166	1	12419	KDELR3
GO:MF	oxidoreductase activity, acting on NAD(P)H, oxygen as acceptor	GO:0050664	0.394472	0.403983	12	166	1	12419	NCF4
GO:MF	low-density lipoprotein particle binding	GO:0030169	0.394472	0.403983	12	166	1	12419	STAB2
GO:MF	modification-dependent protein binding	GO:0140030	0.399574	0.398403	101	166	3	12419	TRIM24,TTLL12,YEATS4
GO:MF	hormone activity	GO:0005179	0.399574	0.398403	52	166	2	12419	IAPP,PMCH
GO:MF	phosphatidic acid binding	GO:0070300	0.416194	0.380704	13	166	1	12419	MICALL1
KEGG	Vascular smooth muscle contraction	KEGG:04270	0.418992	0.377795	76	166	4	12419	BRAF,ITPR2,KCNMB4,PLA2G6
KEGG	RNA polymerase	KEGG:03020	0.418992	0.377795	15	166	2	12419	POLR3B,POLR3H
GO:MF	histone binding	GO:0042393	0.423044	0.373615	106	166	3	12419	TRIM24,TTLL12,YEATS4
GO:MF	cis-regulatory region sequence-specific DNA binding	GO:0000987	0.423044	0.373615	340	166	7	12419	CREB3L2,ELK3,NFYB,PRDM4,SREBF2,TRIM24,ZNF277
GO:MF	protease binding	GO:0002020	0.423044	0.373615	55	166	2	12419	THAP5,VWF
GO:MF	NADH dehydrogenase (ubiquinone) activity	GO:0008137	0.423044	0.373615	14	166	1	12419	NDUFA12
GO:MF	NADH dehydrogenase (quinone) activity	GO:0050136	0.423044	0.373615	14	166	1	12419	NDUFA12
GO:MF	organic cyclic compound binding	GO:0097159	0.423044	0.373615	3150	166	48	12419	ADCK2,APAF1,BRAF,CCT2,CREB3L2,DBX2,DMC1,DUS4L,ELK3,FOXRED2,GCAT,HMGA2,IFT27,LOC100218635,LOC100218691,LOC100220543,LOC100221944,LOC100222415,LOC100224417,LOC105758589,LOC105759175,MCM10,MCM5,MIEF1,MTERF2,NFYB,PDE6H,POLR3B,POLR3H,PRDM4,PUS7,RASD2,RECQL,SEPTIN3,SNU13,SREBF2,STK38L,TBXAS1,TEF,THAP5,TRIM24,TTLL1,TTLL12,TWF1,WEE2,YARS2,ZCRB1,ZNF277
GO:MF	calcium activated cation channel activity	GO:0005227	0.423044	0.373615	14	166	1	12419	KCNMB4
GO:MF	CoA-ligase activity	GO:0016405	0.423044	0.373615	14	166	1	12419	ACSS3
GO:MF	single-stranded DNA binding	GO:0003697	0.429983	0.366548	57	166	2	12419	MCM10,WEE2
GO:MF	organic acid binding	GO:0043177	0.429983	0.366548	57	166	2	12419	PHYH,YARS2
GO:MF	transmembrane signaling receptor activity	GO:0004888	0.43032	0.366209	534	166	10	12419	CELSR1,CHRM2,GPR37,GPR85,IL2RB,LGR5,NFAM1,SSTR3,VT1,WEE2
GO:MF	snoRNA binding	GO:0030515	0.431459	0.365061	15	166	1	12419	SNU13
GO:MF	NAD(P)H dehydrogenase (quinone) activity	GO:0003955	0.431459	0.365061	15	166	1	12419	NDUFA12
GO:MF	metallocarboxypeptidase activity	GO:0004181	0.431459	0.365061	15	166	1	12419	CPM
GO:MF	L-ascorbic acid binding	GO:0031418	0.431459	0.365061	15	166	1	12419	PHYH
GO:CC	cytoplasm	GO:0005737	0.43453	0.36198	5334	166	82	12419	ACSS3,ADSL,APAF1,APPL2,ASZ1,BRAF,C1AH12ORF66,C1AH12ORF73,CCDC107,CCT2,CENPM,CLRN1,COG5,CREB3L2,ELK3,ERP27,FBXO7,FOXRED2,GCAT,GPR37,GPR85,GRAP2,GTSE1,HAL,HELB,IFT27,INTS13,IQGAP3,ITPR2,KDELR3,LGR5,LMOD2,LOC100225408,LOC100229115,LOC105758589,LTA4H,MAP6D1,METAP2,MICALL1,MIEF1,MTERF2,NAGA,NCF4,NDUFA12,NDUFB2,PARVG,PDXP,PHETA2,PHYH,PICK1,PLA2G6,PPHLN1,PRDM4,PVALB,PYROXD1,REP15,RIC8B,RINT1,RXYLT1,SAMM…
GO:CC	pole plasm	GO:0045495	0.4374	0.359121	5	166	1	12419	ASZ1
GO:CC	macropinosome	GO:0044354	0.4374	0.359121	5	166	1	12419	APPL2
GO:CC	pinosome	GO:0044352	0.4374	0.359121	5	166	1	12419	APPL2
GO:CC	germ plasm	GO:0060293	0.4374	0.359121	5	166	1	12419	ASZ1
GO:CC	SAM complex	GO:0001401	0.4374	0.359121	5	166	1	12419	SAMM50
GO:CC	P granule	GO:0043186	0.4374	0.359121	5	166	1	12419	ASZ1
GO:CC	zona pellucida receptor complex	GO:0002199	0.4374	0.359121	5	166	1	12419	CCT2
GO:MF	heat shock protein binding	GO:0031072	0.438734	0.357799	61	166	2	12419	GPR37,PDXP
GO:MF	ligand-gated calcium channel activity	GO:0099604	0.438734	0.357799	16	166	1	12419	ITPR2
GO:MF	flavin adenine dinucleotide binding	GO:0050660	0.438734	0.357799	61	166	2	12419	DUS4L,FOXRED2
GO:MF	lipoprotein particle binding	GO:0071813	0.438734	0.357799	16	166	1	12419	STAB2
GO:MF	actin binding	GO:0003779	0.438734	0.357799	231	166	5	12419	LMOD2,PARVG,PICK1,TWF1,WASL
GO:MF	NADH dehydrogenase activity	GO:0003954	0.438734	0.357799	16	166	1	12419	NDUFA12
GO:MF	double-stranded DNA binding	GO:0003690	0.438734	0.357799	611	166	11	12419	CREB3L2,ELK3,MCM10,MCM5,MTERF2,NFYB,PRDM4,SREBF2,TEF,TRIM24,ZNF277
GO:MF	protein-lipid complex binding	GO:0071814	0.438734	0.357799	16	166	1	12419	STAB2
GO:MF	frizzled binding	GO:0005109	0.438734	0.357799	16	166	1	12419	WNT2
GO:MF	intracellular ligand-gated ion channel activity	GO:0005217	0.438734	0.357799	16	166	1	12419	ITPR2
GO:CC	recycling endosome	GO:0055037	0.44073	0.355828	70	166	3	12419	MICALL1,PHETA2,REP15
GO:MF	phosphotransferase activity, for other substituted phosphate groups	GO:0016780	0.443218	0.353383	17	166	1	12419	CHPT1
GO:MF	calmodulin binding	GO:0005516	0.443218	0.353383	63	166	2	12419	IQGAP3,MAP6D1
GO:MF	acid-thiol ligase activity	GO:0016878	0.443218	0.353383	17	166	1	12419	ACSS3
GO:MF	protein folding chaperone	GO:0044183	0.443218	0.353383	17	166	1	12419	CCT2
GO:MF	ion channel binding	GO:0044325	0.443218	0.353383	63	166	2	12419	ITPR2,TSPO
GO:MF	oxidoreductase activity, acting on NAD(P)H, quinone or similar compound as acceptor	GO:0016655	0.443218	0.353383	17	166	1	12419	NDUFA12
GO:CC	mitochondrial outer membrane	GO:0005741	0.448038	0.348685	72	166	3	12419	MIEF1,SAMM50,TOMM22
GO:CC	respirasome	GO:0070469	0.448038	0.348685	35	166	2	12419	NDUFA12,NDUFB2
GO:CC	cell projection membrane	GO:0031253	0.448038	0.348685	119	166	4	12419	APPL2,PDXP,SSTR3,TWF1
GO:CC	phagocytic vesicle membrane	GO:0030670	0.448038	0.348685	7	166	1	12419	APPL2
GO:CC	chaperonin-containing T-complex	GO:0005832	0.448038	0.348685	7	166	1	12419	CCT2
GO:CC	chromatin	GO:0000785	0.448038	0.348685	280	166	7	12419	HMGA2,LOC100218635,LOC100218691,LOC100220543,LOC100221944,LOC100224417,THAP5
GO:CC	NADPH oxidase complex	GO:0043020	0.448038	0.348685	7	166	1	12419	NCF4
GO:CC	outer membrane	GO:0019867	0.448038	0.348685	79	166	3	12419	MIEF1,SAMM50,TOMM22
GO:CC	cholinergic synapse	GO:0098981	0.448038	0.348685	6	166	1	12419	CHRM2
GO:CC	organelle outer membrane	GO:0031968	0.448038	0.348685	79	166	3	12419	MIEF1,SAMM50,TOMM22
GO:CC	MCM complex	GO:0042555	0.448038	0.348685	7	166	1	12419	MCM5
GO:CC	intracellular organelle	GO:0043229	0.448038	0.348685	6335	166	94	12419	ACSS3,APPL2,ASZ1,BRAF,C1AH12ORF66,C1AH12ORF73,CBY1,CCDC107,CCT2,CLRN1,COG5,CREB3L2,DMC1,ELK3,FBXO7,FOXRED2,GCAT,GPR37,GPR85,GRAP2,GTSE1,HELB,HMGA2,IFT27,INTS13,ITPR2,KDELR3,LGR5,LMOD2,LOC100218635,LOC100218691,LOC100220543,LOC100221944,LOC100224417,LOC100229115,LOC105758589,LTA4H,MAP6D1,MCM10,MCM5,MED21,MICALL1,MIEF1,MTERF2,NAGA,NCF4,NDUFA12,NDUFB2,NFYB,NUP37,PARVG,PDXP,PHETA2,PHLDA1,PHYH,PICK1,P…
GO:CC	early phagosome	GO:0032009	0.448038	0.348685	7	166	1	12419	APPL2
GO:CC	sarcoplasmic reticulum membrane	GO:0033017	0.448038	0.348685	7	166	1	12419	ITPR2
GO:MF	ligase activity	GO:0016874	0.44861	0.348131	118	166	3	12419	ACSS3,TTLL1,YARS2
GO:MF	catalytic activity, acting on RNA	GO:0140098	0.454973	0.342014	238	166	5	12419	DMC1,DUS4L,POLR3B,POLR3H,YARS2
GO:MF	3',5'-cyclic-nucleotide phosphodiesterase activity	GO:0004114	0.455957	0.341076	18	166	1	12419	PDE6H
GO:CC	ruffle	GO:0001726	0.461848	0.3355	81	166	3	12419	APPL2,PDXP,TWF1
GO:MF	cyclic nucleotide binding	GO:0030551	0.470618	0.327331	19	166	1	12419	PDE6H
GO:MF	cyclic-nucleotide phosphodiesterase activity	GO:0004112	0.470618	0.327331	19	166	1	12419	PDE6H
GO:MF	hyaluronic acid binding	GO:0005540	0.470618	0.327331	19	166	1	12419	STAB2
GO:CC	organelle	GO:0043226	0.47963	0.319094	6495	166	95	12419	ACSS3,APPL2,ASZ1,BRAF,C1AH12ORF66,C1AH12ORF73,CBY1,CCDC107,CCT2,CLRN1,COG5,CREB3L2,DMC1,ELK3,FBXO7,FOXRED2,GCAT,GPR37,GPR85,GRAP2,GTSE1,HELB,HMGA2,IFT27,INTS13,ITPR2,KDELR3,LGR5,LMOD2,LOC100218635,LOC100218691,LOC100220543,LOC100221944,LOC100224417,LOC100229115,LOC105758589,LTA4H,MAP6D1,MCM10,MCM5,MED21,MICALL1,MIEF1,MTERF2,NAGA,NCF4,NDUFA12,NDUFB2,NFYB,NUP37,PARVG,PDXP,PHETA2,PHLDA1,PHYH,PICK1,P…
GO:CC	nuclear pore outer ring	GO:0031080	0.47963	0.319094	9	166	1	12419	NUP37
GO:CC	DNA replication factor A complex	GO:0005662	0.47963	0.319094	9	166	1	12419	HELB
GO:CC	M band	GO:0031430	0.47963	0.319094	9	166	1	12419	LMOD2
GO:CC	myofibril	GO:0030016	0.47963	0.319094	88	166	3	12419	LMOD2,PYROXD1,TWF1
GO:CC	cell leading edge	GO:0031252	0.47963	0.319094	191	166	5	12419	APPL2,CLRN1,PDXP,TWF1,WASL
GO:CC	COPI-coated vesicle membrane	GO:0030663	0.47963	0.319094	9	166	1	12419	KDELR3
GO:CC	contractile ring	GO:0070938	0.47963	0.319094	8	166	1	12419	PDXP
GO:CC	sperm principal piece	GO:0097228	0.47963	0.319094	9	166	1	12419	IFT27
GO:CC	Golgi transport complex	GO:0017119	0.47963	0.319094	8	166	1	12419	COG5
GO:CC	ciliary basal body	GO:0036064	0.480773	0.31806	89	166	3	12419	CBY1,TTC26,TTLL1
GO:CC	contractile fiber	GO:0043292	0.483122	0.315943	91	166	3	12419	LMOD2,PYROXD1,TWF1
GO:CC	lamellipodium	GO:0030027	0.483122	0.315943	92	166	3	12419	CLRN1,PDXP,WASL
GO:CC	COPI-coated vesicle	GO:0030137	0.483122	0.315943	10	166	1	12419	KDELR3
GO:CC	NuA4 histone acetyltransferase complex	GO:0035267	0.483122	0.315943	10	166	1	12419	YEATS4
GO:CC	membrane-bounded organelle	GO:0043227	0.483122	0.315943	5840	166	86	12419	ACSS3,APPL2,BRAF,C1AH12ORF66,C1AH12ORF73,CBY1,CCDC107,CLRN1,COG5,CREB3L2,DMC1,ELK3,FBXO7,FOXRED2,GCAT,GPR37,GPR85,GRAP2,HELB,HMGA2,IFT27,INTS13,ITPR2,KDELR3,LGR5,LOC100218635,LOC100218691,LOC100220543,LOC100221944,LOC100224417,LOC100229115,LOC105758589,LTA4H,MAP6D1,MCM10,MCM5,MED21,MICALL1,MIEF1,MTERF2,NAGA,NCF4,NDUFA12,NDUFB2,NFYB,NUP37,PHETA2,PHLDA1,PHYH,PMCH,POLR3B,POLR3H,PPHLN1,PRDM4,PUS7,PYR…
GO:CC	mitochondrial membrane	GO:0031966	0.483122	0.315943	255	166	6	12419	C1AH12ORF73,MIEF1,NDUFA12,NDUFB2,SAMM50,TOMM22
KEGG	Regulation of actin cytoskeleton	KEGG:04810	0.486628	0.312803	138	166	5	12419	BRAF,CHRM2,FGF6,IQGAP3,WASL
KEGG	Ether lipid metabolism	KEGG:00565	0.486628	0.312803	22	166	2	12419	CHPT1,PLA2G6
KEGG	Cytosolic DNA-sensing pathway	KEGG:04623	0.486628	0.312803	25	166	2	12419	POLR3B,POLR3H
GO:CC	vesicle tethering complex	GO:0099023	0.488624	0.311025	47	166	2	12419	COG5,RINT1
GO:BP	negative regulation of protein-containing complex disassembly	GO:0043242	0.492265	0.307801	43	166	3	12419	LMOD2,MAP6D1,TWF1
GO:BP	negative regulation of cyclin-dependent protein serine/threonine kinase activity	GO:0045736	0.492265	0.307801	16	166	2	12419	FBXO7,WEE2
GO:BP	FasL biosynthetic process	GO:0045210	0.492265	0.307801	1	166	1	12419	PHLDA1
GO:BP	vitamin B6 catabolic process	GO:0042820	0.492265	0.307801	1	166	1	12419	PDXP
GO:BP	maintenance of protein location	GO:0045185	0.492265	0.307801	47	166	3	12419	KDELR3,TSPO,TWF1
GO:BP	vitamin B6 metabolic process	GO:0042816	0.492265	0.307801	3	166	1	12419	PDXP
GO:BP	establishment of protein localization to mitochondrion	GO:0072655	0.492265	0.307801	38	166	4	12419	FBXO7,SAMM50,TOMM22,TSPO
GO:BP	inter-Golgi cisterna vesicle-mediated transport	GO:0048219	0.492265	0.307801	1	166	1	12419	COG5
GO:BP	multi-organism reproductive process	GO:0044703	0.492265	0.307801	355	166	10	12419	ASZ1,CCT2,IFT27,LGR5,SNU13,SPAM1,SYCE3,TTC26,TTLL1,WEE2
GO:BP	'de novo' AMP biosynthetic process	GO:0044208	0.492265	0.307801	3	166	1	12419	ADSL
GO:BP	establishment of body hair planar orientation	GO:0048105	0.492265	0.307801	3	166	1	12419	CELSR1
GO:BP	regulation of protein-containing complex disassembly	GO:0043244	0.492265	0.307801	61	166	4	12419	LMOD2,MAP6D1,PDXP,TWF1
GO:BP	activation of MAPK activity	GO:0000187	0.492265	0.307801	55	166	3	12419	IQGAP3,NTF3,PDE6H
GO:BP	icosanoid biosynthetic process	GO:0046456	0.492265	0.307801	21	166	2	12419	LTA4H,TBXAS1
GO:BP	N-acetylneuraminate metabolic process	GO:0006054	0.492265	0.307801	3	166	1	12419	CMAS
GO:BP	carboxylic acid catabolic process	GO:0046395	0.492265	0.307801	90	166	4	12419	GCAT,HAL,PAH,PHYH
GO:BP	box C/D snoRNP assembly	GO:0000492	0.492265	0.307801	3	166	1	12419	SNU13
GO:BP	L-arabinose metabolic process	GO:0046373	0.492265	0.307801	2	166	1	12419	OTOGL
GO:BP	cellular protein complex disassembly	GO:0043624	0.492265	0.307801	70	166	4	12419	LMOD2,MAP6D1,PDXP,TWF1
GO:BP	establishment of body hair or bristle planar orientation	GO:0048104	0.492265	0.307801	3	166	1	12419	CELSR1
GO:BP	protein localization involved in establishment of planar polarity	GO:0090251	0.492265	0.307801	1	166	1	12419	CELSR1
GO:BP	actin phosphorylation	GO:0031289	0.492265	0.307801	1	166	1	12419	TWF1
GO:BP	N-terminal protein amino acid modification	GO:0031365	0.492265	0.307801	19	166	2	12419	MAP6D1,METAP2
GO:BP	establishment of protein localization to mitochondrial membrane	GO:0090151	0.492265	0.307801	9	166	2	12419	SAMM50,TOMM22
GO:BP	regulation of actin phosphorylation	GO:0043538	0.492265	0.307801	1	166	1	12419	TWF1
GO:BP	actin rod assembly	GO:0031247	0.492265	0.307801	2	166	1	12419	PDXP
GO:BP	pyridoxal phosphate metabolic process	GO:0042822	0.492265	0.307801	3	166	1	12419	PDXP
GO:BP	sequestering of actin monomers	GO:0042989	0.492265	0.307801	2	166	1	12419	TWF1
GO:BP	inner ear receptor cell stereocilium organization	GO:0060122	0.492265	0.307801	20	166	2	12419	CLRN1,IFT27
GO:BP	fatty acid alpha-oxidation	GO:0001561	0.492265	0.307801	3	166	1	12419	PHYH
GO:BP	regulation of actin cytoskeleton organization	GO:0032956	0.492265	0.307801	169	166	7	12419	BRAF,CELSR1,LMOD2,NTF3,PDXP,TWF1,WASL
GO:BP	mitochondrial tyrosyl-tRNA aminoacylation	GO:0070184	0.492265	0.307801	1	166	1	12419	YARS2
GO:BP	protein initiator methionine removal	GO:0070084	0.492265	0.307801	3	166	1	12419	METAP2
GO:BP	multi-organism process	GO:0051704	0.492265	0.307801	376	166	10	12419	ASZ1,CCT2,IFT27,LGR5,SNU13,SPAM1,SYCE3,TTC26,TTLL1,WEE2
GO:BP	regulation of phagocytosis, engulfment	GO:0060099	0.492265	0.307801	2	166	1	12419	APPL2
GO:BP	meiosis I cell cycle process	GO:0061982	0.492265	0.307801	50	166	3	12419	DMC1,SYCE3,WEE2
GO:BP	regulation of actin filament-based process	GO:0032970	0.492265	0.307801	183	166	7	12419	BRAF,CELSR1,LMOD2,NTF3,PDXP,TWF1,WASL
GO:BP	regulation of meiosis I	GO:0060631	0.492265	0.307801	2	166	1	12419	WEE2
GO:BP	regulation of organelle organization	GO:0033043	0.492265	0.307801	589	166	15	12419	BRAF,CCT2,CELSR1,FBXO7,LMOD2,LOC100225408,MAP6D1,MIEF1,NTF3,PDXP,PPHLN1,TSPO,TWF1,WASL,WEE2
GO:BP	mitochondrial respiratory chain complex assembly	GO:0033108	0.492265	0.307801	45	166	4	12419	C1AH12ORF73,NDUFA12,NDUFB2,SAMM50
GO:BP	positive regulation of epithelial cell proliferation involved in lung morphogenesis	GO:0060501	0.492265	0.307801	2	166	1	12419	WNT2
GO:BP	lung induction	GO:0060492	0.492265	0.307801	3	166	1	12419	WNT2
GO:BP	lateral sprouting involved in lung morphogenesis	GO:0060490	0.492265	0.307801	1	166	1	12419	CELSR1
GO:BP	planar dichotomous subdivision of terminal units involved in lung branching morphogenesis	GO:0060489	0.492265	0.307801	1	166	1	12419	CELSR1
GO:BP	orthogonal dichotomous subdivision of terminal units involved in lung branching morphogenesis	GO:0060488	0.492265	0.307801	1	166	1	12419	CELSR1
GO:BP	dichotomous subdivision of terminal units involved in lung branching	GO:0060448	0.492265	0.307801	2	166	1	12419	CELSR1
GO:BP	protein localization to organelle	GO:0033365	0.492265	0.307801	462	166	12	12419	APPL2,C1AH12ORF66,CCT2,FBXO7,INTS13,KDELR3,MICALL1,PPHLN1,SAMM50,TOMM22,TSPO,TTC26
GO:BP	epithelial tube branching involved in lung morphogenesis	GO:0060441	0.492265	0.307801	23	166	2	12419	CELSR1,WNT2
GO:BP	lung field specification	GO:0060424	0.492265	0.307801	3	166	1	12419	WNT2
GO:BP	foregut regionalization	GO:0060423	0.492265	0.307801	3	166	1	12419	WNT2
GO:BP	immune response-regulating cell surface receptor signaling pathway involved in phagocytosis	GO:0002433	0.492265	0.307801	3	166	1	12419	APPL2
GO:BP	positive regulation of Fc receptor mediated stimulatory signaling pathway	GO:0060369	0.492265	0.307801	2	166	1	12419	APPL2
GO:BP	immune response in nasopharyngeal-associated lymphoid tissue	GO:0002395	0.492265	0.307801	1	166	1	12419	TTLL1
GO:BP	positive regulation of phagocytosis, engulfment	GO:0060100	0.492265	0.307801	2	166	1	12419	APPL2
GO:BP	immune response in gut-associated lymphoid tissue	GO:0002387	0.492265	0.307801	1	166	1	12419	TTLL1
GO:BP	actin filament capping	GO:0051693	0.492265	0.307801	19	166	2	12419	LMOD2,TWF1
GO:BP	establishment of protein localization to organelle	GO:0072594	0.492265	0.307801	183	166	6	12419	APPL2,CCT2,FBXO7,SAMM50,TOMM22,TSPO
GO:BP	DNA duplex unwinding	GO:0032508	0.492265	0.307801	51	166	3	12419	HELB,MCM5,RECQL
GO:BP	maintenance of protein location in cell	GO:0032507	0.492265	0.307801	33	166	3	12419	KDELR3,TSPO,TWF1
GO:BP	water-soluble vitamin catabolic process	GO:0042365	0.492265	0.307801	1	166	1	12419	PDXP
GO:BP	intraciliary transport	GO:0042073	0.492265	0.307801	22	166	2	12419	IFT27,TTC26
GO:BP	positive regulation of axon regeneration	GO:0048680	0.492265	0.307801	2	166	1	12419	BRAF
GO:BP	positive regulation of B cell receptor signaling pathway	GO:0050861	0.492265	0.307801	3	166	1	12419	NFAM1
GO:BP	somatostatin signaling pathway	GO:0038170	0.492265	0.307801	3	166	1	12419	SSTR3
GO:BP	somatostatin receptor signaling pathway	GO:0038169	0.492265	0.307801	3	166	1	12419	SSTR3
GO:BP	Fc-gamma receptor signaling pathway	GO:0038094	0.492265	0.307801	3	166	1	12419	APPL2
GO:BP	chaperone mediated protein folding independent of cofactor	GO:0051086	0.492265	0.307801	1	166	1	12419	CCT2
GO:BP	pyridoxal phosphate catabolic process	GO:0032361	0.492265	0.307801	1	166	1	12419	PDXP
GO:BP	cardiolipin acyl-chain remodeling	GO:0035965	0.492265	0.307801	1	166	1	12419	PLA2G6
GO:BP	rRNA import into mitochondrion	GO:0035928	0.492265	0.307801	3	166	1	12419	LOC105758589
GO:BP	protein insertion into mitochondrial membrane	GO:0051204	0.492265	0.307801	9	166	2	12419	SAMM50,TOMM22
GO:BP	protein insertion into membrane	GO:0051205	0.492265	0.307801	23	166	2	12419	SAMM50,TOMM22
GO:BP	DNA geometric change	GO:0032392	0.492265	0.307801	51	166	3	12419	HELB,MCM5,RECQL
GO:BP	protein localization to mitochondrion	GO:0070585	0.492265	0.307801	40	166	4	12419	FBXO7,SAMM50,TOMM22,TSPO
GO:BP	RNA import into mitochondrion	GO:0035927	0.492265	0.307801	3	166	1	12419	LOC105758589
GO:BP	positive regulation of neuron projection regeneration	GO:0070572	0.492265	0.307801	2	166	1	12419	BRAF
GO:BP	slow endocytic recycling	GO:0032458	0.492265	0.307801	1	166	1	12419	MICALL1
GO:BP	protein depolymerization	GO:0051261	0.492265	0.307801	58	166	4	12419	LMOD2,MAP6D1,PDXP,TWF1
GO:BP	regulation of cytoskeleton organization	GO:0051493	0.492265	0.307801	259	166	9	12419	BRAF,CELSR1,LMOD2,LOC100225408,MAP6D1,NTF3,PDXP,TWF1,WASL
GO:BP	homologous recombination	GO:0035825	0.492265	0.307801	19	166	2	12419	DMC1,SYCE3
GO:BP	positive regulation of cytoskeleton organization	GO:0051495	0.492265	0.307801	107	166	5	12419	BRAF,LMOD2,NTF3,PDXP,WASL
GO:BP	tRNA threonylcarbamoyladenosine modification	GO:0002949	0.492265	0.307801	3	166	1	12419	TPRKB
GO:BP	receptor recycling	GO:0001881	0.492265	0.307801	23	166	2	12419	PHETA2,REP15
GO:BP	tRNA dihydrouridine synthesis	GO:0002943	0.492265	0.307801	3	166	1	12419	DUS4L
GO:BP	female pronucleus assembly	GO:0035038	0.492265	0.307801	2	166	1	12419	WEE2
GO:BP	Fc-gamma receptor signaling pathway involved in phagocytosis	GO:0038096	0.492265	0.307801	3	166	1	12419	APPL2
GO:BP	meiosis I	GO:0007127	0.492265	0.307801	49	166	3	12419	DMC1,SYCE3,WEE2
GO:BP	protein insertion into mitochondrial outer membrane	GO:0045040	0.492265	0.307801	4	166	2	12419	SAMM50,TOMM22
GO:BP	tyrosyl-tRNA aminoacylation	GO:0006437	0.492265	0.307801	2	166	1	12419	YARS2
GO:BP	meiotic cell cycle process	GO:1903046	0.492265	0.307801	90	166	4	12419	ASZ1,DMC1,SYCE3,WEE2
GO:BP	tRNA modification	GO:0006400	0.492265	0.307801	48	166	3	12419	DUS4L,PUS7,TPRKB
GO:BP	regulation of autophagy of mitochondrion	GO:1903146	0.492265	0.307801	14	166	2	12419	FBXO7,TSPO
GO:BP	cellular component disassembly	GO:0022411	0.492265	0.307801	183	166	6	12419	FBXO7,LMOD2,MAP6D1,PDXP,TSPO,TWF1
GO:BP	negative regulation of autophagy of mitochondrion	GO:1903147	0.492265	0.307801	2	166	1	12419	TSPO
GO:BP	platelet activating factor biosynthetic process	GO:0006663	0.492265	0.307801	2	166	1	12419	CHPT1
GO:BP	organic acid catabolic process	GO:0016054	0.492265	0.307801	96	166	4	12419	GCAT,HAL,PAH,PHYH
GO:BP	negative regulation of cell maturation	GO:1903430	0.492265	0.307801	3	166	1	12419	WEE2
GO:BP	cellular process involved in reproduction in multicellular organism	GO:0022412	0.492265	0.307801	171	166	6	12419	ASZ1,LGR5,SPAM1,TTC26,TTLL1,WEE2
GO:BP	negative regulation of membrane tubulation	GO:1903526	0.492265	0.307801	2	166	1	12419	WASL
GO:BP	regulation of DNA double-strand break processing	GO:1903775	0.492265	0.307801	1	166	1	12419	HELB
GO:BP	regulation of fibroblast migration	GO:0010762	0.492265	0.307801	19	166	2	12419	APPL2,BRAF
GO:BP	negative regulation of cyclin-dependent protein kinase activity	GO:1904030	0.492265	0.307801	16	166	2	12419	FBXO7,WEE2
GO:BP	actin cytoskeleton organization	GO:0030036	0.492265	0.307801	339	166	9	12419	BRAF,CELSR1,CLRN1,LMOD2,NTF3,PARVG,PDXP,TWF1,WASL
GO:BP	positive regulation of organelle organization	GO:0010638	0.492265	0.307801	295	166	9	12419	BRAF,CCT2,FBXO7,LMOD2,MIEF1,NTF3,PDXP,PPHLN1,WASL
GO:BP	actin filament depolymerization	GO:0030042	0.492265	0.307801	31	166	3	12419	LMOD2,PDXP,TWF1
GO:BP	sexual reproduction	GO:0019953	0.492265	0.307801	313	166	10	12419	ASZ1,CCT2,IFT27,LGR5,SNU13,SPAM1,SYCE3,TTC26,TTLL1,WEE2
GO:BP	cold acclimation	GO:0009631	0.492265	0.307801	1	166	1	12419	APPL2
GO:BP	regulation of supramolecular fiber organization	GO:1902903	0.492265	0.307801	182	166	6	12419	BRAF,LMOD2,MAP6D1,PDXP,TWF1,WASL
GO:BP	erythrose 4-phosphate/phosphoenolpyruvate family amino acid catabolic process	GO:1902222	0.492265	0.307801	3	166	1	12419	PAH
GO:BP	negative regulation of oocyte maturation	GO:1900194	0.492265	0.307801	2	166	1	12419	WEE2
GO:BP	reciprocal homologous recombination	GO:0140527	0.492265	0.307801	19	166	2	12419	DMC1,SYCE3
GO:BP	L-phenylalanine metabolic process	GO:0006558	0.492265	0.307801	3	166	1	12419	PAH
GO:BP	meiotic nuclear division	GO:0140013	0.492265	0.307801	82	166	4	12419	ASZ1,DMC1,SYCE3,WEE2
GO:BP	regulation of protein depolymerization	GO:1901879	0.492265	0.307801	46	166	4	12419	LMOD2,MAP6D1,PDXP,TWF1
GO:BP	L-phenylalanine catabolic process	GO:0006559	0.492265	0.307801	3	166	1	12419	PAH
GO:BP	negative regulation of protein depolymerization	GO:1901880	0.492265	0.307801	38	166	3	12419	LMOD2,MAP6D1,TWF1
GO:BP	threonine metabolic process	GO:0006566	0.492265	0.307801	3	166	1	12419	GCAT
GO:BP	threonine catabolic process	GO:0006567	0.492265	0.307801	2	166	1	12419	GCAT
GO:BP	protein targeting	GO:0006605	0.492265	0.307801	111	166	5	12419	FBXO7,MICALL1,MIEF1,SAMM50,TOMM22
GO:BP	arabinose metabolic process	GO:0019566	0.492265	0.307801	2	166	1	12419	OTOGL
GO:BP	protein retention in ER lumen	GO:0006621	0.492265	0.307801	2	166	1	12419	KDELR3
GO:BP	protein targeting to mitochondrion	GO:0006626	0.492265	0.307801	33	166	3	12419	FBXO7,SAMM50,TOMM22
GO:BP	regulation of blastocyst development	GO:0120222	0.492265	0.307801	3	166	1	12419	TTLL1
GO:BP	erythrose 4-phosphate/phosphoenolpyruvate family amino acid metabolic process	GO:1902221	0.492265	0.307801	3	166	1	12419	PAH
GO:BP	mucociliary clearance	GO:0120197	0.492265	0.307801	3	166	1	12419	TTLL1
GO:BP	regulation of actin filament organization	GO:0110053	0.492265	0.307801	133	166	5	12419	BRAF,LMOD2,PDXP,TWF1,WASL
GO:BP	N-terminal peptidyl-L-cysteine N-palmitoylation	GO:0018009	0.492265	0.307801	1	166	1	12419	MAP6D1
GO:BP	fertilization	GO:0009566	0.492265	0.307801	63	166	4	12419	CCT2,SNU13,SPAM1,WEE2
GO:BP	N-terminal protein palmitoylation	GO:0006500	0.492265	0.307801	2	166	1	12419	MAP6D1
GO:BP	regulation of actin filament length	GO:0030832	0.492265	0.307801	86	166	4	12419	LMOD2,PDXP,TWF1,WASL
GO:BP	methyl-branched fatty acid metabolic process	GO:0097089	0.492265	0.307801	2	166	1	12419	PHYH
GO:BP	regulation of Fc-gamma receptor signaling pathway involved in phagocytosis	GO:1905449	0.492265	0.307801	3	166	1	12419	APPL2
GO:BP	positive regulation of Fc-gamma receptor signaling pathway involved in phagocytosis	GO:1905451	0.492265	0.307801	2	166	1	12419	APPL2
GO:BP	actin modification	GO:0030047	0.492265	0.307801	3	166	1	12419	TWF1
GO:BP	actin polymerization or depolymerization	GO:0008154	0.492265	0.307801	95	166	4	12419	LMOD2,PDXP,TWF1,WASL
GO:BP	regulation of actin polymerization or depolymerization	GO:0008064	0.492265	0.307801	86	166	4	12419	LMOD2,PDXP,TWF1,WASL
GO:BP	fusion of sperm to egg plasma membrane involved in single fertilization	GO:0007342	0.492265	0.307801	2	166	1	12419	SPAM1
GO:BP	organelle organization	GO:0006996	0.492265	0.307801	1922	166	35	12419	ASZ1,BRAF,C1AH12ORF73,CBY1,CCT2,CELSR1,CLRN1,DMC1,FBXO7,HELB,IFT27,INTS13,LMOD2,LOC100225408,MAP6D1,MCM5,MIEF1,NDUFA12,NDUFB2,NTF3,PARVG,PDXP,PHETA2,PPHLN1,RECQL,SAMM50,SYCE3,TOMM22,TSPO,TTC26,TTLL1,TWF1,WASL,WEE2,YEATS4
GO:BP	single fertilization	GO:0007338	0.492265	0.307801	45	166	4	12419	CCT2,SNU13,SPAM1,WEE2
GO:BP	negative regulation of synaptic vesicle exocytosis	GO:2000301	0.492265	0.307801	2	166	1	12419	BRAF
GO:BP	mitochondrion organization	GO:0007005	0.492265	0.307801	222	166	8	12419	C1AH12ORF73,FBXO7,MIEF1,NDUFA12,NDUFB2,SAMM50,TOMM22,TSPO
GO:BP	DNA replication initiation	GO:0006270	0.492265	0.307801	17	166	2	12419	MCM10,MCM5
GO:BP	outer mitochondrial membrane organization	GO:0007008	0.492265	0.307801	4	166	2	12419	SAMM50,TOMM22
GO:BP	epithelial cell proliferation involved in renal tubule morphogenesis	GO:2001013	0.492265	0.307801	2	166	1	12419	LGR5
GO:BP	reciprocal meiotic recombination	GO:0007131	0.492265	0.307801	19	166	2	12419	DMC1,SYCE3
GO:BP	cellular amino acid catabolic process	GO:0009063	0.492265	0.307801	38	166	3	12419	GCAT,HAL,PAH
GO:BP	negative regulation of actin filament depolymerization	GO:0030835	0.492265	0.307801	22	166	2	12419	LMOD2,TWF1
GO:BP	activation of cysteine-type endopeptidase activity involved in apoptotic process by cytochrome c	GO:0008635	0.492265	0.307801	2	166	1	12419	APAF1
GO:BP	canonical Wnt signaling pathway involved in midbrain dopaminergic neuron differentiation	GO:1904954	0.492265	0.307801	3	166	1	12419	WNT2
GO:BP	regulation of actin filament depolymerization	GO:0030834	0.492265	0.307801	28	166	3	12419	LMOD2,PDXP,TWF1
GO:BP	plasma membrane tubulation	GO:0097320	0.492265	0.307801	15	166	2	12419	MICALL1,WASL
GO:BP	regulation of membrane invagination	GO:1905153	0.492265	0.307801	2	166	1	12419	APPL2
GO:BP	positive regulation of macropinocytosis	GO:1905303	0.492265	0.307801	2	166	1	12419	APPL2
GO:BP	protein localization to heterochromatin	GO:0097355	0.492265	0.307801	1	166	1	12419	PPHLN1
GO:BP	regulation of macropinocytosis	GO:1905301	0.492265	0.307801	2	166	1	12419	APPL2
GO:BP	positive regulation of membrane invagination	GO:1905155	0.492265	0.307801	2	166	1	12419	APPL2
GO:BP	fibroblast migration	GO:0010761	0.495518	0.304941	24	166	2	12419	APPL2,BRAF
GO:BP	oocyte differentiation	GO:0009994	0.495518	0.304941	24	166	2	12419	LGR5,WEE2
GO:BP	positive regulation of Arp2/3 complex-mediated actin nucleation	GO:2000601	0.497383	0.303309	4	166	1	12419	WASL
GO:BP	regulation of epithelial cell proliferation involved in lung morphogenesis	GO:2000794	0.497383	0.303309	4	166	1	12419	WNT2
GO:BP	positive regulation of dopamine metabolic process	GO:0045964	0.497383	0.303309	4	166	1	12419	GPR37
GO:BP	regulation of Fc receptor mediated stimulatory signaling pathway	GO:0060368	0.497383	0.303309	4	166	1	12419	APPL2
GO:BP	formamide metabolic process	GO:0043606	0.497383	0.303309	4	166	1	12419	HAL
GO:BP	myeloid progenitor cell differentiation	GO:0002318	0.497383	0.303309	4	166	1	12419	BRAF
GO:BP	positive regulation of catecholamine metabolic process	GO:0045915	0.497383	0.303309	4	166	1	12419	GPR37
GO:BP	small molecule catabolic process	GO:0044282	0.497383	0.303309	150	166	5	12419	GCAT,HAL,PAH,PDXP,PHYH
GO:BP	primary lung bud formation	GO:0060431	0.497383	0.303309	4	166	1	12419	WNT2
GO:BP	plasma membrane fusion	GO:0045026	0.497383	0.303309	4	166	1	12419	SPAM1
GO:BP	positive regulation of cellular amine metabolic process	GO:0033240	0.497383	0.303309	4	166	1	12419	GPR37
GO:BP	positive regulation of telomerase RNA localization to Cajal body	GO:1904874	0.497383	0.303309	4	166	1	12419	CCT2
GO:BP	atrial cardiac muscle tissue morphogenesis	GO:0055009	0.497383	0.303309	4	166	1	12419	WNT2
GO:BP	negative regulation of oxidative stress-induced cell death	GO:1903202	0.497383	0.303309	26	166	2	12419	FBXO7,GPR37
GO:BP	regulation of mesoderm development	GO:2000380	0.497383	0.303309	4	166	1	12419	PUS7
GO:BP	obsolete DNA strand renaturation	GO:0000733	0.497383	0.303309	4	166	1	12419	RECQL
GO:BP	regulation of oocyte maturation	GO:1900193	0.497383	0.303309	4	166	1	12419	WEE2
GO:BP	cellular protein localization	GO:0034613	0.497383	0.303309	879	166	18	12419	APPL2,C1AH12ORF66,CCT2,CELSR1,FBXO7,IFT27,INTS13,KDELR3,MICALL1,MIEF1,PPHLN1,SAMM50,TOM1,TOMM22,TSPO,TTC26,TWF1,WASL
GO:BP	positive regulation of pinocytosis	GO:0048549	0.497383	0.303309	4	166	1	12419	APPL2
GO:BP	positive regulation of MAP kinase activity	GO:0043406	0.497383	0.303309	100	166	4	12419	IQGAP3,NTF3,PDE6H,TAB1
GO:BP	platelet activating factor metabolic process	GO:0046469	0.497383	0.303309	4	166	1	12419	CHPT1
GO:BP	manchette assembly	GO:1905198	0.497383	0.303309	4	166	1	12419	TTC26
GO:BP	positive regulation of supramolecular fiber organization	GO:1902905	0.497383	0.303309	99	166	4	12419	BRAF,LMOD2,PDXP,WASL
GO:BP	regulation of mitochondrion organization	GO:0010821	0.497383	0.303309	60	166	3	12419	FBXO7,MIEF1,TSPO
GO:BP	autophagy of mitochondrion	GO:0000422	0.497383	0.303309	26	166	2	12419	FBXO7,TSPO
GO:BP	meiotic cell cycle	GO:0051321	0.497383	0.303309	100	166	4	12419	ASZ1,DMC1,SYCE3,WEE2
GO:BP	CDP-choline pathway	GO:0006657	0.497383	0.303309	4	166	1	12419	CHPT1
GO:BP	rRNA transport	GO:0051029	0.497383	0.303309	4	166	1	12419	LOC105758589
GO:BP	mitochondrial transport	GO:0006839	0.497383	0.303309	97	166	4	12419	FBXO7,LOC105758589,SAMM50,TOMM22
GO:BP	vitamin catabolic process	GO:0009111	0.497383	0.303309	4	166	1	12419	PDXP
GO:BP	tRNA pseudouridine synthesis	GO:0031119	0.497383	0.303309	4	166	1	12419	PUS7
GO:BP	protein-containing complex localization	GO:0031503	0.497383	0.303309	105	166	4	12419	IFT27,LOC105759175,TTC26,WASL
GO:BP	establishment of protein localization to membrane	GO:0090150	0.497383	0.303309	103	166	4	12419	MICALL1,MIEF1,SAMM50,TOMM22
GO:BP	detection of calcium ion	GO:0005513	0.497383	0.303309	4	166	1	12419	KCNMB4
GO:BP	scaRNA localization to Cajal body	GO:0090666	0.497383	0.303309	4	166	1	12419	CCT2
GO:BP	tRNA aminoacylation for mitochondrial protein translation	GO:0070127	0.497383	0.303309	4	166	1	12419	YARS2
GO:BP	maintenance of protein location in mitochondrion	GO:0072656	0.497383	0.303309	4	166	1	12419	TSPO
GO:BP	maintenance of protein localization in organelle	GO:0072595	0.497383	0.303309	25	166	2	12419	KDELR3,TSPO
GO:BP	histidine catabolic process to glutamate and formamide	GO:0019556	0.497383	0.303309	4	166	1	12419	HAL
GO:BP	mitochondrion disassembly	GO:0061726	0.497383	0.303309	26	166	2	12419	FBXO7,TSPO
GO:BP	atrial cardiac muscle tissue development	GO:0003228	0.497383	0.303309	4	166	1	12419	WNT2
GO:BP	histidine catabolic process to glutamate and formate	GO:0019557	0.497383	0.303309	4	166	1	12419	HAL
GO:BP	cardiolipin biosynthetic process	GO:0032049	0.497383	0.303309	4	166	1	12419	PLA2G6
GO:BP	positive regulation of DNA methylation-dependent heterochromatin assembly	GO:0090309	0.497383	0.303309	4	166	1	12419	PPHLN1
GO:BP	cellular macromolecule localization	GO:0070727	0.497383	0.303309	883	166	18	12419	APPL2,C1AH12ORF66,CCT2,CELSR1,FBXO7,IFT27,INTS13,KDELR3,MICALL1,MIEF1,PPHLN1,SAMM50,TOM1,TOMM22,TSPO,TTC26,TWF1,WASL
GO:BP	pyridine-containing compound catabolic process	GO:0072526	0.497383	0.303309	4	166	1	12419	PDXP
GO:MF	heme binding	GO:0020037	0.498394	0.302427	70	166	2	12419	LOC100222415,TBXAS1
GO:CC	oxidoreductase complex	GO:1990204	0.499119	0.301796	48	166	2	12419	NCF4,NDUFB2
GO:CC	H4/H2A histone acetyltransferase complex	GO:0043189	0.503524	0.29798	11	166	1	12419	YEATS4
GO:MF	amide binding	GO:0033218	0.504821	0.296863	128	166	3	12419	GPR37,KDELR3,VT1
GO:BP	inner ear receptor cell development	GO:0060119	0.504941	0.296759	28	166	2	12419	CLRN1,IFT27
GO:BP	multicellular organism reproduction	GO:0032504	0.504941	0.296759	307	166	8	12419	ASZ1,IFT27,LGR5,SPAM1,SYCE3,TTC26,TTLL1,WEE2
GO:BP	actin filament organization	GO:0007015	0.504941	0.296759	202	166	6	12419	BRAF,CLRN1,LMOD2,PDXP,TWF1,WASL
GO:MF	ion gated channel activity	GO:0022839	0.505521	0.29626	21	166	1	12419	KCNMB4
GO:BP	mRNA pseudouridine synthesis	GO:1990481	0.508047	0.294097	5	166	1	12419	PUS7
GO:BP	phosphatidylglycerol biosynthetic process	GO:0006655	0.508047	0.294097	5	166	1	12419	PLA2G6
GO:BP	tRNA metabolic process	GO:0006399	0.508047	0.294097	110	166	4	12419	DUS4L,PUS7,TPRKB,YARS2
GO:BP	'de novo' IMP biosynthetic process	GO:0006189	0.508047	0.294097	5	166	1	12419	ADSL
GO:BP	regulation of innate immune response	GO:0045088	0.508047	0.294097	67	166	3	12419	APPL2,POLR3B,TTLL12
GO:BP	formate metabolic process	GO:0015942	0.508047	0.294097	5	166	1	12419	HAL
GO:BP	positive regulation of cholesterol storage	GO:0010886	0.508047	0.294097	5	166	1	12419	SREBF2
GO:BP	cellular response to ethanol	GO:0071361	0.508047	0.294097	5	166	1	12419	ITPR2
GO:BP	induction of positive chemotaxis	GO:0050930	0.508047	0.294097	5	166	1	12419	NTF3
GO:BP	positive regulation of mitochondrion organization	GO:0010822	0.508047	0.294097	31	166	2	12419	FBXO7,MIEF1
GO:BP	negative regulation of fibroblast migration	GO:0010764	0.508047	0.294097	5	166	1	12419	BRAF
GO:BP	gamete generation	GO:0007276	0.508047	0.294097	258	166	7	12419	ASZ1,IFT27,LGR5,SYCE3,TTC26,TTLL1,WEE2
GO:BP	actin nucleation	GO:0045010	0.508047	0.294097	30	166	2	12419	LMOD2,WASL
GO:BP	NADH dehydrogenase complex assembly	GO:0010257	0.508047	0.294097	29	166	2	12419	NDUFA12,NDUFB2
GO:BP	plasma membrane organization	GO:0007009	0.508047	0.294097	68	166	3	12419	MICALL1,SPAM1,WASL
GO:BP	DNA replication, synthesis of RNA primer	GO:0006269	0.508047	0.294097	5	166	1	12419	HELB
GO:BP	cardiolipin metabolic process	GO:0032048	0.508047	0.294097	5	166	1	12419	PLA2G6
GO:BP	Wnt signaling pathway involved in midbrain dopaminergic neuron differentiation	GO:1904953	0.508047	0.294097	5	166	1	12419	WNT2
GO:BP	negative regulation of cholesterol efflux	GO:0090370	0.508047	0.294097	5	166	1	12419	SREBF2
GO:BP	inositol phosphate-mediated signaling	GO:0048016	0.508047	0.294097	30	166	2	12419	ITPR2,VT1
GO:BP	protein localization to nuclear envelope	GO:0090435	0.508047	0.294097	5	166	1	12419	INTS13
GO:BP	negative regulation of lymphocyte migration	GO:2000402	0.508047	0.294097	5	166	1	12419	WASL
GO:BP	locomotion involved in locomotory behavior	GO:0031987	0.508047	0.294097	5	166	1	12419	GPR37
GO:BP	maintenance of protein localization in endoplasmic reticulum	GO:0035437	0.508047	0.294097	5	166	1	12419	KDELR3
GO:BP	negative regulation of glucose import	GO:0046325	0.508047	0.294097	5	166	1	12419	APPL2
GO:BP	small nucleolar ribonucleoprotein complex assembly	GO:0000491	0.508047	0.294097	5	166	1	12419	SNU13
GO:BP	negative regulation of actin filament polymerization	GO:0030837	0.508047	0.294097	30	166	2	12419	LMOD2,TWF1
GO:BP	regulation of synaptic vesicle exocytosis	GO:2000300	0.508047	0.294097	29	166	2	12419	BRAF,CHRM2
GO:BP	phosphatidylcholine metabolic process	GO:0046470	0.508047	0.294097	31	166	2	12419	CHPT1,PLA2G6
GO:BP	N-terminal protein lipidation	GO:0006498	0.508047	0.294097	5	166	1	12419	MAP6D1
GO:BP	pointed-end actin filament capping	GO:0051694	0.508047	0.294097	5	166	1	12419	LMOD2
GO:BP	regulation of branching involved in lung morphogenesis	GO:0061046	0.508047	0.294097	5	166	1	12419	WNT2
GO:BP	histidine catabolic process	GO:0006548	0.508047	0.294097	5	166	1	12419	HAL
GO:BP	mitochondrial respiratory chain complex I assembly	GO:0032981	0.508047	0.294097	29	166	2	12419	NDUFA12,NDUFB2
GO:BP	AMP biosynthetic process	GO:0006167	0.508047	0.294097	5	166	1	12419	ADSL
GO:BP	tRNA threonylcarbamoyladenosine metabolic process	GO:0070525	0.508047	0.294097	5	166	1	12419	TPRKB
GO:BP	Fc receptor mediated stimulatory signaling pathway	GO:0002431	0.508047	0.294097	5	166	1	12419	APPL2
GO:BP	histidine metabolic process	GO:0006547	0.508047	0.294097	5	166	1	12419	HAL
GO:BP	protein-containing complex disassembly	GO:0032984	0.508047	0.294097	108	166	4	12419	LMOD2,MAP6D1,PDXP,TWF1
GO:BP	adiponectin-activated signaling pathway	GO:0033211	0.508047	0.294097	5	166	1	12419	APPL2
GO:BP	floor plate development	GO:0033504	0.508047	0.294097	5	166	1	12419	CBY1
GO:MF	anion binding	GO:0043168	0.512563	0.290252	1551	166	24	12419	ADCK2,APAF1,BRAF,CCT2,DMC1,DUS4L,FOXRED2,GCAT,IFT27,ITPR2,MCM5,MICALL1,MIEF1,PDE6H,PHYH,RASD2,RECQL,SEPTIN3,STK38L,TTLL1,TTLL12,TWF1,WEE2,YARS2
GO:MF	catalytic activity, acting on DNA	GO:0140097	0.512563	0.290252	191	166	4	12419	DMC1,HELB,MCM5,RECQL
GO:MF	Hsp70 protein binding	GO:0030544	0.515489	0.28778	22	166	1	12419	GPR37
GO:MF	snRNA binding	GO:0017069	0.515489	0.28778	22	166	1	12419	SNU13
GO:BP	actin filament-based process	GO:0030029	0.522466	0.281942	378	166	9	12419	BRAF,CELSR1,CLRN1,LMOD2,NTF3,PARVG,PDXP,TWF1,WASL
GO:BP	alpha-amino acid catabolic process	GO:1901606	0.523282	0.281264	32	166	2	12419	GCAT,PAH
GO:BP	icosanoid metabolic process	GO:0006690	0.523282	0.281264	32	166	2	12419	LTA4H,TBXAS1
GO:MF	tetrapyrrole binding	GO:0046906	0.524794	0.280011	75	166	2	12419	LOC100222415,TBXAS1
GO:MF	amino acid binding	GO:0016597	0.524794	0.280011	23	166	1	12419	YARS2
GO:MF	intramolecular oxidoreductase activity	GO:0016860	0.524794	0.280011	23	166	1	12419	TBXAS1
GO:MF	carboxypeptidase activity	GO:0004180	0.524794	0.280011	23	166	1	12419	CPM
GO:CC	A band	GO:0031672	0.525764	0.279209	12	166	1	12419	LMOD2
GO:CC	nuclear replisome	GO:0043601	0.525764	0.279209	12	166	1	12419	HELB
GO:CC	replisome	GO:0030894	0.525764	0.279209	12	166	1	12419	HELB
GO:MF	oxidoreductase activity	GO:0016491	0.528732	0.276764	458	166	8	12419	DUS4L,LOC100222415,NCF4,NDUFA12,PAH,PHYH,PYROXD1,TBXAS1
GO:MF	intramolecular transferase activity	GO:0016866	0.533478	0.272884	24	166	1	12419	PUS7
GO:MF	phosphatidylserine binding	GO:0001786	0.533478	0.272884	24	166	1	12419	APPL2
GO:MF	peptide hormone binding	GO:0017046	0.533478	0.272884	24	166	1	12419	VT1
GO:BP	peptidyl-methionine modification	GO:0018206	0.544199	0.264242	6	166	1	12419	METAP2
GO:BP	regulation of fertilization	GO:0080154	0.544199	0.264242	6	166	1	12419	WEE2
GO:BP	antibacterial humoral response	GO:0019731	0.544199	0.264242	6	166	1	12419	PLA2G6
GO:BP	aspartate family amino acid catabolic process	GO:0009068	0.544199	0.264242	6	166	1	12419	GCAT
GO:BP	regulation of pinocytosis	GO:0048548	0.544199	0.264242	6	166	1	12419	APPL2
GO:BP	transferrin transport	GO:0033572	0.544199	0.264242	6	166	1	12419	REP15
GO:BP	positive regulation of heterochromatin organization	GO:0120263	0.544199	0.264242	6	166	1	12419	PPHLN1
GO:BP	positive regulation of heterochromatin assembly	GO:0031453	0.544199	0.264242	6	166	1	12419	PPHLN1
GO:BP	inner ear development	GO:0048839	0.544199	0.264242	120	166	4	12419	CELSR1,CLRN1,IFT27,LGR5
GO:BP	tRNA processing	GO:0008033	0.544199	0.264242	72	166	3	12419	DUS4L,PUS7,TPRKB
GO:BP	negative regulation of fatty acid oxidation	GO:0046322	0.544199	0.264242	6	166	1	12419	APPL2
GO:BP	regulation of DNA methylation-dependent heterochromatin assembly	GO:0090308	0.544199	0.264242	6	166	1	12419	PPHLN1
GO:BP	cell proliferation in midbrain	GO:0033278	0.544199	0.264242	6	166	1	12419	WNT2
GO:BP	macropinocytosis	GO:0044351	0.544199	0.264242	6	166	1	12419	APPL2
GO:BP	epithelial cell proliferation involved in lung morphogenesis	GO:0060502	0.544199	0.264242	6	166	1	12419	WNT2
GO:BP	negative regulation of neurotransmitter secretion	GO:0046929	0.544199	0.264242	6	166	1	12419	BRAF
GO:BP	regulation of B cell receptor signaling pathway	GO:0050855	0.544199	0.264242	6	166	1	12419	NFAM1
GO:BP	positive regulation of autophagy of mitochondrion	GO:1903599	0.544199	0.264242	6	166	1	12419	FBXO7
GO:BP	DNA conformation change	GO:0071103	0.544199	0.264242	118	166	4	12419	HELB,MCM5,PPHLN1,RECQL
GO:BP	Fc receptor signaling pathway	GO:0038093	0.544199	0.264242	6	166	1	12419	APPL2
GO:BP	regulation of membrane tubulation	GO:1903525	0.544199	0.264242	6	166	1	12419	WASL
GO:BP	cellular response to ATP	GO:0071318	0.544199	0.264242	6	166	1	12419	PDXP
GO:BP	O-glycan processing	GO:0016266	0.544199	0.264242	6	166	1	12419	GXYLT1
GO:BP	dichotomous subdivision of an epithelial terminal unit	GO:0060600	0.544199	0.264242	6	166	1	12419	CELSR1
GO:BP	equilibrioception	GO:0050957	0.544199	0.264242	6	166	1	12419	CLRN1
GO:MF	RNA polymerase II transcription regulatory region sequence-specific DNA binding	GO:0000977	0.544763	0.263793	398	166	7	12419	CREB3L2,ELK3,NFYB,PRDM4,SREBF2,TRIM24,ZNF277
GO:BP	regulation of neurotransmitter secretion	GO:0046928	0.54915	0.260309	37	166	2	12419	BRAF,CHRM2
GO:BP	regulation of actin filament polymerization	GO:0030833	0.54915	0.260309	77	166	3	12419	LMOD2,TWF1,WASL
GO:BP	regulation of oxidative stress-induced cell death	GO:1903201	0.54915	0.260309	37	166	2	12419	FBXO7,GPR37
GO:BP	positive regulation of chromatin assembly or disassembly	GO:0045799	0.54915	0.260309	7	166	1	12419	PPHLN1
GO:BP	immune response-activating signal transduction	GO:0002757	0.54915	0.260309	77	166	3	12419	APPL2,BRAF,NFAM1
GO:BP	cytoskeleton organization	GO:0007010	0.54915	0.260309	694	166	14	12419	BRAF,CELSR1,CLRN1,INTS13,LMOD2,LOC100225408,MAP6D1,NTF3,PARVG,PDXP,TTC26,TTLL1,TWF1,WASL
GO:BP	regulation of cellular component size	GO:0032535	0.54915	0.260309	172	166	5	12419	IQGAP3,LMOD2,PDXP,TWF1,WASL
GO:BP	DNA-dependent DNA replication	GO:0006261	0.54915	0.260309	77	166	3	12419	HELB,MCM10,MCM5
GO:BP	immune response-activating cell surface receptor signaling pathway	GO:0002429	0.54915	0.260309	77	166	3	12419	APPL2,BRAF,NFAM1
GO:BP	reproductive process	GO:0022414	0.54915	0.260309	569	166	12	12419	ASZ1,CCT2,DMC1,IFT27,LGR5,SNU13,SPAM1,SYCE3,TTC26,TTLL1,WEE2,WNT2
GO:BP	negative regulation of neurotransmitter transport	GO:0051589	0.54915	0.260309	7	166	1	12419	BRAF
GO:BP	cellular response to hydrogen peroxide	GO:0070301	0.54915	0.260309	37	166	2	12419	GPR37,ZNF277
GO:BP	RNA localization to nucleus	GO:0090685	0.54915	0.260309	7	166	1	12419	CCT2
GO:BP	telomerase RNA localization	GO:0090672	0.54915	0.260309	7	166	1	12419	CCT2
GO:BP	telomerase RNA localization to Cajal body	GO:0090671	0.54915	0.260309	7	166	1	12419	CCT2
GO:BP	negative regulation of supramolecular fiber organization	GO:1902904	0.54915	0.260309	78	166	3	12419	LMOD2,MAP6D1,TWF1
GO:BP	positive regulation of MAPK cascade	GO:0043410	0.54915	0.260309	226	166	6	12419	BRAF,GPR37,IQGAP3,NTF3,PDE6H,TAB1
GO:BP	reproduction	GO:0000003	0.54915	0.260309	570	166	12	12419	ASZ1,CCT2,DMC1,IFT27,LGR5,SNU13,SPAM1,SYCE3,TTC26,TTLL1,WEE2,WNT2
GO:BP	planar cell polarity pathway involved in neural tube closure	GO:0090179	0.54915	0.260309	7	166	1	12419	CELSR1
GO:BP	lung morphogenesis	GO:0060425	0.54915	0.260309	36	166	2	12419	CELSR1,WNT2
GO:BP	RNA localization to Cajal body	GO:0090670	0.54915	0.260309	7	166	1	12419	CCT2
GO:BP	activation of MAPKKK activity	GO:0000185	0.54915	0.260309	7	166	1	12419	TAB1
GO:BP	leukotriene biosynthetic process	GO:0019370	0.54915	0.260309	7	166	1	12419	LTA4H
GO:BP	positive regulation of actin nucleation	GO:0051127	0.54915	0.260309	7	166	1	12419	WASL
GO:BP	regulation of cholesterol storage	GO:0010885	0.54915	0.260309	7	166	1	12419	SREBF2
GO:BP	actin filament polymerization	GO:0030041	0.54915	0.260309	79	166	3	12419	LMOD2,TWF1,WASL
GO:BP	apical protein localization	GO:0045176	0.54915	0.260309	7	166	1	12419	CELSR1
GO:BP	dopamine biosynthetic process	GO:0042416	0.54915	0.260309	7	166	1	12419	GPR37
GO:BP	regulation of Arp2/3 complex-mediated actin nucleation	GO:0034315	0.54915	0.260309	7	166	1	12419	WASL
GO:BP	protein targeting to membrane	GO:0006612	0.54915	0.260309	36	166	2	12419	MICALL1,MIEF1
GO:BP	G protein-coupled acetylcholine receptor signaling pathway	GO:0007213	0.54915	0.260309	7	166	1	12419	CHRM2
GO:BP	activation of protein kinase activity	GO:0032147	0.54915	0.260309	122	166	4	12419	IQGAP3,NTF3,PDE6H,TAB1
GO:BP	positive regulation of mammary gland epithelial cell proliferation	GO:0033601	0.54915	0.260309	7	166	1	12419	IQGAP3
GO:BP	microtubule-based transport	GO:0099111	0.54915	0.260309	79	166	3	12419	IFT27,TTC26,TTLL1
GO:BP	cellular localization	GO:0051641	0.54915	0.260309	1400	166	25	12419	APPL2,BRAF,C1AH12ORF66,CCT2,CELSR1,CHRM2,CREB3L2,FBXO7,IFT27,INTS13,KDELR3,LOC105759175,MICALL1,MIEF1,PHETA2,PLA2G6,PPHLN1,RINT1,SAMM50,TOM1,TOMM22,TSPO,TTC26,TWF1,WASL
GO:BP	regulation of telomerase RNA localization to Cajal body	GO:1904872	0.54915	0.260309	7	166	1	12419	CCT2
GO:BP	diet induced thermogenesis	GO:0002024	0.54915	0.260309	7	166	1	12419	APPL2
GO:BP	regulation of dopamine metabolic process	GO:0042053	0.54915	0.260309	7	166	1	12419	GPR37
GO:BP	regulation of hematopoietic stem cell differentiation	GO:1902036	0.54915	0.260309	7	166	1	12419	PUS7
GO:BP	regulation of lymphocyte differentiation	GO:0045619	0.54915	0.260309	78	166	3	12419	BRAF,FBXO7,NFAM1
GO:BP	regulation of catecholamine metabolic process	GO:0042069	0.54915	0.260309	7	166	1	12419	GPR37
GO:BP	spermatogenesis	GO:0007283	0.550837	0.258977	178	166	5	12419	ASZ1,IFT27,SYCE3,TTC26,TTLL1
GO:MF	molecular transducer activity	GO:0060089	0.553618	0.25679	611	166	10	12419	CELSR1,CHRM2,GPR37,GPR85,IL2RB,LGR5,NFAM1,SSTR3,VT1,WEE2
GO:MF	UDP-glycosyltransferase activity	GO:0008194	0.553618	0.25679	83	166	2	12419	GXYLT1,RXYLT1
GO:MF	G protein-coupled amine receptor activity	GO:0008227	0.553618	0.25679	27	166	1	12419	CHRM2
GO:MF	growth factor activity	GO:0008083	0.553618	0.25679	81	166	2	12419	FGF6,NTF3
GO:MF	rRNA binding	GO:0019843	0.553618	0.25679	27	166	1	12419	LOC105758589
GO:MF	guanyl ribonucleotide binding	GO:0032561	0.553618	0.25679	269	166	5	12419	IFT27,MIEF1,PDE6H,RASD2,SEPTIN3
GO:MF	vitamin binding	GO:0019842	0.553618	0.25679	83	166	2	12419	GCAT,PHYH
GO:MF	signaling receptor activity	GO:0038023	0.553618	0.25679	611	166	10	12419	CELSR1,CHRM2,GPR37,GPR85,IL2RB,LGR5,NFAM1,SSTR3,VT1,WEE2
GO:MF	thiolester hydrolase activity	GO:0016790	0.553618	0.25679	26	166	1	12419	PLA2G6
GO:MF	monosaccharide binding	GO:0048029	0.553618	0.25679	27	166	1	12419	PHYH
GO:MF	guanyl nucleotide binding	GO:0019001	0.553618	0.25679	274	166	5	12419	IFT27,MIEF1,PDE6H,RASD2,SEPTIN3
GO:MF	ligase activity, forming carbon-sulfur bonds	GO:0016877	0.553618	0.25679	26	166	1	12419	ACSS3
GO:BP	negative regulation of protein polymerization	GO:0032272	0.55445	0.256137	38	166	2	12419	LMOD2,TWF1
GO:BP	negative regulation of cytoskeleton organization	GO:0051494	0.554493	0.256104	80	166	3	12419	LMOD2,MAP6D1,TWF1
GO:BP	germ cell development	GO:0007281	0.55616	0.2548	128	166	4	12419	LGR5,TTC26,TTLL1,WEE2
GO:BP	cellular response to oxidative stress	GO:0034599	0.55616	0.2548	128	166	4	12419	FBXO7,GPR37,PYROXD1,ZNF277
GO:BP	positive regulation of G protein-coupled receptor signaling pathway	GO:0045745	0.556746	0.254343	8	166	1	12419	PDE6H
GO:BP	lateral sprouting from an epithelium	GO:0060601	0.556746	0.254343	8	166	1	12419	CELSR1
GO:BP	2-oxoglutarate metabolic process	GO:0006103	0.556746	0.254343	8	166	1	12419	PHYH
GO:BP	histone H2A acetylation	GO:0043968	0.556746	0.254343	8	166	1	12419	YEATS4
GO:BP	pentose metabolic process	GO:0019321	0.556746	0.254343	8	166	1	12419	OTOGL
GO:BP	regulation of ER to Golgi vesicle-mediated transport	GO:0060628	0.556746	0.254343	8	166	1	12419	RINT1
GO:BP	respiratory chain complex III assembly	GO:0017062	0.556746	0.254343	8	166	1	12419	C1AH12ORF73
GO:BP	ether lipid biosynthetic process	GO:0008611	0.556746	0.254343	8	166	1	12419	CHPT1
GO:BP	cerebellar Purkinje cell differentiation	GO:0021702	0.556746	0.254343	8	166	1	12419	TTLL1
GO:BP	regulation of protein serine/threonine kinase activity	GO:0071900	0.556746	0.254343	235	166	6	12419	FBXO7,IQGAP3,NTF3,PDE6H,TAB1,WEE2
GO:BP	negative regulation of glucose transmembrane transport	GO:0010829	0.556746	0.254343	8	166	1	12419	APPL2
GO:BP	negative regulation of sterol transport	GO:0032372	0.556746	0.254343	8	166	1	12419	SREBF2
GO:BP	cellular lipid biosynthetic process	GO:0097384	0.556746	0.254343	8	166	1	12419	CHPT1
GO:BP	positive regulation of establishment of protein localization to telomere	GO:1904851	0.556746	0.254343	8	166	1	12419	CCT2
GO:BP	DNA methylation-dependent heterochromatin assembly	GO:0006346	0.556746	0.254343	8	166	1	12419	PPHLN1
GO:BP	immune response-regulating signaling pathway	GO:0002764	0.556746	0.254343	83	166	3	12419	APPL2,BRAF,NFAM1
GO:BP	positive regulation of positive chemotaxis	GO:0050927	0.556746	0.254343	8	166	1	12419	NTF3
GO:BP	mitochondrial respiratory chain complex III assembly	GO:0034551	0.556746	0.254343	8	166	1	12419	C1AH12ORF73
GO:BP	negative regulation of regulated secretory pathway	GO:1903306	0.556746	0.254343	8	166	1	12419	BRAF
GO:BP	regulation of establishment of planar polarity involved in neural tube closure	GO:0090178	0.556746	0.254343	8	166	1	12419	CELSR1
GO:BP	piRNA metabolic process	GO:0034587	0.556746	0.254343	8	166	1	12419	ASZ1
GO:BP	leukotriene metabolic process	GO:0006691	0.556746	0.254343	8	166	1	12419	LTA4H
GO:BP	positive regulation of cellular component organization	GO:0051130	0.556746	0.254343	530	166	11	12419	APPL2,BRAF,CCT2,CLRN1,FBXO7,LMOD2,MIEF1,NTF3,PDXP,PPHLN1,WASL
GO:BP	negative regulation of cholesterol transport	GO:0032375	0.556746	0.254343	8	166	1	12419	SREBF2
GO:BP	glycerol ether biosynthetic process	GO:0046504	0.556746	0.254343	8	166	1	12419	CHPT1
GO:BP	acetylcholine receptor signaling pathway	GO:0095500	0.556746	0.254343	8	166	1	12419	CHRM2
GO:BP	DNA methylation involved in gamete generation	GO:0043046	0.556746	0.254343	8	166	1	12419	ASZ1
GO:BP	protein O-linked glycosylation	GO:0006493	0.556746	0.254343	40	166	2	12419	GXYLT1,RXYLT1
GO:BP	establishment of planar polarity involved in neural tube closure	GO:0090177	0.556746	0.254343	8	166	1	12419	CELSR1
GO:BP	positive regulation of actin filament depolymerization	GO:0030836	0.556746	0.254343	8	166	1	12419	PDXP
GO:BP	RNA localization	GO:0006403	0.556746	0.254343	81	166	3	12419	CCT2,LOC105758589,LOC105759175
GO:BP	immune response-regulating cell surface receptor signaling pathway	GO:0002768	0.556746	0.254343	81	166	3	12419	APPL2,BRAF,NFAM1
GO:BP	protein polyglutamylation	GO:0018095	0.556746	0.254343	8	166	1	12419	TTLL1
GO:BP	axoneme assembly	GO:0035082	0.55712	0.254052	41	166	2	12419	TTC26,TTLL1
GO:BP	inner ear receptor cell differentiation	GO:0060113	0.55712	0.254052	41	166	2	12419	CLRN1,IFT27
GO:BP	regulation of neurotransmitter transport	GO:0051588	0.55712	0.254052	41	166	2	12419	BRAF,CHRM2
GO:BP	response to organophosphorus	GO:0046683	0.55712	0.254052	41	166	2	12419	ITPR2,PDXP
GO:BP	regulation of cellular response to oxidative stress	GO:1900407	0.55712	0.254052	41	166	2	12419	FBXO7,GPR37
GO:BP	positive regulation of endocytosis	GO:0045807	0.55712	0.254052	41	166	2	12419	APPL2,NTF3
GO:MF	myosin binding	GO:0017022	0.557674	0.253619	28	166	1	12419	IQGAP3
GO:MF	phosphatidylinositol-3-phosphate binding	GO:0032266	0.557674	0.253619	28	166	1	12419	NCF4
GO:MF	magnesium ion binding	GO:0000287	0.557674	0.253619	147	166	3	12419	PDXP,STK38L,WEE2
GO:MF	small molecule binding	GO:0036094	0.557674	0.253619	1608	166	24	12419	ADCK2,APAF1,BRAF,CCT2,DMC1,DUS4L,FOXRED2,GCAT,IFT27,ITPR2,MCM5,MIEF1,PDE6H,PHYH,POLR3B,RASD2,RECQL,SEPTIN3,STK38L,TTLL1,TTLL12,TWF1,WEE2,YARS2
GO:MF	clathrin binding	GO:0030276	0.557674	0.253619	28	166	1	12419	TOM1
GO:MF	transition metal ion binding	GO:0046914	0.559646	0.252087	621	166	10	12419	CPM,LOC100222415,LOC101234089,LTA4H,PAH,PHYH,TBXAS1,TRIM24,XPNPEP3,ZCRB1
GO:MF	catalytic activity, acting on a tRNA	GO:0140101	0.559646	0.252087	86	166	2	12419	DUS4L,YARS2
GO:MF	protein tyrosine kinase activity	GO:0004713	0.559646	0.252087	86	166	2	12419	TWF1,WEE2
GO:BP	regulation of cell maturation	GO:1903429	0.563509	0.249099	9	166	1	12419	WEE2
GO:BP	Golgi vesicle transport	GO:0048193	0.563509	0.249099	137	166	4	12419	COG5,CREB3L2,KDELR3,RINT1
GO:BP	CD4-positive or CD8-positive, alpha-beta T cell lineage commitment	GO:0043369	0.563509	0.249099	9	166	1	12419	BRAF
GO:BP	positive regulation of antigen receptor-mediated signaling pathway	GO:0050857	0.563509	0.249099	9	166	1	12419	NFAM1
GO:BP	mammary gland epithelium development	GO:0061180	0.563509	0.249099	42	166	2	12419	IQGAP3,WNT2
GO:BP	barbed-end actin filament capping	GO:0051016	0.563509	0.249099	9	166	1	12419	TWF1
GO:BP	glycolipid catabolic process	GO:0019377	0.563509	0.249099	9	166	1	12419	NAGA
GO:BP	response to acetylcholine	GO:1905144	0.563509	0.249099	9	166	1	12419	CHRM2
GO:BP	aromatic amino acid family catabolic process	GO:0009074	0.563509	0.249099	9	166	1	12419	PAH
GO:BP	male gamete generation	GO:0048232	0.563509	0.249099	190	166	5	12419	ASZ1,IFT27,SYCE3,TTC26,TTLL1
GO:BP	multicellular organismal reproductive process	GO:0048609	0.563509	0.249099	304	166	7	12419	ASZ1,IFT27,LGR5,SYCE3,TTC26,TTLL1,WEE2
GO:BP	regulation of positive chemotaxis	GO:0050926	0.563509	0.249099	9	166	1	12419	NTF3
GO:BP	cerebellar Purkinje cell layer formation	GO:0021694	0.563509	0.249099	9	166	1	12419	TTLL1
GO:BP	intra-Golgi vesicle-mediated transport	GO:0006891	0.563509	0.249099	9	166	1	12419	COG5
GO:BP	midbrain dopaminergic neuron differentiation	GO:1904948	0.563509	0.249099	9	166	1	12419	WNT2
GO:BP	regulation of establishment of protein localization to telomere	GO:0070203	0.563509	0.249099	9	166	1	12419	CCT2
GO:BP	cholesterol storage	GO:0010878	0.563509	0.249099	9	166	1	12419	SREBF2
GO:BP	oogenesis	GO:0048477	0.563509	0.249099	42	166	2	12419	LGR5,WEE2
GO:BP	regulation of establishment of protein localization to chromosome	GO:0070202	0.563509	0.249099	9	166	1	12419	CCT2
GO:BP	positive regulation of actin cytoskeleton reorganization	GO:2000251	0.563509	0.249099	9	166	1	12419	NTF3
GO:BP	positive regulation of protein serine/threonine kinase activity	GO:0071902	0.563509	0.249099	137	166	4	12419	IQGAP3,NTF3,PDE6H,TAB1
GO:BP	negative regulation of mononuclear cell migration	GO:0071676	0.563509	0.249099	9	166	1	12419	WASL
GO:BP	G1/S transition of mitotic cell cycle	GO:0000082	0.563509	0.249099	87	166	3	12419	APPL2,FBXO7,IQGAP3
GO:BP	DNA replication	GO:0006260	0.563509	0.249099	137	166	4	12419	HELB,MCM10,MCM5,WEE2
GO:BP	dicarboxylic acid metabolic process	GO:0043648	0.563509	0.249099	42	166	2	12419	HAL,PHYH
GO:BP	establishment of planar polarity of embryonic epithelium	GO:0042249	0.563509	0.249099	9	166	1	12419	CELSR1
GO:BP	ether biosynthetic process	GO:1901503	0.563509	0.249099	9	166	1	12419	CHPT1
GO:BP	ear development	GO:0043583	0.563509	0.249099	137	166	4	12419	CELSR1,CLRN1,IFT27,LGR5
GO:BP	IMP biosynthetic process	GO:0006188	0.563509	0.249099	9	166	1	12419	ADSL
GO:BP	cellular response to acetylcholine	GO:1905145	0.563509	0.249099	9	166	1	12419	CHRM2
GO:BP	positive regulation of protein localization to chromosome, telomeric region	GO:1904816	0.563509	0.249099	9	166	1	12419	CCT2
GO:CC	sno(s)RNA-containing ribonucleoprotein complex	GO:0005732	0.564189	0.248576	14	166	1	12419	SNU13
GO:CC	trans-Golgi network transport vesicle	GO:0030140	0.564189	0.248576	14	166	1	12419	CLRN1
GO:CC	nuclear replication fork	GO:0043596	0.564189	0.248576	14	166	1	12419	HELB
GO:CC	mitochondrial envelope	GO:0005740	0.564189	0.248576	279	166	6	12419	C1AH12ORF73,MIEF1,NDUFA12,NDUFB2,SAMM50,TOMM22
GO:CC	plasma membrane bounded cell projection	GO:0120025	0.564189	0.248576	850	166	15	12419	APPL2,BRAF,CBY1,CLRN1,FBXO7,IFT27,PDXP,PHYH,PICK1,PVALB,SSTR3,TTC26,TTLL1,TWF1,WASL
GO:CC	endocytic vesicle membrane	GO:0030666	0.564189	0.248576	14	166	1	12419	APPL2
GO:BP	regulation of toll-like receptor 4 signaling pathway	GO:0034143	0.573735	0.241289	10	166	1	12419	APPL2
GO:BP	positive regulation of actin filament polymerization	GO:0030838	0.573735	0.241289	45	166	2	12419	LMOD2,WASL
GO:BP	response to purine-containing compound	GO:0014074	0.573735	0.241289	45	166	2	12419	ITPR2,PDXP
GO:BP	neuronal action potential	GO:0019228	0.573735	0.241289	10	166	1	12419	KCNMB4
GO:BP	cellular response to hepatocyte growth factor stimulus	GO:0035729	0.573735	0.241289	10	166	1	12419	APPL2
GO:BP	response to hepatocyte growth factor	GO:0035728	0.573735	0.241289	10	166	1	12419	APPL2
GO:BP	negative regulation of hydrogen peroxide-induced cell death	GO:1903206	0.573735	0.241289	10	166	1	12419	GPR37
GO:BP	organelle disassembly	GO:1903008	0.573735	0.241289	46	166	2	12419	FBXO7,TSPO
GO:BP	phosphatidylcholine catabolic process	GO:0034638	0.573735	0.241289	10	166	1	12419	PLA2G6
GO:BP	cellular protein-containing complex assembly	GO:0034622	0.573735	0.241289	432	166	9	12419	C1AH12ORF73,CCT2,LMOD2,NDUFA12,NDUFB2,SAMM50,SNU13,TWF1,WASL
GO:BP	synaptic vesicle exocytosis	GO:0016079	0.573735	0.241289	45	166	2	12419	BRAF,CHRM2
GO:BP	negative regulation of response to reactive oxygen species	GO:1901032	0.573735	0.241289	10	166	1	12419	GPR37
GO:BP	positive regulation of cardiac muscle hypertrophy	GO:0010613	0.573735	0.241289	10	166	1	12419	TWF1
GO:BP	regulation of plasma membrane organization	GO:1903729	0.573735	0.241289	10	166	1	12419	WASL
GO:BP	organelle fission	GO:0048285	0.573735	0.241289	253	166	6	12419	ASZ1,DMC1,MIEF1,PDXP,SYCE3,WEE2
GO:BP	G protein-coupled receptor signaling pathway	GO:0007186	0.573735	0.241289	430	166	9	12419	CELSR1,CHRM2,GPR37,GPR85,LGR5,PDE6H,PICK1,SSTR3,VT1
GO:BP	mitochondrial membrane organization	GO:0007006	0.573735	0.241289	45	166	2	12419	SAMM50,TOMM22
GO:BP	protein localization	GO:0008104	0.573735	0.241289	1200	166	21	12419	APPL2,C1AH12ORF66,CCT2,CELSR1,FBXO7,IFT27,INTS13,KDELR3,MICALL1,MIEF1,PICK1,PLA2G6,PPHLN1,REP15,SAMM50,TOM1,TOMM22,TSPO,TTC26,TWF1,WASL
GO:BP	establishment of protein localization	GO:0045184	0.573735	0.241289	738	166	14	12419	APPL2,CCT2,FBXO7,IFT27,KDELR3,MICALL1,MIEF1,PICK1,PLA2G6,REP15,SAMM50,TOM1,TOMM22,TSPO
GO:BP	AMP metabolic process	GO:0046033	0.573735	0.241289	10	166	1	12419	ADSL
GO:BP	oxoacid metabolic process	GO:0043436	0.573735	0.241289	430	166	9	12419	APPL2,CMAS,GCAT,HAL,LTA4H,PAH,PHYH,TBXAS1,YARS2
GO:BP	aldehyde catabolic process	GO:0046185	0.573735	0.241289	10	166	1	12419	PDXP
GO:BP	regulation of cyclin-dependent protein serine/threonine kinase activity	GO:0000079	0.573735	0.241289	46	166	2	12419	FBXO7,WEE2
GO:BP	negative regulation of cytokine production involved in inflammatory response	GO:1900016	0.573735	0.241289	10	166	1	12419	APPL2
GO:BP	synaptonemal complex organization	GO:0070193	0.573735	0.241289	10	166	1	12419	SYCE3
GO:BP	regulation of heterochromatin assembly	GO:0031445	0.573735	0.241289	10	166	1	12419	PPHLN1
GO:BP	renal filtration	GO:0097205	0.573735	0.241289	10	166	1	12419	XPNPEP3
GO:BP	synaptonemal complex assembly	GO:0007130	0.573735	0.241289	10	166	1	12419	SYCE3
GO:BP	negative regulation of type I interferon-mediated signaling pathway	GO:0060339	0.573735	0.241289	10	166	1	12419	TTLL12
GO:BP	mechanoreceptor differentiation	GO:0042490	0.573735	0.241289	44	166	2	12419	CLRN1,IFT27
GO:BP	glomerular filtration	GO:0003094	0.573735	0.241289	10	166	1	12419	XPNPEP3
GO:BP	regulation of heterochromatin organization	GO:0120261	0.573735	0.241289	10	166	1	12419	PPHLN1
GO:BP	carboxylic acid metabolic process	GO:0019752	0.573735	0.241289	427	166	9	12419	APPL2,CMAS,GCAT,HAL,LTA4H,PAH,PHYH,TBXAS1,YARS2
GO:CC	U4/U6 x U5 tri-snRNP complex	GO:0046540	0.574473	0.24073	15	166	1	12419	SNU13
GO:CC	U12-type spliceosomal complex	GO:0005689	0.574473	0.24073	15	166	1	12419	ZCRB1
GO:CC	spliceosomal tri-snRNP complex	GO:0097526	0.574473	0.24073	15	166	1	12419	SNU13
GO:CC	trans-Golgi network membrane	GO:0032588	0.574473	0.24073	15	166	1	12419	LGR5
GO:MF	non-membrane spanning protein tyrosine kinase activity	GO:0004715	0.574539	0.24068	30	166	1	12419	WEE2
GO:MF	E-box binding	GO:0070888	0.574539	0.24068	30	166	1	12419	SREBF2
GO:MF	scavenger receptor activity	GO:0005044	0.574539	0.24068	30	166	1	12419	STAB2
GO:MF	binding	GO:0005488	0.57605	0.23954	7692	166	106	12419	ADCK2,ADSL,APAF1,APPL2,ASCL4,ASZ1,BRAF,C1QTNF6,CCT2,CELSR1,CPM,CREB3L2,DBX2,DMC1,DUS4L,ELK3,FBXO7,FGF6,FOXRED2,GCAT,GPR37,GRAP2,HELB,HMGA2,IAPP,IFT27,IL2RB,IQGAP3,ITPR2,KDELR3,LGR5,LMOD2,LOC100218635,LOC100218691,LOC100220543,LOC100221944,LOC100222415,LOC100222446,LOC100224417,LOC100224455,LOC100225408,LOC101234089,LOC105758589,LOC105759175,LTA4H,MAP6D1,MCM10,MCM5,METAP2,MICALL1,MIEF1,MTERF2,NAGA…
GO:BP	alpha-amino acid metabolic process	GO:1901605	0.586947	0.231401	96	166	3	12419	GCAT,HAL,PAH
GO:BP	morphogenesis of an epithelial bud	GO:0060572	0.586947	0.231401	11	166	1	12419	WNT2
GO:BP	cerebellar Purkinje cell layer morphogenesis	GO:0021692	0.586947	0.231401	11	166	1	12419	TTLL1
GO:BP	postsynaptic signal transduction	GO:0098926	0.586947	0.231401	11	166	1	12419	CHRM2
GO:BP	auditory receptor cell stereocilium organization	GO:0060088	0.586947	0.231401	11	166	1	12419	CLRN1
GO:BP	DNA recombination	GO:0006310	0.586947	0.231401	146	166	4	12419	DMC1,HELB,RECQL,SYCE3
GO:BP	positive regulation of protein depolymerization	GO:1901881	0.586947	0.231401	11	166	1	12419	PDXP
GO:BP	macromolecule localization	GO:0033036	0.586947	0.231401	1421	166	24	12419	APPL2,C1AH12ORF66,CCT2,CELSR1,FBXO7,IFT27,INTS13,KDELR3,LOC105758589,LOC105759175,MICALL1,MIEF1,PICK1,PLA2G6,PPHLN1,REP15,SAMM50,SREBF2,TOM1,TOMM22,TSPO,TTC26,TWF1,WASL
GO:BP	antimicrobial humoral response	GO:0019730	0.586947	0.231401	11	166	1	12419	PLA2G6
GO:BP	epithelial cilium movement involved in extracellular fluid movement	GO:0003351	0.586947	0.231401	11	166	1	12419	TTLL1
GO:BP	response to hydrogen peroxide	GO:0042542	0.586947	0.231401	47	166	2	12419	GPR37,ZNF277
GO:BP	receptor metabolic process	GO:0043112	0.586947	0.231401	96	166	3	12419	NTF3,PHETA2,REP15
GO:BP	intracellular transport	GO:0046907	0.586947	0.231401	694	166	13	12419	APPL2,CREB3L2,FBXO7,IFT27,LOC105759175,MICALL1,MIEF1,PHETA2,RINT1,SAMM50,TOM1,TOMM22,TTC26
GO:BP	DNA double-strand break processing	GO:0000729	0.586947	0.231401	11	166	1	12419	HELB
GO:BP	cellular response to low-density lipoprotein particle stimulus	GO:0071404	0.586947	0.231401	11	166	1	12419	SREBF2
GO:BP	regulation of response to oxidative stress	GO:1902882	0.586947	0.231401	48	166	2	12419	FBXO7,GPR37
GO:BP	catecholamine biosynthetic process	GO:0042423	0.586947	0.231401	11	166	1	12419	GPR37
GO:BP	catechol-containing compound biosynthetic process	GO:0009713	0.586947	0.231401	11	166	1	12419	GPR37
GO:BP	regulation of MAP kinase activity	GO:0043405	0.586947	0.231401	146	166	4	12419	IQGAP3,NTF3,PDE6H,TAB1
GO:BP	pinocytosis	GO:0006907	0.586947	0.231401	11	166	1	12419	APPL2
GO:BP	regulation of protein localization to chromosome, telomeric region	GO:1904814	0.586947	0.231401	11	166	1	12419	CCT2
GO:BP	cellular response to estrogen stimulus	GO:0071391	0.586947	0.231401	11	166	1	12419	TRIM24
GO:BP	negative regulation of TORC1 signaling	GO:1904262	0.586947	0.231401	11	166	1	12419	C1AH12ORF66
GO:BP	cell death in response to oxidative stress	GO:0036473	0.586947	0.231401	48	166	2	12419	FBXO7,GPR37
GO:BP	positive regulation of muscle hypertrophy	GO:0014742	0.586947	0.231401	11	166	1	12419	TWF1
GO:BP	phosphatidylcholine biosynthetic process	GO:0006656	0.586947	0.231401	11	166	1	12419	CHPT1
GO:BP	cell cycle G1/S phase transition	GO:0044843	0.586947	0.231401	94	166	3	12419	APPL2,FBXO7,IQGAP3
GO:BP	IMP metabolic process	GO:0046040	0.586947	0.231401	11	166	1	12419	ADSL
GO:BP	phosphatidylglycerol metabolic process	GO:0046471	0.586947	0.231401	11	166	1	12419	PLA2G6
GO:BP	regulation of cyclin-dependent protein kinase activity	GO:1904029	0.59128	0.228207	49	166	2	12419	FBXO7,WEE2
GO:BP	regulation of regulated secretory pathway	GO:1903305	0.59128	0.228207	49	166	2	12419	BRAF,CHRM2
GO:CC	DNA-directed RNA polymerase complex	GO:0000428	0.591327	0.228172	61	166	2	12419	POLR3B,POLR3H
GO:CC	sperm midpiece	GO:0097225	0.591327	0.228172	16	166	1	12419	IFT27
GO:CC	nuclear DNA-directed RNA polymerase complex	GO:0055029	0.591327	0.228172	61	166	2	12419	POLR3B,POLR3H
GO:CC	intracellular membrane-bounded organelle	GO:0043231	0.591327	0.228172	5619	166	81	12419	ACSS3,APPL2,BRAF,C1AH12ORF66,C1AH12ORF73,CCDC107,CLRN1,COG5,CREB3L2,DMC1,ELK3,FBXO7,FOXRED2,GCAT,GPR37,GPR85,GRAP2,HELB,HMGA2,INTS13,ITPR2,KDELR3,LGR5,LOC100218635,LOC100218691,LOC100220543,LOC100221944,LOC100224417,LOC100229115,LOC105758589,LTA4H,MAP6D1,MCM10,MCM5,MED21,MICALL1,MIEF1,MTERF2,NAGA,NCF4,NDUFA12,NDUFB2,NFYB,NUP37,PHETA2,PHLDA1,PHYH,PMCH,POLR3B,POLR3H,PPHLN1,PRDM4,PUS7,PYROXD1,RECQL,…
GO:CC	endosome membrane	GO:0010008	0.591327	0.228172	172	166	4	12419	APPL2,MICALL1,NCF4,REP15
GO:BP	protein import	GO:0017038	0.594573	0.225795	97	166	3	12419	APPL2,SAMM50,TOMM22
GO:CC	cell projection	GO:0042995	0.594935	0.22553	883	166	15	12419	APPL2,BRAF,CBY1,CLRN1,FBXO7,IFT27,PDXP,PHYH,PICK1,PVALB,SSTR3,TTC26,TTLL1,TWF1,WASL
GO:CC	RNA polymerase complex	GO:0030880	0.594935	0.22553	63	166	2	12419	POLR3B,POLR3H
GO:CC	endoplasmic reticulum	GO:0005783	0.594935	0.22553	751	166	13	12419	CCDC107,CREB3L2,FOXRED2,GPR37,GPR85,ITPR2,KDELR3,RINT1,SLC37A3,SREBF2,TBXAS1,TMEM117,VWF
GO:BP	organic acid metabolic process	GO:0006082	0.595484	0.22513	446	166	9	12419	APPL2,CMAS,GCAT,HAL,LTA4H,PAH,PHYH,TBXAS1,YARS2
GO:BP	establishment of protein localization to telomere	GO:0070200	0.595484	0.22513	12	166	1	12419	CCT2
GO:BP	positive regulation of protein targeting to membrane	GO:0090314	0.595484	0.22513	12	166	1	12419	MIEF1
GO:BP	activation of protein kinase B activity	GO:0032148	0.595484	0.22513	12	166	1	12419	NTF3
GO:BP	positive regulation of insulin secretion involved in cellular response to glucose stimulus	GO:0035774	0.595484	0.22513	12	166	1	12419	PLA2G6
GO:BP	regulation of cellular amine metabolic process	GO:0033238	0.595484	0.22513	12	166	1	12419	GPR37
GO:BP	binding of sperm to zona pellucida	GO:0007339	0.595484	0.22513	12	166	1	12419	CCT2
GO:BP	negative regulation of neural precursor cell proliferation	GO:2000178	0.595484	0.22513	12	166	1	12419	APPL2
GO:BP	negative regulation of double-strand break repair via homologous recombination	GO:2000042	0.595484	0.22513	12	166	1	12419	HELB
GO:BP	RNA modification	GO:0009451	0.595484	0.22513	99	166	3	12419	DUS4L,PUS7,TPRKB
GO:BP	ether lipid metabolic process	GO:0046485	0.595484	0.22513	12	166	1	12419	CHPT1
GO:BP	defense response to bacterium	GO:0042742	0.595484	0.22513	51	166	2	12419	PLA2G6,STAB2
GO:BP	superoxide anion generation	GO:0042554	0.595484	0.22513	12	166	1	12419	NCF4
GO:BP	endoplasmic reticulum to Golgi vesicle-mediated transport	GO:0006888	0.595484	0.22513	50	166	2	12419	CREB3L2,RINT1
GO:BP	intracellular protein transport	GO:0006886	0.595484	0.22513	387	166	8	12419	APPL2,FBXO7,IFT27,MICALL1,MIEF1,SAMM50,TOM1,TOMM22
GO:BP	oocyte maturation	GO:0001556	0.595484	0.22513	12	166	1	12419	WEE2
GO:BP	regulation of chromatin assembly	GO:0010847	0.595484	0.22513	12	166	1	12419	PPHLN1
GO:BP	'de novo' posttranslational protein folding	GO:0051084	0.595484	0.22513	12	166	1	12419	CCT2
GO:BP	regulation of actin nucleation	GO:0051125	0.595484	0.22513	12	166	1	12419	WASL
GO:BP	protein O-linked mannosylation	GO:0035269	0.595484	0.22513	12	166	1	12419	RXYLT1
GO:BP	cellular protein-containing complex localization	GO:0034629	0.595484	0.22513	12	166	1	12419	WASL
GO:BP	hair follicle development	GO:0001942	0.595484	0.22513	51	166	2	12419	CELSR1,LGR5
GO:BP	synaptic transmission, dopaminergic	GO:0001963	0.595484	0.22513	12	166	1	12419	RASD2
GO:BP	regulation of mammary gland epithelial cell proliferation	GO:0033599	0.595484	0.22513	12	166	1	12419	IQGAP3
GO:BP	T cell lineage commitment	GO:0002360	0.595484	0.22513	12	166	1	12419	BRAF
GO:BP	fatty acid oxidation	GO:0019395	0.595484	0.22513	50	166	2	12419	APPL2,PHYH
GO:BP	cellular response to chemical stress	GO:0062197	0.595484	0.22513	150	166	4	12419	FBXO7,GPR37,PYROXD1,ZNF277
GO:BP	positive regulation of mitochondrial fission	GO:0090141	0.595484	0.22513	12	166	1	12419	MIEF1
GO:MF	2-oxoglutarate-dependent dioxygenase activity	GO:0016706	0.597386	0.223745	32	166	1	12419	PHYH
GO:MF	GDP binding	GO:0019003	0.597386	0.223745	32	166	1	12419	MIEF1
GO:BP	cellular amino acid metabolic process	GO:0006520	0.602637	0.219944	154	166	4	12419	GCAT,HAL,PAH,YARS2
GO:CC	mitochondrial protein-containing complex	GO:0098798	0.6041	0.218891	121	166	3	12419	NDUFB2,SAMM50,TOMM22
GO:CC	integral component of endoplasmic reticulum membrane	GO:0030176	0.6041	0.218891	66	166	2	12419	SLC37A3,SREBF2
GO:CC	NADH dehydrogenase complex	GO:0030964	0.6041	0.218891	19	166	1	12419	NDUFB2
GO:CC	chaperone complex	GO:0101031	0.6041	0.218891	18	166	1	12419	CCT2
GO:CC	sarcoplasmic reticulum	GO:0016529	0.6041	0.218891	19	166	1	12419	ITPR2
GO:CC	endomembrane system	GO:0012505	0.6041	0.218891	1875	166	29	12419	APPL2,CCDC107,CLRN1,COG5,CREB3L2,FOXRED2,GPR37,GPR85,GRAP2,ITPR2,KDELR3,LGR5,LOC100229115,MAP6D1,MICALL1,NCF4,NUP37,PHETA2,PPHLN1,REP15,RINT1,RXYLT1,SLC37A3,SREBF2,TBXAS1,TMEM117,TOM1,VWF,YEATS4
GO:CC	respiratory chain complex I	GO:0045271	0.6041	0.218891	19	166	1	12419	NDUFB2
GO:CC	mitochondrial respiratory chain complex I	GO:0005747	0.6041	0.218891	19	166	1	12419	NDUFB2
GO:MF	ligase activity, forming carbon-nitrogen bonds	GO:0016879	0.604388	0.218684	33	166	1	12419	TTLL1
GO:MF	kinase activator activity	GO:0019209	0.604388	0.218684	33	166	1	12419	TAB1
GO:MF	scaffold protein binding	GO:0097110	0.604388	0.218684	33	166	1	12419	ITPR2
GO:MF	sequence-specific double-stranded DNA binding	GO:1990837	0.607376	0.216542	575	166	9	12419	CREB3L2,ELK3,MCM5,NFYB,PRDM4,SREBF2,TEF,TRIM24,ZNF277
GO:BP	lipid oxidation	GO:0034440	0.607524	0.216437	52	166	2	12419	APPL2,PHYH
GO:BP	maintenance of location in cell	GO:0051651	0.607524	0.216437	101	166	3	12419	KDELR3,TSPO,TWF1
GO:BP	maintenance of location	GO:0051235	0.608834	0.215501	155	166	4	12419	KDELR3,SREBF2,TSPO,TWF1
GO:BP	regulation of B cell differentiation	GO:0045577	0.611906	0.213315	13	166	1	12419	NFAM1
GO:BP	'de novo' protein folding	GO:0006458	0.611906	0.213315	13	166	1	12419	CCT2
GO:BP	labyrinthine layer blood vessel development	GO:0060716	0.611906	0.213315	13	166	1	12419	WNT2
GO:BP	positive regulation of lipid storage	GO:0010884	0.611906	0.213315	13	166	1	12419	SREBF2
GO:BP	glycerophospholipid catabolic process	GO:0046475	0.611906	0.213315	13	166	1	12419	PLA2G6
GO:BP	auditory receptor cell morphogenesis	GO:0002093	0.611906	0.213315	13	166	1	12419	CLRN1
GO:BP	extracellular transport	GO:0006858	0.611906	0.213315	13	166	1	12419	TTLL1
GO:BP	SREBP signaling pathway	GO:0032933	0.611906	0.213315	13	166	1	12419	SREBF2
GO:BP	protein kinase C-activating G protein-coupled receptor signaling pathway	GO:0007205	0.611906	0.213315	13	166	1	12419	PICK1
GO:BP	response to sterol depletion	GO:0006991	0.611906	0.213315	13	166	1	12419	SREBF2
GO:BP	regulation of hydrogen peroxide-induced cell death	GO:1903205	0.611906	0.213315	13	166	1	12419	GPR37
GO:BP	response to dietary excess	GO:0002021	0.611906	0.213315	13	166	1	12419	APPL2
GO:BP	cellular response to sterol depletion	GO:0071501	0.611906	0.213315	13	166	1	12419	SREBF2
GO:BP	negative regulation of oxidative stress-induced neuron death	GO:1903204	0.611906	0.213315	13	166	1	12419	FBXO7
GO:BP	thyroid gland development	GO:0030878	0.611906	0.213315	13	166	1	12419	BRAF
GO:BP	negative regulation of response to oxidative stress	GO:1902883	0.611906	0.213315	13	166	1	12419	GPR37
GO:BP	protein mannosylation	GO:0035268	0.611906	0.213315	13	166	1	12419	RXYLT1
GO:BP	cristae formation	GO:0042407	0.611906	0.213315	13	166	1	12419	SAMM50
GO:BP	sperm-egg recognition	GO:0035036	0.611906	0.213315	13	166	1	12419	CCT2
GO:BP	cellular lipid catabolic process	GO:0044242	0.61455	0.211443	104	166	3	12419	NAGA,PHYH,PLA2G6
GO:BP	molting cycle process	GO:0022404	0.61455	0.211443	54	166	2	12419	CELSR1,LGR5
GO:BP	hair cycle process	GO:0022405	0.61455	0.211443	54	166	2	12419	CELSR1,LGR5
GO:BP	skin epidermis development	GO:0098773	0.61455	0.211443	54	166	2	12419	CELSR1,LGR5
GO:BP	regulation of vesicle-mediated transport	GO:0060627	0.616387	0.210147	216	166	5	12419	APPL2,BRAF,CHRM2,NTF3,RINT1
GO:CC	intrinsic component of endoplasmic reticulum membrane	GO:0031227	0.624114	0.204736	69	166	2	12419	SLC37A3,SREBF2
GO:MF	collagen binding	GO:0005518	0.627762	0.202205	35	166	1	12419	VWF
GO:BP	regulation of G1/S transition of mitotic cell cycle	GO:2000045	0.628722	0.201541	55	166	2	12419	APPL2,FBXO7
GO:BP	negative regulation of ATP metabolic process	GO:1903579	0.628722	0.201541	14	166	1	12419	TSPO
GO:BP	activation of immune response	GO:0002253	0.628722	0.201541	106	166	3	12419	APPL2,BRAF,NFAM1
GO:BP	phagocytosis, engulfment	GO:0006911	0.628722	0.201541	14	166	1	12419	APPL2
GO:BP	cell differentiation in hindbrain	GO:0021533	0.628722	0.201541	14	166	1	12419	TTLL1
GO:BP	chaperone-mediated protein complex assembly	GO:0051131	0.628722	0.201541	14	166	1	12419	CCT2
GO:BP	glutamate metabolic process	GO:0006536	0.628722	0.201541	14	166	1	12419	HAL
GO:BP	peptide catabolic process	GO:0043171	0.628722	0.201541	14	166	1	12419	LTA4H
GO:BP	respiratory burst	GO:0045730	0.628722	0.201541	14	166	1	12419	NCF4
GO:BP	regulation of protein targeting to membrane	GO:0090313	0.628722	0.201541	14	166	1	12419	MIEF1
GO:BP	cartilage condensation	GO:0001502	0.628722	0.201541	14	166	1	12419	FGF6
GO:BP	peptidyl-glutamic acid modification	GO:0018200	0.628722	0.201541	14	166	1	12419	TTLL1
GO:BP	negative regulation of exocytosis	GO:0045920	0.628722	0.201541	14	166	1	12419	BRAF
GO:BP	glycerol ether metabolic process	GO:0006662	0.628722	0.201541	14	166	1	12419	CHPT1
GO:BP	regulation of axon regeneration	GO:0048679	0.628722	0.201541	14	166	1	12419	BRAF
GO:BP	regulation of mitotic cell cycle	GO:0007346	0.628722	0.201541	218	166	5	12419	APPL2,FBXO7,INTS13,PDXP,TTLL12
GO:MF	ion binding	GO:0043167	0.629999	0.20066	3058	166	43	12419	ADCK2,APAF1,BRAF,CCT2,CELSR1,CPM,DMC1,DUS4L,FOXRED2,GCAT,IFT27,ITPR2,LOC100222415,LOC100222446,LOC100225408,LOC101234089,LTA4H,MCM10,MCM5,METAP2,MICALL1,MIEF1,PAH,PDE6H,PDXP,PHYH,POLR3B,PVALB,RASD2,RECQL,SEPTIN3,STAB2,STK38L,TBXAS1,THAP5,TRIM24,TTLL1,TTLL12,TWF1,WEE2,XPNPEP3,YARS2,ZCRB1
GO:MF	aminoacyl-tRNA ligase activity	GO:0004812	0.63103	0.19995	36	166	1	12419	YARS2
GO:MF	ligase activity, forming carbon-oxygen bonds	GO:0016875	0.63103	0.19995	36	166	1	12419	YARS2
GO:MF	isomerase activity	GO:0016853	0.63103	0.19995	99	166	2	12419	PUS7,TBXAS1
GO:CC	non-motile cilium	GO:0097730	0.635659	0.196776	71	166	2	12419	PHYH,SSTR3
GO:CC	sarcoplasm	GO:0016528	0.635659	0.196776	21	166	1	12419	ITPR2
GO:CC	cilium	GO:0005929	0.635659	0.196776	315	166	6	12419	CBY1,IFT27,PHYH,SSTR3,TTC26,TTLL1
GO:BP	supramolecular fiber organization	GO:0097435	0.63658	0.196147	342	166	7	12419	BRAF,CLRN1,LMOD2,MAP6D1,PDXP,TWF1,WASL
GO:MF	identical protein binding	GO:0042802	0.637948	0.195215	1021	166	15	12419	ADSL,APPL2,C1QTNF6,MCM10,MICALL1,MIEF1,NAGA,PDXP,PHETA2,PICK1,PLA2G6,SULT4A1,VWF,XPNPEP3,YARS2
GO:MF	modified amino acid binding	GO:0072341	0.638361	0.194934	37	166	1	12419	APPL2
GO:MF	transferase activity, transferring phosphorus-containing groups	GO:0016772	0.638361	0.194934	663	166	10	12419	ADCK2,BRAF,CHPT1,CMAS,LOC100222446,POLR3B,POLR3H,STK38L,TWF1,WEE2
GO:BP	lung development	GO:0030324	0.638979	0.194513	108	166	3	12419	CELSR1,TAB1,WNT2
GO:BP	regulation of protein polymerization	GO:0032271	0.638979	0.194513	108	166	3	12419	LMOD2,TWF1,WASL
GO:BP	pseudouridine synthesis	GO:0001522	0.646077	0.189716	15	166	1	12419	PUS7
GO:BP	response to lipoprotein particle	GO:0055094	0.646077	0.189716	15	166	1	12419	SREBF2
GO:BP	cell aggregation	GO:0098743	0.646077	0.189716	15	166	1	12419	FGF6
GO:BP	prostaglandin biosynthetic process	GO:0001516	0.646077	0.189716	15	166	1	12419	TBXAS1
GO:BP	developmental process involved in reproduction	GO:0003006	0.646077	0.189716	408	166	8	12419	ASZ1,IFT27,LGR5,SYCE3,TTC26,TTLL1,WEE2,WNT2
GO:BP	dopamine metabolic process	GO:0042417	0.646077	0.189716	15	166	1	12419	GPR37
GO:BP	actin cytoskeleton reorganization	GO:0031532	0.646077	0.189716	58	166	2	12419	NTF3,PARVG
GO:BP	regulation of neuron projection regeneration	GO:0070570	0.646077	0.189716	15	166	1	12419	BRAF
GO:BP	defense response to Gram-positive bacterium	GO:0050830	0.646077	0.189716	15	166	1	12419	STAB2
GO:BP	regulation of response to biotic stimulus	GO:0002831	0.646077	0.189716	110	166	3	12419	APPL2,POLR3B,TTLL12
GO:BP	prostanoid biosynthetic process	GO:0046457	0.646077	0.189716	15	166	1	12419	TBXAS1
GO:BP	response to ATP	GO:0033198	0.646077	0.189716	15	166	1	12419	PDXP
GO:BP	positive regulation of receptor internalization	GO:0002092	0.646077	0.189716	15	166	1	12419	NTF3
GO:BP	cell death in response to hydrogen peroxide	GO:0036474	0.646077	0.189716	15	166	1	12419	GPR37
GO:BP	auditory receptor cell development	GO:0060117	0.646077	0.189716	15	166	1	12419	CLRN1
GO:BP	negative regulation of fatty acid metabolic process	GO:0045922	0.646077	0.189716	15	166	1	12419	APPL2
GO:MF	phosphatidylinositol-4,5-bisphosphate binding	GO:0005546	0.64716	0.188988	38	166	1	12419	TWF1
GO:MF	cytoskeletal protein binding	GO:0008092	0.64953	0.1874	525	166	8	12419	IQGAP3,LMOD2,MAP6D1,PARVG,PICK1,TTLL12,TWF1,WASL
GO:BP	protein transport	GO:0015031	0.650696	0.186622	669	166	12	12419	APPL2,FBXO7,IFT27,KDELR3,MICALL1,MIEF1,PICK1,PLA2G6,REP15,SAMM50,TOM1,TOMM22
GO:MF	catalytic activity	GO:0003824	0.650885	0.186496	3625	166	50	12419	ACSS3,ADCK2,ADSL,BRAF,CHPT1,CMAS,CPM,DMC1,DUS4L,GCAT,GXYLT1,HAL,HELB,IFT27,LOC100222415,LOC100222446,LOC100225408,LOC100228825,LOC105758589,LTA4H,MCM5,METAP2,NAGA,NCF4,NDUFA12,OTOGL,PAH,PDE6H,PDXP,PHYH,PLA2G6,POLR3B,POLR3H,PRDM4,PUS7,PYROXD1,RASD2,RECQL,RXYLT1,SPAM1,STK38L,SULT4A1,TAB1,TBXAS1,TRIM24,TTLL1,TWF1,WEE2,XPNPEP3,YARS2
GO:MF	DNA-binding transcription activator activity, RNA polymerase II-specific	GO:0001228	0.650885	0.186496	244	166	4	12419	CREB3L2,ELK3,NFYB,PRDM4
GO:MF	oxidoreductase activity, acting on the CH-CH group of donors	GO:0016627	0.650885	0.186496	41	166	1	12419	DUS4L
GO:MF	tRNA binding	GO:0000049	0.650885	0.186496	39	166	1	12419	YARS2
GO:MF	pyridoxal phosphate binding	GO:0030170	0.650885	0.186496	41	166	1	12419	GCAT
GO:MF	manganese ion binding	GO:0030145	0.650885	0.186496	39	166	1	12419	XPNPEP3
GO:MF	ubiquitin protein ligase binding	GO:0031625	0.650885	0.186496	175	166	3	12419	CCT2,FBXO7,GPR37
GO:MF	hydro-lyase activity	GO:0016836	0.650885	0.186496	40	166	1	12419	TBXAS1
GO:MF	vitamin B6 binding	GO:0070279	0.650885	0.186496	41	166	1	12419	GCAT
GO:MF	cargo receptor activity	GO:0038024	0.650885	0.186496	41	166	1	12419	STAB2
GO:MF	protein homodimerization activity	GO:0042803	0.650885	0.186496	388	166	6	12419	APPL2,NAGA,PDXP,PHETA2,XPNPEP3,YARS2
GO:MF	postsynaptic neurotransmitter receptor activity	GO:0098960	0.650885	0.186496	40	166	1	12419	CHRM2
GO:MF	electron transfer activity	GO:0009055	0.651571	0.186038	42	166	1	12419	NDUFA12
GO:MF	hormone binding	GO:0042562	0.651571	0.186038	43	166	1	12419	VT1
GO:MF	p53 binding	GO:0002039	0.651571	0.186038	43	166	1	12419	TRIM24
GO:MF	DNA-binding transcription activator activity	GO:0001216	0.651571	0.186038	250	166	4	12419	CREB3L2,ELK3,NFYB,PRDM4
GO:MF	methylation-dependent protein binding	GO:0140034	0.651571	0.186038	43	166	1	12419	TTLL12
GO:MF	carbohydrate derivative binding	GO:0097367	0.651571	0.186038	1420	166	20	12419	ADCK2,APAF1,BRAF,CCT2,DMC1,IFT27,MCM5,MIEF1,PDE6H,POLR3B,RASD2,RECQL,SEPTIN3,STAB2,STK38L,TTLL1,TTLL12,TWF1,WEE2,YARS2
GO:MF	transcription regulatory region nucleic acid binding	GO:0001067	0.651571	0.186038	468	166	7	12419	CREB3L2,ELK3,NFYB,PRDM4,SREBF2,TRIM24,ZNF277
GO:MF	methylated histone binding	GO:0035064	0.651571	0.186038	43	166	1	12419	TTLL12
GO:MF	transcription cis-regulatory region binding	GO:0000976	0.651571	0.186038	467	166	7	12419	CREB3L2,ELK3,NFYB,PRDM4,SREBF2,TRIM24,ZNF277
GO:BP	respiratory tube development	GO:0030323	0.653303	0.184885	111	166	3	12419	CELSR1,TAB1,WNT2
GO:BP	regulation of fatty acid oxidation	GO:0046320	0.658283	0.181587	16	166	1	12419	APPL2
GO:BP	establishment of protein localization to chromosome	GO:0070199	0.658283	0.181587	16	166	1	12419	CCT2
GO:BP	nuclear division	GO:0000280	0.658283	0.181587	228	166	5	12419	ASZ1,DMC1,PDXP,SYCE3,WEE2
GO:BP	purine ribonucleoside monophosphate biosynthetic process	GO:0009168	0.658283	0.181587	16	166	1	12419	ADSL
GO:BP	morphogenesis of an epithelial fold	GO:0060571	0.658283	0.181587	16	166	1	12419	WNT2
GO:BP	cerebellar cortex formation	GO:0021697	0.658283	0.181587	16	166	1	12419	TTLL1
GO:BP	negative regulation of lipid transport	GO:0032369	0.658283	0.181587	16	166	1	12419	SREBF2
GO:BP	positive regulation of lamellipodium assembly	GO:0010592	0.658283	0.181587	16	166	1	12419	CLRN1
GO:BP	purine nucleoside monophosphate biosynthetic process	GO:0009127	0.658283	0.181587	16	166	1	12419	ADSL
GO:BP	regulation of type I interferon-mediated signaling pathway	GO:0060338	0.658283	0.181587	16	166	1	12419	TTLL12
GO:BP	regulation of chromatin assembly or disassembly	GO:0001672	0.658283	0.181587	16	166	1	12419	PPHLN1
GO:BP	regulation of meiotic nuclear division	GO:0040020	0.658283	0.181587	16	166	1	12419	WEE2
GO:BP	positive chemotaxis	GO:0050918	0.658283	0.181587	16	166	1	12419	NTF3
GO:BP	negative regulation of microtubule depolymerization	GO:0007026	0.658283	0.181587	16	166	1	12419	MAP6D1
GO:BP	positive regulation of cardiac muscle cell proliferation	GO:0060045	0.658283	0.181587	16	166	1	12419	WNT2
GO:BP	positive regulation of mesenchymal cell proliferation	GO:0002053	0.658283	0.181587	16	166	1	12419	WNT2
GO:BP	positive regulation of epidermal growth factor receptor signaling pathway	GO:0045742	0.658283	0.181587	16	166	1	12419	PDE6H
GO:BP	ether metabolic process	GO:0018904	0.658283	0.181587	16	166	1	12419	CHPT1
GO:BP	regulation of oxidative stress-induced neuron death	GO:1903203	0.658283	0.181587	16	166	1	12419	FBXO7
GO:BP	microtubule bundle formation	GO:0001578	0.658283	0.181587	60	166	2	12419	TTC26,TTLL1
GO:MF	unfolded protein binding	GO:0051082	0.658818	0.181235	45	166	1	12419	CCT2
GO:MF	ubiquitin-like protein ligase binding	GO:0044389	0.658818	0.181235	186	166	3	12419	CCT2,FBXO7,GPR37
GO:MF	purine ribonucleotide binding	GO:0032555	0.658818	0.181235	1282	166	18	12419	ADCK2,APAF1,BRAF,CCT2,DMC1,IFT27,MCM5,MIEF1,PDE6H,RASD2,RECQL,SEPTIN3,STK38L,TTLL1,TTLL12,TWF1,WEE2,YARS2
GO:MF	ubiquitin binding	GO:0043130	0.658818	0.181235	45	166	1	12419	FBXO7
GO:MF	RNA helicase activity	GO:0003724	0.658818	0.181235	45	166	1	12419	DMC1
GO:MF	alcohol binding	GO:0043178	0.658818	0.181235	44	166	1	12419	ITPR2
GO:MF	ATPase binding	GO:0051117	0.663476	0.178175	46	166	1	12419	SNU13
GO:MF	ribonucleotide binding	GO:0032553	0.663476	0.178175	1293	166	18	12419	ADCK2,APAF1,BRAF,CCT2,DMC1,IFT27,MCM5,MIEF1,PDE6H,RASD2,RECQL,SEPTIN3,STK38L,TTLL1,TTLL12,TWF1,WEE2,YARS2
GO:MF	cysteine-type endopeptidase activity	GO:0004197	0.663476	0.178175	46	166	1	12419	LOC100225408
GO:MF	purine nucleotide binding	GO:0017076	0.663476	0.178175	1292	166	18	12419	ADCK2,APAF1,BRAF,CCT2,DMC1,IFT27,MCM5,MIEF1,PDE6H,RASD2,RECQL,SEPTIN3,STK38L,TTLL1,TTLL12,TWF1,WEE2,YARS2
GO:BP	signal release from synapse	GO:0099643	0.663745	0.177999	61	166	2	12419	BRAF,CHRM2
GO:BP	neurotransmitter secretion	GO:0007269	0.663745	0.177999	61	166	2	12419	BRAF,CHRM2
GO:MF	nucleotide binding	GO:0000166	0.664113	0.177758	1444	166	20	12419	ADCK2,APAF1,BRAF,CCT2,DMC1,DUS4L,FOXRED2,IFT27,MCM5,MIEF1,PDE6H,RASD2,RECQL,SEPTIN3,STK38L,TTLL1,TTLL12,TWF1,WEE2,YARS2
GO:MF	nucleoside phosphate binding	GO:1901265	0.664113	0.177758	1444	166	20	12419	ADCK2,APAF1,BRAF,CCT2,DMC1,DUS4L,FOXRED2,IFT27,MCM5,MIEF1,PDE6H,RASD2,RECQL,SEPTIN3,STK38L,TTLL1,TTLL12,TWF1,WEE2,YARS2
GO:CC	bounding membrane of organelle	GO:0098588	0.666031	0.176506	655	166	11	12419	APPL2,ITPR2,KDELR3,LGR5,MICALL1,MIEF1,NCF4,REP15,SAMM50,SSTR3,TOMM22
GO:CC	actin cytoskeleton	GO:0015629	0.666866	0.175962	258	166	5	12419	LMOD2,PDXP,STK38L,TWF1,WASL
GO:CC	Golgi-associated vesicle membrane	GO:0030660	0.669457	0.174277	23	166	1	12419	KDELR3
GO:BP	negative regulation of endothelial cell apoptotic process	GO:2000352	0.670951	0.173309	17	166	1	12419	BRAF
GO:BP	regulation of mitochondrial fission	GO:0090140	0.670951	0.173309	17	166	1	12419	MIEF1
GO:BP	regulation of multi-organism process	GO:0043900	0.670951	0.173309	17	166	1	12419	WEE2
GO:BP	positive regulation of protein-containing complex disassembly	GO:0043243	0.670951	0.173309	17	166	1	12419	PDXP
GO:BP	response to bacterium	GO:0009617	0.670951	0.173309	173	166	4	12419	PLA2G6,ST13,STAB2,WASL
GO:BP	hair cycle	GO:0042633	0.670951	0.173309	63	166	2	12419	CELSR1,LGR5
GO:BP	molting cycle	GO:0042303	0.670951	0.173309	63	166	2	12419	CELSR1,LGR5
GO:BP	cytochrome complex assembly	GO:0017004	0.670951	0.173309	17	166	1	12419	C1AH12ORF73
GO:BP	positive regulation of cardiac muscle tissue growth	GO:0055023	0.670951	0.173309	17	166	1	12419	WNT2
GO:BP	protein localization to chromosome	GO:0034502	0.670951	0.173309	63	166	2	12419	CCT2,PPHLN1
GO:BP	Arp2/3 complex-mediated actin nucleation	GO:0034314	0.670951	0.173309	17	166	1	12419	WASL
GO:BP	negative regulation of cellular response to insulin stimulus	GO:1900077	0.670951	0.173309	17	166	1	12419	APPL2
GO:BP	hematopoietic stem cell differentiation	GO:0060218	0.670951	0.173309	17	166	1	12419	PUS7
GO:BP	cellular response to type I interferon	GO:0071357	0.670951	0.173309	17	166	1	12419	TTLL12
GO:BP	regulation of microtubule depolymerization	GO:0031114	0.670951	0.173309	17	166	1	12419	MAP6D1
GO:BP	cellular response to lipoprotein particle stimulus	GO:0071402	0.670951	0.173309	17	166	1	12419	SREBF2
GO:BP	female gamete generation	GO:0007292	0.670951	0.173309	63	166	2	12419	LGR5,WEE2
GO:BP	regulation of cell cycle G1/S phase transition	GO:1902806	0.670951	0.173309	62	166	2	12419	APPL2,FBXO7
GO:BP	type I interferon signaling pathway	GO:0060337	0.670951	0.173309	17	166	1	12419	TTLL12
GO:BP	amino sugar metabolic process	GO:0006040	0.670951	0.173309	17	166	1	12419	CMAS
GO:BP	cell cycle	GO:0007049	0.670951	0.173309	751	166	13	12419	APPL2,ASZ1,DMC1,FBXO7,INTS13,IQGAP3,MCM5,PDXP,SYCE3,THAP5,TTLL12,WASL,WEE2
GO:BP	organ induction	GO:0001759	0.670951	0.173309	17	166	1	12419	WNT2
GO:BP	positive regulation of immune response	GO:0050778	0.672701	0.172178	175	166	4	12419	APPL2,BRAF,NFAM1,POLR3B
GO:MF	cytokine activity	GO:0005125	0.672862	0.172074	48	166	1	12419	WNT2
GO:BP	response to ethanol	GO:0045471	0.676496	0.169735	18	166	1	12419	ITPR2
GO:BP	regulation of hematopoietic progenitor cell differentiation	GO:1901532	0.676496	0.169735	18	166	1	12419	PUS7
GO:BP	sperm axoneme assembly	GO:0007288	0.676496	0.169735	18	166	1	12419	TTLL1
GO:BP	amine biosynthetic process	GO:0009309	0.676496	0.169735	18	166	1	12419	GPR37
GO:BP	positive regulation of ERBB signaling pathway	GO:1901186	0.676496	0.169735	18	166	1	12419	PDE6H
GO:BP	sperm flagellum assembly	GO:0120316	0.676496	0.169735	18	166	1	12419	TTLL1
GO:BP	plasma membrane invagination	GO:0099024	0.676496	0.169735	18	166	1	12419	APPL2
GO:BP	regulation of insulin secretion	GO:0050796	0.676496	0.169735	64	166	2	12419	PICK1,PLA2G6
GO:BP	locomotory behavior	GO:0007626	0.676496	0.169735	118	166	3	12419	CELSR1,GPR37,RASD2
GO:BP	neuron death in response to oxidative stress	GO:0036475	0.676496	0.169735	18	166	1	12419	FBXO7
GO:BP	protein localization to endosome	GO:0036010	0.676496	0.169735	18	166	1	12419	MICALL1
GO:BP	cellular biogenic amine biosynthetic process	GO:0042401	0.676496	0.169735	18	166	1	12419	GPR37
GO:BP	toll-like receptor 4 signaling pathway	GO:0034142	0.676496	0.169735	18	166	1	12419	APPL2
GO:BP	negative regulation of leukocyte migration	GO:0002686	0.676496	0.169735	18	166	1	12419	WASL
GO:BP	water-soluble vitamin metabolic process	GO:0006767	0.676496	0.169735	18	166	1	12419	PDXP
GO:BP	cell-cell recognition	GO:0009988	0.676496	0.169735	18	166	1	12419	CCT2
GO:BP	female meiotic nuclear division	GO:0007143	0.676496	0.169735	18	166	1	12419	WEE2
GO:BP	positive regulation of protein polymerization	GO:0032273	0.676496	0.169735	64	166	2	12419	LMOD2,WASL
GO:BP	regulation of cardiac muscle hypertrophy	GO:0010611	0.676496	0.169735	18	166	1	12419	TWF1
GO:BP	axon regeneration	GO:0031103	0.676496	0.169735	18	166	1	12419	BRAF
GO:BP	heterochromatin assembly	GO:0031507	0.676496	0.169735	18	166	1	12419	PPHLN1
GO:CC	recycling endosome membrane	GO:0055038	0.677286	0.169228	25	166	1	12419	MICALL1
GO:CC	mitochondrial nucleoid	GO:0042645	0.677286	0.169228	29	166	1	12419	MTERF2
GO:CC	mediator complex	GO:0016592	0.677286	0.169228	27	166	1	12419	MED21
GO:CC	sarcomere	GO:0030017	0.677286	0.169228	77	166	2	12419	LMOD2,PYROXD1
GO:CC	cis-Golgi network	GO:0005801	0.677286	0.169228	25	166	1	12419	MAP6D1
GO:CC	stereocilium bundle	GO:0032421	0.677286	0.169228	29	166	1	12419	CLRN1
GO:CC	stereocilium	GO:0032420	0.677286	0.169228	26	166	1	12419	CLRN1
GO:CC	cleavage furrow	GO:0032154	0.677286	0.169228	28	166	1	12419	PDXP
GO:CC	envelope	GO:0031975	0.677286	0.169228	483	166	8	12419	C1AH12ORF73,MIEF1,NDUFA12,NDUFB2,NUP37,SAMM50,TOMM22,YEATS4
GO:CC	organelle envelope	GO:0031967	0.677286	0.169228	483	166	8	12419	C1AH12ORF73,MIEF1,NDUFA12,NDUFB2,NUP37,SAMM50,TOMM22,YEATS4
GO:CC	organelle membrane	GO:0031090	0.677286	0.169228	1256	166	19	12419	APPL2,C1AH12ORF73,CREB3L2,ITPR2,KDELR3,LGR5,MICALL1,MIEF1,NCF4,NDUFA12,NDUFB2,REP15,SAMM50,SLC37A3,SREBF2,SSTR3,TBXAS1,TOMM22,YEATS4
GO:CC	ciliary membrane	GO:0060170	0.677286	0.169228	27	166	1	12419	SSTR3
GO:CC	endosome	GO:0005768	0.677286	0.169228	408	166	7	12419	APPL2,GRAP2,MICALL1,NCF4,PHETA2,REP15,TOM1
GO:CC	mitochondrial respirasome	GO:0005746	0.677286	0.169228	28	166	1	12419	NDUFB2
GO:CC	SCF ubiquitin ligase complex	GO:0019005	0.677286	0.169228	26	166	1	12419	FBXO7
GO:CC	lateral plasma membrane	GO:0016328	0.677286	0.169228	28	166	1	12419	IQGAP3
GO:CC	U2-type precatalytic spliceosome	GO:0071005	0.677286	0.169228	28	166	1	12419	SNU13
GO:CC	precatalytic spliceosome	GO:0071011	0.677286	0.169228	29	166	1	12419	SNU13
GO:CC	spliceosomal snRNP complex	GO:0097525	0.677286	0.169228	28	166	1	12419	SNU13
GO:CC	H4 histone acetyltransferase complex	GO:1902562	0.677286	0.169228	27	166	1	12419	YEATS4
GO:CC	nucleoid	GO:0009295	0.677286	0.169228	29	166	1	12419	MTERF2
GO:CC	endoplasmic reticulum protein-containing complex	GO:0140534	0.677286	0.169228	79	166	2	12419	RINT1,SREBF2
GO:CC	respiratory chain complex	GO:0098803	0.677286	0.169228	28	166	1	12419	NDUFB2
GO:BP	establishment of localization in cell	GO:0051649	0.678595	0.168389	963	166	16	12419	APPL2,BRAF,CHRM2,CREB3L2,FBXO7,IFT27,LOC105759175,MICALL1,MIEF1,PHETA2,PLA2G6,RINT1,SAMM50,TOM1,TOMM22,TTC26
GO:MF	protein N-terminus binding	GO:0047485	0.680344	0.167271	49	166	1	12419	VWF
GO:CC	mitochondrial inner membrane	GO:0005743	0.680897	0.166919	159	166	3	12419	C1AH12ORF73,NDUFA12,NDUFB2
GO:CC	chromosome	GO:0005694	0.680897	0.166919	573	166	9	12419	HELB,HMGA2,LOC100218635,LOC100218691,LOC100220543,LOC100221944,LOC100224417,NUP37,THAP5
GO:CC	cortical actin cytoskeleton	GO:0030864	0.680897	0.166919	32	166	1	12419	WASL
GO:CC	nuclear pore	GO:0005643	0.680897	0.166919	33	166	1	12419	NUP37
GO:CC	endoplasmic reticulum membrane	GO:0005789	0.680897	0.166919	352	166	6	12419	CREB3L2,ITPR2,KDELR3,SLC37A3,SREBF2,TBXAS1
GO:CC	cytoskeleton	GO:0005856	0.680897	0.166919	1126	166	17	12419	CBY1,CCT2,CLRN1,GTSE1,IFT27,LMOD2,MAP6D1,PARVG,PDXP,PICK1,PLA2G6,POLR3H,STK38L,TTC26,TTLL1,TWF1,WASL
GO:CC	small nuclear ribonucleoprotein complex	GO:0030532	0.680897	0.166919	34	166	1	12419	SNU13
GO:CC	early endosome	GO:0005769	0.680897	0.166919	152	166	3	12419	APPL2,PHETA2,TOM1
GO:CC	cell division site	GO:0032153	0.680897	0.166919	30	166	1	12419	PDXP
GO:CC	collagen-containing extracellular matrix	GO:0062023	0.680897	0.166919	95	166	2	12419	VWF,WNT2
GO:CC	supramolecular fiber	GO:0099512	0.680897	0.166919	357	166	6	12419	CCT2,LMOD2,MAP6D1,PYROXD1,TTLL1,TWF1
GO:CC	supramolecular polymer	GO:0099081	0.680897	0.166919	363	166	6	12419	CCT2,LMOD2,MAP6D1,PYROXD1,TTLL1,TWF1
GO:CC	presynaptic membrane	GO:0042734	0.680897	0.166919	33	166	1	12419	PICK1
GO:CC	actin-based cell projection	GO:0098858	0.680897	0.166919	95	166	2	12419	CLRN1,TWF1
GO:CC	nuclear outer membrane-endoplasmic reticulum membrane network	GO:0042175	0.680897	0.166919	363	166	6	12419	CREB3L2,ITPR2,KDELR3,SLC37A3,SREBF2,TBXAS1
GO:CC	nuclear protein-containing complex	GO:0140513	0.680897	0.166919	645	166	10	12419	HELB,MED21,NFYB,NUP37,POLR3B,POLR3H,PRDM4,SNU13,YEATS4,ZCRB1
GO:CC	site of double-strand break	GO:0035861	0.680897	0.166919	34	166	1	12419	HELB
GO:CC	endoplasmic reticulum subcompartment	GO:0098827	0.680897	0.166919	359	166	6	12419	CREB3L2,ITPR2,KDELR3,SLC37A3,SREBF2,TBXAS1
GO:BP	regulation of cholesterol efflux	GO:0010874	0.682904	0.16564	19	166	1	12419	SREBF2
GO:BP	cell cycle process	GO:0022402	0.682904	0.16564	564	166	10	12419	APPL2,ASZ1,DMC1,FBXO7,INTS13,IQGAP3,PDXP,SYCE3,WASL,WEE2
GO:BP	neuron projection regeneration	GO:0031102	0.682904	0.16564	19	166	1	12419	BRAF
GO:BP	respiratory system process	GO:0003016	0.682904	0.16564	19	166	1	12419	TTLL1
GO:BP	negative regulation of DNA repair	GO:0045738	0.682904	0.16564	19	166	1	12419	HELB
GO:BP	detection of chemical stimulus	GO:0009593	0.682904	0.16564	19	166	1	12419	KCNMB4
GO:BP	response to cold	GO:0009409	0.682904	0.16564	19	166	1	12419	APPL2
GO:BP	nucleic acid transport	GO:0050657	0.682904	0.16564	66	166	2	12419	LOC105758589,LOC105759175
GO:BP	inner ear morphogenesis	GO:0042472	0.682904	0.16564	66	166	2	12419	CELSR1,CLRN1
GO:BP	RNA transport	GO:0050658	0.682904	0.16564	66	166	2	12419	LOC105758589,LOC105759175
GO:BP	retrograde vesicle-mediated transport, Golgi to endoplasmic reticulum	GO:0006890	0.682904	0.16564	19	166	1	12419	KDELR3
GO:BP	positive T cell selection	GO:0043368	0.682904	0.16564	19	166	1	12419	BRAF
GO:BP	cellular response to reactive oxygen species	GO:0034614	0.682904	0.16564	66	166	2	12419	GPR37,ZNF277
GO:BP	positive regulation of interferon-beta production	GO:0032728	0.682904	0.16564	19	166	1	12419	POLR3B
GO:BP	regulation of lamellipodium assembly	GO:0010591	0.682904	0.16564	19	166	1	12419	CLRN1
GO:BP	pyridine-containing compound metabolic process	GO:0072524	0.682904	0.16564	19	166	1	12419	PDXP
GO:BP	response to oxidative stress	GO:0006979	0.682904	0.16564	181	166	4	12419	FBXO7,GPR37,PYROXD1,ZNF277
GO:BP	negative regulation of double-strand break repair	GO:2000780	0.682904	0.16564	19	166	1	12419	HELB
GO:BP	regulation of anatomical structure size	GO:0090066	0.682904	0.16564	241	166	5	12419	IQGAP3,LMOD2,PDXP,TWF1,WASL
GO:BP	positive regulation of heart growth	GO:0060421	0.682904	0.16564	19	166	1	12419	WNT2
GO:BP	protein localization to chromatin	GO:0071168	0.682904	0.16564	19	166	1	12419	PPHLN1
GO:BP	regulation of response to reactive oxygen species	GO:1901031	0.682904	0.16564	19	166	1	12419	GPR37
GO:BP	placenta blood vessel development	GO:0060674	0.682904	0.16564	19	166	1	12419	WNT2
KEGG	Linoleic acid metabolism	KEGG:00591	0.683998	0.164945	7	166	1	12419	PLA2G6
KEGG	Neuroactive ligand-receptor interaction	KEGG:04080	0.683998	0.164945	236	166	6	12419	CHRM2,IAPP,PMCH,SSTR3,TSPO,VT1
KEGG	Phosphonate and phosphinate metabolism	KEGG:00440	0.683998	0.164945	6	166	1	12419	CHPT1
KEGG	alpha-Linolenic acid metabolism	KEGG:00592	0.683998	0.164945	8	166	1	12419	PLA2G6
GO:MF	DNA-binding transcription factor activity	GO:0003700	0.686184	0.163559	567	166	8	12419	ASCL4,CREB3L2,DBX2,ELK3,NFYB,PRDM4,SREBF2,TEF
GO:BP	ncRNA metabolic process	GO:0034660	0.692128	0.159813	245	166	5	12419	ASZ1,DUS4L,PUS7,TPRKB,YARS2
GO:BP	establishment of RNA localization	GO:0051236	0.692128	0.159813	68	166	2	12419	LOC105758589,LOC105759175
GO:BP	transport along microtubule	GO:0010970	0.692128	0.159813	68	166	2	12419	IFT27,TTC26
GO:BP	negative regulation of organelle organization	GO:0010639	0.692128	0.159813	183	166	4	12419	LMOD2,MAP6D1,TSPO,TWF1
GO:BP	respiratory system development	GO:0060541	0.692128	0.159813	124	166	3	12419	CELSR1,TAB1,WNT2
GO:CC	endoplasmic reticulum lumen	GO:0005788	0.692164	0.159791	35	166	1	12419	FOXRED2
GO:MF	phospholipase activity	GO:0004620	0.693805	0.158763	52	166	1	12419	PLA2G6
GO:MF	phosphoprotein phosphatase activity	GO:0004721	0.693805	0.158763	125	166	2	12419	PDXP,TAB1
GO:MF	protein serine/threonine phosphatase activity	GO:0004722	0.693805	0.158763	52	166	1	12419	TAB1
GO:MF	cytokine receptor activity	GO:0004896	0.693805	0.158763	51	166	1	12419	IL2RB
GO:MF	carbon-oxygen lyase activity	GO:0016835	0.693805	0.158763	53	166	1	12419	TBXAS1
GO:MF	ubiquitin-like protein binding	GO:0032182	0.693805	0.158763	53	166	1	12419	FBXO7
GO:MF	immune receptor activity	GO:0140375	0.693805	0.158763	53	166	1	12419	IL2RB
GO:MF	sequence-specific DNA binding	GO:0043565	0.693805	0.158763	652	166	9	12419	CREB3L2,ELK3,MCM5,NFYB,PRDM4,SREBF2,TEF,TRIM24,ZNF277
GO:MF	ATPase	GO:0016887	0.693805	0.158763	350	166	5	12419	CCT2,DMC1,HELB,MCM5,RECQL
KEGG	Glycosphingolipid biosynthesis - globo and isoglobo series	KEGG:00603	0.694967	0.158036	9	166	1	12419	LOC100222013
GO:MF	metal ion binding	GO:0046872	0.694989	0.158022	1778	166	24	12419	BRAF,CELSR1,CPM,LOC100222415,LOC100222446,LOC100225408,LOC101234089,LTA4H,MCM10,METAP2,MICALL1,PAH,PDXP,PHYH,POLR3B,PVALB,STAB2,STK38L,TBXAS1,THAP5,TRIM24,WEE2,XPNPEP3,ZCRB1
GO:BP	positive regulation of reactive oxygen species metabolic process	GO:2000379	0.695777	0.15753	20	166	1	12419	TSPO
GO:BP	mitochondrial fission	GO:0000266	0.695777	0.15753	20	166	1	12419	MIEF1
GO:BP	regulation of nuclear division	GO:0051783	0.695777	0.15753	69	166	2	12419	PDXP,WEE2
GO:BP	response to type I interferon	GO:0034340	0.695777	0.15753	20	166	1	12419	TTLL12
GO:BP	regulation of muscle hypertrophy	GO:0014743	0.695777	0.15753	20	166	1	12419	TWF1
GO:BP	mammary gland epithelial cell proliferation	GO:0033598	0.695777	0.15753	20	166	1	12419	IQGAP3
GO:BP	inner mitochondrial membrane organization	GO:0007007	0.695777	0.15753	20	166	1	12419	SAMM50
GO:BP	catechol-containing compound metabolic process	GO:0009712	0.695777	0.15753	20	166	1	12419	GPR37
GO:BP	cardiac atrium morphogenesis	GO:0003209	0.695777	0.15753	20	166	1	12419	WNT2
GO:BP	negative regulation of innate immune response	GO:0045824	0.695777	0.15753	20	166	1	12419	TTLL12
GO:BP	catecholamine metabolic process	GO:0006584	0.695777	0.15753	20	166	1	12419	GPR37
GO:BP	cerebellar Purkinje cell layer development	GO:0021680	0.695777	0.15753	20	166	1	12419	TTLL1
GO:BP	regulation of leukocyte differentiation	GO:1902105	0.699068	0.155481	126	166	3	12419	BRAF,FBXO7,NFAM1
KEGG	Apoptosis	KEGG:04210	0.699161	0.155423	92	166	3	12419	APAF1,ITPR2,LOC100225408
GO:CC	trans-Golgi network	GO:0005802	0.699841	0.155001	99	166	2	12419	LGR5,PHETA2
GO:MF	adenyl ribonucleotide binding	GO:0032559	0.700787	0.154414	1033	166	14	12419	ADCK2,APAF1,BRAF,CCT2,DMC1,MCM5,MIEF1,RECQL,STK38L,TTLL1,TTLL12,TWF1,WEE2,YARS2
GO:BP	prostanoid metabolic process	GO:0006692	0.702393	0.15342	21	166	1	12419	TBXAS1
GO:BP	prostaglandin metabolic process	GO:0006693	0.702393	0.15342	21	166	1	12419	TBXAS1
GO:BP	negative regulation of protein-containing complex assembly	GO:0031333	0.702393	0.15342	71	166	2	12419	LMOD2,TWF1
GO:BP	negative regulation of cell development	GO:0010721	0.702393	0.15342	71	166	2	12419	APPL2,WEE2
GO:BP	cerebellar cortex morphogenesis	GO:0021696	0.702393	0.15342	21	166	1	12419	TTLL1
GO:BP	regulation of animal organ formation	GO:0003156	0.702393	0.15342	21	166	1	12419	WNT2
GO:BP	cilium organization	GO:0044782	0.702393	0.15342	187	166	4	12419	CBY1,IFT27,TTC26,TTLL1
GO:BP	regulation of animal organ morphogenesis	GO:2000027	0.702393	0.15342	70	166	2	12419	CELSR1,WNT2
GO:BP	protein localization to chromosome, telomeric region	GO:0070198	0.702393	0.15342	21	166	1	12419	CCT2
GO:BP	cellular response to cAMP	GO:0071320	0.702393	0.15342	21	166	1	12419	ITPR2
GO:BP	dopaminergic neuron differentiation	GO:0071542	0.702393	0.15342	21	166	1	12419	WNT2
GO:BP	negative regulation of protein serine/threonine kinase activity	GO:0071901	0.702393	0.15342	71	166	2	12419	FBXO7,WEE2
GO:BP	aspartate family amino acid metabolic process	GO:0009066	0.702393	0.15342	21	166	1	12419	GCAT
GO:BP	aromatic amino acid family metabolic process	GO:0009072	0.702393	0.15342	21	166	1	12419	PAH
GO:BP	mannosylation	GO:0097502	0.702393	0.15342	21	166	1	12419	RXYLT1
GO:BP	positive regulation of phagocytosis	GO:0050766	0.702393	0.15342	21	166	1	12419	APPL2
GO:BP	positive regulation of lamellipodium organization	GO:1902745	0.702393	0.15342	21	166	1	12419	CLRN1
GO:BP	regulation of protein targeting	GO:1903533	0.702393	0.15342	21	166	1	12419	MIEF1
GO:BP	negative regulation of gene expression, epigenetic	GO:0045814	0.702393	0.15342	21	166	1	12419	PPHLN1
GO:BP	regulation of actin cytoskeleton reorganization	GO:2000249	0.702393	0.15342	21	166	1	12419	NTF3
GO:BP	homologous chromosome pairing at meiosis	GO:0007129	0.702393	0.15342	21	166	1	12419	SYCE3
KEGG	Calcium signaling pathway	KEGG:04020	0.707345	0.150369	159	166	3	12419	CHRM2,FGF6,ITPR2
KEGG	Amino sugar and nucleotide sugar metabolism	KEGG:00520	0.707345	0.150369	33	166	1	12419	CMAS
KEGG	Other types of O-glycan biosynthesis	KEGG:00514	0.707345	0.150369	32	166	1	12419	GXYLT1
KEGG	Herpes simplex virus 1 infection	KEGG:05168	0.707345	0.150369	87	166	2	12419	APAF1,TAB1
KEGG	Melanogenesis	KEGG:04916	0.707345	0.150369	70	166	2	12419	CREB3L2,WNT2
KEGG	Glycosphingolipid biosynthesis - lacto and neolacto series	KEGG:00601	0.707345	0.150369	16	166	1	12419	LOC100222013
KEGG	Histidine metabolism	KEGG:00340	0.707345	0.150369	15	166	1	12419	HAL
KEGG	NOD-like receptor signaling pathway	KEGG:04621	0.707345	0.150369	82	166	2	12419	ITPR2,TAB1
KEGG	Glycine, serine and threonine metabolism	KEGG:00260	0.707345	0.150369	27	166	1	12419	GCAT
KEGG	Steroid hormone biosynthesis	KEGG:00140	0.707345	0.150369	21	166	1	12419	LOC100222415
KEGG	Alanine, aspartate and glutamate metabolism	KEGG:00250	0.707345	0.150369	26	166	1	12419	ADSL
KEGG	Purine metabolism	KEGG:00230	0.707345	0.150369	92	166	2	12419	ADSL,PDE6H
KEGG	Metabolic pathways	KEGG:01100	0.707345	0.150369	908	166	14	12419	ACSS3,ADSL,CHPT1,CMAS,GCAT,HAL,LOC100222013,LOC100222446,LTA4H,NDUFB2,PDE6H,PLA2G6,SPAM1,TBXAS1
KEGG	Focal adhesion	KEGG:04510	0.707345	0.150369	133	166	3	12419	BRAF,LOC100225408,VWF
KEGG	Necroptosis	KEGG:04217	0.707345	0.150369	76	166	2	12419	LOC100224417,LOC100225408
KEGG	DNA replication	KEGG:03030	0.707345	0.150369	23	166	1	12419	MCM5
KEGG	Glycosaminoglycan degradation	KEGG:00531	0.707345	0.150369	14	166	1	12419	SPAM1
KEGG	p53 signaling pathway	KEGG:04115	0.707345	0.150369	54	166	2	12419	APAF1,GTSE1
KEGG	Cell cycle	KEGG:04110	0.707345	0.150369	81	166	2	12419	MCM5,WEE2
KEGG	Propanoate metabolism	KEGG:00640	0.707345	0.150369	24	166	1	12419	ACSS3
KEGG	Glycerophospholipid metabolism	KEGG:00564	0.707345	0.150369	55	166	2	12419	CHPT1,PLA2G6
KEGG	Homologous recombination	KEGG:03440	0.707345	0.150369	29	166	1	12419	SYCP3
GO:MF	acetyltransferase activity	GO:0016407	0.708015	0.149957	56	166	1	12419	GCAT
GO:MF	adenyl nucleotide binding	GO:0030554	0.708015	0.149957	1038	166	14	12419	ADCK2,APAF1,BRAF,CCT2,DMC1,MCM5,MIEF1,RECQL,STK38L,TTLL1,TTLL12,TWF1,WEE2,YARS2
GO:MF	dioxygenase activity	GO:0051213	0.708015	0.149957	56	166	1	12419	PHYH
GO:BP	regulation of cellular senescence	GO:2000772	0.708218	0.149833	22	166	1	12419	ZNF277
GO:BP	cochlea development	GO:0090102	0.708218	0.149833	22	166	1	12419	IFT27
GO:BP	blastocyst development	GO:0001824	0.708218	0.149833	72	166	2	12419	MED21,TTLL1
GO:BP	regulation of meiotic cell cycle	GO:0051445	0.708218	0.149833	22	166	1	12419	WEE2
GO:BP	negative regulation of microtubule polymerization or depolymerization	GO:0031111	0.708218	0.149833	22	166	1	12419	MAP6D1
GO:BP	purine ribonucleoside monophosphate metabolic process	GO:0009167	0.708218	0.149833	22	166	1	12419	ADSL
GO:BP	transcription by RNA polymerase III	GO:0006383	0.708218	0.149833	22	166	1	12419	POLR3H
GO:BP	negative regulation of DNA recombination	GO:0045910	0.708218	0.149833	22	166	1	12419	HELB
GO:BP	mammary gland development	GO:0030879	0.708218	0.149833	73	166	2	12419	IQGAP3,WNT2
GO:BP	negative regulation of mitochondrion organization	GO:0010823	0.708218	0.149833	22	166	1	12419	TSPO
GO:BP	regulation of cardiac muscle cell proliferation	GO:0060043	0.708218	0.149833	22	166	1	12419	WNT2
GO:BP	microtubule depolymerization	GO:0007019	0.708218	0.149833	22	166	1	12419	MAP6D1
GO:BP	Wnt signaling pathway, planar cell polarity pathway	GO:0060071	0.708218	0.149833	22	166	1	12419	CELSR1
GO:BP	negative regulation of lipid localization	GO:1905953	0.708218	0.149833	22	166	1	12419	SREBF2
GO:BP	protein polymerization	GO:0051258	0.708218	0.149833	131	166	3	12419	LMOD2,TWF1,WASL
GO:BP	cellular response to glucose starvation	GO:0042149	0.708218	0.149833	22	166	1	12419	C1AH12ORF66
GO:BP	dendritic spine morphogenesis	GO:0060997	0.708218	0.149833	22	166	1	12419	WASL
GO:BP	chaperone-mediated protein folding	GO:0061077	0.708218	0.149833	22	166	1	12419	CCT2
GO:BP	regulation of mesenchymal cell proliferation	GO:0010464	0.708218	0.149833	22	166	1	12419	WNT2
GO:BP	sarcomere organization	GO:0045214	0.708218	0.149833	22	166	1	12419	LMOD2
GO:BP	mRNA modification	GO:0016556	0.708218	0.149833	22	166	1	12419	PUS7
GO:BP	antigen receptor-mediated signaling pathway	GO:0050851	0.708218	0.149833	73	166	2	12419	BRAF,NFAM1
GO:CC	non-membrane-bounded organelle	GO:0043228	0.708384	0.149731	2265	166	32	12419	ASZ1,CBY1,CCT2,CLRN1,GTSE1,HELB,HMGA2,IFT27,LMOD2,LOC100218635,LOC100218691,LOC100220543,LOC100221944,LOC100224417,MAP6D1,MCM10,MTERF2,NUP37,PARVG,PDXP,PHLDA1,PICK1,PLA2G6,POLR3H,PYROXD1,SNU13,STK38L,THAP5,TTC26,TTLL1,TWF1,WASL
GO:CC	intracellular non-membrane-bounded organelle	GO:0043232	0.708384	0.149731	2263	166	32	12419	ASZ1,CBY1,CCT2,CLRN1,GTSE1,HELB,HMGA2,IFT27,LMOD2,LOC100218635,LOC100218691,LOC100220543,LOC100221944,LOC100224417,MAP6D1,MCM10,MTERF2,NUP37,PARVG,PDXP,PHLDA1,PICK1,PLA2G6,POLR3H,PYROXD1,SNU13,STK38L,THAP5,TTC26,TTLL1,TWF1,WASL
GO:CC	spliceosomal complex	GO:0005681	0.708384	0.149731	101	166	2	12419	SNU13,ZCRB1
GO:BP	regulation of cytokine production involved in inflammatory response	GO:1900015	0.709225	0.149216	23	166	1	12419	APPL2
GO:BP	regulation of MAPK cascade	GO:0043408	0.709225	0.149216	326	166	6	12419	BRAF,GPR37,IQGAP3,NTF3,PDE6H,TAB1
GO:BP	membrane lipid catabolic process	GO:0046466	0.709225	0.149216	23	166	1	12419	NAGA
GO:BP	cardiac atrium development	GO:0003230	0.709225	0.149216	24	166	1	12419	WNT2
GO:BP	regulation of establishment of planar polarity	GO:0090175	0.709225	0.149216	24	166	1	12419	CELSR1
GO:BP	developmental induction	GO:0031128	0.709225	0.149216	24	166	1	12419	WNT2
GO:BP	synaptic vesicle cycle	GO:0099504	0.709225	0.149216	77	166	2	12419	BRAF,CHRM2
GO:BP	spermatid development	GO:0007286	0.709225	0.149216	74	166	2	12419	TTC26,TTLL1
GO:BP	cardiac epithelial to mesenchymal transition	GO:0060317	0.709225	0.149216	24	166	1	12419	WNT2
GO:BP	regulation of peptide hormone secretion	GO:0090276	0.709225	0.149216	77	166	2	12419	PICK1,PLA2G6
GO:BP	positive regulation of establishment of protein localization	GO:1904951	0.709225	0.149216	132	166	3	12419	CCT2,MIEF1,PLA2G6
GO:BP	positive regulation of substrate adhesion-dependent cell spreading	GO:1900026	0.709225	0.149216	23	166	1	12419	BRAF
GO:BP	cellular response to drug	GO:0035690	0.709225	0.149216	23	166	1	12419	BRAF
GO:BP	positive regulation of telomere maintenance via telomere lengthening	GO:1904358	0.709225	0.149216	24	166	1	12419	CCT2
GO:BP	negative regulation of epithelial cell apoptotic process	GO:1904036	0.709225	0.149216	24	166	1	12419	BRAF
GO:BP	homologous chromosome segregation	GO:0045143	0.709225	0.149216	24	166	1	12419	SYCE3
GO:BP	positive regulation of telomere maintenance via telomerase	GO:0032212	0.709225	0.149216	23	166	1	12419	CCT2
GO:BP	positive regulation of cellular component biogenesis	GO:0044089	0.709225	0.149216	262	166	5	12419	BRAF,CLRN1,LMOD2,PPHLN1,WASL
GO:BP	regulation of exocytosis	GO:0017157	0.709225	0.149216	77	166	2	12419	BRAF,CHRM2
GO:BP	membrane organization	GO:0061024	0.709225	0.149216	328	166	6	12419	APPL2,MICALL1,SAMM50,SPAM1,TOMM22,WASL
GO:BP	positive regulation of insulin secretion	GO:0032024	0.709225	0.149216	23	166	1	12419	PLA2G6
GO:BP	inner ear auditory receptor cell differentiation	GO:0042491	0.709225	0.149216	24	166	1	12419	CLRN1
GO:BP	response to nutrient levels	GO:0031667	0.709225	0.149216	135	166	3	12419	APPL2,C1AH12ORF66,SREBF2
GO:BP	phagocytosis	GO:0006909	0.709225	0.149216	77	166	2	12419	APPL2,NCF4
GO:BP	defense response to other organism	GO:0098542	0.709225	0.149216	257	166	5	12419	APPL2,PLA2G6,POLR3B,STAB2,TTLL12
GO:BP	microtubule organizing center localization	GO:0061842	0.709225	0.149216	24	166	1	12419	INTS13
GO:BP	iron ion transport	GO:0006826	0.709225	0.149216	24	166	1	12419	REP15
GO:BP	positive regulation of fibroblast proliferation	GO:0048146	0.709225	0.149216	24	166	1	12419	WNT2
GO:BP	heterochromatin organization	GO:0070828	0.709225	0.149216	24	166	1	12419	PPHLN1
GO:BP	regulation of lipid storage	GO:0010883	0.709225	0.149216	23	166	1	12419	SREBF2
GO:BP	spermatid differentiation	GO:0048515	0.709225	0.149216	75	166	2	12419	TTC26,TTLL1
GO:BP	oocyte development	GO:0048599	0.709225	0.149216	23	166	1	12419	WEE2
GO:BP	DNA methylation	GO:0006306	0.709225	0.149216	23	166	1	12419	ASZ1
GO:BP	DNA alkylation	GO:0006305	0.709225	0.149216	23	166	1	12419	ASZ1
GO:BP	specification of animal organ identity	GO:0010092	0.709225	0.149216	24	166	1	12419	WNT2
GO:BP	regulation of antigen receptor-mediated signaling pathway	GO:0050854	0.709225	0.149216	24	166	1	12419	NFAM1
GO:BP	purine nucleoside monophosphate metabolic process	GO:0009126	0.709225	0.149216	23	166	1	12419	ADSL
GO:BP	centrosome localization	GO:0051642	0.709225	0.149216	24	166	1	12419	INTS13
GO:BP	response to cAMP	GO:0051591	0.709225	0.149216	23	166	1	12419	ITPR2
GO:BP	cellular response to transforming growth factor beta stimulus	GO:0071560	0.709225	0.149216	134	166	3	12419	APPL2,TAB1,WNT2
GO:BP	ribonucleoside monophosphate biosynthetic process	GO:0009156	0.709225	0.149216	23	166	1	12419	ADSL
GO:BP	membrane invagination	GO:0010324	0.709225	0.149216	23	166	1	12419	APPL2
GO:BP	response to axon injury	GO:0048678	0.709225	0.149216	24	166	1	12419	BRAF
GO:BP	B cell receptor signaling pathway	GO:0050853	0.709225	0.149216	24	166	1	12419	NFAM1
GO:BP	regulation of cardiac muscle tissue growth	GO:0055021	0.709225	0.149216	23	166	1	12419	WNT2
GO:BP	cytokine production involved in inflammatory response	GO:0002534	0.709225	0.149216	23	166	1	12419	APPL2
GO:BP	hematopoietic progenitor cell differentiation	GO:0002244	0.709225	0.149216	76	166	2	12419	BRAF,PUS7
GO:BP	positive regulation of telomerase activity	GO:0051973	0.709225	0.149216	23	166	1	12419	CCT2
GO:BP	protein palmitoylation	GO:0018345	0.709225	0.149216	23	166	1	12419	MAP6D1
GO:BP	negative regulation of lymphocyte differentiation	GO:0045620	0.709225	0.149216	24	166	1	12419	FBXO7
GO:BP	regulation of immune response	GO:0050776	0.709225	0.149216	260	166	5	12419	APPL2,BRAF,NFAM1,POLR3B,TTLL12
GO:BP	protein localization to lysosome	GO:0061462	0.709225	0.149216	24	166	1	12419	C1AH12ORF66
GO:BP	regulation of cellular component organization	GO:0051128	0.709225	0.149216	1136	166	18	12419	APPL2,BRAF,CCT2,CELSR1,CLRN1,FBXO7,LMOD2,LOC100225408,MAP6D1,MIEF1,NTF3,PDXP,PPHLN1,STK38L,TSPO,TWF1,WASL,WEE2
GO:MF	DNA-binding transcription repressor activity, RNA polymerase II-specific	GO:0001227	0.710492	0.148441	134	166	2	12419	ELK3,SREBF2
GO:MF	chaperone binding	GO:0051087	0.710492	0.148441	57	166	1	12419	VWF
GO:MF	DNA-binding transcription repressor activity	GO:0001217	0.710492	0.148441	134	166	2	12419	ELK3,SREBF2
GO:CC	histone methyltransferase complex	GO:0035097	0.710584	0.148385	38	166	1	12419	PRDM4
GO:CC	replication fork	GO:0005657	0.710584	0.148385	38	166	1	12419	HELB
GO:CC	vesicle membrane	GO:0012506	0.713718	0.146473	312	166	5	12419	APPL2,KDELR3,MICALL1,NCF4,REP15
GO:MF	neurotransmitter receptor activity	GO:0030594	0.71506	0.145657	58	166	1	12419	CHRM2
GO:BP	cytoskeleton-dependent intracellular transport	GO:0030705	0.716192	0.14497	78	166	2	12419	IFT27,TTC26
GO:BP	ear morphogenesis	GO:0042471	0.716192	0.14497	78	166	2	12419	CELSR1,CLRN1
GO:BP	regulation of peptide secretion	GO:0002791	0.716192	0.14497	78	166	2	12419	PICK1,PLA2G6
GO:CC	Sm-like protein family complex	GO:0120114	0.716893	0.144546	40	166	1	12419	SNU13
GO:CC	extrinsic component of membrane	GO:0019898	0.716893	0.144546	106	166	2	12419	MICALL1,WNT2
GO:CC	cytoplasmic vesicle	GO:0031410	0.716893	0.144546	748	166	11	12419	APPL2,CLRN1,GRAP2,KDELR3,MAP6D1,MICALL1,NCF4,PHETA2,REP15,TOM1,VWF
GO:CC	supramolecular complex	GO:0099080	0.716893	0.144546	531	166	8	12419	ASZ1,CCT2,LMOD2,MAP6D1,NUP37,PYROXD1,TTLL1,TWF1
GO:BP	response to transforming growth factor beta	GO:0071559	0.717193	0.144364	138	166	3	12419	APPL2,TAB1,WNT2
GO:CC	microtubule	GO:0005874	0.718815	0.143383	177	166	3	12419	CCT2,MAP6D1,TTLL1
GO:CC	intercellular bridge	GO:0045171	0.718815	0.143383	41	166	1	12419	C1AH12ORF66
GO:CC	intracellular vesicle	GO:0097708	0.718815	0.143383	753	166	11	12419	APPL2,CLRN1,GRAP2,KDELR3,MAP6D1,MICALL1,NCF4,PHETA2,REP15,TOM1,VWF
GO:BP	unsaturated fatty acid biosynthetic process	GO:0006636	0.720732	0.142226	25	166	1	12419	TBXAS1
GO:BP	activation of GTPase activity	GO:0090630	0.720732	0.142226	25	166	1	12419	NTF3
GO:BP	phospholipid catabolic process	GO:0009395	0.720732	0.142226	25	166	1	12419	PLA2G6
GO:BP	positive regulation of animal organ morphogenesis	GO:0110110	0.720732	0.142226	25	166	1	12419	WNT2
GO:BP	positive regulation of receptor-mediated endocytosis	GO:0048260	0.720732	0.142226	25	166	1	12419	NTF3
GO:BP	male meiotic nuclear division	GO:0007140	0.720732	0.142226	25	166	1	12419	ASZ1
GO:BP	regulation of lamellipodium organization	GO:1902743	0.720732	0.142226	25	166	1	12419	CLRN1
GO:BP	regulation of endothelial cell apoptotic process	GO:2000351	0.720732	0.142226	25	166	1	12419	BRAF
GO:BP	response to estrogen	GO:0043627	0.720732	0.142226	25	166	1	12419	TRIM24
GO:BP	monoamine transport	GO:0015844	0.720732	0.142226	25	166	1	12419	PICK1
GO:BP	DNA metabolic process	GO:0006259	0.722783	0.140992	467	166	8	12419	ASZ1,CCT2,DMC1,HELB,MCM10,MCM5,RECQL,SYCE3
GO:CC	actin filament	GO:0005884	0.723127	0.140786	43	166	1	12419	LMOD2
GO:CC	microvillus	GO:0005902	0.723127	0.140786	43	166	1	12419	CLRN1
GO:CC	organelle inner membrane	GO:0019866	0.723127	0.140786	182	166	3	12419	C1AH12ORF73,NDUFA12,NDUFB2
GO:CC	coated vesicle membrane	GO:0030662	0.723127	0.140786	42	166	1	12419	KDELR3
GO:CC	inclusion body	GO:0016234	0.723127	0.140786	43	166	1	12419	FBXO7
GO:MF	protein-containing complex binding	GO:0044877	0.724604	0.139899	525	166	7	12419	APPL2,HELB,SLC25A3,STAB2,TTC26,TWF1,VWF
GO:MF	lipase activity	GO:0016298	0.724604	0.139899	60	166	1	12419	PLA2G6
GO:MF	carboxylic ester hydrolase activity	GO:0052689	0.724604	0.139899	60	166	1	12419	PLA2G6
GO:MF	transcription coactivator activity	GO:0003713	0.724604	0.139899	139	166	2	12419	MED21,TRIM24
GO:BP	organophosphate catabolic process	GO:0046434	0.72715	0.138376	80	166	2	12419	PDXP,PLA2G6
GO:BP	regulation of peptide transport	GO:0090087	0.72715	0.138376	80	166	2	12419	PICK1,PLA2G6
GO:BP	response to other organism	GO:0051707	0.72715	0.138376	401	166	7	12419	APPL2,PLA2G6,POLR3B,ST13,STAB2,TTLL12,WASL
GO:BP	positive regulation of organ growth	GO:0046622	0.727784	0.137997	26	166	1	12419	WNT2
GO:BP	positive regulation of stress fiber assembly	GO:0051496	0.727784	0.137997	26	166	1	12419	BRAF
GO:BP	regulation of double-strand break repair via homologous recombination	GO:0010569	0.727784	0.137997	26	166	1	12419	HELB
GO:BP	actin filament bundle assembly	GO:0051017	0.727784	0.137997	81	166	2	12419	BRAF,PDXP
GO:BP	coronary vasculature development	GO:0060976	0.727784	0.137997	26	166	1	12419	TAB1
GO:BP	regulation of heart growth	GO:0060420	0.727784	0.137997	26	166	1	12419	WNT2
GO:BP	regulation of cell aging	GO:0090342	0.727784	0.137997	26	166	1	12419	ZNF277
GO:BP	visual learning	GO:0008542	0.727784	0.137997	26	166	1	12419	BRAF
GO:BP	positive regulation of pri-miRNA transcription by RNA polymerase II	GO:1902895	0.727784	0.137997	26	166	1	12419	SREBF2
GO:BP	regulation of insulin secretion involved in cellular response to glucose stimulus	GO:0061178	0.727784	0.137997	26	166	1	12419	PLA2G6
GO:BP	toxin transport	GO:1901998	0.727784	0.137997	26	166	1	12419	CCT2
GO:BP	response to external biotic stimulus	GO:0043207	0.727784	0.137997	402	166	7	12419	APPL2,PLA2G6,POLR3B,ST13,STAB2,TTLL12,WASL
GO:BP	regulation of lymphocyte migration	GO:2000401	0.727784	0.137997	26	166	1	12419	WASL
GO:BP	peptidyl-cysteine modification	GO:0018198	0.727784	0.137997	26	166	1	12419	MAP6D1
GO:CC	cytosol	GO:0005829	0.730659	0.136285	1797	166	25	12419	ADSL,APAF1,CCT2,CENPM,FBXO7,GRAP2,LTA4H,METAP2,NCF4,PDXP,PICK1,PLA2G6,PPHLN1,RIC8B,ST13,STAB2,STK38L,TAB1,TOM1,TPRKB,TSPO,TWF1,WASL,WEE2,XPNPEP3
KEGG	Cellular senescence	KEGG:04218	0.732428	0.135235	99	166	2	12419	ITPR2,LOC100225408
GO:BP	nitrogen compound transport	GO:0071705	0.732952	0.134924	887	166	14	12419	APPL2,FBXO7,IFT27,KDELR3,LOC105758589,LOC105759175,MICALL1,MIEF1,PICK1,PLA2G6,REP15,SAMM50,TOM1,TOMM22
GO:BP	epidermis development	GO:0008544	0.733755	0.134449	143	166	3	12419	CELSR1,CLRN1,LGR5
GO:BP	response to endoplasmic reticulum stress	GO:0034976	0.733755	0.134449	143	166	3	12419	CREB3L2,FOXRED2,TMEM117
GO:MF	calcium channel activity	GO:0005262	0.734509	0.134003	62	166	1	12419	ITPR2
GO:BP	sensory perception of sound	GO:0007605	0.73485	0.133801	82	166	2	12419	CLRN1,OTOGL
GO:BP	regulation of glucose import	GO:0046324	0.736964	0.132554	27	166	1	12419	APPL2
GO:BP	negative regulation of reproductive process	GO:2000242	0.736964	0.132554	27	166	1	12419	WEE2
GO:BP	negative regulation of cytokine-mediated signaling pathway	GO:0001960	0.736964	0.132554	27	166	1	12419	TTLL12
GO:BP	organic hydroxy compound catabolic process	GO:1901616	0.736964	0.132554	27	166	1	12419	PDXP
GO:BP	cerebellum morphogenesis	GO:0021587	0.736964	0.132554	27	166	1	12419	TTLL1
GO:BP	labyrinthine layer development	GO:0060711	0.736964	0.132554	27	166	1	12419	WNT2
GO:BP	regulation of interferon-beta production	GO:0032648	0.736964	0.132554	27	166	1	12419	POLR3B
GO:BP	interferon-beta production	GO:0032608	0.736964	0.132554	27	166	1	12419	POLR3B
GO:BP	negative regulation of synaptic transmission	GO:0050805	0.736964	0.132554	27	166	1	12419	BRAF
GO:BP	endosome organization	GO:0007032	0.736964	0.132554	27	166	1	12419	PHETA2
GO:BP	actin filament bundle organization	GO:0061572	0.736964	0.132554	83	166	2	12419	BRAF,PDXP
GO:CC	filopodium	GO:0030175	0.738441	0.131684	45	166	1	12419	TWF1
KEGG	Phagosome	KEGG:04145	0.739434	0.131101	86	166	1	12419	NCF4
KEGG	Endocytosis	KEGG:04144	0.739434	0.131101	158	166	2	12419	IL2RB,WASL
KEGG	Lysosome	KEGG:04142	0.739434	0.131101	88	166	1	12419	SPAM1
KEGG	Oocyte meiosis	KEGG:04114	0.739434	0.131101	74	166	1	12419	ITPR2
KEGG	ErbB signaling pathway	KEGG:04012	0.739434	0.131101	56	166	1	12419	BRAF
KEGG	Phosphatidylinositol signaling system	KEGG:04070	0.739434	0.131101	68	166	1	12419	ITPR2
KEGG	KEGG root term	KEGG:00000	0.739434	0.131101	3427	166	47	12419	ACSS3,ADSL,APAF1,BRAF,CHPT1,CHRM2,CMAS,CREB3L2,FGF6,GCAT,GTSE1,GXYLT1,HAL,IAPP,IL2RB,IQGAP3,ITPR2,KCNMB4,LGR5,LOC100222013,LOC100222415,LOC100222446,LOC100224417,LOC100225408,LTA4H,MCM5,NCF4,NDUFB2,NUP37,PDE6H,PHYH,PLA2G6,PMCH,POLR3B,POLR3H,SNU13,SPAM1,SSTR3,SYCP3,TAB1,TBXAS1,TSPO,VT1,VWF,WASL,WEE2,WNT2
KEGG	Biosynthesis of cofactors	KEGG:01240	0.739434	0.131101	81	166	1	12419	ADSL
KEGG	Oxidative phosphorylation	KEGG:00190	0.739434	0.131101	72	166	1	12419	NDUFB2
KEGG	FoxO signaling pathway	KEGG:04068	0.739434	0.131101	79	166	1	12419	BRAF
KEGG	Ribosome biogenesis in eukaryotes	KEGG:03008	0.739434	0.131101	46	166	1	12419	SNU13
KEGG	Pyrimidine metabolism	KEGG:00240	0.739434	0.131101	45	166	1	12419	LOC100222446
KEGG	mTOR signaling pathway	KEGG:04150	0.739434	0.131101	108	166	2	12419	BRAF,WNT2
KEGG	Peroxisome	KEGG:04146	0.739434	0.131101	55	166	1	12419	PHYH
KEGG	Influenza A	KEGG:05164	0.739434	0.131101	81	166	1	12419	APAF1
KEGG	Salmonella infection	KEGG:05132	0.739434	0.131101	159	166	2	12419	TAB1,WASL
KEGG	Progesterone-mediated oocyte maturation	KEGG:04914	0.739434	0.131101	58	166	1	12419	BRAF
KEGG	GnRH signaling pathway	KEGG:04912	0.739434	0.131101	57	166	1	12419	ITPR2
KEGG	Insulin signaling pathway	KEGG:04910	0.739434	0.131101	83	166	1	12419	BRAF
KEGG	Toll-like receptor signaling pathway	KEGG:04620	0.739434	0.131101	56	166	1	12419	TAB1
KEGG	C-type lectin receptor signaling pathway	KEGG:04625	0.739434	0.131101	60	166	1	12419	ITPR2
KEGG	Adherens junction	KEGG:04520	0.739434	0.131101	51	166	1	12419	WASL
KEGG	ECM-receptor interaction	KEGG:04512	0.739434	0.131101	47	166	1	12419	VWF
KEGG	Apelin signaling pathway	KEGG:04371	0.739434	0.131101	76	166	1	12419	ITPR2
KEGG	Wnt signaling pathway	KEGG:04310	0.739434	0.131101	109	166	2	12419	LGR5,WNT2
KEGG	MAPK signaling pathway	KEGG:04010	0.739434	0.131101	185	166	3	12419	BRAF,FGF6,TAB1
KEGG	Gap junction	KEGG:04540	0.739434	0.131101	70	166	1	12419	ITPR2
KEGG	Spliceosome	KEGG:03040	0.739434	0.131101	84	166	1	12419	SNU13
GO:BP	signal release	GO:0023061	0.740968	0.130201	210	166	4	12419	BRAF,CHRM2,PICK1,PLA2G6
GO:BP	positive regulation of axonogenesis	GO:0050772	0.740968	0.130201	28	166	1	12419	BRAF
GO:BP	photoreceptor cell maintenance	GO:0045494	0.740968	0.130201	28	166	1	12419	CLRN1
GO:BP	glycerolipid catabolic process	GO:0046503	0.740968	0.130201	28	166	1	12419	PLA2G6
GO:BP	chromatin organization involved in negative regulation of transcription	GO:0097549	0.740968	0.130201	28	166	1	12419	PPHLN1
GO:BP	endothelial cell apoptotic process	GO:0072577	0.740968	0.130201	28	166	1	12419	BRAF
GO:BP	visual behavior	GO:0007632	0.740968	0.130201	28	166	1	12419	BRAF
GO:BP	phenol-containing compound biosynthetic process	GO:0046189	0.740968	0.130201	28	166	1	12419	GPR37
GO:BP	mitochondrial RNA metabolic process	GO:0000959	0.740968	0.130201	28	166	1	12419	YARS2
GO:BP	positive regulation of response to wounding	GO:1903036	0.740968	0.130201	28	166	1	12419	BRAF
GO:BP	regulation of TORC1 signaling	GO:1903432	0.740968	0.130201	28	166	1	12419	C1AH12ORF66
GO:BP	lung epithelium development	GO:0060428	0.740968	0.130201	28	166	1	12419	WNT2
GO:BP	dendritic spine organization	GO:0097061	0.740968	0.130201	28	166	1	12419	WASL
GO:BP	hair cell differentiation	GO:0035315	0.740968	0.130201	28	166	1	12419	CLRN1
GO:BP	head morphogenesis	GO:0060323	0.740968	0.130201	28	166	1	12419	BRAF
GO:BP	somatic stem cell population maintenance	GO:0035019	0.740968	0.130201	28	166	1	12419	BRAF
GO:BP	regulation of receptor internalization	GO:0002090	0.740968	0.130201	28	166	1	12419	NTF3
GO:BP	T cell selection	GO:0045058	0.740968	0.130201	28	166	1	12419	BRAF
GO:BP	cholesterol efflux	GO:0033344	0.740968	0.130201	28	166	1	12419	SREBF2
GO:BP	hindbrain morphogenesis	GO:0021575	0.740968	0.130201	28	166	1	12419	TTLL1
KEGG	Adrenergic signaling in cardiomyocytes	KEGG:04261	0.741218	0.130054	94	166	1	12419	CREB3L2
KEGG	RNA transport	KEGG:03013	0.741218	0.130054	94	166	1	12419	NUP37
GO:BP	response to wounding	GO:0009611	0.741817	0.129703	212	166	4	12419	BRAF,CELSR1,ELK3,VWF
GO:MF	phosphoric diester hydrolase activity	GO:0008081	0.742713	0.129179	64	166	1	12419	PDE6H
GO:MF	cation binding	GO:0043169	0.742713	0.129179	1832	166	24	12419	BRAF,CELSR1,CPM,LOC100222415,LOC100222446,LOC100225408,LOC101234089,LTA4H,MCM10,METAP2,MICALL1,PAH,PDXP,PHYH,POLR3B,PVALB,STAB2,STK38L,TBXAS1,THAP5,TRIM24,WEE2,XPNPEP3,ZCRB1
GO:MF	DNA-binding transcription factor activity, RNA polymerase II-specific	GO:0000981	0.742713	0.129179	460	166	6	12419	CREB3L2,DBX2,ELK3,NFYB,PRDM4,SREBF2
GO:MF	small GTPase binding	GO:0031267	0.742713	0.129179	145	166	2	12419	IQGAP3,MICALL1
GO:MF	peptidase activity	GO:0008233	0.742713	0.129179	382	166	5	12419	CPM,LOC100225408,LTA4H,METAP2,XPNPEP3
GO:BP	regulated exocytosis	GO:0045055	0.746271	0.127104	86	166	2	12419	BRAF,CHRM2
GO:BP	negative regulation of TOR signaling	GO:0032007	0.746271	0.127104	29	166	1	12419	C1AH12ORF66
GO:BP	thymus development	GO:0048538	0.746271	0.127104	29	166	1	12419	BRAF
GO:BP	cardiac muscle hypertrophy	GO:0003300	0.746271	0.127104	29	166	1	12419	TWF1
GO:BP	non-canonical Wnt signaling pathway	GO:0035567	0.746271	0.127104	29	166	1	12419	CELSR1
GO:BP	motile cilium assembly	GO:0044458	0.746271	0.127104	29	166	1	12419	TTLL1
GO:BP	nucleoside monophosphate biosynthetic process	GO:0009124	0.746271	0.127104	29	166	1	12419	ADSL
GO:BP	positive regulation of type I interferon production	GO:0032481	0.746271	0.127104	29	166	1	12419	POLR3B
GO:BP	regulation of telomerase activity	GO:0051972	0.746271	0.127104	29	166	1	12419	CCT2
GO:BP	spindle localization	GO:0051653	0.746271	0.127104	29	166	1	12419	WASL
GO:BP	regulation of endocytosis	GO:0030100	0.746271	0.127104	86	166	2	12419	APPL2,NTF3
GO:BP	intrinsic apoptotic signaling pathway in response to endoplasmic reticulum stress	GO:0070059	0.746271	0.127104	29	166	1	12419	TMEM117
GO:BP	insulin secretion	GO:0030073	0.746271	0.127104	86	166	2	12419	PICK1,PLA2G6
GO:BP	mRNA-containing ribonucleoprotein complex export from nucleus	GO:0071427	0.746271	0.127104	29	166	1	12419	LOC105759175
GO:BP	negative regulation of response to cytokine stimulus	GO:0060761	0.746271	0.127104	29	166	1	12419	TTLL12
GO:BP	response to extracellular stimulus	GO:0009991	0.746271	0.127104	149	166	3	12419	APPL2,C1AH12ORF66,SREBF2
GO:BP	mRNA export from nucleus	GO:0006406	0.746271	0.127104	29	166	1	12419	LOC105759175
GO:MF	ATP binding	GO:0005524	0.747515	0.12638	1003	166	13	12419	ADCK2,APAF1,BRAF,CCT2,DMC1,MCM5,RECQL,STK38L,TTLL1,TTLL12,TWF1,WEE2,YARS2
GO:BP	lipid catabolic process	GO:0016042	0.74827	0.125941	150	166	3	12419	NAGA,PHYH,PLA2G6
GO:MF	ligand-gated cation channel activity	GO:0099094	0.749057	0.125485	67	166	1	12419	ITPR2
GO:MF	carboxylic acid binding	GO:0031406	0.749057	0.125485	67	166	1	12419	PHYH
GO:MF	integrin binding	GO:0005178	0.749057	0.125485	67	166	1	12419	VWF
GO:BP	insulin secretion involved in cellular response to glucose stimulus	GO:0035773	0.750199	0.124823	30	166	1	12419	PLA2G6
GO:BP	response to reactive oxygen species	GO:0000302	0.750199	0.124823	88	166	2	12419	GPR37,ZNF277
GO:BP	cellular response to starvation	GO:0009267	0.750199	0.124823	88	166	2	12419	C1AH12ORF66,SREBF2
GO:BP	transmission of nerve impulse	GO:0019226	0.750199	0.124823	30	166	1	12419	KCNMB4
GO:BP	negative regulation of peptidyl-tyrosine phosphorylation	GO:0050732	0.750199	0.124823	30	166	1	12419	NTF3
GO:BP	protein localization to vacuole	GO:0072665	0.750199	0.124823	30	166	1	12419	C1AH12ORF66
GO:BP	regulation of muscle adaptation	GO:0043502	0.750199	0.124823	30	166	1	12419	TWF1
GO:BP	response to amino acid starvation	GO:1990928	0.750199	0.124823	30	166	1	12419	C1AH12ORF66
GO:BP	positive regulation of actin filament bundle assembly	GO:0032233	0.750199	0.124823	30	166	1	12419	BRAF
GO:BP	superoxide metabolic process	GO:0006801	0.750199	0.124823	30	166	1	12419	NCF4
GO:BP	negative regulation of G1/S transition of mitotic cell cycle	GO:2000134	0.750199	0.124823	30	166	1	12419	FBXO7
GO:BP	cellular response to amino acid starvation	GO:0034198	0.750199	0.124823	30	166	1	12419	C1AH12ORF66
GO:BP	cardiac muscle cell proliferation	GO:0060038	0.750199	0.124823	30	166	1	12419	WNT2
GO:BP	myofibril assembly	GO:0030239	0.750199	0.124823	30	166	1	12419	LMOD2
GO:BP	positive regulation of transferase activity	GO:0051347	0.750199	0.124823	283	166	5	12419	CCT2,IQGAP3,NTF3,PDE6H,TAB1
GO:BP	adenylate cyclase-inhibiting G protein-coupled receptor signaling pathway	GO:0007193	0.750199	0.124823	30	166	1	12419	GPR37
GO:BP	activation of cysteine-type endopeptidase activity involved in apoptotic process	GO:0006919	0.750199	0.124823	30	166	1	12419	APAF1
GO:BP	mesenchymal cell proliferation	GO:0010463	0.750199	0.124823	30	166	1	12419	WNT2
GO:BP	regulation of cell division	GO:0051302	0.752587	0.123444	89	166	2	12419	FGF6,PDXP
GO:BP	vesicle-mediated transport in synapse	GO:0099003	0.752587	0.123444	89	166	2	12419	BRAF,CHRM2
GO:BP	neuron projection organization	GO:0106027	0.752832	0.123302	31	166	1	12419	WASL
GO:BP	positive regulation of peptide hormone secretion	GO:0090277	0.752832	0.123302	31	166	1	12419	PLA2G6
GO:BP	chromosome organization involved in meiotic cell cycle	GO:0070192	0.752832	0.123302	31	166	1	12419	SYCE3
GO:BP	regulation of neurogenesis	GO:0050767	0.752832	0.123302	153	166	3	12419	APPL2,BRAF,WNT2
GO:BP	regulation of phagocytosis	GO:0050764	0.752832	0.123302	31	166	1	12419	APPL2
GO:BP	sensory perception of light stimulus	GO:0050953	0.752832	0.123302	90	166	2	12419	CLRN1,PDE6H
GO:BP	sensory perception of mechanical stimulus	GO:0050954	0.752832	0.123302	90	166	2	12419	CLRN1,OTOGL
GO:BP	ER-nucleus signaling pathway	GO:0006984	0.752832	0.123302	31	166	1	12419	SREBF2
GO:BP	negative regulation of cell cycle G1/S phase transition	GO:1902807	0.752832	0.123302	31	166	1	12419	FBXO7
GO:BP	smoothened signaling pathway	GO:0007224	0.752832	0.123302	90	166	2	12419	IFT27,TTC26
GO:BP	striated muscle hypertrophy	GO:0014897	0.752832	0.123302	31	166	1	12419	TWF1
GO:BP	regulation of morphogenesis of a branching structure	GO:0060688	0.752832	0.123302	31	166	1	12419	WNT2
GO:BP	muscle hypertrophy	GO:0014896	0.752832	0.123302	31	166	1	12419	TWF1
GO:BP	positive regulation of peptide secretion	GO:0002793	0.752832	0.123302	31	166	1	12419	PLA2G6
GO:BP	regulation of toll-like receptor signaling pathway	GO:0034121	0.752832	0.123302	31	166	1	12419	APPL2
GO:BP	striated muscle cell development	GO:0055002	0.752832	0.123302	31	166	1	12419	LMOD2
GO:BP	regulation of substrate adhesion-dependent cell spreading	GO:1900024	0.752832	0.123302	31	166	1	12419	BRAF
GO:BP	reactive oxygen species metabolic process	GO:0072593	0.752832	0.123302	90	166	2	12419	NCF4,TSPO
GO:CC	transferase complex	GO:1990234	0.753984	0.122638	410	166	6	12419	FBXO7,GPR37,POLR3B,POLR3H,PRDM4,YEATS4
GO:CC	cortical cytoskeleton	GO:0030863	0.753984	0.122638	47	166	1	12419	WASL
GO:BP	regulation of neurotransmitter levels	GO:0001505	0.756955	0.12093	91	166	2	12419	BRAF,CHRM2
GO:BP	neurotransmitter transport	GO:0006836	0.756955	0.12093	91	166	2	12419	BRAF,CHRM2
GO:CC	polymeric cytoskeletal fiber	GO:0099513	0.757544	0.120592	265	166	4	12419	CCT2,LMOD2,MAP6D1,TTLL1
GO:CC	sperm flagellum	GO:0036126	0.759146	0.119675	50	166	1	12419	IFT27
GO:CC	early endosome membrane	GO:0031901	0.759146	0.119675	51	166	1	12419	APPL2
GO:CC	phagocytic vesicle	GO:0045335	0.759146	0.119675	51	166	1	12419	APPL2
GO:CC	extrinsic component of plasma membrane	GO:0019897	0.759146	0.119675	52	166	1	12419	WNT2
GO:CC	transferase complex, transferring phosphorus-containing groups	GO:0061695	0.759146	0.119675	122	166	2	12419	POLR3B,POLR3H
GO:CC	voltage-gated potassium channel complex	GO:0008076	0.759146	0.119675	52	166	1	12419	KCNMB4
GO:CC	cell cortex	GO:0005938	0.759146	0.119675	126	166	2	12419	ITPR2,WASL
GO:CC	site of DNA damage	GO:0090734	0.759146	0.119675	49	166	1	12419	HELB
GO:CC	9+2 motile cilium	GO:0097729	0.759146	0.119675	52	166	1	12419	IFT27
GO:CC	methyltransferase complex	GO:0034708	0.759146	0.119675	52	166	1	12419	PRDM4
GO:CC	U2-type spliceosomal complex	GO:0005684	0.759146	0.119675	52	166	1	12419	SNU13
GO:CC	membrane-enclosed lumen	GO:0031974	0.760696	0.118789	2454	166	33	12419	ACSS3,COG5,CREB3L2,ELK3,FBXO7,FOXRED2,GCAT,GRAP2,HELB,INTS13,ITPR2,LGR5,LTA4H,MCM10,MCM5,MTERF2,NFYB,NUP37,PHLDA1,POLR3H,PPHLN1,PRDM4,RECQL,RXYLT1,SNU13,SREBF2,TAB1,THAP5,TRIM24,TWF1,WEE2,YARS2,YEATS4
GO:CC	organelle lumen	GO:0043233	0.760696	0.118789	2454	166	33	12419	ACSS3,COG5,CREB3L2,ELK3,FBXO7,FOXRED2,GCAT,GRAP2,HELB,INTS13,ITPR2,LGR5,LTA4H,MCM10,MCM5,MTERF2,NFYB,NUP37,PHLDA1,POLR3H,PPHLN1,PRDM4,RECQL,RXYLT1,SNU13,SREBF2,TAB1,THAP5,TRIM24,TWF1,WEE2,YARS2,YEATS4
GO:CC	intracellular organelle lumen	GO:0070013	0.760696	0.118789	2454	166	33	12419	ACSS3,COG5,CREB3L2,ELK3,FBXO7,FOXRED2,GCAT,GRAP2,HELB,INTS13,ITPR2,LGR5,LTA4H,MCM10,MCM5,MTERF2,NFYB,NUP37,PHLDA1,POLR3H,PPHLN1,PRDM4,RECQL,RXYLT1,SNU13,SREBF2,TAB1,THAP5,TRIM24,TWF1,WEE2,YARS2,YEATS4
GO:CC	microtubule organizing center	GO:0005815	0.760696	0.118789	427	166	6	12419	CBY1,IFT27,PLA2G6,POLR3H,TTC26,TTLL1
GO:BP	response to biotic stimulus	GO:0009607	0.761145	0.118533	428	166	7	12419	APPL2,PLA2G6,POLR3B,ST13,STAB2,TTLL12,WASL
GO:BP	production of molecular mediator involved in inflammatory response	GO:0002532	0.761145	0.118533	32	166	1	12419	APPL2
GO:BP	regulation of stem cell differentiation	GO:2000736	0.761145	0.118533	32	166	1	12419	PUS7
GO:BP	chromatin organization involved in regulation of transcription	GO:0034401	0.761145	0.118533	32	166	1	12419	PPHLN1
GO:BP	midbrain development	GO:0030901	0.761145	0.118533	32	166	1	12419	WNT2
GO:BP	small molecule metabolic process	GO:0044281	0.761145	0.118533	851	166	13	12419	ADSL,APPL2,CHPT1,CMAS,GCAT,HAL,LTA4H,OTOGL,PAH,PDXP,PHYH,TBXAS1,YARS2
GO:BP	positive regulation of response to external stimulus	GO:0032103	0.761145	0.118533	157	166	3	12419	BRAF,NTF3,POLR3B
GO:BP	TORC1 signaling	GO:0038202	0.761145	0.118533	32	166	1	12419	C1AH12ORF66
GO:BP	mitotic cell cycle	GO:0000278	0.761145	0.118533	428	166	7	12419	APPL2,FBXO7,INTS13,IQGAP3,PDXP,TTLL12,WEE2
GO:BP	regulation of cellular response to insulin stimulus	GO:1900076	0.761145	0.118533	32	166	1	12419	APPL2
GO:BP	negative regulation of neuron death	GO:1901215	0.761145	0.118533	92	166	2	12419	BRAF,FBXO7
GO:MF	purine ribonucleoside triphosphate binding	GO:0035639	0.762082	0.117998	1247	166	16	12419	ADCK2,APAF1,BRAF,CCT2,DMC1,IFT27,MCM5,RASD2,RECQL,SEPTIN3,STK38L,TTLL1,TTLL12,TWF1,WEE2,YARS2
GO:BP	cardiac muscle tissue growth	GO:0055017	0.765341	0.116145	33	166	1	12419	WNT2
GO:BP	mitochondrial translation	GO:0032543	0.765341	0.116145	33	166	1	12419	YARS2
GO:BP	respiratory gaseous exchange by respiratory system	GO:0007585	0.765341	0.116145	33	166	1	12419	TTLL1
GO:BP	regulation of cholesterol transport	GO:0032374	0.765341	0.116145	33	166	1	12419	SREBF2
GO:BP	regulation of sterol transport	GO:0032371	0.765341	0.116145	33	166	1	12419	SREBF2
GO:BP	hormone-mediated signaling pathway	GO:0009755	0.765341	0.116145	93	166	2	12419	APPL2,SSTR3
GO:BP	vitamin metabolic process	GO:0006766	0.765341	0.116145	33	166	1	12419	PDXP
GO:BP	regulation of pri-miRNA transcription by RNA polymerase II	GO:1902893	0.765341	0.116145	33	166	1	12419	SREBF2
GO:BP	cellular aldehyde metabolic process	GO:0006081	0.765341	0.116145	33	166	1	12419	PDXP
GO:BP	response to starvation	GO:0042594	0.765341	0.116145	94	166	2	12419	C1AH12ORF66,SREBF2
GO:BP	neural precursor cell proliferation	GO:0061351	0.765341	0.116145	93	166	2	12419	APPL2,WNT2
GO:BP	regulation of embryonic development	GO:0045995	0.765341	0.116145	33	166	1	12419	WNT2
GO:BP	positive regulation of protein kinase activity	GO:0045860	0.765341	0.116145	225	166	4	12419	IQGAP3,NTF3,PDE6H,TAB1
GO:BP	regulation of telomere maintenance via telomerase	GO:0032210	0.765341	0.116145	33	166	1	12419	CCT2
GO:BP	positive regulation of telomere maintenance	GO:0032206	0.765341	0.116145	33	166	1	12419	CCT2
GO:BP	pri-miRNA transcription by RNA polymerase II	GO:0061614	0.765341	0.116145	33	166	1	12419	SREBF2
GO:BP	ribonucleoside monophosphate metabolic process	GO:0009161	0.765341	0.116145	33	166	1	12419	ADSL
GO:BP	regulation of cell development	GO:0060284	0.766998	0.115206	227	166	4	12419	APPL2,BRAF,WEE2,WNT2
GO:BP	endomembrane system organization	GO:0010256	0.766998	0.115206	227	166	4	12419	MICALL1,PHETA2,SPAM1,WASL
GO:BP	protein-containing complex subunit organization	GO:0043933	0.767598	0.114866	787	166	12	12419	APPL2,C1AH12ORF73,CCT2,LMOD2,MAP6D1,NDUFA12,NDUFB2,PDXP,SAMM50,SNU13,TWF1,WASL
GO:BP	MAPK cascade	GO:0000165	0.76903	0.114057	365	166	6	12419	BRAF,GPR37,IQGAP3,NTF3,PDE6H,TAB1
GO:CC	9+0 non-motile cilium	GO:0097731	0.770146	0.113427	56	166	1	12419	PHYH
GO:CC	inner mitochondrial membrane protein complex	GO:0098800	0.770146	0.113427	56	166	1	12419	NDUFB2
GO:CC	cellular anatomical entity	GO:0110165	0.770146	0.113427	9414	166	126	12419	ACSS3,ADSL,APAF1,APPL2,ASZ1,BRAF,C1AH12ORF66,C1AH12ORF73,C1QTNF6,CBY1,CCDC107,CCT2,CELSR1,CENPM,CHPT1,CHRM2,CLRN1,COG5,CREB3L2,DMC1,ELK3,ERP27,FBXO7,FOXRED2,GCAT,GPR37,GPR85,GRAP2,GTSE1,HAL,HELB,HMGA2,IAPP,IFT27,IL2RB,INTS13,IQGAP3,ITPR2,KCNMB4,KDELR3,LGR5,LMOD2,LOC100218635,LOC100218691,LOC100220543,LOC100221944,LOC100222415,LOC100224417,LOC100225408,LOC100229115,LOC105758589,LSMEM1,LTA4H,MAP6D1…
GO:BP	nucleobase-containing compound transport	GO:0015931	0.770688	0.113121	95	166	2	12419	LOC105758589,LOC105759175
GO:BP	regulation of protein kinase activity	GO:0045859	0.770762	0.11308	367	166	6	12419	FBXO7,IQGAP3,NTF3,PDE6H,TAB1,WEE2
GO:BP	establishment of tissue polarity	GO:0007164	0.770762	0.11308	34	166	1	12419	CELSR1
GO:BP	protein localization to endoplasmic reticulum	GO:0070972	0.770762	0.11308	34	166	1	12419	KDELR3
GO:BP	establishment of planar polarity	GO:0001736	0.770762	0.11308	34	166	1	12419	CELSR1
GO:BP	regulation of secretion by cell	GO:1903530	0.770762	0.11308	229	166	4	12419	BRAF,CHRM2,PICK1,PLA2G6
GO:BP	protein homotetramerization	GO:0051289	0.770762	0.11308	34	166	1	12419	APPL2
GO:BP	glycerophospholipid biosynthetic process	GO:0046474	0.770762	0.11308	96	166	2	12419	CHPT1,PLA2G6
GO:BP	feeding behavior	GO:0007631	0.770762	0.11308	34	166	1	12419	PMCH
GO:BP	fatty acid metabolic process	GO:0006631	0.770762	0.11308	161	166	3	12419	APPL2,PHYH,TBXAS1
GO:BP	cellular response to nutrient levels	GO:0031669	0.770762	0.11308	96	166	2	12419	C1AH12ORF66,SREBF2
GO:BP	morphogenesis of embryonic epithelium	GO:0016331	0.770762	0.11308	96	166	2	12419	CELSR1,WNT2
GO:BP	tRNA aminoacylation for protein translation	GO:0006418	0.770762	0.11308	34	166	1	12419	YARS2
GO:MF	enzyme binding	GO:0019899	0.772172	0.112286	1023	166	13	12419	CCT2,FBXO7,GPR37,IQGAP3,MCM10,MICALL1,PICK1,PRDM4,PUS7,SNU13,THAP5,TPRKB,VWF
GO:BP	face development	GO:0060324	0.778582	0.108696	35	166	1	12419	BRAF
GO:BP	regulation of epidermal growth factor receptor signaling pathway	GO:0042058	0.778582	0.108696	35	166	1	12419	PDE6H
GO:BP	CD4-positive, alpha-beta T cell differentiation	GO:0043367	0.778582	0.108696	35	166	1	12419	BRAF
GO:BP	stem cell population maintenance	GO:0019827	0.778582	0.108696	97	166	2	12419	BRAF,MED21
GO:BP	retina homeostasis	GO:0001895	0.778582	0.108696	35	166	1	12419	CLRN1
GO:BP	unsaturated fatty acid metabolic process	GO:0033559	0.778582	0.108696	35	166	1	12419	TBXAS1
GO:BP	body morphogenesis	GO:0010171	0.778582	0.108696	35	166	1	12419	BRAF
GO:BP	DNA methylation or demethylation	GO:0044728	0.778582	0.108696	35	166	1	12419	ASZ1
GO:BP	cerebellar cortex development	GO:0021695	0.778582	0.108696	35	166	1	12419	TTLL1
GO:BP	positive regulation of neurogenesis	GO:0050769	0.778582	0.108696	97	166	2	12419	BRAF,WNT2
KEGG	Protein processing in endoplasmic reticulum	KEGG:04141	0.779319	0.108285	108	166	1	12419	LOC100225408
GO:CC	potassium channel complex	GO:0034705	0.779386	0.108247	58	166	1	12419	KCNMB4
GO:CC	vesicle	GO:0031982	0.779386	0.108247	823	166	11	12419	APPL2,CLRN1,GRAP2,KDELR3,MAP6D1,MICALL1,NCF4,PHETA2,REP15,TOM1,VWF
GO:CC	nuclear lumen	GO:0031981	0.779386	0.108247	2263	166	30	12419	COG5,CREB3L2,ELK3,FBXO7,GCAT,GRAP2,HELB,INTS13,ITPR2,LGR5,LTA4H,MCM10,MCM5,NFYB,NUP37,PHLDA1,POLR3H,PPHLN1,PRDM4,RECQL,RXYLT1,SNU13,SREBF2,TAB1,THAP5,TRIM24,TWF1,WEE2,YARS2,YEATS4
GO:CC	centriole	GO:0005814	0.779386	0.108247	61	166	1	12419	CBY1
GO:CC	microtubule cytoskeleton	GO:0015630	0.779386	0.108247	678	166	9	12419	CBY1,CCT2,CLRN1,IFT27,MAP6D1,PLA2G6,POLR3H,TTC26,TTLL1
GO:CC	histone acetyltransferase complex	GO:0000123	0.779386	0.108247	59	166	1	12419	YEATS4
GO:CC	nucleus	GO:0005634	0.779386	0.108247	3536	166	47	12419	APPL2,COG5,CREB3L2,DMC1,ELK3,FBXO7,GCAT,GRAP2,HELB,HMGA2,INTS13,ITPR2,LGR5,LOC100218635,LOC100218691,LOC100220543,LOC100221944,LOC100224417,LTA4H,MCM10,MCM5,MED21,NFYB,NUP37,PHLDA1,PMCH,POLR3B,POLR3H,PPHLN1,PRDM4,PUS7,PYROXD1,RECQL,RXYLT1,SNU13,SREBF2,TAB1,TEF,THAP5,TPRKB,TRIM24,TWF1,WASL,WEE2,YARS2,YEATS4,ZCRB1
GO:CC	protein-containing complex	GO:0032991	0.779386	0.108247	2644	166	35	12419	ADSL,APAF1,C1AH12ORF66,C1QTNF6,CCT2,COG5,FBXO7,GPR37,HELB,IFT27,ITPR2,KCNMB4,LOC100218635,LOC100218691,LOC100220543,LOC100221944,LOC100224417,MCM5,MED21,NCF4,NDUFB2,NFYB,NUP37,POLR3B,POLR3H,PRDM4,RINT1,SAMM50,SNU13,SREBF2,TOMM22,TPRKB,TTC26,YEATS4,ZCRB1
GO:CC	nucleoplasm	GO:0005654	0.779386	0.108247	2045	166	27	12419	COG5,CREB3L2,ELK3,FBXO7,GCAT,GRAP2,INTS13,ITPR2,LGR5,LTA4H,MCM10,MCM5,NFYB,NUP37,PHLDA1,POLR3H,PPHLN1,PRDM4,RECQL,RXYLT1,SREBF2,TAB1,THAP5,TRIM24,WEE2,YARS2,YEATS4
KEGG	Cytokine-cytokine receptor interaction	KEGG:04060	0.779967	0.107924	112	166	1	12419	IL2RB
GO:BP	positive regulation of epithelial cell proliferation	GO:0050679	0.780688	0.107523	98	166	2	12419	IQGAP3,WNT2
GO:BP	maintenance of cell number	GO:0098727	0.780688	0.107523	98	166	2	12419	BRAF,MED21
GO:BP	vesicle-mediated transport	GO:0016192	0.781271	0.107198	726	166	11	12419	APPL2,BRAF,CHRM2,COG5,CREB3L2,KDELR3,MICALL1,NCF4,NTF3,PHETA2,RINT1
GO:BP	negative regulation of immune system process	GO:0002683	0.782381	0.106582	165	166	3	12419	FBXO7,TTLL12,WASL
GO:BP	positive regulation of chromosome organization	GO:2001252	0.783334	0.106053	99	166	2	12419	CCT2,PPHLN1
GO:BP	wound healing	GO:0042060	0.783334	0.106053	166	166	3	12419	CELSR1,ELK3,VWF
GO:BP	negative regulation of autophagy	GO:0010507	0.783334	0.106053	36	166	1	12419	TSPO
GO:BP	heart growth	GO:0060419	0.783334	0.106053	36	166	1	12419	WNT2
GO:BP	long-term synaptic potentiation	GO:0060291	0.783334	0.106053	36	166	1	12419	BRAF
GO:BP	protein localization to cilium	GO:0061512	0.783334	0.106053	36	166	1	12419	TTC26
GO:BP	negative regulation of response to biotic stimulus	GO:0002832	0.783334	0.106053	36	166	1	12419	TTLL12
GO:BP	glucose import	GO:0046323	0.783334	0.106053	36	166	1	12419	APPL2
GO:BP	lymphocyte migration	GO:0072676	0.783334	0.106053	36	166	1	12419	WASL
GO:BP	positive regulation of cell division	GO:0051781	0.783334	0.106053	36	166	1	12419	FGF6
GO:BP	regulation of glucose transmembrane transport	GO:0010827	0.783334	0.106053	36	166	1	12419	APPL2
GO:BP	immune response	GO:0006955	0.784716	0.105288	516	166	8	12419	APPL2,BRAF,NFAM1,PLA2G6,POLR3B,STAB2,TTLL1,TTLL12
GO:BP	behavior	GO:0007610	0.785812	0.104681	305	166	5	12419	BRAF,CELSR1,GPR37,PMCH,RASD2
GO:BP	endosomal transport	GO:0016197	0.786099	0.104523	100	166	2	12419	MICALL1,PHETA2
GO:BP	lipid modification	GO:0030258	0.786099	0.104523	100	166	2	12419	APPL2,PHYH
GO:BP	ribonucleoprotein complex localization	GO:0071166	0.787714	0.103631	37	166	1	12419	LOC105759175
GO:BP	regulation of epithelial cell apoptotic process	GO:1904035	0.787714	0.103631	37	166	1	12419	BRAF
GO:BP	aorta development	GO:0035904	0.787714	0.103631	37	166	1	12419	TAB1
GO:BP	cellular response to alcohol	GO:0097306	0.787714	0.103631	37	166	1	12419	ITPR2
GO:BP	regulation of ATP metabolic process	GO:1903578	0.787714	0.103631	37	166	1	12419	TSPO
GO:BP	regulation of protein stability	GO:0031647	0.787714	0.103631	168	166	3	12419	CCT2,FBXO7,TRIM24
GO:BP	tRNA aminoacylation	GO:0043039	0.787714	0.103631	37	166	1	12419	YARS2
GO:BP	regulation of telomere maintenance via telomere lengthening	GO:1904356	0.787714	0.103631	37	166	1	12419	CCT2
GO:BP	positive regulation of intracellular signal transduction	GO:1902533	0.787714	0.103631	448	166	7	12419	BRAF,GPR37,IQGAP3,NTF3,PDE6H,TAB1,VWF
GO:BP	regulation of hemopoiesis	GO:1903706	0.787714	0.103631	168	166	3	12419	BRAF,FBXO7,NFAM1
GO:BP	ribonucleoprotein complex export from nucleus	GO:0071426	0.787714	0.103631	37	166	1	12419	LOC105759175
GO:CC	cell-cell junction	GO:0005911	0.788614	0.103135	225	166	3	12419	IQGAP3,PDXP,TWF1
GO:CC	synaptic membrane	GO:0097060	0.788614	0.103135	145	166	2	12419	CHRM2,PICK1
GO:CC	mitochondrial matrix	GO:0005759	0.788614	0.103135	143	166	2	12419	ACSS3,MTERF2
GO:CC	ubiquitin ligase complex	GO:0000151	0.788614	0.103135	144	166	2	12419	FBXO7,GPR37
GO:CC	acetyltransferase complex	GO:1902493	0.788614	0.103135	65	166	1	12419	YEATS4
GO:CC	protein acetyltransferase complex	GO:0031248	0.788614	0.103135	65	166	1	12419	YEATS4
GO:CC	cytoplasmic vesicle membrane	GO:0030659	0.788728	0.103073	150	166	2	12419	APPL2,KDELR3
GO:CC	organelle subcompartment	GO:0031984	0.788728	0.103073	620	166	8	12419	CREB3L2,ITPR2,KDELR3,LGR5,PHETA2,SLC37A3,SREBF2,TBXAS1
GO:CC	external encapsulating structure	GO:0030312	0.788728	0.103073	151	166	2	12419	VWF,WNT2
GO:CC	centriolar satellite	GO:0034451	0.788728	0.103073	66	166	1	12419	PLA2G6
GO:CC	extracellular matrix	GO:0031012	0.788728	0.103073	151	166	2	12419	VWF,WNT2
GO:CC	integral component of plasma membrane	GO:0005887	0.788728	0.103073	471	166	6	12419	CHRM2,KCNMB4,LGR5,NCF4,STAB2,VT1
GO:CC	microbody	GO:0042579	0.788728	0.103073	69	166	1	12419	PHYH
GO:CC	peroxisome	GO:0005777	0.788728	0.103073	69	166	1	12419	PHYH
GO:MF	calcium ion transmembrane transporter activity	GO:0015085	0.791252	0.101685	75	166	1	12419	ITPR2
GO:MF	transcription regulator activity	GO:0140110	0.791252	0.101685	801	166	10	12419	ASCL4,CREB3L2,DBX2,ELK3,MED21,NFYB,PRDM4,SREBF2,TEF,TRIM24
GO:BP	actomyosin structure organization	GO:0031032	0.793221	0.100606	102	166	2	12419	BRAF,LMOD2
GO:BP	positive regulation of cell morphogenesis involved in differentiation	GO:0010770	0.793221	0.100606	38	166	1	12419	BRAF
GO:BP	innate immune response	GO:0045087	0.793221	0.100606	170	166	3	12419	APPL2,POLR3B,TTLL12
GO:BP	meiotic chromosome segregation	GO:0045132	0.793221	0.100606	38	166	1	12419	SYCE3
GO:BP	Wnt signaling pathway	GO:0016055	0.793221	0.100606	240	166	4	12419	CBY1,CELSR1,LGR5,WNT2
GO:BP	neuropeptide signaling pathway	GO:0007218	0.793221	0.100606	38	166	1	12419	GPR37
GO:BP	regulation of establishment of protein localization	GO:0070201	0.793221	0.100606	239	166	4	12419	CCT2,MIEF1,PICK1,PLA2G6
GO:BP	lamellipodium assembly	GO:0030032	0.793221	0.100606	38	166	1	12419	CLRN1
GO:BP	cardiac muscle tissue morphogenesis	GO:0055008	0.793221	0.100606	38	166	1	12419	WNT2
GO:BP	protein processing	GO:0016485	0.793221	0.100606	103	166	2	12419	METAP2,XPNPEP3
GO:BP	branching morphogenesis of an epithelial tube	GO:0048754	0.793221	0.100606	103	166	2	12419	CELSR1,WNT2
GO:BP	regulation of hormone secretion	GO:0046883	0.793221	0.100606	102	166	2	12419	PICK1,PLA2G6
GO:BP	regulation of fibroblast proliferation	GO:0048145	0.793221	0.100606	38	166	1	12419	WNT2
GO:BP	neural tube development	GO:0021915	0.793221	0.100606	103	166	2	12419	CBY1,CELSR1
GO:BP	amino acid activation	GO:0043038	0.793221	0.100606	38	166	1	12419	YARS2
GO:CC	cellular_component	GO:0005575	0.795264	0.0994887	9503	166	126	12419	ACSS3,ADSL,APAF1,APPL2,ASZ1,BRAF,C1AH12ORF66,C1AH12ORF73,C1QTNF6,CBY1,CCDC107,CCT2,CELSR1,CENPM,CHPT1,CHRM2,CLRN1,COG5,CREB3L2,DMC1,ELK3,ERP27,FBXO7,FOXRED2,GCAT,GPR37,GPR85,GRAP2,GTSE1,HAL,HELB,HMGA2,IAPP,IFT27,IL2RB,INTS13,IQGAP3,ITPR2,KCNMB4,KDELR3,LGR5,LMOD2,LOC100218635,LOC100218691,LOC100220543,LOC100221944,LOC100222415,LOC100224417,LOC100225408,LOC100229115,LOC105758589,LSMEM1,LTA4H,MAP6D1…
GO:CC	kinetochore	GO:0000776	0.795264	0.0994887	71	166	1	12419	NUP37
GO:CC	integral component of organelle membrane	GO:0031301	0.79664	0.0987381	156	166	2	12419	SLC37A3,SREBF2
GO:MF	transmembrane receptor protein tyrosine kinase activity	GO:0004714	0.797109	0.0984822	77	166	1	12419	WEE2
GO:MF	GTPase binding	GO:0051020	0.797109	0.0984822	164	166	2	12419	IQGAP3,MICALL1
GO:MF	hydrolase activity	GO:0016787	0.797109	0.0984822	1430	166	18	12419	CPM,DMC1,IFT27,LOC100222446,LOC100225408,LTA4H,MCM5,METAP2,NAGA,OTOGL,PDE6H,PDXP,PLA2G6,RASD2,RECQL,SPAM1,TAB1,XPNPEP3
GO:BP	neuromuscular process controlling balance	GO:0050885	0.799457	0.0972048	39	166	1	12419	CLRN1
GO:BP	isoprenoid metabolic process	GO:0006720	0.799457	0.0972048	39	166	1	12419	PHYH
GO:BP	RNA-dependent DNA biosynthetic process	GO:0006278	0.799457	0.0972048	39	166	1	12419	CCT2
GO:BP	cardiac chamber development	GO:0003205	0.799457	0.0972048	104	166	2	12419	TAB1,WNT2
GO:BP	regulation of ERBB signaling pathway	GO:1901184	0.799457	0.0972048	39	166	1	12419	PDE6H
GO:BP	telomere maintenance via telomerase	GO:0007004	0.799457	0.0972048	39	166	1	12419	CCT2
GO:BP	fibroblast proliferation	GO:0048144	0.799457	0.0972048	39	166	1	12419	WNT2
GO:BP	endocytic recycling	GO:0032456	0.799457	0.0972048	39	166	1	12419	MICALL1
GO:BP	RNA export from nucleus	GO:0006405	0.799457	0.0972048	39	166	1	12419	LOC105759175
GO:BP	cilium assembly	GO:0060271	0.799457	0.0972048	173	166	3	12419	CBY1,TTC26,TTLL1
GO:BP	regulation of transferase activity	GO:0051338	0.799627	0.0971125	456	166	7	12419	CCT2,FBXO7,IQGAP3,NTF3,PDE6H,TAB1,WEE2
GO:CC	cell body	GO:0044297	0.801991	0.0958307	158	166	2	12419	BRAF,CCT2
GO:BP	regulation of fatty acid metabolic process	GO:0019217	0.802795	0.0953952	40	166	1	12419	APPL2
GO:BP	endoplasmic reticulum unfolded protein response	GO:0030968	0.802795	0.0953952	40	166	1	12419	CREB3L2
GO:BP	positive regulation of innate immune response	GO:0045089	0.802795	0.0953952	40	166	1	12419	POLR3B
GO:BP	negative regulation of response to DNA damage stimulus	GO:2001021	0.802795	0.0953952	40	166	1	12419	HELB
GO:BP	renal system process	GO:0003014	0.802795	0.0953952	40	166	1	12419	XPNPEP3
GO:BP	cell-cell signaling by wnt	GO:0198738	0.802795	0.0953952	244	166	4	12419	CBY1,CELSR1,LGR5,WNT2
GO:BP	lymphocyte differentiation	GO:0030098	0.802795	0.0953952	174	166	3	12419	BRAF,FBXO7,NFAM1
GO:BP	positive regulation of kinase activity	GO:0033674	0.802795	0.0953952	245	166	4	12419	IQGAP3,NTF3,PDE6H,TAB1
GO:BP	cellular senescence	GO:0090398	0.802795	0.0953952	40	166	1	12419	ZNF277
GO:BP	animal organ formation	GO:0048645	0.802795	0.0953952	40	166	1	12419	WNT2
GO:BP	humoral immune response	GO:0006959	0.802795	0.0953952	40	166	1	12419	PLA2G6
GO:BP	canonical Wnt signaling pathway	GO:0060070	0.802795	0.0953952	175	166	3	12419	CBY1,LGR5,WNT2
GO:BP	regulation of morphogenesis of an epithelium	GO:1905330	0.802795	0.0953952	40	166	1	12419	WNT2
GO:BP	positive regulation of DNA biosynthetic process	GO:2000573	0.802795	0.0953952	40	166	1	12419	CCT2
GO:BP	regulation of lymphocyte activation	GO:0051249	0.806544	0.0933719	176	166	3	12419	BRAF,FBXO7,NFAM1
GO:CC	cluster of actin-based cell projections	GO:0098862	0.806939	0.0931593	75	166	1	12419	CLRN1
GO:CC	condensed chromosome, centromeric region	GO:0000779	0.806939	0.0931593	75	166	1	12419	NUP37
GO:BP	positive regulation of protein-containing complex assembly	GO:0031334	0.807792	0.0927007	107	166	2	12419	LMOD2,WASL
GO:BP	regulation of secretion	GO:0051046	0.810227	0.0913934	248	166	4	12419	BRAF,CHRM2,PICK1,PLA2G6
GO:BP	cardiac muscle tissue development	GO:0048738	0.810227	0.0913934	108	166	2	12419	CBY1,WNT2
GO:BP	striated muscle cell proliferation	GO:0014855	0.810227	0.0913934	41	166	1	12419	WNT2
GO:BP	lipid storage	GO:0019915	0.810227	0.0913934	41	166	1	12419	SREBF2
GO:BP	CD4-positive, alpha-beta T cell activation	GO:0035710	0.810227	0.0913934	41	166	1	12419	BRAF
GO:BP	cellular biogenic amine metabolic process	GO:0006576	0.810227	0.0913934	41	166	1	12419	GPR37
GO:BP	platelet activation	GO:0030168	0.810227	0.0913934	41	166	1	12419	VWF
GO:BP	negative regulation of cell cycle	GO:0045786	0.810227	0.0913934	177	166	3	12419	FBXO7,THAP5,WEE2
GO:BP	regulation of cellular response to stress	GO:0080135	0.811381	0.0907753	320	166	5	12419	BRAF,FBXO7,GPR37,HELB,ZNF277
GO:BP	response to inorganic substance	GO:0010035	0.811381	0.0907753	178	166	3	12419	GPR37,KCNMB4,ZNF277
GO:CC	plasma membrane	GO:0005886	0.812081	0.0904005	2053	166	26	12419	APPL2,BRAF,CELSR1,CHRM2,CLRN1,GPR37,GPR85,GRAP2,IQGAP3,ITPR2,KCNMB4,LGR5,LOC100225408,METAP2,NCF4,PDXP,PICK1,RIC8B,SPAM1,SSTR3,STAB2,TMEM117,TWF1,VT1,WEE2,WNT2
GO:CC	intracellular protein-containing complex	GO:0140535	0.812081	0.0904005	413	166	5	12419	FBXO7,GPR37,POLR3B,POLR3H,YEATS4
GO:CC	intrinsic component of organelle membrane	GO:0031300	0.812081	0.0904005	163	166	2	12419	SLC37A3,SREBF2
GO:CC	plasma membrane region	GO:0098590	0.812081	0.0904005	494	166	6	12419	APPL2,CHRM2,PDXP,PICK1,SSTR3,TWF1
GO:BP	transforming growth factor beta receptor signaling pathway	GO:0007179	0.814934	0.0888773	109	166	2	12419	APPL2,TAB1
GO:BP	microtubule-based movement	GO:0007018	0.814934	0.0888773	179	166	3	12419	IFT27,TTC26,TTLL1
GO:BP	cellular response to extracellular stimulus	GO:0031668	0.814934	0.0888773	109	166	2	12419	C1AH12ORF66,SREBF2
GO:BP	peptide hormone secretion	GO:0030072	0.814934	0.0888773	109	166	2	12419	PICK1,PLA2G6
GO:BP	histone H4 acetylation	GO:0043967	0.815684	0.088478	42	166	1	12419	YEATS4
GO:BP	positive regulation of cold-induced thermogenesis	GO:0120162	0.815684	0.088478	42	166	1	12419	APPL2
GO:BP	dendritic spine development	GO:0060996	0.815684	0.088478	42	166	1	12419	WASL
GO:BP	ubiquitin-dependent ERAD pathway	GO:0030433	0.815684	0.088478	42	166	1	12419	FOXRED2
GO:BP	muscle adaptation	GO:0043500	0.815684	0.088478	42	166	1	12419	TWF1
GO:MF	GTP binding	GO:0005525	0.819327	0.0865426	257	166	3	12419	IFT27,RASD2,SEPTIN3
GO:MF	G protein-coupled receptor binding	GO:0001664	0.819327	0.0865426	82	166	1	12419	WNT2
GO:MF	phosphoric ester hydrolase activity	GO:0042578	0.819327	0.0865426	257	166	3	12419	PDE6H,PDXP,TAB1
GO:BP	ncRNA processing	GO:0034470	0.82301	0.084595	181	166	3	12419	DUS4L,PUS7,TPRKB
GO:BP	response to stress	GO:0006950	0.82301	0.084595	1567	166	22	12419	APPL2,BRAF,C1AH12ORF66,CELSR1,CREB3L2,DMC1,ELK3,FBXO7,FOXRED2,GPR37,HELB,ITPR2,MCM10,PLA2G6,POLR3B,PYROXD1,SREBF2,STAB2,TMEM117,TTLL12,VWF,ZNF277
GO:BP	protein-containing complex assembly	GO:0065003	0.82363	0.084268	688	166	10	12419	APPL2,C1AH12ORF73,CCT2,LMOD2,NDUFA12,NDUFB2,SAMM50,SNU13,TWF1,WASL
GO:BP	in utero embryonic development	GO:0001701	0.82363	0.084268	253	166	4	12419	MED21,TAB1,TTLL1,WNT2
GO:BP	peptide secretion	GO:0002790	0.82363	0.084268	111	166	2	12419	PICK1,PLA2G6
GO:BP	associative learning	GO:0008306	0.82363	0.084268	43	166	1	12419	BRAF
GO:BP	DNA modification	GO:0006304	0.82363	0.084268	43	166	1	12419	ASZ1
GO:BP	glutamine family amino acid metabolic process	GO:0009064	0.82363	0.084268	43	166	1	12419	HAL
GO:CC	motile cilium	GO:0031514	0.826838	0.0825794	82	166	1	12419	IFT27
GO:CC	neuron projection	GO:0043005	0.826838	0.0825794	421	166	5	12419	BRAF,CLRN1,FBXO7,PICK1,PVALB
GO:BP	glycerolipid biosynthetic process	GO:0045017	0.827939	0.0820019	112	166	2	12419	CHPT1,PLA2G6
GO:BP	regulation of protein secretion	GO:0050708	0.827939	0.0820019	112	166	2	12419	PICK1,PLA2G6
GO:BP	regulation of microtubule polymerization or depolymerization	GO:0031110	0.828384	0.0817684	44	166	1	12419	MAP6D1
GO:BP	cell-cell signaling	GO:0007267	0.828384	0.0817684	692	166	10	12419	BRAF,CBY1,CELSR1,CHRM2,LGR5,PICK1,PLA2G6,PMCH,RASD2,WNT2
GO:BP	muscle tissue morphogenesis	GO:0060415	0.828384	0.0817684	44	166	1	12419	WNT2
GO:BP	positive regulation of hormone secretion	GO:0046887	0.828384	0.0817684	44	166	1	12419	PLA2G6
GO:BP	regulation of type I interferon production	GO:0032479	0.828384	0.0817684	44	166	1	12419	POLR3B
GO:BP	type I interferon production	GO:0032606	0.828384	0.0817684	44	166	1	12419	POLR3B
GO:BP	negative regulation of protein phosphorylation	GO:0001933	0.828384	0.0817684	183	166	3	12419	FBXO7,NTF3,WEE2
GO:BP	cellular component assembly	GO:0022607	0.828384	0.0817684	1352	166	19	12419	APPL2,BRAF,C1AH12ORF73,CBY1,CCT2,CLRN1,LMOD2,NDUFA12,NDUFB2,PDXP,PPHLN1,SAMM50,SNU13,SYCE3,TTC26,TTLL1,TWF1,WASL,WEE2
GO:BP	cellular response to glucose stimulus	GO:0071333	0.828384	0.0817684	44	166	1	12419	PLA2G6
GO:BP	cartilage development	GO:0051216	0.828384	0.0817684	113	166	2	12419	CREB3L2,FGF6
GO:BP	cellular response to oxygen-containing compound	GO:1901701	0.829913	0.0809676	474	166	7	12419	APPL2,CHRM2,GPR37,ITPR2,PDXP,PLA2G6,ZNF277
GO:CC	extracellular region	GO:0005576	0.83073	0.0805399	748	166	9	12419	C1AH12ORF66,C1QTNF6,IAPP,NTF3,OTOGL,PLA2G6,TTLL1,VWF,WNT2
GO:CC	intrinsic component of plasma membrane	GO:0031226	0.832252	0.079745	512	166	6	12419	CHRM2,KCNMB4,LGR5,NCF4,STAB2,VT1
GO:CC	receptor complex	GO:0043235	0.832252	0.079745	177	166	2	12419	GPR37,ITPR2
GO:CC	cell periphery	GO:0071944	0.832252	0.079745	2236	166	28	12419	APPL2,BRAF,CELSR1,CHRM2,CLRN1,GPR37,GPR85,GRAP2,IQGAP3,ITPR2,KCNMB4,LGR5,LOC100225408,METAP2,NCF4,PDXP,PICK1,RIC8B,SPAM1,SSTR3,STAB2,TMEM117,TWF1,VT1,VWF,WASL,WEE2,WNT2
GO:CC	endocytic vesicle	GO:0030139	0.832252	0.079745	85	166	1	12419	APPL2
GO:BP	regulation of cell cycle	GO:0051726	0.832362	0.0796877	475	166	7	12419	APPL2,FBXO7,INTS13,PDXP,THAP5,TTLL12,WEE2
GO:BP	regulation of kinase activity	GO:0043549	0.832362	0.0796877	402	166	6	12419	FBXO7,IQGAP3,NTF3,PDE6H,TAB1,WEE2
GO:BP	telomere maintenance via telomere lengthening	GO:0010833	0.833834	0.0789205	45	166	1	12419	CCT2
GO:BP	regulation of organ growth	GO:0046620	0.833834	0.0789205	45	166	1	12419	WNT2
GO:BP	regulation of double-strand break repair	GO:2000779	0.833834	0.0789205	45	166	1	12419	HELB
GO:BP	negative regulation of leukocyte differentiation	GO:1902106	0.833834	0.0789205	45	166	1	12419	FBXO7
GO:BP	cellular response to unfolded protein	GO:0034620	0.833834	0.0789205	45	166	1	12419	CREB3L2
GO:BP	nucleoside monophosphate metabolic process	GO:0009123	0.833834	0.0789205	45	166	1	12419	ADSL
GO:BP	fatty acid catabolic process	GO:0009062	0.833834	0.0789205	45	166	1	12419	PHYH
GO:BP	biological process involved in interspecies interaction between organisms	GO:0044419	0.834056	0.0788047	477	166	7	12419	APPL2,PLA2G6,POLR3B,ST13,STAB2,TTLL12,WASL
GO:BP	cellular response to chemical stimulus	GO:0070887	0.834194	0.0787327	1361	166	19	12419	APPL2,BRAF,CHRM2,CREB3L2,FBXO7,FGF6,GPR37,IQGAP3,ITPR2,NFYB,PDXP,PLA2G6,PYROXD1,SSTR3,TAB1,TRIM24,TTLL12,WNT2,ZNF277
GO:BP	glucose homeostasis	GO:0042593	0.834194	0.0787327	115	166	2	12419	APPL2,PLA2G6
GO:BP	carbohydrate homeostasis	GO:0033500	0.834194	0.0787327	115	166	2	12419	APPL2,PLA2G6
GO:BP	transition metal ion transport	GO:0000041	0.834597	0.0785232	46	166	1	12419	REP15
GO:BP	cellular response to monosaccharide stimulus	GO:0071326	0.834597	0.0785232	46	166	1	12419	PLA2G6
GO:BP	regulation of reactive oxygen species metabolic process	GO:2000377	0.834597	0.0785232	46	166	1	12419	TSPO
GO:BP	receptor-mediated endocytosis	GO:0006898	0.834597	0.0785232	116	166	2	12419	MICALL1,NTF3
GO:BP	monocarboxylic acid metabolic process	GO:0032787	0.834597	0.0785232	260	166	4	12419	APPL2,HAL,PHYH,TBXAS1
GO:BP	cellular amine metabolic process	GO:0044106	0.834597	0.0785232	46	166	1	12419	GPR37
GO:BP	cellular response to hexose stimulus	GO:0071331	0.834597	0.0785232	46	166	1	12419	PLA2G6
GO:BP	positive regulation of plasma membrane bounded cell projection assembly	GO:0120034	0.834597	0.0785232	46	166	1	12419	CLRN1
GO:BP	organonitrogen compound catabolic process	GO:1901565	0.834597	0.0785232	627	166	9	12419	FBXO7,FOXRED2,GCAT,HAL,LTA4H,PAH,PDXP,PLA2G6,TRIM24
GO:BP	negative regulation of hemopoiesis	GO:1903707	0.834597	0.0785232	46	166	1	12419	FBXO7
GO:BP	glycoprotein biosynthetic process	GO:0009101	0.834597	0.0785232	187	166	3	12419	GXYLT1,PHLDA1,RXYLT1
GO:BP	peptidyl-tyrosine phosphorylation	GO:0018108	0.834597	0.0785232	187	166	3	12419	NTF3,TWF1,WEE2
GO:BP	obsolete oxidation-reduction process	GO:0055114	0.835218	0.0782004	334	166	5	12419	DUS4L,LOC100222415,PAH,PYROXD1,TBXAS1
GO:MF	potassium channel activity	GO:0005267	0.835325	0.0781446	86	166	1	12419	KCNMB4
GO:BP	positive regulation of signal transduction	GO:0009967	0.836687	0.0774369	714	166	10	12419	APPL2,BRAF,GPR37,IQGAP3,LGR5,NFAM1,NTF3,PDE6H,TAB1,VWF
GO:BP	plasma membrane bounded cell projection assembly	GO:0120031	0.836687	0.0774369	262	166	4	12419	CBY1,CLRN1,TTC26,TTLL1
GO:BP	myoblast differentiation	GO:0045445	0.836687	0.0774369	49	166	1	12419	FGF6
GO:BP	cardiac muscle cell differentiation	GO:0055007	0.836687	0.0774369	50	166	1	12419	CBY1
GO:BP	negative regulation of lipid metabolic process	GO:0045833	0.836687	0.0774369	49	166	1	12419	APPL2
GO:BP	positive regulation of protein transport	GO:0051222	0.836687	0.0774369	120	166	2	12419	MIEF1,PLA2G6
GO:BP	positive regulation of transcription by RNA polymerase II	GO:0045944	0.836687	0.0774369	639	166	9	12419	CREB3L2,ELK3,MED21,NFYB,PRDM4,SREBF2,TEF,WASL,WNT2
GO:BP	trans-synaptic signaling	GO:0099537	0.836687	0.0774369	275	166	4	12419	BRAF,CHRM2,PMCH,RASD2
GO:BP	monocarboxylic acid catabolic process	GO:0072329	0.836687	0.0774369	51	166	1	12419	PHYH
GO:BP	response to calcium ion	GO:0051592	0.836687	0.0774369	52	166	1	12419	KCNMB4
GO:BP	sterol homeostasis	GO:0055092	0.836687	0.0774369	48	166	1	12419	SREBF2
GO:BP	negative regulation of protein ubiquitination	GO:0031397	0.836687	0.0774369	50	166	1	12419	TSPO
GO:BP	positive regulation of signaling	GO:0023056	0.836687	0.0774369	793	166	11	12419	APPL2,BRAF,GPR37,IQGAP3,LGR5,NFAM1,NTF3,PDE6H,PLA2G6,TAB1,VWF
GO:BP	regulation of stress fiber assembly	GO:0051492	0.836687	0.0774369	50	166	1	12419	BRAF
GO:BP	peptidyl-tyrosine modification	GO:0018212	0.836687	0.0774369	190	166	3	12419	NTF3,TWF1,WEE2
GO:BP	positive regulation of lipid localization	GO:1905954	0.836687	0.0774369	48	166	1	12419	SREBF2
GO:BP	mitotic cell cycle phase transition	GO:0044772	0.836687	0.0774369	200	166	3	12419	APPL2,FBXO7,IQGAP3
GO:BP	positive regulation of protein localization to membrane	GO:1905477	0.836687	0.0774369	47	166	1	12419	MIEF1
GO:BP	response to unfolded protein	GO:0006986	0.836687	0.0774369	52	166	1	12419	CREB3L2
GO:BP	cellular response to carbohydrate stimulus	GO:0071322	0.836687	0.0774369	50	166	1	12419	PLA2G6
GO:BP	phospholipid biosynthetic process	GO:0008654	0.836687	0.0774369	118	166	2	12419	CHPT1,PLA2G6
GO:BP	protein localization to membrane	GO:0072657	0.836687	0.0774369	262	166	4	12419	MICALL1,MIEF1,SAMM50,TOMM22
GO:BP	cell projection assembly	GO:0030031	0.836687	0.0774369	265	166	4	12419	CBY1,CLRN1,TTC26,TTLL1
GO:BP	regulation of response to stress	GO:0080134	0.836687	0.0774369	570	166	8	12419	APPL2,BRAF,FBXO7,GPR37,HELB,POLR3B,TTLL12,ZNF277
GO:BP	hexose transmembrane transport	GO:0008645	0.836687	0.0774369	51	166	1	12419	APPL2
GO:BP	protein tetramerization	GO:0051262	0.836687	0.0774369	49	166	1	12419	APPL2
GO:BP	amine metabolic process	GO:0009308	0.836687	0.0774369	47	166	1	12419	GPR37
GO:BP	negative regulation of transport	GO:0051051	0.836687	0.0774369	192	166	3	12419	APPL2,BRAF,SREBF2
GO:BP	anterograde trans-synaptic signaling	GO:0098916	0.836687	0.0774369	270	166	4	12419	BRAF,CHRM2,PMCH,RASD2
GO:BP	positive regulation of protein secretion	GO:0050714	0.836687	0.0774369	52	166	1	12419	PLA2G6
GO:BP	morphogenesis of a branching epithelium	GO:0061138	0.836687	0.0774369	120	166	2	12419	CELSR1,WNT2
GO:BP	regulation of mononuclear cell migration	GO:0071675	0.836687	0.0774369	49	166	1	12419	WASL
GO:BP	regulation of receptor-mediated endocytosis	GO:0048259	0.836687	0.0774369	47	166	1	12419	NTF3
GO:BP	cerebellum development	GO:0021549	0.836687	0.0774369	52	166	1	12419	TTLL1
GO:BP	negative regulation of protein kinase activity	GO:0006469	0.836687	0.0774369	120	166	2	12419	FBXO7,WEE2
GO:BP	renal tubule morphogenesis	GO:0061333	0.836687	0.0774369	50	166	1	12419	LGR5
GO:BP	sperm motility	GO:0097722	0.836687	0.0774369	49	166	1	12419	TTLL1
GO:BP	lamellipodium organization	GO:0097581	0.836687	0.0774369	49	166	1	12419	CLRN1
GO:BP	fibroblast growth factor receptor signaling pathway	GO:0008543	0.836687	0.0774369	51	166	1	12419	FGF6
GO:BP	phenol-containing compound metabolic process	GO:0018958	0.836687	0.0774369	52	166	1	12419	GPR37
GO:BP	epithelial tube morphogenesis	GO:0060562	0.836687	0.0774369	198	166	3	12419	CELSR1,LGR5,WNT2
GO:BP	second-messenger-mediated signaling	GO:0019932	0.836687	0.0774369	119	166	2	12419	ITPR2,VT1
GO:BP	flagellated sperm motility	GO:0030317	0.836687	0.0774369	49	166	1	12419	TTLL1
GO:BP	tube closure	GO:0060606	0.836687	0.0774369	51	166	1	12419	CELSR1
GO:BP	cellular component assembly involved in morphogenesis	GO:0010927	0.836687	0.0774369	50	166	1	12419	LMOD2
GO:BP	negative regulation of neurogenesis	GO:0050768	0.836687	0.0774369	52	166	1	12419	APPL2
GO:BP	positive regulation of neuron projection development	GO:0010976	0.836687	0.0774369	50	166	1	12419	BRAF
GO:BP	chemical synaptic transmission	GO:0007268	0.836687	0.0774369	270	166	4	12419	BRAF,CHRM2,PMCH,RASD2
GO:BP	negative regulation of cellular component organization	GO:0051129	0.836687	0.0774369	347	166	5	12419	LMOD2,MAP6D1,TSPO,TWF1,WASL
GO:BP	muscle organ morphogenesis	GO:0048644	0.836687	0.0774369	48	166	1	12419	WNT2
GO:BP	mRNA transport	GO:0051028	0.836687	0.0774369	49	166	1	12419	LOC105759175
GO:BP	regeneration	GO:0031099	0.836687	0.0774369	52	166	1	12419	BRAF
GO:BP	regulation of G protein-coupled receptor signaling pathway	GO:0008277	0.836687	0.0774369	52	166	1	12419	PDE6H
GO:BP	glucose transmembrane transport	GO:1904659	0.836687	0.0774369	50	166	1	12419	APPL2
GO:BP	central nervous system neuron differentiation	GO:0021953	0.836687	0.0774369	125	166	2	12419	TTLL1,WNT2
GO:BP	nucleic acid metabolic process	GO:0090304	0.836687	0.0774369	2480	166	34	12419	ASCL4,ASZ1,CCT2,CREB3L2,DBX2,DMC1,DUS4L,ELK3,HELB,HMGA2,LOC100221944,MCM10,MCM5,MED21,MTERF2,NFYB,POLR3B,POLR3H,PPHLN1,PRDM4,PUS7,RECQL,SNU13,SREBF2,SYCE3,TEF,THAP5,TPRKB,TRIM24,WASL,WNT2,YARS2,YEATS4,ZCRB1
GO:BP	anterior/posterior pattern specification	GO:0009952	0.836687	0.0774369	123	166	2	12419	CELSR1,WNT2
GO:BP	alpha-beta T cell differentiation	GO:0046632	0.836687	0.0774369	52	166	1	12419	BRAF
GO:BP	regulation of pattern recognition receptor signaling pathway	GO:0062207	0.836687	0.0774369	49	166	1	12419	APPL2
GO:BP	negative regulation of small molecule metabolic process	GO:0062014	0.836687	0.0774369	49	166	1	12419	APPL2
GO:BP	organic substance transport	GO:0071702	0.836687	0.0774369	1086	166	15	12419	APPL2,FBXO7,IFT27,KDELR3,LOC105758589,LOC105759175,MICALL1,MIEF1,PICK1,PLA2G6,REP15,SAMM50,SREBF2,TOM1,TOMM22
GO:BP	positive regulation of synaptic transmission	GO:0050806	0.836687	0.0774369	50	166	1	12419	BRAF
GO:BP	striated muscle cell differentiation	GO:0051146	0.836687	0.0774369	120	166	2	12419	CBY1,LMOD2
GO:BP	mitochondrial transmembrane transport	GO:1990542	0.836687	0.0774369	47	166	1	12419	LOC105758589
GO:BP	cell recognition	GO:0008037	0.836687	0.0774369	47	166	1	12419	CCT2
GO:BP	positive regulation of metabolic process	GO:0009893	0.836687	0.0774369	1835	166	25	12419	APAF1,APPL2,BRAF,CCT2,CREB3L2,ELK3,FBXO7,GPR37,IQGAP3,MED21,NFAM1,NFYB,NTF3,PDE6H,POLR3B,PPHLN1,PRDM4,SREBF2,TAB1,TEF,TRIM24,TSPO,WASL,WEE2,WNT2
GO:BP	mononuclear cell differentiation	GO:1903131	0.836687	0.0774369	193	166	3	12419	BRAF,FBXO7,NFAM1
GO:BP	regulation of autophagy	GO:0010506	0.836687	0.0774369	126	166	2	12419	FBXO7,TSPO
GO:BP	chromatin assembly	GO:0031497	0.836687	0.0774369	48	166	1	12419	PPHLN1
GO:BP	regulation of cell morphogenesis involved in differentiation	GO:0010769	0.836687	0.0774369	47	166	1	12419	BRAF
GO:BP	skin development	GO:0043588	0.836687	0.0774369	126	166	2	12419	CELSR1,LGR5
GO:BP	liposaccharide metabolic process	GO:1903509	0.836687	0.0774369	52	166	1	12419	NAGA
GO:BP	neural tube closure	GO:0001843	0.836687	0.0774369	51	166	1	12419	CELSR1
GO:BP	cellular component organization	GO:0016043	0.836687	0.0774369	3023	166	41	12419	APPL2,ASZ1,BRAF,C1AH12ORF73,CBY1,CCT2,CELSR1,CLRN1,DMC1,FBXO7,HELB,IFT27,INTS13,IQGAP3,LMOD2,LOC100225408,MAP6D1,MCM5,MICALL1,MIEF1,NDUFA12,NDUFB2,NTF3,PARVG,PDXP,PHETA2,PPHLN1,RECQL,SAMM50,SNU13,SPAM1,STK38L,SYCE3,TOMM22,TSPO,TTC26,TTLL1,TWF1,WASL,WEE2,YEATS4
GO:BP	regulation of telomere maintenance	GO:0032204	0.836687	0.0774369	47	166	1	12419	CCT2
GO:BP	embryo development ending in birth or egg hatching	GO:0009792	0.836687	0.0774369	417	166	6	12419	CBY1,CELSR1,MED21,TAB1,TTLL1,WNT2
GO:BP	morphogenesis of a polarized epithelium	GO:0001738	0.836687	0.0774369	48	166	1	12419	CELSR1
GO:BP	regulation of gene expression, epigenetic	GO:0040029	0.836687	0.0774369	51	166	1	12419	PPHLN1
GO:BP	retrograde transport, endosome to Golgi	GO:0042147	0.836687	0.0774369	49	166	1	12419	PHETA2
GO:BP	positive regulation of cysteine-type endopeptidase activity involved in apoptotic process	GO:0043280	0.836687	0.0774369	48	166	1	12419	APAF1
GO:BP	regulation of protein-containing complex assembly	GO:0043254	0.836687	0.0774369	195	166	3	12419	LMOD2,TWF1,WASL
GO:BP	response to nitrogen compound	GO:1901698	0.836687	0.0774369	414	166	6	12419	APPL2,CHRM2,FOXRED2,ITPR2,PDXP,SREBF2
GO:BP	regulation of neuron death	GO:1901214	0.836687	0.0774369	126	166	2	12419	BRAF,FBXO7
GO:BP	glycolipid metabolic process	GO:0006664	0.836687	0.0774369	51	166	1	12419	NAGA
GO:BP	cholesterol homeostasis	GO:0042632	0.836687	0.0774369	48	166	1	12419	SREBF2
GO:BP	positive regulation of cell communication	GO:0010647	0.836687	0.0774369	787	166	11	12419	APPL2,BRAF,GPR37,IQGAP3,LGR5,NFAM1,NTF3,PDE6H,PLA2G6,TAB1,VWF
GO:BP	regulation of DNA recombination	GO:0000018	0.836687	0.0774369	49	166	1	12419	HELB
GO:BP	cellular response to stress	GO:0033554	0.836687	0.0774369	947	166	13	12419	BRAF,C1AH12ORF66,CREB3L2,DMC1,FBXO7,FOXRED2,GPR37,HELB,MCM10,PYROXD1,SREBF2,TMEM117,ZNF277
GO:BP	chordate embryonic development	GO:0043009	0.836687	0.0774369	411	166	6	12419	CBY1,CELSR1,MED21,TAB1,TTLL1,WNT2
GO:BP	mitochondrial gene expression	GO:0140053	0.836687	0.0774369	52	166	1	12419	YARS2
GO:BP	regulation of cytokinesis	GO:0032465	0.836687	0.0774369	48	166	1	12419	PDXP
GO:BP	monosaccharide transmembrane transport	GO:0015749	0.836687	0.0774369	52	166	1	12419	APPL2
GO:BP	peptide transport	GO:0015833	0.836687	0.0774369	125	166	2	12419	PICK1,PLA2G6
GO:BP	positive regulation of peptidyl-serine phosphorylation	GO:0033138	0.836687	0.0774369	50	166	1	12419	NTF3
GO:CC	RNA polymerase II transcription regulator complex	GO:0090575	0.837243	0.0771483	88	166	1	12419	NFYB
GO:BP	regulation of nervous system development	GO:0051960	0.837688	0.0769175	201	166	3	12419	APPL2,BRAF,WNT2
GO:BP	cellular aromatic compound metabolic process	GO:0006725	0.837688	0.0769175	2818	166	38	12419	ADSL,ASCL4,ASZ1,CCT2,CREB3L2,DBX2,DMC1,DUS4L,ELK3,GPR37,HELB,HMGA2,LOC100221944,MCM10,MCM5,MED21,MTERF2,NFYB,PAH,PDXP,POLR3B,POLR3H,PPHLN1,PRDM4,PUS7,RECQL,SNU13,SREBF2,SYCE3,TEF,THAP5,TPRKB,TRIM24,WASL,WNT2,YARS2,YEATS4,ZCRB1
GO:MF	phosphotransferase activity, alcohol group as acceptor	GO:0016773	0.837874	0.0768213	515	166	6	12419	ADCK2,BRAF,LOC100222446,STK38L,TWF1,WEE2
GO:CC	cullin-RING ubiquitin ligase complex	GO:0031461	0.838688	0.0763994	89	166	1	12419	FBXO7
GO:CC	external side of plasma membrane	GO:0009897	0.840056	0.0756919	90	166	1	12419	WNT2
GO:MF	cytokine receptor binding	GO:0005126	0.840122	0.0756578	88	166	1	12419	NTF3
GO:MF	transmembrane receptor protein kinase activity	GO:0019199	0.840122	0.0756578	89	166	1	12419	WEE2
GO:MF	carbohydrate binding	GO:0030246	0.840122	0.0756578	89	166	1	12419	PHYH
GO:MF	protein kinase activity	GO:0004672	0.841986	0.0746951	440	166	5	12419	ADCK2,BRAF,STK38L,TWF1,WEE2
GO:MF	glycosaminoglycan binding	GO:0005539	0.841986	0.0746951	90	166	1	12419	STAB2
GO:BP	cholesterol transport	GO:0030301	0.842125	0.0746235	53	166	1	12419	SREBF2
GO:BP	cellular response to topologically incorrect protein	GO:0035967	0.842125	0.0746235	53	166	1	12419	CREB3L2
GO:BP	carbohydrate transmembrane transport	GO:0034219	0.842125	0.0746235	53	166	1	12419	APPL2
GO:BP	epithelial cell apoptotic process	GO:1904019	0.842125	0.0746235	53	166	1	12419	BRAF
GO:BP	negative regulation of transmembrane transport	GO:0034763	0.842125	0.0746235	53	166	1	12419	APPL2
GO:BP	morphogenesis of a branching structure	GO:0001763	0.844829	0.0732312	128	166	2	12419	CELSR1,WNT2
GO:BP	positive regulation of cell projection organization	GO:0031346	0.846152	0.0725514	129	166	2	12419	BRAF,CLRN1
GO:BP	negative regulation of nervous system development	GO:0051961	0.846152	0.0725514	54	166	1	12419	APPL2
GO:BP	positive regulation of response to biotic stimulus	GO:0002833	0.846152	0.0725514	54	166	1	12419	POLR3B
GO:BP	regulation of mitotic nuclear division	GO:0007088	0.846152	0.0725514	54	166	1	12419	PDXP
GO:BP	mitotic cell cycle process	GO:1903047	0.846152	0.0725514	354	166	5	12419	APPL2,FBXO7,INTS13,IQGAP3,PDXP
GO:BP	regulation of actomyosin structure organization	GO:0110020	0.846152	0.0725514	54	166	1	12419	BRAF
GO:BP	cellular response to nitrogen compound	GO:1901699	0.846152	0.0725514	280	166	4	12419	APPL2,CHRM2,ITPR2,PDXP
GO:BP	negative regulation of protein modification by small protein conjugation or removal	GO:1903321	0.846152	0.0725514	54	166	1	12419	TSPO
GO:BP	substrate adhesion-dependent cell spreading	GO:0034446	0.846152	0.0725514	54	166	1	12419	BRAF
GO:MF	transferase activity	GO:0016740	0.849472	0.070851	1491	166	18	12419	ADCK2,BRAF,CHPT1,CMAS,GCAT,GXYLT1,LOC100222446,LOC100228825,LOC105758589,POLR3B,POLR3H,PRDM4,RXYLT1,STK38L,SULT4A1,TRIM24,TWF1,WEE2
GO:BP	synaptic signaling	GO:0099536	0.850033	0.070564	281	166	4	12419	BRAF,CHRM2,PMCH,RASD2
GO:MF	tubulin binding	GO:0015631	0.850188	0.0704853	188	166	2	12419	MAP6D1,TTLL12
GO:MF	potassium ion transmembrane transporter activity	GO:0015079	0.850188	0.0704853	95	166	1	12419	KCNMB4
GO:MF	signaling receptor binding	GO:0005102	0.850188	0.0704853	615	166	7	12419	FGF6,IAPP,NTF3,PMCH,SSTR3,VWF,WNT2
GO:MF	kinase regulator activity	GO:0019207	0.850188	0.0704853	94	166	1	12419	TAB1
GO:MF	glycosyltransferase activity	GO:0016757	0.850363	0.0703955	190	166	2	12419	GXYLT1,RXYLT1
GO:BP	positive regulation of nervous system development	GO:0051962	0.852242	0.069437	131	166	2	12419	BRAF,WNT2
GO:BP	negative regulation of kinase activity	GO:0033673	0.852242	0.069437	131	166	2	12419	FBXO7,WEE2
GO:BP	ERK1 and ERK2 cascade	GO:0070371	0.852242	0.069437	131	166	2	12419	BRAF,IQGAP3
GO:BP	regulation of actin filament bundle assembly	GO:0032231	0.852242	0.069437	55	166	1	12419	BRAF
GO:BP	regulation of neural precursor cell proliferation	GO:2000177	0.852242	0.069437	55	166	1	12419	APPL2
GO:BP	negative regulation of cell migration	GO:0030336	0.852242	0.069437	131	166	2	12419	BRAF,WASL
GO:BP	sterol transport	GO:0015918	0.852242	0.069437	55	166	1	12419	SREBF2
GO:BP	negative regulation of phosphorylation	GO:0042326	0.852242	0.069437	206	166	3	12419	FBXO7,NTF3,WEE2
GO:CC	centrosome	GO:0005813	0.853326	0.0688851	362	166	4	12419	IFT27,PLA2G6,POLR3H,TTC26
GO:MF	phosphatase activity	GO:0016791	0.854086	0.0684985	192	166	2	12419	PDXP,TAB1
GO:BP	T cell receptor signaling pathway	GO:0050852	0.855249	0.0679074	56	166	1	12419	BRAF
GO:BP	regulation of axonogenesis	GO:0050770	0.855249	0.0679074	56	166	1	12419	BRAF
GO:BP	cell surface receptor signaling pathway involved in cell-cell signaling	GO:1905114	0.855249	0.0679074	284	166	4	12419	CBY1,CELSR1,LGR5,WNT2
GO:BP	primary neural tube formation	GO:0014020	0.855249	0.0679074	56	166	1	12419	CELSR1
GO:BP	Rho protein signal transduction	GO:0007266	0.855249	0.0679074	56	166	1	12419	CELSR1
GO:BP	positive regulation of chromatin organization	GO:1905269	0.855249	0.0679074	56	166	1	12419	PPHLN1
GO:BP	embryonic placenta development	GO:0001892	0.855249	0.0679074	56	166	1	12419	WNT2
GO:BP	regulation of leukocyte activation	GO:0002694	0.857407	0.0668131	209	166	3	12419	BRAF,FBXO7,NFAM1
GO:MF	ligand-gated channel activity	GO:0022834	0.858741	0.0661376	100	166	1	12419	ITPR2
GO:MF	serine hydrolase activity	GO:0017171	0.858741	0.0661376	99	166	1	12419	PLA2G6
GO:MF	ligand-gated ion channel activity	GO:0015276	0.858741	0.0661376	100	166	1	12419	ITPR2
GO:BP	cellular response to external stimulus	GO:0071496	0.85901	0.0660019	133	166	2	12419	C1AH12ORF66,SREBF2
GO:MF	GTPase activity	GO:0003924	0.859057	0.0659781	197	166	2	12419	IFT27,RASD2
GO:BP	cilium movement involved in cell motility	GO:0060294	0.859697	0.0656547	57	166	1	12419	TTLL1
GO:BP	cell aging	GO:0007569	0.859697	0.0656547	57	166	1	12419	ZNF277
GO:BP	epidermal growth factor receptor signaling pathway	GO:0007173	0.859697	0.0656547	57	166	1	12419	PDE6H
GO:BP	positive regulation of cysteine-type endopeptidase activity	GO:2001056	0.859697	0.0656547	57	166	1	12419	APAF1
GO:BP	metencephalon development	GO:0022037	0.859697	0.0656547	57	166	1	12419	TTLL1
GO:BP	generation of neurons	GO:0048699	0.859697	0.0656547	741	166	10	12419	APPL2,BRAF,CELSR1,CLRN1,FBXO7,IFT27,MICALL1,TTLL1,WASL,WNT2
GO:MF	calcium ion binding	GO:0005509	0.862326	0.0643283	378	166	4	12419	CELSR1,LOC100225408,PVALB,STAB2
GO:MF	zinc ion binding	GO:0008270	0.863257	0.06386	466	166	5	12419	CPM,LOC101234089,LTA4H,TRIM24,ZCRB1
GO:BP	negative regulation of protein modification process	GO:0031400	0.864338	0.0633164	288	166	4	12419	FBXO7,NTF3,TSPO,WEE2
GO:MF	protein-macromolecule adaptor activity	GO:0030674	0.864424	0.0632731	104	166	1	12419	FBXO7
GO:BP	action potential	GO:0001508	0.865375	0.0627956	58	166	1	12419	KCNMB4
GO:BP	toll-like receptor signaling pathway	GO:0002224	0.865375	0.0627956	58	166	1	12419	APPL2
GO:BP	negative regulation of DNA metabolic process	GO:0051053	0.865375	0.0627956	58	166	1	12419	HELB
GO:BP	regulation of cytokine-mediated signaling pathway	GO:0001959	0.865375	0.0627956	58	166	1	12419	TTLL12
GO:BP	membrane fusion	GO:0061025	0.865375	0.0627956	58	166	1	12419	SPAM1
GO:BP	cilium or flagellum-dependent cell motility	GO:0001539	0.865535	0.0627154	59	166	1	12419	TTLL1
GO:BP	response to alcohol	GO:0097305	0.865535	0.0627154	59	166	1	12419	ITPR2
GO:BP	regulation of DNA biosynthetic process	GO:2000278	0.865535	0.0627154	59	166	1	12419	CCT2
GO:BP	B cell differentiation	GO:0030183	0.865535	0.0627154	60	166	1	12419	NFAM1
GO:BP	epithelial cell proliferation	GO:0050673	0.865535	0.0627154	218	166	3	12419	IQGAP3,LGR5,WNT2
GO:BP	gland development	GO:0048732	0.865535	0.0627154	216	166	3	12419	BRAF,IQGAP3,WNT2
GO:BP	homophilic cell adhesion via plasma membrane adhesion molecules	GO:0007156	0.865535	0.0627154	59	166	1	12419	CELSR1
GO:BP	muscle structure development	GO:0061061	0.865535	0.0627154	296	166	4	12419	CBY1,FGF6,LMOD2,WNT2
GO:BP	response to chemical	GO:0042221	0.865535	0.0627154	1742	166	23	12419	APPL2,BRAF,CHRM2,CREB3L2,FBXO7,FGF6,FOXRED2,GPR37,IQGAP3,ITPR2,KCNMB4,NFYB,NTF3,PDXP,PLA2G6,PYROXD1,SREBF2,SSTR3,TAB1,TRIM24,TTLL12,WNT2,ZNF277
GO:BP	artery development	GO:0060840	0.865535	0.0627154	61	166	1	12419	TAB1
GO:BP	mitotic spindle organization	GO:0007052	0.865535	0.0627154	61	166	1	12419	INTS13
GO:BP	protein lipidation	GO:0006497	0.865535	0.0627154	59	166	1	12419	MAP6D1
GO:BP	regulation of lipid transport	GO:0032368	0.865535	0.0627154	60	166	1	12419	SREBF2
GO:BP	chondrocyte differentiation	GO:0002062	0.865535	0.0627154	61	166	1	12419	CREB3L2
GO:BP	cilium-dependent cell motility	GO:0060285	0.865535	0.0627154	59	166	1	12419	TTLL1
GO:BP	response to fibroblast growth factor	GO:0071774	0.865535	0.0627154	61	166	1	12419	FGF6
GO:BP	protein maturation	GO:0051604	0.865535	0.0627154	137	166	2	12419	METAP2,XPNPEP3
GO:BP	response to topologically incorrect protein	GO:0035966	0.865535	0.0627154	61	166	1	12419	CREB3L2
GO:BP	regulation of immune system process	GO:0002682	0.865535	0.0627154	524	166	7	12419	APPL2,BRAF,FBXO7,NFAM1,POLR3B,TTLL12,WASL
GO:BP	nucleus organization	GO:0006997	0.865535	0.0627154	59	166	1	12419	WEE2
GO:BP	ERAD pathway	GO:0036503	0.865535	0.0627154	61	166	1	12419	FOXRED2
GO:BP	negative regulation of cell motility	GO:2000146	0.865535	0.0627154	138	166	2	12419	BRAF,WASL
GO:BP	contractile actin filament bundle assembly	GO:0030038	0.865535	0.0627154	60	166	1	12419	BRAF
GO:BP	carbohydrate catabolic process	GO:0016052	0.865535	0.0627154	61	166	1	12419	NAGA
GO:BP	cellular glucose homeostasis	GO:0001678	0.865535	0.0627154	59	166	1	12419	PLA2G6
GO:BP	regulation of mitotic cell cycle phase transition	GO:1901990	0.865535	0.0627154	138	166	2	12419	APPL2,FBXO7
GO:BP	chromatin assembly or disassembly	GO:0006333	0.865535	0.0627154	61	166	1	12419	PPHLN1
GO:BP	positive regulation of canonical Wnt signaling pathway	GO:0090263	0.865535	0.0627154	61	166	1	12419	LGR5
GO:BP	positive regulation of chemotaxis	GO:0050921	0.865535	0.0627154	60	166	1	12419	NTF3
GO:BP	regulation of B cell activation	GO:0050864	0.865535	0.0627154	59	166	1	12419	NFAM1
GO:BP	lipoprotein biosynthetic process	GO:0042158	0.865535	0.0627154	61	166	1	12419	MAP6D1
GO:BP	response to endogenous stimulus	GO:0009719	0.865535	0.0627154	678	166	9	12419	APPL2,FGF6,ITPR2,PDXP,SREBF2,SSTR3,TAB1,TRIM24,WNT2
GO:BP	negative regulation of lymphocyte activation	GO:0051250	0.865535	0.0627154	61	166	1	12419	FBXO7
GO:BP	cellular response to fibroblast growth factor stimulus	GO:0044344	0.865535	0.0627154	61	166	1	12419	FGF6
GO:BP	hormone secretion	GO:0046879	0.865535	0.0627154	138	166	2	12419	PICK1,PLA2G6
GO:BP	protein acylation	GO:0043543	0.865535	0.0627154	137	166	2	12419	MAP6D1,YEATS4
GO:BP	carboxylic acid biosynthetic process	GO:0046394	0.865535	0.0627154	140	166	2	12419	LTA4H,TBXAS1
GO:BP	stress fiber assembly	GO:0043149	0.865535	0.0627154	60	166	1	12419	BRAF
GO:BP	microtubule polymerization or depolymerization	GO:0031109	0.865535	0.0627154	60	166	1	12419	MAP6D1
GO:BP	sensory perception	GO:0007600	0.865535	0.0627154	217	166	3	12419	CLRN1,OTOGL,PDE6H
GO:BP	regulation of defense response	GO:0031347	0.865535	0.0627154	215	166	3	12419	APPL2,POLR3B,TTLL12
GO:BP	positive regulation of cell development	GO:0010720	0.865535	0.0627154	137	166	2	12419	BRAF,WNT2
GO:BP	lipid homeostasis	GO:0055088	0.867354	0.0618037	62	166	1	12419	SREBF2
GO:BP	dendrite morphogenesis	GO:0048813	0.867354	0.0618037	62	166	1	12419	WASL
GO:BP	neuron projection development	GO:0031175	0.867354	0.0618037	452	166	6	12419	BRAF,CLRN1,FBXO7,IFT27,MICALL1,WASL
GO:BP	protein glycosylation	GO:0006486	0.867354	0.0618037	141	166	2	12419	GXYLT1,RXYLT1
GO:BP	glycoprotein metabolic process	GO:0009100	0.867354	0.0618037	220	166	3	12419	GXYLT1,PHLDA1,RXYLT1
GO:BP	regulation of canonical Wnt signaling pathway	GO:0060828	0.867354	0.0618037	141	166	2	12419	CBY1,LGR5
GO:BP	neural tube formation	GO:0001841	0.867354	0.0618037	62	166	1	12419	CELSR1
GO:BP	amide transport	GO:0042886	0.867354	0.0618037	141	166	2	12419	PICK1,PLA2G6
GO:BP	macromolecule glycosylation	GO:0043413	0.867354	0.0618037	141	166	2	12419	GXYLT1,RXYLT1
GO:CC	Golgi apparatus	GO:0005794	0.867488	0.0617366	707	166	8	12419	COG5,KDELR3,LGR5,LOC100229115,MAP6D1,PHETA2,PPHLN1,RXYLT1
GO:CC	secretory granule	GO:0030141	0.867488	0.0617366	98	166	1	12419	VWF
GO:BP	DNA packaging	GO:0006323	0.868929	0.0610159	63	166	1	12419	PPHLN1
GO:BP	gene silencing by RNA	GO:0031047	0.868929	0.0610159	63	166	1	12419	ASZ1
GO:BP	hormone transport	GO:0009914	0.868929	0.0610159	142	166	2	12419	PICK1,PLA2G6
GO:BP	positive regulation of cellular protein localization	GO:1903829	0.868929	0.0610159	143	166	2	12419	CCT2,MIEF1
GO:BP	renal tubule development	GO:0061326	0.868929	0.0610159	63	166	1	12419	LGR5
GO:BP	localization within membrane	GO:0051668	0.868929	0.0610159	300	166	4	12419	MICALL1,MIEF1,SAMM50,TOMM22
GO:BP	cellular component organization or biogenesis	GO:0071840	0.868929	0.0610159	3110	166	41	12419	APPL2,ASZ1,BRAF,C1AH12ORF73,CBY1,CCT2,CELSR1,CLRN1,DMC1,FBXO7,HELB,IFT27,INTS13,IQGAP3,LMOD2,LOC100225408,MAP6D1,MCM5,MICALL1,MIEF1,NDUFA12,NDUFB2,NTF3,PARVG,PDXP,PHETA2,PPHLN1,RECQL,SAMM50,SNU13,SPAM1,STK38L,SYCE3,TOMM22,TSPO,TTC26,TTLL1,TWF1,WASL,WEE2,YEATS4
GO:BP	regulation of cellular ketone metabolic process	GO:0010565	0.868929	0.0610159	63	166	1	12419	APPL2
GO:BP	negative regulation of cellular component movement	GO:0051271	0.868929	0.0610159	143	166	2	12419	BRAF,WASL
GO:BP	organic acid biosynthetic process	GO:0016053	0.868929	0.0610159	142	166	2	12419	LTA4H,TBXAS1
GO:BP	receptor internalization	GO:0031623	0.868929	0.0610159	63	166	1	12419	NTF3
GO:CC	Golgi membrane	GO:0000139	0.869364	0.0607985	198	166	2	12419	KDELR3,LGR5
GO:CC	nuclear chromosome	GO:0000228	0.869364	0.0607985	100	166	1	12419	HELB
GO:CC	Golgi apparatus subcompartment	GO:0098791	0.869364	0.0607985	288	166	3	12419	KDELR3,LGR5,PHETA2
GO:CC	catalytic complex	GO:1902494	0.871485	0.0597401	718	166	8	12419	FBXO7,GPR37,NCF4,NDUFB2,POLR3B,POLR3H,PRDM4,YEATS4
GO:BP	organic substance metabolic process	GO:0071704	0.871772	0.0595972	5820	166	77	12419	ADCK2,ADSL,APAF1,APPL2,ASCL4,ASZ1,BRAF,CCT2,CHPT1,CMAS,CPM,CREB3L2,DBX2,DMC1,DUS4L,ELK3,FBXO7,FOXRED2,GCAT,GPR37,GXYLT1,HAL,HELB,HMGA2,IQGAP3,LOC100221944,LOC100225408,LOC105759175,LTA4H,MAP6D1,MCM10,MCM5,MED21,METAP2,MTERF2,NAGA,NFAM1,NFYB,NTF3,OTOGL,PAH,PDE6H,PDXP,PHETA2,PHLDA1,PHYH,PLA2G6,POLR3B,POLR3H,PPHLN1,PRDM4,PUS7,RECQL,REP15,RXYLT1,SNU13,SPAM1,SREBF2,STK38L,SYCE3,TAB1,TBXAS1,TEF,THAP5,T…
GO:BP	positive regulation of phosphorylation	GO:0042327	0.871772	0.0595972	380	166	5	12419	IQGAP3,NTF3,PDE6H,TAB1,WEE2
GO:BP	regulation of DNA repair	GO:0006282	0.871772	0.0595972	65	166	1	12419	HELB
GO:BP	mRNA splicing, via spliceosome	GO:0000398	0.871772	0.0595972	146	166	2	12419	SNU13,ZCRB1
GO:BP	regulation of cell activation	GO:0050865	0.871772	0.0595972	225	166	3	12419	BRAF,FBXO7,NFAM1
GO:BP	positive regulation of intracellular protein transport	GO:0090316	0.871772	0.0595972	65	166	1	12419	MIEF1
GO:BP	RNA splicing, via transesterification reactions with bulged adenosine as nucleophile	GO:0000377	0.871772	0.0595972	146	166	2	12419	SNU13,ZCRB1
GO:BP	alpha-beta T cell activation	GO:0046631	0.871772	0.0595972	65	166	1	12419	BRAF
GO:BP	response to organonitrogen compound	GO:0010243	0.871772	0.0595972	383	166	5	12419	APPL2,FOXRED2,ITPR2,PDXP,SREBF2
GO:BP	regulation of protein transport	GO:0051223	0.871772	0.0595972	223	166	3	12419	MIEF1,PICK1,PLA2G6
GO:BP	negative regulation of locomotion	GO:0040013	0.871772	0.0595972	144	166	2	12419	BRAF,WASL
GO:BP	ERBB signaling pathway	GO:0038127	0.871772	0.0595972	64	166	1	12419	PDE6H
GO:BP	postsynapse organization	GO:0099173	0.871772	0.0595972	64	166	1	12419	WASL
GO:BP	mononuclear cell migration	GO:0071674	0.871772	0.0595972	65	166	1	12419	WASL
GO:BP	mesoderm development	GO:0007498	0.871772	0.0595972	65	166	1	12419	PUS7
GO:BP	regulation of GTPase activity	GO:0043087	0.871772	0.0595972	223	166	3	12419	IQGAP3,LOC100224455,NTF3
GO:BP	regulation of T cell differentiation	GO:0045580	0.871772	0.0595972	65	166	1	12419	BRAF
GO:BP	heart morphogenesis	GO:0003007	0.871772	0.0595972	145	166	2	12419	TAB1,WNT2
GO:BP	negative regulation of secretion by cell	GO:1903531	0.871772	0.0595972	64	166	1	12419	BRAF
GO:BP	glycosylation	GO:0070085	0.871772	0.0595972	146	166	2	12419	GXYLT1,RXYLT1
GO:BP	regulation of response to external stimulus	GO:0032101	0.871772	0.0595972	381	166	5	12419	APPL2,BRAF,NTF3,POLR3B,TTLL12
GO:BP	cellular component biogenesis	GO:0044085	0.871772	0.0595972	1456	166	19	12419	APPL2,BRAF,C1AH12ORF73,CBY1,CCT2,CLRN1,LMOD2,NDUFA12,NDUFB2,PDXP,PPHLN1,SAMM50,SNU13,SYCE3,TTC26,TTLL1,TWF1,WASL,WEE2
GO:BP	cell development	GO:0048468	0.872135	0.0594165	1001	166	13	12419	APPL2,BRAF,CLRN1,FBXO7,IFT27,LGR5,LMOD2,MICALL1,TTC26,TTLL1,WASL,WEE2,WNT2
GO:CC	basal part of cell	GO:0045178	0.872463	0.059253	104	166	1	12419	CLRN1
GO:BP	muscle cell development	GO:0055001	0.873269	0.0588518	66	166	1	12419	LMOD2
GO:BP	cellular macromolecule biosynthetic process	GO:0034645	0.873269	0.0588518	2374	166	31	12419	ASCL4,CCT2,CREB3L2,DBX2,ELK3,GXYLT1,HELB,HMGA2,LOC100221944,MAP6D1,MCM10,MCM5,MED21,MTERF2,NFYB,PHLDA1,POLR3B,POLR3H,PPHLN1,PRDM4,PUS7,RXYLT1,SREBF2,TEF,THAP5,TRIM24,WASL,WEE2,WNT2,YARS2,YEATS4
GO:BP	regulation of response to cytokine stimulus	GO:0060759	0.873269	0.0588518	66	166	1	12419	TTLL12
GO:BP	fatty acid biosynthetic process	GO:0006633	0.873269	0.0588518	66	166	1	12419	TBXAS1
GO:BP	response to glucose	GO:0009749	0.873269	0.0588518	66	166	1	12419	PLA2G6
GO:BP	negative regulation of immune response	GO:0050777	0.873269	0.0588518	66	166	1	12419	TTLL12
GO:BP	positive regulation of autophagy	GO:0010508	0.873269	0.0588518	66	166	1	12419	FBXO7
GO:BP	RNA splicing, via transesterification reactions	GO:0000375	0.873269	0.0588518	147	166	2	12419	SNU13,ZCRB1
GO:MF	kinase activity	GO:0016301	0.874579	0.0582009	562	166	6	12419	ADCK2,BRAF,LOC100222446,STK38L,TWF1,WEE2
GO:MF	protein serine kinase activity	GO:0106310	0.874579	0.0582009	108	166	1	12419	BRAF
GO:MF	cation channel activity	GO:0005261	0.874589	0.0581962	209	166	2	12419	ITPR2,KCNMB4
GO:MF	protein threonine kinase activity	GO:0106311	0.874589	0.0581962	109	166	1	12419	BRAF
GO:CC	nuclear speck	GO:0016607	0.875675	0.0576569	219	166	2	12419	GCAT,TAB1
GO:CC	chromosome, centromeric region	GO:0000775	0.875675	0.0576569	110	166	1	12419	NUP37
GO:CC	lytic vacuole	GO:0000323	0.875675	0.0576569	218	166	2	12419	C1AH12ORF66,NAGA
GO:CC	nuclear envelope	GO:0005635	0.875675	0.0576569	208	166	2	12419	NUP37,YEATS4
GO:CC	cytoplasmic ribonucleoprotein granule	GO:0036464	0.875675	0.0576569	110	166	1	12419	ASZ1
GO:CC	cation channel complex	GO:0034703	0.875675	0.0576569	118	166	1	12419	KCNMB4
GO:CC	postsynaptic membrane	GO:0045211	0.875675	0.0576569	117	166	1	12419	CHRM2
GO:CC	ribonucleoprotein granule	GO:0035770	0.875675	0.0576569	119	166	1	12419	ASZ1
GO:CC	midbody	GO:0030496	0.875675	0.0576569	108	166	1	12419	PDXP
GO:CC	lysosome	GO:0005764	0.875675	0.0576569	218	166	2	12419	C1AH12ORF66,NAGA
GO:CC	anchoring junction	GO:0070161	0.875675	0.0576569	306	166	3	12419	IQGAP3,PDXP,TWF1
GO:CC	perinuclear region of cytoplasm	GO:0048471	0.875675	0.0576569	297	166	3	12419	PICK1,REP15,TWF1
GO:CC	late endosome	GO:0005770	0.875675	0.0576569	117	166	1	12419	MICALL1
GO:CC	transport vesicle	GO:0030133	0.875675	0.0576569	112	166	1	12419	CLRN1
GO:MF	mRNA binding	GO:0003729	0.87714	0.0569311	111	166	1	12419	LOC105759175
GO:CC	integral component of membrane	GO:0016021	0.877907	0.0565516	2776	166	33	12419	ASZ1,CCDC107,CELSR1,CHPT1,CHRM2,CLRN1,CREB3L2,GPR37,GPR85,ITPR2,KCNMB4,KDELR3,LGR5,LOC100222415,LSMEM1,MIEF1,NCF4,NDUFB2,NFAM1,RXYLT1,SAMM50,SLC37A3,SPAM1,SREBF2,SSTR3,STAB2,TBXAS1,TMEM117,TMEM19,TOMM22,TSPO,VT1,WNT2
GO:BP	DNA-templated transcription, initiation	GO:0006352	0.87875	0.0561346	67	166	1	12419	LOC100221944
GO:BP	multicellular organismal signaling	GO:0035637	0.87875	0.0561346	67	166	1	12419	KCNMB4
GO:BP	cardiocyte differentiation	GO:0035051	0.87875	0.0561346	67	166	1	12419	CBY1
GO:BP	organic cyclic compound metabolic process	GO:1901360	0.87875	0.0561346	2909	166	38	12419	ADSL,ASCL4,ASZ1,CCT2,CREB3L2,DBX2,DMC1,DUS4L,ELK3,GPR37,HELB,HMGA2,LOC100221944,MCM10,MCM5,MED21,MTERF2,NFYB,PAH,PDXP,POLR3B,POLR3H,PPHLN1,PRDM4,PUS7,RECQL,SNU13,SREBF2,SYCE3,TEF,THAP5,TPRKB,TRIM24,WASL,WNT2,YARS2,YEATS4,ZCRB1
GO:BP	response to monosaccharide	GO:0034284	0.880488	0.0552765	68	166	1	12419	PLA2G6
GO:BP	neuron death	GO:0070997	0.880488	0.0552765	150	166	2	12419	BRAF,FBXO7
GO:BP	positive regulation of cell-substrate adhesion	GO:0010811	0.880488	0.0552765	68	166	1	12419	BRAF
GO:BP	regulation of cold-induced thermogenesis	GO:0120161	0.880488	0.0552765	68	166	1	12419	APPL2
GO:BP	microtubule cytoskeleton organization	GO:0000226	0.880488	0.0552765	311	166	4	12419	INTS13,MAP6D1,TTC26,TTLL1
GO:BP	cellular response to leukemia inhibitory factor	GO:1990830	0.880488	0.0552765	68	166	1	12419	NFYB
GO:BP	response to hexose	GO:0009746	0.880488	0.0552765	68	166	1	12419	PLA2G6
[truncated: 2,305 more rows]

## Sheet: e_GO_OT_Thistle1
source	term_name	term_id	adjusted_p_value	negative_log10_of_adjusted_p_value	term_size	query_size	intersection_size	effective_domain_size	intersections
GO:BP	axoneme assembly	GO:0035082	5.02294e-05	4.29904	41	32	5	12419	CFAP46,DNAAF6,DNAH1,FOXJ1,SPEF2
GO:BP	microtubule bundle formation	GO:0001578	0.000176827	3.75245	60	32	5	12419	CFAP46,DNAAF6,DNAH1,FOXJ1,SPEF2
GO:BP	cilium or flagellum-dependent cell motility	GO:0001539	0.00261482	2.58256	59	32	4	12419	CFAP46,DNAAF6,DNAH1,SPEF2
GO:BP	cilium movement involved in cell motility	GO:0060294	0.00261482	2.58256	57	32	4	12419	CFAP46,DNAAF6,DNAH1,SPEF2
GO:BP	cilium-dependent cell motility	GO:0060285	0.00261482	2.58256	59	32	4	12419	CFAP46,DNAAF6,DNAH1,SPEF2
GO:BP	cilium movement	GO:0003341	0.00455225	2.34177	71	32	4	12419	CFAP46,DNAAF6,DNAH1,SPEF2
GO:BP	motile cilium assembly	GO:0044458	0.00677447	2.16912	29	32	3	12419	DNAH1,FOXJ1,SPEF2
GO:BP	cilium assembly	GO:0060271	0.00803007	2.09528	173	32	5	12419	CFAP46,DNAAF6,DNAH1,FOXJ1,SPEF2
GO:BP	cilium organization	GO:0044782	0.0103133	1.9866	187	32	5	12419	CFAP46,DNAAF6,DNAH1,FOXJ1,SPEF2
GO:BP	microtubule cytoskeleton organization	GO:0000226	0.0107417	1.96893	311	32	6	12419	CCDC170,CFAP46,DNAAF6,DNAH1,FOXJ1,SPEF2
GO:BP	inner dynein arm assembly	GO:0036159	0.0192113	1.71644	10	32	2	12419	DNAAF6,DNAH1
GO:BP	flagellated sperm motility	GO:0030317	0.0192113	1.71644	49	32	3	12419	DNAAF6,DNAH1,SPEF2
GO:BP	sperm motility	GO:0097722	0.0192113	1.71644	49	32	3	12419	DNAAF6,DNAH1,SPEF2
GO:BP	cell projection assembly	GO:0030031	0.0311789	1.50614	265	32	5	12419	CFAP46,DNAAF6,DNAH1,FOXJ1,SPEF2
GO:BP	plasma membrane bounded cell projection assembly	GO:0120031	0.0311789	1.50614	262	32	5	12419	CFAP46,DNAAF6,DNAH1,FOXJ1,SPEF2
GO:BP	negative regulation of B cell activation	GO:0050869	0.0387994	1.41117	16	32	2	12419	FOXJ1,PAWR
GO:BP	axonemal dynein complex assembly	GO:0070286	0.0387994	1.41117	16	32	2	12419	DNAAF6,DNAH1
GO:BP	sperm flagellum assembly	GO:0120316	0.0419138	1.37764	18	32	2	12419	DNAH1,SPEF2
[truncated: 1,633 more rows]

## Sheet: f_GO_OT_Lightyellow
source	term_name	term_id	adjusted_p_value	negative_log10_of_adjusted_p_value	term_size	query_size	intersection_size	effective_domain_size	intersections
[truncated: 4,688 more rows]

[truncated: 1 more sheets: g Module trait correlations]
